# Supplementary material for: Transcriptome and Coexpression Network Analyses Reveal Hub Genes in Chinese Cabbage (Brassica rapa L. ssp. pekinensis) During Different Stages of Plasmodiophora brassicae Infection
Source: Front Plant Sci. 2021 Aug 10;12:650252. doi: 10.3389/fpls.2021.650252 (PMC8383047; doi:10.3389/fpls.2021.650252)
Supplement: Supplementary Table 1 — The FPKM and annotation of all expressed genes. [file Table_1.XLSX]

## Sheet: Sheet1
Table S1 The FPKM and annotation of all expressed genes.
name	DH199S0d1	DH199S0d2	DH199S0d3	DH199S2d1	DH199S2d2	DH199S2d3	DH199S5d1	DH199S5d2	DH199S5d3	DH199S8d1	DH199S8d2	DH199S8d3	DH199S13d1	DH199S13d2	DH199S13d3	DH199S22d1	DH199S22d2	DH199S22d3	DH40R0d1	DH40R0d2	DH40R0d3	DH40R2d1	DH40R2d2	DH40R2d3	DH40R5d1	DH40R5d2	DH40R5d3	DH40R8d1	DH40R8d2	DH40R8d3	DH40R13d1	DH40R13d2	DH40R13d3	DH40R22d1	DH40R22d2	DH40R22d3	GeneName	Biotype	Position	NR:Seq-id	NR:Score	NR:Evalue	NR:Description	NT:Seq-id	NT:Score	NT:Evalue	NT:Description	Uniprot:UniProtKB-AC	Uniprot:Score
BraA01g000010.3C	0.279648	0.273613	0.285445	0	0.0794864	0.197145	0.272349	0.0743801	0.23693	0	0	0.212956	0.0738037	0.0749948	0.206383	0	0.0952259	0.182627	0.0709046	0	0	0.149123	0.0764088	0	0.0749652	0	0.216912	0	0.0648077	0	0	0	0	0.398621	0	0.147029	BraA01g000010.3C	protein_coding	chrA01:2864-5220:-	gi|674872303|emb|CDY61891.1|	1782	0	BnaAnng17930D [Brassica napus]	gi|685327273|ref|XM_009103716.1|	612	0	PREDICTED: Brassica rapa protein WVD2-like 1 (LOC103828118), mRNA	Q8GYX9	125
BraA01g000020.3C	10.7222	6.94244	8.74484	8.24521	7.82827	8.69519	7.88294	8.55559	9.38119	5.90636	5.89569	7.52469	6.54729	6.37105	6.98212	6.8763	7.44543	7.68874	8.47565	8.78822	9.4531	7.95984	8.15706	7.78335	6.31218	5.94822	6.74039	4.66108	5.4569	5.53388	7.5676	6.16917	6.17908	6.24339	6.15554	5.41626	BraA01g000020.3C	protein_coding	chrA01:5264-7621:-	gi|923503269|ref|XP_013670397.1|	2091	0	PREDICTED: protein LAZ1-like [Brassica napus]	gi|923503268|ref|XM_013814943.1|	1142	0	PREDICTED: Brassica napus protein LAZ1-like (LOC106345161), mRNA	F4JTN2	763
BraA01g000030.3C	0.274826	1.25485	2.15068	2.28245	2.39556	2.32495	1.33827	1.26703	1.34533	1.41667	1.4821	1.58126	2.321	1.86711	1.53245	3.09291	1.99646	4.06818	2.50856	3.62048	3.27598	3.90805	3.00366	2.9219	2.94691	1.67854	1.89486	1.71507	2.71745	1.89299	2.14947	2.03426	1.16673	1.21877	1.98681	2.40823	BraA01g000030.3C	protein_coding	chrA01:8705-9661:-	gi|923516415|ref|XP_013648460.1|	1282	4e-175	PREDICTED: amino acid transporter ANTL2-like [Brassica napus]	gi|922522283|ref|XM_013739774.1|	525	0	PREDICTED: Brassica oleracea var. oleracea amino acid transporter ANTL2 (LOC106303511), mRNA	Q9SVG0	412
BraA01g000040.3C	42.9912	32.2905	43.2624	49.2002	45.5026	47.7692	28.7891	33.4604	33.1648	93.3755	96.5232	88.1932	56.9263	56.3972	58.2425	51.2687	52.3065	63.5564	86.9978	61.9629	64.5961	55.6394	45.6586	41.8224	44.8683	44.0816	40.9023	82.6613	88.0882	86.0008	62.8385	62.3025	60.2349	20.4592	22.2486	28.9548	BraA01g000040.3C	protein_coding	chrA01:10292-11917:-	gi|685255984|ref|XP_009132387.1|	2300	0	PREDICTED: aminoacylase-1B-like isoform X2 [Brassica rapa]	gi|685255983|ref|XM_009134139.1|	1296	0	PREDICTED: Brassica rapa aminoacylase-1B-like (LOC103827501), transcript variant X2, mRNA	Q6PTT0	372
BraA01g000050.3C	4.30419	8.53345	3.93096	11.602	14.2946	11.4986	7.17028	5.18182	6.14182	10.7433	11.1173	9.54559	13.9901	11.6643	13.4863	37.1264	34.8674	45.5662	14.8191	15.7251	15.6065	21.7442	14.7315	17.1605	10.5666	5.73787	7.38004	10.4912	13.4398	11.4799	12.8052	16.1694	14.4258	10.7638	10.8089	10.7194	BraA01g000050.3C	protein_coding	chrA01:12431-13279:+	gi|923503286|ref|XP_013639853.1|	1221	9e-168	PREDICTED: expansin-A20-like [Brassica napus]	gi|685255987|ref|XR_626223.1|	774	0	PREDICTED: Brassica rapa expansin-A20 (LOC103872451), transcript variant X2, misc_RNA	Q9SZM1	440
BraA01g000060.3C	0	0	0	0	0	0	0	0.0841052	0	0	0	0	0	0	0	0	0	0	0	0	0	0	0.0287997	0	0	0.0284015	0	0	0	0	0	0	0	0	0	0	BraA01g000060.3C	protein_coding	chrA01:16133-19645:+	gi|923503288|ref|XP_013649481.1|	5438	0	PREDICTED: cellulose synthase-like protein D4 [Brassica napus]	gi|923503287|ref|XM_013794027.1|	3297	0	PREDICTED: Brassica napus cellulose synthase-like protein D4 (LOC106351011), mRNA	Q9SZL9	2065
BraA01g000070.3C	89.9425	110.876	93.2433	134.734	136.962	130.935	117.321	115.958	132.66	54.3418	54.0497	54.2885	60.2145	60.3736	62.8371	59.0765	54.6942	63.0497	103.953	75.3503	82.1914	77.3396	85.1704	93.3319	65.6884	54.4786	54.4014	75.2939	77.7572	74.4448	80.9195	80.4582	81.5418	99.9742	110.327	89.9107	BraA01g000070.3C	protein_coding	chrA01:21106-22090:-	gi|685255991|ref|XP_009124092.1|	1140	4e-155	PREDICTED: expansin-like A2 [Brassica rapa]	gi|685255990|ref|XM_009125844.1|	810	0	PREDICTED: Brassica rapa expansin-like A2 (LOC103845929), mRNA	Q9SVE5	384
BraA01g000080.3C	19.7773	14.7295	21.1917	20.2477	21.5909	22.1971	15.2364	17.6915	15.1167	16.3319	20.4822	15.785	23.9944	21.3208	27.4973	18.6863	25.7321	20.8195	21.8544	25.2264	25.5619	28.5432	29.358	28.5813	26.6932	27.0431	23.3033	21.7175	20.34	24.4954	29.6981	28.0922	30.1721	20.8513	22.4068	22.8657	BraA01g000080.3C	protein_coding	chrA01:23348-24434:+	gi|685255993|ref|XP_009125880.1|	1475	0	PREDICTED: heterodimeric geranylgeranyl pyrophosphate synthase small subunit, chloroplastic [Brassica rapa]	gi|685255992|ref|XM_009127632.1|	639	0	PREDICTED: Brassica rapa heterodimeric geranylgeranyl pyrophosphate synthase small subunit, chloroplastic (LOC103850518), mRNA	Q39108	410
BraA01g000090.3C	263.266	344.217	257.819	201.847	198.826	201.889	190.12	202.282	193.606	16.3082	18.5016	17.3651	57.9046	54.5419	52.9636	26.949	24.6242	37.1629	158.869	225.459	241.57	222.275	231.767	243.669	223.148	191.641	185.534	34.0076	35.8021	31.1307	109.222	108.454	106.871	45.0479	48.1193	60.5939	BraA01g000090.3C	protein_coding	chrA01:29350-32812:+	gi|923503295|ref|XP_013673639.1|	2557	0	PREDICTED: RAF proto-oncogene serine/threonine-protein kinase-like isoform X2 [Brassica napus]	gi|685255996|ref|XM_009129333.1|	1459	0	PREDICTED: Brassica rapa probable serine/threonine-protein kinase drkD (LOC103851482), transcript variant X2, mRNA	F4JTP5	805
BraA01g000100.3C	15.4711	43.7298	17.2958	35.3513	36.0174	39.4721	40.1795	45.7219	45.7733	22.5326	24.8976	22.9396	38.1087	38.9872	42.2882	111.584	126.103	94.6209	38.8533	25.3831	24.0209	43.7381	60.9255	58.1854	37.6552	28.3211	32.7628	30.7309	24.3579	29.9637	44.7866	47.261	43.7867	51.8074	51.6621	59.9086	BraA01g000100.3C	protein_coding	chrA01:33188-33706:-	gi|923503301|ref|XP_013697590.1|	638	1e-83	PREDICTED: chromatin-remodeling complex subunit ies6-like [Brassica napus]	gi|923503303|ref|XM_013850828.1|	351	0	PREDICTED: Brassica napus chromatin-remodeling complex subunit ies6-like (LOC106407378), mRNA	Q9UTE8	68.9
BraA01g000110.3C	0	0	0	0	0	0	0	0	0	0	0	0	0	0	0	0	0	0	0	0	0	0	0	0.176131	0	0	0	0	0	0	0	0	0	0	0	0	BraA01g000110.3C	protein_coding	chrA01:65395-65961:-	gi|685256005|ref|XP_009131015.1|	881	3e-118	PREDICTED: dirigent protein 15 [Brassica rapa]	gi|685256004|ref|XM_009132767.1|	567	0	PREDICTED: Brassica rapa dirigent protein 15 (LOC103855426), mRNA	F4JUF8	259
BraA01g000130.3C	0	0	0.301303	0	0	0	0	0	0	0.304322	0	0	0	0.316645	0	0	0	0.385547	0	0.299128	0	0	0	0	0	0	0	0.29086	0	0	0	0	0	0	0	0	BraA01g000130.3C	protein_coding	chrA01:79510-79806:-	gi|685256009|ref|XP_009133442.1|	469	1e-58	PREDICTED: auxin-induced protein X15-like [Brassica rapa]	gi|923503356|ref|XM_013887766.1|	297	2e-153	PREDICTED: Brassica napus auxin-induced protein X15-like (LOC106445788), mRNA	P33079	112
BraA01g000140.3C	0	0	0	0	0	0	0	0	0	0	0	0	0	0	0	0	0	0	0	0	0	0	0	0	0	0	0	0	0	0	0	0.0792345	0	0	0	0	BraA01g000140.3C	protein_coding	chrA01:83151-84320:+	gi|674890738|emb|CDY41946.1|	1905	0	BnaA01g05180D [Brassica napus]	gi|199580211|gb|AC189521.2|	1170	0	Brassica rapa subsp. pekinensis clone KBrB091M07, complete sequence	.	.
BraA01g000150.3C	0	0	0.844218	1.01761	0.626893	0.259141	0.805486	0	0.93431	0	0	0	2.61933	0.887203	1.6277	12.4105	17.2736	15.1236	0	0.558748	0.579932	1.1761	0	0	0.886852	0	0	0	0	0	0.294031	0.583046	0	0.523974	1.19584	0.289896	BraA01g000150.3C	protein_coding	chrA01:88205-88522:+	gi|685256011|ref|XP_009134559.1|	552	4e-71	PREDICTED: auxin-induced protein 15A-like [Brassica rapa]	gi|923503347|ref|XM_013886721.1|	318	4e-165	PREDICTED: Brassica napus auxin-induced protein 15A-like (LOC106444916), mRNA	O65695	166
BraA01g000160.3C	0.214876	0.0525599	0.274164	0.0991423	0	0	0	0.114305	0.121369	0	0	0	0	0.0576247	0.0528603	0.0755697	0	0.841966	0.0544818	0	0.169502	0	0.117422	0.0611926	0.0576019	0.115799	0	0.211729	0.199188	0.211437	0	0.0568041	0.0526282	0.0510489	0.174759	0.169461	BraA01g000160.3C	protein_coding	chrA01:93335-94966:+	gi|685256013|ref|XP_009135653.1|	2786	0	PREDICTED: amidophosphoribosyltransferase 3, chloroplastic [Brassica rapa]	gi|685256012|ref|XM_009137405.1|	1632	0	PREDICTED: Brassica rapa amidophosphoribosyltransferase 3, chloroplastic (LOC103859513), mRNA	Q9T0J5	928
BraA01g000170.3C	6.60894	10.0294	7.43431	20.3702	20.9575	19.2282	18.7401	19.5633	20.3153	11.5876	13.1896	13.5577	18.6523	17.169	17.2978	33.8366	31.6598	23.1951	26.3551	24.0098	21.0426	25.1251	25.6003	27.4504	26.5146	22.4357	22.1325	20.2009	19.3378	20.0846	19.5635	20.2048	20.9217	18.0295	21.6465	23.685	BraA01g000170.3C	protein_coding	chrA01:95215-98101:-	gi|685256015|ref|XP_009136626.1|	3496	0	PREDICTED: tRNA-dihydrouridine(47) synthase [NAD(P)(+)]-like [Brassica rapa]	gi|685256014|ref|XM_009138378.1|	1950	0	PREDICTED: Brassica rapa tRNA-dihydrouridine(47) synthase [NAD(P)(+)]-like (LOC103860413), mRNA	Q9T0J6	1165
BraA01g000180.3C	14.5661	14.1627	13.2883	8.23282	10.1436	8.98515	9.22085	8.13593	9.76999	4.78667	4.71316	3.51255	8.26509	6.73832	5.46453	11.5261	12.0281	10.8205	7.20179	10.886	9.00069	9.32088	7.16386	8.71108	6.83327	6.67232	4.70764	5.02345	7.17326	7.43522	8.83559	7.99009	8.20541	8.82431	8.58878	9.38143	BraA01g000180.3C	protein_coding	chrA01:98985-100763:-	gi|685256017|ref|XP_009137623.1|	1413	0	PREDICTED: protein BASIC PENTACYSTEINE5-like [Brassica rapa]	gi|685256022|ref|XM_009141238.1|	869	0	PREDICTED: Brassica rapa protein BASIC PENTACYSTEINE5-like (LOC103861339), transcript variant X4, mRNA	F4JUI3	397
BraA01g000190.3C	0.683794	0.2817	0.844911	1.56088	1.5958	1.92824	5.67808	4.25011	3.98424	1.55834	2.09611	1.53475	1.36773	1.19678	1.23948	2.37951	2.40199	1.78624	4.56252	3.75641	2.64969	3.45444	3.54003	3.93562	2.8171	1.78433	3.05208	4.50367	3.7365	5.20574	3.41612	3.8056	3.8079	3.00962	3.35629	4.61692	BraA01g000190.3C	protein_coding	chrA01:101158-104774:-	gi|674890744|emb|CDY41952.1|	3975	0	BnaA01g05240D [Brassica napus]	gi|685256028|ref|XM_009143461.1|	1152	0	PREDICTED: Brassica rapa kinesin-like protein NACK1 (LOC103864107), transcript variant X3, mRNA	F4JUI9	1230
BraA01g000200.3C	0	0	0	0	0	0	0	0	0	0	0	0	0	0	0	0	0	0	0	0	0	0	0.0778997	0	0	0	0	0	0	0	0	0	0	0	0	0	BraA01g000200.3C	protein_coding	chrA01:106156-108198:-	gi|685256031|ref|XP_009142782.1|	2084	0	PREDICTED: probable fructose-bisphosphate aldolase 2, chloroplastic [Brassica rapa]	gi|685256030|ref|XM_009144534.1|	912	0	PREDICTED: Brassica rapa probable fructose-bisphosphate aldolase 2, chloroplastic (LOC103866271), mRNA	Q944G9	796
BraA01g000210.3C	0.213308	0.626115	0.43546	0.393674	0.727562	0	0.415482	0.226941	0	3.07876	0	0	0.450364	0.457633	0.209898	0	0.290543	0	0.432673	0	0.224353	0.227494	0.233131	0.485968	0.228726	0.689721	0.661818	0.210183	0	0	0.909994	0.451116	0.208976	0.40541	0.462623	0.448598	BraA01g000210.3C	protein_coding	chrA01:109186-109996:-	gi|674917489|emb|CDY15656.1|	495	2e-61	BnaA07g08270D [Brassica napus]	gi|685347977|ref|XM_009111521.1|	265	2e-135	PREDICTED: Brassica rapa uncharacterized LOC103835365 (LOC103835365), mRNA	Q9FN50	81.6
BraA01g000230.3C	0	0.180205	0	1.47297	0.907414	1.15416	0.478328	0.261268	0.346768	0.82282	1.52299	0.935037	1.16659	1.58056	1.93318	2.41823	1.67245	1.84431	0.24906	0.248854	0.452006	0.52381	0.738084	0.839213	0.526646	0.198512	0.571444	0.483951	0.512199	0.181232	1.11312	0.779028	1.26308	0.525075	0.2663	1.03291	BraA01g000230.3C	protein_coding	chrA01:116219-119133:-	gi|685256037|ref|XP_009145337.1|	2457	0	PREDICTED: endoglucanase 24 [Brassica rapa]	gi|685256036|ref|XM_009147089.1|	1425	0	PREDICTED: Brassica rapa endoglucanase 24 (LOC103868753), mRNA	Q93YQ7	894
BraA01g000240.3C	19.5725	13.2088	20.3103	28.5177	27.6775	25.7362	48.631	47.5304	44.8943	90.8867	90.7567	90.8322	54.202	56.2982	55.4313	26.9236	29.6133	40.1519	39.0409	26.482	26.4025	26.7143	18.9619	18.5898	39.3582	41.4899	43.0636	64.4284	66.8948	62.5259	56.0896	56.0698	56.9939	57.7567	58.1467	59.5196	BraA01g000240.3C	protein_coding	chrA01:126436-129380:+	gi|685256039|ref|XP_009146306.1|	2725	0	PREDICTED: enhanced disease susceptibility 5 [Brassica rapa]	gi|685256038|ref|XM_009148058.1|	1617	0	PREDICTED: Brassica rapa enhanced disease susceptibility 5 (LOC103869670), mRNA	Q945F0	908
BraA01g000250.3C	0.121763	1.78704	0.745726	1.68542	1.66127	1.60235	1.54161	1.03636	1.23796	1.50639	0.525321	2.10176	2.31374	1.95924	0.838716	0.856457	0.497555	2.22653	2.22286	2.22102	2.8175	4.15556	3.32697	2.35796	1.8279	3.14973	1.63708	0.359939	0.902987	0	4.02578	1.67383	2.26652	0.231422	0.396121	0.51215	BraA01g000250.3C	protein_coding	chrA01:131143-133804:-	gi|685256042|ref|XP_009148051.1|	980	9e-132	PREDICTED: B-box zinc finger protein 20-like [Brassica rapa]	gi|685256041|ref|XM_009149803.1|	720	0	PREDICTED: Brassica rapa B-box zinc finger protein 20-like (LOC103871219), mRNA	Q0IGM7	323
BraA01g000260.3C	32.8672	14.3662	29.0632	20.2415	18.7654	20.4841	12.2819	13.9871	12.7126	31.4906	29.3229	29.0552	26.4751	23.76	22.4986	18.3437	19.0263	19.4112	21.4134	21.8301	21.7559	15.7739	13.9781	14.3655	21.5671	20.9083	22.8335	22.3532	21.0292	21.1272	17.946	18.3218	14.8049	13.7156	13.1717	12.7349	BraA01g000260.3C	protein_coding	chrA01:137555-142089:+	gi|923503371|ref|XP_013746809.1|	4293	0	PREDICTED: V-type proton ATPase subunit a3-like [Brassica napus]	gi|923503370|ref|XM_013891355.1|	2433	0	PREDICTED: Brassica napus V-type proton ATPase subunit a3-like (LOC106449276), mRNA	Q8W4S4	1514
BraA01g000270.3C	187.013	131.852	191.214	127.432	120.984	125.028	111.445	109.325	108.546	181.995	182.435	183.191	194.824	206.061	207.231	73.1712	81.7721	124.776	125.72	126.824	127.706	66.2292	45.6518	51.2901	125.512	114.263	114.65	94.4448	88.0413	92.6739	97.2284	98.9182	101.527	98.48	69.6656	78.409	BraA01g000270.3C	protein_coding	chrA01:143038-144359:-	gi|685256046|ref|XP_009150026.1|	1779	0	PREDICTED: cysteine proteinase RD19a [Brassica rapa]	gi|685256045|ref|XM_009151778.1|	1101	0	PREDICTED: Brassica rapa cysteine proteinase RD19a (LOC103873055), mRNA	P43296	654
BraA01g000280.3C	0	0	0	0	0	0.486175	0.251863	0	0	0.799855	0	0	0	0.277415	0	0	0.352251	0	0.262284	1.04827	0.272003	0.275811	0.282645	0.294591	0	0	0	0.254824	0	0	0	0	0.253361	0.245758	0.280439	0	BraA01g000280.3C	protein_coding	chrA01:147590-148034:-	gi|685256050|ref|XP_009151883.1|	340	7e-39	PREDICTED: uncharacterized protein LOC103874869 [Brassica rapa]	gi|685256049|ref|XM_009153635.1|	339	1e-176	PREDICTED: Brassica rapa uncharacterized LOC103874869 (LOC103874869), transcript variant X1, mRNA	.	.
BraA01g000290.3C	0	0	0.0540381	0	0	0.0497625	0	0	0.0598049	0.218318	0	0.0537533	0	0	0	0	0	0.0691469	0.107384	0.482831	0.222727	0.169384	0.0578603	0.0603058	0	0	0.164256	0.10433	0.0981508	0.15628	0.112925	0.111962	0.103731	0.402473	0.401861	0.0556684	BraA01g000290.3C	protein_coding	chrA01:149110-151698:-	gi|685256048|ref|XP_009150927.1|	2567	0	PREDICTED: probable receptor-like protein kinase At4g39110 [Brassica rapa]	gi|199580211|gb|AC189521.2|	1471	0	Brassica rapa subsp. pekinensis clone KBrB091M07, complete sequence	Q9T020	885
BraA01g000300.3C	0.389643	0.381235	0.39772	0.89889	1.32901	1.09876	0.948683	0.621818	0.660246	1.00426	1.4709	1.5825	0.411332	0	0.766826	0	0.530725	1.52676	0.197587	0.197424	0.409818	0	0	0	0	0.209982	0	0.959837	1.26418	0.383407	0.207782	0.20601	0	0.185137	1.69011	0	BraA01g000300.3C	protein_coding	chrA01:152707-153349:-	gi|685256053|ref|XP_009102260.1|	577	2e-73	PREDICTED: late embryogenesis abundant protein [Brassica rapa]	gi|685256052|ref|XM_009104012.1|	450	0	PREDICTED: Brassica rapa late embryogenesis abundant protein (LOC103828106), mRNA	P21298	69.7
BraA01g000310.3C	13.0645	10.2933	11.7211	14.213	12.1956	16.2874	8.16984	8.85176	8.15598	10.5625	10.7536	9.63462	11.4689	12.1703	15.0208	18.9589	18.7315	24.1588	9.41446	9.96412	11.6437	10.12	10.7465	11.279	10.6909	7.78167	7.1113	7.18184	6.50151	7.7809	12.9069	13.8875	10.7109	8.4292	8.35115	11.207	BraA01g000310.3C	protein_coding	chrA01:154145-155690:-	gi|685256055|ref|XP_009103194.1|	2192	0	PREDICTED: uncharacterized protein LOC103828982 [Brassica rapa]	gi|685256060|ref|XM_009107004.1|	1269	0	PREDICTED: Brassica rapa uncharacterized LOC103828982 (LOC103828982), transcript variant X4, mRNA	.	.
BraA01g000320.3C	25.2421	33.3166	26.9758	41.7398	42.3743	44.1095	30.1104	29.3786	30.333	48.2919	47.7814	49.1951	45.6042	46.3403	46.0929	55.5282	59.072	60.8493	57.0426	48.2402	47.2182	49.8667	52.3057	48.5341	36.8759	35.0578	35.6544	46.2391	45.699	49.5095	47.8802	48.1883	52.6953	32.4393	32.5163	41.061	BraA01g000320.3C	protein_coding	chrA01:156907-158783:-	gi|685256063|ref|XP_009106281.1|	1660	0	PREDICTED: chaperone protein dnaJ 10 [Brassica rapa]	gi|923503387|ref|XM_013895779.1|	1035	0	PREDICTED: Brassica napus chaperone protein dnaJ 10-like (LOC106452627), transcript variant X2, mRNA	.	.
BraA01g000330.3C	44.7731	111.747	46.796	187.53	182.587	180.69	209.146	165.438	182.628	84.0264	88.1961	84.9322	131.041	134.882	140.35	357.92	357.144	250.375	183.267	142.091	136.481	200.153	246.135	255.316	140.003	84.6669	107.86	104.878	105.128	108.427	108.943	116.802	123.712	116.942	120.653	132.501	BraA01g000330.3C	protein_coding	chrA01:159360-160030:+	gi|15234970|ref|NP_195631.1|	378	1e-44	40S ribosomal protein S25-4 [Arabidopsis thaliana]	gi|923503391|ref|XM_013784400.1|	327	4e-170	PREDICTED: Brassica napus 40S ribosomal protein S25-4 (LOC106454100), transcript variant X2, mRNA	Q9T029	150
BraA01g000340.3C	0	0	0	0	0.346097	0.858403	0	0	0	0	0	0	0.642707	0	0.299541	0.856457	0.414629	3.18076	0	0	0.320171	0	0.332697	0	0.652822	0	0	0	0	0	0.649319	0.32189	0	0	0	0.320094	BraA01g000340.3C	protein_coding	chrA01:160814-161233:-	gi|685256067|ref|XP_009107919.1|	451	5e-56	PREDICTED: protein RADIALIS-like 1 [Brassica rapa]	gi|923800224|ref|XM_013831681.1|	288	2e-148	PREDICTED: Brassica napus protein RADIALIS-like 1 (LOC106391115), mRNA	F4JVB8	155
BraA01g000350.3C	576.038	579.044	632.083	548.599	573.188	544.491	453.797	494.021	473.716	777.41	807.125	784.392	539.968	539.068	562.065	788.402	833.206	948.842	758.59	786.124	758.981	556.411	650.731	592.459	987.932	638.447	709.592	976.031	955.117	959.163	610.344	695.567	643.555	701.421	727.695	913.386	BraA01g000350.3C	protein_coding	chrA01:163765-164530:-	gi|685256071|ref|XP_009109892.1|	454	1e-54	PREDICTED: glycine-rich RNA-binding protein 10 isoform X1 [Brassica rapa]	gi|685256070|ref|XM_009111644.1|	489	0	PREDICTED: Brassica rapa glycine-rich RNA-binding protein 10 (LOC103835157), transcript variant X1, mRNA	Q05966	166
BraA01g000360.3C	3.54221	9.81968	4.21825	13.3472	13.0888	11.9309	12.9366	13.1901	9.33681	14.3031	12.4167	13.7869	16.5156	17.7321	18.5897	42.3557	38.5982	34.3136	13.4719	14.6573	10.2455	13.537	12.9046	9.41501	10.4451	5.72677	6.71623	9.59837	7.93534	8.42333	7.55571	6.55485	7.80811	14.8671	5.12156	7.75984	BraA01g000360.3C	protein_coding	chrA01:165106-165697:+	gi|685256078|ref|XP_009112229.1|	362	1e-42	PREDICTED: uncharacterized protein LOC103836677 isoform X2 [Brassica rapa]	gi|923519974|ref|XM_013809576.1|	281	1e-144	PREDICTED: Brassica napus uncharacterized LOC106369408 (LOC106369408), transcript variant X2, mRNA	.	.
BraA01g000370.3C	0	0.402713	0	9.1155	11.2311	9.4787	1.60341	1.97055	3.02225	16.7613	12.6521	19.224	7.16935	7.94734	8.10028	12.7383	11.7731	6.71991	0	0	0	0.438967	0	0.234428	0.220672	0	0	0.202782	0	0.405007	0.658464	0	0	0.195568	0.223167	0.432803	BraA01g000370.3C	protein_coding	chrA01:167300-167801:+	gi|685256081|ref|XP_009113224.1|	362	3e-41	PREDICTED: uncharacterized protein LOC103838228 [Brassica rapa]	gi|923812022|ref|XM_013835731.1|	426	0	PREDICTED: Brassica napus uncharacterized LOC106395219 (LOC106395219), mRNA	.	.
BraA01g000380.3C	0	0	0	0	0	0	0	0	0	0	0.240605	0	0	0	0	0.313816	0	0	0	0	0	0	0	0	0	0	0	0	0	0	0	0	0	0	0	0	BraA01g000380.3C	protein_coding	chrA01:168423-168815:-	gi|685256083|ref|XP_009114168.1|	675	7e-89	PREDICTED: egg cell-secreted protein 1.4 [Brassica rapa]	gi|685256082|ref|XM_009115920.1|	393	0	PREDICTED: Brassica rapa egg cell-secreted protein 1.4 (LOC103839108), mRNA	Q9T039	211
BraA01g000390.3C	2.40727	0.876401	2.82861	31.9261	32.1751	32.2575	6.76073	7.92163	9.48629	27.5018	25.9339	26.4034	22.5465	24.1114	24.1286	8.70239	8.12101	12.5037	11.2704	3.85772	4.35726	24.0318	31.6024	29.7176	28.8742	19.9121	17.3117	14.7561	16.3472	13.9095	30.8986	34.3941	35.0742	34.8197	34.3304	39.8829	BraA01g000390.3C	protein_coding	chrA01:172682-177321:+	gi|685256085|ref|XP_009115076.1|	5149	0	PREDICTED: cellulose synthase A catalytic subunit 2 [UDP-forming] [Brassica rapa]	gi|685256084|ref|XM_009116828.1|	2849	0	PREDICTED: Brassica rapa cellulose synthase A catalytic subunit 2 [UDP-forming] (LOC103840033), mRNA	O48947	1860
BraA01g000400.3C	0.508229	0.248631	0.518766	0	0.288916	0	0	0	0.86119	0.261982	0	0.258016	0.53652	0	0	0	0	0	0.257723	0	0.267273	0	0	0	0	0	1.05124	0.751177	0	0.250048	0	0	0	1.69039	0.551124	0.801626	BraA01g000400.3C	protein_coding	chrA01:180669-181013:+	gi|685256090|ref|XP_009117383.1|	438	1e-53	PREDICTED: uncharacterized protein LOC103842210 [Brassica rapa]	gi|923813946|ref|XM_013836297.1|	345	5e-180	PREDICTED: Brassica napus uncharacterized LOC106395997 (LOC106395997), mRNA	.	.
BraA01g000420.3C	8.52343	7.65873	8.07869	15.8911	17.0082	15.86	9.57154	11.5666	11.1023	19.2783	21.3881	19.6929	15.7922	16.8868	14.378	27.529	22.39	22.4925	14.5544	9.69494	9.6966	16.7892	14.4485	16.6444	13.243	9.84289	9.53464	15.9402	15.641	13.4363	11.966	10.5764	12.5255	11.819	10.8462	13.5354	BraA01g000420.3C	protein_coding	chrA01:185758-187033:+	gi|685256094|ref|XP_009119734.1|	1527	0	PREDICTED: UDP-galactose transporter 2-like [Brassica rapa]	gi|685256093|ref|XM_009121486.1|	1008	0	PREDICTED: Brassica rapa UDP-galactose transporter 2-like (LOC103844394), mRNA	Q8RWW7	563
BraA01g000430.3C	4.86646	3.44547	5.36673	4.15219	4.55979	4.66626	2.1911	2.54971	2.21003	4.3364	4.45753	4.64321	5.18898	5.53506	4.45176	6.63951	6.22881	7.50606	4.86115	6.19532	5.76146	4.40767	3.26071	3.17567	4.53643	4.92886	4.72946	5.68673	5.68995	5.7511	3.6514	3.41338	3.66557	2.81192	2.4397	2.52003	BraA01g000430.3C	protein_coding	chrA01:192597-196181:+	gi|685256096|ref|XP_009120729.1|	5842	0	PREDICTED: protein BRASSINOSTEROID INSENSITIVE 1-like [Brassica rapa]	gi|685256095|ref|XM_009122481.1|	3585	0	PREDICTED: Brassica rapa protein BRASSINOSTEROID INSENSITIVE 1-like (LOC103845289), mRNA	O22476	2008
BraA01g000440.3C	0.343802	0	0.35093	0.317255	0.390886	0.484745	0	0	0	0.354446	0.556222	0.698161	0.907351	1.29079	0.676611	3.62735	2.34144	1.12262	0.348684	0.348396	0	1.65	2.44239	0.783266	0.552978	0.370556	0.355565	1.0163	0.159351	0.16915	0.366674	0.727093	0.673641	0.326713	0.372819	1.62683	BraA01g000440.3C	protein_coding	chrA01:205578-206412:-	gi|685256099|ref|XP_009121710.1|	788	6e-103	PREDICTED: probable WRKY transcription factor 13 [Brassica rapa]	gi|923519988|ref|XM_013809599.1|	480	0	PREDICTED: Brassica napus probable WRKY transcription factor 13 (LOC106369443), mRNA	Q9SVB7	188
BraA01g000450.3C	6.43395	3.50337	6.58637	5.2746	4.57988	5.48677	3.7687	4.53368	3.8237	6.9023	6.89924	6.58953	4.41979	4.48112	4.55104	4.89279	4.22938	4.89597	4.12323	5.15924	5.1685	4.45523	4.45351	4.15313	4.53934	6.43211	5.56435	6.48671	5.90371	6.11995	3.23209	3.58906	3.45311	5.29892	5.74337	4.77505	BraA01g000450.3C	protein_coding	chrA01:213419-228208:+	gi|685256101|ref|XP_009122821.1|	15509	0	PREDICTED: uncharacterized protein LOC103847160 [Brassica rapa]	gi|685256100|ref|XM_009124573.1|	9402	0	PREDICTED: Brassica rapa uncharacterized LOC103847160 (LOC103847160), mRNA	Q3UHA3	81.6
BraA01g000460.3C	0	0	0	0	0	0	0.0564692	0.123377	0	0.0597775	0.375229	0.117745	0	0	0.114111	0.163135	0	0.0757324	0	0	0	0	0.0633708	0	0	0	0.0599663	0	0.107499	0.228218	0	0	0	0.110201	0.628763	0.12194	BraA01g000460.3C	protein_coding	chrA01:229565-231076:-	gi|685256103|ref|XP_009123569.1|	2585	0	PREDICTED: cytochrome P450 86B1-like [Brassica rapa]	gi|923519991|ref|XM_013809604.1|	1512	0	PREDICTED: Brassica napus alkane hydroxylase MAH1-like (LOC106369450), mRNA	Q9FVS9	565
BraA01g000470.3C	20.7722	23.8787	16.6881	22.5937	25.0537	27.1719	20.9223	23.8644	24.09	26.0565	26.6636	24.78	37.27	40.498	37.6937	34.2212	33.3496	37.1375	30.7596	28.8933	30.321	27.5446	30.7304	25.1015	27.6091	27.326	29.6512	38.8345	42.4648	37.8484	31.3358	29.7322	30.4094	50.8127	56.0136	48.1698	BraA01g000470.3C	protein_coding	chrA01:231882-234617:-	gi|685256105|ref|XP_009124356.1|	1760	0	PREDICTED: developmentally-regulated G-protein 3 [Brassica rapa]	gi|923503423|ref|XM_013792951.1|	1110	0	PREDICTED: Brassica napus developmentally-regulated G-protein 3 (LOC106352938), mRNA	Q9SVA6	671
BraA01g000480.3C	28.1481	22.3768	25.3397	72.4223	69.4509	72.393	47.8784	49.1839	48.1383	25.0898	29.3055	23.3207	65.6206	69.6153	67.8987	70.808	80.1413	110.933	15.8599	18.818	19.9427	38.8802	38.1344	37.1855	27.9818	34.1308	30.6273	14.9272	13.0465	11.9254	31.2715	23.4603	26.5232	31.3	26.9203	26.5153	BraA01g000480.3C	protein_coding	chrA01:235870-237565:+	gi|685256111|ref|XP_009125168.1|	1582	0	PREDICTED: shikimate kinase 2, chloroplastic [Brassica rapa]	gi|685256110|ref|XM_009126920.1|	886	0	PREDICTED: Brassica rapa shikimate kinase 2, chloroplastic (LOC103850170), mRNA	Q8GY88	482
BraA01g000490.3C	6.39257	6.47801	4.19471	6.88213	7.87371	5.29349	6.00339	6.96306	5.24414	4.31519	3.69366	4.48168	6.82876	6.77571	7.93785	7.27988	8.39624	8.34949	6.02024	6.32375	5.4429	6.89888	6.15489	5.98158	6.0386	6.808	5.74552	4.27427	4.16221	4.26839	5.51921	6.11591	5.59175	8.89527	5.77676	6.96203	BraA01g000490.3C	protein_coding	chrA01:239506-240657:-	gi|685256109|ref|XP_009125062.1|	2035	0	PREDICTED: F-box/kelch-repeat protein At4g39590-like [Brassica rapa]	gi|685256108|ref|XM_009126814.1|	1152	0	PREDICTED: Brassica rapa F-box/kelch-repeat protein At4g39590-like (LOC103850073), mRNA	.	.
BraA01g000500.3C	0	0	0	0	0	0	0	0	0	0	0	0.0960254	0	0.202899	0	0	0	0	0.479581	0.191674	0	0	0.310086	0.107731	0	0	0.0978091	0	0.175337	0.27918	0.100865	0	0	0.0898725	0.102555	0	BraA01g000500.3C	protein_coding	chrA01:245080-246006:-	gi|685256113|ref|XP_009125280.1|	1486	0	PREDICTED: F-box/kelch-repeat protein At4g39590-like [Brassica rapa]	gi|685256112|ref|XM_009127032.1|	927	0	PREDICTED: Brassica rapa F-box/kelch-repeat protein At4g39590-like (LOC103850272), mRNA	.	.
BraA01g000510.3C	0	0	0	0	0	0	0	0	0	0	0	0	0	0	0	0	0	0	0	0	0	0	0	0	0	0	0.116242	0	0	0	0	0	0	0.21362	0	0	BraA01g000510.3C	protein_coding	chrA01:247470-248864:-	gi|923521425|ref|XP_013669375.1|	676	7e-84	PREDICTED: F-box/kelch-repeat protein At4g39590-like [Brassica napus]	gi|199580329|gb|AC189635.2|	440	0	Brassica rapa subsp. pekinensis clone KBrS004J05, complete sequence	.	.
BraA01g000520.3C	51.5334	138.351	55.4884	32.766	29.6527	34.2623	108.334	122.023	110.751	85.5243	72.8671	79.763	47.1042	64.7181	68.0249	35.3634	39.3764	95.628	26.7699	45.5349	48.5833	43.2312	26.1006	26.1299	43.8022	61.3011	69.2205	40.2512	29.7112	30.9199	41.2213	44.5247	44.3299	38.2219	36.4601	32.0507	BraA01g000520.3C	protein_coding	chrA01:257165-257551:+	gi|674890780|emb|CDY41988.1|	413	2e-50	BnaA01g05600D [Brassica napus]	gi|199580329|gb|AC189635.2|	173	2e-84	Brassica rapa subsp. pekinensis clone KBrS004J05, complete sequence	.	.
BraA01g000530.3C	26.3296	16.7063	25.4108	24.2965	26.428	25.1536	19.9596	23.3309	20.2072	39.9897	39.3088	39.9671	34.7377	33.1692	32.5681	31.2866	29.5439	33.64	25.418	25.0577	23.3918	21.2964	19.8899	19.5592	27.6685	30.6209	29.3327	28.4888	31.4568	32.0264	27.0865	24.529	25.6777	24.1118	26.0104	27.8371	BraA01g000530.3C	protein_coding	chrA01:258561-262619:+	gi|923503442|ref|XP_013652959.1|	6088	0	PREDICTED: coatomer subunit alpha-2-like [Brassica napus]	gi|923503441|ref|XM_013797505.1|	3666	0	PREDICTED: Brassica napus coatomer subunit alpha-2-like (LOC106357497), mRNA	Q9SJT9	2212
BraA01g000540.3C	1.48593	2.12021	1.13755	1.77112	1.68942	2.03689	1.38685	1.1198	1.53871	1.21277	1.40234	1.44587	2.09152	2.12528	2.37602	5.31293	3.20459	2.83034	2.95125	2.44689	2.08382	1.51872	2.16535	2.18634	1.59333	2.06868	1.79289	0.915099	1.37744	1.40122	1.05652	1.63673	1.45575	2.58879	2.68556	2.99477	BraA01g000540.3C	protein_coding	chrA01:264939-267184:+	gi|685256123|ref|XP_009125746.1|	2445	0	PREDICTED: pentatricopeptide repeat-containing protein At4g39620, chloroplastic [Brassica rapa]	gi|923503445|ref|XM_013798471.1|	1416	0	PREDICTED: Brassica napus pentatricopeptide repeat-containing protein At4g39620, chloroplastic (LOC106358406), mRNA	Q9SV96	845
BraA01g000550.3C	0	0	0	0.0469803	0	0.143566	0	0	0	0	0	0	0	0.054613	0.0500975	0.0716201	0.0693457	0.0664967	0.0516343	0	0	0.0542974	0	0	0	0	0.0526533	0	0	0	0.0542984	0	0	0	0	0	BraA01g000550.3C	protein_coding	chrA01:268863-271567:+	gi|685256126|ref|XP_009126030.1|	2934	0	PREDICTED: gamma-glutamyltranspeptidase 1-like [Brassica rapa]	gi|685256125|ref|XM_009127782.1|	1716	0	PREDICTED: Brassica rapa gamma-glutamyltranspeptidase 1-like (LOC103850940), mRNA	Q8VYW6	964
BraA01g000570.3C	38.0973	25.1994	41.6982	34.6849	36.0666	38.3989	24.5366	22.8977	27.1358	50.7389	45.4911	51.5244	52.3318	54.0518	52.4433	27.6218	29.9401	38.9019	40.3968	36.1772	38.3534	36.1708	28.5945	27.1307	42.3821	51.561	45.8356	43.7203	44.6766	38.993	51.7823	52.0956	47.9661	36.2036	38.2156	36.1991	BraA01g000570.3C	protein_coding	chrA01:273972-276432:+	gi|685256130|ref|XP_009126207.1|	2939	0	PREDICTED: gamma-glutamyltranspeptidase 1 isoform X2 [Brassica rapa]	gi|685256131|ref|XM_009128031.1|	1719	0	PREDICTED: Brassica rapa gamma-glutamyltranspeptidase 1 (LOC103851034), transcript variant X3, mRNA	Q8VYW6	1027
BraA01g000580.3C	269.196	334.24	270.337	388.162	402.256	409.269	172.255	197.3	187.416	78.1304	72.6859	75.2682	113.957	103.178	107.307	44.0402	49.1505	75.1379	141.853	230.639	228.493	181.12	156.012	165.467	119.561	115.754	109.044	84.9969	84.8467	83.9757	129.504	126.91	124.182	37.6097	45.7075	48.767	BraA01g000580.3C	protein_coding	chrA01:281916-284111:+	gi|685256134|ref|XP_009126368.1|	2478	0	PREDICTED: alanine--glyoxylate aminotransferase 2 homolog 1, mitochondrial-like [Brassica rapa]	gi|685256133|ref|XM_009128120.1|	1431	0	PREDICTED: Brassica rapa alanine--glyoxylate aminotransferase 2 homolog 1, mitochondrial-like (LOC103851253), mRNA	Q940M2	870
BraA01g000590.3C	8.64925	10.6158	6.73896	9.53988	9.83377	9.62133	11.0154	10.291	10.6379	9.18082	7.34161	8.41828	7.61793	7.90559	7.80591	15.6952	15.0574	12.2997	16.9731	13.4843	16.4179	15.5015	18.4586	22.0371	13.4452	11.7494	11.2741	14.0698	13.6634	12.7914	13.8097	13.4754	12.2341	10.8456	12.5427	12.4853	BraA01g000590.3C	protein_coding	chrA01:288136-290167:-	gi|685256136|ref|XP_009126479.1|	2697	0	PREDICTED: apoptotic chromatin condensation inducer in the nucleus-like [Brassica rapa]	gi|685256135|ref|XM_009128231.1|	1713	0	PREDICTED: Brassica rapa apoptotic chromatin condensation inducer in the nucleus-like (LOC103851344), mRNA	Q9JIX8	90.9
BraA01g000610.3C	0.405878	0.397119	0.414292	0.249692	0.153821	0.254342	0.790569	0.575757	0.917008	0.418443	0.875535	1.3737	0.428471	0.435387	1.19817	2.09356	3.68559	3.35747	1.92099	1.0968	1.56528	1.29861	1.62652	2.00349	1.45071	1.16656	0.559686	0.933175	1.63039	2.66255	1.01005	0.715311	1.06036	4.24273	4.10792	2.41848	BraA01g000610.3C	protein_coding	chrA01:307697-308925:+	gi|685256138|ref|XP_009126581.1|	608	1e-77	PREDICTED: uncharacterized protein LOC103851449 [Brassica rapa]	gi|685256139|ref|XM_009128406.1|	496	0	PREDICTED: Brassica rapa uncharacterized LOC103851449 (LOC103851449), transcript variant X2, mRNA	.	.
BraA01g000620.3C	1.28656	0	1.31323	2.03522	0.417929	1.90036	5.01191	2.73756	4.36011	9.85314	8.12761	5.78508	1.35817	3.54881	0.904276	2.06842	2.50342	2.88069	4.10087	1.48999	1.54648	2.94025	1.20524	2.09363	3.35033	1.78286	2.28098	6.70075	7.32612	6.32983	2.94031	3.88697	2.70092	3.49316	1.99306	2.51243	BraA01g000620.3C	protein_coding	chrA01:310974-311725:+	gi|685256144|ref|XP_009126827.1|	827	4e-111	PREDICTED: heavy metal-associated isoprenylated plant protein 26 [Brassica rapa]	gi|923520002|ref|XM_013809641.1|	477	0	PREDICTED: Brassica napus heavy metal-associated isoprenylated plant protein 26-like (LOC106369490), mRNA	O65657	288
BraA01g000630.3C	0.893285	1.24858	0.911804	0.706551	0.870533	2.03918	1.49138	1.90075	1.15327	0.789377	1.51403	0.777428	2.15545	2.32713	1.50686	1.97471	1.73818	2.16681	3.2356	0.646586	0.40266	1.49709	1.81313	1.74439	0.547344	0.55017	0.659891	1.00594	0.946362	0.627849	2.99424	0.944586	2.50041	1.33396	2.62927	1.47606	BraA01g000630.3C	protein_coding	chrA01:312768-314037:-	gi|685256146|ref|XP_009126909.1|	918	8e-123	PREDICTED: peptidyl-prolyl cis-trans isomerase FKBP16-2, chloroplastic [Brassica rapa]	gi|923503466|ref|XM_013803918.1|	591	0	PREDICTED: Brassica napus photosynthetic NDH subunit of lumenal location 4, chloroplastic-like (LOC106363957), mRNA	Q9SCY3	312
BraA01g000640.3C	2.71143	0.786051	3.07516	5.56014	4.45288	5.09732	9.68244	11.0047	9.75621	6.72959	6.3905	5.71005	10.2833	8.29479	11.6605	6.78102	6.42889	6.95176	2.74993	2.44236	3.48557	9.63918	7.6829	6.86367	6.13787	4.22128	4.46594	3.66123	5.02694	4.94081	11.0317	11.8933	13.6754	8.58885	9.90982	12.9885	BraA01g000640.3C	protein_coding	chrA01:316109-316981:-	gi|685256148|ref|XP_009127014.1|	1100	3e-148	PREDICTED: uncharacterized protein LOC103851859 [Brassica rapa]	gi|923520004|ref|XM_013809648.1|	873	0	PREDICTED: Brassica napus uncharacterized LOC106369498 (LOC106369498), mRNA	.	.
BraA01g000650.3C	0	0.105898	0	0	0	0	0	0	0	0	0	0	0.114259	0	0	0	0	0.141367	0	0	0	0	0	0	0	0	0.335811	0	0	0	0	0	0	0.102854	0	0	BraA01g000650.3C	protein_coding	chrA01:326775-328122:-	gi|923520007|ref|XP_013665111.1|	1359	0	PREDICTED: protein SCO1 homolog 2, mitochondrial-like [Brassica napus]	gi|923520006|ref|XM_013809657.1|	810	0	PREDICTED: Brassica napus protein SCO1 homolog 2, mitochondrial-like (LOC106369505), mRNA	Q8LAL0	392
BraA01g000660.3C	1.6892	2.14858	1.72422	2.72785	2.68875	2.77865	5.92242	7.63794	5.15221	24.7292	27.9665	27.0991	7.57874	8.51647	8.31098	2.73274	1.72562	1.87536	1.8845	0.855885	1.15484	1.44123	2.67696	2.40526	2.08299	0.72826	1.48495	3.91147	5.55885	3.82298	3.423	4.37622	3.64078	2.08681	2.83925	2.48674	BraA01g000660.3C	protein_coding	chrA01:335385-337421:-	gi|685256152|ref|XP_009127222.1|	1867	0	PREDICTED: probable trehalose-phosphate phosphatase H [Brassica rapa]	gi|923503468|ref|XM_013804789.1|	1038	0	PREDICTED: Brassica napus probable trehalose-phosphate phosphatase H (LOC106365006), mRNA	Q8GWG2	657
BraA01g000670.3C	49.479	20.3348	49.5356	60.5534	64.8913	58.4086	35.0362	36.9275	31.7013	18.7076	19.1164	19.3885	34.7479	39.8355	36.3343	11.4277	11.2085	30.866	103.038	145.395	156.789	167.76	147.011	157.431	125.907	103.816	107.581	33.3691	36.5759	33.0117	119.831	123.494	112.555	116.195	103.764	99.5087	BraA01g000670.3C	protein_coding	chrA01:350105-350935:-	gi|685256155|ref|XP_009127404.1|	1245	1e-170	PREDICTED: ethylene-responsive transcription factor ERF060 [Brassica rapa]	gi|685256154|ref|XM_009129156.1|	831	0	PREDICTED: Brassica rapa ethylene-responsive transcription factor ERF060 (LOC103852206), mRNA	O65665	363
BraA01g000680.3C	2.7229	4.12754	2.11387	4.24672	4.57829	4.32581	3.24943	4.52899	4.24567	1.22567	1.69592	0.934546	1.90282	1.27531	1.66045	1.67245	3.08197	2.20399	1.08906	1.36021	1.08908	1.92235	1.88616	2.27168	0.863575	0.8267	0.872581	1.05809	0.888767	1.16984	0.981647	1.45991	0.713865	0.911109	1.20604	1.2098	BraA01g000680.3C	protein_coding	chrA01:354450-359518:-	gi|685256158|ref|XP_009127547.1|	2827	0	PREDICTED: uncharacterized protein LOC103852362 [Brassica rapa]	gi|685256157|ref|XM_009129299.1|	1895	0	PREDICTED: Brassica rapa uncharacterized LOC103852362 (LOC103852362), mRNA	Q93YU8	89
BraA01g000690.3C	21.7976	40.5452	22.983	28.514	31.0466	31.972	43.1573	39.2459	45.4595	34.8199	31.5193	34.7793	16.4364	20.8129	14.378	7.41326	7.83038	9.38585	40.5702	47.8187	47.8681	49.3047	42.4107	46.9317	44.9484	41.3079	44.0959	16.7578	18.2078	24.0415	50.583	47.6186	48.342	21.397	22.3386	25.9433	BraA01g000690.3C	protein_coding	chrA01:362730-363409:+	gi|685256160|ref|XP_009127647.1|	646	1e-84	PREDICTED: uncharacterized protein LOC103852462 [Brassica rapa]	gi|685256159|ref|XM_009129399.1|	366	0	PREDICTED: Brassica rapa uncharacterized LOC103852462 (LOC103852462), mRNA	Q8LGS1	47.8
BraA01g000700.3C	11.552	21.0388	10.9743	25.5946	26.5933	27.8989	33.6402	35.5324	46.1914	29.4793	28.8053	34.5494	35.0156	31.3478	32.9203	18.9862	17.6043	24.724	58.5222	47.405	44.7512	35.6801	29.3763	32.1162	14.4719	17.3204	16.4423	40.2343	35.3596	36.071	22.7503	21.2258	24.0355	3.20639	2.35657	3.6081	BraA01g000700.3C	protein_coding	chrA01:365090-367609:-	gi|685256162|ref|XP_009127742.1|	2708	0	PREDICTED: inositol-3-phosphate synthase [Brassica rapa]	gi|685256161|ref|XM_009129494.1|	1533	0	PREDICTED: Brassica rapa inositol-3-phosphate synthase (LOC103852564), mRNA	Q96348	1038
BraA01g000720.3C	37.2738	27.2281	37.5289	58.0281	56.7209	54.9378	34.8194	33.856	39.8153	152.731	161.972	153.895	108.61	112.811	115.523	101.303	89.711	109.54	58.6976	33.4679	41.4708	64.0235	57.781	57.4791	91.3554	82.1935	81.9496	166.337	172.998	168.79	84.51	83.8562	80.6726	117.468	123.528	113.317	BraA01g000720.3C	protein_coding	chrA01:379766-381148:+	gi|685256174|ref|XP_009128353.1|	1561	0	PREDICTED: uncharacterized protein LOC103853165 [Brassica rapa]	gi|685256173|ref|XM_009130105.1|	1374	0	PREDICTED: Brassica rapa uncharacterized LOC103853165 (LOC103853165), mRNA	.	.
BraA01g000730.3C	12.9274	26.2767	14.961	38.6439	36.227	35.4272	25.2687	28.8632	31.1611	29.6586	27.6898	29.0248	39.98	38.7698	36.908	68.2604	68.8207	61.4749	56.5063	47.6032	47.3972	51.9445	42.2867	44.6962	24.8926	23.6475	21.561	35.4332	31.3092	34.7574	30.4876	26.0881	29.7	19.2924	18.3622	26.5169	BraA01g000730.3C	protein_coding	chrA01:382337-384095:+	gi|685256177|ref|XP_009128515.1|	1397	0	PREDICTED: uncharacterized protein LOC103853308 [Brassica rapa]	gi|685256176|ref|XM_009130267.1|	618	0	PREDICTED: Brassica rapa uncharacterized LOC103853308 (LOC103853308), mRNA	Q9SIE0	50.8
BraA01g000740.3C	0	0.0992798	0.103573	0.0936344	0	0.0953781	0.592927	0.755681	0.57313	1.04611	2.0794	1.23633	1.39253	1.41501	0.998472	0.142743	0.13821	0.530127	0.41164	0.308475	0.747065	0.541088	0.332697	0.346758	1.74086	0.656193	0.839528	2.79952	1.78716	2.1966	0.757538	0.96567	1.49113	0.289277	0.3301	0.213396	BraA01g000740.3C	protein_coding	chrA01:384921-386454:+	gi|674870890|emb|CDY63901.1|	1451	0	BnaA01g34660D [Brassica napus]	gi|685256178|ref|XM_009130341.1|	853	0	PREDICTED: Brassica rapa TLD domain-containing protein 2-like (LOC103853399), mRNA	Q8N573	92.8
BraA01g000750.3C	30.0349	55.7555	36.1263	70.5629	66.8198	71.4191	58.0278	55.1	60.7059	52.8912	56.9098	61.4867	81.0668	69.4877	75.2448	140.687	134.893	120.233	107.356	106.28	95.9658	95.4047	103.269	98.5718	74.5087	71.0438	74.3822	72.1478	80.0649	73.1667	64.5856	64.0347	68.8705	83.7747	93.4845	98.3327	BraA01g000750.3C	protein_coding	chrA01:387120-387659:+	gi|685256181|ref|XP_009128651.1|	740	3e-97	PREDICTED: uncharacterized protein LOC103853478 [Brassica rapa]	gi|685256180|ref|XM_009130403.1|	540	0	PREDICTED: Brassica rapa uncharacterized LOC103853478 (LOC103853478), mRNA	B4F1I6	55.1
BraA01g000760.3C	4.47674	10.342	2.7925	11.9342	12.0177	12.5071	10.052	8.99651	11.0977	12.3076	11.1323	9.21721	8.92679	11.6054	8.56561	21.5171	24.3908	20.4651	24.3411	19.1544	14.3872	26.2596	36.0162	39.6632	12.8009	7.50573	7.58791	18.3799	15.2163	15.2955	18.4351	16.5684	20.2236	8.2721	6.47278	9.28408	BraA01g000760.3C	protein_coding	chrA01:388273-390212:-	gi|685256185|ref|XP_009128801.1|	1218	5e-168	PREDICTED: uncharacterized protein LOC103853564 isoform X2 [Brassica rapa]	gi|685256184|ref|XM_009130553.1|	705	0	PREDICTED: Brassica rapa uncharacterized LOC103853564 (LOC103853564), transcript variant X2, mRNA	.	.
BraA01g000770.3C	56.8229	43.6831	46.4007	44.1954	44.3004	40.0588	20.1595	23.3182	24.7592	43.9365	40.2746	39.9746	44.561	33.9602	41.137	53.1003	63.5765	55.1332	2.0582	2.4678	1.28068	1.73148	2.21798	2.31172	4.35214	0.437462	0.419764	5.59905	6.77241	6.39011	5.62743	8.15455	3.57872	9.25687	11.4435	17.4984	BraA01g000770.3C	protein_coding	chrA01:392146-392454:+	gi|674876078|emb|CDY56500.1|	186	4e-16	BnaAnng14350D [Brassica napus]	.	.	.	.	.	.
BraA01g000780.3C	28.4376	30.8984	28.3055	30.0838	30.8138	33.7454	26.7008	23.151	27.3328	28.5891	29.3163	26.3218	31.6792	29.5782	31.1523	34.4793	34.1333	45.2489	37.3663	39.9625	39.9903	39.3773	40.3529	35.6154	30.9985	30.1425	31.6042	33.2847	32.1143	39.6547	38.2889	35.8855	33.7092	33.8174	36.7157	37.0069	BraA01g000780.3C	protein_coding	chrA01:392849-394848:-	gi|923503501|ref|XP_013673415.1|	1970	0	PREDICTED: ubiquitin carboxyl-terminal hydrolase 3-like [Brassica napus]	gi|923503500|ref|XM_013817961.1|	1116	0	PREDICTED: Brassica napus ubiquitin carboxyl-terminal hydrolase 3-like (LOC106377440), mRNA	O24454	734
BraA01g000790.3C	37.9703	38.1235	37.8443	103.923	108.604	105.297	212.195	236.777	228.391	182.407	191.903	192.161	223.085	229.564	224.179	82.919	95.8555	170.593	105.548	93.6758	95.7637	145.339	87.669	88.6569	182.364	297.188	304.389	181.194	168.896	178.988	234.603	212.526	199.142	127.14	132.148	123.334	BraA01g000790.3C	protein_coding	chrA01:395985-397540:+	gi|685256189|ref|XP_009128991.1|	1558	0	PREDICTED: adenylyl-sulfate kinase 2, chloroplastic [Brassica rapa]	gi|685256188|ref|XM_009130743.1|	882	0	PREDICTED: Brassica rapa adenylyl-sulfate kinase 2, chloroplastic (LOC103853800), mRNA	O49196	543
BraA01g000800.3C	0	0	0	0	0	0	0	0	0	0	0	0	0	0	0	0	0	0	0	0	0	0	0.221798	0	0	0	0	0	0	0	0	0	0	0	0	0	BraA01g000800.3C	protein_coding	chrA01:402732-403163:+	gi|923893637|ref|XP_013717733.1|	713	2e-86	PREDICTED: uncharacterized protein LOC106421434 [Brassica napus]	gi|923893636|ref|XM_013862279.1|	356	0	PREDICTED: Brassica napus uncharacterized LOC106421434 (LOC106421434), mRNA	P0C2F6	87.8
BraA01g000820.3C	0	0	0	0	0	0	0	0	0	0	0	0	0.0985621	0.100153	0	0	0	0	0	0	0	0	0	0	0	0.10063	0.193118	0	0	0	0	0.197453	0.0914689	0	0	0	BraA01g000820.3C	protein_coding	chrA01:405445-408137:-	gi|922504688|ref|XP_013589418.1|	787	5e-100	PREDICTED: uncharacterized protein LOC106297796 [Brassica oleracea var. oleracea]	gi|922415275|ref|XM_013739216.1|	39	2e-09	PREDICTED: Brassica oleracea var. oleracea cytochrome P450 79B1 (LOC106302779), mRNA	.	.
BraA01g000830.3C	48.5613	45.9278	50.9464	210.849	207.52	207.921	275.346	302.346	294.304	204.881	188.591	190.536	367.918	372.292	354.586	132.828	149.874	329.059	88.8048	117.962	123.627	267.423	167.31	168.721	274.373	444.804	448.764	212.903	205.25	203.149	303.78	303.645	287.197	190.185	199.686	216.523	BraA01g000830.3C	protein_coding	chrA01:408320-410126:+	gi|237682408|gb|ACR10253.1|	2693	0	cytochrome P450 79b2 [Brassica rapa subsp. pekinensis]	gi|685256190|ref|XM_009130809.1|	1620	0	PREDICTED: Brassica rapa cytochrome P450 79B1 (LOC103853878), mRNA	O81345	1008
BraA01g000840.3C	4.1905	7.49881	3.54571	8.14089	7.27196	6.73765	10.9009	8.56466	9.77911	8.46991	8.56372	9.62935	10.1281	9.58179	10.3087	34.8271	30.4917	20.0208	8.89143	8.15772	7.53911	9.2324	9.88298	7.59989	8.92764	8.6766	7.81237	8.5842	9.71137	9.1692	7.93884	7.22977	5.50988	10.4271	10.9419	9.56657	BraA01g000840.3C	protein_coding	chrA01:411199-416511:+	gi|685256195|ref|XP_009129251.1|	2094	0	PREDICTED: dnaJ homolog 1, mitochondrial isoform X1 [Brassica rapa]	gi|685256194|ref|XM_009131003.1|	1362	0	PREDICTED: Brassica rapa dnaJ homolog 1, mitochondrial (LOC103854064), transcript variant X1, mRNA	Q9SJZ7	680
BraA01g000850.3C	712.562	327.245	709.115	394.213	399.28	389.91	453.997	478.884	469.487	252.575	256.709	264.417	517.197	544.933	532.512	312.245	322.807	487.667	349.147	413.222	440.318	481.853	440.56	432.69	677.908	697.248	686.86	256.826	258.526	251.874	544.497	524.491	528.464	491.738	527.428	535.655	BraA01g000850.3C	protein_coding	chrA01:422670-424598:+	gi|923929549|ref|XP_013733571.1|	2635	0	PREDICTED: phospho-2-dehydro-3-deoxyheptonate aldolase 1, chloroplastic-like isoform X1 [Brassica napus]	gi|685256199|ref|XM_009131224.1|	1551	0	PREDICTED: Brassica rapa phospho-2-dehydro-3-deoxyheptonate aldolase 1, chloroplastic (LOC103854257), mRNA	P29976	964
BraA01g000860.3C	62.3602	32.422	72.3088	105.218	104.867	96.6317	66.069	60.0998	64.4034	78.9512	79.9238	78.0211	93.7893	92.2242	95.6393	96.9019	82.6297	62.0248	37.3123	31.5967	30.0503	40.628	41.7772	37.3013	40.9879	39.5122	34.1358	36.1224	45.7137	41.9779	43.5507	44.6967	42.9446	41.9039	38.9047	36.2163	BraA01g000860.3C	protein_coding	chrA01:425722-426597:+	gi|685256202|ref|XP_009129562.1|	1119	2e-153	PREDICTED: ras-related protein RABA4b [Brassica rapa]	gi|685256203|ref|XM_009131360.1|	672	0	PREDICTED: Brassica rapa ras-related protein RABA4b (LOC103854349), transcript variant X2, mRNA	Q9SMQ6	407
BraA01g000870.3C	0.107045	0.418939	0.218528	0.592675	0.365113	0.704331	1.04251	0.341658	0.241848	0.441434	0.692731	0.326064	0.226007	0.574136	0.105333	2.86113	1.45804	1.11851	1.5199	1.19322	1.12587	2.85409	1.5209	2.19487	0.459127	0.692247	0	1.05477	0.496147	0.842652	1.02749	0.339576	0.943838	0.813791	0.812555	1.35072	BraA01g000870.3C	protein_coding	chrA01:426946-428742:-	gi|674859203|emb|CDY69835.1|	364	1e-40	BnaAnng31670D [Brassica napus]	gi|923508151|ref|XM_013880813.1|	145	2e-68	PREDICTED: Brassica napus tRNA (cytosine(34)-C(5))-methyltransferase-like (LOC106439372), transcript variant X2, mRNA	.	.
BraA01g000880.3C	21.4135	14.5428	18.6003	17.1254	16.8036	15.9446	12.5128	13.0439	9.39143	11.4278	11.5027	10.0611	3.81192	3.96352	4.54477	1.18132	1.71571	1.20649	13.5416	12.5943	15.4565	15.046	13.9503	17.1227	13.4166	10.5896	10.248	12.2462	11.1317	11.8988	7.52314	8.16935	8.14467	1.67581	3.64249	3.09056	BraA01g000880.3C	protein_coding	chrA01:435046-437509:-	gi|685256209|ref|XP_009129882.1|	1587	0	PREDICTED: serine/threonine-protein kinase SRK2F [Brassica rapa]	gi|953067422|gb|KT236166.1|	1044	0	Brassica rapa subsp. chinensis cultivar suzhouqing sucrose non-fermenting 1-related protein kinase 2 (SnRK2.7) mRNA, complete cds	Q9SMQ4	559
BraA01g000890.3C	3.13639	3.5071	3.8112	1.3782	1.18864	1.07629	3.1515	3.33684	3.65553	1.53976	0.859128	1.567	2.57521	3.25761	2.74333	1.19058	0.813719	1.75565	3.43338	5.09536	6.23106	4.35378	2.82934	2.32511	4.59088	4.82922	4.73683	3.28667	3.64579	2.98822	4.03529	4.63258	3.17025	5.10941	5.18263	5.07787	BraA01g000890.3C	protein_coding	chrA01:439420-441180:-	gi|685256211|ref|XP_009129984.1|	2292	0	PREDICTED: calponin homology domain-containing protein DDB_G0272472 [Brassica rapa]	gi|685256210|ref|XM_009131736.1|	1761	0	PREDICTED: Brassica rapa calponin homology domain-containing protein DDB_G0272472 (LOC103854741), mRNA	.	.
BraA01g000900.3C	848.113	1221.13	898.572	1046.19	1043.81	1062.06	1880.05	1018.06	1000.49	699.099	686.982	719.055	720.807	736.331	744.297	823.399	884.994	912.158	2672.84	2905.81	2838.74	3045.46	3231.89	3200.83	2959.26	2481.85	2456.67	2343.12	2348.89	2422.81	3092.84	3029.47	2978.75	2702.26	2946.91	2930.92	BraA01g000900.3C	protein_coding	chrA01:442092-442774:-	gi|565461548|ref|XP_006288773.1|	704	1e-92	hypothetical protein CARUB_v10002094mg, partial [Capsella rubella]	gi|923507466|ref|XM_013876470.1|	411	0	PREDICTED: Brassica napus histone H3.3 (LOC106435535), mRNA	Q71H73	274
BraA01g000950.3C	3.90946	4.82918	4.83849	5.231	7.11178	6.06337	9.04263	3.27546	4.19554	3.52667	4.42745	6.20231	4.28185	3.09285	4.424	4.67471	4.65938	4.7871	3.02329	0.44569	0.35979	1.1466	4.05912	0.779336	0.681205	0.579381	0.454861	0.674133	0.951308	0.721292	3.07503	0.516747	3.15981	1.20742	4.02745	3.80258	BraA01g000950.3C	protein_coding	chrA01:445524-447994:-	gi|685256221|ref|XP_009130407.1|	3106	0	PREDICTED: protein SCAI homolog [Brassica rapa]	gi|685256220|ref|XM_009132159.1|	1764	0	PREDICTED: Brassica rapa protein SCAI homolog (LOC103855172), transcript variant X1, mRNA	Q8C8N2	240
BraA01g000980.3C	0.488682	1.3866	0.399051	0.992086	1.11121	0.918692	1.71334	1.55974	1.98736	0.554192	0.527078	0.843514	0.36112	0.629054	0.480869	1.71864	1.46438	1.72335	0.941679	0.89138	0.719581	0.938128	2.56366	1.78134	0.576404	0.52671	1.11188	1.15566	0.996608	1.34641	0.67755	0.77512	0.813889	1.76469	1.58978	2.20961	BraA01g000980.3C	protein_coding	chrA01:456217-458686:-	gi|685256221|ref|XP_009130407.1|	3106	0	PREDICTED: protein SCAI homolog [Brassica rapa]	gi|685256220|ref|XM_009132159.1|	1764	0	PREDICTED: Brassica rapa protein SCAI homolog (LOC103855172), transcript variant X1, mRNA	Q8C8N2	240
BraA01g000990.3C	22.3879	17.1556	21.1331	115.728	114.881	115.742	43.3178	49.2185	50.9173	69.4473	72.8682	71.6148	86.1706	87.6677	90.0696	205.828	203.07	102.086	77.5614	47.1811	46.5734	156.573	202.135	197.363	106.328	78.9033	77.1455	46.365	40.864	46.5936	167.247	169.906	179.348	101.669	109.249	125.624	BraA01g000990.3C	protein_coding	chrA01:467785-468909:-	gi|685256228|ref|XP_009130694.1|	1478	0	PREDICTED: homeobox-leucine zipper protein ATHB-16-like isoform X2 [Brassica rapa]	gi|923507457|ref|XM_013876209.1|	885	0	PREDICTED: Brassica napus homeobox-leucine zipper protein ATHB-16-like (LOC106435248), transcript variant X2, mRNA	Q940J1	468
BraA01g001000.3C	41.5148	50.0968	42.3755	12.7697	13.3271	12.8545	45.4258	46.0734	47.0816	36.7577	38.1919	38.6808	33.4279	38.5081	32.8411	11.5657	11.8637	14.5659	14.9429	18.6426	17.0377	9.6365	9.07456	8.90174	13.0055	15.7048	15.7429	12.272	11.847	10.8133	13.6303	13.1697	13.956	24.7537	11.7402	12.069	BraA01g001000.3C	protein_coding	chrA01:472679-473843:+	gi|685256231|ref|XP_009130877.1|	1817	0	PREDICTED: putative clathrin assembly protein At4g40080 [Brassica rapa]	gi|685256230|ref|XM_009132629.1|	1077	0	PREDICTED: Brassica rapa putative clathrin assembly protein At4g40080 (LOC103855590), mRNA	Q8L936	577
BraA01g001010.3C	42.4142	58.178	41.6363	30.5248	34.6097	36.6252	78.6617	72.9772	80.4675	59.4189	60.6308	61.1982	51.2023	45.9333	56.1141	15.9872	18.7965	15.9038	10.0852	11.9277	8.75133	7.79167	3.77056	5.08579	15.6677	16.6236	19.0993	15.5974	18.436	16.9737	28.3536	27.0388	26.0451	1.15711	1.54047	1.06698	BraA01g001010.3C	protein_coding	chrA01:474450-474881:-	gi|923521442|ref|XP_013669444.1|	156	4e-11	PREDICTED: classical arabinogalactan protein 3-like [Brassica napus]	gi|685256232|ref|XM_009132732.1|	432	0	PREDICTED: Brassica rapa classical arabinogalactan protein 3-like (LOC103855682), mRNA	Q9ZT17	51.6
BraA01g001020.3C	81.2267	34.4462	86.1988	46.714	44.2132	44.1233	32.2702	30.8461	31.1927	21.5877	20.5992	25.9337	20.1618	17.5252	17.2083	2.9133	8.14893	10.519	49.2413	49.2006	45.4995	29.6942	26.6577	28.5707	25.167	32.4893	25.7015	10.8832	12.7982	8.15116	23.8049	21.6553	24.572	27.5519	29.1944	21.5345	BraA01g001020.3C	protein_coding	chrA01:478229-478609:+	gi|923507475|ref|XP_013732208.1|	444	5e-54	PREDICTED: uncharacterized protein LOC106435796 [Brassica napus]	gi|685256234|ref|XM_009132839.1|	352	0	PREDICTED: Brassica rapa uncharacterized LOC103855772 (LOC103855772), mRNA	.	.
BraA01g001030.3C	1.50721	1.02409	1.53846	5.67923	5.71209	6.8869	4.15898	1.33628	1.60805	2.41714	2.30298	2.42306	4.33137	4.40127	4.86133	3.88718	3.64969	5.6324	6.92122	6.1094	5.72454	11.654	19.081	20.6028	10.7744	9.11525	8.35679	1.44388	1.55241	1.4007	11.3863	11.0679	12.5101	23.0361	19.5223	15.7167	BraA01g001030.3C	protein_coding	chrA01:480137-483142:+	gi|685256239|ref|XP_009131305.1|	3206	0	PREDICTED: nucleobase-ascorbate transporter 11 [Brassica rapa]	gi|685256238|ref|XM_009133057.1|	2094	0	PREDICTED: Brassica rapa nucleobase-ascorbate transporter 11 (LOC103855962), mRNA	Q6SZ87	1000
BraA01g001040.3C	8.25873	10.0143	5.47586	13.0274	13.4025	11.8766	10.1743	9.76284	8.77138	12.2986	11.953	12.1841	11.9227	12.948	12.9194	21.2501	17.4024	17.0562	24.1973	21.5307	19.3773	20.7025	24.5328	22.5946	18.3169	17.4985	15.1845	22.3266	20.6117	19.3092	21.6063	22.0938	20.4004	22.8739	22.5042	23.3065	BraA01g001040.3C	protein_coding	chrA01:483409-484980:-	gi|685256237|ref|XP_009131194.1|	2008	0	PREDICTED: probable glycosyltransferase At5g03795 [Brassica rapa]	gi|685256236|ref|XM_009132946.1|	1242	0	PREDICTED: Brassica rapa probable glycosyltransferase At5g03795 (LOC103855868), mRNA	Q9FFN2	241
BraA01g001050.3C	0.131834	0.47296	0.0897114	0.121654	0.199852	0.206533	0.427977	0.981818	0.744638	0.453051	0.331782	0.401574	0	0.188558	0.0864842	0.123639	0.0598563	0.516574	0.356549	0.267191	0.277321	0.140602	0.240142	0.150175	0.141363	0.521007	0.49993	0.303106	0.203681	0.432413	0.374945	0.185873	0.258314	1.58689	1.28665	1.34006	BraA01g001050.3C	protein_coding	chrA01:487213-490731:+	gi|685256241|ref|XP_009131413.1|	3563	0	PREDICTED: rhamnogalacturonate lyase B [Brassica rapa]	gi|685256240|ref|XM_009133165.1|	1995	0	PREDICTED: Brassica rapa rhamnogalacturonate lyase B (LOC103856050), mRNA	Q8RJP2	140
BraA01g001060.3C	0.0862041	0.0843439	0	0.0795478	0.294029	0.243088	0.671634	0.183427	0.584288	0.533237	0.278931	0.262583	0.273008	0.739772	0.0848259	1.81902	0.469669	1.35112	0.262284	0.698847	0.181336	0.735497	0.847935	1.08017	0	0.0929123	0.0891534	0.339765	0.479462	0.678596	0.0919389	0.182309	0	0.737273	0.467399	0.181292	BraA01g001060.3C	protein_coding	chrA01:491046-492220:-	gi|685256243|ref|XP_009131519.1|	1787	0	PREDICTED: RNA methyltransferase-like protein 1 [Brassica rapa]	gi|685256242|ref|XM_009133271.1|	1017	0	PREDICTED: Brassica rapa RNA methyltransferase-like protein 1 (LOC103856150), mRNA	P94538	95.9
BraA01g001070.3C	0	0	0	0	0	0	0	0	0	0	0	0	0	0	0	0	0	0	0	0	0	0	0	0	0.257905	0	0	0	0.11148	0	0	0	0	0	0	0	BraA01g001070.3C	protein_coding	chrA01:493179-493907:-	gi|685256245|ref|XP_009131626.1|	1071	2e-145	PREDICTED: dof zinc finger protein DOF4.7 [Brassica rapa]	gi|685256244|ref|XM_009133378.1|	729	0	PREDICTED: Brassica rapa dof zinc finger protein DOF4.7 (LOC103856245), mRNA	Q84K52	278
BraA01g001080.3C	0.408145	0.638941	0.499928	1.28054	1.20651	1.15093	1.11298	1.129	1.01434	0.925717	1.05651	0.828822	2.15432	2.36422	2.24907	0.344496	0	0.106618	1.07624	2.39887	2.40396	1.39292	1.07058	2.04568	3.67623	2.11155	1.77286	1.12607	0.983701	0.722903	1.82825	1.98529	2.07926	1.629	1.32778	1.80254	BraA01g001080.3C	protein_coding	chrA01:496908-498395:-	gi|685256247|ref|XP_009131731.1|	1514	0	PREDICTED: cinnamyl alcohol dehydrogenase 7-like [Brassica rapa]	gi|685256246|ref|XM_009133483.1|	1074	0	PREDICTED: Brassica rapa cinnamyl alcohol dehydrogenase 7-like (LOC103856341), mRNA	Q02971	503
BraA01g001090.3C	0.694138	1.49415	1.06279	6.66161	5.36656	7.1119	4.19133	5.46491	4.70484	8.80221	6.21401	6.13171	3.2975	4.31871	3.82502	7.22597	5.10555	4.98646	3.80156	2.11024	2.19024	4.44181	3.03457	5.45588	5.2846	3.29187	4.4509	6.01893	6.49894	6.28386	3.33142	2.8626	3.40021	0.989452	1.12908	0.656914	BraA01g001090.3C	protein_coding	chrA01:504964-508673:-	gi|923521263|ref|XP_013669015.1|	1719	0	PREDICTED: probable cinnamyl alcohol dehydrogenase 6 [Brassica napus]	gi|685256248|ref|XM_009133588.1|	1063	0	PREDICTED: Brassica rapa probable cinnamyl alcohol dehydrogenase 6 (LOC103856448), mRNA	O65621	602
BraA01g001100.3C	34.6867	28.344	32.2932	21.3389	20.2241	22.6917	20.0461	21.7636	18.6591	16.3738	15.0744	13.9329	18.1076	21.6709	17.5036	20.7337	19.9022	36.5096	12.6284	24.5922	23.7873	25.2044	21.8018	19.8285	18.3925	23.8284	23.6528	21.7841	26.7363	25.1298	17.4808	24.7212	16.8044	26.4425	31.4141	25.5184	BraA01g001100.3C	protein_coding	chrA01:514988-517974:+	gi|674958294|emb|CDX75686.1|	1105	4e-151	BnaA01g00160D [Brassica napus]	gi|923507496|ref|XM_013877657.1|	679	0	PREDICTED: Brassica napus agamous-like MADS-box protein AGL21 (LOC106436609), transcript variant X2, mRNA	Q9SZJ6	393
BraA01g001110.3C	6.54419	3.97426	7.08295	1.56178	1.09041	1.43178	2.58232	3.60126	2.16683	2.38464	3.0424	2.52039	1.19112	1.87603	1.44335	4.36495	3.6116	2.87374	1.71649	2.00092	2.25479	1.86519	1.84974	1.47807	1.20986	1.0945	1.63368	3.16857	3.50387	4.32998	2.1059	2.2669	2.10025	1.66195	1.65178	1.0678	BraA01g001110.3C	protein_coding	chrA01:518566-521307:+	gi|674958293|emb|CDX75685.1|	2780	0	BnaA01g00170D [Brassica napus]	gi|685256252|ref|XM_009133794.1|	1551	0	PREDICTED: Brassica rapa serine hydroxymethyltransferase 1, mitochondrial-like (LOC103856643), mRNA	Q9SZJ5	1054
BraA01g001120.3C	1.88132	2.08615	1.40824	1.90966	1.85377	3.0652	1.58792	1.33437	1.34599	2.13352	2.57024	2.35592	1.98605	2.55626	2.2832	5.82243	5.29587	4.50494	2.03524	2.73259	2.44044	1.8058	1.64492	1.92875	1.27763	1.28422	0.778275	1.66839	1.68583	1.91292	1.60518	1.52518	0.921559	1.54943	2.44813	2.5058	BraA01g001120.3C	protein_coding	chrA01:521848-523604:+	gi|685256255|ref|XP_009132152.1|	2147	0	PREDICTED: uncharacterized protein At4g37920, chloroplastic [Brassica rapa]	gi|685256254|ref|XM_009133904.1|	874	0	PREDICTED: Brassica rapa uncharacterized protein At4g37920, chloroplastic (LOC103856741), mRNA	Q84WN0	724
BraA01g001130.3C	57.1628	72.0048	57.9548	92.4685	89.8981	92.0992	87.715	90.678	88.065	76.8415	76.0985	76.026	124.574	119.425	123.487	133.382	126.115	122.443	65.1778	62.9561	64.9379	80.86	92.0289	82.9539	102.907	113.814	116.511	79.5976	79.603	80.7932	66.6697	65.0152	65.3077	108.48	118.964	112.118	BraA01g001130.3C	protein_coding	chrA01:523816-526255:+	gi|685256257|ref|XP_009132240.1|	3464	0	PREDICTED: heat shock 70 kDa protein 9, mitochondrial [Brassica rapa]	gi|685256256|ref|XM_009133992.1|	2049	0	PREDICTED: Brassica rapa heat shock 70 kDa protein 9, mitochondrial (LOC103856835), mRNA	Q8GUM2	1225
BraA01g001140.3C	45.2883	34.1315	46.6957	44.5445	39.5747	41.7786	33.8993	32.0676	32.4074	31.6264	32.1793	36.1965	38.6835	42.5083	39.897	23.353	21.4652	32.7735	35.3795	41.1645	40.8746	38.0201	38.2932	34.2474	49.7102	40.8145	41.3786	30.5288	27.7279	28.3038	45.1191	49.9115	48.4158	31.2601	29.7816	31.8552	BraA01g001140.3C	protein_coding	chrA01:526879-528024:-	gi|685256259|ref|XP_009132311.1|	2056	0	PREDICTED: protein RMD5 homolog A [Brassica rapa]	gi|685256258|ref|XM_009134063.1|	1146	0	PREDICTED: Brassica rapa protein RMD5 homolog A (LOC103856919), mRNA	Q9T075	649
BraA01g001150.3C	138.09	141.683	138.994	107.786	105.676	107.252	55.052	56.3812	53.6573	123.12	122.549	120.06	100.147	95.0729	89.0577	189.719	197.24	209.133	193.046	165.439	170.747	115.689	101.489	101.258	84.6525	82.8801	76.5951	109.679	113.089	105.88	88.0127	88.5073	90.1624	82.4	90.2918	96.4064	BraA01g001150.3C	protein_coding	chrA01:531906-535022:+	gi|923507507|ref|XP_013733417.1|	3280	0	PREDICTED: phosphoenolpyruvate carboxykinase [ATP] [Brassica napus]	gi|685256260|ref|XM_009134176.1|	2001	0	PREDICTED: Brassica rapa phosphoenolpyruvate carboxykinase [ATP] (LOC103856993), mRNA	Q9T074	1219
BraA01g001160.3C	0	0	0.0890419	0	0	0	0	0.0928086	0	0	0	0	0	0	0	0.122716	0	0.113938	0	0	0	0	0	0	0	0	0.090218	0	0	0	0	0	0	0	0	0	BraA01g001160.3C	protein_coding	chrA01:535962-537342:+	gi|685256263|ref|XP_009132531.1|	1475	0	PREDICTED: uncharacterized protein LOC103857094 [Brassica rapa]	gi|923517514|ref|XM_013797655.1|	910	0	PREDICTED: Brassica napus uncharacterized LOC106357927 (LOC106357927), mRNA	.	.
BraA01g001170.3C	4.16235	1.86658	2.21284	1.04026	1.1831	1.79322	2.44912	2.58322	2.74286	1.2516	1.58999	1.58485	0.457714	0.279061	0.682635	0.243976	0.118114	0.566307	0.967416	0.702994	0.729647	0.647379	0.473871	0.296339	1.85967	1.77581	0.538095	1.02535	2.00962	1.5359	0.924846	0.825261	0.934502	0.329622	0.470173	0.638287	BraA01g001170.3C	protein_coding	chrA01:543625-544934:+	gi|685256265|ref|XP_009132646.1|	1567	0	PREDICTED: transcription factor bHLH25 [Brassica rapa]	gi|685256264|ref|XM_009134398.1|	1011	0	PREDICTED: Brassica rapa transcription factor bHLH25 (LOC103857186), mRNA	Q9T072	452
BraA01g001180.3C	3.74778	6.91606	3.19597	7.22322	6.74215	7.35774	4.3892	5.60242	5.19836	4.74416	4.80976	4.33517	5.75932	5.69961	6.6755	11.2785	12.7943	11.5251	11.8841	9.4706	9.77976	8.85417	8.76246	9.07876	5.90083	3.88602	3.38537	5.56269	6.72843	5.50836	6.02096	5.86927	7.57573	3.87707	4.93865	4.98847	BraA01g001180.3C	protein_coding	chrA01:556142-559702:+	gi|923521267|ref|XP_013669033.1|	1959	0	PREDICTED: probable hexokinase-like 2 protein [Brassica napus]	gi|685256266|ref|XM_009134483.1|	1462	0	PREDICTED: Brassica rapa probable hexokinase-like 2 protein (LOC103857280), mRNA	Q9T071	637
BraA01g001190.3C	0	0	0	0.219241	0	0.446649	0	0	0	0	0	0.241234	0	0.254861	0	2.33959	0.647226	0.310318	0.481921	0	0	0	0.259666	0	0	0	0	0	0	0	1.01357	1.00493	0	0.225777	0	0.499658	BraA01g001190.3C	protein_coding	chrA01:564130-564658:-	gi|685256272|ref|XP_009132987.1|	602	4e-78	PREDICTED: EPIDERMAL PATTERNING FACTOR-like protein 2 [Brassica rapa]	gi|923521274|ref|XM_013813594.1|	369	0	PREDICTED: Brassica napus EPIDERMAL PATTERNING FACTOR-like protein 2 (LOC106373417), mRNA	Q9T068	180
BraA01g001200.3C	10.7393	4.04136	13.1754	11.5299	13.5015	11.7447	11.9675	11.8651	12.2484	9.5813	13.0309	11.8478	12.5362	14.7324	13.5143	41.691	39.5231	56.2421	7.95935	14.1266	13.4675	18.0613	22.1202	18.8205	10.9619	8.68122	8.6504	7.22422	7.17923	7.72232	22.9074	24.3499	21.8517	26.5931	30.6818	36.701	BraA01g001200.3C	protein_coding	chrA01:580291-581324:-	gi|685256274|ref|XP_009133094.1|	1268	4e-174	PREDICTED: homeobox-leucine zipper protein HAT22 [Brassica rapa]	gi|923918926|ref|XM_013873374.1|	849	0	PREDICTED: Brassica napus homeobox-leucine zipper protein HAT22 (LOC106432527), mRNA	P46604	422
BraA01g001210.3C	0.0955006	0	0.0974805	0.881265	0.434318	0.269303	0.558049	0.203208	0.32365	2.95371	2.4721	3.29687	0.907351	0.614664	0.657817	0.537385	0.520319	0.498943	2.03399	0.387106	0.502228	0.712964	1.14813	1.30544	1.22884	0.514661	1.38275	3.19946	4.24935	3.47697	4.17601	5.15024	3.36821	3.44864	3.62463	5.92487	BraA01g001210.3C	protein_coding	chrA01:592119-593284:+	gi|685256276|ref|XP_009133189.1|	1437	0	PREDICTED: transcription factor RAX3 isoform X1 [Brassica rapa]	gi|923918882|ref|XM_013873351.1|	918	0	PREDICTED: Brassica napus transcription factor RAX3-like (LOC106432510), transcript variant X1, mRNA	F4JSU0	393
BraA01g001220.3C	0.124354	0.304176	0	2.40979	2.54492	1.16889	1.15053	1.98453	1.2643	1.15383	1.27418	1.83082	3.74137	3.26818	2.75323	9.44653	7.96088	6.0096	2.20709	0.945116	2.68126	2.98404	3.12593	2.54978	0.933396	0.938216	1.28609	3.92104	3.51589	3.48737	5.76927	6.50903	6.82241	11.4628	12.9456	12.9454	BraA01g001220.3C	protein_coding	chrA01:599185-600948:-	gi|685256280|ref|XP_009133375.1|	2526	0	PREDICTED: 1-aminocyclopropane-1-carboxylate synthase 8 [Brassica rapa]	gi|685256279|ref|XM_009135127.1|	1410	0	PREDICTED: Brassica rapa 1-aminocyclopropane-1-carboxylate synthase 8 (LOC103857842), mRNA	Q9T065	903
BraA01g001230.3C	0	0.220792	0	0.260296	0.128283	0.318173	0.164829	0.060021	0.0637303	0	0.060848	0	0.119112	0.181551	0.0555135	0	0.30737	0.221057	0.171649	0	0.0593366	0.120335	0.184974	0.128528	0	0	0	0.166767	0.15689	0.0555125	0	0	0	0	0.0611769	0	BraA01g001230.3C	protein_coding	chrA01:609038-611315:-	gi|685256282|ref|XP_009133477.1|	2552	0	PREDICTED: squalene epoxidase 3 [Brassica rapa]	gi|923918898|ref|XM_013873360.1|	1554	0	PREDICTED: Brassica napus squalene epoxidase 3-like (LOC106432517), mRNA	Q8VYH2	893
BraA01g001240.3C	0.267612	0.261837	0.819479	17.4345	18.0123	16.9542	6.82844	5.46653	6.10667	5.29721	6.00367	5.32572	7.91024	7.23412	7.63666	34.4088	33.0974	17.4068	4.12545	0.976274	1.51993	18.4945	37.7885	34.3862	24.3337	11.3644	8.80121	5.643	6.15222	5.8459	18.2665	18.4503	22.2326	13.0715	12.4205	16.9403	BraA01g001240.3C	protein_coding	chrA01:614222-616621:-	gi|923918785|ref|XP_013728759.1|	2590	0	PREDICTED: AP2-like ethylene-responsive transcription factor ANT [Brassica napus]	gi|923918784|ref|XM_013873305.1|	1615	0	PREDICTED: Brassica napus AP2-like ethylene-responsive transcription factor ANT (LOC106432465), mRNA	Q38914	851
BraA01g001250.3C	0.345428	1.48708	0.423107	2.80505	3.06333	3.31185	2.89315	3.08704	3.35586	2.0655	2.83152	2.17453	3.5007	2.59379	2.78722	6.70587	7.05752	9.4746	2.59246	1.6102	1.52592	3.75769	4.22832	3.54136	2.07421	1.26585	1.35754	2.11028	1.79317	2.17536	1.62099	1.82633	1.48902	0.525213	1.72308	1.16233	BraA01g001250.3C	protein_coding	chrA01:631388-633122:+	gi|674958280|emb|CDX75672.1|	1696	0	BnaA01g00300D [Brassica napus]	gi|685256285|ref|XM_009135456.1|	959	0	PREDICTED: Brassica rapa growth-regulating factor 2 (LOC103858126), mRNA	Q8L8A8	423
BraA01g001260.3C	30.5246	20.8367	36.8334	19.9794	21.388	21.3523	78.6985	87.4825	82.8649	26.3466	26.9254	25.8277	12.6147	13.7068	15.3676	4.99311	5.47915	10.3536	23.8785	20.7415	23.3945	31.0405	34.2664	36.9276	46.4323	47.5647	48.0876	44.8831	48.2568	42.7258	20.1893	24.6461	20.0524	46.3218	51.7042	40.3085	BraA01g001260.3C	protein_coding	chrA01:633994-634734:-	gi|685256288|ref|XP_009133819.1|	924	5e-123	PREDICTED: light-inducible protein CPRF2-like [Brassica rapa]	gi|685256287|ref|XM_009135571.1|	741	0	PREDICTED: Brassica rapa light-inducible protein CPRF2-like (LOC103858218), mRNA	.	.
BraA01g001270.3C	12.6244	9.98834	12.1702	16.18	17.0114	16.3348	11.4601	10.3636	8.71524	8.59649	7.90083	8.54549	18.4277	17.9728	20.9344	10.4145	10.9329	13.5373	6.63894	8.44976	9.99957	9.22534	12.6904	12.5166	10.6958	10.1631	8.38185	4.83758	4.98449	4.9076	15.7914	13.1846	13.895	12.8115	11.9998	12.8652	BraA01g001270.3C	protein_coding	chrA01:638657-640312:-	gi|685256290|ref|XP_009133930.1|	1909	0	PREDICTED: adiponectin receptor protein-like isoform X1 [Brassica rapa]	gi|685256289|ref|XM_009135682.1|	1125	0	PREDICTED: Brassica rapa adiponectin receptor protein-like (LOC103858313), transcript variant X1, mRNA	Q9SZG0	701
BraA01g001280.3C	12.1645	17.388	13.6292	14.9523	15.3971	15.4094	16.9375	14.3574	12.7218	5.53569	4.76633	3.95625	9.6312	9.58276	9.30478	12.0322	14.5626	17.5019	15.7588	24.4132	25.0389	22.1968	25.2395	26.1439	18.5465	20.8445	21.9178	8.00645	6.91556	6.63948	14.1393	13.466	13.6399	17.6558	23.136	18.5873	BraA01g001280.3C	protein_coding	chrA01:642048-644503:+	gi|685256294|ref|XP_009134121.1|	3275	0	PREDICTED: probable amino-acid acetyltransferase NAGS2, chloroplastic [Brassica rapa]	gi|685256293|ref|XM_009135873.1|	1845	0	PREDICTED: Brassica rapa probable amino-acid acetyltransferase NAGS2, chloroplastic (LOC103858470), mRNA	B5X4Z4	1119
BraA01g001290.3C	8.70129	3.37328	9.16097	11.8674	11.5729	11.1625	15.7226	15.7783	17.4335	9.76053	11.6869	12.2799	8.26131	7.33798	7.32362	4.15718	5.36689	6.14709	4.93969	8.04116	7.59776	14.7079	11.1248	13.0911	10.4451	12.7994	11.1497	7.49536	6.8485	7.75429	11.1479	9.43246	9.97216	7.64472	8.13011	8.28647	BraA01g001290.3C	protein_coding	chrA01:646514-648115:-	gi|923503532|ref|XP_013681870.1|	2393	0	PREDICTED: protein SHORT-ROOT [Brassica napus]	gi|923503531|ref|XM_013826416.1|	1599	0	PREDICTED: Brassica napus protein SHORT-ROOT (LOC106386234), mRNA	Q9SZF7	861
BraA01g001300.3C	320.442	244.753	298.29	271.537	273.511	280.549	293.864	325.418	318.855	44.9106	48.7498	49.8487	98.8843	95.2975	92.3259	15.567	17.4078	36.0316	140.919	181.788	187.123	310.171	256.533	270.66	212.162	216.617	218.25	66.6511	62.9202	58.0478	117.937	120.804	115.282	38.6567	41.4078	48.7567	BraA01g001300.3C	protein_coding	chrA01:654212-655623:+	gi|923503536|ref|XP_013682869.1|	1891	0	PREDICTED: BTB/POZ and TAZ domain-containing protein 5-like [Brassica napus]	gi|685256297|ref|XM_009136091.1|	1125	0	PREDICTED: Brassica rapa BTB/POZ and TAZ domain-containing protein 5-like (LOC103858660), mRNA	Q6EJ98	638
BraA01g001310.3C	0	0	0	0.730625	0.491015	0.811889	0	0.0765786	0.406555	0	0.232901	0	0.15197	0.617692	0.495793	0.50628	0.392162	0.658088	0	0.07294	0	0.997948	0.472003	0.901913	0.694628	0.620636	0.148882	0.0709239	0	0.0708263	1.1515	0.608895	1.55137	1.09441	0.858586	0.908246	BraA01g001310.3C	protein_coding	chrA01:659239-661063:-	gi|923503539|ref|XP_013683960.1|	2060	0	PREDICTED: probable N-acetyltransferase HLS1 [Brassica napus]	gi|685256299|ref|XM_009136202.1|	1143	0	PREDICTED: Brassica rapa probable N-acetyltransferase HLS1 (LOC103858747), mRNA	Q42381	702
BraA01g001320.3C	0.899175	2.07375	0.983374	1.77802	1.31441	1.14705	1.93907	1.09331	2.17663	2.1851	2.35528	2.21724	0.610218	1.30903	0.5688	1.71668	2.36202	1.50999	0.325694	0.911189	0.202657	0.0684982	0.491368	0.365811	0.0688691	0.138449	0	0.189858	0.297688	0.189597	0.410997	0.475407	0.377535	0.366206	0.0696476	0.202609	BraA01g001320.3C	protein_coding	chrA01:667979-670302:-	gi|685256302|ref|XP_009134560.1|	2424	0	PREDICTED: putative formamidase C869.04 [Brassica rapa]	gi|685256301|ref|XM_009136312.1|	1365	0	PREDICTED: Brassica rapa putative formamidase C869.04 (LOC103858845), mRNA	Q50228	433
BraA01g001330.3C	10.5797	16.6001	10.9966	9.88184	8.9481	10.9148	5.96854	3.63757	4.44536	3.25887	2.78316	3.14404	2.86026	2.07602	2.03133	3.44851	3.25113	3.03331	11.5805	18.3696	18.4554	9.21929	10.8578	8.74474	6.36393	7.37022	7.53908	6.10228	6.15945	4.82432	8.46264	11.1873	10.9337	5.51734	4.61703	5.83376	BraA01g001330.3C	protein_coding	chrA01:670750-672789:-	gi|685256304|ref|XP_009134675.1|	2418	0	PREDICTED: putative formamidase C869.04 [Brassica rapa]	gi|685256303|ref|XM_009136427.1|	1359	0	PREDICTED: Brassica rapa putative formamidase C869.04 (LOC103858933), mRNA	Q50228	419
BraA01g001340.3C	72.3561	33.7118	78.8059	55.2287	60.3569	56.977	75.6875	82.547	78.7105	13.9457	16.6543	15.9373	22.0934	19.7122	18.4591	1.97471	1.39055	10.834	32.4854	42.804	41.0713	55.6645	67.504	71.2293	40.2298	31.6348	27.1875	9.6822	12.6576	9.92002	15.3795	13.4941	13.5022	5.57838	5.12016	6.5752	BraA01g001340.3C	protein_coding	chrA01:677374-678247:+	gi|685256306|ref|XP_009134786.1|	1122	1e-153	PREDICTED: LOB domain-containing protein 39 [Brassica rapa]	gi|923503551|ref|XM_013831583.1|	504	0	PREDICTED: Brassica napus LOB domain-containing protein 39-like (LOC106390718), mRNA	.	.
BraA01g001350.3C	0.509707	2.16107	0.520274	0.313566	0.579511	0.159703	0.496404	0.723044	0	0	0	0.345021	0	0.36451	0.83593	1.91209	0.462842	0.443827	0.516944	0	1.0722	0.362403	0.928456	0.387079	0.546548	0.183124	0.527146	0.50224	1.57498	1.83901	0.36241	0.17966	0	3.06768	0.921211	1.42925	BraA01g001350.3C	protein_coding	chrA01:680614-682022:-	gi|922414973|ref|XP_013593170.1|	450	1e-61	PREDICTED: peroxidase 50-like isoform X2 [Brassica oleracea var. oleracea]	gi|922414972|ref|XM_013737716.1|	186	2e-91	PREDICTED: Brassica oleracea var. oleracea peroxidase 50-like (LOC106301335), transcript variant X2, mRNA	Q43731	129
BraA01g001360.3C	24.2186	28.8549	25.6329	65.9736	61.1671	66.5302	16.1015	15.3077	19.8881	23.0335	22.1695	20.4164	58.2092	68.16	65.6023	123.833	103.224	100.15	32.2666	50.1711	50.8513	53.7554	44.2456	43.6724	36.3184	26.4885	26.7109	54.9485	51.9425	56.7195	121.333	122.755	120.998	77.2821	77.6251	71.1371	BraA01g001360.3C	protein_coding	chrA01:683624-684955:-	gi|685256308|ref|XP_009135008.1|	1675	0	PREDICTED: peroxidase 50 [Brassica rapa]	gi|923503553|ref|XM_013832623.1|	981	0	PREDICTED: Brassica napus peroxidase 50-like (LOC106391590), mRNA	Q43731	589
BraA01g001370.3C	1.59	3.27232	1.00736	3.59219	2.86748	3.76216	3.20381	2.79993	2.78715	2.88278	4.08035	3.39584	2.72035	2.82307	2.212	8.48422	10.6046	6.01539	5.11577	4.77819	4.26734	4.03471	5.03352	4.55925	2.58679	2.48196	2.43825	3.56562	5.5399	4.63972	2.80681	3.36263	2.90058	2.44882	1.66475	2.01785	BraA01g001370.3C	protein_coding	chrA01:688675-691106:+	gi|685256310|ref|XP_009135118.1|	2438	0	PREDICTED: uncharacterized protein LOC103859321 [Brassica rapa]	gi|685256309|ref|XM_009136870.1|	1599	0	PREDICTED: Brassica rapa uncharacterized LOC103859321 (LOC103859321), mRNA	Q9SZV0	872
BraA01g001380.3C	0.425286	2.19943	0.930219	2.24255	2.90117	1.54191	7.39618	3.49045	3.363	3.63288	2.88326	4.62659	5.38751	2.99792	3.52724	7.00834	6.95129	4.44381	2.71118	1.97014	2.49214	3.95253	3.85126	3.80641	2.21498	1.30966	1.44518	3.65177	2.87229	2.51087	1.81431	1.67035	1.9642	8.77574	1.05413	2.236	BraA01g001380.3C	protein_coding	chrA01:691860-693690:+	gi|685256313|ref|XP_009135301.1|	1686	0	PREDICTED: cyclin-B1-1 [Brassica rapa]	gi|685256312|ref|XM_009137053.1|	767	0	PREDICTED: Brassica rapa cyclin-B1-1 (LOC103859480), mRNA	P30183	489
BraA01g001390.3C	0	0	0	0	0	0	0	0	0	0	0	0	0	0	0	0	0	0	0.20582	0	0	0	0	0	0	0	0	0	0	0	0	0	0	0	0	0	BraA01g001390.3C	protein_coding	chrA01:694027-694458:-	gi|923516494|ref|XP_013648753.1|	235	8e-23	PREDICTED: myb-related protein Myb4-like [Brassica napus]	gi|685256311|ref|XR_631239.1|	224	1e-112	PREDICTED: Brassica rapa uncharacterized LOC103859416 (LOC103859416), ncRNA	Q9SA47	70.1
BraA01g001400.3C	18.3713	15.2995	17.2404	16.1905	18.6852	17.0007	12.7601	13.5151	12.7094	12.0394	11.0287	12.6091	11.6664	11.7325	11.4071	13.543	12.4534	13.8391	10.5149	12.8153	13.1513	11.6951	10.9887	10.9665	9.07079	11.021	10.9875	11.9559	13.5712	12.3318	9.41702	8.88492	8.87355	12.153	12.1693	11.2613	BraA01g001400.3C	protein_coding	chrA01:702158-708163:+	gi|685256317|ref|XP_009135514.1|	5160	0	PREDICTED: tetratricopeptide repeat protein 13 [Brassica rapa]	gi|685256316|ref|XM_009137266.1|	3007	0	PREDICTED: Brassica rapa tetratricopeptide repeat protein 13 (LOC103859664), mRNA	F4JS25	1633
BraA01g001410.3C	5.71403	21.724	10.3318	187.712	183.203	184.456	69.3228	64.0924	73.0328	62.4438	64.2711	65.8085	123.744	108.929	121.932	172.708	199.467	155.235	33.4464	11.4153	13.5652	56.5876	59.7739	48.5384	49.0163	40.2954	37.821	36.5167	34.9592	32.7716	47.3604	51.0996	50.5419	35.6829	34.6993	36.3941	BraA01g001410.3C	protein_coding	chrA01:709951-710628:+	gi|685256319|ref|XP_009135615.1|	128	7e-07	PREDICTED: lysine-rich arabinogalactan protein 18 [Brassica rapa]	gi|923520093|ref|XM_013809890.1|	537	0	PREDICTED: Brassica napus lysine-rich arabinogalactan protein 18-like (LOC106369775), mRNA	.	.
BraA01g001420.3C	21.876	24.2145	22.7806	27.5784	27.133	26.1188	27.3845	26.9768	27.2086	27.622	27.1697	28.9988	29.9752	28.9775	31.1478	49.736	44.9963	46.4667	28.8537	26.9826	25.5071	32.8163	28.3163	29.3873	28.7883	26.0195	25.024	30.4825	30.4694	27.9945	36.1164	39.0211	38.7503	26.7207	24.0817	32.1812	BraA01g001420.3C	protein_coding	chrA01:712895-716302:+	gi|674958264|emb|CDX75656.1|	2426	0	BnaA01g00460D [Brassica napus]	gi|685256329|ref|XM_009137869.1|	1075	0	PREDICTED: Brassica rapa uncharacterized LOC103860247 (LOC103860247), mRNA	.	.
BraA01g001430.3C	18.7287	20.6151	16.8921	25.1044	24.1388	25.2684	26.3378	18.3797	21.8866	27.1317	27.0787	24.9998	25.5662	23.9006	26.6906	39.52	37.7152	38.2746	23.7432	26.4232	21.906	24.4512	19.7633	27.2196	20.6883	18.3589	17.2822	26.4088	30.9061	28.1994	29.2732	27.1455	29.1043	32.1433	20.572	28.3522	BraA01g001430.3C	protein_coding	chrA01:717977-719317:+	gi|685256327|ref|XP_009136003.1|	1954	0	PREDICTED: uncharacterized protein LOC103860126 [Brassica rapa]	gi|685256326|ref|XM_009137755.1|	1086	0	PREDICTED: Brassica rapa uncharacterized LOC103860126 (LOC103860126), mRNA	.	.
BraA01g001440.3C	3.02309	3.56459	3.00664	5.57932	4.31841	5.24605	4.37854	3.54618	4.72855	2.1577	2.59177	1.96763	4.25516	4.82275	3.12731	6.21556	5.38468	7.39084	1.80816	2.27797	2.28281	3.38948	3.98177	4.15006	1.66236	1.67094	1.92401	1.52759	1.79639	0.991569	1.48809	1.80327	1.51882	3.97775	1.93332	3.34188	BraA01g001440.3C	protein_coding	chrA01:723003-724380:-	gi|685256323|ref|XP_009135827.1|	1522	0	PREDICTED: uncharacterized protein LOC103859947 [Brassica rapa]	gi|685256322|ref|XM_009137579.1|	1131	0	PREDICTED: Brassica rapa uncharacterized LOC103859947 (LOC103859947), mRNA	.	.
BraA01g001450.3C	0	0	0	0	0	0	0	0	0	0	0	0	0	0	0	0.289506	0	0	0	0	0	0	0	0	0	0	0	0	0	0	0	0	0	0	0	0	BraA01g001450.3C	protein_coding	chrA01:728988-730173:+	gi|685256332|ref|XP_009136224.1|	745	2e-98	PREDICTED: floral homeotic protein APETALA 1-like [Brassica rapa]	gi|923520090|ref|XM_013809881.1|	426	0	PREDICTED: Brassica napus floral homeotic protein APETALA 1-like (LOC106369765), mRNA	.	.
BraA01g001460.3C	0.144669	0.636964	0.147668	1.80223	2.05602	1.69981	3.80413	2.69352	2.45141	3.35583	3.51081	3.23159	2.749	3.41412	2.56241	0.712301	1.28083	1.60613	2.20085	1.83253	1.82592	2.00578	1.8183	2.05995	1.86151	1.32538	2.16947	1.85315	2.21277	1.49472	1.62008	1.3768	1.34645	7.08013	5.09858	10.8008	BraA01g001460.3C	protein_coding	chrA01:730999-732750:-	gi|685256334|ref|XP_009136332.1|	1907	0	PREDICTED: cytochrome P450 81F1 [Brassica rapa]	gi|923503819|ref|XM_013881785.1|	1129	0	PREDICTED: Brassica napus cytochrome P450 81F1-like (LOC106440154), mRNA	O65790	669
BraA01g001490.3C	24.1586	42.718	22.4609	201.498	197.102	202.952	258.582	271.457	273.502	97.8856	105.859	102.374	260.749	251.22	234.63	239.125	246.28	190.693	117.608	101.76	98.087	182.965	129.219	119.362	151.247	168.655	171.705	139.673	142.733	139.023	109.831	107.293	103.626	129.836	143.172	136.322	BraA01g001490.3C	protein_coding	chrA01:744013-745766:-	gi|985482305|ref|NP_001306250.1|	2415	0	cytochrome P450 81F1-like [Brassica rapa]	gi|923520083|ref|XM_013809865.1|	1506	0	PREDICTED: Brassica napus cytochrome P450 81F1-like (LOC106369747), mRNA	Q9SZU1	757
BraA01g001500.3C	0.195473	0	0.0997626	0.541138	0.888972	0.551215	0.0951856	0	0	3.02286	2.95164	4.16795	0.825416	1.67748	1.34643	0	0.133125	0.127656	1.68511	1.08946	1.43916	0.416946	0.320457	0.111334	1.78161	1.47479	1.41512	1.92609	1.35901	1.05789	2.91868	2.89378	2.5853	0.278635	0	0.41109	BraA01g001500.3C	protein_coding	chrA01:752745-753641:-	gi|685256342|ref|XP_009136769.1|	1500	0	PREDICTED: cytochrome P450 81F1 [Brassica rapa]	gi|685256341|ref|XM_009138521.1|	877	0	PREDICTED: Brassica rapa cytochrome P450 81F1 (LOC103860817), mRNA	Q0WTF4	538
BraA01g001510.3C	20.2773	29.9055	18.6685	35.2218	30.9651	37.6062	41.1903	41.7189	43.0058	78.394	76.3323	75.7944	91.7628	77.3034	85.4366	224.217	220.887	351.571	46.2718	30.5202	32.4614	46.75	44.2147	38.8369	25.1536	27.7476	27.7558	61.41	63.3473	62.3036	91.2757	85.2943	87.1552	97.8584	107.68	92.7095	BraA01g001510.3C	protein_coding	chrA01:761309-763402:-	gi|685382884|ref|XP_009123833.1|	3156	0	PREDICTED: indole-3-acetic acid-amido synthetase GH3.2 [Brassica rapa]	gi|685382883|ref|XM_009125585.1|	1764	0	PREDICTED: Brassica rapa indole-3-acetic acid-amido synthetase GH3.2 (LOC103848751), mRNA	O22190	1051
BraA01g001520.3C	0	0.0567313	0.0591846	0.160516	0.461463	0.381512	0.112938	0.123377	0.196502	0.0597775	0.125076	0.0588727	0.0612102	0.186594	0.114111	0	0	0	0.470446	0.705087	0.0609849	0.742064	0.380225	0.264197	0.0621735	0.0624946	0.119933	0.0571332	0.161248	0.171164	0.12368	0.122625	0.22722	0	0.0628763	0.12194	BraA01g001520.3C	protein_coding	chrA01:772828-774829:+	gi|685256344|ref|XP_009136876.1|	2496	0	PREDICTED: cytochrome P450 81D11-like [Brassica rapa]	gi|685256343|ref|XM_009138628.1|	1512	0	PREDICTED: Brassica rapa cytochrome P450 81D11-like (LOC103860913), mRNA	Q9LHA1	631
BraA01g001530.3C	8.59836	8.90769	7.17044	8.91975	9.9037	10.248	11.3842	12.9147	13.9667	6.43114	7.45552	6.67616	5.1021	6.39014	6.0277	5.37591	5.89411	7.26681	11.9692	13.7248	11.2306	16.7221	13.6355	12.8674	8.3762	9.02517	9.53188	9.02616	8.90832	9.40083	8.99057	9.44871	7.54284	6.46201	7.06923	5.96851	BraA01g001530.3C	protein_coding	chrA01:776387-779728:+	gi|685256346|ref|XP_009136992.1|	2277	0	PREDICTED: cytochrome P450 81D11 [Brassica rapa]	gi|685256345|ref|XM_009138744.1|	1466	0	PREDICTED: Brassica rapa cytochrome P450 81D11 (LOC103861008), mRNA	Q9LHA1	584
BraA01g001540.3C	43.5505	26.3119	44.8596	26.0748	25.016	26.2932	23.2003	21.7152	23.3784	21.1599	19.8682	18.415	36.9119	38.5444	36.98	28.393	25.1682	49.3822	21.7385	33.589	34.5037	31.773	27.8378	25.7761	28.5311	36.277	32.2222	19.1034	20.0273	19.9163	48.085	47.9754	43.3345	37.4957	40.0745	40.7727	BraA01g001540.3C	protein_coding	chrA01:782990-785572:+	gi|685256348|ref|XP_009137084.1|	2440	0	PREDICTED: cytochrome P450 81D1 [Brassica rapa]	gi|685256347|ref|XM_009138836.1|	1542	0	PREDICTED: Brassica rapa cytochrome P450 81D1 (LOC103861101), mRNA	Q6WNR0	453
BraA01g001550.3C	63.3451	85.4472	64.8307	63.4419	58.7685	57.9546	37.5086	33.7866	26.906	64.4353	70.144	59.3437	27.1051	30.9854	36.9007	136.637	135.979	93.3268	90.2849	55.9749	58.8078	58.37	60.1854	71.0032	61.0407	27.6739	32.1447	72.071	80.0162	77.7894	38.9141	37.689	37.5662	37.5626	40.6653	52.7544	BraA01g001550.3C	protein_coding	chrA01:786025-786749:-	gi|685256350|ref|XP_009137164.1|	796	6e-106	PREDICTED: uncharacterized protein LOC103861189 [Brassica rapa]	gi|923905927|ref|XM_013867545.1|	519	0	PREDICTED: Brassica napus uncharacterized LOC106426815 (LOC106426815), mRNA	.	.
BraA01g001560.3C	0	0	0	0	1.51024	0.312147	0.64683	0.353306	1.12542	0.342362	0.358173	1.01154	0.350567	0	0	1.40147	3.61858	0.43374	0	0	0	0	0	0.378282	0.712169	0.357923	0	0.327217	0.92351	0.653534	0	0.351153	0	0	1.44044	0.349193	BraA01g001560.3C	protein_coding	chrA01:787650-787913:-	gi|685256352|ref|XP_009137259.1|	442	6e-55	PREDICTED: uncharacterized protein LOC103861271 [Brassica rapa]	gi|923905929|ref|XM_013867547.1|	264	4e-135	PREDICTED: Brassica napus uncharacterized LOC106426816 (LOC106426816), mRNA	.	.
BraA01g001570.3C	15.2912	15.9587	19.4236	10.0341	13.1356	10.8598	42.6908	48.0824	33.3962	47.9944	59.007	51.7532	36.5894	29.5253	28.0872	29.6374	27.3077	46.6018	29.2935	21.6937	25.3754	26.093	16.3408	16.6444	35.3435	61.8958	81.5319	68.3047	74.969	83.9259	62.3346	70.4265	58.5911	227.654	233.987	143.997	BraA01g001570.3C	protein_coding	chrA01:791570-791827:+	gi|685256354|ref|XP_009137358.1|	270	5e-29	PREDICTED: uncharacterized protein LOC103861371 [Brassica rapa]	gi|923905936|ref|XM_013867550.1|	258	8e-132	PREDICTED: Brassica napus uncharacterized LOC106426819 (LOC106426819), mRNA	F4JRC5	63.9
BraA01g001580.3C	19.6329	34.0809	18.47	36.9853	34.254	32.4014	29.8703	33.4011	35.7718	31.8068	35.8129	35.4592	29.6083	28.5333	31.7829	68.4741	63.7117	48.5681	45.0536	44.7413	41.299	52.4913	47.4634	50.0878	31.9175	28.8644	27.7902	58.5709	55.9405	61.4281	37.3429	38.7464	42.1912	37.744	40.5196	43.0967	BraA01g001580.3C	protein_coding	chrA01:792402-794719:+	gi|685256358|ref|XP_009137560.1|	1531	0	PREDICTED: mortality factor 4-like protein 1 [Brassica rapa]	gi|685256357|ref|XM_009139312.1|	945	0	PREDICTED: Brassica rapa mortality factor 4-like protein 1 (LOC103861562), mRNA	Q94C32	536
BraA01g001590.3C	185.021	188.329	177.524	119.26	119.47	125.489	138.929	156.494	148.806	181.775	177.14	181.097	146.279	150.832	146.489	144.697	146.393	140.611	184.495	168.861	163.398	126.656	128.629	127.793	148.581	153.657	146.614	160.08	153.233	155.052	157.636	151.502	161.249	101.207	117.512	122.262	BraA01g001590.3C	protein_coding	chrA01:799453-800439:-	gi|937575684|ref|NP_001303071.1|	1540	0	transcription factor MYB44 [Brassica napus]	gi|685256359|ref|XM_009139413.1|	987	0	PREDICTED: Brassica rapa transcription factor MYB44 (LOC103861662), mRNA	O23160	504
BraA01g001600.3C	0	0	0	0	0	0	0	0	0	0	0	0	0	0	0	0	0	0	0	0	0	0	0.414791	0	0	0	0	0	0.703627	0.373448	0	0	0	0	0	0	BraA01g001600.3C	protein_coding	chrA01:808892-809865:-	gi|674861935|emb|CDY69047.1|	116	2e-06	BnaCnng61580D [Brassica napus]	gi|199580171|gb|AC189475.2|	132	8e-62	Brassica rapa subsp. pekinensis clone KBrB080J22, complete sequence	.	.
BraA01g001610.3C	0.882065	0.450277	0.743768	3.53894	4.18587	3.60484	2.95063	2.16249	2.12284	4.38871	4.38457	4.12758	1.9433	1.31644	1.69819	2.8054	2.45513	2.50453	2.87824	1.51566	1.29077	4.29462	5.78421	5.0239	4.81135	2.81078	2.41943	4.04341	4.69269	3.54727	3.68118	3.81199	3.41904	7.61687	7.23622	7.05718	BraA01g001610.3C	protein_coding	chrA01:819023-821402:+	gi|685256362|ref|XP_009137739.1|	3351	0	PREDICTED: probable LRR receptor-like serine/threonine-protein kinase At4g37250 [Brassica rapa]	gi|685256361|ref|XM_009139491.1|	2286	0	PREDICTED: Brassica rapa probable LRR receptor-like serine/threonine-protein kinase At4g37250 (LOC103861759), mRNA	C0LGS3	1047
BraA01g001620.3C	2.182	4.49857	2.22723	2.01351	3.01243	3.88227	2.35273	2.65309	1.23246	1.52648	1.59698	2.2155	1.64533	2.42423	1.53365	0.219253	0.318435	0.407137	5.21631	11.1347	14.3436	5.984	4.93988	4.88236	7.77119	14.8667	15.6354	2.61076	2.81732	3.83407	4.65432	6.01548	5.57326	10.3677	10.5632	10.3249	BraA01g001620.3C	protein_coding	chrA01:822110-823905:-	gi|685256364|ref|XP_009137836.1|	1949	0	PREDICTED: cysteine proteinase COT44 [Brassica rapa]	gi|685256363|ref|XM_009139588.1|	1125	0	PREDICTED: Brassica rapa cysteine proteinase COT44 (LOC103861845), mRNA	P25251	642
BraA01g001630.3C	12.2749	6.39064	11.8397	19.4326	20.2937	20.8001	10.4739	7.72779	8.26897	20.6077	20.6485	20.2386	21.5177	22.8918	23.1599	17.1885	13.3448	13.0908	14.0481	15.7483	14.9832	19.2165	18.8926	17.2537	24.0299	22.8188	21.0222	22.6921	23.3837	20.5001	20.2377	22.7444	22.3963	21.5637	22.775	23.3872	BraA01g001630.3C	protein_coding	chrA01:826983-829176:-	gi|685256366|ref|XP_009137940.1|	2183	0	PREDICTED: probable beta-1,4-xylosyltransferase IRX14 [Brassica rapa]	gi|685256365|ref|XM_009139692.1|	1557	0	PREDICTED: Brassica rapa probable beta-1,4-xylosyltransferase IRX14 (LOC103861947), mRNA	Q8L707	676
BraA01g001640.3C	38.6164	18.3809	36.221	51.4569	51.3636	50.4531	32.8167	32.0427	27.791	35.8153	32.6449	30.126	65.32	71.1724	69.9827	27.4765	28.0256	53.1641	44.9108	44.8737	42.6546	52.6335	71.2107	70.1442	68.2665	42.7463	44.2551	25.563	21.5611	23.3272	73.6248	80.4068	74.3497	98.614	105.578	98.7717	BraA01g001640.3C	protein_coding	chrA01:836587-837174:+	gi|685256368|ref|XP_009138039.1|	832	1e-110	PREDICTED: ethylene-responsive transcription factor RAP2-10-like [Brassica rapa]	gi|923659638|ref|XM_013791688.1|	588	0	PREDICTED: Brassica napus ethylene-responsive transcription factor RAP2-10-like (LOC106351991), mRNA	Q9SW63	246
BraA01g001670.3C	75.6962	25.7466	76.9893	50.0632	47.3769	54.1748	41.9661	49.5871	47.1495	47.0051	42.0257	44.4391	88.5507	91.5038	90.994	31.2131	32.7096	70.5068	33.6859	45.5173	50.7293	49.708	52.2704	55.4043	77.5407	64.3069	66.4627	31.5946	34.6772	31.2183	86.9366	82.0462	82.0454	60.1697	61.8388	66.1527	BraA01g001670.3C	protein_coding	chrA01:854524-856664:+	gi|923647728|ref|XP_013643407.1|	2076	0	PREDICTED: floral homeotic protein APETALA 2-like isoform X1 [Brassica napus]	gi|923647731|ref|XM_013787954.1|	1246	0	PREDICTED: Brassica napus floral homeotic protein APETALA 2-like (LOC106348248), transcript variant X2, mRNA	P47927	675
BraA01g001680.3C	0	0	0.359386	0	0	0.330951	0	0	0.795477	0	0	0	0	0	0	0	0.959142	0.919738	1.07126	0.713582	1.11095	1.50201	1.53922	1.20321	1.51014	1.13845	0.364133	0	0.652762	0.692903	2.25306	0.744613	1.37975	1.67293	0.763606	1.11069	BraA01g001680.3C	protein_coding	chrA01:863734-864581:-	gi|923800744|ref|XP_013687307.1|	118	2e-06	PREDICTED: ribosomal protein S14, mitochondrial-like [Brassica napus]	gi|199580120|gb|AC232512.1|	127	5e-59	Brassica rapa subsp. pekinensis clone KBrB065B14, complete sequence	.	.
BraA01g001690.3C	0.493913	1.1276	0.672203	1.29136	0.842332	0.928526	2.08443	2.36466	1.85985	0.763805	1.24301	1.00299	0.69521	0.794734	1.13404	0.694815	0.784876	1.1827	1.16883	0.66735	0.865814	0.877935	0.989656	0.656399	0	0.975971	0.766217	1.37892	1.22094	0.891015	0.0877952	0.0870463	0.322589	0.938725	0.446333	0.519363	BraA01g001690.3C	protein_coding	chrA01:869261-870972:+	gi|685256374|ref|XP_009138272.1|	1521	0	PREDICTED: transcription factor SPATULA [Brassica rapa]	gi|685256373|ref|XM_009140024.1|	1065	0	PREDICTED: Brassica rapa transcription factor SPATULA (LOC103862298), mRNA	Q9FUA4	396
BraA01g001700.3C	9.30203	30.9283	10.8393	4.70968	5.70914	5.64853	23.4098	21.895	25.6659	104.047	92.2493	101.553	14.1649	14.3052	15.3095	6.48494	8.63363	4.73082	22.6252	15.1822	15.4981	5.09202	5.93794	4.31348	10.2392	10.9131	9.45001	47.4511	43.1145	49.0058	12.3791	14.7979	13.8713	42.6338	39.9914	37.221	BraA01g001700.3C	protein_coding	chrA01:873081-874145:-	gi|685256376|ref|XP_009138381.1|	1661	0	PREDICTED: mitogen-activated protein kinase kinase kinase NPK1 [Brassica rapa]	gi|923906011|ref|XM_013867580.1|	1065	0	PREDICTED: Brassica napus mitogen-activated protein kinase kinase kinase NPK1-like (LOC106426850), mRNA	O80888	160
BraA01g001710.3C	0	2.00148	0.894871	1.34833	0.332253	0.549378	1.70763	1.55454	0.990369	0.903836	0.945578	0	0.925498	1.56739	2.30048	2.87769	1.19413	2.67184	0.889143	2.07295	1.53682	0.623334	1.59694	2.33022	0.940063	0.944918	0.30223	0	0.270896	0.287555	2.49338	1.23606	0.858893	2.22165	2.53517	1.84374	BraA01g001710.3C	protein_coding	chrA01:875767-876461:+	gi|674958235|emb|CDX75627.1|	365	6e-43	BnaA01g00750D [Brassica napus]	gi|685256377|ref|XM_009140226.1|	258	9e-132	PREDICTED: Brassica rapa uncharacterized LOC103862488 (LOC103862488), transcript variant X1, mRNA	.	.
BraA01g001720.3C	1.60494	3.00975	1.09214	2.71518	2.58504	3.01718	2.4097	3.77075	2.79509	3.92972	2.16379	3.25915	3.31796	2.65417	2.69793	1.88146	2.64148	2.44562	3.39109	2.03297	1.96938	2.92411	3.43508	3.42791	1.72094	1.94605	1.52152	2.56982	3.28547	2.17147	1.71171	1.90924	1.44131	1.7158	1.30529	1.40636	BraA01g001720.3C	protein_coding	chrA01:877179-878773:-	gi|685256381|ref|XP_009138587.1|	1612	0	PREDICTED: uncharacterized protein LOC103862622 [Brassica rapa]	gi|685256380|ref|XM_009140339.1|	689	0	PREDICTED: Brassica rapa uncharacterized LOC103862622 (LOC103862622), mRNA	.	.
BraA01g001730.3C	109.572	142.039	113.652	114.622	115.45	109.876	106.885	110.734	109.374	73.8894	71.4436	70.9127	84.0738	79.0346	79.0644	87.1198	92.7161	110.112	74.3049	78.0723	78.3623	77.5075	91.042	91.6618	58.9993	64.6489	61.7893	49.9697	59.5424	55.5939	56.416	59.3682	61.4238	91.5589	89.8193	88.0897	BraA01g001730.3C	protein_coding	chrA01:881170-884107:-	gi|674964813|emb|CDX69275.1|	1881	0	BnaC01g01780D [Brassica napus]	gi|923906004|ref|XM_013867577.1|	833	0	PREDICTED: Brassica napus CLK4-associating serine/arginine rich protein-like (LOC106426848), transcript variant X1, mRNA	A0JNI5	80.1
BraA01g001740.3C	1029.12	1421.36	1031.34	1106.57	1133.37	1108.71	1888.61	2015.71	1928.4	401.425	427.871	400.415	1108.77	1136.17	1091.12	645.583	649.908	1073.26	619.509	1008.1	1065.49	1239.93	1576.8	1573.27	1186.49	1322.45	1302.12	208.689	202.653	199.485	751.925	801.284	790.361	2231.33	2287.95	2095.78	BraA01g001740.3C	protein_coding	chrA01:888802-889805:+	gi|685256385|ref|XP_009138768.1|	1058	4e-142	PREDICTED: heat stress transcription factor B-1 [Brassica rapa]	gi|685256384|ref|XM_009140520.1|	861	0	PREDICTED: Brassica rapa heat stress transcription factor B-1 (LOC103862791), mRNA	Q96320	343
BraA01g001750.3C	10.7132	5.82334	11.1783	8.62275	7.51122	8.00011	13.1579	7.21866	5.37878	8.28363	9.88588	9.48774	9.36179	8.1083	9.95625	4.43753	3.40486	4.43104	41.107	67.068	67.9205	51.7329	46.5748	52.4756	52.0768	40.4781	39.5792	19.0013	18.3724	19.9707	33.0716	37.258	33.9359	21.3229	18.7169	20.2148	BraA01g001750.3C	protein_coding	chrA01:890948-893644:+	gi|674964811|emb|CDX69273.1|	2258	0	BnaC01g01800D [Brassica napus]	gi|685256386|ref|XM_009140630.1|	958	0	PREDICTED: Brassica rapa red chlorophyll catabolite reductase, chloroplastic (LOC103862886), mRNA	Q8LDU4	476
BraA01g001760.3C	4.4831	3.89899	3.89811	4.82643	4.43634	6.32097	6.71086	5.12293	5.81466	8.1311	8.77525	7.50226	8.23833	9.08375	8.00593	9.22637	10.8557	10.0845	8.08312	6.89863	6.37431	8.23438	9.07355	8.79505	8.54603	6.44262	5.06579	7.93502	8.38855	8.9044	6.99493	7.02306	8.9468	8.20495	5.5817	6.80926	BraA01g001760.3C	protein_coding	chrA01:895537-897473:+	gi|685256393|ref|XP_009139195.1|	1877	0	PREDICTED: methionine aminopeptidase 1D, chloroplastic/mitochondrial [Brassica rapa]	gi|685256392|ref|XM_009140947.1|	1056	0	PREDICTED: Brassica rapa methionine aminopeptidase 1D, chloroplastic/mitochondrial (LOC103863158), mRNA	Q9FV50	655
BraA01g001770.3C	0.0707583	0.207694	0.0722252	0.130589	0	0	0.206735	0	0	0.218847	0.228953	0.0718447	0.0746972	0.0759028	0.0696271	0	0	0	0.143526	0.430222	0.148844	0.0754641	0	0	0.0758727	0.0762645	0.146358	0	0.327962	0.348129	0.0754656	0.0748219	0.207964	0	0.153461	0.0744043	BraA01g001770.3C	protein_coding	chrA01:897660-900061:-	gi|685256391|ref|XP_009139093.1|	2079	0	PREDICTED: patatin-like protein 3 [Brassica rapa]	gi|685256390|ref|XM_009140845.1|	1186	0	PREDICTED: Brassica rapa patatin-like protein 3 (LOC103863070), mRNA	O23181	632
BraA01g001780.3C	0	0	0	0	0	0	0.0745039	0.16278	0	0	0	0	0	0	0	0	0	0	0	0.0775226	0.0804617	0	0	0.0871434	0	0.0824535	0	0	0	0.376381	0.16318	0	0.149894	0	0.165914	0.241327	BraA01g001780.3C	protein_coding	chrA01:902154-904367:-	gi|685256395|ref|XP_009139287.1|	1779	0	PREDICTED: patatin-like protein 1 [Brassica rapa]	gi|923520059|ref|XM_013809818.1|	1144	0	PREDICTED: Brassica napus patatin-like protein 1 (LOC106369695), mRNA	O23179	590
BraA01g001790.3C	1.78626	1.11854	1.31277	0.263733	0.568649	0.268644	2.01798	2.12847	1.29143	4.41974	3.54495	4.06265	0.905132	1.22632	1.05462	0.201026	0.486606	0.186646	4.56528	4.3443	3.7575	0.914426	1.32753	1.46503	3.67751	3.00341	2.9558	3.52018	4.04026	3.86688	3.35296	3.77768	4.40996	1.29008	2.09198	0.901584	BraA01g001790.3C	protein_coding	chrA01:906281-908731:-	gi|685256397|ref|XP_009139351.1|	1957	0	PREDICTED: patatin-like protein 1 isoform X1 [Brassica rapa]	gi|685256396|ref|XM_009141103.1|	1227	0	PREDICTED: Brassica rapa patatin-like protein 1 (LOC103863326), transcript variant X1, mRNA	O23179	662
BraA01g001800.3C	1.22206	3.17118	2.00668	6.07976	4.83277	6.8922	2.32859	2.26116	2.70101	2.68412	3.55308	3.77642	2.91672	2.33684	3.03245	6.12911	7.16479	4.1639	6.52039	4.79203	4.47075	8.27334	11.9626	13.0129	5.69735	4.35235	4.34112	4.3978	4.08807	4.13033	4.53342	5.0566	6.45471	5.09969	5.35843	4.97251	BraA01g001800.3C	protein_coding	chrA01:914976-917507:+	gi|685256403|ref|XP_009139537.1|	2545	0	PREDICTED: uncharacterized protein LOC103863524 [Brassica rapa]	gi|685256406|ref|XM_009141419.1|	1590	0	PREDICTED: Brassica rapa uncharacterized LOC103863524 (LOC103863524), transcript variant X3, mRNA	.	.
BraA01g001810.3C	10.4731	14.2137	10.3453	22.0306	22.0862	20.4826	21.8252	21.1466	21.3085	9.28798	12.5105	11.4914	20.4477	19.0865	19.5585	38.3376	35.3561	29.491	18.7308	17.6312	16.1085	23.4801	24.9234	25.0788	24.5733	16.5072	19.6246	13.1492	13.5709	14.7379	19.5171	18.2789	20.0794	19.1558	18.3788	24.4529	BraA01g001810.3C	protein_coding	chrA01:918196-920835:+	gi|685258235|ref|XP_009129819.1|	1633	0	PREDICTED: F-box protein At1g30790-like [Brassica rapa]	gi|199580120|gb|AC232512.1|	629	0	Brassica rapa subsp. pekinensis clone KBrB065B14, complete sequence	.	.
BraA01g001820.3C	1.20757	1.04648	0.669128	1.24168	1.29449	1.00536	1.27686	0.844263	0.857462	1.45837	1.41409	0.910824	0.364226	0.481136	0.679008	1.79583	1.55082	0.946342	4.51395	4.09067	3.95545	3.56927	3.84624	3.77299	1.81279	2.41714	1.53434	3.63764	2.52666	3.25918	2.53901	2.37142	2.33229	3.541	3.59174	3.7731	BraA01g001820.3C	protein_coding	chrA01:921277-923817:-	gi|685256413|ref|XP_009139866.1|	3923	0	PREDICTED: uncharacterized protein LOC103863824 [Brassica rapa]	gi|685256412|ref|XM_009141618.1|	2541	0	PREDICTED: Brassica rapa uncharacterized LOC103863824 (LOC103863824), mRNA	Q16P90	78.2
BraA01g001830.3C	10.9493	8.79204	10.4055	14.7028	14.3375	13.2731	12.3549	11.9704	10.407	11.5996	15.8003	14.1075	19.7695	17.7395	17.4616	22.4139	18.5137	17.1613	14.7808	14.0033	14.6931	15.7847	15.5981	14.795	13.603	12.8593	11.402	9.82159	10.6399	8.1734	10.8723	14.0534	13.3901	13.2036	13.9205	15.4042	BraA01g001830.3C	protein_coding	chrA01:926015-927528:-	gi|685256416|ref|XP_009139953.1|	2000	0	PREDICTED: cell division cycle-associated 7-like protein [Brassica rapa]	gi|685256415|ref|XM_009141705.1|	1161	0	PREDICTED: Brassica rapa cell division cycle-associated 7-like protein (LOC103863912), mRNA	Q96GN5	118
BraA01g001840.3C	2.43527	1.23548	2.02543	3.24599	4.51208	2.96732	1.40546	1.82323	1.32457	6.78807	5.44777	6.86848	22.7566	19.8343	18.9931	22.712	26.5363	24.7392	0	0	0	0	0	0	0	0	0	0	0	0	0	0	0	0	0	0	BraA01g001840.3C	protein_coding	chrA01:929032-930855:+	gi|685256419|ref|XP_009140048.1|	1723	0	PREDICTED: putative glucose-6-phosphate 1-epimerase [Brassica rapa]	gi|685256418|ref|XM_009141800.1|	972	0	PREDICTED: Brassica rapa putative glucose-6-phosphate 1-epimerase (LOC103864004), mRNA	Q40784	356
BraA01g001850.3C	11.9168	8.49575	9.90226	15.0306	14.9105	12.9464	12.7722	13.443	15.4238	15.99	14.4033	13.1334	19.9134	20.1063	20.5652	20.3865	19.2497	19.0846	6.74146	5.88632	4.91278	5.81182	4.64685	5.18432	5.00853	4.96985	4.70686	5.66461	5.38462	6.5407	5.10939	5.82568	4.04806	8.59296	3.76639	4.15597	BraA01g001850.3C	protein_coding	chrA01:931725-933636:+	gi|674958221|emb|CDX75613.1|	1562	0	BnaA01g00890D [Brassica napus]	gi|685256422|ref|XM_009141987.1|	1464	0	PREDICTED: Brassica rapa uncharacterized LOC103864202 (LOC103864202), mRNA	Q8RWH9	514
BraA01g001860.3C	5.09707	1.99483	3.93096	16.0964	12.3629	12.6698	6.72903	6.38689	8.31705	8.29101	7.08572	7.36046	21.7624	20.048	23.8519	26.7692	22.0621	23.5228	4.48018	3.0991	2.8592	0.966409	2.72347	2.83858	1.0931	1.22082	0.937148	1.33931	1.46998	2.0062	1.69125	2.39546	1.77549	3.22914	4.54464	7.38448	BraA01g001860.3C	protein_coding	chrA01:934012-935169:-	gi|685256421|ref|XP_009140147.1|	1375	0	PREDICTED: methylesterase 9-like [Brassica rapa]	gi|685256420|ref|XM_009141899.1|	774	0	PREDICTED: Brassica rapa methylesterase 9-like (LOC103864108), mRNA	O23171	409
BraA01g001870.3C	0.437801	0.160633	0.335158	0.151498	0.124439	0.257199	0.852749	1.16445	0.432745	0.73345	1.06245	0.166696	0.462171	0.997965	0.16155	0.15397	0.0745401	0.142955	0.0555021	0	0	0	0	0	0.0586806	0	0	0.16177	0.101459	0.161548	0	0	0	0	0	0	BraA01g001870.3C	protein_coding	chrA01:936159-939668:-	gi|685256425|ref|XP_009140331.1|	2757	0	PREDICTED: L-ascorbate oxidase homolog isoform X1 [Brassica rapa]	gi|922413798|ref|XM_013731917.1|	1374	0	PREDICTED: Brassica oleracea var. oleracea L-ascorbate oxidase homolog (LOC106295903), mRNA	Q00624	531
BraA01g001880.3C	0.383395	0.458482	0.652238	1.06137	1.0171	1.08114	1.3276	0.997084	0.866212	0.702691	0.505411	0.735308	0.944386	0.548359	0.922204	1.31839	2.20491	0.890242	0.604859	1.07921	0.537663	1.31754	1.35019	1.5043	0.867891	1.33152	0.660853	0.629631	0.987231	0.7126	0.772367	0.225229	0.876421	1.49783	0.785312	0.985478	BraA01g001880.3C	protein_coding	chrA01:940984-943041:-	gi|685256429|ref|XP_009140477.1|	3670	0	PREDICTED: pentatricopeptide repeat-containing protein At4g37170 [Brassica rapa]	gi|685256428|ref|XM_009142229.1|	2058	0	PREDICTED: Brassica rapa pentatricopeptide repeat-containing protein At4g37170 (LOC103864449), mRNA	O23169	1182
BraA01g001890.3C	19.4522	19.1202	17.385	23.1616	22.422	24.5198	20.8652	20.9816	20.0504	16.8199	17.5966	19.3868	39.3668	37.1174	37.3122	5.17027	6.83757	6.43957	24.2742	10.719	13.294	18.1646	28.02	25.9367	16.6289	14.5892	15.2042	10.6878	10.1378	8.29146	19.8859	16.7778	18.8816	14.1409	12.2481	18.7579	BraA01g001890.3C	protein_coding	chrA01:947936-949242:+	gi|685256431|ref|XP_009140580.1|	1597	0	PREDICTED: protein PHR1-LIKE 1 [Brassica rapa]	gi|685256430|ref|XM_009142332.1|	975	0	PREDICTED: Brassica rapa protein PHR1-LIKE 1 (LOC103864545), mRNA	F4JRB0	412
BraA01g001900.3C	0.0874946	0.25682	0	0.0807386	0	0.411211	0	0	0	0.0902032	0	0	0	0.0938558	0	0.123084	0	0.342836	0.177474	0	0.0920251	0.0933134	0.0956254	0.099667	0	0.0943032	0.0904881	0.0862129	0.324427	0.430471	0.559892	0	0.257153	1.57977	0.853913	0.184006	BraA01g001900.3C	protein_coding	chrA01:950105-951405:-	gi|685258237|ref|XP_009129831.1|	899	2e-118	PREDICTED: F-box protein At1g30790-like [Brassica rapa]	gi|199580120|gb|AC232512.1|	700	0	Brassica rapa subsp. pekinensis clone KBrB065B14, complete sequence	.	.
BraA01g001910.3C	7.85446	9.26716	8.13519	9.91266	9.45543	10.6401	14.399	7.25045	7.95948	9.64568	8.59616	6.68496	6.46263	7.18646	7.3879	15.4365	18.4076	9.95716	22.2579	21.186	23.6901	20.5725	23.9857	22.8943	9.78458	11.7025	10.8707	15.5926	13.7054	14.7755	18.6018	18.0767	22.1796	18.0015	15.9075	16.154	BraA01g001910.3C	protein_coding	chrA01:960332-961617:-	gi|685256435|ref|XP_009140776.1|	1246	9e-172	PREDICTED: thioredoxin-like protein HCF164, chloroplastic [Brassica rapa]	gi|685256434|ref|XM_009142528.1|	759	0	PREDICTED: Brassica rapa thioredoxin-like protein HCF164, chloroplastic (LOC103864728), mRNA	O23166	375
BraA01g001920.3C	5.62512	4.96679	5.11155	7.91276	7.56539	6.89947	7.81662	4.8169	5.34706	7.85022	7.02894	6.89557	10.0661	8.02093	8.43779	7.43067	6.07344	5.01754	3.54823	2.64159	2.74174	3.21909	4.12357	3.04756	2.50095	1.55268	1.77365	2.23061	3.87903	2.70005	2.48753	3.11916	2.15059	7.10563	2.0085	3.10175	BraA01g001920.3C	protein_coding	chrA01:961968-963726:+	gi|685256437|ref|XP_009140872.1|	1625	0	PREDICTED: nuclear autoantigenic sperm protein [Brassica rapa]	gi|685256436|ref|XM_009142624.1|	1224	0	PREDICTED: Brassica rapa nuclear autoantigenic sperm protein (LOC103864825), mRNA	.	.
BraA01g001930.3C	0	0.185666	0	0.525325	0	0.356739	0.739234	0.605667	0.214366	0.195636	0.409341	0.385349	0	0	0	0	0	0	0	0	0	0.202381	0	0	0	0	0	0.186981	0	0	0	0	0	0	0	0.399078	BraA01g001930.3C	protein_coding	chrA01:964343-965848:+	gi|685256439|ref|XP_009140967.1|	669	3e-87	PREDICTED: CASP-like protein At4g37235 [Brassica rapa]	gi|685256438|ref|XM_009142719.1|	462	0	PREDICTED: Brassica rapa CASP-like protein At4g37235 (LOC103864917), mRNA	Q66GI1	211
BraA01g001950.3C	4.31706	6.49832	6.27087	14.8623	11.8932	13.4223	10.3493	7.24276	10.1288	22.4247	21.1322	24.4456	8.23833	8.01507	8.98624	3.03653	6.78484	4.77114	21.3866	11.1051	11.5261	11.8646	14.1547	15.6987	10.6825	7.51639	6.52542	30.104	24.3191	26.9583	11.6877	14.0461	10.7362	11.8341	12.2437	17.4596	BraA01g001950.3C	protein_coding	chrA01:972278-972805:+	gi|685256441|ref|XP_009141055.1|	602	2e-76	PREDICTED: uncharacterized protein LOC103864993 [Brassica rapa]	gi|685256440|ref|XM_009142807.1|	528	0	PREDICTED: Brassica rapa uncharacterized LOC103864993 (LOC103864993), mRNA	.	.
BraA01g001960.3C	11.3248	13.6913	12.0911	13.2131	14.2817	13.6427	9.69812	11.3561	10.7345	13.0174	11.8636	13.2829	17.658	14.871	16.1392	21.3332	24.1131	19.8071	11.8156	12.2676	11.7743	11.3838	10.9545	9.34162	7.04873	7.36573	7.47161	7.82406	9.95498	10.375	7.9133	8.39638	7.90666	7.66939	7.4813	9.85517	BraA01g001960.3C	protein_coding	chrA01:976218-978588:+	gi|685256447|ref|XP_009141323.1|	2332	0	PREDICTED: cytoplasmic tRNA 2-thiolation protein 2 [Brassica rapa]	gi|685256446|ref|XM_009143075.1|	1347	0	PREDICTED: Brassica rapa cytoplasmic tRNA 2-thiolation protein 2 (LOC103865246), mRNA	O65628	741
BraA01g001970.3C	2.36235	3.12464	1.83082	2.54327	2.03928	2.38502	0.979927	1.34975	0.988392	1.89427	1.74583	1.55466	3.37132	2.53411	2.79811	4.43101	3.51566	2.28558	3.59384	3.63521	2.43867	2.28618	4.78127	4.03651	2.76765	1.74461	1.85501	2.50017	3.12261	3.40072	2.70614	2.6368	2.87155	1.87077	2.18222	3.49611	BraA01g001970.3C	protein_coding	chrA01:978813-983239:-	gi|685256443|ref|XP_009141155.1|	2691	0	PREDICTED: BEL1-like homeodomain protein 2 [Brassica rapa]	gi|685256444|ref|XM_009142973.1|	2004	0	PREDICTED: Brassica rapa BEL1-like homeodomain protein 2 (LOC103865094), transcript variant X2, mRNA	Q9SW80	739
BraA01g001980.3C	12.3959	10.7222	12.5918	11.9637	13.3786	12.468	10.5269	12.0732	11.2972	11.4214	11.5614	12.0086	11.1262	10.5671	11.6674	11.499	9.99189	13.805	14.3332	16.4149	16.061	22.3851	19.0455	19.5094	12.5213	11.3274	11.0549	12.4798	12.5178	12.4332	13.6676	12.7278	11.4108	12.235	13.02	14.3255	BraA01g001980.3C	protein_coding	chrA01:993314-1001376:+	gi|685256449|ref|XP_009141421.1|	2514	0	PREDICTED: protein DA1-related 1 [Brassica rapa]	gi|685256448|ref|XM_009143173.1|	1692	0	PREDICTED: Brassica rapa protein DA1-related 1 (LOC103865341), mRNA	Q8W4F0	773
BraA01g001990.3C	86.4373	57.9603	91.284	77.8948	73.3559	84.4751	56.7496	63.7738	64.6325	12.16	13.7659	17.0702	25.2746	28.0431	25.2048	8.04863	7.67314	15.0607	100.073	118.098	109.614	84.3003	77.0574	79.111	53.3269	64.4176	66.7273	15.6985	13.1368	14.984	22.9061	28.4815	20.7824	16.3111	14.0313	17.0305	BraA01g001990.3C	protein_coding	chrA01:1002109-1003211:-	gi|685256453|ref|XP_009141598.1|	1614	0	PREDICTED: uncharacterized protein LOC103865519 [Brassica rapa]	gi|685256452|ref|XM_009143350.1|	996	0	PREDICTED: Brassica rapa uncharacterized LOC103865519 (LOC103865519), mRNA	Q1PE15	470
BraA01g002000.3C	17.9032	12.9609	19.0119	27.7075	26.6533	24.3749	7.34969	10.2497	11.518	9.02181	11.863	10.5156	21.1034	21.7024	20.698	20.6679	16.9497	21.0769	22.7171	29.7764	30.3142	27.228	24.0419	26.8871	26.6868	20.7674	20.6745	8.22717	10.7168	12.0078	34.5923	36.4196	36.4164	27.2366	24.899	28.7873	BraA01g002000.3C	protein_coding	chrA01:1005448-1006539:-	gi|923503874|ref|XP_013738757.1|	1839	0	PREDICTED: geranylgeranyl pyrophosphate synthase, chloroplastic/chromoplastic-like [Brassica napus]	gi|685256454|ref|XM_009143462.1|	1092	0	PREDICTED: Brassica rapa geranylgeranyl pyrophosphate synthase, chloroplastic/chromoplastic (LOC103865611), mRNA	Q43133	633
BraA01g002010.3C	182.252	203.223	189.398	161.8	172.736	163.337	146.893	158.129	147.845	136.223	153.529	154.581	172.328	180.166	182.585	125.319	147.448	148.777	178.147	174.498	181.113	168.066	182.533	163.043	174.367	156.301	169.801	168.126	180.161	180.727	206.944	223.454	219.495	209.175	205.812	210.477	BraA01g002010.3C	protein_coding	chrA01:1007776-1008678:+	gi|685256459|ref|XP_009141932.1|	997	4e-136	PREDICTED: NEDD8-conjugating enzyme Ubc12 [Brassica rapa]	gi|685256458|ref|XM_009143684.1|	558	0	PREDICTED: Brassica rapa NEDD8-conjugating enzyme Ubc12 (LOC103865798), mRNA	Q9SDY5	374
BraA01g002020.3C	1.8602	1.87877	1.83752	1.77194	1.50094	1.63573	1.87009	1.08531	0.610083	1.11356	1.29443	1.82783	1.96375	1.60923	1.77142	1.1818	0.735605	1.25402	2.55606	2.67556	2.777	2.23991	1.83632	1.57216	1.93031	0.776113	1.86179	1.18255	1.39064	1.23997	1.98396	1.77667	1.52849	1.76774	0.715783	1.07267	BraA01g002020.3C	protein_coding	chrA01:1008897-1010959:-	gi|685256457|ref|XP_009141825.1|	2445	0	PREDICTED: uncharacterized protein LOC103865702 [Brassica rapa]	gi|685256456|ref|XM_009143577.1|	1461	0	PREDICTED: Brassica rapa uncharacterized LOC103865702 (LOC103865702), mRNA	.	.
BraA01g002030.3C	152.557	154.249	152.972	230.991	227.331	235.202	143.894	151.568	153.985	66.9949	73.0956	75.2533	189.463	199.121	194.67	223.67	221.412	175.528	131.422	160.829	150.548	159.012	160.115	157.355	145.957	125.575	134.811	89.1322	81.6253	83.3342	229.551	219.766	223.764	247.286	262.378	247.449	BraA01g002030.3C	protein_coding	chrA01:1013576-1014891:+	gi|685256461|ref|XP_009142040.1|	1171	1e-158	PREDICTED: BES1/BZR1 homolog protein 2 [Brassica rapa]	gi|685256460|ref|XM_009143792.1|	912	0	PREDICTED: Brassica rapa BES1/BZR1 homolog protein 2 (LOC103865897), mRNA	Q94A43	416
BraA01g002060.3C	8.84864	4.21785	8.24467	9.21223	8.77066	9.68236	6.84997	5.06917	5.94631	9.12257	10.0822	10.8275	9.2454	8.46976	7.90343	8.04324	9.45664	8.53471	8.69814	6.94357	7.97046	6.00104	7.14162	7.70191	7.83386	8.26558	7.50882	8.71902	6.64621	6.3405	6.63031	7.10157	4.57898	7.15826	5.36362	5.24874	BraA01g002060.3C	protein_coding	chrA01:1020048-1023050:-	gi|685256465|ref|XP_009142233.1|	3393	0	PREDICTED: probable Xaa-Pro aminopeptidase P [Brassica rapa]	gi|685256464|ref|XM_009143985.1|	1876	0	PREDICTED: Brassica rapa probable Xaa-Pro aminopeptidase P (LOC103866076), mRNA	F4JQH3	1176
BraA01g002070.3C	24.085	37.7045	32.1236	40.3019	39.4323	40.7506	53.4807	42.3656	41.3561	4.30398	10.391	8.15161	25.7648	32.3813	31.284	38.3994	31.931	45.2996	26.3812	33.1933	35.8028	40.7564	44.925	42.0682	33.0572	33.574	32.5479	12.9736	13.6937	9.79583	40.4147	45.8428	40.2704	61.9498	47.7086	48.2884	BraA01g002070.3C	protein_coding	chrA01:1023394-1024573:-	gi|685328160|ref|XP_009102313.1|	334	2e-38	PREDICTED: P25 protein-like [Brassica rapa]	gi|923503885|ref|XM_013883654.1|	224	7e-113	PREDICTED: Brassica napus probable NAD(P)H dehydrogenase (quinone) FQR1-like 2 (LOC106441873), mRNA	O23207	134
BraA01g002080.3C	4.82585	7.6072	2.59978	4.32952	4.7247	5.41818	11.2275	10.6964	11.206	3.04043	1.735	3.81106	4.10389	3.30734	5.27633	1.6972	3.46919	3.67684	7.74942	7.19965	4.65276	8.14909	7.17893	5.95533	5.17466	3.46759	3.60458	2.64175	2.48529	2.37431	4.14611	3.68549	4.33386	1.40127	0.872192	0.845752	BraA01g002080.3C	protein_coding	chrA01:1032149-1034762:+	gi|923520107|ref|XP_013665374.1|	832	5e-110	PREDICTED: homeobox-leucine zipper protein ATHB-40 [Brassica napus]	gi|923520106|ref|XM_013809920.1|	654	0	PREDICTED: Brassica napus homeobox-leucine zipper protein ATHB-40 (LOC106369808), mRNA	O23208	291
BraA01g002090.3C	138.205	234.022	140.88	77.8943	89.4121	87.5681	126.259	117.631	117.33	57.6651	59.0233	57.9262	47.7486	50.2165	42.1266	44.9067	44.368	38.0476	119.874	130.055	132.636	100.944	103.242	110.786	72.3509	71.4205	70.5525	110.228	110.602	104.948	60.6472	63.8695	62.0919	96.4896	99.2068	87.3917	BraA01g002090.3C	protein_coding	chrA01:1038107-1039828:+	gi|685256473|ref|XP_009142677.1|	1442	0	PREDICTED: G-box-binding factor 1 [Brassica rapa]	gi|685256472|ref|XM_009144429.1|	942	0	PREDICTED: Brassica rapa G-box-binding factor 1 (LOC103866462), mRNA	P42774	476
BraA01g002100.3C	2.65665	5.88269	4.13896	3.09665	2.38459	2.23431	3.54054	5.35537	6.31814	2.01814	2.11134	2.55547	1.18086	1.04993	0.412765	1.77028	2.28542	1.46102	2.83618	2.26707	3.08834	4.62281	7.48807	5.73395	1.34937	1.95916	2.45833	3.16884	3.62923	3.16448	2.08776	1.9221	1.7808	5.44782	3.94225	6.1752	BraA01g002100.3C	protein_coding	chrA01:1039989-1041393:-	gi|685256471|ref|XP_009142559.1|	1051	1e-143	PREDICTED: HVA22-like protein k [Brassica rapa]	gi|685256470|ref|XM_009144311.1|	627	0	PREDICTED: Brassica rapa HVA22-like protein k (LOC103866366), mRNA	Q6NLY8	307
BraA01g002110.3C	53.7885	97.452	51.9728	25.6125	29.453	26.6292	41.4479	42.5633	41.2293	46.639	47.4853	46.1922	17.1763	19.8491	16.5127	16.3363	16.8604	18.0845	30.0264	27.6739	25.1663	38.2438	41.9808	43.0283	50.0136	46.4206	41.4412	66.3294	65.3582	62.3454	27.2884	26.6508	27.5046	53.7828	57.0137	46.9657	BraA01g002110.3C	protein_coding	chrA01:1041672-1043045:-	gi|685256469|ref|XP_009142446.1|	2274	0	PREDICTED: scarecrow-like protein 15 [Brassica rapa]	gi|685256468|ref|XM_009144198.1|	1374	0	PREDICTED: Brassica rapa scarecrow-like protein 15 (LOC103866272), mRNA	O23210	750
BraA01g002120.3C	0.942684	2.62513	0.592139	3.01117	3.21535	2.59012	2.82486	4.47462	3.27665	0.598072	0.234635	0.589019	0.842058	0.544504	0.285419	0.918087	1.08647	3.0308	0.294175	0.293932	0.457614	0.309347	1.10954	1.23904	0.311022	0.390785	0.599961	0.0714519	0.0672199	0.142707	0.232015	0.230036	0.284166	0.620187	0.471806	0.457503	BraA01g002120.3C	protein_coding	chrA01:1049551-1051507:+	gi|674958197|emb|CDX75589.1|	1504	0	BnaA01g01130D [Brassica napus]	gi|685258238|ref|XM_009131595.1|	558	0	PREDICTED: Brassica rapa splicing factor U2af large subunit A-like (LOC103854638), mRNA	O23212	510
BraA01g002130.3C	128.761	22.7864	125.03	47.0109	46.9737	44.5186	54.7401	56.9404	57.0442	29.6661	27.5341	25.9202	65.4822	64.137	59.4951	21.1062	26.3838	61.2753	23.6196	34.3791	35.8002	26.9872	22.6387	23.9781	52.826	51.2886	48.5189	17.6522	15.5687	11.6785	24.5995	29.1255	25.7777	41.8155	33.1466	33.7901	BraA01g002130.3C	protein_coding	chrA01:1053848-1054777:+	gi|674958196|emb|CDX75588.1|	1318	5e-179	BnaA01g01140D [Brassica napus]	gi|685256474|ref|XM_009144535.1|	776	0	PREDICTED: Brassica rapa probable polyol transporter 6 (LOC103866561), mRNA	Q8GXR2	454
BraA01g002140.3C	98.361	71.1328	109.373	75.7479	72.6635	67.6673	151.442	132.452	135.672	24.4942	21.0128	21.7111	64.0826	64.3523	68.7338	82.5541	77.3435	196.742	40.1199	58.3846	65.346	66.641	79.5876	79.027	61.6518	48.0141	52.3374	16.2704	16.8484	16.5987	38.5157	34.4187	35.3799	90.4238	69.8203	86.8156	BraA01g002140.3C	protein_coding	chrA01:1054780-1055517:+	gi|685256475|ref|XP_009142783.1|	1183	2e-158	PREDICTED: LOW QUALITY PROTEIN: probable polyol transporter 6 [Brassica rapa]	gi|685256474|ref|XM_009144535.1|	738	0	PREDICTED: Brassica rapa probable polyol transporter 6 (LOC103866561), mRNA	Q8GXR2	424
BraA01g002150.3C	10.4731	9.42068	11.3799	9.50849	12.0994	13.0199	17.1092	12.041	9.92277	9.40408	8.38084	10.6338	12.661	13.0465	14.4611	25.1887	20.2473	26.2551	6.85274	4.96414	5.68534	11.1696	8.12319	5.77262	11.0489	4.73369	6.11448	8.98807	7.82937	9.47435	9.90868	11.789	11.9153	11.2367	7.32709	6.92734	BraA01g002150.3C	protein_coding	chrA01:1055853-1056914:+	gi|685256477|ref|XP_009142898.1|	833	1e-111	PREDICTED: uncharacterized protein LOC103866654 [Brassica rapa]	gi|685256476|ref|XM_009144650.1|	519	0	PREDICTED: Brassica rapa uncharacterized LOC103866654 (LOC103866654), mRNA	.	.
BraA01g002160.3C	64.4056	57.1478	67.1056	55.8369	51.5535	52.2448	45.202	39.9914	38.0612	27.7649	27.4815	26.0647	18.6309	20.2429	19.0955	20.743	19.1998	18.5607	46.2587	49.6657	51.9505	53.8186	64.7545	71.0596	39.8964	45.3313	46.3025	21.6434	24.363	20.6363	22.0004	23.065	22.7167	55.1056	52.3604	38.5619	BraA01g002160.3C	protein_coding	chrA01:1057529-1061002:+	gi|685256479|ref|XP_009143008.1|	1254	1e-159	PREDICTED: acidic leucine-rich nuclear phosphoprotein 32-related protein [Brassica rapa]	gi|685256478|ref|XM_009144760.1|	1606	0	PREDICTED: Brassica rapa acidic leucine-rich nuclear phosphoprotein 32-related protein (LOC103866748), mRNA	Q9SCQ7	210
BraA01g002170.3C	0	0.294769	0.102505	0.185338	0.114176	0.660764	0.39121	0.320525	0.226889	0.310597	0	0.20393	0	0.323174	0.395271	0.282542	0.136785	0.131165	0.712944	0.712356	0.528117	0.214204	0.439023	0.915156	0	0.216476	0.207718	0.0989523	0.0930915	0.296448	0.107104	0	0.295152	0	0.217798	0.211196	BraA01g002170.3C	protein_coding	chrA01:1072060-1073284:+	gi|685256482|ref|XP_009143191.1|	1575	0	PREDICTED: random slug protein 5-like [Brassica rapa]	gi|685256481|ref|XM_009144943.1|	873	0	PREDICTED: Brassica rapa random slug protein 5-like (LOC103866906), mRNA	Q55CU8	127
BraA01g002180.3C	0	0.127645	0	0	0	0	0	0	0	0	0	0	0	0	0	0	0	0	0	0	0	0	0	0	0	0	0	0	0	0	0.13914	0.137953	0.127811	0	0	0	BraA01g002180.3C	protein_coding	chrA01:1077459-1078438:+	gi|685256484|ref|XP_009143303.1|	943	1e-126	PREDICTED: GATA transcription factor 19-like [Brassica rapa]	gi|923520112|ref|XM_013809931.1|	672	0	PREDICTED: Brassica napus GATA transcription factor 19-like (LOC106369822), mRNA	Q6QPM2	244
BraA01g002190.3C	34.7719	21.4444	32.7553	49.8372	47.63	54.7639	132.035	105.473	106.35	77.2265	67.4273	64.1325	57.8924	62.5965	65.793	7.80568	6.1722	10.8709	35.078	33.0811	33.0708	50.6952	46.1901	44.3499	55.2337	64.0909	65.1325	34.8093	40.7202	38.7653	79.3977	78.2315	81.178	28.1221	24.3689	30.4373	BraA01g002190.3C	protein_coding	chrA01:1080982-1083531:+	gi|685256486|ref|XP_009143412.1|	1663	0	PREDICTED: monoacylglycerol lipase ABHD6-like [Brassica rapa]	gi|923520115|ref|XM_013809937.1|	948	0	PREDICTED: Brassica napus monoacylglycerol lipase ABHD6-like (LOC106369830), mRNA	Q1LZ86	75.1
BraA01g002200.3C	0	0	0	0	0	0	0.293407	0	0.113444	0.103532	0	0	0	0	0	0	0	0	0	0	0	0.107102	0	0	0	0.108238	0	0.0989523	0.0930915	0.0988161	0	0.106191	0	0	0	0	BraA01g002200.3C	protein_coding	chrA01:1084439-1085820:+	gi|685256490|ref|XP_009143626.1|	1536	0	PREDICTED: monoacylglycerol lipase ABHD6-like [Brassica rapa]	gi|685256489|ref|XM_009145378.1|	873	0	PREDICTED: Brassica rapa monoacylglycerol lipase ABHD6-like (LOC103867291), mRNA	Q9BV23	58.2
BraA01g002210.3C	3.06844	3.04988	3.13205	5.30345	4.54079	5.12753	7.82664	7.15091	5.66711	4.06726	5.67347	5.04421	7.71248	7.21	7.189	10.8941	13.4672	7.31575	2.37105	2.22102	2.30523	2.64917	4.25852	4.27206	4.38696	4.72459	4.48308	3.64738	4.87613	4.12162	1.50642	1.95709	1.95637	8.14605	7.07735	6.04337	BraA01g002210.3C	protein_coding	chrA01:1085920-1088516:-	gi|685256488|ref|XP_009143525.1|	2694	0	PREDICTED: ATPase family AAA domain-containing protein 3C [Brassica rapa]	gi|685256487|ref|XM_009145277.1|	1800	0	PREDICTED: Brassica rapa ATPase family AAA domain-containing protein 3C (LOC103867193), mRNA	Q6NVR9	295
BraA01g002220.3C	10.2281	9.29259	19.7617	16.18	12.8748	13.7344	29.172	33.0341	29.2984	75.3197	89.8299	82.3394	23.9087	26.6457	23.0048	4.62487	4.478	14.7905	2.22286	3.33153	4.61046	6.62292	3.59313	4.57721	6.65878	16.1423	11.3336	34.1942	41.9889	35.9444	50.6469	45.9659	48.3127	5.55412	9.50689	9.60281	BraA01g002220.3C	protein_coding	chrA01:1091999-1092238:-	gi|685256492|ref|XP_009143738.1|	419	1e-51	PREDICTED: protein RADIALIS-like 3 [Brassica rapa]	gi|685256491|ref|XM_009145490.1|	240	7e-122	PREDICTED: Brassica rapa protein RADIALIS-like 3 (LOC103867386), mRNA	Q6NNN0	139
BraA01g002230.3C	5.38752	32.5061	5.54087	3.23902	2.83065	3.37607	11.408	9.03199	8.4375	22.0068	22.2308	23.8286	4.86877	4.55332	3.13263	15.2727	15.3992	6.55698	13.4531	10.0091	9.95927	6.00699	6.28964	8.46167	8.35904	13.0212	10.2573	35.9537	37.2293	37.9926	9.70713	9.88328	9.79649	25.8313	20.8461	18.7979	BraA01g002230.3C	protein_coding	chrA01:1098893-1101288:+	gi|685256494|ref|XP_009143836.1|	3398	0	PREDICTED: U-box domain-containing protein 5-like [Brassica rapa]	gi|685256493|ref|XM_009145588.1|	2148	0	PREDICTED: Brassica rapa U-box domain-containing protein 5-like (LOC103867481), mRNA	O23225	876
BraA01g002240.3C	0.156274	0.840958	0.159514	1.36997	0.977215	1.32203	1.29366	0.581915	0.441341	0.402779	0.252828	0.476019	0.577405	0.251453	0.307551	3.07775	4.57644	2.24524	9.50956	5.22594	4.60224	17.25	20.5809	17.9795	3.35138	3.78978	2.90917	7.0063	7.53294	5.84336	6.50013	7.10568	6.88951	6.53426	3.64346	4.51897	BraA01g002240.3C	protein_coding	chrA01:1103618-1105091:+	gi|685256496|ref|XP_009143937.1|	1846	0	PREDICTED: pheophytinase, chloroplastic [Brassica rapa]	gi|685256495|ref|XM_009145689.1|	1122	0	PREDICTED: Brassica rapa pheophytinase, chloroplastic (LOC103867579), mRNA	Q9FFZ1	104
BraA01g002250.3C	5.45748	5.88738	6.35622	3.91695	3.84491	3.5076	6.47346	5.33483	4.42623	5.43408	6.08752	5.54127	3.20071	2.45179	2.63922	6.98836	6.73466	3.74685	8.20784	6.09762	5.78914	5.22347	6.5764	7.06689	6.10203	6.28437	6.2231	7.79054	8.97222	7.82572	3.63162	4.56246	4.08996	7.35822	6.06984	5.17463	BraA01g002250.3C	protein_coding	chrA01:1112306-1116503:+	gi|685256498|ref|XP_009144043.1|	2553	0	PREDICTED: trichohyalin [Brassica rapa]	gi|685256497|ref|XM_009145795.1|	3759	0	PREDICTED: Brassica rapa trichohyalin (LOC103867667), mRNA	Q9FWS1	228
BraA01g002260.3C	37.3011	184.341	37.1044	14.9084	9.18424	12.7295	112.685	56.1153	50.4578	66.1344	61.2447	80.5723	21.3191	24.9763	24.0802	24.0643	25.5654	12.1024	49.6378	34.9104	49.9779	33.1938	30.1212	25.7109	22.4189	34.3141	32.9259	107.455	107.257	109.879	27.6198	36.1773	33.7505	71.1199	41.4799	35.4757	BraA01g002260.3C	protein_coding	chrA01:1116860-1117228:+	gi|685256500|ref|XP_009144127.1|	627	5e-82	PREDICTED: uncharacterized protein LOC103867758 [Brassica rapa]	gi|685256499|ref|XM_009145879.1|	369	0	PREDICTED: Brassica rapa uncharacterized LOC103867758 (LOC103867758), mRNA	.	.
BraA01g002270.3C	200.12	306.055	179.213	74.6438	66.4506	75.3747	353.366	172.865	121.485	188.962	134.398	191.799	102.669	127.648	116.404	63.1448	66.8714	72.0633	334.792	386.162	387.77	233.875	181.924	196.537	326.641	389.81	377.667	562.311	543.743	551.415	344.835	339.669	324.547	451.217	324.502	344.902	BraA01g002270.3C	protein_coding	chrA01:1118529-1118903:+	gi|685256502|ref|XP_009144195.1|	573	1e-73	PREDICTED: uncharacterized protein LOC103867852 [Brassica rapa]	gi|685256501|ref|XM_009145947.1|	375	0	PREDICTED: Brassica rapa uncharacterized LOC103867852 (LOC103867852), mRNA	.	.
BraA01g002280.3C	1.81168	5.85724	2.09044	2.83477	1.88068	2.59141	8.8987	6.70424	7.91939	4.62881	4.16292	4.23883	3.7419	3.97129	5.11562	18.8374	13.9476	6.1729	6.55074	4.70945	2.81681	6.80459	7.92016	10.1392	4.8988	3.39593	3.82879	9.23617	10.3685	11.4712	6.88873	6.08034	7.94842	6.51225	6.5771	7.95143	BraA01g002280.3C	protein_coding	chrA01:1119461-1120896:-	gi|685256504|ref|XP_009144304.1|	1974	0	PREDICTED: salicylate carboxymethyltransferase [Brassica rapa]	gi|685256503|ref|XM_009146056.1|	1113	0	PREDICTED: Brassica rapa salicylate carboxymethyltransferase (LOC103867926), mRNA	Q9SPV4	289
BraA01g002290.3C	6.50079	6.12274	7.87585	7.40042	8.28906	8.16643	11.183	6.98091	8.16728	5.51196	4.71806	4.25646	7.76058	5.99585	7.65232	20.2558	17.2127	15.0772	1.66368	1.16977	1.21412	1.16632	1.92563	2.00702	0.716611	0.45838	0.628337	2.81366	1.80222	1.85326	1.55512	1.09215	1.42851	2.54035	1.84472	1.7888	BraA01g002290.3C	protein_coding	chrA01:1124025-1126574:+	gi|685256506|ref|XP_009144397.1|	2315	0	PREDICTED: long chain base biosynthesis protein 1 [Brassica rapa]	gi|685256505|ref|XM_009146149.1|	1440	0	PREDICTED: Brassica rapa long chain base biosynthesis protein 1 (LOC103868026), mRNA	Q94IB8	816
BraA01g002300.3C	1.08884	0.61859	0.645339	2.26883	2.39606	1.4857	5.5758	1.49475	1.86488	2.06405	2.99281	3.03138	1.66857	1.65782	1.9355	0.592931	1.00468	1.51392	1.2468	1.31695	0.997455	1.46094	1.22842	1.28034	1.12988	1.40072	1.88894	1.41899	1.88846	1.62441	2.17272	2.00562	1.96141	17.9241	6.20843	7.79305	BraA01g002300.3C	protein_coding	chrA01:1127273-1132597:+	gi|674958184|emb|CDX75576.1|	4099	0	BnaA01g01260D [Brassica napus]	gi|685256507|ref|XM_009146257.1|	1566	0	PREDICTED: Brassica rapa phosphatidylinositol/phosphatidylcholine transfer protein SFH12 (LOC103868119), mRNA	Q94A34	961
BraA01g002310.3C	12.7117	6.01593	12.6932	11.5389	12.9602	15.0007	8.74673	8.67311	8.6628	14.601	11.3261	13.1173	14.0757	13.7101	14.48	19.7289	18.8201	17.5055	12.612	14.5618	13.5153	13.9255	12.3829	12.198	11.1119	12.7329	12.3607	15.9292	17.8676	19.0344	14.1469	12.0538	10.6262	8.99426	11.0876	10.3883	BraA01g002310.3C	protein_coding	chrA01:1133194-1135805:+	gi|685256512|ref|XP_009144678.1|	2056	0	PREDICTED: uncharacterized protein LOC103868293 [Brassica rapa]	gi|685256513|ref|XM_009146493.1|	882	0	PREDICTED: Brassica rapa uncharacterized LOC103868293 (LOC103868293), transcript variant X2, mRNA	.	.
BraA01g002320.3C	41.2273	47.7506	36.3573	84.3504	77.302	73.0654	83.8483	57.7851	54.3536	87.6447	95.4068	101.104	76.2419	75.467	72.8098	30.175	30.959	84.8202	62.7689	39.5846	33.8411	81.8519	53.9843	63.6634	79.4464	83.8866	81.6123	71.0667	66.0367	68.5484	105.045	103.109	107.868	186.54	133.054	138.539	BraA01g002320.3C	protein_coding	chrA01:1137223-1138453:+	gi|426262495|emb|CCJ34843.1|	1255	5e-171	horseradish peroxidase isoenzyme HRP_08562.1 [Armoracia rusticana]	gi|685258242|ref|XM_009131627.1|	474	0	PREDICTED: Brassica rapa peroxidase 49-like (LOC103854666), mRNA	O23237	479
BraA01g002330.3C	120.861	158.495	126.313	72.4106	76.2952	76.1329	54.8128	52.7778	56.0394	6.32313	8.36622	5.49479	25.5178	23.0271	26.9809	16.7485	14.7424	38.8759	57.8126	78.6041	88.794	53.676	67.2294	73.5641	50.6783	41.8019	40.1108	6.39891	6.35436	8.16514	37.5162	39.1037	30.7505	21.9422	24.8431	23.3313	BraA01g002330.3C	protein_coding	chrA01:1140316-1141244:-	gi|685256516|ref|XP_009144816.1|	786	9e-105	PREDICTED: probable ubiquitin-conjugating enzyme E2 17 [Brassica rapa]	gi|685256515|ref|XM_009146568.1|	486	0	PREDICTED: Brassica rapa probable ubiquitin-conjugating enzyme E2 17 (LOC103868454), mRNA	O23239	294
BraA01g002340.3C	19.3902	19.0168	19.7922	18.4018	20.0083	19.7811	16.6915	17.452	17.7	11.8427	10.6055	12.5499	18.4323	16.9554	17.1812	19.9732	18.9634	16.9841	14.4929	18.2524	19.3794	15.3873	17.8275	16.5397	16.8502	16.7391	15.8718	12.7224	10.7336	11.6198	14.2115	14.5276	11.9741	10.3485	12.9051	11.3059	BraA01g002340.3C	protein_coding	chrA01:1143493-1146690:+	gi|685256518|ref|XP_009144913.1|	3192	0	PREDICTED: CDK5RAP1-like protein [Brassica rapa]	gi|685256517|ref|XM_009146665.1|	1908	0	PREDICTED: Brassica rapa CDK5RAP1-like protein (LOC103868546), mRNA	Q8H0V1	1056
BraA01g002350.3C	4.61752	4.33221	3.6802	7.12108	6.04097	6.30239	6.83791	7.73908	6.93115	7.23852	7.23169	6.61515	15.2246	11.5349	13.1331	4.00421	4.04937	3.46992	2.18116	2.30756	2.39504	1.95635	2.28135	3.24241	2.3739	3.47697	2.28962	1.49585	1.05544	1.0581	1.34923	1.87281	2.10695	5.0492	4.66428	3.65821	BraA01g002350.3C	protein_coding	chrA01:1149882-1153793:+	gi|685256520|ref|XP_009144986.1|	2456	0	PREDICTED: 3-epi-6-deoxocathasterone 23-monooxygenase [Brassica rapa]	gi|685256519|ref|XM_009146738.1|	1386	0	PREDICTED: Brassica rapa 3-epi-6-deoxocathasterone 23-monooxygenase (LOC103868633), mRNA	Q9M066	850
BraA01g002360.3C	10.7072	12.2111	10.6159	65.041	63.5817	59.2328	42.2424	38.2741	37.9429	55.0528	55.1679	57.9241	74.551	71.9501	75.5977	71.4267	77.6581	83.3752	28.981	25.9163	27.4727	54.769	56.4614	58.7312	63.4022	83.6129	78.5023	29.3999	29.8081	27.5811	50.6605	53.3293	54.754	183.053	143.251	103.446	BraA01g002360.3C	protein_coding	chrA01:1164127-1168172:+	gi|685256522|ref|XP_009145073.1|	4414	0	PREDICTED: beta-galactosidase 3 [Brassica rapa]	gi|685256521|ref|XM_009146825.1|	2523	0	PREDICTED: Brassica rapa beta-galactosidase 3 (LOC103868724), mRNA	Q9SCV9	1631
BraA01g002370.3C	2.98196	4.39886	2.62233	5.2494	4.95511	4.5494	4.22216	4.92964	4.53466	6.99988	6.4325	6.84735	5.49681	5.0442	5.62028	13.0364	12.5287	9.3775	9.98018	8.25184	8.37168	8.73352	9.52652	8.77946	6.78853	5.36492	5.31394	6.59982	6.84683	6.81645	6.97228	6.28216	6.60687	7.36771	6.71602	7.35662	BraA01g002370.3C	protein_coding	chrA01:1170398-1177966:+	gi|674958176|emb|CDX75568.1|	5621	0	BnaA01g01340D [Brassica napus]	gi|685256527|ref|XM_009147008.1|	1550	0	PREDICTED: Brassica rapa MORC family CW-type zinc finger protein 3-like (LOC103868816), transcript variant X3, mRNA	Q5FV35	954
BraA01g002380.3C	0.343802	1.23341	0.467906	2.53804	3.12709	1.18493	1.67415	1.09733	1.55352	1.77223	2.34849	1.62904	2.05666	2.21279	2.70645	5.64254	4.68287	2.99366	1.16228	0.58066	1.08481	2.81111	3.00601	4.04687	1.22884	0.988149	0.71113	3.38766	3.29325	3.49577	2.20004	1.57537	3.03139	3.15823	2.11264	2.0486	BraA01g002380.3C	protein_coding	chrA01:1183779-1184922:+	gi|685256534|ref|XP_009145510.1|	995	1e-132	PREDICTED: protein SHI RELATED SEQUENCE 2 [Brassica rapa]	gi|923520251|ref|XM_013810384.1|	765	0	PREDICTED: Brassica napus protein SHI RELATED SEQUENCE 2-like (LOC106370360), mRNA	O65517	300
BraA01g002390.3C	4.66844	3.67788	4.08447	7.49697	7.65148	7.69357	6.02276	5.22482	4.52035	8.62582	9.54733	9.29554	27.3297	24.1938	23.3866	3.41161	3.05553	8.07728	9.03901	5.16088	6.31307	11.1217	12.3912	9.59988	10.2068	10.1288	9.46821	12.0079	13.3762	13.0056	19.6574	17.2458	16.5126	15.2681	13.0835	11.7306	BraA01g002390.3C	protein_coding	chrA01:1187517-1190142:-	gi|685256536|ref|XP_009145598.1|	2558	0	PREDICTED: aldehyde dehydrogenase family 3 member F1 [Brassica rapa]	gi|923504506|ref|XM_013790156.1|	1446	0	PREDICTED: Brassica napus aldehyde dehydrogenase family 3 member F1-like (LOC106350219), mRNA	Q70E96	890
BraA01g002400.3C	5.81987	4.36158	4.67658	2.39958	2.11178	2.56066	4.22084	4.08397	3.63695	1.2766	1.86979	1.25728	0.91504	0.796979	0.48739	0.174195	0.674651	1.13213	0.25117	1.00385	1.17215	1.18856	1.35334	0.987379	1.06222	0.800778	0	0.610066	0.918292	1.58399	0.528259	0.392815	0.363938	0.117672	0.134278	0	BraA01g002400.3C	protein_coding	chrA01:1192896-1193671:+	gi|685256538|ref|XP_009145707.1|	1077	2e-146	PREDICTED: GATA transcription factor 7 isoform X1 [Brassica rapa]	gi|685256537|ref|XM_009147459.1|	708	0	PREDICTED: Brassica rapa GATA transcription factor 7 (LOC103869353), transcript variant X1, mRNA	O65515	288
BraA01g002410.3C	0.487053	0	0.49715	0	0.830633	0.228907	0.948683	0	0	0.251066	0.26266	0.494531	0.257083	0.522464	0	0.342583	0	0	0.246984	0.740341	1.02455	0.519445	0	0.277407	0.783386	0.524954	0.251858	0.239959	0.451494	0.718887	0	1.03005	0.715744	0	0	0	BraA01g002410.3C	protein_coding	chrA01:1194222-1194977:-	gi|685256542|ref|XP_009145871.1|	198	9e-17	PREDICTED: putative glycine-rich cell wall structural protein 1 [Brassica rapa]	gi|685256541|ref|XM_009147623.1|	230	4e-116	PREDICTED: Brassica rapa putative glycine-rich cell wall structural protein 1 (LOC103869504), mRNA	.	.
BraA01g002420.3C	413.163	183.794	412.969	217.39	213.127	214.953	359.717	388.845	380.433	275.083	282.161	276.444	345.034	354.754	348.715	48.1325	50.7296	116.192	91.2467	110.724	116.397	88.834	68.3529	72.2002	151.204	175.744	169.33	133.751	129.469	133.512	151.649	155.16	143.204	42.642	41.969	40.4608	BraA01g002420.3C	protein_coding	chrA01:1201085-1203054:+	gi|10197652|gb|AAG14962.1|AF214008_1	2522	0	cytochrome p450-dependent monooxygenase [Brassica napus]	gi|937574917|ref|NM_001316183.1|	1536	0	Brassica napus cytochrome P450 84A1 (LOC106350027), mRNA	Q42600	936
BraA01g002430.3C	23.1458	11.5129	21.1179	13.2845	12.6923	12.6811	11.9215	9.95092	10.6633	13.7753	16.3175	16.2801	17.791	21.7308	20.2734	8.3675	8.57145	12.6667	23.387	25.0711	23.483	20.8697	20.586	17.921	25.0036	26.2942	28.9749	21.7025	23.6535	23.3691	23.8582	24.475	24.027	25.6817	26.8754	24.6557	BraA01g002430.3C	protein_coding	chrA01:1207093-1210844:-	gi|922418906|ref|XP_013610838.1|	2620	0	PREDICTED: transmembrane and coiled-coil domain-containing protein 4 [Brassica oleracea var. oleracea]	gi|685256545|ref|XM_009147812.1|	2034	0	PREDICTED: Brassica rapa transmembrane and coiled-coil domain-containing protein 4 (LOC103869705), mRNA	Q5TGY1	185
BraA01g002440.3C	13.9598	6.69641	11.9205	8.27046	9.75762	8.47553	7.61768	7.16593	8.22239	16.4079	13.5919	14.8359	8.88799	10.2551	10.1555	16.3523	13.3175	12.8413	10.0814	8.09146	7.19848	7.64685	7.48011	6.43501	7.80474	4.8007	5.95472	9.68757	12.6385	12.026	5.50352	6.43301	6.43903	6.91684	4.83002	5.59747	BraA01g002440.3C	protein_coding	chrA01:1211444-1213785:-	gi|923504489|ref|XP_013645157.1|	2686	0	PREDICTED: probable serine protease EDA2 isoform X1 [Brassica napus]	gi|923504488|ref|XM_013789703.1|	1069	0	PREDICTED: Brassica napus probable serine protease EDA2 (LOC106349697), transcript variant X1, mRNA	Q1PF50	754
BraA01g002450.3C	1.83014	3.7257	1.6873	5.8564	4.93346	6.04871	5.23213	6.81487	6.269	15.2161	13.34	13.5471	9.13033	7.97945	7.46494	11.4609	10.6949	8.71335	10.8074	5.32447	7.23392	9.41297	9.13001	7.26301	5.00101	4.64505	4.60977	16.5499	17.1568	17.4566	6.1705	6.55485	6.07298	4.90895	4.16127	4.53175	BraA01g002450.3C	protein_coding	chrA01:1214151-1218020:+	gi|685256550|ref|XP_009146238.1|	3777	0	PREDICTED: probable LRR receptor-like serine/threonine-protein kinase At4g36180 [Brassica rapa]	gi|685256549|ref|XM_009147990.1|	2563	0	PREDICTED: Brassica rapa probable LRR receptor-like serine/threonine-protein kinase At4g36180 (LOC103869882), mRNA	C0LGS2	1239
BraA01g002460.3C	2.1996	3.84309	2.08482	2.17473	2.76878	2.06755	3.28979	4.76393	6.21199	3.48252	3.72808	2.71194	1.16102	1.76964	2.55093	3.53634	5.13605	2.97555	3.10722	2.30859	2.97449	3.35126	4.37872	4.38481	2.77976	3.47147	2.84356	3.7929	3.56826	2.24169	2.09458	2.40898	2.30885	2.46352	3.23711	2.72596	BraA01g002460.3C	protein_coding	chrA01:1232599-1234584:+	gi|685256552|ref|XP_009146450.1|	2012	0	PREDICTED: NAC domain-containing protein 7 [Brassica rapa]	gi|923520241|ref|XM_013810363.1|	1116	0	PREDICTED: Brassica napus NAC domain-containing protein 76-like (LOC106370328), mRNA	O65508	655
BraA01g002470.3C	0.480728	0.049511	0.309912	0.163435	0.201366	0.356739	0.271052	0.430696	0.228657	0.469525	0.382052	0.565178	0.774587	0.54282	0.448145	0.213558	0.482478	0.760078	0.538875	0.410232	0.479009	0.215873	0.30418	0.115286	0.488345	0.245433	0.261671	0.373962	0.422176	0.224069	0.296831	0.481581	0.495753	0.264482	0.301806	0.425683	BraA01g002470.3C	protein_coding	chrA01:1238653-1243498:-	gi|923504479|ref|XP_013644866.1|	5765	0	PREDICTED: disease resistance-like protein CSA1 [Brassica napus]	gi|923504478|ref|XM_013789412.1|	3434	0	PREDICTED: Brassica napus disease resistance-like protein CSA1 (LOC106349418), mRNA	F4KIF3	945
BraA01g002480.3C	1.6981	1.13984	1.45114	2.24115	2.64905	2.50561	1.92301	1.36548	1.80675	3.46063	2.6621	2.7667	2.79317	2.24518	2.60358	5.33318	5.54034	5.05483	4.06523	3.82176	3.6136	4.69606	4.44555	4.56596	2.8583	3.27742	3.28777	2.8406	4.08175	3.01155	2.84296	2.94399	2.80494	3.62144	3.93979	3.46739	BraA01g002480.3C	protein_coding	chrA01:1244055-1249012:+	gi|685256556|ref|XP_009146644.1|	7504	0	PREDICTED: probable WRKY transcription factor 52 [Brassica rapa]	gi|685256555|ref|XM_009148396.1|	4263	0	PREDICTED: Brassica rapa probable WRKY transcription factor 52 (LOC103870247), mRNA	Q9FL92	1125
BraA01g002490.3C	158.979	297.628	172.985	437.506	443.218	443.745	358.668	371.65	377.156	310.701	305.822	302.447	363.052	341.437	348.736	489.827	479.497	478.809	578.458	483.08	461.046	526.705	528.657	493.291	316.5	282.259	270.023	391.458	372.142	387.588	306.378	304.361	300.557	234.388	258.289	302.307	BraA01g002490.3C	protein_coding	chrA01:1249794-1251120:-	gi|923504475|ref|XP_013644763.1|	1356	0	PREDICTED: 60S ribosomal protein L8-3-like [Brassica napus]	gi|685256557|ref|XM_009148505.1|	756	0	PREDICTED: Brassica rapa 60S ribosomal protein L8-3 (LOC103870340), mRNA	Q42064	513
BraA01g002500.3C	1.07967	0.915526	1.61635	0.564574	1.02295	0.710403	1.3319	1.0721	0.813111	2.41171	2.95008	2.95988	2.27955	1.96889	2.16024	1.92386	1.51963	1.78624	1.53301	1.34939	1.09773	1.49692	1.10134	1.18889	0.694628	1.5128	1.04217	1.7731	2.0017	1.31029	0.997968	2.05502	1.02249	1.12861	1.36593	0.870402	BraA01g002500.3C	protein_coding	chrA01:1252341-1255754:+	gi|685256561|ref|XP_009146917.1|	3677	0	PREDICTED: filament-like plant protein 5 [Brassica rapa]	gi|685256560|ref|XM_009148669.1|	2436	0	PREDICTED: Brassica rapa filament-like plant protein 5 (LOC103870499), mRNA	.	.
BraA01g002510.3C	0	0.27231	0.284086	0	0	0.523217	0	0	0	1.72159	0.600367	0.847767	0.293809	0.298551	0.273866	0	0.37909	0	0.564536	0.564069	0.585455	0	0.30418	0	0	0	0	0.548478	0.515993	0	2.67148	0.882898	1.63599	0.264482	0	0	BraA01g002510.3C	protein_coding	chrA01:1259638-1259952:-	gi|685256563|ref|XP_009147025.1|	559	4e-72	PREDICTED: auxin-induced protein 15A-like [Brassica rapa]	gi|685256562|ref|XM_009148777.1|	315	2e-163	PREDICTED: Brassica rapa auxin-induced protein 15A-like (LOC103870600), mRNA	O65695	152
BraA01g002520.3C	15.4531	17.2154	19.6778	19.7662	20.7006	18.4085	13.7087	16.6035	11.4074	13.0922	11.5516	13.9815	16.6363	18.7102	16.1094	20.2321	21.6736	21.3827	23.5864	25.7375	25.9087	27.5768	23.5779	26.3173	23.1324	15.1715	18.9883	14.1714	12.3393	11.442	24.9665	20.7088	19.4862	12.0679	11.614	19.3062	BraA01g002520.3C	protein_coding	chrA01:1265324-1266025:-	gi|685256565|ref|XP_009147136.1|	871	2e-115	PREDICTED: oral-facial-digital syndrome 1 protein [Brassica rapa]	gi|685256566|ref|XM_009148947.1|	573	0	PREDICTED: Brassica rapa oral-facial-digital syndrome 1 protein (LOC103870694), transcript variant X2, mRNA	.	.
BraA01g002530.3C	0.0628456	0.0614894	0	0.0579929	0	0	0	0.133724	0.0709942	0.0647911	0	0.319052	0.132688	0.269659	0.123682	0.795676	0.342404	0.164168	27.471	28.9131	30.6703	21.448	26.9248	25.2708	14.0841	12.057	14.624	18.2679	16.5451	17.8717	17.762	21.332	15.3923	24.4262	19.8316	25.3762	BraA01g002530.3C	protein_coding	chrA01:1267251-1269141:+	gi|685256569|ref|XP_009147305.1|	2297	0	PREDICTED: RNA demethylase ALKBH5 [Brassica rapa]	gi|685256568|ref|XM_009149057.1|	1395	0	PREDICTED: Brassica rapa RNA demethylase ALKBH5 (LOC103870848), mRNA	.	.
BraA01g002540.3C	3.32443	1.55596	3.09189	1.5723	1.62726	1.57311	2.0134	1.78054	2.17287	3.09164	3.32426	3.1448	2.24639	2.39638	2.10137	2.20517	2.25892	2.35404	1.52069	1.94917	1.83988	1.38106	1.55598	1.5096	1.64838	2.24456	2.0676	3.10411	3.01854	2.8912	1.42954	1.56149	1.48379	2.87133	3.16979	2.58796	BraA01g002540.3C	protein_coding	chrA01:1270925-1287647:+	gi|685256578|ref|XP_009147693.1|	19388	0	PREDICTED: transformation/transcription domain-associated protein [Brassica rapa]	gi|685256577|ref|XM_009149445.1|	11168	0	PREDICTED: Brassica rapa transformation/transcription domain-associated protein (LOC103871184), mRNA	Q80YV3	634
BraA01g002550.3C	13.4701	18.0937	16.7788	10.9552	11.4212	9.87164	7.33747	3.64346	4.64235	2.35374	0.738732	0.927245	2.16914	1.95924	3.14519	0.321171	0.310972	0.298196	2.31548	6.24663	6.24333	1.70443	1.24761	5.20137	1.22404	0	0.708352	0.449924	0.846551	1.12326	0.730484	1.44851	0.89468	0.867832	1.9806	0.720211	BraA01g002550.3C	protein_coding	chrA01:1287968-1288485:-	gi|685256575|ref|XP_009147595.1|	469	7e-58	PREDICTED: transcription factor bHLH11-like [Brassica rapa]	gi|685256574|ref|XM_009149347.1|	259	3e-132	PREDICTED: Brassica rapa transcription factor bHLH11-like (LOC103871090), mRNA	Q8W2F2	123
BraA01g002560.3C	5.77311	9.29759	4.90197	5.6102	4.70498	5.81073	3.33366	3.58741	4.03997	3.16027	3.19601	2.07495	1.9416	3.01422	2.41309	4.24036	3.06188	2.7359	1.86534	1.96734	1.2359	0.653847	0.725884	1.22214	0.49304	0.936107	0.475537	0.503411	0.378876	0.854621	0.708348	0.324141	0.550572	2.6217	0.277007	0.53722	BraA01g002560.3C	protein_coding	chrA01:1288837-1291281:+	gi|685256571|ref|XP_009147422.1|	2729	0	PREDICTED: DNA-(apurinic or apyrimidinic site) lyase 2 isoform X1 [Brassica rapa]	gi|685256570|ref|XM_009149174.1|	1648	0	PREDICTED: Brassica rapa DNA-(apurinic or apyrimidinic site) lyase 2 (LOC103870940), transcript variant X1, mRNA	F4JNY0	807
BraA01g002570.3C	2203.61	1508.97	2331.14	909.115	937.369	915.744	1058.73	1155.42	1141.81	316.343	294.508	309.514	453.88	467.279	460.994	165.724	170.164	301.297	660.559	805.121	841.793	627.424	467.106	522.842	796.508	543.918	550.815	228.921	221.119	233.459	528.091	503.887	487.243	373.688	321.452	417.53	BraA01g002570.3C	protein_coding	chrA01:1293383-1293862:+	gi|685256580|ref|XP_009147799.1|	737	2e-97	PREDICTED: chaperone protein dnaJ 11, chloroplastic [Brassica rapa]	gi|685256579|ref|XM_009149551.1|	480	0	PREDICTED: Brassica rapa chaperone protein dnaJ 11, chloroplastic (LOC103871280), mRNA	Q9FYB5	253
BraA01g002580.3C	38.5541	30.5991	36.7368	76.1691	69.7149	69.106	79.29	54.7636	61.2754	66.1756	66.2457	61.2177	88.7612	89.5338	95.7524	98.6638	105.866	73.3918	62.292	41.0435	40.5505	60.0369	76.2051	69.6144	138.206	121.347	121.846	85.1729	86.3066	82.1297	94.2674	94.9813	107.688	109.816	106.744	123.671	BraA01g002580.3C	protein_coding	chrA01:1296579-1297433:+	gi|685256582|ref|XP_009147904.1|	818	9e-106	PREDICTED: cold shock domain-containing protein 3-like [Brassica rapa]	gi|685256581|ref|XM_009149656.1|	855	0	PREDICTED: Brassica rapa cold shock domain-containing protein 3-like (LOC103871381), mRNA	O65639	187
BraA01g002590.3C	22.0372	25.9677	22.7874	16.2684	16.1225	16.4813	19.0359	19.6739	17.1014	13.8292	13.4344	14.2036	13.9583	11.203	14.2366	16.9831	17.0963	17.5202	9.52307	9.02973	8.76743	8.17487	8.48213	9.2772	6.88352	6.19618	6.24279	8.87456	8.61539	7.07102	6.84659	6.38292	7.32171	14.1129	9.97445	10.0751	BraA01g002590.3C	protein_coding	chrA01:1301622-1303239:-	gi|685256584|ref|XP_009148014.1|	1539	0	PREDICTED: calmodulin-lysine N-methyltransferase-like [Brassica rapa]	gi|685256583|ref|XM_009149766.1|	878	0	PREDICTED: Brassica rapa calmodulin-lysine N-methyltransferase-like (LOC103871480), mRNA	B0K012	132
BraA01g002600.3C	41.7005	80.3163	45.9166	46.9645	48.9047	52.7773	61.7177	60.4351	70.8466	42.9915	42.852	48.0084	46.7948	49.3112	60.0968	86.377	88.1064	78.4826	47.6208	41.2595	50.7668	40.2716	39.8339	48.9981	33.0959	28.3121	19.6959	51.7665	44.1348	42.6486	39.572	56.5948	55.3294	56.7893	40.5912	50.7546	BraA01g002600.3C	protein_coding	chrA01:1303482-1303957:+	gi|685256592|ref|XP_009148401.1|	458	3e-57	PREDICTED: uncharacterized protein LOC103871813 [Brassica rapa]	gi|923504417|ref|XM_013787780.1|	267	8e-137	PREDICTED: Brassica napus uncharacterized LOC106348086 (LOC106348086), mRNA	.	.
BraA01g002610.3C	9.67098	20.7759	11.0518	14.7444	15.059	16.0071	18.0182	15.7691	15.7936	19.5073	17.0068	17.9312	10.9861	11.0507	9.82668	15.9708	17.0386	18.5354	6.2901	6.49796	5.85981	10.8747	10.5697	11.9744	9.35555	8.38416	9.567	13.7761	11.9857	11.2746	6.50253	9.33713	8.7537	4.49524	2.7358	5.19519	BraA01g002610.3C	protein_coding	chrA01:1304217-1305607:-	gi|685256590|ref|XP_009148286.1|	1352	0	PREDICTED: LOW QUALITY PROTEIN: L-ascorbate peroxidase 5, peroxisomal [Brassica rapa]	gi|685256589|ref|XM_009150038.1|	816	0	PREDICTED: Brassica rapa L-ascorbate peroxidase 5, peroxisomal (LOC103871729), mRNA	Q7XZP5	466
BraA01g002620.3C	0.295184	0.722035	0.90391	0.272391	0.503414	0	0.28748	0.471074	0.333457	0	0.318376	0	0.467423	0.316645	0.145232	0	0	0.771093	0.299375	0.448691	0.931406	0.944445	0.64523	0.168125	0.633039	0.954462	1.98434	3.78118	2.59951	2.9046	0.157411	0.156068	0.289189	1.12204	0.800244	0.775984	BraA01g002620.3C	protein_coding	chrA01:1306551-1308050:+	gi|685256594|ref|XP_009148517.1|	949	2e-128	PREDICTED: rac-like GTP-binding protein ARAC6 [Brassica rapa]	gi|923504411|ref|XM_013787557.1|	594	0	PREDICTED: Brassica napus rac-like GTP-binding protein ARAC6 (LOC106347902), mRNA	Q38902	363
BraA01g002630.3C	6.34088	18.0727	6.75374	5.17286	5.11963	5.96023	16.1992	8.506	9.13548	8.43202	8.82143	8.30438	3.78348	4.83033	3.70753	6.20527	5.88304	4.92117	46.694	53.826	50.8407	30.6766	42.2839	43.8616	18.6239	31.3982	37.6362	92.905	96.2619	90.0644	17.2498	19.6292	17.646	52.6594	48.531	44.5474	BraA01g002630.3C	protein_coding	chrA01:1308486-1309816:-	gi|685256596|ref|XP_009148617.1|	1179	2e-159	PREDICTED: histone-lysine N-methyltransferase, H3 lysine-79 specific-like [Brassica rapa]	gi|685256595|ref|XM_009150369.1|	954	0	PREDICTED: Brassica rapa histone-lysine N-methyltransferase, H3 lysine-79 specific-like (LOC103871997), mRNA	.	.
BraA01g002640.3C	2.92232	4.42504	4.04822	11.2361	8.93919	9.54871	11.9941	8.14285	9.74649	16.6421	14.1837	15.3305	8.88772	10.0761	10.0646	11.2563	10.7093	9.17876	12.6315	9.02511	8.85501	10.6857	10.7223	10.7792	9.54985	6.82441	5.46893	17.9627	19.0272	14.5831	9.94385	9.56473	10.6339	4.16559	4.07438	5.26783	BraA01g002640.3C	protein_coding	chrA01:1314162-1316800:+	gi|923504408|ref|XP_013642824.1|	2093	0	PREDICTED: protein MID1-COMPLEMENTING ACTIVITY 1-like [Brassica napus]	gi|685256599|ref|XM_009150527.1|	1254	0	PREDICTED: Brassica rapa protein MID1-COMPLEMENTING ACTIVITY 1 (LOC103872098), transcript variant X2, mRNA	Q8L7E9	757
BraA01g002650.3C	1.04369	2.65503	0.532661	1.54095	1.06796	1.66775	1.32138	2.22078	2.82962	4.94958	5.17816	4.55675	1.5425	1.45544	1.6432	9.98384	8.2452	3.40796	8.57388	2.11526	1.64659	2.78274	3.76423	4.63665	2.23825	1.57486	2.15879	10.284	8.99762	9.24284	9.35019	8.60826	7.25969	7.93446	6.90382	8.56022	BraA01g002650.3C	protein_coding	chrA01:1322385-1323469:-	gi|685256602|ref|XP_009148866.1|	1056	4e-142	PREDICTED: protein FD-like [Brassica rapa]	gi|199580263|gb|AC189569.2|	653	0	Brassica rapa subsp. pekinensis clone KBrH009I12, complete sequence	Q84JK2	283
BraA01g002660.3C	13.7933	17.4415	12.5878	27.1824	27.3112	28.9522	22.8822	23.7534	21.7881	23.8613	23.1351	23.6188	26.2224	25.8933	25.7078	41.6855	41.1578	35.0392	18.4942	19.0712	18.8107	26.2424	29.9587	29.627	20.368	18.8984	20.3703	24.4758	23.3513	24.6147	27.7389	27.0079	27.4273	32.325	28.5207	31.5279	BraA01g002660.3C	protein_coding	chrA01:1333901-1336752:-	gi|685256604|ref|XP_009148977.1|	2002	0	PREDICTED: la-related protein 1C-like [Brassica rapa]	gi|685256603|ref|XM_009150729.1|	1500	0	PREDICTED: Brassica rapa la-related protein 1C-like (LOC103872339), mRNA	Q94K80	469
BraA01g002670.3C	1.32082	1.50771	1.96613	10.9187	9.88625	11.1738	5.30619	2.92758	4.10322	7.20573	7.24171	8.60539	10.9224	8.97339	9.42286	18.8904	18.2905	16.5328	7.42348	3.01156	4.97802	11.7976	12.6312	11.9739	9.2649	6.82144	6.71623	5.96509	7.5504	6.55257	12.15	10.9406	13.0478	14.1729	10.1455	13.7731	BraA01g002670.3C	protein_coding	chrA01:1338004-1340428:-	gi|685256606|ref|XP_009149096.1|	2482	0	PREDICTED: aspartic proteinase-like protein 1 [Brassica rapa]	gi|685256605|ref|XM_009150848.1|	1593	0	PREDICTED: Brassica rapa aspartic proteinase-like protein 1 (LOC103872417), mRNA	Q8VYV9	452
BraA01g002680.3C	236.129	199.878	238.21	223.62	231.167	215.346	190.497	175.106	173.159	104.311	106.6	102.732	130.385	137.812	135.099	156.101	159.03	143.134	179.227	254.649	224.579	210.669	224.778	211.195	151.652	142.332	140.851	86.657	81.3966	93.4553	172.302	173.019	167.592	111.999	117.341	130.163	BraA01g002680.3C	protein_coding	chrA01:1341997-1343409:+	gi|685256608|ref|XP_009149208.1|	1034	6e-141	PREDICTED: ras-related protein RABB1b-like [Brassica rapa]	gi|685256607|ref|XM_009150960.1|	636	0	PREDICTED: Brassica rapa ras-related protein RABB1b-like (LOC103872509), mRNA	Q38922	394
BraA01g002690.3C	24.1949	35.9433	21.4962	38.1573	38.3369	36.1989	32.0901	31.2797	33.2128	29.335	31.9021	30.6329	34.9091	33.7592	35.5666	52.8437	57.6922	53.0041	42.4773	36.9271	34.3451	43.4062	38.1456	33.2214	32.9847	28.3093	28.6323	32.7005	33.9443	28.8137	34.1957	28.9623	31.0639	23.6669	26.1087	26.6235	BraA01g002690.3C	protein_coding	chrA01:1343834-1346708:-	gi|685256610|ref|XP_009149310.1|	2366	0	PREDICTED: pentatricopeptide repeat-containing protein At4g35850, mitochondrial [Brassica rapa]	gi|685256609|ref|XM_009151062.1|	1311	0	PREDICTED: Brassica rapa pentatricopeptide repeat-containing protein At4g35850, mitochondrial (LOC103872601), mRNA	Q8VYR5	821
BraA01g002700.3C	11.9103	16.2185	11.6559	8.04469	9.21375	11.8878	24.036	11.8877	14.5642	8.86114	11.5217	9.59971	12.7029	16.2008	15.2238	20.9004	21.5747	27.7448	26.5249	23.1434	27.2495	19.6429	17.5798	17.9032	19.0909	17.7337	20.191	21.5358	24.927	27.7889	33.1316	30.3821	31.1559	29.9876	32.3554	34.3442	BraA01g002700.3C	protein_coding	chrA01:1348424-1349524:-	gi|685256612|ref|XP_009149384.1|	1237	9e-171	PREDICTED: NEP1-interacting protein 1 [Brassica rapa]	gi|685256611|ref|XM_009151136.1|	714	0	PREDICTED: Brassica rapa NEP1-interacting protein 1 (LOC103872677), mRNA	Q8GT75	447
BraA01g002710.3C	106.133	84.2511	104.352	102.647	100.822	100.067	72.4334	80.5112	77.298	131.37	128.987	130.338	103.188	105.934	104.021	86.9299	87.3129	99.5624	111.234	122.177	113.714	93.2921	89.8481	89.3872	93.0652	92.9502	96.2161	99.2935	102.181	99.5087	89.411	89.5764	92.577	83.4354	86.2565	86.4103	BraA01g002710.3C	protein_coding	chrA01:1352982-1357460:+	gi|923504395|ref|XP_013642213.1|	4743	0	PREDICTED: aconitate hydratase 1 [Brassica napus]	gi|685256629|ref|XM_009151757.1|	2694	0	PREDICTED: Brassica rapa aconitate hydratase 1 (LOC103873312), mRNA	Q42560	1796
BraA01g002720.3C	0	0.102482	0	0.0966548	0	0	0.204018	0	0	0	0	0.106351	0	0	0.103068	0.442042	0	0	0	0	0	0	0	0.119315	0	0	0	0.103208	0.0970954	0	0	0	0.102616	0	0.113583	0.11014	BraA01g002720.3C	protein_coding	chrA01:1357943-1359716:-	gi|685256626|ref|XP_009149860.1|	1388	0	PREDICTED: probable prolyl 4-hydroxylase 11 isoform X1 [Brassica rapa]	gi|685256625|ref|XM_009151612.1|	837	0	PREDICTED: Brassica rapa probable prolyl 4-hydroxylase 11 (LOC103873157), transcript variant X1, mRNA	Q9SZT0	303
BraA01g002730.3C	0.156693	0	0	0	0	0	0	0	0	0	0	0	0	0	0	0	0	0	0	0	0	0	0	0	0	0	0	0	0	0	0	0	0	0	0	0	BraA01g002730.3C	protein_coding	chrA01:1360722-1363534:-	gi|685256621|ref|XP_009149700.1|	1230	6e-167	PREDICTED: probable prolyl 4-hydroxylase 11 isoform X1 [Brassica rapa]	gi|685256620|ref|XM_009151452.1|	783	0	PREDICTED: Brassica rapa probable prolyl 4-hydroxylase 11 (LOC103872989), transcript variant X1, mRNA	Q9SZT0	293
BraA01g002740.3C	0	0	0	0	0	0	0.0892179	0	0.413947	0.18889	0	0.279046	0.0967082	0	0.0901441	0.257742	0.374336	0	0	0	0	0.0977012	0	0	0.19646	0.0987375	0	0.180534	0.0849204	0	0	0.0968697	0	0.0870552	0.298022	0	BraA01g002740.3C	protein_coding	chrA01:1365504-1367108:-	gi|685256615|ref|XP_009149485.1|	1388	0	PREDICTED: prolyl 4-hydroxylase 5-like isoform X1 [Brassica rapa]	gi|685256616|ref|XM_009151307.1|	488	0	PREDICTED: Brassica rapa prolyl 4-hydroxylase 5-like (LOC103872771), transcript variant X2, mRNA	F4JNU8	426
BraA01g002750.3C	1.2053	0.631023	1.41375	0.819538	0.80539	0.894429	0.566327	0.629917	0.513578	1.83122	2.04123	2.12555	1.13846	1.19086	1.33168	1.17499	1.22409	1.31189	0.99723	1.07141	1.07866	0.969731	0.866649	0.963496	1.49648	1.68654	1.64018	0.906358	1.0683	1.13399	1.21782	1.14036	1.19118	2.59219	2.08666	1.84552	BraA01g002750.3C	protein_coding	chrA01:1371272-1382615:+	gi|685256632|ref|XP_009150077.1|	8142	0	PREDICTED: DNA-directed RNA polymerase II subunit 1-like [Brassica rapa]	gi|685256631|ref|XM_009151829.1|	5181	0	PREDICTED: Brassica rapa DNA-directed RNA polymerase II subunit 1-like (LOC103873389), mRNA	P18616	2982
BraA01g002760.3C	12.3696	28.5926	18.3078	26.6813	28.1273	29.9396	28.3099	28.4589	24.8029	16.7377	22.6805	19.7812	23.5047	20.5668	20.3878	41.1099	42.3317	43.2179	39.9879	39.3282	35.7778	38.2575	40.0504	42.7999	25.3668	27.4976	20.4685	25.748	25.513	25.4083	29.6831	27.3045	25.4487	23.6564	30.516	35.7692	BraA01g002760.3C	protein_coding	chrA01:1383130-1384835:+	gi|685256636|ref|XP_009150254.1|	470	1e-55	PREDICTED: serine/arginine-rich splicing factor SR45a-like [Brassica rapa]	gi|685256635|ref|XM_009152006.1|	541	0	PREDICTED: Brassica rapa serine/arginine-rich splicing factor SR45a-like (LOC103873570), mRNA	Q84TH4	114
BraA01g002770.3C	453.997	1780.4	452.651	641.012	646.351	631.334	201.867	180.259	165.422	5.26826	4.13367	4.21567	51.9223	45.5657	48.0838	8.0872	14.1382	35.4576	347.074	904.915	838.616	456.601	423.758	418.02	245.204	285.196	271.016	6.60871	6.66138	6.75675	135.399	139.985	119.682	56.907	64.4183	47.5208	BraA01g002770.3C	protein_coding	chrA01:1388601-1389464:-	gi|685256640|ref|XP_009150416.1|	964	3e-131	PREDICTED: senescence-associated protein DIN1 isoform X1 [Brassica rapa]	gi|685256639|ref|XM_009152168.1|	549	0	PREDICTED: Brassica rapa senescence-associated protein DIN1 (LOC103873743), transcript variant X1, mRNA	.	.
BraA01g002780.3C	27.2696	50.6543	25.2591	35.1544	33.9657	31.8303	15.3005	12.1246	12.7819	3.52471	3.07291	4.79378	5.92937	6.81095	8.65082	8.58842	8.53744	9.2499	10.1546	18.7251	18.9213	12.7618	13.3449	14.0944	7.68111	6.75568	7.66099	3.28858	2.79197	3.36415	7.46626	5.50889	5.66215	7.03935	6.0025	7.27566	BraA01g002780.3C	protein_coding	chrA01:1389832-1391609:+	gi|685256644|ref|XP_009150586.1|	1630	0	PREDICTED: thiol-disulfide oxidoreductase LTO1 [Brassica rapa]	gi|685256643|ref|XM_009152338.1|	1077	0	PREDICTED: Brassica rapa thiol-disulfide oxidoreductase LTO1 (LOC103873899), mRNA	Q8L540	543
BraA01g002790.3C	441.753	266.633	457.427	341.927	341.608	345.228	172.974	174.471	159.773	69.9084	64.8746	67.4098	129.839	132.087	130.379	71.643	66.4695	121.919	359.83	574.878	575.785	506.988	527.302	540.539	310.008	266.656	255.135	71.0093	72.3267	73.5638	252.818	258.162	255.722	174.982	192.753	206.004	BraA01g002790.3C	protein_coding	chrA01:1393373-1394149:+	gi|923504377|ref|XP_013641458.1|	1091	1e-149	PREDICTED: ganglioside-induced differentiation-associated protein 2-like [Brassica napus]	gi|685256647|ref|XM_009152544.1|	609	0	PREDICTED: Brassica rapa ganglioside-induced differentiation-associated protein 2-like (LOC103874094), mRNA	.	.
BraA01g002800.3C	5.18476	11.134	5.70463	34.7957	32.9957	32.469	16.8533	14.1843	16.2779	20.548	23.6031	22.083	19.5478	17.3352	21.7989	42.5308	44.115	27.7913	24.9261	16.8538	14.9433	32.2439	46.9517	42.7999	21.0828	16.4018	16.9221	18.6438	21.3471	20.2084	23.9141	24.7781	24.3419	23.0355	21.7592	23.507	BraA01g002800.3C	protein_coding	chrA01:1395754-1397621:-	gi|685256650|ref|XP_009150864.1|	1903	0	PREDICTED: uncharacterized protein LOC103874176 [Brassica rapa]	gi|685256649|ref|XM_009152616.1|	1302	0	PREDICTED: Brassica rapa uncharacterized LOC103874176 (LOC103874176), mRNA	Q54I39	121
BraA01g002810.3C	0	0	0	0	0	0	0	0	0	0	0	0	0	0	0	0	0	0	0	0	0	0	0.129833	0	0	0	0	0	0	0	0	0	0	0	0	0	BraA01g002810.3C	protein_coding	chrA01:1399098-1399932:-	gi|674958128|emb|CDX75520.1|	1184	2e-162	BnaA01g01820D [Brassica napus]	gi|923520218|ref|XM_013810303.1|	490	0	PREDICTED: Brassica napus uncharacterized LOC106370260 (LOC106370260), mRNA	.	.
BraA01g002820.3C	0	0	0	0	0.262651	0	0	0	0	0	0	0	0	0	0	0	0	0	0	0	0	0	0	0	0	0	0	0	0	0	0	0	0	0	0	0	BraA01g002820.3C	protein_coding	chrA01:1401644-1402402:-	gi|685256652|ref|XP_009151053.1|	932	4e-124	PREDICTED: uncharacterized protein LOC103874360 [Brassica rapa]	gi|685256651|ref|XM_009152805.1|	759	0	PREDICTED: Brassica rapa uncharacterized LOC103874360 (LOC103874360), mRNA	O65499	54.7
BraA01g002830.3C	0.103997	0	0	0.383868	0.472958	0.48877	0.810263	0	0.352444	0	0.112168	0.211187	0	0	0	0	0	0	1.05474	3.8993	2.62517	2.32918	0.340985	0.473862	2.00725	1.00881	0.860442	0.102474	0.0964043	0.409331	2.32923	1.86948	1.63016	0.88945	0.563873	0.328067	BraA01g002830.3C	protein_coding	chrA01:1403232-1404074:-	gi|685256654|ref|XP_009151156.1|	1203	3e-164	PREDICTED: uncharacterized protein LOC103874453 [Brassica rapa]	gi|685256653|ref|XM_009152908.1|	843	0	PREDICTED: Brassica rapa uncharacterized LOC103874453 (LOC103874453), mRNA	.	.
BraA01g002840.3C	0	0.0959483	0	0.271477	0.111494	0.0921775	0	0	0	0	0.105769	0	0.103523	0	0	0.275905	0	0	0	0	0.309427	0	0.107178	0	0	0	0	0.0966279	0.0909048	0	0.104588	0.103696	0.096073	0	0	0	BraA01g002840.3C	protein_coding	chrA01:1405975-1406868:-	gi|685256656|ref|XP_009151254.1|	1374	0	PREDICTED: uncharacterized protein LOC103874551 [Brassica rapa]	gi|685256655|ref|XM_009153006.1|	894	0	PREDICTED: Brassica rapa uncharacterized LOC103874551 (LOC103874551), mRNA	.	.
BraA01g002850.3C	0	0	0	0	0	0	0	0	0	0	0	0	0	0	0	0	0	0.141893	0	0	0	0	0	0	0	0	0	0	0	0	0	0	0	0	0	0	BraA01g002850.3C	protein_coding	chrA01:1411996-1412802:+	gi|922414817|ref|XP_013592252.1|	746	1e-95	PREDICTED: zinc finger protein ZAT9 [Brassica oleracea var. oleracea]	gi|685256657|ref|XM_009153108.1|	807	0	PREDICTED: Brassica rapa uncharacterized LOC103874642 (LOC103874642), mRNA	O65499	57
BraA01g002860.3C	27.5636	15.1082	32.4068	24.7694	23.7089	22.1108	36.1905	29.6323	29.9148	73.1252	73.2336	78.5388	64.3659	63.7019	65.6062	22.6358	22.2118	22.4302	31.4676	32.904	33.848	46.1729	44.8722	40.4397	47.274	58.7949	62.4609	57.7324	56.721	56.446	62.0268	67.678	64.682	119.722	118.777	99.2432	BraA01g002860.3C	protein_coding	chrA01:1413421-1415635:-	gi|685256660|ref|XP_009151452.1|	1838	0	PREDICTED: probable serine/threonine-protein kinase Cx32, chloroplastic [Brassica rapa]	gi|685256659|ref|XM_009153204.1|	1212	0	PREDICTED: Brassica rapa probable serine/threonine-protein kinase Cx32, chloroplastic (LOC103874733), mRNA	P27450	605
BraA01g002870.3C	1.05395	2.4374	0.880201	2.65246	2.72339	3.15217	4.85228	5.70849	6.60246	6.02558	4.03033	5.15609	4.04589	5.03621	3.95984	10.6481	10.1795	5.63151	4.47001	2.81572	2.62015	5.00711	4.81701	3.71088	2.15752	2.27193	2.18002	1.98261	2.66455	3.29981	6.33565	7.4974	8.07265	7.19304	6.96133	5.54129	BraA01g002870.3C	protein_coding	chrA01:1418398-1420457:-	gi|685256662|ref|XP_009151519.1|	1400	0	PREDICTED: protein RKD5 [Brassica rapa]	gi|685256661|ref|XM_009153271.1|	449	0	PREDICTED: Brassica rapa protein RKD5 (LOC103874820), mRNA	O81791	382
BraA01g002880.3C	37.3674	28.5926	32.763	12.8202	9.80419	9.90682	50.8556	61.1624	61.1539	36.5486	47.5372	50.5881	79.9064	81.71	91.9249	40.436	52.2025	54.4379	23.8077	31.5555	53.9146	40.3634	23.0379	24.5573	54.9654	75.3869	87.2008	57.5902	62.617	67.8818	101.677	98.7833	94.3374	140.674	142.344	150.622	BraA01g002880.3C	protein_coding	chrA01:1421308-1421490:+	gi|685256664|ref|XP_009151594.1|	163	1e-13	PREDICTED: uncharacterized protein LOC103874892 [Brassica rapa]	gi|685256663|ref|XM_009153346.1|	183	3e-90	PREDICTED: Brassica rapa uncharacterized LOC103874892 (LOC103874892), mRNA	.	.
BraA01g002890.3C	135.003	227.734	131.29	193.704	202.628	180.676	166.153	187.859	206.908	124.118	128.297	126.419	164.678	167.556	179.421	260.556	272.184	252.938	173.654	161.415	153.249	179.318	194.782	197.154	133.065	123.993	117.061	139.312	130.87	133.45	135.644	136.663	136.697	196.154	200.18	208.178	BraA01g002890.3C	protein_coding	chrA01:1424614-1425521:+	gi|923504520|ref|XP_013645990.1|	350	2e-39	PREDICTED: high mobility group B protein 4-like [Brassica napus]	gi|685256667|ref|XM_009153557.1|	426	0	PREDICTED: Brassica rapa high mobility group B protein 4-like (LOC103875070), mRNA	Q42344	104
BraA01g002900.3C	5.30305	3.64307	7.14054	10.8283	11.5455	10.3936	9.99964	8.88311	9.30462	13.3772	13.0215	15.0078	11.6729	13.1927	15.7658	44.6019	40.1118	17.6845	5.14948	3.31581	3.5602	4.57272	6.16581	5.0126	6.04931	4.13477	4.55096	8.116	7.6353	6.55048	9.38629	8.23243	8.84317	7.82724	5.13886	6.76275	BraA01g002900.3C	protein_coding	chrA01:1428532-1429870:+	gi|685256672|ref|XP_009152034.1|	1047	3e-141	PREDICTED: WUSCHEL-related homeobox 13-like [Brassica rapa]	gi|685256671|ref|XM_009153786.1|	774	0	PREDICTED: Brassica rapa WUSCHEL-related homeobox 13-like (LOC103875250), mRNA	O81788	338
BraA01g002910.3C	9.36641	8.85881	8.47705	7.0874	6.60247	6.04551	8.20976	7.37412	6.41906	5.15006	8.4186	6.40354	6.52595	5.89447	6.51311	4.83129	5.01808	4.81192	1.5199	2.84747	2.56137	1.39851	2.18386	1.84938	1.74086	3.09588	3.29353	2.15348	2.1417	1.65897	1.06555	1.45263	1.65172	10.147	4.13049	2.88905	BraA01g002910.3C	protein_coding	chrA01:1430089-1431492:-	gi|685256670|ref|XP_009151919.1|	2436	0	PREDICTED: transcription factor IIIB 90 kDa subunit [Brassica rapa]	gi|685256669|ref|XM_009153671.1|	1404	0	PREDICTED: Brassica rapa transcription factor IIIB 90 kDa subunit (LOC103875157), mRNA	O81787	606
BraA01g002920.3C	1.94821	2.0528	1.22375	4.28701	2.89657	3.94425	4.52449	4.46433	4.90952	3.55354	4.20257	4.26057	3.3223	5.46578	3.83413	11.1735	7.96088	8.80826	1.36791	1.67051	3.46769	3.51624	3.60336	2.56068	4.17806	2.58439	3.40978	4.57768	2.36166	2.65435	2.39748	2.85244	2.49593	4.2724	3.08771	2.67894	BraA01g002920.3C	protein_coding	chrA01:1432134-1433448:+	gi|685256674|ref|XP_009152141.1|	1007	3e-137	PREDICTED: uncharacterized protein LOC103875346 [Brassica rapa]	gi|685256673|ref|XM_009153893.1|	585	0	PREDICTED: Brassica rapa uncharacterized LOC103875346 (LOC103875346), mRNA	.	.
BraA01g002930.3C	1.7123	1.89873	2.21387	2.63347	1.81701	1.073	3.11287	5.4652	3.99758	2.11837	1.72371	1.50677	1.80761	3.18377	2.92053	5.29932	4.97555	3.57835	0.115774	0.578391	0.240128	0.608724	0.249523	0.650172	1.34644	0.369108	0.590293	0.787366	0.846551	0.786283	0.852231	0.482835	0.44734	1.30175	1.36166	0.600175	BraA01g002930.3C	protein_coding	chrA01:1434780-1435547:+	gi|685256676|ref|XP_009101231.1|	666	9e-84	PREDICTED: uncharacterized protein LOC103875432 [Brassica rapa]	gi|685256675|ref|XM_009102983.1|	768	0	PREDICTED: Brassica rapa uncharacterized LOC103875432 (LOC103875432), mRNA	.	.
BraA01g002940.3C	4.15619	4.82897	3.24805	7.79038	7.75258	8.11859	6.13482	6.56363	6.45574	6.29338	7.14436	7.12124	6.58132	7.73247	8.62679	10.5059	9.99533	11.4507	6.91556	5.98854	8.60619	10.1811	11.64	12.2799	7.45087	7.13938	7.52217	8.70252	7.4647	7.47643	7.48015	7.27901	7.82547	12.6511	13.1688	12.0184	BraA01g002940.3C	protein_coding	chrA01:1439991-1441838:-	gi|685256678|ref|XP_009101343.1|	2020	0	PREDICTED: probable serine/threonine-protein kinase sky1 [Brassica rapa]	gi|685256679|ref|XM_009103165.1|	792	0	PREDICTED: Brassica rapa probable serine/threonine-protein kinase sky1 (LOC103827554), transcript variant X2, mRNA	Q45FA5	275
BraA01g002950.3C	1.65699	0.736922	2.30637	6.95018	8.73449	9.48668	2.93407	1.92315	2.5525	2.17418	0.487411	1.98832	9.54121	11.3111	14.2298	13.3501	19.9022	15.3463	5.19431	3.81619	5.38679	5.62286	8.56094	4.63298	10.6605	4.05892	4.2063	1.48428	0.698186	0.296448	11.0853	12.9021	13.577	7.58682	7.02399	12.5133	BraA01g002950.3C	protein_coding	chrA01:1446650-1447231:+	gi|674958114|emb|CDX75506.1|	715	5e-93	BnaA01g01960D [Brassica napus]	gi|685256681|ref|XM_009103271.1|	582	0	PREDICTED: Brassica rapa RING-H2 finger protein ATL45 (LOC103827701), mRNA	Q9ZT49	236
BraA01g002960.3C	7.72136	6.29562	9.14027	8.11475	9.02266	9.87872	9.55646	9.58398	8.41965	4.75412	5.72552	3.75662	15.0004	14.8399	15.1958	9.20259	8.10695	4.13207	14.248	13.5842	12.5201	9.83609	10.6072	9.89502	18.5138	16.5866	18.6329	11.9936	12.6253	12.2936	23.2182	21.0357	19.3842	16.7133	18.0253	11.8405	BraA01g002960.3C	protein_coding	chrA01:1453290-1455547:-	gi|685256684|ref|XP_009101637.1|	2537	0	PREDICTED: plant intracellular Ras-group-related LRR protein 4-like isoform X1 [Brassica rapa]	gi|685256683|ref|XM_009103389.1|	1632	0	PREDICTED: Brassica rapa plant intracellular Ras-group-related LRR protein 4-like (LOC103827798), transcript variant X1, mRNA	Q9SVW8	799
BraA01g002970.3C	62.7892	88.3449	59.7504	54.8518	63.879	58.0844	37.7124	39.5615	35.6696	70.8891	56.1101	61.6403	80.8975	80.068	87.6924	76.4924	86.3867	76.5746	77.4445	81.7813	79.0772	61.8509	55.6706	53.1796	55.9769	72.746	69.5223	185.786	206.317	201.199	82.5017	78.7365	80.3051	158.284	176.01	139.66	BraA01g002970.3C	protein_coding	chrA01:1460458-1462140:-	gi|685256688|ref|XP_009101799.1|	1467	0	PREDICTED: ankyrin repeat domain-containing protein 2 [Brassica rapa]	gi|685256689|ref|XM_009103627.1|	637	0	PREDICTED: Brassica rapa ankyrin repeat domain-containing protein 2 (LOC103827950), transcript variant X2, mRNA	Q9SAR5	513
BraA01g002980.3C	1.11043	1.96094	0.995222	1.14965	1.41646	1.3238	0.553911	0.691549	0.642501	0.335064	0.233692	0.384991	0.428868	0.464843	0.373108	0.1905	0.11067	0.318371	0.329618	0.686136	0.541234	0.462157	0.976815	1.11065	0.203288	0.233529	0.168061	0.640484	0.778293	0.719554	0.346624	0.458223	0.344937	0.411798	0.352433	0.455666	BraA01g002980.3C	protein_coding	chrA01:1462682-1468250:+	gi|685256692|ref|XP_009101983.1|	3073	0	PREDICTED: chloride channel protein CLC-e isoform X1 [Brassica rapa]	gi|685256691|ref|XM_009103735.1|	2099	0	PREDICTED: Brassica rapa chloride channel protein CLC-e (LOC103828107), transcript variant X1, mRNA	Q8GX93	1002
BraA01g002990.3C	0	0	0	0	0	0	0	0	0	0.136634	0	0	0	0	0.0652063	0	0	0	0	0	0	0	0	0	0	0	0	0	0	0	0	0	0	0	0	0	BraA01g002990.3C	protein_coding	chrA01:1468409-1470111:-	gi|923516653|ref|XP_013649533.1|	2176	0	PREDICTED: putative F-box/LRR-repeat protein At3g18150 [Brassica napus]	gi|923516652|ref|XM_013794079.1|	1284	0	PREDICTED: Brassica napus putative F-box/LRR-repeat protein At3g18150 (LOC106354195), mRNA	.	.
BraA01g003000.3C	4.44078	10.3718	2.48575	14.1443	12.8667	16.1582	15.2068	13.2594	15.3734	10.338	11.1244	10.327	12.5517	16.4423	10.854	42.7221	39.219	40.9757	13.3662	8.70989	11.3001	14.6667	17.3785	17.1339	9.67712	7.41112	8.00021	9.03376	9.29546	9.30325	16.6531	18.0258	14.3149	13.2047	11.9613	14.1594	BraA01g003000.3C	protein_coding	chrA01:1471018-1472100:-	gi|685256698|ref|XP_009102235.1|	1065	8e-146	PREDICTED: AP-1 complex subunit sigma-1 isoform X1 [Brassica rapa]	gi|685256697|ref|XM_009103987.1|	612	0	PREDICTED: Brassica rapa AP-1 complex subunit sigma-2 (LOC103828348), transcript variant X1, mRNA	O23685	312
BraA01g003010.3C	40.8932	31.7066	43.7099	61.6763	68.863	68.083	69.7893	77.4707	76.9197	37.983	32.3514	34.4703	89.8008	91.1467	88.4507	79.7777	80.2657	122.318	43.9192	43.492	49.2999	79.2025	68.7266	69.434	74.2536	86.5915	83.6868	44.3806	41.0368	36.8222	74.3695	74.1431	70.2988	87.8028	85.7608	82.7553	BraA01g003010.3C	protein_coding	chrA01:1473578-1474486:-	gi|685256702|ref|XP_009102369.1|	909	6e-119	PREDICTED: putative DNA-binding protein ESCAROLA [Brassica rapa]	gi|685256701|ref|XM_009104121.1|	909	0	PREDICTED: Brassica rapa putative DNA-binding protein ESCAROLA (LOC103828491), mRNA	Q6DBQ1	302
BraA01g003020.3C	41.6319	28.441	39.4734	36.8608	38.3128	36.5767	34.9638	37.5361	35.112	17.8496	17.5231	17.8066	43.7858	44.3264	42.3041	23.2666	21.9182	33.2238	14.9587	28.1661	30.6278	35.7187	37.3373	37.1705	40.7287	52.8479	52.0982	19.3833	19.7189	18.9332	42.6944	40.0918	41.0393	36.7167	39.696	38.9632	BraA01g003020.3C	protein_coding	chrA01:1478370-1484963:-	gi|685256704|ref|XP_009102464.1|	8659	0	PREDICTED: brefeldin A-inhibited guanine nucleotide-exchange protein 4 [Brassica rapa]	gi|685256703|ref|XM_009104216.1|	5061	0	PREDICTED: Brassica rapa brefeldin A-inhibited guanine nucleotide-exchange protein 4 (LOC103828580), mRNA	F4JN05	3039
BraA01g003030.3C	0	0	0	0	0	0	0	0	0	0	0	0	0	0	0	0	0	0	0	0	0	0.179119	0.183557	0	0	0	0	0	0	0	0	0	0	0	0	0.353207	BraA01g003030.3C	protein_coding	chrA01:1486782-1487976:-	gi|674964672|emb|CDX69134.1|	691	4e-86	BnaC01g03190D [Brassica napus]	gi|685258250|ref|XM_009131672.1|	362	0	PREDICTED: Brassica rapa periodic tryptophan protein 1 homolog (LOC103854704), partial mRNA	Q99LL5	72
BraA01g003040.3C	13.4998	16.7826	11.0238	17.7335	17.967	17.6906	10.982	14.2782	11.6619	29.5548	32.2045	28.7043	26.1554	23.4257	26.2555	36.7532	37.7493	31.9459	24.4031	20.0375	20.6301	23.375	27.0786	23.2479	20.2659	15.9198	16.9183	25.7435	29.0772	26.9583	23.4602	25.1914	25.2066	17.734	20.0644	22.9632	BraA01g003040.3C	protein_coding	chrA01:1488243-1490426:+	gi|685256712|ref|XP_009102804.1|	1838	0	PREDICTED: uncharacterized protein At2g17340 [Brassica rapa]	gi|685256711|ref|XM_009104556.1|	1104	0	PREDICTED: Brassica rapa uncharacterized protein At2g17340 (LOC103828892), mRNA	.	.
BraA01g003050.3C	21.3649	14.4965	23.3118	74.9327	70.9179	74.0198	24.7933	24.9946	33.937	94.6032	90.5847	97.8257	54.6139	68.3155	64.3586	18.4246	20.8499	13.0438	32.3778	26.6274	28.9284	38.5	32.923	34.5942	56.5267	42.5257	40.636	44.4429	47.5776	47.6036	50.9852	56.869	61.1089	7.93446	9.32048	6.45567	BraA01g003050.3C	protein_coding	chrA01:1490722-1492008:-	gi|685256710|ref|XP_009102734.1|	1797	0	PREDICTED: xylem cysteine proteinase 1 [Brassica rapa]	gi|685256709|ref|XM_009104486.1|	1071	0	PREDICTED: Brassica rapa xylem cysteine proteinase 1 (LOC103828815), mRNA	O65493	649
BraA01g003060.3C	0.503848	0.985951	1.1143	4.26198	4.2009	4.18348	1.30853	2.05486	2.5613	3.3764	3.89462	3.15476	4.07786	3.51312	3.14002	5.78847	6.40531	6.03247	5.28035	5.0207	5.12273	8.14991	8.71895	9.18311	4.41217	5.24954	3.56076	5.04742	4.35925	6.4452	3.13464	5.41663	6.00567	7.42146	5.91904	6.35772	BraA01g003060.3C	protein_coding	chrA01:1492400-1494955:-	gi|685256706|ref|XP_009102562.1|	1727	0	PREDICTED: CMP-sialic acid transporter 4 isoform X1 [Brassica rapa]	gi|685256705|ref|XM_009104314.1|	1033	0	PREDICTED: Brassica rapa CMP-sialic acid transporter 4 (LOC103828661), transcript variant X1, mRNA	F4JN00	637
BraA01g003070.3C	12.7594	3.2217	11.7636	73.4937	78.6177	77.1837	23.4498	20.8002	27.4327	58.5584	60.5969	53.4929	55.834	55.6314	61.9671	66.297	57.1838	54.8345	58.8588	18.3521	20.5631	72.6491	92.6678	91.4269	101.951	66.9871	78.1116	64.8904	69.0595	64.3961	104.696	95.5333	104.438	88.7877	85.2496	82.8817	BraA01g003070.3C	protein_coding	chrA01:1500728-1501153:+	gi|685256714|ref|XP_009102917.1|	639	4e-83	PREDICTED: uncharacterized protein LOC103828983 [Brassica rapa]	gi|923520201|ref|XM_013810266.1|	426	0	PREDICTED: Brassica napus uncharacterized LOC106370211 (LOC106370211), mRNA	.	.
BraA01g003080.3C	147.561	132.804	142.644	95.47	94.8078	91.4624	122.547	133.816	129.147	278.103	282.346	289.708	139.898	136.702	134.247	148.026	142.45	123.595	153.999	129.085	127.843	96.8108	96.3432	94.1963	135.672	128.7	123.106	223.399	225.796	215.877	109.2	104.986	114.309	111.082	105.574	112.842	BraA01g003080.3C	protein_coding	chrA01:1502692-1505309:-	gi|923504302|ref|XP_013751938.1|	2933	0	PREDICTED: calcium-dependent protein kinase 5-like [Brassica napus]	gi|685256715|ref|XM_009104769.1|	1626	0	PREDICTED: Brassica rapa calcium-dependent protein kinase 5 (LOC103829070), mRNA	Q38871	1031
BraA01g003090.3C	3.27331	2.39236	3.54245	8.58858	7.44319	7.71057	5.26193	4.40559	4.18779	31.5916	32.8804	31.714	12.4898	13.6221	13.2332	16.9211	14.4499	11.1262	10.1594	7.27353	6.92709	9.33739	11.2066	11.0963	13.9551	12.1993	10.1967	23.8211	21.6425	21.3823	10.9359	10.7592	12.1319	7.42049	8.85257	9.66242	BraA01g003090.3C	protein_coding	chrA01:1509293-1512263:+	gi|685256718|ref|XP_009103100.1|	3249	0	PREDICTED: monosaccharide-sensing protein 2 [Brassica rapa]	gi|685256719|ref|XM_009104908.1|	2223	0	PREDICTED: Brassica rapa monosaccharide-sensing protein 2 (LOC103829162), transcript variant X2, mRNA	Q8LPQ8	1141
BraA01g003100.3C	0.349028	0.838219	0.809691	1.46399	1.08226	1.61055	0.494428	0.708913	0.896099	1.76646	1.12935	1.28868	1.7418	1.42954	1.43624	3.16917	2.29059	1.07752	0.321804	0.225077	0.266983	0.473761	0.416142	0.43373	1.63312	1.47056	0.984463	0.937952	1.20594	1.2801	0.676814	0.771697	0.559539	1.29656	1.03224	0.76739	BraA01g003100.3C	protein_coding	chrA01:1512916-1516460:-	gi|685256722|ref|XP_009103268.1|	4700	0	PREDICTED: glutamate receptor 3.2 [Brassica rapa]	gi|685256721|ref|XM_009105020.1|	2665	0	PREDICTED: Brassica rapa glutamate receptor 3.2 (LOC103829323), mRNA	Q93YT1	1547
BraA01g003110.3C	0.0707583	0.0692314	0	0	0	0.0665107	0.206735	0.0752806	0	0.218847	0	0	0.373486	0	0.0696271	0.0995397	0.0963787	0.646934	0.502341	0.57363	1.04191	0.452785	0.541337	0.483614	0.455236	0.381323	0.512255	0.697218	0.0655923	0.835511	0.452794	0.598575	0.207964	2.2862	1.68807	1.48809	BraA01g003110.3C	protein_coding	chrA01:1519026-1520887:+	gi|923507437|ref|XP_013731104.1|	1716	0	PREDICTED: ubiquitin domain-containing protein DSK2b-like isoform X3 [Brassica napus]	gi|923507436|ref|XM_013875650.1|	1091	0	PREDICTED: Brassica napus ubiquitin domain-containing protein DSK2b-like (LOC106434636), transcript variant X3, mRNA	Q9SII8	487
BraA01g003130.3C	0.216239	0.362697	0.315317	0.684145	0.73756	0.783996	0.872468	0.75591	0.663038	3.75802	3.69835	3.45021	1.69577	1.75627	1.48947	0.999501	0.841531	1.12974	0.595269	0.84521	0.7148	0.955427	0.979099	1.16124	1.52371	1.66476	1.43767	1.18711	1.00226	1.42866	3.12991	2.5479	2.84482	1.67328	0.870963	1.07194	BraA01g003130.3C	protein_coding	chrA01:1529807-1533773:+	gi|685256726|ref|XP_009103570.1|	4708	0	PREDICTED: protein NLP2 [Brassica rapa]	gi|685256733|ref|XM_009105560.1|	1926	0	PREDICTED: Brassica rapa protein NLP2 (LOC103829610), transcript variant X5, mRNA	Q7X9B9	1471
BraA01g003140.3C	47.7259	38.8486	48.4722	68.2228	68.2564	70.0158	39.8292	47.0588	40.458	72.6999	66.6358	73.6958	78.8853	79.2215	75.4845	72.0541	72.2537	69.389	68.4576	70.091	63.2267	64.366	63.4438	62.2356	81.5743	83.8786	82.292	61.1114	59.3322	63.9185	83.508	83.0476	85.0335	55.2394	58.9875	66.1341	BraA01g003140.3C	protein_coding	chrA01:1536508-1538695:+	gi|685256736|ref|XP_009103898.1|	1825	0	PREDICTED: isocitrate dehydrogenase [NAD] regulatory subunit 1, mitochondrial [Brassica rapa]	gi|685256735|ref|XM_009105650.1|	1104	0	PREDICTED: Brassica rapa isocitrate dehydrogenase [NAD] regulatory subunit 1, mitochondrial (LOC103829929), mRNA	Q8LFC0	679
BraA01g003150.3C	18.7976	15.3009	16.4463	18.4394	17.4208	17.7434	13.8456	16.3017	17.5768	24.1023	25.8969	24.1384	17.8429	16.5212	17.3313	28.6658	29.3692	23.0046	23.2299	25.0515	21.1832	20.132	20.8898	18.7137	22.7817	17.8768	18.6239	31.052	27.9682	28.9109	22.8279	22.8838	22.3622	16.5873	16.9582	19.1849	BraA01g003150.3C	protein_coding	chrA01:1539187-1541603:-	gi|685256738|ref|XP_009104001.1|	1989	0	PREDICTED: glycerol-3-phosphate acyltransferase 3-like [Brassica rapa]	gi|685256737|ref|XM_009105753.1|	1110	0	PREDICTED: Brassica rapa glycerol-3-phosphate acyltransferase 3-like (LOC103830019), mRNA	Q8GWG0	731
BraA01g003160.3C	26.9033	17.2436	27.1077	32.7818	33.7371	31.8952	25.3919	26.7441	24.0552	16.7417	14.2658	15.75	16.2657	15.6368	15.7749	34.4856	34.5223	23.5617	21.737	25.5786	25.9293	33.05	40.4156	42.8731	17.1157	16.6443	18.0121	13.6129	13.1276	13.1853	13.2572	15.048	12.4831	38.8262	28.01	26.3963	BraA01g003160.3C	protein_coding	chrA01:1550476-1553189:+	gi|685256740|ref|XP_009104109.1|	2768	0	PREDICTED: uncharacterized protein LOC103830114 [Brassica rapa]	gi|685256739|ref|XM_009105861.1|	2458	0	PREDICTED: Brassica rapa uncharacterized LOC103830114 (LOC103830114), mRNA	Q93YU8	114
BraA01g003170.3C	35.1024	42.9735	31.7117	44.6254	43.9728	46.1066	40.5857	37.1006	38.9376	23.5318	23.3131	21.0102	29.4504	33.6356	33.3501	44.1911	44.358	51.7203	31.918	45.0922	45.953	45.4284	50.4597	49.8347	32.5716	35.9081	33.5017	28.0568	28.0514	26.5435	34.3025	36.5698	34.8978	67.0438	63.6918	56.3668	BraA01g003170.3C	protein_coding	chrA01:1559948-1562684:+	gi|685256743|ref|XP_009104299.1|	2352	0	PREDICTED: probable serine/threonine-protein kinase At4g35230 [Brassica rapa]	gi|685256742|ref|XM_009106051.1|	1046	0	PREDICTED: Brassica rapa probable serine/threonine-protein kinase At4g35230 (LOC103830257), mRNA	Q944A7	865
BraA01g003190.3C	0	0.46492	0.242512	0	0.540249	0	0	0.758314	0.268393	0	0.256254	0	0	0.509721	0.467577	0.668454	0	0	0.24096	0.240761	0.499779	0	0	0.270641	0	0	0	0.234107	0	0	0.506785	0	0.232762	0.677332	0.257639	0	BraA01g003190.3C	protein_coding	chrA01:1581217-1581779:-	gi|685256749|ref|XP_009104592.1|	537	2e-68	PREDICTED: uncharacterized protein LOC103830508 [Brassica rapa]	gi|685256748|ref|XM_009106344.1|	366	0	PREDICTED: Brassica rapa uncharacterized LOC103830508 (LOC103830508), mRNA	.	.
BraA01g003210.3C	8.07623	10.6053	11.2808	11.4731	10.7529	10.4881	9.83181	8.14016	7.32273	25.7456	23.1523	23.6296	24.4556	22.4565	23.0048	41.7079	47.1863	53.7143	37.1824	30.0444	28.501	23.2334	16.9567	18.5207	15.6107	12.9425	12.0892	25.7585	24.5284	27.8144	21.4204	16.2935	20.7175	18.985	15.672	21.1192	BraA01g003210.3C	protein_coding	chrA01:1590290-1591592:-	gi|685256757|ref|XP_009104931.1|	1342	0	PREDICTED: uncharacterized protein LOC103830834 [Brassica rapa]	gi|685256756|ref|XM_009106683.1|	825	0	PREDICTED: Brassica rapa uncharacterized LOC103830834 (LOC103830834), mRNA	Q94JT5	481
BraA01g003220.3C	0.124354	1.21671	1.52318	0.229504	0	0	1.08998	0	0.421433	1.15383	1.073	0.378789	0	0	0.367098	0	0	0	0.630598	0	0.392379	0.265248	0.951371	0.849926	0.400027	0	0	0	0.576375	0.367091	1.45889	1.31496	1.34012	0.118173	0	0.130762	BraA01g003220.3C	protein_coding	chrA01:1592109-1593394:-	gi|685256759|ref|XP_009105030.1|	1252	3e-173	PREDICTED: cytokinin riboside 5'-monophosphate phosphoribohydrolase LOG5-like [Brassica rapa]	gi|685256758|ref|XM_009106782.1|	705	0	PREDICTED: Brassica rapa cytokinin riboside 5'-monophosphate phosphoribohydrolase LOG5-like (LOC103830928), mRNA	Q8LBB7	400
BraA01g003230.3C	0.911326	2.85331	0.80619	0.672766	0.828906	0.513971	1.30173	1.09885	1.09812	3.38234	3.47302	3.94802	2.2448	0.912411	2.212	0.598273	0	0.555476	4.19	2.70894	3.64236	2.9806	2.72244	1.45336	1.56351	1.37514	1.63368	3.59191	3.2102	3.04892	2.52708	2.31279	2.14277	11.2584	11.6613	18.9101	BraA01g003230.3C	protein_coding	chrA01:1599469-1601350:+	gi|923511563|ref|XP_013746828.1|	2263	0	PREDICTED: lysine histidine transporter-like 7 [Brassica napus]	gi|685256760|ref|XM_009106895.1|	1443	0	PREDICTED: Brassica rapa lysine histidine transporter-like 7 (LOC103831015), mRNA	Q84WE9	702
BraA01g003240.3C	3.50398	4.59401	3.33818	4.61301	4.62127	4.39151	4.66379	3.37999	3.48331	3.94962	3.80448	4.00843	3.64971	4.18472	3.76977	8.14969	7.66816	6.28524	5.47275	6.06003	4.96303	5.43113	5.89759	6.17346	2.80541	3.37381	2.72998	4.18922	4.24426	4.2754	3.83674	3.28529	4.37113	6.50423	4.30635	4.10211	BraA01g003240.3C	protein_coding	chrA01:1603244-1608377:+	gi|685256767|ref|XP_009105444.1|	4200	0	PREDICTED: pentatricopeptide repeat-containing protein At4g35130, chloroplastic [Brassica rapa]	gi|685256766|ref|XM_009107196.1|	2425	0	PREDICTED: Brassica rapa pentatricopeptide repeat-containing protein At4g35130, chloroplastic (LOC103831270), mRNA	O49619	1259
BraA01g003250.3C	114.961	93.7333	109.209	100.587	105.992	95.8006	134.384	136.355	147.055	115.449	122.256	120.24	84.6461	90.8483	93.3183	69.649	74.0165	110.617	59.7661	65.9169	62.2348	64.3081	74.1721	66.3942	43.8524	50.1527	50.455	38.3935	39.4031	41.4301	57.0971	54.567	61.5973	112.919	98.9974	75.1717	BraA01g003250.3C	protein_coding	chrA01:1615274-1616473:+	gi|922407215|ref|XP_013616383.1|	1384	0	PREDICTED: uncharacterized protein LOC106322790 [Brassica oleracea var. oleracea]	gi|685256776|ref|XM_009107552.1|	1029	0	PREDICTED: Brassica rapa uncharacterized LOC103831458 (LOC103831458), transcript variant X4, mRNA	.	.
BraA01g003260.3C	0	0	0	0	0	0	0	0	0.292144	0	0	0	0	0	0	0	0	0	0	0	0	0	0	0	0	0	0	0	0	0	0	0	0	0	0	0	BraA01g003260.3C	protein_coding	chrA01:1617228-1617566:-	.	.	.	.	.	.	.	.	.	.
BraA01g003270.3C	40.4151	78.8831	44.2147	83.8645	87.7761	87.4719	38.0483	30.5396	28.798	72.4351	79.5805	78.3884	53.9327	53.0245	57.308	127.266	127.318	60.9082	148.716	78.0246	80.9827	77.5852	63.1982	67.5219	61.2263	41.6613	43.0839	90.1634	94.9097	90.3453	91.5125	89.8553	93.5036	36.0427	29.8917	45.2217	BraA01g003270.3C	protein_coding	chrA01:1620130-1621403:-	gi|685256779|ref|XP_009105909.1|	1470	0	PREDICTED: aquaporin PIP2-7 [Brassica rapa]	gi|685256778|ref|XM_009107661.1|	846	0	PREDICTED: Brassica rapa aquaporin PIP2-7 (LOC103831723), mRNA	P93004	551
BraA01g003280.3C	0.471342	0.0576463	0.240557	0.0543683	0	0.0553808	0	0	0.066557	0	0	0	0	0.126403	0	0	0	0	27.2479	28.8375	25.2212	12.3787	9.40137	10.537	20.3428	13.7165	14.2584	5.92158	6.49932	6.6671	8.16885	6.91544	6.75339	2.79946	3.83342	3.71722	BraA01g003280.3C	protein_coding	chrA01:1631727-1633925:+	gi|685256782|ref|XP_009106100.1|	2624	0	PREDICTED: catalase-2 [Brassica rapa]	gi|685256781|ref|XM_009107852.1|	1460	0	PREDICTED: Brassica rapa catalase-2 (LOC103831878), mRNA	P25819	994
BraA01g003290.3C	56.3999	61.1897	61.5798	48.4947	49.9776	49.6287	75.8947	49.9022	49.8421	23.7141	19.4236	25.1006	49.2562	48.2072	47.685	42.3766	45.2678	56.3449	32.0457	57.8171	53.1214	57.1826	56.0944	60.0504	53.8057	54.4364	51.2183	20.1646	21.4744	19.3314	55.3503	60.2448	57.3397	80.9004	67.4626	64.7288	BraA01g003290.3C	protein_coding	chrA01:1635475-1637125:-	gi|685256784|ref|XP_009106209.1|	1446	0	PREDICTED: uncharacterized protein LOC103831976 [Brassica rapa]	gi|685256783|ref|XM_009107961.1|	1068	0	PREDICTED: Brassica rapa uncharacterized LOC103831976 (LOC103831976), mRNA	.	.
BraA01g003300.3C	5.79198	9.27327	5.91206	9.8392	9.42881	11.631	8.07663	7.4226	8.03002	29.0422	31.8032	32.4786	22.79	28.3825	26.4244	44.6283	43.749	49.3448	27.1015	47.2217	51.3658	48.2943	37.262	37.4874	42.7686	65.1227	68.6144	51.7534	49.0542	54.9204	33.8348	42.1763	39.9785	131.723	117.195	87.896	BraA01g003300.3C	protein_coding	chrA01:1640083-1640823:-	gi|685256786|ref|XP_009106315.1|	1097	4e-150	PREDICTED: probable BOI-related E3 ubiquitin-protein ligase 2 [Brassica rapa]	gi|685256785|ref|XM_009108067.1|	666	0	PREDICTED: Brassica rapa probable BOI-related E3 ubiquitin-protein ligase 2 (LOC103832075), mRNA	Q9LDD1	88.2
BraA01g003310.3C	4.3645	2.59933	3.6802	7.35455	6.68821	7.31315	3.69617	5.24911	6.2166	39.714	37.25	40.2689	20.6334	24.0198	23.3409	24.2922	18.8683	24.0416	7.12085	7.30726	7.98348	5.26191	3.31833	4.53938	8.95298	9.40827	10.5977	16.2674	18.822	16.0583	19.429	18.4606	16.174	5.59019	5.3502	6.1857	BraA01g003310.3C	protein_coding	chrA01:1650550-1651090:+	gi|685256788|ref|XP_009106425.1|	800	4e-107	PREDICTED: heavy metal-associated isoprenylated plant protein 26 [Brassica rapa]	gi|923735749|ref|XM_013814271.1|	462	0	PREDICTED: Brassica napus heavy metal-associated isoprenylated plant protein 26-like (LOC106374189), mRNA	O49613	301
BraA01g003320.3C	48.6213	15.159	46.5436	53.236	55.9961	55.293	52.6274	42.482	47.384	23.8945	19.8354	25.1955	86.566	90.2602	91.9696	67.8668	66.3979	69.7573	20.4401	22.3379	23.0523	44.7349	47.7707	51.368	32.9562	29.325	31.0046	20.3552	21.7184	21.1948	72.2759	71.9258	69.7233	30.6434	28.8212	25.6958	BraA01g003320.3C	protein_coding	chrA01:1654144-1654839:-	gi|685256791|ref|XP_009106517.1|	1185	5e-163	PREDICTED: uncharacterized protein LOC103832273 [Brassica rapa]	gi|685256790|ref|XM_009108269.1|	690	0	PREDICTED: Brassica rapa uncharacterized LOC103832273 (LOC103832273), mRNA	Q8VY76	318
BraA01g003350.3C	0.24302	0.178332	0.248058	1.06521	1.17428	0.685295	1.00588	1.03421	0.960857	1.5659	1.76927	1.48051	0.577234	1.49896	1.13589	0.427338	0.165507	0.555476	0.492942	0.861935	1.21412	1.81428	0.66401	1.66098	1.23778	1.44062	1.00534	0.838111	1.12639	0.478262	2.1383	2.24855	1.72612	0.866027	0.724711	0.511085	BraA01g003350.3C	protein_coding	chrA01:1670117-1674296:-	gi|685256793|ref|XP_009106626.1|	2313	0	PREDICTED: receptor-like cytosolic serine/threonine-protein kinase RBK2 isoform X1 [Brassica rapa]	gi|685256796|ref|XM_009108527.1|	1348	0	PREDICTED: Brassica rapa probable receptor-like serine/threonine-protein kinase At5g57670 (LOC103832352), transcript variant X3, mRNA	Q5XF57	243
BraA01g003360.3C	8.22361	19.397	8.2442	11.7895	11.1864	14.6317	13.0146	12.0301	9.45578	15.291	17.7395	13.8667	12.0919	9.76667	10.4042	6.81722	9.40104	6.90496	46.021	43.602	39.3858	44.3225	42.8527	36.8017	20.3129	13.6119	18.3768	32.4126	29.1316	28.7555	34.6129	31.8331	32.2265	13.8155	17.1984	18.3756	BraA01g003360.3C	protein_coding	chrA01:1676612-1678176:-	gi|685256807|ref|XP_009107160.1|	954	5e-129	PREDICTED: rac-like GTP-binding protein ARAC3 [Brassica rapa]	gi|923923802|ref|XM_013875564.1|	597	0	PREDICTED: Brassica napus rac-like GTP-binding protein ARAC3 (LOC106434708), transcript variant X1, mRNA	Q38912	369
BraA01g003370.3C	0.0690856	0.101392	0.141036	0.255004	0.157094	0.129877	0.370054	0.220503	0.0780432	0.249285	0.11177	0.140292	0.0729313	0.148217	0.203943	0	0	0.0451172	0.1051	0.210026	0.0726628	0.1842	0.0377528	0.196742	0.0370395	0.0744616	0.214348	0.272294	0.224146	0.27192	0.147363	0.0730531	0.0676826	0.492387	0.187291	0.181613	BraA01g003370.3C	protein_coding	chrA01:1679162-1683189:+	gi|685256809|ref|XP_009107264.1|	4506	0	PREDICTED: beta-galactosidase 11 [Brassica rapa]	gi|685256808|ref|XM_009109016.1|	2538	0	PREDICTED: Brassica rapa beta-galactosidase 11 (LOC103832885), mRNA	Q9SCV1	1579
BraA01g003380.3C	52.6418	41.6159	54.346	44.4212	40.3938	43.7433	143.375	82.9445	80.4957	81.5104	88.7289	83.7315	54.9382	57.3279	50.8154	15.205	23.5827	27.9733	17.8641	12.17	14.6314	20.9201	16.2976	15.0484	29.9404	33.6546	34.4667	47.2358	46.2008	50.1252	22.6283	27.9383	23.5313	54.7804	37.8756	27.5719	BraA01g003380.3C	protein_coding	chrA01:1686531-1688167:+	gi|685256811|ref|XP_009107363.1|	1338	0	PREDICTED: transcription factor MYB32-like [Brassica rapa]	gi|685256810|ref|XM_009109115.1|	857	0	PREDICTED: Brassica rapa transcription factor MYB32-like (LOC103832978), mRNA	O49608	396
BraA01g003390.3C	1.83922	1.59959	1.87735	1.6972	2.0911	1.34463	0.796098	1.52193	1.15428	3.37095	1.5429	3.11243	4.74614	3.50745	3.82072	0.862446	0.835058	1.33458	10.9848	6.62683	5.15855	3.05128	3.35023	2.32789	3.28693	2.86339	2.5362	2.61774	4.16763	3.2174	4.35906	0.864376	1.40146	3.6898	2.65927	2.57866	BraA01g003390.3C	protein_coding	chrA01:1690029-1690659:-	gi|685256813|ref|XP_009107450.1|	762	1e-101	PREDICTED: actin-depolymerizing factor 9 [Brassica rapa]	gi|685256812|ref|XM_009109202.1|	429	0	PREDICTED: Brassica rapa actin-depolymerizing factor 9 (LOC103833075), mRNA	O49606	269
BraA01g003400.3C	14.4168	28.8467	18.03	29.3637	36.1787	31.7418	25.9307	30.9527	33.7459	37.0908	32.6399	32.8368	31.1241	34.9703	34.1238	65.4104	59.972	64.1241	43.7327	34.6151	30.873	40.7245	43.7208	52.8182	30.6391	28.9775	30.7603	35.45	32.7483	34.5066	32.691	37.9058	38.173	39.8663	41.9712	55.039	BraA01g003400.3C	protein_coding	chrA01:1693999-1695582:-	gi|685256816|ref|XP_009107596.1|	1033	3e-140	PREDICTED: peptidyl-prolyl cis-trans isomerase CYP21-1 [Brassica rapa]	gi|685256815|ref|XM_009109348.1|	675	0	PREDICTED: Brassica rapa peptidyl-prolyl cis-trans isomerase CYP21-1 (LOC103833231), mRNA	O49605	384
BraA01g003410.3C	55.572	30.78	49.0087	177.175	177.383	171.068	73.3545	73.6214	76.8483	34.573	33.0694	32.8606	120.702	126.362	119.686	77.2777	75.8386	26.3499	40.5972	41.6425	44.6209	73.6306	71.848	73.49	108.276	95.5245	98.7065	17.833	18.3558	20.375	157.88	154.226	148.416	203.853	226.965	234.022	BraA01g003410.3C	protein_coding	chrA01:1700838-1703139:+	gi|685256818|ref|XP_009107674.1|	2365	0	PREDICTED: probable transporter mch1 [Brassica rapa]	gi|685256817|ref|XM_009109426.1|	1647	0	PREDICTED: Brassica rapa probable transporter mch1 (LOC103833311), mRNA	F4I9E1	120
BraA01g003420.3C	0	0.0849705	0	0	0	0.0408156	0	0	0	0	0	0.0440889	0	0	0.0854561	0	0	0	0.176155	0.264015	0.0913414	0.0926202	0	0.0494633	0.139683	0.0468013	0.269447	0.0427862	0.120756	0	0.046311	0.183664	0	0.412639	0.376697	0.684896	BraA01g003420.3C	protein_coding	chrA01:1703967-1705985:-	gi|685256820|ref|XP_009107761.1|	3364	0	PREDICTED: uncharacterized protein LOC103833399 [Brassica rapa]	gi|685256819|ref|XM_009109513.1|	2019	0	PREDICTED: Brassica rapa uncharacterized LOC103833399 (LOC103833399), mRNA	.	.
BraA01g003430.3C	5.77516	9.68664	5.54031	13.7037	12.8853	11.9182	13.8285	14.044	13.0479	9.84864	8.66428	8.55325	13.4309	14.6725	13.7157	26.8161	25.9645	17.1846	8.67564	7.56842	8.08371	8.65999	11.722	12.811	10.7556	9.96867	9.56538	6.71743	8.09066	8.20365	8.70647	8.31079	7.23188	12.7505	8.52277	11.3236	BraA01g003430.3C	protein_coding	chrA01:1707691-1710650:-	gi|685256822|ref|XP_009107860.1|	2390	0	PREDICTED: DEAD-box ATP-dependent RNA helicase 16 [Brassica rapa]	gi|685256821|ref|XM_009109612.1|	726	0	PREDICTED: Brassica rapa DEAD-box ATP-dependent RNA helicase 16 (LOC103833493), mRNA	Q9SW44	791
BraA01g003440.3C	44.4804	33.5826	43.162	30.6999	32.1488	30.3817	13.7692	16.3697	16.3117	20.3441	20.0535	19.5773	21.7631	20.2907	20.6247	8.96063	9.70196	16.9203	26.1025	42.1307	40.5367	25.016	23.2368	21.9882	22.7978	25.0494	26.5954	19.4017	19.0705	18.0833	24.0066	24.348	22.2418	27.3207	28.236	25.7282	BraA01g003440.3C	protein_coding	chrA01:1711679-1718025:+	gi|923923879|ref|XP_013731051.1|	6746	0	PREDICTED: xanthine dehydrogenase 1 isoform X1 [Brassica napus]	gi|923923880|ref|XM_013875598.1|	4071	0	PREDICTED: Brassica napus xanthine dehydrogenase 1 (LOC106434738), transcript variant X2, mRNA	Q8GUQ8	2436
BraA01g003450.3C	0.481701	0.0785511	0.737531	0.296337	0	0.075464	0.547317	0.341658	0.453466	2.31753	1.73183	1.63032	0.593268	0.172241	0.553	0.112939	0.109353	0	0.895657	1.13899	1.35105	0.856228	0.61421	0.182905	2.23825	1.21143	1.57758	2.68965	3.86995	2.36996	2.14061	3.05619	2.04498	1.29698	1.04471	1.18188	BraA01g003450.3C	protein_coding	chrA01:1718294-1719965:-	gi|685256824|ref|XP_009107945.1|	1834	0	PREDICTED: putative amidase C869.01 [Brassica rapa]	gi|685256823|ref|XM_009109697.1|	1087	0	PREDICTED: Brassica rapa putative amidase C869.01 (LOC103833589), mRNA	A0A1P8B760	583
BraA01g003460.3C	125.728	271.796	125.906	462.353	486.21	484.059	343.015	388.094	390.965	700.823	715.963	701.946	538.439	558.794	554.89	577.451	582.255	496.864	715.45	488.969	470.874	591.624	588.084	550.62	390.6	340.976	324.722	695.101	645.426	702.503	446.308	469.989	492.032	216.514	212.8	256.73	BraA01g003460.3C	protein_coding	chrA01:1721093-1721608:-	gi|685256828|ref|XP_009108112.1|	687	2e-89	PREDICTED: peptidyl-prolyl cis-trans isomerase [Brassica rapa]	gi|685256827|ref|XM_009109864.1|	516	0	PREDICTED: Brassica rapa peptidyl-prolyl cis-trans isomerase (LOC103833770), mRNA	Q42406	258
BraA01g003470.3C	1.23261	3.11554	1.52028	2.65402	2.16052	2.65517	1.75065	1.96709	2.20469	1.80026	3.26825	3.28528	2.71089	2.14862	2.57743	5.5632	6.08609	5.70189	8.69871	8.32721	9.50721	6.62771	5.89382	5.55788	2.64341	3.65346	3.71812	5.4149	5.57027	6.46872	5.31323	4.45328	4.83033	2.34269	2.84037	2.48424	BraA01g003470.3C	protein_coding	chrA01:1724793-1726720:+	gi|685256832|ref|XP_009108292.1|	2998	0	PREDICTED: alkaline/neutral invertase CINV2 [Brassica rapa]	gi|685256833|ref|XM_009110105.1|	1707	0	PREDICTED: Brassica rapa alkaline/neutral invertase CINV2 (LOC103833964), transcript variant X2, mRNA	Q9SW48	1107
BraA01g003480.3C	0	0	0	0	0	0	0	0	0	0.0766613	0	0	0	0	0	0	0	0	0.226245	0.376764	0	0.0793046	0.162539	0	0	0.0801457	0	0.07327	0	0	0	0	0	0	0.0806352	0	BraA01g003480.3C	protein_coding	chrA01:1726951-1728303:-	gi|685256830|ref|XP_009108194.1|	2084	0	PREDICTED: chalcone synthase-like [Brassica rapa]	gi|685256829|ref|XM_009109946.1|	1179	0	PREDICTED: Brassica rapa chalcone synthase-like (LOC103833867), mRNA	Q8LDM2	758
BraA01g003490.3C	0.372745	0.316075	0.63412	0.389825	0.423792	0.4438	0.266212	0.37013	0.16843	0.204952	0.268021	0.252312	0.236096	0.079969	0.317881	0.419489	0.37232	0.292111	0.554455	0.478452	0.548864	0.159014	0.353066	0.283068	0.293104	0.535668	0.308398	0.318313	0.529814	0.464587	0.238525	0.236491	0.14607	0.259759	0.107788	0.156781	BraA01g003490.3C	protein_coding	chrA01:1729064-1734775:+	gi|685256836|ref|XP_009108450.1|	5609	0	PREDICTED: pentatricopeptide repeat-containing protein MRL1, chloroplastic isoform X1 [Brassica rapa]	gi|685256835|ref|XM_009110202.1|	2989	0	PREDICTED: Brassica rapa pentatricopeptide repeat-containing protein MRL1, chloroplastic (LOC103834109), transcript variant X1, mRNA	Q0WLC6	1660
BraA01g003500.3C	0	0	0	0	0	0	0	0	0	0	0	0	0	0	0.273866	0	0	0	0.846803	0	0	0	0.30418	0.317036	0	0	0.575677	0	0	0	0.890494	0.294299	0.817993	2.64482	0.603612	0	BraA01g003500.3C	protein_coding	chrA01:1735253-1735567:-	gi|685256842|ref|XP_009108669.1|	540	2e-69	PREDICTED: auxin-induced protein 15A [Brassica rapa]	gi|685256841|ref|XM_009110421.1|	315	2e-163	PREDICTED: Brassica rapa auxin-induced protein 15A (LOC103834323), mRNA	Q9FJF6	101
BraA01g003510.3C	0.314228	0.307447	0.962227	2.31972	2.14357	2.06755	1.22411	1.33724	0.354971	3.23956	2.0335	1.91431	4.64407	5.73025	7.4209	23.8703	24.8243	7.79799	2.54952	0.955279	2.31349	4.69176	4.80801	6.08505	5.0541	5.41888	3.24979	1.54812	1.74772	1.85519	15.7512	11.6296	13.8531	14.9304	12.9485	15.8601	BraA01g003510.3C	protein_coding	chrA01:1737717-1737995:-	gi|685256844|ref|XP_009108765.1|	480	2e-60	PREDICTED: auxin-induced protein 15A [Brassica rapa]	gi|685256843|ref|XM_009110517.1|	279	2e-143	PREDICTED: Brassica rapa auxin-induced protein 15A (LOC103834414), mRNA	P33079	98.6
BraA01g003520.3C	0	0	0	0	0	0	0	0	0	0	0	0	0	0	0	0	0	0	0	0	0	0	0	0	0	0	0	0	0.511125	0	0	0.291523	0	0	0	0	BraA01g003520.3C	protein_coding	chrA01:1739998-1740315:-	gi|685256846|ref|XP_009108859.1|	553	3e-71	PREDICTED: auxin-induced protein 15A [Brassica rapa]	gi|685256845|ref|XM_009110611.1|	318	4e-165	PREDICTED: Brassica rapa auxin-induced protein 15A (LOC103834513), mRNA	Q9FJG0	96.7
BraA01g003530.3C	0	0	0	0	0	0	0	0	0	0	0	0	0.587618	1.79131	0.821599	1.95762	1.51636	0.363515	0	0	0	1.1873	0	0	0	0.299974	0	0	0	0	6.82712	4.70879	6.81661	1.05793	1.50903	0.585314	BraA01g003530.3C	protein_coding	chrA01:1744623-1744937:-	gi|685256848|ref|XP_009108953.1|	551	5e-71	PREDICTED: auxin-induced protein 15A [Brassica rapa]	gi|923923830|ref|XM_013875577.1|	315	2e-163	PREDICTED: Brassica napus auxin-induced protein 15A-like (LOC106434720), mRNA	P33081	108
BraA01g003540.3C	0	0	0	2.9963	4.92227	2.03473	3.4258	4.0303	5.80772	4.74235	2.33476	7.14322	3.42777	3.77335	4.5264	11.8001	10.6882	9.54228	4.93969	2.1936	1.70758	5.77161	10.942	12.3292	3.48172	3.79134	2.23874	3.19946	6.27075	6.12385	13.275	10.8727	12.9894	5.91411	5.28161	6.82866	BraA01g003540.3C	protein_coding	chrA01:1756341-1756664:+	gi|685256850|ref|XP_009109058.1|	570	9e-74	PREDICTED: auxin-induced protein 15A [Brassica rapa]	gi|923923823|ref|XM_013875574.1|	324	2e-168	PREDICTED: Brassica napus auxin-induced protein 15A-like (LOC106434717), mRNA	O65695	219
BraA01g003550.3C	0	0.595679	0.621438	1.68542	1.38439	1.90756	1.58114	1.72727	1.37551	0.627664	2.84549	1.03027	3.85624	3.70079	3.19511	14.5598	11.6096	5.83139	6.79207	3.2904	5.12273	8.00811	20.1836	18.2626	8.48668	6.12447	6.50634	5.59905	5.0793	6.78949	14.9343	18.455	14.7125	15.8138	14.3044	19.6324	BraA01g003550.3C	protein_coding	chrA01:1762290-1762721:-	gi|685256852|ref|XP_009109163.1|	753	2e-100	PREDICTED: uncharacterized protein LOC103834796 [Brassica rapa]	gi|923923828|ref|XM_013875576.1|	432	0	PREDICTED: Brassica napus auxin-responsive protein SAUR72-like (LOC106434719), mRNA	O65695	76.6
BraA01g003570.3C	0.946075	0.719957	1.23393	3.34659	3.70498	3.21129	1.94514	1.00654	1.00937	4.00983	2.83447	2.98853	4.77175	3.94667	3.62036	7.61569	8.94883	3.56977	1.91901	2.34353	2.37709	2.18615	3.27431	3.77193	6.19946	3.96548	4.23992	3.15918	3.16695	3.20655	3.53155	3.22353	4.47984	6.94265	5.30061	4.03456	BraA01g003570.3C	protein_coding	chrA01:1765637-1767304:+	gi|685256854|ref|XP_009109269.1|	2761	0	PREDICTED: amidophosphoribosyltransferase 2, chloroplastic [Brassica rapa]	gi|685256853|ref|XM_009111021.1|	1668	0	PREDICTED: Brassica rapa amidophosphoribosyltransferase 2, chloroplastic (LOC103834893), mRNA	Q9STG9	978
BraA01g003580.3C	0.54117	1.72085	1.10478	1.74784	0.922926	1.27171	2.76699	1.72727	1.52835	0.418443	0.291845	0.412109	0.714119	0.580516	0.266259	3.2355	3.13275	0.883544	1.37213	1.5081	2.13447	1.4429	2.07011	1.0788	0.580286	0.437462	0.419764	0.799864	0.75249	0.399382	0.577172	0.286124	0.397635	0.385703	0.293423	0.142264	BraA01g003580.3C	protein_coding	chrA01:1767728-1768811:+	gi|685256856|ref|XP_009109369.1|	1139	1e-156	PREDICTED: probable ribosome-binding factor A, chloroplastic [Brassica rapa]	gi|685256857|ref|XM_009111194.1|	648	0	PREDICTED: Brassica rapa probable ribosome-binding factor A, chloroplastic (LOC103834996), transcript variant X2, mRNA	O65693	379
BraA01g003590.3C	162.941	178.834	171.381	243.844	238.216	230.239	175.938	174.486	187.07	258.187	279.28	270.104	237.264	244.513	262.812	374.972	392.254	395.339	302.129	264.907	265.637	265.956	256.092	262.477	252.013	216.663	221.086	295.804	285.508	284.418	262.75	262.569	273.458	232.432	237.576	266.877	BraA01g003590.3C	protein_coding	chrA01:1769606-1770461:+	gi|15227232|ref|NP_179244.1|	571	4e-72	ATPase, F0/V0 complex, subunit C protein [Arabidopsis thaliana]	gi|685256859|ref|XM_009111311.1|	495	0	PREDICTED: Brassica rapa V-type proton ATPase 16 kDa proteolipid subunit c1 (LOC103835158), mRNA	P0DH94	224
BraA01g003600.3C	2.78731	0.553955	1.91155	0.602832	1.2379	0.90062	2.88422	1.7144	1.62356	4.5349	5.12012	4.73158	2.57466	1.82201	1.67136	0.612666	0.355926	0.398187	1.81097	1.54468	1.69485	1.06831	0.666385	0.595329	4.01617	4.50631	3.69342	6.35123	6.01543	6.68533	4.50556	3.96054	2.77337	0.703577	1.039	0.915916	BraA01g003600.3C	protein_coding	chrA01:1774213-1780439:+	gi|674958065|emb|CDX75457.1|	3215	0	BnaA01g02450D [Brassica napus]	gi|923923812|ref|XM_013875568.1|	1858	0	PREDICTED: Brassica napus arginine decarboxylase 2-like (LOC106434712), mRNA	O23141	1041
BraA01g003610.3C	0.720449	0.616789	0.551538	0.955677	0.66553	0.634874	0.92091	1.10183	0.661263	1.4855	1.50554	1.6459	0.52288	0.386414	0.70893	0.633435	0.367991	0.176437	1.78103	1.41452	1.04191	1.53672	1.47637	1.84653	0.72424	0.679448	0.605392	1.5529	1.29396	1.15199	0.576283	0.571367	1.05873	0.427899	0.292971	0.426134	BraA01g003610.3C	protein_coding	chrA01:1783014-1785486:+	gi|674958064|emb|CDX75456.1|	3112	0	BnaA01g02460D [Brassica napus]	gi|923923812|ref|XM_013875568.1|	1318	0	PREDICTED: Brassica napus arginine decarboxylase 2-like (LOC106434712), mRNA	O23141	1013
BraA01g003620.3C	20.803	24.4733	18.9591	37.0221	30.9728	35.8492	28.2193	23.9769	28.8158	44.6812	46.7447	45.2621	38.1702	38.255	41.4281	53.3035	62.0679	49.8139	65.8067	55.4628	55.2213	55.4661	48.4497	43.4447	40.8954	33.6327	28.4301	38.8002	45.685	42.4022	50.4488	46.3522	56.289	28.712	28.467	32.0311	BraA01g003620.3C	protein_coding	chrA01:1786199-1787272:-	gi|685256862|ref|XP_009109779.1|	623	2e-81	PREDICTED: NADH dehydrogenase [ubiquinone] 1 beta subcomplex subunit 9-like [Brassica rapa]	gi|923504598|ref|XM_013792839.1|	354	0	PREDICTED: Brassica napus NADH dehydrogenase [ubiquinone] 1 beta subcomplex subunit 9-like (LOC106353122), mRNA	Q945M1	236
BraA01g003630.3C	11.3053	15.1311	13.0638	16.928	20.2505	16.8422	31.4727	29.6158	28.5544	6.04757	5.29155	5.0897	14.2991	16.246	16.8968	8.10195	9.73319	9.89054	11.1413	13.5099	13.0125	18.882	22.8468	19.0742	17.4975	12.5299	12.9054	4.41385	4.05356	5.66714	26.0486	21.2025	21.9425	17.1286	13.1847	20.0748	BraA01g003630.3C	protein_coding	chrA01:1788424-1789324:-	gi|685256865|ref|XP_009110008.1|	1246	5e-171	PREDICTED: GATA transcription factor 3 [Brassica rapa]	gi|923504604|ref|XM_013793031.1|	822	0	PREDICTED: Brassica napus GATA transcription factor 3-like (LOC106353210), transcript variant X2, mRNA	Q8L4M6	359
BraA01g003640.3C	78.1137	175.252	68.1644	169.9	167.643	179.749	156.154	147.416	143.346	104.703	96.3554	96.5745	133.605	137.787	130.769	276.671	264.556	218.856	199.466	185.902	173.55	203.709	210.092	201.758	127.963	103.953	98.5983	106.64	109.595	106.931	117.203	120.903	122.901	102.635	100.491	132.614	BraA01g003640.3C	protein_coding	chrA01:1791772-1793058:-	gi|923504609|ref|XP_013648593.1|	1204	5e-165	PREDICTED: 40S ribosomal protein S3a-2-like [Brassica napus]	gi|685256872|ref|XM_009112037.1|	786	0	PREDICTED: Brassica rapa 40S ribosomal protein S3a-2 (LOC103835819), mRNA	Q42262	443
BraA01g003650.3C	40.5176	34.1566	41.7606	39.7212	44.3603	39.1246	32.3065	36.8049	35.4213	38.8405	38.3342	39.1348	38.0205	38.7188	36.3724	38.2211	39.4817	39.2007	32.9223	33.8556	33.5608	32.1775	32.8884	33.1988	31.5895	34.7321	32.4285	26.9273	29.3593	27.0457	31.42	33.407	34.2009	36.7022	30.4906	31.3103	BraA01g003650.3C	protein_coding	chrA01:1793574-1795990:+	gi|922416654|ref|XP_013601184.1|	1917	0	PREDICTED: src substrate cortactin [Brassica oleracea var. oleracea]	gi|685256874|ref|XM_009112146.1|	1110	0	PREDICTED: Brassica rapa src substrate protein p85 (LOC103835912), mRNA	Q8VWF1	699
BraA01g003660.3C	30.1866	19.1665	26.5511	41.8576	44.909	42.3353	24.0038	24.3431	23.2174	28.4725	26.9299	25.8406	22.7137	20.2383	22.041	15.2468	18.0432	17.4068	7.97949	6.02036	6.92413	9.16164	13.6881	13.9923	9.03907	7.52819	8.05394	4.74645	4.61417	4.89791	8.30557	7.55557	6.76417	8.77368	5.83298	4.81196	BraA01g003660.3C	protein_coding	chrA01:1796941-1799084:-	gi|685256877|ref|XP_009110500.1|	1837	0	PREDICTED: squalene synthase [Brassica rapa]	gi|685256876|ref|XM_009112252.1|	1088	0	PREDICTED: Brassica rapa squalene synthase (LOC103836007), mRNA	O65688	643
BraA01g003670.3C	11.4754	15.6911	12.8047	21.968	22.5284	20.9032	20.8942	15.6971	19.8879	21.4569	20.3722	21.5664	21.3692	20.7966	18.5862	28.6767	26.3097	24.1117	14.6745	14.879	12.0697	12.8468	12.7756	13.7215	12.6106	10.6783	8.18233	13.5548	13.5448	13.5361	11.0226	12.7374	10.6838	10.4309	8.03835	10.4928	BraA01g003670.3C	protein_coding	chrA01:1800556-1803939:-	gi|685256879|ref|XP_009110610.1|	2210	0	PREDICTED: squalene synthase [Brassica rapa]	gi|685256880|ref|XM_009112432.1|	1230	0	PREDICTED: Brassica rapa squalene synthase (LOC103836099), transcript variant X2, mRNA	P53799	798
BraA01g003680.3C	71.1639	113.576	72.5011	54.6825	61.0669	59.1344	63.1138	47.6439	44.1692	51.8869	50.0514	49.1783	43.4184	40.0556	43.6665	25.313	23.035	35.6952	52.0039	57.445	45.9623	33.6196	22.1798	25.8913	33.2214	31.6431	34.2807	61.3229	68.1003	67.0961	39.392	42.7756	35.6546	58.7554	38.2917	31.7248	BraA01g003680.3C	protein_coding	chrA01:1804933-1805580:+	gi|685256883|ref|XP_009110778.1|	633	6e-80	PREDICTED: uncharacterized protein LOC103836256 [Brassica rapa]	gi|685256882|ref|XM_009112530.1|	648	0	PREDICTED: Brassica rapa uncharacterized LOC103836256 (LOC103836256), mRNA	.	.
BraA01g003690.3C	18.4568	31.6023	19.6244	24.8377	22.1502	26.746	26.9626	29.7273	33.0123	23.7852	31.7957	27.069	24.6258	23.3734	25.2245	56.2557	53.0725	47.544	23.1385	18.4436	14.829	15.8567	12.0471	13.4323	9.34566	7.45988	7.4232	11.8717	14.2577	14.63	9.29551	18.9746	14.566	14.3725	6.39352	11.3212	BraA01g003690.3C	protein_coding	chrA01:1806601-1807582:+	gi|685256885|ref|XP_009110862.1|	603	1e-78	PREDICTED: 30S ribosomal protein S16, chloroplastic [Brassica rapa]	gi|685256884|ref|XM_009112614.1|	342	2e-178	PREDICTED: Brassica rapa 30S ribosomal protein S16, chloroplastic (LOC103836333), mRNA	O65686	218
BraA01g003700.3C	6.78732	19.7381	5.19602	23.6611	22.5075	22.684	29.3786	34.0997	32.5863	35.7647	33.9595	32.3519	32.8402	29.1232	37.29	120.943	121.468	80.032	15.6795	8.40645	8.32857	19.3032	25.7572	30.7116	15.7688	10.3636	10.1393	11.8896	11.3602	12.2443	10.6572	12.5599	11.4519	145.841	40.8899	37.866	BraA01g003700.3C	protein_coding	chrA01:1817021-1817485:-	gi|685256889|ref|XP_009111076.1|	615	4e-79	PREDICTED: ocs element-binding factor 1-like [Brassica rapa]	gi|685256888|ref|XM_009112828.1|	465	0	PREDICTED: Brassica rapa ocs element-binding factor 1-like (LOC103836519), mRNA	O65683	193
BraA01g003710.3C	6.60745	0.630719	6.8541	2.13156	2.01551	2.52471	0.36622	0.97159	0.728212	7.25506	7.30042	6.38163	2.66534	2.13211	2.85445	0.528988	0.878038	0.771802	10.1881	10.1797	9.04011	4.06771	3.69881	2.99844	8.81309	7.00582	7.16686	11.5921	12.1505	11.0476	4.69801	5.96443	5.52596	2.96084	2.44663	1.97705	BraA01g003710.3C	protein_coding	chrA01:1822311-1825552:-	gi|923520302|ref|XP_013666011.1|	2603	0	PREDICTED: phosphatidylinositol/phosphatidylcholine transfer protein SFH1 isoform X2 [Brassica napus]	gi|923520301|ref|XM_013810557.1|	1629	0	PREDICTED: Brassica napus phosphatidylinositol/phosphatidylcholine transfer protein SFH1 (LOC106370548), transcript variant X2, mRNA	F4JLE5	911
BraA01g003720.3C	4.71509	6.64119	4.38973	7.93701	9.95582	9.93556	7.92252	7.33172	8.07747	9.82895	10.8976	10.0484	8.80645	9.78231	11.8287	13.1202	15.3148	9.00087	9.19622	5.56568	5.23172	9.2837	8.49439	9.20754	5.11146	4.24431	4.60847	9.18993	9.02987	8.71842	6.85238	5.3694	6.49753	6.99189	6.6301	6.32015	BraA01g003720.3C	protein_coding	chrA01:1827016-1829750:+	gi|685256895|ref|XP_009111379.1|	2916	0	PREDICTED: bifunctional dihydrofolate reductase-thymidylate synthase 2 isoform X1 [Brassica rapa]	gi|685256898|ref|XM_009113284.1|	1620	0	PREDICTED: Brassica rapa bifunctional dihydrofolate reductase-thymidylate synthase 2 (LOC103836808), transcript variant X3, mRNA	Q05763	1008
BraA01g003730.3C	1.66198	0	0.28274	1.15024	1.88959	1.30184	1.48372	1.1788	0.625825	0.142786	0.597521	0.140625	0.731041	1.33711	1.49913	1.169	1.13188	0.180896	1.40465	2.66663	2.47639	9.4534	18.0129	18.932	6.5344	4.47828	4.01064	0.409409	0.641934	0.136282	2.06797	2.48969	4.61332	3.42197	3.60451	4.22341	BraA01g003730.3C	protein_coding	chrA01:1835635-1836267:-	gi|685256901|ref|XP_009111625.1|	921	9e-124	PREDICTED: uncharacterized protein LOC103837022 [Brassica rapa]	gi|685256900|ref|XM_009113377.1|	633	0	PREDICTED: Brassica rapa uncharacterized LOC103837022 (LOC103837022), mRNA	.	.
BraA01g003740.3C	9.24728	4.04073	10.6303	11.8057	12.249	10.8441	5.94567	4.29828	4.15823	8.7468	9.19917	10.0274	27.201	24.799	25.6198	17.0502	17.7928	11.3745	15.7068	8.41555	6.65719	9.6229	12.2653	12.6303	14.4884	7.98318	8.40302	6.41366	6.0754	5.65392	22.5496	25.0155	29.1575	20.9026	13.7273	19.7307	BraA01g003740.3C	protein_coding	chrA01:1843018-1847043:-	gi|685256906|ref|XP_009111901.1|	1557	0	PREDICTED: transcription factor bHLH63-like [Brassica rapa]	gi|685256905|ref|XM_009113653.1|	981	0	PREDICTED: Brassica rapa transcription factor bHLH63-like (LOC103837276), mRNA	O65679	484
BraA01g003760.3C	18.9951	7.30699	18.3117	16.3298	16.8895	17.5496	11.3842	11.1409	14.1219	20.5037	16.0223	19.6164	27.0794	28.3872	24.842	21.0117	25.32	24.2798	12.7609	11.6809	14.0875	15.6699	18.5423	20.2507	21.2385	13.8238	15.4473	8.87849	9.25562	9.82479	20.1722	23.1761	22.5857	17.0481	18.3976	21.681	BraA01g003760.3C	protein_coding	chrA01:1852728-1855387:+	gi|729313176|ref|XP_010530840.1|	1103	3e-145	PREDICTED: probable receptor-like serine/threonine-protein kinase At4g34500 [Tarenaya hassleriana]	gi|685256907|ref|XM_009113749.1|	579	0	PREDICTED: Brassica rapa probable receptor-like serine/threonine-protein kinase At4g34500 (LOC103837357), mRNA	Q6NKZ9	293
BraA01g003770.3C	21.2725	18.2304	21.4038	21.5062	20.0801	21.8781	25.3278	23.8267	23.8936	67.6078	65.0023	67.7861	32.708	33.1382	32.608	31.206	30.5456	31.55	30.4691	19.6809	18.5759	19.2567	21.7569	21.4666	22.0292	21.8486	20.3684	76.2487	78.1464	78.7417	33.9507	34.8804	35.9433	36.4219	35.4082	39.4084	BraA01g003770.3C	protein_coding	chrA01:1855992-1864107:+	gi|685256912|ref|XP_009112198.1|	2189	0	PREDICTED: glucan endo-1,3-beta-glucosidase 7 [Brassica rapa]	gi|685256911|ref|XM_009113950.1|	1462	0	PREDICTED: Brassica rapa glucan endo-1,3-beta-glucosidase 7 (LOC103837559), mRNA	O65902	773
BraA01g003780.3C	77.7739	123.599	77.5712	51.5078	54.0571	52.5397	120.091	110.134	110.652	81.4569	89.8882	79.8314	78.7571	83.0137	79.9538	69.7128	67.2884	71.0874	63.7455	71.7621	67.4086	65.3841	69.9614	77.2335	69.3856	73.7436	81.3143	101.24	100.619	97.7535	62.2521	68.7516	64.0761	89.4096	87.2723	85.5209	BraA01g003780.3C	protein_coding	chrA01:1865089-1867167:+	gi|685256914|ref|XP_009112299.1|	1922	0	PREDICTED: guanine nucleotide-binding protein subunit beta [Brassica rapa]	gi|685256913|ref|XM_009114051.1|	1134	0	PREDICTED: Brassica rapa guanine nucleotide-binding protein subunit beta (LOC103837655), mRNA	P49177	709
BraA01g003790.3C	25.5332	24.5954	26.7688	51.2884	47.834	49.4254	28.7493	32.493	33.31	53.2588	55.1853	57.6376	56.8654	54.6378	53.1029	61.2246	59.011	58.8674	42.6361	35.5564	34.4788	41.497	40.5808	45.9738	43.3468	43.038	40.9902	40.1573	40.9246	40.6856	39.7409	41.771	43.8645	34.001	38.5135	40.2214	BraA01g003790.3C	protein_coding	chrA01:1867831-1872402:-	gi|685256916|ref|XP_009112399.1|	4619	0	PREDICTED: coatomer subunit gamma [Brassica rapa]	gi|923504659|ref|XM_013794840.1|	2661	0	PREDICTED: Brassica napus coatomer subunit gamma (LOC106354772), mRNA	Q0WW26	1732
BraA01g003800.3C	0	0	0	0	0	0	0	0	0	0	0.046834	0	0	0	0	0	0	0	0.0440388	0	0	0.0463101	0	0.0494633	0	0	0	0	0	0	0	0	0	0	0.141261	0.0456597	BraA01g003800.3C	protein_coding	chrA01:1872973-1875769:-	gi|923504680|ref|XP_013650623.1|	2210	0	PREDICTED: proline-rich receptor-like protein kinase PERK5 [Brassica napus]	gi|685256917|ref|XM_009114250.1|	2019	0	PREDICTED: Brassica rapa proline-rich receptor-like protein kinase PERK5 (LOC103837835), mRNA	Q8GX23	769
BraA01g003810.3C	13.0332	12.4462	13.9415	10.6425	10.9448	10.8994	9.00996	9.80943	10.345	10.6978	10.6862	10.1868	10.4593	10.6616	9.74935	12.4869	12.0903	11.6344	10.1752	11.9088	10.6838	12.4	11.0334	12.105	9.78604	12.2957	10.0528	9.79342	12.4873	11.8405	7.56682	8.46072	8.05307	12.2369	12.8114	14.0334	BraA01g003810.3C	protein_coding	chrA01:1876452-1879979:-	gi|685256920|ref|XP_009112598.1|	4193	0	PREDICTED: SWI/SNF complex subunit SWI3D-like [Brassica rapa]	gi|685256919|ref|XM_009114350.1|	2781	0	PREDICTED: Brassica rapa SWI/SNF complex subunit SWI3D-like (LOC103837926), mRNA	Q8VY05	1181
BraA01g003820.3C	0	0.0833603	0.0869651	0.393101	0.387467	0.400421	0.414876	0.181288	0.0962457	0.0878364	0.367571	0.0865068	0.0899415	0	0.0838367	0	0	0	0	0.172674	0.358442	0.272595	0.0931163	0.291156	0.274071	0.0918287	0.0881138	0.335803	0.631828	1.08986	0.181734	0.270275	0	0	0	0	BraA01g003820.3C	protein_coding	chrA01:1880876-1882637:-	gi|685256922|ref|XP_009112704.1|	1757	0	PREDICTED: uncharacterized protein LOC103838013 isoform X1 [Brassica rapa]	gi|685256921|ref|XM_009114456.1|	1021	0	PREDICTED: Brassica rapa uncharacterized LOC103838013 (LOC103838013), transcript variant X1, mRNA	.	.
BraA01g003830.3C	5.17026	1.97949	3.44181	6.22308	4.08927	6.97287	3.50283	3.58741	2.53941	28.0421	19.3965	23.7375	2.37307	1.20569	2.4332	0	0.306188	0.587217	10.2593	9.11189	9.22091	5.51411	6.1421	3.32888	8.43647	3.39201	5.11466	12.847	16.2538	13.9354	3.83597	4.75407	3.96412	1.92258	2.1939	0.70913	BraA01g003830.3C	protein_coding	chrA01:1883686-1884075:-	gi|685256926|ref|XP_009112867.1|	540	2e-68	PREDICTED: uncharacterized protein LOC103838162 [Brassica rapa]	gi|685256925|ref|XM_009114619.1|	390	0	PREDICTED: Brassica rapa uncharacterized LOC103838162 (LOC103838162), mRNA	.	.
BraA01g003840.3C	1.18244	6.44573	2.93118	4.36455	5.18546	5.87485	8.88362	5.93063	5.34303	5.39864	5.83015	7.5466	3.38814	3.26163	2.99195	7.36652	6.21225	5.51577	9.07989	8.38768	7.81735	7.74663	8.67704	6.73473	7.06406	3.45924	5.24099	5.32626	6.42008	6.9811	3.06268	5.00139	4.30274	6.90252	4.57943	3.73011	BraA01g003840.3C	protein_coding	chrA01:1888518-1889589:+	gi|685256928|ref|XP_009112968.1|	886	1e-119	PREDICTED: EKC/KEOPS complex subunit Tprkb [Brassica rapa]	gi|685256927|ref|XM_009114720.1|	519	0	PREDICTED: Brassica rapa EKC/KEOPS complex subunit Tprkb (LOC103838263), mRNA	F1QZ15	100
BraA01g003850.3C	163.228	688.831	163.663	31.0681	27.2877	30.9156	212.101	213.972	215.27	600.381	629.067	612.052	155.188	166.871	155.916	87.2218	85.0573	34.686	202.396	106.857	110.207	40.5285	51.248	54.0468	185.034	129.821	138.244	436.635	441.468	439.314	203.832	200.331	216.41	307.694	242.673	252.375	BraA01g003850.3C	protein_coding	chrA01:1889916-1890704:-	gi|674958038|emb|CDX75430.1|	1113	3e-151	BnaA01g02720D [Brassica napus]	gi|199580220|gb|AC189529.2|	789	0	Brassica rapa subsp. pekinensis clone KBrB092P05, complete sequence	Q9SZ06	263
BraA01g003860.3C	55.4745	96.1971	56.119	31.7659	30.9728	32.1246	85.6227	77.4638	78.0545	69.575	73.5894	71.4136	34.9022	38.7863	36.0668	41.2841	40.1417	22.6427	73.0906	60.7331	61.9937	36.053	43.5776	45.2784	41.4265	36.035	42.3891	95.6583	90.7961	83.8296	37.6385	33.7821	36.6364	97.6678	92.6519	85.6766	BraA01g003860.3C	protein_coding	chrA01:1893838-1896162:-	gi|674890347|emb|CDY42403.1|	637	4e-81	BnaA08g00110D [Brassica napus]	gi|685256931|ref|XR_627130.1|	366	0	PREDICTED: Brassica rapa uncharacterized LOC103838440 (LOC103838440), transcript variant X1, ncRNA	C6KIE6	119
BraA01g003870.3C	36.4501	69.3705	36.3463	18.2907	18.4674	19.3898	37.7196	40.7951	38.9172	49.3692	48.4708	49.7618	26.4798	27.6599	24.6135	15.151	16.6768	16.5415	46.1472	48.2777	43.3556	28.9966	27.9897	25.6559	37.6928	40.6477	45.7881	89.2199	88.0006	90.4089	26.2658	28.9353	27.908	38.5721	42.2655	36.2255	BraA01g003870.3C	protein_coding	chrA01:1899795-1902682:-	gi|685256934|ref|XP_009113249.1|	4164	0	PREDICTED: extra-large guanine nucleotide-binding protein 2 [Brassica rapa]	gi|685256933|ref|XM_009115001.1|	2499	0	PREDICTED: Brassica rapa extra-large guanine nucleotide-binding protein 2 (LOC103838526), mRNA	C6KIE6	1186
BraA01g003880.3C	2.43527	0.476543	1.24288	0.280903	0.484536	0.400588	2.19383	1.94318	1.78817	4.70748	5.18754	5.00712	1.28541	1.50208	1.91707	0.513874	0.414629	0.556633	2.84032	3.94849	3.52188	2.53229	1.92964	2.1499	6.13652	6.75879	5.41496	11.1581	10.5537	10.963	5.45428	5.15024	5.60666	6.76909	6.80007	8.38645	BraA01g003880.3C	protein_coding	chrA01:1904494-1905933:-	gi|685256936|ref|XP_009113342.1|	2530	0	PREDICTED: guanine nucleotide-binding protein subunit beta-like protein [Brassica rapa]	gi|685256935|ref|XM_009115094.1|	1440	0	PREDICTED: Brassica rapa guanine nucleotide-binding protein subunit beta-like protein (LOC103838614), mRNA	O48716	452
BraA01g003890.3C	18.5113	18.8846	21.616	16.0798	16.7249	17.3073	14.9033	13.1296	13.7179	16.7434	15.0142	15.7882	14.7996	15.9916	13.7465	15.3468	16.0024	18.053	17.5225	22.5104	24.4541	21.0586	18.5591	17.5441	19.1612	23.1441	20.6252	22.1314	23.0628	22.0524	18.7425	19.2612	20.5535	21.4378	21.2513	21.23	BraA01g003890.3C	protein_coding	chrA01:1907500-1910257:-	gi|685256938|ref|XP_009113444.1|	3066	0	PREDICTED: probable E3 ubiquitin-protein ligase ARI1 isoform X1 [Brassica rapa]	gi|685256937|ref|XM_009115196.1|	1776	0	PREDICTED: Brassica rapa probable E3 ubiquitin-protein ligase ARI1 (LOC103838710), transcript variant X1, mRNA	Q949V6	1039
BraA01g003900.3C	1.8818	4.33221	2.14679	7.04811	6.29268	4.266	5.82147	3.41529	4.75177	2.96714	4.17869	3.70898	5.72593	5.22464	4.90159	10.7446	9.19723	10.4098	6.5114	7.06689	6.98554	8.2639	10.0414	10.3397	6.05344	7.75501	6.52542	5.56269	7.28547	5.44612	4.01397	3.97973	3.68716	4.94401	5.52168	7.79864	BraA01g003900.3C	protein_coding	chrA01:1912633-1914351:-	gi|685256942|ref|XP_009113576.1|	1417	0	PREDICTED: endothelin-converting enzyme 2 [Brassica rapa]	gi|685256941|ref|XM_009115328.1|	792	0	PREDICTED: Brassica rapa endothelin-converting enzyme 2 (LOC103838850), mRNA	P0DPD7	151
BraA01g003910.3C	11.6767	12.2275	12.112	4.4265	5.59735	3.97498	45.3647	39.4848	42.2101	17.5041	20.8994	19.0336	29.7838	30.9416	29.936	4.43952	3.86868	10.7995	16.0033	10.8093	10.4889	6.39489	5.5186	6.47082	12.656	15.7146	14.9483	16.17	16.441	15.4025	31.8405	28.2318	28.8771	71.6758	77.0681	78.7803	BraA01g003910.3C	protein_coding	chrA01:1915218-1917484:+	gi|685256944|ref|XP_009113671.1|	2426	0	PREDICTED: 4-hydroxy-3-methylbut-2-enyl diphosphate reductase, chloroplastic [Brassica rapa]	gi|685256943|ref|XM_009115423.1|	1389	0	PREDICTED: Brassica rapa 4-hydroxy-3-methylbut-2-enyl diphosphate reductase, chloroplastic (LOC103838937), mRNA	Q94B35	867
BraA01g003920.3C	8.42167	15.4087	8.42434	10.1805	11.2028	10.9242	11.9747	13.6191	11.7018	5.73037	7.26669	5.64364	8.62375	7.13683	9.11573	13.7428	10.4386	12.6497	12.7265	14.9348	16.564	14.9097	15.095	15.1574	12.7328	10.5293	8.9711	7.30251	7.72874	6.79525	9.7903	9.26153	8.08564	14.0854	12.3288	11.3352	BraA01g003920.3C	protein_coding	chrA01:1918440-1919480:+	gi|923504710|ref|XP_013651223.1|	1637	0	PREDICTED: transcription initiation factor TFIID subunit 8-like [Brassica napus]	gi|199580006|gb|AC189325.2|	1041	0	Brassica rapa subsp. pekinensis clone KBrB036M17, complete sequence	Q9SYZ9	390
BraA01g003930.3C	8.84164	2.87576	8.21343	3.84603	4.95778	4.12147	4.95067	3.48587	2.66711	3.89949	3.81973	3.816	4.04381	3.59221	3.81675	2.3046	2.85489	3.3984	6.71928	8.54474	9.98362	6.47486	6.29299	5.571	6.07076	7.37446	7.92326	6.19582	5.40452	6.2347	6.24374	5.4517	6.34905	8.74557	8.85638	7.16925	BraA01g003930.3C	protein_coding	chrA01:1919922-1924766:-	gi|685256952|ref|XP_009114053.1|	5453	0	PREDICTED: uncharacterized protein LOC103839266 isoform X1 [Brassica rapa]	gi|685256951|ref|XM_009115805.1|	3639	0	PREDICTED: Brassica rapa uncharacterized LOC103839266 (LOC103839266), transcript variant X1, mRNA	Q2TBM9	186
BraA01g003940.3C	13.0348	19.7474	13.9488	15.9084	20.3176	22.1332	20.0657	17.4467	18.7624	17.5565	12.6984	14.9427	29.0744	21.6503	25.4459	45.5462	53.5498	34.3247	29.2117	19.6004	22.7759	22.8705	28.0327	28.499	19.8383	13.5959	13.6982	18.6443	22.8021	19.8599	15.0231	18.0073	18.1253	16.1829	17.7827	20.1175	BraA01g003940.3C	protein_coding	chrA01:1925220-1926046:-	gi|685256948|ref|XP_009113880.1|	637	6e-83	PREDICTED: protein TRI1 [Brassica rapa]	gi|685256949|ref|XM_009115700.1|	417	0	PREDICTED: Brassica rapa protein TRI1 (LOC103839109), transcript variant X2, mRNA	Q05024	69.3
BraA01g003950.3C	33.7942	23.6997	33.3383	14.7812	16.9236	16.8192	17.959	18.8291	18.2274	14.6612	14.2427	14.7169	10.4345	11.6507	11.7638	9.94772	10.0575	11.8385	17.2361	18.5679	20.217	13.75	14.2615	12.194	12.3163	14.4012	13.2933	14.9365	15.0659	15.6079	10.3752	10.8651	10.6405	19.4172	20.5051	16.9667	BraA01g003950.3C	protein_coding	chrA01:1928015-1931928:-	gi|685256959|ref|XP_009114298.1|	3928	0	PREDICTED: uncharacterized protein LOC103839449 isoform X2 [Brassica rapa]	gi|685256958|ref|XM_009116050.1|	2244	0	PREDICTED: Brassica rapa uncharacterized LOC103839449 (LOC103839449), transcript variant X2, mRNA	Q92466	63.5
BraA01g003960.3C	36.2866	71.1427	35.3424	54.189	59.3647	53.7661	46.2652	52.604	57.5759	42.6931	48.3992	47.5312	56.4364	59.2786	55.7403	76.7645	89.6071	68.1979	69.2492	60.6308	61.4728	68.3895	77.6524	90.4004	65.6411	53.4408	62.3081	62.7761	52.5102	50.9694	62.1869	62.9745	62.4156	55.5412	54.368	63.2056	BraA01g003960.3C	protein_coding	chrA01:1932369-1933435:+	gi|658384726|gb|AID60141.1|	1115	3e-153	thioredoxin superfamily protein [Brassica napus]	gi|685256960|ref|XM_009116140.1|	627	0	PREDICTED: Brassica rapa thioredoxin domain-containing protein 9 homolog (LOC103839610), mRNA	O64628	390
BraA01g003970.3C	21.7846	33.7912	21.5854	30.9872	32.9837	34.5609	29.4954	29.6211	31.2116	21.9112	19.5992	20.7163	25.6896	22.6844	25.4098	37.3727	38.5017	44.2762	28.7759	27.4599	27.4951	33.5467	34.3779	36.6782	26.6636	25.1978	25.6071	22.4078	21.0807	21.1222	30.4873	28.4293	30.6078	29.6893	26.1584	26.3711	BraA01g003970.3C	protein_coding	chrA01:1934228-1935855:+	gi|685256963|ref|XP_009114462.1|	1307	6e-180	PREDICTED: TIP41-like protein [Brassica rapa]	gi|685256962|ref|XM_009116214.1|	736	0	PREDICTED: Brassica rapa TIP41-like protein (LOC103839702), mRNA	Q8VXY4	454
BraA01g003980.3C	41.6209	51.1201	40.6759	65.1014	67.7931	70.1983	56.346	56.2148	68.0253	51.4304	46.8013	53.9488	74.4761	61.4291	81.3301	112.118	122.228	108.724	74.8437	79.8671	68.6135	63.9075	76.7824	74.9838	60.1387	55.9951	51.5928	63.1166	70.5972	71.1626	62.0198	61.1786	63.3325	61.1515	47.6945	64.5619	BraA01g003980.3C	protein_coding	chrA01:1937035-1937513:-	gi|685256965|ref|XP_009114552.1|	285	6e-31	PREDICTED: uncharacterized protein LOC103839786 isoform X1 [Brassica rapa]	gi|685256964|ref|XM_009116304.1|	297	2e-153	PREDICTED: Brassica rapa uncharacterized LOC103839786 (LOC103839786), transcript variant X1, mRNA	.	.
BraA01g003990.3C	14.3847	30.9155	15.8589	43.0436	44.3004	40.7931	21.6599	24.0704	23.7042	83.4726	77.0471	75.7217	77.991	71.5345	81.8704	60.8053	61.062	54.3579	61.5779	34.0716	32.2787	40.4385	51.2091	50.0326	38.2614	25.6268	26.0344	52.6362	51.8813	50.743	29.0076	27.1357	29.6217	26.4103	25.8969	25.3321	BraA01g003990.3C	protein_coding	chrA01:1942125-1946165:-	gi|685256970|ref|XP_009114732.1|	4322	0	PREDICTED: alpha-L-fucosidase 2 [Brassica rapa]	gi|685256969|ref|XM_009116484.1|	2511	0	PREDICTED: Brassica rapa alpha-L-fucosidase 2 (LOC103839946), transcript variant X2, mRNA	Q8L7W8	1492
BraA01g004000.3C	0.444701	1.181	0.842994	0.468986	0.433374	0.298575	0.98993	1.14901	1.07649	0.654954	1.23336	0.516032	0.603586	0.613327	0.187539	0.268108	0.0865313	0.248929	1.28861	0.579397	1.06909	1.42283	0.138865	0.144734	0.817446	0.684723	0.722724	1.18936	1.59004	1.43777	0.609795	0.537416	0.746863	0.422596	0.344453	0.334011	BraA01g004000.3C	protein_coding	chrA01:1949829-1951208:-	gi|685256972|ref|XP_009114823.1|	2389	0	PREDICTED: 3-ketoacyl-CoA synthase 16 [Brassica rapa]	gi|685256971|ref|XM_009116575.1|	1380	0	PREDICTED: Brassica rapa 3-ketoacyl-CoA synthase 16 (LOC103840069), mRNA	Q9SYZ0	790
BraA01g004010.3C	0	0	0	0	0	0	0	0	0	0	0	0	0	0	0.346458	0	0	0	0	0	0	0	0	0	0	0	0	0	0	0	0	0	0	0	0	0	BraA01g004010.3C	protein_coding	chrA01:1952336-1952914:-	gi|674873174|emb|CDY60722.1|	344	4e-40	BnaAnng17130D [Brassica napus]	gi|923705381|ref|XR_001273545.1|	193	1e-95	PREDICTED: Brassica napus uncharacterized LOC106365889 (LOC106365889), transcript variant X3, ncRNA	Q8GWJ6	90.5
BraA01g004020.3C	7.53331	5.24362	7.84431	6.2518	5.46091	6.51079	7.73062	7.15413	8.79566	27.0525	28.6291	27.6184	7.4723	6.61667	6.91537	9.0328	12.7402	7.5942	13.8448	5.1747	5.79631	5.76961	8.3439	8.92692	7.91518	7.02966	7.5819	17.1376	17.5754	18.109	7.17171	7.164	7.28127	10.9545	11.3491	8.39996	BraA01g004020.3C	protein_coding	chrA01:1955798-1958640:-	gi|685256976|ref|XP_009115014.1|	2896	0	PREDICTED: aldehyde dehydrogenase family 3 member I1, chloroplastic isoform X1 [Brassica rapa]	gi|685256977|ref|XM_009116829.1|	1253	0	PREDICTED: Brassica rapa aldehyde dehydrogenase family 3 member I1, chloroplastic (LOC103840237), transcript variant X2, mRNA	Q8W033	946
BraA01g004030.3C	46.0388	26.516	41.5773	56.0425	53.0863	52.6359	88.6409	94.9228	97.377	36.8604	38.2105	31.0808	53.0826	58.1424	57.6726	13.0909	13.787	25.5882	12.5838	12.4907	12.8784	15.1481	13.3822	12.646	23.0202	26.5703	28.3657	4.98686	4.54016	5.54226	13.9295	13.2928	15.5944	7.98987	12.0385	11.0727	BraA01g004030.3C	protein_coding	chrA01:1959916-1961726:+	gi|685256980|ref|XP_009115174.1|	1588	0	PREDICTED: cinnamyl alcohol dehydrogenase 5 [Brassica rapa]	gi|685256979|ref|XM_009116926.1|	1074	0	PREDICTED: Brassica rapa cinnamyl alcohol dehydrogenase 5 (LOC103840386), mRNA	O49482	568
BraA01g004040.3C	60.9928	51.3717	62.1335	66.9132	69.6215	67.9314	162.142	148.488	153.966	66.3813	56.63	64.0222	78.3409	90.0112	86.2679	99.9602	104.053	84.0987	52.1434	52.8376	55.9887	99.4489	89.7205	98.0707	77.3634	84.2976	78.8808	45.881	53.0552	46.4145	96.347	96.2945	92.5418	89.5343	95.2004	99.8373	BraA01g004040.3C	protein_coding	chrA01:1964213-1966977:+	gi|685256982|ref|XP_009115272.1|	1245	5e-172	PREDICTED: agamous-like MADS-box protein AGL16 [Brassica rapa]	gi|685256981|ref|XM_009117024.1|	723	0	PREDICTED: Brassica rapa agamous-like MADS-box protein AGL16 (LOC103840485), mRNA	A2RVQ5	415
BraA01g004050.3C	7.11726	4.15054	6.30258	25.3574	21.7572	26.6271	13.0367	11.1827	11.927	14.1893	12.7602	12.6823	19.5549	19.7694	20.9177	40.9773	38.1994	24.7484	8.26999	4.91969	4.51131	17.946	20.6573	22.3894	24.7146	22.5053	16.8176	6.92012	6.55394	7.65267	31.1673	32.9449	34.2172	42.8653	39.3565	33.108	BraA01g004050.3C	protein_coding	chrA01:1969446-1971848:+	gi|685256984|ref|XP_009115347.1|	2123	0	PREDICTED: receptor protein kinase-like protein At4g34220 [Brassica rapa]	gi|685256983|ref|XM_009117099.1|	1302	0	PREDICTED: Brassica rapa receptor protein kinase-like protein At4g34220 (LOC103840574), mRNA	Q94C77	662
BraA01g004060.3C	13.394	5.95679	13.5586	40.2458	38.2595	37.5616	22.4234	16.9587	14.0052	21.6829	20.4159	21.9167	36.459	33.7227	37.5788	26.3166	23.2192	20.9641	30.873	35.4466	32.5992	52.8889	46.8195	46.5286	57.4483	54.5237	51.2875	22.4689	23.6008	24.6164	64.1055	64.9633	60.9467	36.7119	35.6509	38.7604	BraA01g004060.3C	protein_coding	chrA01:1972650-1973514:+	gi|685256986|ref|XP_009115453.1|	1407	0	PREDICTED: probable carbohydrate esterase At4g34215 [Brassica rapa]	gi|685256985|ref|XM_009117205.1|	792	0	PREDICTED: Brassica rapa probable carbohydrate esterase At4g34215 (LOC103840660), mRNA	Q8L9J9	450
BraA01g004070.3C	55.2157	18.5828	52.2133	193.419	193.119	197.62	119.086	87.3878	86.9268	71.7114	69.6908	69.9301	229.592	226.104	227.88	261.671	267.23	177.163	37.482	55.4078	54.1619	113.338	107.426	113.249	182.029	223.172	219.205	35.4513	35.7565	36.3658	138.138	146.277	147.561	184.347	135.252	132.593	BraA01g004070.3C	protein_coding	chrA01:1976165-1978736:+	gi|923504758|ref|XP_013652586.1|	2836	0	PREDICTED: D-3-phosphoglycerate dehydrogenase 1, chloroplastic [Brassica napus]	gi|685256987|ref|XM_009117307.1|	1782	0	PREDICTED: Brassica rapa D-3-phosphoglycerate dehydrogenase 2, chloroplastic (LOC103840754), mRNA	O49485	1044
BraA01g004080.3C	62.7904	118.427	60.2627	43.7298	44.4501	41.3889	33.8449	34.6621	35.2428	9.36407	9.58356	12.6306	11.4645	15.2503	17.2924	48.8875	41.4181	27.0794	41.0528	63.2291	57.1115	37.4843	37.5498	37.7873	38.7459	21.7076	26.1388	24.9039	28.1879	24.481	21.2696	23.8025	25.5346	21.3909	25.6943	32.39	BraA01g004080.3C	protein_coding	chrA01:1980357-1981124:+	gi|685256990|ref|XP_009115646.1|	468	4e-57	PREDICTED: stress enhanced protein 1, chloroplastic [Brassica rapa]	gi|685256989|ref|XM_009117398.1|	444	0	PREDICTED: Brassica rapa stress enhanced protein 1, chloroplastic (LOC103840854), mRNA	Q9M7I9	156
BraA01g004090.3C	34.2617	29.3937	35.1005	47.8891	46.9737	49.0178	27.9698	28.0086	28.032	72.0082	71.4618	69.959	57.3782	58.8448	63.0896	58.2981	56.7041	56.1843	42.2854	37.4638	35.9033	31.704	26.8452	23.173	43.3564	38.557	41.1658	48.7779	41.8021	44.5586	42.5863	40.1586	44.0553	27.9502	24.2453	30.2654	BraA01g004090.3C	protein_coding	chrA01:1981686-1984923:-	gi|685256992|ref|XP_009115735.1|	2298	0	PREDICTED: V-type proton ATPase subunit H-like [Brassica rapa]	gi|923814277|ref|XM_013836402.1|	843	0	PREDICTED: Brassica napus V-type proton ATPase subunit H-like (LOC106396104), mRNA	Q9LX65	812
BraA01g004110.3C	0	0.439886	1.37672	1.24462	0	0.422598	2.62712	2.86993	3.55517	0.463506	0.969823	0	0	0.964549	0	0.63246	0.612375	0.587217	0.455971	0.455594	0.945735	0.958975	2.45684	2.56068	1.44625	0.969146	2.32485	2.65801	4.5844	4.42392	3.83597	0.950814	1.76183	0.42724	4.87533	2.36377	BraA01g004110.3C	protein_coding	chrA01:1989783-1990242:-	gi|674921415|emb|CDY11744.1|	173	5e-14	BnaC03g58340D [Brassica napus]	gi|199580006|gb|AC189325.2|	110	1e-49	Brassica rapa subsp. pekinensis clone KBrB036M17, complete sequence	.	.
BraA01g004130.3C	2.89106	4.43414	2.87124	10.5271	9.68332	9.98869	5.63122	7.06611	5.73743	3.78612	2.61256	3.72881	9.89837	9.38759	8.6883	19.7855	17.6672	16.4311	3.32834	2.0587	2.05457	3.66667	4.3553	4.89541	3.51895	2.27387	2.98998	6.85231	8.40213	6.22779	1.4167	2.14823	2.52615	2.82161	3.64346	4.84762	BraA01g004130.3C	protein_coding	chrA01:2002141-2003508:-	gi|685257006|ref|XP_009116335.1|	1612	0	PREDICTED: cyclin-D3-1 [Brassica rapa]	gi|923504764|ref|XM_013797433.1|	1098	0	PREDICTED: Brassica napus cyclin-D3-1-like (LOC106357709), mRNA	P42753	529
BraA01g004140.3C	18.3701	35.5123	16.7987	13.2166	12.744	14.2571	16.4612	18.0772	17.3352	32.65	30.4638	28.5879	18.9701	16.8906	17.7263	25.7797	23.9311	24.9813	32.6606	23.123	21.2862	13.5198	10.6949	12.059	15.4531	17.8341	18.9986	89.9354	92.5665	91.1247	17.9793	18.1082	19.4787	31.4903	29.6638	25.6776	BraA01g004140.3C	protein_coding	chrA01:2004402-2009622:-	gi|674964568|emb|CDX69030.1|	2260	0	BnaC01g04230D [Brassica napus]	gi|685257000|ref|XM_009117878.1|	1201	0	PREDICTED: Brassica rapa uncharacterized LOC103841186 (LOC103841186), transcript variant X3, mRNA	.	.
BraA01g004150.3C	192.897	282.121	190.28	120.154	122.518	117.906	245.013	190.244	187.824	199.536	197.758	192.329	97.5256	96.5084	93.341	110.068	115.802	118.432	97.758	110.394	110.428	53.7248	58.5332	56.2419	49.2143	76.5205	75.3138	89.8106	95.0868	91.7741	65.7278	67.3477	69.4964	150.667	143.178	120.376	BraA01g004150.3C	protein_coding	chrA01:2010671-2012292:+	gi|685257008|ref|XP_009116435.1|	2554	0	PREDICTED: UDP-glycosyltransferase 73B1 [Brassica rapa]	gi|685257007|ref|XM_009118187.1|	1488	0	PREDICTED: Brassica rapa UDP-glycosyltransferase 73B1 (LOC103841605), mRNA	Q8VZE9	779
BraA01g004160.3C	4.07314	7.2114	4.35557	9.9037	7.35074	8.32575	2.95939	3.02655	3.57877	1.39975	2.02225	1.96937	4.64114	4.71605	3.43545	6.91229	7.30922	15.8756	1.57371	4.97928	5.44007	3.10288	2.47314	2.72497	1.66383	3.48421	1.87222	1.083	1.49832	1.08151	2.89608	2.18771	2.53361	25.0673	25.7303	14.4807	BraA01g004160.3C	protein_coding	chrA01:2013098-2014453:+	gi|685257010|ref|XP_009116544.1|	2417	0	PREDICTED: UDP-glycosyltransferase 73B3-like [Brassica rapa]	gi|685257009|ref|XM_009118296.1|	1356	0	PREDICTED: Brassica rapa UDP-glycosyltransferase 73B3-like (LOC103841708), mRNA	Q8W491	747
BraA01g004170.3C	0.501542	2.71531	0.443681	1.11076	0.79832	0.59715	1.00947	0.960474	0.717658	0.379184	0.577011	0.814787	0.388271	0.394538	0.756736	3.38663	3.32462	6.72545	0	0	0	0	0	0	0	0	0	0	0	0	0	0	0	0	0	0	BraA01g004170.3C	protein_coding	chrA01:2014946-2017780:-	gi|685258255|ref|XP_009129947.1|	3838	0	PREDICTED: uncharacterized protein LOC103854734 [Brassica rapa]	gi|199580006|gb|AC189325.2|	2118	0	Brassica rapa subsp. pekinensis clone KBrB036M17, complete sequence	.	.
BraA01g004180.3C	0	0	0	0.0561806	0.138439	0.0572269	0.118585	0.0647727	0.0687756	1.00426	0.196995	0.556347	0.128541	0	0	0	0.0829258	0	0	0	0	0.0649306	0	0.138703	0.195847	0.393716	0.503717	1.1998	1.63666	1.13824	0.0649319	0	0.178936	0.404988	0.660201	0.384112	BraA01g004180.3C	protein_coding	chrA01:2022292-2024021:+	gi|685257020|ref|XP_009117049.1|	2434	0	PREDICTED: UDP-glycosyltransferase 73B3-like [Brassica rapa]	gi|685257019|ref|XM_009118801.1|	1440	0	PREDICTED: Brassica rapa UDP-glycosyltransferase 73B3-like (LOC103842148), mRNA	Q8W491	724
BraA01g004190.3C	198.792	193.92	205.953	89.0416	88.7137	90.3849	112.936	125.076	121.704	108.959	107.687	108.406	159.987	158.576	162.902	159.203	163.223	220.797	69.659	70.356	71.9662	53.5194	49.5968	46.2651	78.7977	80.8898	82.4684	108.945	108.462	108.392	59.873	57.6696	56.9313	161.989	95.3111	82.3615	BraA01g004190.3C	protein_coding	chrA01:2024265-2029848:-	gi|685257022|ref|XP_009117148.1|	2737	0	PREDICTED: polyadenylate-binding protein 2 [Brassica rapa]	gi|685257021|ref|XM_009118900.1|	1762	0	PREDICTED: Brassica rapa polyadenylate-binding protein 2 (LOC103842244), mRNA	P42731	905
BraA01g004200.3C	71.928	29.8268	71.9437	48.8165	49.1508	47.6753	33.2978	35.5924	37.5841	61.0144	58.7868	59.2103	63.2812	61.6245	62.7615	34.936	34.8289	35.9723	22.3352	20.4792	20.2053	17.5453	14.8493	14.2196	28.4611	37.6438	37.0449	27.5781	28.5513	26.9712	18.3024	19.3968	21.4723	51.3207	31.4332	26.6944	BraA01g004200.3C	protein_coding	chrA01:2031448-2035586:-	gi|685257024|ref|XP_009117224.1|	5391	0	PREDICTED: probable E3 ubiquitin ligase SUD1 isoform X1 [Brassica rapa]	gi|685257023|ref|XM_009118976.1|	3336	0	PREDICTED: Brassica rapa probable E3 ubiquitin ligase SUD1 (LOC103842338), transcript variant X1, mRNA	F4JKK0	1913
BraA01g004210.3C	2.40227	2.84118	1.85926	2.21677	2.04094	2.05955	1.90251	1.85366	1.67	5.76975	4.47021	5.89684	2.39665	2.54861	2.75351	6.27604	5.75312	4.06861	2.83798	1.68533	1.66593	2.08341	1.70225	1.83434	1.78332	1.70717	1.44699	3.5116	3.67068	3.50677	1.46405	1.7307	2.01727	1.75605	1.80348	2.05415	BraA01g004210.3C	protein_coding	chrA01:2036341-2042403:-	gi|658384705|gb|AID60120.1|	5301	0	demeter-like protein 3 [Brassica napus]	gi|685257027|ref|XM_009119136.1|	1384	0	PREDICTED: Brassica rapa DEMETER-like protein 3 (LOC103842475), mRNA	O49498	1222
BraA01g004220.3C	2.15529	2.91508	1.42351	1.40391	1.2973	1.43005	1.79036	1.21396	1.21737	2.09131	1.4358	1.99529	2.47602	1.49599	1.62181	4.10207	3.45374	5.63015	4.17891	3.91851	4.13374	2.16341	2.84055	3.10503	1.22351	1.22983	1.11451	6.87085	5.87627	5.55149	1.6902	1.60875	1.36628	2.95176	2.95587	2.66629	BraA01g004220.3C	protein_coding	chrA01:2047468-2049471:+	gi|685257030|ref|XP_009117488.1|	2230	0	PREDICTED: protein DJ-1 homolog C [Brassica rapa]	gi|685257029|ref|XM_009119240.1|	1383	0	PREDICTED: Brassica rapa protein DJ-1 homolog C (LOC103842567), mRNA	Q8VY09	689
BraA01g004230.3C	54.395	54.131	51.1839	43.208	49.4604	47.0717	41.7852	44.9405	41.0403	46.4928	45.5596	46.3285	73.549	70.3902	73.197	55.4984	55.5452	84.319	48.2293	36.7478	35.2071	33.9292	40.6495	39.4926	35.9645	27.059	28.0937	24.345	24.9963	21.9587	52.9136	55.6928	51.6637	49.6084	53.3682	48.6775	BraA01g004230.3C	protein_coding	chrA01:2049904-2051879:-	gi|685257032|ref|XP_009117601.1|	1370	0	PREDICTED: ABSCISIC ACID-INSENSITIVE 5-like protein 6 [Brassica rapa]	gi|685257035|ref|XM_009119482.1|	1232	0	PREDICTED: Brassica rapa ABSCISIC ACID-INSENSITIVE 5-like protein 6 (LOC103842661), transcript variant X3, mRNA	Q9M7Q3	406
BraA01g004240.3C	7.45191	7.57704	8.50127	2.8315	2.82415	1.51079	15.0841	2.02091	2.80604	3.46471	3.62471	3.56062	0.771248	1.25391	2.73182	5.13874	6.16968	2.86268	56.4606	99.3538	105.118	35.9975	43.2772	44.4405	52.6435	40.6315	37.4765	47.9439	44.427	50.1783	12.6228	10.352	11.7382	96.0863	97.4457	111.085	BraA01g004240.3C	protein_coding	chrA01:2055605-2057082:+	gi|685257038|ref|XP_009117836.1|	961	4e-130	PREDICTED: uncharacterized protein LOC103842877 isoform X1 [Brassica rapa]	gi|685257037|ref|XM_009119588.1|	600	0	PREDICTED: Brassica rapa uncharacterized LOC103842877 (LOC103842877), transcript variant X1, mRNA	.	.
BraA01g004250.3C	0	0.0411404	0.0429195	0	0	0	0.0819007	0	0	0	0.0453514	0	0	0	0	0	0	0	0	0	0	0	0	0	0	0	0.130459	0.0414318	0.0389779	0	0.134535	0	0	0	0.0455966	0.0442144	BraA01g004250.3C	protein_coding	chrA01:2058063-2060147:+	gi|923504900|ref|XP_013657315.1|	2273	0	PREDICTED: pollen-specific leucine-rich repeat extensin-like protein 4 [Brassica napus]	gi|199580073|gb|AC189386.2|	2085	0	Brassica rapa subsp. pekinensis clone KBrB052L10, complete sequence	O81765	737
BraA01g004260.3C	0	2.16611	0.451955	1.63435	1.51024	4.99435	0.43122	2.35537	4.00149	4.56483	4.29808	3.59659	2.33712	0.474967	4.79266	0	0	4.62656	7.63406	3.14084	3.72562	5.66667	6.29099	6.55688	4.74779	2.38616	3.6634	5.23547	4.51494	3.9212	2.36116	4.68204	2.6027	0.420767	0	0.465591	BraA01g004260.3C	protein_coding	chrA01:2064362-2064559:-	gi|685257046|ref|XP_009118175.1|	277	1e-30	PREDICTED: uncharacterized protein LOC103843199 [Brassica rapa]	gi|923520410|ref|XM_013810881.1|	198	1e-98	PREDICTED: Brassica napus uncharacterized LOC106370884 (LOC106370884), mRNA	.	.
BraA01g004270.3C	1.61009	2.20549	1.31478	3.78871	4.3019	3.10255	3.99858	2.48385	3.09206	2.90489	1.99709	3.84181	1.61473	2.15894	2.45575	4.07702	2.96066	3.25962	3.4292	1.87635	1.94748	1.4596	2.63958	2.0175	1.89912	1.90892	2.16473	1.18988	1.71642	1.34668	2.66167	2.72409	1.65627	1.91258	1.48409	1.4391	BraA01g004270.3C	protein_coding	chrA01:2067805-2069894:-	gi|685257048|ref|XP_009118282.1|	1793	0	PREDICTED: serine/threonine-protein kinase SRK2E [Brassica rapa]	gi|923520316|ref|XM_013810609.1|	1089	0	PREDICTED: Brassica napus serine/threonine-protein kinase SRK2E (LOC106370611), mRNA	Q940H6	679
BraA01g004280.3C	5.13814	7.60374	5.5069	11.735	10.5153	10.0216	9.75789	7.24315	8.63398	11.6539	11.5686	12.6513	14.9843	15.5706	16.8744	18.7931	19.8585	16.6937	11.7901	9.30714	9.32224	13.6311	16.0747	13.7545	16.1154	12.8758	11.425	15.4418	17.3255	16.3053	13.2889	12.2247	13.9688	12.8782	13.9295	14.0475	BraA01g004280.3C	protein_coding	chrA01:2071509-2073867:-	gi|685257050|ref|XP_009118392.1|	2302	0	PREDICTED: armadillo repeat-containing protein 6 [Brassica rapa]	gi|685257049|ref|XM_009120144.1|	1365	0	PREDICTED: Brassica rapa armadillo repeat-containing protein 6 (LOC103843384), mRNA	Q6NXE6	143
BraA01g004290.3C	21.8249	44.5176	23.0325	12.1748	12.3368	11.2425	27.74	29.6479	27.7192	15.5089	13.5652	18.9048	12.7565	19.0468	16.2587	16.6521	13.1002	16.4272	27.3871	24.8655	22.566	19.9888	20.6188	25.1422	14.4117	17.6757	20.0212	32.4401	34.0621	32.6381	16.57	18.5148	19.3281	44.058	41.5843	32.8035	BraA01g004290.3C	protein_coding	chrA01:2074402-2075540:-	gi|685257052|ref|XP_009118500.1|	1119	5e-153	PREDICTED: E3 ubiquitin-protein ligase RNF170 isoform X1 [Brassica rapa]	gi|923520401|ref|XM_013810854.1|	711	0	PREDICTED: Brassica napus E3 ubiquitin-protein ligase RNF170-like (LOC106370861), transcript variant X1, mRNA	Q28DS3	84
BraA01g004300.3C	91.8907	188.076	89.8185	205.696	218.733	220.819	217.248	222.991	225.767	112.645	121.174	115.885	161.105	146.464	160.235	366.792	387.43	363.031	213.394	162.546	166.489	224.573	257.818	225.069	124.297	104.291	104.605	132.617	140.415	136.429	128.305	130.816	134.878	95.6543	111.442	136.403	BraA01g004300.3C	protein_coding	chrA01:2076070-2078088:-	gi|658384695|gb|AID60110.1|	822	3e-109	suppressor of SNI1 2 [Brassica napus]	gi|923520398|ref|XM_013810842.1|	330	2e-171	PREDICTED: Brassica napus zinc finger SWIM domain-containing protein 7-like (LOC106370853), mRNA	Q680P8	108
BraA01g004310.3C	0.587823	0.0821626	0.428578	0.154981	0.477375	0.473602	0	0.0893416	0	0.865744	1.81145	2.04633	0.886492	1.89168	1.07422	0	0	0	0.340668	0.25529	0.706584	0	0.183557	0	0.720355	0.633565	0.521087	0.661957	0.778437	0.413154	2.95552	2.75271	2.05674	0.399003	0	0	BraA01g004310.3C	protein_coding	chrA01:2086626-2088213:+	gi|923673525|ref|XP_013651457.1|	1514	0	PREDICTED: transcription factor bHLH85-like [Brassica napus]	gi|923673524|ref|XM_013796003.1|	1044	0	PREDICTED: Brassica napus transcription factor bHLH85-like (LOC106356206), mRNA	Q84WK0	476
BraA01g004320.3C	0.290778	1.35139	0.445209	0.804976	0.3306	0.341653	0.424784	0.232022	0.16424	0.29978	0.156812	0.221432	0.767411	0.779797	0.286129	0.409054	0.297048	1.04443	0.88472	0.441995	0.611669	1.00788	1.2712	1.0765	0.779489	0.861865	0.826998	0.716296	0.94342	0.786842	0.775306	0.538085	0.712183	0.276325	0.47298	1.07016	BraA01g004320.3C	protein_coding	chrA01:2099020-2100512:+	gi|685257064|ref|XP_009119029.1|	2044	0	PREDICTED: putative Peroxidase 48 [Brassica rapa]	gi|685257063|ref|XM_009120781.1|	1206	0	PREDICTED: Brassica rapa putative Peroxidase 48 (LOC103843977), mRNA	O81755	533
BraA01g004330.3C	2.04748	2.18542	0.569981	1.03057	1.26976	1.39969	2.3566	2.17834	0.841077	1.72708	1.0038	0.944963	2.16146	1.19801	0.732636	0.78554	1.01413	0.972461	6.60722	3.58382	2.9366	2.38217	2.03432	1.27218	1.39712	1.20372	1.15502	2.2009	1.03527	1.83156	0.992589	0.393649	1.6412	0.353766	0.40369	0.195726	BraA01g004330.3C	protein_coding	chrA01:2102945-2103660:+	gi|685257066|ref|XP_009119124.1|	649	7e-84	PREDICTED: uncharacterized protein LOC103844069 [Brassica rapa]	gi|923520382|ref|XM_013810796.1|	445	0	PREDICTED: Brassica napus uncharacterized LOC106370818 (LOC106370818), mRNA	.	.
BraA01g004350.3C	5.03366	8.2996	5.56618	5.63419	6.04097	6.00198	4.90229	5.15702	6.63405	6.63102	8.44535	8.89682	7.28196	7.54948	7.20046	17.2439	16.1884	16.3756	8.7449	8.69045	8.28461	8.54971	9.27094	10.0344	6.94677	6.58077	4.91666	9.78207	9.93718	9.35585	8.50017	7.63911	8.08208	9.25687	9.65346	9.80191	BraA01g004350.3C	protein_coding	chrA01:2110155-2117169:+	gi|685257068|ref|XP_009119230.1|	2451	0	PREDICTED: fatty acyl-CoA reductase 3 [Brassica rapa]	gi|685257067|ref|XM_009120982.1|	1375	0	PREDICTED: Brassica rapa fatty acyl-CoA reductase 3 (LOC103844166), mRNA	Q93ZB9	773
BraA01g004360.3C	215.126	158.655	212.817	180.371	170.685	173.728	194.793	186.135	188.928	70.7488	76.6774	75.0799	82.2122	93.2164	84.5229	87.5348	86.2254	86.5099	106.51	162.211	169.415	175.57	172.082	174.612	119.637	128.15	128.069	49.9166	50.8913	50.3031	120.393	128.253	125.85	109.251	105.855	103.943	BraA01g004360.3C	protein_coding	chrA01:2121494-2123939:+	gi|674855806|emb|CDY70702.1|	1750	0	BnaAnng34680D [Brassica napus]	gi|685257071|ref|XM_009121185.1|	1123	0	PREDICTED: Brassica rapa inositol-tetrakisphosphate 1-kinase 3 (LOC103844358), mRNA	O81893	574
BraA01g004380.3C	8.15531	5.73514	8.28102	9.2894	9.27218	9.66203	7.98383	6.46221	6.86157	8.36399	8.06306	7.84924	6.18792	8.15591	8.15031	9.14218	11.3975	9.9861	9.6927	10.9329	9.11369	11.7328	11.7914	11.1769	7.60613	7.92009	8.47826	9.50071	7.48115	6.64553	7.92773	8.08468	8.82196	8.51686	7.32362	6.7443	BraA01g004380.3C	protein_coding	chrA01:2129359-2132732:+	gi|658384683|gb|AID60098.1|	3388	0	tRNA synthetase class II (D, K and N) family protein [Brassica napus]	gi|685257075|ref|XM_009121347.1|	1771	0	PREDICTED: Brassica rapa aspartate--tRNA ligase, mitochondrial (LOC103844519), mRNA	F4JJT9	1159
BraA01g004390.3C	6.55473	12.6484	5.20382	6.55266	6.93488	5.30552	6.91564	5.3271	3.39379	5.63138	8.93536	7.57972	3.17149	3.80862	2.95622	6.78762	8.68009	7.72895	14.5882	9.5022	9.19219	9.80634	8.05935	9.02219	5.17376	4.02301	4.70764	9.14985	7.34205	8.33103	3.20411	5.29464	5.70811	7.61313	4.44247	7.08394	BraA01g004390.3C	protein_coding	chrA01:2135103-2136392:-	gi|685257078|ref|XP_009119695.1|	1107	7e-147	PREDICTED: myb-like protein X [Brassica rapa]	gi|199580073|gb|AC189386.2|	766	0	Brassica rapa subsp. pekinensis clone KBrB052L10, complete sequence	.	.
BraA01g004400.3C	0.16892	0	0	0.623507	0.960269	0.31756	0.329023	1.0783	0.76329	0.870748	0.182192	0.514541	1.96156	3.62403	2.32707	0.712889	0	0	1.02791	0.684708	0.888335	1.62139	0.738472	0.384841	0.724519	0.36413	0.698798	0.499337	0.62635	0.9973	3.06268	3.03656	2.64784	0.321048	0.915886	0.177624	BraA01g004400.3C	protein_coding	chrA01:2137980-2138498:-	gi|923520379|ref|XP_013666243.1|	888	6e-120	PREDICTED: pathogenesis-related protein 1-like [Brassica napus]	gi|923520378|ref|XM_013810789.1|	519	0	PREDICTED: Brassica napus pathogenesis-related protein 1-like (LOC106370805), mRNA	P33154	166
BraA01g004410.3C	6340.6	1491.88	6361.25	1816.78	1772.52	1781.08	4927.08	5325.78	5340.63	9269.23	9403	8837.97	9284.95	10143.6	10574	87.8578	112.817	269.365	4451.31	6401.62	6762.36	5191.12	2404.91	2424.56	2521.16	3084.39	3138.7	9506.5	9032.92	9251.22	9133.26	9083.97	8493.71	404.975	417.941	318.177	BraA01g004410.3C	protein_coding	chrA01:2140451-2140975:-	gi|685257084|ref|XP_009119957.1|	937	2e-127	PREDICTED: pathogenesis-related protein 1 [Brassica rapa]	gi|685257083|ref|XM_009121709.1|	525	0	PREDICTED: Brassica rapa pathogenesis-related protein 1 (LOC103844852), mRNA	Q9ZNS4	204
BraA01g004430.3C	6.66976	13.5899	6.80804	14.5937	13.6028	15.8996	10.6476	9.29069	10.2532	8.36492	8.08376	10.1233	11.5415	11.5803	12.9909	27.1809	21.1666	17.3333	13.8776	12.8906	13.5963	16.72	17.9609	19.19	9.36377	8.96745	7.46686	8.46915	10.2622	7.71324	10.4135	11.1245	10.3741	10.2588	9.39505	11.4963	BraA01g004430.3C	protein_coding	chrA01:2145064-2147398:+	gi|685257090|ref|XP_009120274.1|	2142	0	PREDICTED: DUF21 domain-containing protein At4g33700 [Brassica rapa]	gi|685257089|ref|XM_009122026.1|	1275	0	PREDICTED: Brassica rapa DUF21 domain-containing protein At4g33700 (LOC103845161), mRNA	Q8VZI2	767
BraA01g004440.3C	12.6061	20.183	13.3353	18.8238	14.7234	20.7902	20.5362	21.9465	22.1377	10.2789	8.77595	10.5888	14.2757	9.71169	14.9982	20.6356	18.7315	12.8727	15.4583	15.4455	12.7767	16.1333	20.9168	21.2787	16.3436	16.428	14.4596	9.71129	8.07377	6.87876	13.6892	12.4818	12.3501	22.8699	24.8546	24.8242	BraA01g004440.3C	protein_coding	chrA01:2147740-2148705:-	gi|685257088|ref|XP_009120179.1|	847	5e-111	PREDICTED: protein FAM133 [Brassica rapa]	gi|685257087|ref|XM_009121931.1|	765	0	PREDICTED: Brassica rapa protein FAM133 (LOC103845070), mRNA	.	.
BraA01g004450.3C	0.509337	0.498346	0.324935	1.88003	1.73727	1.25675	0.992087	0.948306	1.22268	1.9035	1.7854	2.13327	0.672112	0.34148	1.37828	0.895641	2.42816	0.831571	2.64741	2.96782	2.47766	1.62963	1.53084	1.81311	1.43365	1.30381	1.71198	1.8193	2.1837	2.25533	0.950636	0.673234	0.873239	0.605024	0.345203	0.133895	BraA01g004450.3C	protein_coding	chrA01:2149211-2153739:+	gi|658384676|gb|AID60091.1|	2229	0	L,L-diaminopimelate aminotransferase [Brassica napus]	gi|923546701|ref|XM_013879743.1|	1285	0	PREDICTED: Brassica napus LL-diaminopimelate aminotransferase, chloroplastic-like (LOC106438544), mRNA	Q93ZN9	847
BraA01g004460.3C	14.0835	12.7461	9.70342	18.8442	12.8098	13.238	4.11477	3.3713	3.57965	0	0	1.07248	0.743372	1.13305	2.07875	0	0	0.459869	3.92794	1.78395	2.96254	2.25301	3.07845	4.0107	3.39782	1.51794	3.27719	2.77543	4.24295	4.15742	0.751019	0.372307	1.37975	0	0.381803	0	BraA01g004460.3C	protein_coding	chrA01:2153991-2154239:-	gi|685257092|ref|XP_009120372.1|	235	7e-24	PREDICTED: uncharacterized protein LOC103845257 [Brassica rapa]	gi|923546715|ref|XM_013879746.1|	249	8e-127	PREDICTED: Brassica napus uncharacterized LOC106438548 (LOC106438548), mRNA	.	.
BraA01g004470.3C	16.0583	9.37752	16.2066	14.2843	14.5978	14.5504	13.1735	10.6202	10.0916	13.4979	13.3021	12.8896	16.6849	15.7127	15.1254	15.6706	16.3553	14.2662	12.6916	14.6602	12.8195	12.7675	12.9653	14.1313	14.8533	16.9571	16.7573	13.2572	15.6905	14.3777	13.5393	14.3034	15.307	20.0718	13.6093	15.3265	BraA01g004470.3C	protein_coding	chrA01:2156617-2161451:-	gi|685257097|ref|XP_009120625.1|	3940	0	PREDICTED: dynamin-related protein 3A isoform X2 [Brassica rapa]	gi|685257096|ref|XM_009122377.1|	2424	0	PREDICTED: Brassica rapa dynamin-related protein 3A (LOC103845417), transcript variant X2, mRNA	Q8S944	1355
BraA01g004480.3C	21.0042	29.1883	25.479	30.6184	38.0707	31.7609	45.3589	20.0795	19.2572	35.1492	32.8326	39.2534	37.277	37.5521	49.1248	53.9568	54.3164	58.0489	54.6453	42.2611	50.2668	43.8282	35.9313	37.1031	42.7598	30.1849	28.0193	44.9924	38.377	34.1471	47.4003	45.3865	54.8737	44.5487	19.1458	30.4089	BraA01g004480.3C	protein_coding	chrA01:2162465-2162956:+	gi|685257099|ref|XP_009120730.1|	352	4e-41	PREDICTED: costars family protein ST45-2 [Brassica rapa]	gi|685257098|ref|XM_009122482.1|	288	2e-148	PREDICTED: Brassica rapa costars family protein ST45-2 (LOC103845581), mRNA	.	.
BraA01g004490.3C	14.3868	30.0589	17.2855	10.7867	8.34893	12.8188	15.1789	11.4797	12.3584	23.9478	26.6701	20.0856	15.8205	18.4872	17.696	24.4551	28.3734	25.6418	19.6068	22.476	20.9638	15.8231	15.8876	12.6327	17.6764	13.568	15.499	37.3598	39.1758	38.4881	16.7824	20.284	14.9756	37.3123	33.1522	31.3593	BraA01g004490.3C	protein_coding	chrA01:2163717-2164929:+	gi|674957976|emb|CDX75368.1|	916	2e-123	BnaA01g03340D [Brassica napus]	gi|685257102|ref|XM_009122695.1|	571	0	PREDICTED: Brassica rapa uncharacterized LOC103845772 (LOC103845772), mRNA	.	.
BraA01g004500.3C	11.2991	13.18	10.4439	7.87944	8.62017	8.96026	8.13669	8.18387	8.89752	9.25844	8.73329	8.29616	8.08159	8.40943	8.47468	9.57851	9.0738	8.26837	11.049	12.3452	12.9681	10.4412	9.5334	11.4876	8.28771	8.56852	8.18381	9.64672	8.52948	8.22103	7.37966	7.97833	8.43748	13.9203	12.8914	12.8489	BraA01g004500.3C	protein_coding	chrA01:2165193-2170475:-	gi|685257101|ref|XP_009120836.1|	3862	0	PREDICTED: probable ubiquitin-like-specific protease 2A [Brassica rapa]	gi|685257100|ref|XM_009122588.1|	2367	0	PREDICTED: Brassica rapa probable ubiquitin-like-specific protease 2A (LOC103845672), mRNA	Q0WKV8	1048
BraA01g004510.3C	0	0	0	0	0	0	0	0	0	0.199522	0	0	0	0	0	0.272251	0	0	0	0	0	0	0	0	0	0	0	0	0	0	0	0	0	0	0	0	BraA01g004510.3C	protein_coding	chrA01:2171222-2171674:+	gi|674957974|emb|CDX75366.1|	461	4e-53	BnaA01g03360D [Brassica napus]	gi|199580331|gb|AC189637.2|	453	0	Brassica rapa subsp. pekinensis clone KBrS004O21, complete sequence	.	.
BraA01g004520.3C	10.2019	16.1854	9.44018	12.6255	13.2793	13.5328	14.2999	9.68737	8.61658	5.84864	7.19852	5.80852	7.14631	8.43784	8.20929	11.4008	12.5972	12.8268	13.8762	19.3237	18.3014	12.304	13.5467	11.6212	7.56549	7.34765	6.11363	7.28098	7.86615	7.4586	8.74515	8.46891	10.6486	15.1764	7.85779	8.62216	BraA01g004520.3C	protein_coding	chrA01:2172111-2181737:-	gi|685257109|ref|XP_009121254.1|	1620	0	PREDICTED: uncharacterized protein LOC103846052 [Brassica rapa]	gi|685257108|ref|XM_009123006.1|	940	0	PREDICTED: Brassica rapa uncharacterized LOC103846052 (LOC103846052), mRNA	Q94CE3	458
BraA01g004530.3C	11.3892	10.0091	10.1286	14.8207	13.9957	14.7762	9.19902	10.1218	9.43759	18.0345	16.6607	16.5844	13.0671	15.2533	12.4822	15.8779	15.3737	15.6774	11.3434	14.3403	13.8439	13.0922	15.9508	16.0423	12.2124	15.1422	13.6832	16.3967	15.8365	16.7097	10.874	10.4928	11.0243	14.6468	18.3778	14.8446	BraA01g004530.3C	protein_coding	chrA01:2182758-2186255:+	gi|685257111|ref|XP_009121325.1|	3653	0	PREDICTED: potassium transporter 13 [Brassica rapa]	gi|685257110|ref|XM_009123077.1|	2571	0	PREDICTED: Brassica rapa potassium transporter 13 (LOC103846140), mRNA	Q8LPL8	1278
BraA01g004540.3C	12.5775	12.7314	13.4088	11.9788	12.6051	10.7132	11.6746	11.7623	10.2791	11.6541	12.2259	11.2255	8.16326	8.52821	8.15924	11.3587	9.81363	15.292	12.0001	11.6755	13.6534	12.2216	10.6237	11.0373	7.59243	11.983	10.6953	12.0566	11.2562	12.1623	8.51222	8.70232	8.30597	14.6083	12.3256	11.0703	BraA01g004540.3C	protein_coding	chrA01:2186849-2191360:-	gi|685257113|ref|XP_009121393.1|	4221	0	PREDICTED: copper-transporting ATPase PAA1, chloroplastic [Brassica rapa]	gi|685257112|ref|XM_009123145.1|	2823	0	PREDICTED: Brassica rapa copper-transporting ATPase PAA1, chloroplastic (LOC103846231), mRNA	Q9SZC9	1474
BraA01g004550.3C	9.47155	7.06339	9.1963	5.2228	5.58133	5.64578	5.96208	6.57456	6.58941	11.8487	11.337	12.4903	9.75492	10.5938	10.0589	13.2429	10.2264	7.84503	7.55596	7.84235	8.8686	5.11232	5.55459	4.86832	8.66989	9.02589	6.98833	10.4709	10.6003	10.5134	10.2248	10.0155	8.82656	10.2631	7.51533	9.71667	BraA01g004550.3C	protein_coding	chrA01:2192889-2195693:-	gi|685257115|ref|XP_009121487.1|	2633	0	PREDICTED: phospho-2-dehydro-3-deoxyheptonate aldolase 2, chloroplastic [Brassica rapa]	gi|685257114|ref|XM_009123239.1|	1518	0	PREDICTED: Brassica rapa phospho-2-dehydro-3-deoxyheptonate aldolase 2, chloroplastic (LOC103846297), mRNA	Q00218	940
BraA01g004560.3C	0.263951	0.110681	0.0384891	0.208774	0.257228	0.28355	0.220339	0.240704	0.212983	0.777494	0.77273	0.689152	0.199032	0.283142	0.408149	0.583496	0.770408	0.541755	0.382427	0.305689	0.158639	0.281506	0.082423	0.386579	0.242597	0.162566	0.272982	0.408705	0.908813	0.371039	0.402159	0.358855	0.110825	0.394164	0.0817797	0.118951	BraA01g004560.3C	protein_coding	chrA01:2197705-2201243:+	gi|685257117|ref|XP_009121595.1|	3394	0	PREDICTED: probable protein phosphatase 2C 62 isoform X1 [Brassica rapa]	gi|685257116|ref|XM_009123347.1|	1326	0	PREDICTED: Brassica rapa probable protein phosphatase 2C 62 (LOC103846397), transcript variant X1, mRNA	Q93V88	713
BraA01g004570.3C	2.46263	2.65044	3.184	4.69645	4.75981	4.16663	5.51622	4.19203	2.78193	4.48533	3.98418	4.83418	4.07288	4.13862	4.36186	6.23577	8.38576	4.39588	2.74735	2.6619	2.50381	3.85206	5.74182	4.02084	4.66511	3.45054	2.97136	4.28691	5.17442	4.03869	2.8891	3.21167	3.45809	7.4107	4.80686	4.83377	BraA01g004570.3C	protein_coding	chrA01:2202311-2203378:+	gi|685257123|ref|XP_009121901.1|	1879	0	PREDICTED: protein ROOT PRIMORDIUM DEFECTIVE 1 [Brassica rapa]	gi|685257122|ref|XM_009123653.1|	1068	0	PREDICTED: Brassica rapa protein ROOT PRIMORDIUM DEFECTIVE 1 (LOC103846652), mRNA	Q689D6	662
BraA01g004580.3C	6.00851	10.5552	5.43613	10.081	9.93655	9.81949	14.2303	12.785	14.8093	12.741	11.8565	9.42844	7.71248	8.12993	7.72649	28.143	27.2493	19.8872	8.72524	7.88774	7.03777	11.7967	14.5516	16.3333	10.3231	8.46305	8.19129	12.5138	13.2916	12.4294	7.79182	8.01416	10.4351	10.3815	11.5504	9.62076	BraA01g004580.3C	protein_coding	chrA01:2203800-2205492:+	gi|685257121|ref|XP_009121783.1|	2194	0	PREDICTED: aspartic proteinase Asp1 [Brassica rapa]	gi|685257120|ref|XM_009123535.1|	1284	0	PREDICTED: Brassica rapa aspartic proteinase Asp1 (LOC103846556), mRNA	Q0IU52	320
BraA01g004590.3C	10.4832	13.5247	9.37484	9.16012	8.75461	10.9004	6.59561	8.38961	7.75527	10.3296	10.8066	11.7745	9.9895	11.743	10.6808	17.6185	16.8063	17.0852	20.4174	16.17	17.4661	16.4244	13.5867	11.3076	9.64933	8.99922	9.21082	19.1967	17.0278	16.3404	13.5553	11.772	12.7243	9.874	9.859	11.0234	BraA01g004590.3C	protein_coding	chrA01:2206130-2208455:+	gi|674964519|emb|CDX68981.1|	1058	5e-141	BnaC01g04720D [Brassica napus]	gi|685257124|ref|XM_009123767.1|	800	0	PREDICTED: Brassica rapa uncharacterized LOC103846741 (LOC103846741), mRNA	.	.
BraA01g004600.3C	0	0.055198	0.057585	0	0.0641416	0	0	0	0	0.116324	0	0	0	0.0605171	0	0.0793628	0	0.0736855	1.60206	3.43015	3.26352	1.44402	1.41814	1.02823	1.02838	1.1553	0.816838	0.667068	0.679855	0.555125	0.361011	0.477242	0.663237	0.696946	0.550592	0.652546	BraA01g004600.3C	protein_coding	chrA01:2217018-2221123:+	gi|685257127|ref|XP_009122119.1|	2268	0	PREDICTED: histone deacetylase 14 [Brassica rapa]	gi|685257126|ref|XM_009123871.1|	1271	0	PREDICTED: Brassica rapa histone deacetylase 14 (LOC103846835), mRNA	Q941D6	759
BraA01g004610.3C	2.04676	2.89264	2.14723	1.469	2.00386	1.97733	2.65779	3.32685	3.14709	3.16519	2.82079	2.54	2.64085	2.74446	3.24484	4.4789	5.80804	3.93573	4.32463	5.87664	5.26226	4.85085	4.16324	5.2459	3.53591	3.49289	2.93998	3.58538	3.10951	3.07695	3.94139	4.50897	3.78759	3.29573	3.82249	3.76639	BraA01g004610.3C	protein_coding	chrA01:2222273-2225781:+	gi|685257133|ref|XP_009122458.1|	1365	0	PREDICTED: transcriptional activator Myb [Brassica rapa]	gi|685257132|ref|XM_009124210.1|	777	0	PREDICTED: Brassica rapa transcriptional activator Myb (LOC103847130), mRNA	Q8H1R4	392
BraA01g004620.3C	0.98436	0.421364	1.00477	5.16625	3.70725	4.91549	2.03717	1.44	1.59849	1.58568	2.18976	1.99895	2.14326	1.84787	2.23994	8.82781	8.96647	8.11596	2.18386	2.99254	2.52362	3.60877	3.36199	3.22376	3.16653	1.79037	2.0997	1.1518	1.53983	1.39237	4.46184	4.68401	4.64103	2.16318	2.00145	2.6524	BraA01g004620.3C	protein_coding	chrA01:2227738-2230609:-	gi|685257135|ref|XP_009122564.1|	2167	0	PREDICTED: probable polygalacturonase [Brassica rapa]	gi|685257134|ref|XM_009124316.1|	1425	0	PREDICTED: Brassica rapa probable polygalacturonase (LOC103847224), mRNA	A7PZL3	366
BraA01g004630.3C	131.481	120.58	129.952	86.2322	86.4828	83.2526	96.8211	103.804	102.14	69.7287	64.6221	70.3564	77.6998	75.8039	74.3834	66.4955	63.4161	72.1934	92.8533	103	109.695	93.3485	86.0849	81.4685	89.5371	99.0862	97.6248	76.4914	77.3613	74.3355	72.1344	73.0216	73.0824	69.224	76.3736	69.4266	BraA01g004630.3C	protein_coding	chrA01:2232071-2234939:+	gi|674957959|emb|CDX75351.1|	2786	0	BnaA01g03510D [Brassica napus]	gi|923546630|ref|XM_013879720.1|	1842	0	PREDICTED: Brassica napus BRASSINOSTEROID INSENSITIVE 1-associated receptor kinase 1-like (LOC106438526), mRNA	Q94F62	1009
BraA01g004640.3C	282.71	97.2362	291.252	296.634	299.401	306.376	657.043	685.979	670.632	203.222	188.761	198.924	276.494	282.952	287.237	78.2166	71.8566	55.7526	49.5079	43.2559	48.5796	64.668	62.2031	65.5802	101.283	100.036	95.876	71.9339	68.485	65.373	183.268	169.206	168.454	84.4559	81.6572	114.745	BraA01g004640.3C	protein_coding	chrA01:2235508-2237109:-	gi|685257139|ref|XP_009122784.1|	1262	7e-173	PREDICTED: peroxidase 47 [Brassica rapa]	gi|923599735|ref|XM_013885303.1|	430	0	PREDICTED: Brassica napus peroxidase 47-like (LOC106443747), mRNA	Q9SZB9	434
BraA01g004650.3C	5.32755	11.575	8.23697	14.9654	11.758	12.9612	15.5655	13.0032	13.1872	9.28876	8.70371	10.7391	11.9926	12.9425	11.2557	17.9649	20.4891	23.5359	4.13186	5.08116	3.46093	4.01073	3.76759	3.56984	4.36848	3.46216	2.83594	4.78632	4.72071	4.62555	4.17792	5.21928	3.76101	5.06274	4.24794	4.20155	BraA01g004650.3C	protein_coding	chrA01:2238792-2240113:-	gi|923546624|ref|XP_013735172.1|	1882	0	PREDICTED: signal peptide peptidase-like 1 [Brassica napus]	gi|923546626|ref|XM_013879719.1|	1119	0	PREDICTED: Brassica napus signal peptide peptidase-like 1 (LOC106438525), transcript variant X2, mRNA	Q93Z32	697
BraA01g004660.3C	1.41329	4.23759	2.41983	3.82835	4.09485	4.84241	7.28163	5.1414	5.66514	3.24309	3.54038	3.37916	5.00529	4.05908	4.88986	7.56782	6.39603	4.58506	4.94739	4.01932	4.79507	3.50078	4.33492	4.25847	1.6621	1.96551	1.32019	2.60549	2.91604	2.73648	2.13941	1.97654	2.67985	1.8196	1.38426	1.91757	BraA01g004660.3C	protein_coding	chrA01:2242754-2244959:+	gi|685257149|ref|XP_009123134.1|	3138	0	PREDICTED: protein CYPRO4 [Brassica rapa]	gi|685257148|ref|XM_009124886.1|	1923	0	PREDICTED: Brassica rapa protein CYPRO4 (LOC103847799), mRNA	.	.
BraA01g004670.3C	2.01192	3.42028	1.92528	3.8988	4.28898	4.11324	3.37999	4.12048	3.55124	3.81136	3.33638	3.88134	5.2036	4.50524	4.57819	9.26919	9.59142	8.73751	5.63685	4.23052	4.65542	5.39114	6.12941	6.41712	4.07199	3.09009	3.43325	5.20394	5.26872	4.75134	3.48687	3.77625	4.06533	3.84774	4.0362	4.83942	BraA01g004670.3C	protein_coding	chrA01:2245297-2250563:-	gi|674957955|emb|CDX75347.1|	4472	0	BnaA01g03550D [Brassica napus]	gi|685257146|ref|XM_009124824.1|	2268	0	PREDICTED: Brassica rapa protein WEAK CHLOROPLAST MOVEMENT UNDER BLUE LIGHT-like 1 (LOC103847656), transcript variant X2, mRNA	Q9SZB6	779
BraA01g004680.3C	3.81646	4.16086	2.44865	4.22612	3.09938	3.99734	2.86729	2.32022	3.44905	5.62087	5.88046	6.75367	5.18002	3.04121	4.61383	7.97655	11.1393	9.11501	7.7413	6.07743	6.19315	6.74503	4.64782	5.2169	3.62462	3.52581	3.60872	5.802	7.07565	5.25753	4.07036	4.38155	5.23454	4.97384	3.19261	5.61836	BraA01g004680.3C	protein_coding	chrA01:2251103-2253093:+	gi|685257153|ref|XP_009123285.1|	1398	0	PREDICTED: protein TIC 22, chloroplastic-like [Brassica rapa]	gi|685257152|ref|XM_009125037.1|	793	0	PREDICTED: Brassica rapa protein TIC 22, chloroplastic-like (LOC103848014), mRNA	Q9SZB2	457
BraA01g004690.3C	0.666689	0.543585	1.36102	3.48619	3.3478	3.65556	1.94787	1.59592	1.4435	4.52491	4.2545	4.85129	1.7595	2.38387	1.53074	1.48496	1.13511	0.580519	0.788847	0.900795	1.11025	2.25159	2.73242	2.15175	2.62122	1.49702	2.4707	2.62769	2.06005	2.18673	2.42939	1.52745	1.95945	1.00312	0.903697	0.934722	BraA01g004690.3C	protein_coding	chrA01:2255055-2258094:+	gi|923599729|ref|XP_013740755.1|	2724	0	PREDICTED: UDP-glucuronate:xylan alpha-glucuronosyltransferase 2-like isoform X2 [Brassica napus]	gi|923599728|ref|XM_013885301.1|	1578	0	PREDICTED: Brassica napus UDP-glucuronate:xylan alpha-glucuronosyltransferase 2-like (LOC106443746), transcript variant X2, mRNA	Q8GWW4	959
BraA01g004700.3C	1.22969	3.92794	1.7351	0.266997	0.657927	0.407954	2.04296	2.732	2.16541	9.39632	8.15288	10.3925	1.60359	1.08631	1.45915	2.54393	2.21683	2.73986	4.36502	2.01578	2.51065	2.66151	1.14632	1.40077	2.28811	2.29992	2.88016	18.0682	16.3611	15.3386	2.62299	2.60062	2.55117	1.95907	1.60801	2.0917	BraA01g004700.3C	protein_coding	chrA01:2260889-2264695:+	gi|685257160|ref|XP_009123518.1|	4086	0	PREDICTED: probable disease resistance protein At4g33300 [Brassica rapa]	gi|923546599|ref|XM_013879710.1|	1589	0	PREDICTED: Brassica napus probable disease resistance protein At4g33300 (LOC106438518), mRNA	Q9SZA7	1226
BraA01g004710.3C	21.9015	52.4509	23.5253	56.0484	49.8018	54.3393	43.9619	46.5347	46.7494	26.5834	29.4592	27.6679	34.2777	31.4844	34.0185	82.4885	84.3784	57.8773	76.9687	62.6467	61.4728	64.7099	78.6295	73.3224	22.6653	18.8023	18.5025	30.3007	33.8768	35.3335	27.8401	27.7372	25.6982	14.3391	16.6388	19.147	BraA01g004710.3C	protein_coding	chrA01:2266051-2267973:+	gi|685257162|ref|XP_009123591.1|	2426	0	PREDICTED: cell division cycle 20.1, cofactor of APC complex-like [Brassica rapa]	gi|685257161|ref|XM_009125343.1|	1377	0	PREDICTED: Brassica rapa cell division cycle 20.1, cofactor of APC complex-like (LOC103848411), mRNA	Q9SZA4	877
BraA01g004720.3C	40.8359	66.2998	45.981	72.0682	69.3524	67.8926	79.416	68.1556	72.3676	56.7036	60.6986	56.234	78.9435	71.1829	85.3889	131.049	135.231	131.342	78.8193	83.2803	67.6469	82.6121	93.8641	84.1668	70.1969	58.7307	57.2786	58.0932	63.7612	67.3054	73.0866	62.3427	61.8853	58.4517	55.7682	74.8767	BraA01g004720.3C	protein_coding	chrA01:2268672-2270057:+	gi|685257164|ref|XP_009123672.1|	1212	3e-167	PREDICTED: eukaryotic translation initiation factor 3 subunit K-like [Brassica rapa]	gi|685257163|ref|XM_009125424.1|	687	0	PREDICTED: Brassica rapa eukaryotic translation initiation factor 3 subunit K-like (LOC103848502), mRNA	Q9SZA3	427
BraA01g004730.3C	5.25342	2.92537	5.22439	4.31779	3.53379	3.8901	2.45122	1.54556	2.09905	4.35374	3.62562	3.85905	3.20982	3.82335	3.7067	4.11099	4.73972	4.36849	3.97459	4.46772	4.26401	3.42293	3.72928	3.82917	3.7675	4.53342	3.7211	4.22772	3.89903	4.3715	3.6572	3.32235	3.35944	4.17362	3.68186	3.81892	BraA01g004730.3C	protein_coding	chrA01:2271769-2278367:+	gi|923546581|ref|XP_013735156.1|	8460	0	PREDICTED: 1-phosphatidylinositol-3-phosphate 5-kinase FAB1A-like isoform X1 [Brassica napus]	gi|923546582|ref|XM_013879703.1|	5106	0	PREDICTED: Brassica napus 1-phosphatidylinositol-3-phosphate 5-kinase FAB1A-like (LOC106438515), transcript variant X2, mRNA	Q0WUR5	2722
BraA01g004740.3C	0.230558	0.90233	0.294172	0.372321	0.393199	0.595972	0.280676	0.674556	0.520904	0.950781	0.186504	0.585243	1.09526	1.54575	0.510461	0.162169	0.235529	0	0.467663	0.642505	0.969984	0.860619	0.818946	0.853559	0.55625	0.621248	0.536503	1.07911	1.12206	1.30449	0.553266	0.243798	0.621158	1.25981	0.812555	0.787923	BraA01g004740.3C	protein_coding	chrA01:2278754-2282045:-	gi|923546590|ref|XP_013735161.1|	2611	0	PREDICTED: probable pectinesterase/pectinesterase inhibitor 44 isoform X2 [Brassica napus]	gi|923546589|ref|XM_013879707.1|	1515	0	PREDICTED: Brassica napus probable pectinesterase/pectinesterase inhibitor 44 (LOC106438516), transcript variant X2, mRNA	Q9SMY7	872
BraA01g004750.3C	12.1965	8.92041	13.4662	13.1769	12.2879	13.1385	7.61495	8.15815	8.25307	11.9204	14.099	12.5983	10.5489	10.7515	9.59523	10.6172	12.0071	12.3813	13.9618	13.2466	11.7167	14.6174	14.8146	13.7557	12.6248	12.9503	13.488	15.7362	17.043	16.1898	14.9397	13.8865	16.2078	17.0411	16.565	16.8565	BraA01g004750.3C	protein_coding	chrA01:2284179-2288996:+	gi|685257180|ref|XP_009124165.1|	4484	0	PREDICTED: F-box/LRR-repeat protein 15 isoform X1 [Brassica rapa]	gi|685257181|ref|XM_009125978.1|	2880	0	PREDICTED: Brassica rapa F-box/LRR-repeat protein 15 (LOC103849083), transcript variant X2, mRNA	Q9SMY8	1543
BraA01g004760.3C	13.9607	9.78313	13.2295	7.90373	8.17227	8.31692	7.05541	8.06878	7.65101	7.29371	7.87473	8.40926	7.60792	6.88074	7.03584	5.04253	5.88458	6.25885	6.42893	6.71039	8.23473	6.01604	7.40224	7.73658	7.95018	9.65862	10.8678	8.21655	8.27204	7.94535	7.36425	5.82519	6.6353	8.69512	8.75608	7.61777	BraA01g004760.3C	protein_coding	chrA01:2289923-2302380:+	gi|685257186|ref|XP_009124357.1|	7661	0	PREDICTED: myosin-15 isoform X1 [Brassica rapa]	gi|685257185|ref|XM_009126109.1|	3279	0	PREDICTED: Brassica rapa myosin-15 (LOC103849301), transcript variant X1, mRNA	Q0WPU1	2671
BraA01g004770.3C	11.9163	9.90099	11.0049	18.4142	14.5159	16.0902	19.0658	22.9409	20.2988	19.3052	17.6467	22.662	19.8678	17.9565	21.218	5.45471	7.72901	11.9819	10.9345	11.2129	10.9418	15.9364	12.4035	14.2205	18.4565	15.9015	17.41	20.7809	22.7062	20.7523	24.6111	23.2011	24.3677	14.3796	15.4859	12.8286	BraA01g004770.3C	protein_coding	chrA01:2303170-2304984:-	gi|685257190|ref|XP_009124478.1|	1652	0	PREDICTED: uncharacterized protein LOC103849450 [Brassica rapa]	gi|923546566|ref|XM_013879696.1|	927	0	PREDICTED: Brassica napus putative 2-succinyl-6-hydroxy-2,4-cyclohexadiene-1-carboxylate synthase (LOC106438511), mRNA	Q6IE26	58.9
BraA01g004780.3C	0.451573	0.220914	0.493858	0.565527	0.770123	0.788291	0.816747	0.892233	0.801623	0.432298	0.487052	0.556756	0.544811	0.484404	0.571311	1.58813	1.05442	1.17962	0.196279	0.817153	0.474955	0.653606	0.810811	0.551139	1.00301	0.591008	0.667175	0.794567	0.508304	0.793474	0.240807	0.238753	0.347602	1.28738	1.04933	0.983599	BraA01g004780.3C	protein_coding	chrA01:2305691-2308408:+	gi|685257194|ref|XP_009124630.1|	4873	0	PREDICTED: pentatricopeptide repeat-containing protein At4g33170 [Brassica rapa]	gi|685257193|ref|XM_009126382.1|	2718	0	PREDICTED: Brassica rapa pentatricopeptide repeat-containing protein At4g33170 (LOC103849612), mRNA	Q9SMZ2	1630
BraA01g004790.3C	16.0049	7.3404	15.5344	17.4723	17.2219	17.0589	24.2854	20.2205	21.6315	11.4177	12.4073	14.3644	17.4238	18.1649	18.5613	11.0565	10.608	15.9582	10.9422	10.7159	11.9489	18.7457	21.1624	23.6033	28.8072	30.3421	30.5186	13.1655	15.4325	13.1474	24.309	21.835	22.3998	30.6224	24.329	20.8867	BraA01g004790.3C	protein_coding	chrA01:2308519-2309745:-	gi|685257192|ref|XP_009124566.1|	2172	0	PREDICTED: F-box only protein 13 [Brassica rapa]	gi|685257191|ref|XM_009126318.1|	1224	0	PREDICTED: Brassica rapa F-box only protein 13 (LOC103849530), mRNA	Q9SMZ3	644
BraA01g004800.3C	45.9852	67.3544	43.3365	31.2661	29.7774	30.6304	8.5113	7.62607	7.28762	3.69493	3.74663	3.75097	2.79396	1.95185	2.84847	0.542961	0.675924	1.08026	17	34.1954	32.9111	11.7904	13.8301	13.0957	11.0265	10.3406	9.7512	3.01534	3.06675	3.82502	11.5848	11.7484	10.6956	2.25309	2.66073	2.08725	BraA01g004800.3C	protein_coding	chrA01:2314063-2319737:+	gi|685257202|ref|XP_009124890.1|	5476	0	PREDICTED: alpha-aminoadipic semialdehyde synthase isoform X2 [Brassica rapa]	gi|685257201|ref|XM_009126642.1|	3166	0	PREDICTED: Brassica rapa alpha-aminoadipic semialdehyde synthase (LOC103849713), transcript variant X4, mRNA	Q9SMZ4	1903
BraA01g004810.3C	0	0	0	0	0	0	0	0	0	0	0	0.941963	0	0	0	0	0	0	0	0	0	0	0	0	0	0	0	0	0	0	0	0	0	0	0	0	BraA01g004810.3C	protein_coding	chrA01:2320214-2320402:+	gi|685257204|ref|XP_009124926.1|	312	4e-36	PREDICTED: uncharacterized protein LOC103849979 [Brassica rapa]	gi|685257203|ref|XM_009126678.1|	189	1e-93	PREDICTED: Brassica rapa uncharacterized LOC103849979 (LOC103849979), mRNA	.	.
BraA01g004830.3C	0	0	0	0	0	0	0	0	0	0	0	0	0	0	0	0	0	0	0	0	0	0	0	0.536916	0	0.50802	0	0	0	0	0	0	0	0	0	0	BraA01g004830.3C	protein_coding	chrA01:2323262-2323447:+	gi|685257208|ref|XP_009124950.1|	313	3e-36	PREDICTED: uncharacterized protein LOC103849998 [Brassica rapa]	gi|685257207|ref|XM_009126702.1|	186	6e-92	PREDICTED: Brassica rapa uncharacterized LOC103849998 (LOC103849998), mRNA	.	.
BraA01g004840.3C	0	0	0	0	0	0	0	0	0	0	0.508375	0	0.995159	0	0	0	0	0	0	0	0	0	0	0	0	0	0	0	0	0	0	0	0	0	0	0	BraA01g004840.3C	protein_coding	chrA01:2324618-2324803:+	gi|685257210|ref|XP_009124962.1|	312	5e-36	PREDICTED: uncharacterized protein LOC103850008 [Brassica rapa]	gi|685257209|ref|XM_009126714.1|	186	6e-92	PREDICTED: Brassica rapa uncharacterized LOC103850008 (LOC103850008), mRNA	.	.
BraA01g004850.3C	0.257852	0.588671	0.263197	1.11039	0.390886	0.484745	3.34829	1.28021	0.97095	0.62028	0.927037	0.523621	0.54441	0.460998	0.676611	2.29732	1.99022	2.02072	16.6496	14.4584	12.0233	14.7583	16.4391	14.1967	11.3361	12.0431	11.9114	12.7884	11.9513	10.8256	14.117	16.2687	14.0623	13.2319	11.4642	13.0146	BraA01g004850.3C	protein_coding	chrA01:2325449-2327274:-	gi|685257212|ref|XP_009124971.1|	1494	0	PREDICTED: uncharacterized protein LOC103850019 [Brassica rapa]	gi|685257211|ref|XM_009126723.1|	1009	0	PREDICTED: Brassica rapa uncharacterized LOC103850019 (LOC103850019), mRNA	.	.
BraA01g004860.3C	0.517225	0.379548	0.791921	2.98304	3.08731	2.67396	3.52608	3.30169	2.33715	2.53287	2.64985	2.10066	2.86659	2.08061	1.52687	4.72946	6.34053	5.0667	3.01627	1.83447	1.76802	5.65413	7.4901	8.10125	1.66383	2.50863	3.34325	2.80306	2.75691	2.54473	3.72353	1.91425	2.66029	4.17788	2.66417	2.85535	BraA01g004860.3C	protein_coding	chrA01:2328475-2329762:+	gi|685257216|ref|XP_009124988.1|	1135	1e-155	PREDICTED: rho GTPase-activating protein 7 isoform X2 [Brassica rapa]	gi|685257215|ref|XM_009126740.1|	678	0	PREDICTED: Brassica rapa rho GTPase-activating protein 7 (LOC103850027), transcript variant X2, mRNA	.	.
BraA01g004870.3C	0.171397	0.586945	0	0.237244	0.097435	0.080554	0.166924	0	0	0	0	0	0	0	0	0.120557	0.233457	0.111933	0	0	0	0	0.0936625	0	0	0.0923673	0.0886306	0	0.0794417	0.084327	0	0.0906201	0	0.0814387	0	0	BraA01g004870.3C	protein_coding	chrA01:2333967-2335233:-	gi|685307838|ref|XP_009144636.1|	1121	3e-149	PREDICTED: uncharacterized protein LOC103868285 [Brassica rapa]	.	.	.	.	.	.
BraA01g004880.3C	0.0457327	0.134238	0.0933616	0.253208	0.103992	0.171949	0.222696	0.0486555	0.103325	0.0471485	0.147978	0	0.144835	0	0.0900031	0.0643348	0.124583	0.0597326	0	0	0	0.243871	0.0999652	0.0520951	0.0980765	0	0.0472974	0.180251	0.0847876	0	0.0487751	0	0.089608	0.086919	0.0495926	0.0480892	BraA01g004880.3C	protein_coding	chrA01:2336305-2339111:+	gi|922409869|ref|XP_013623062.1|	2069	0	PREDICTED: kinesin-like protein FRA1 [Brassica oleracea var. oleracea]	gi|685258260|ref|XM_009131761.1|	1136	0	PREDICTED: Brassica rapa chromosome-associated kinesin KIF4A-like (LOC103854792), mRNA	F4K0J3	410
BraA01g004890.3C	1.3134	1.04411	1.34063	0.90899	0.746637	0.15432	0.639562	0.524004	0.83458	2.70812	2.47904	2.16704	0.953228	1.05667	1.53473	0	0	0.214433	17.8162	22.127	15.7999	12.7818	8.9716	8.04167	20.5089	17.2527	21.4787	15.4491	15.7516	14.2162	21.3619	20.138	19.5422	3.90037	4.53981	5.26536	BraA01g004890.3C	protein_coding	chrA01:2341514-2343837:+	gi|923520460|ref|XP_013666517.1|	1761	0	PREDICTED: (S)-coclaurine N-methyltransferase-like [Brassica napus]	gi|923520459|ref|XM_013811063.1|	1068	0	PREDICTED: Brassica napus (S)-coclaurine N-methyltransferase-like (LOC106371041), mRNA	Q5C9L6	337
BraA01g004900.3C	1.71901	4.37298	4.91302	2.8553	3.51798	4.52429	7.36625	4.3893	3.10704	6.73447	8.52874	8.72701	5.08116	5.90077	8.11934	1.93458	5.15116	6.73573	13.5987	14.981	16.6338	8.80001	9.39379	8.22429	8.11035	7.04056	8.53356	12.8731	17.2099	15.2235	11.7336	5.08965	9.09416	6.53426	8.57485	8.67642	BraA01g004900.3C	protein_coding	chrA01:2344049-2344508:-	gi|685257218|ref|XP_009124998.1|	389	4e-47	PREDICTED: uncharacterized protein At4g33100 [Brassica rapa]	gi|923637193|ref|XM_013784538.1|	255	4e-130	PREDICTED: Brassica napus uncharacterized protein At4g33100 (LOC106345318), mRNA	Q9SMZ9	147
BraA01g004910.3C	28.8224	15.8485	26.6927	25.549	25.1373	23.2936	20.5566	18.015	17.6191	53.3005	53.9249	53.138	41.9559	39.8745	39.1739	26.2164	27.5674	28.3106	34.7867	32.8627	32.5279	22.9743	19.8204	19.707	34.3436	34.017	34.6442	37.3843	34.0246	36.3141	30.0987	34.8568	31.869	23.9938	17.71	18.8588	BraA01g004910.3C	protein_coding	chrA01:2345278-2349548:+	gi|685257226|ref|XP_009125037.1|	4672	0	PREDICTED: aminopeptidase M1 [Brassica rapa]	gi|685257225|ref|XM_009126789.1|	2614	0	PREDICTED: Brassica rapa aminopeptidase M1 (LOC103850079), mRNA	Q8VZH2	1683
BraA01g004920.3C	14.0619	7.7568	14.1171	24.0831	22.8301	21.8119	11.7787	11.1435	12.6166	21.4176	21.845	22.6799	16.2497	15.8291	15.6023	21.8167	19.7052	18.5177	15.8461	12.3732	11.9902	15.4291	16.8233	14.9635	15.2023	10.9773	12.6278	14.9392	14.2153	15.2034	14.627	14.6246	17.6314	7.5888	8.65974	9.79676	BraA01g004920.3C	protein_coding	chrA01:2350131-2354409:-	gi|685257228|ref|XP_009125048.1|	2691	0	PREDICTED: serine/threonine-protein kinase tricorner [Brassica rapa]	gi|685257227|ref|XM_009126800.1|	1488	0	PREDICTED: Brassica rapa serine/threonine-protein kinase tricorner (LOC103850090), mRNA	Q6TGC6	427
BraA01g004930.3C	26.7436	22.5853	26.3942	26.2585	24.9022	27.2469	22.8834	22.2975	24.4091	19.4157	18.2111	20.2608	20.442	22.6084	20.042	19.766	23.6414	25.7545	23.7105	27.4599	26.8245	23.0445	25.6156	25.6895	16.3324	24.1797	18.6833	15.5319	18.3881	16.6724	17.2522	16.2935	17.0622	22.8336	23.1751	21.1068	BraA01g004930.3C	protein_coding	chrA01:2356581-2359494:-	gi|685257230|ref|XP_009125059.1|	2070	0	PREDICTED: peptidyl-prolyl cis-trans isomerase CYP57 [Brassica rapa]	gi|923504955|ref|XM_013803675.1|	1419	0	PREDICTED: Brassica napus peptidyl-prolyl cis-trans isomerase CYP57-like (LOC106363992), mRNA	Q6Q152	715
BraA01g004940.3C	87.9167	225.779	82.9915	29.1902	29.9941	29.7338	117.813	76.0511	80.3322	77.772	79.098	78.1003	51.9818	53.4835	47.1768	51.9741	54.6995	58.9079	177.641	237.535	244.072	142.392	124.312	129.566	130.31	251.445	259.356	294.222	292.259	303.848	165.72	164.764	162.941	310.526	331.301	276.041	BraA01g004940.3C	protein_coding	chrA01:2360475-2362602:+	gi|685257232|ref|XP_009125069.1|	2268	0	PREDICTED: uncharacterized protein LOC103850108 [Brassica rapa]	gi|923504958|ref|XM_013803762.1|	1419	0	PREDICTED: Brassica napus uncharacterized LOC106364097 (LOC106364097), mRNA	O82645	756
BraA01g004950.3C	0	0.19719	0	1.30184	0.687421	1.32608	0.588838	1.0721	0.910684	7.48002	7.82547	3.88803	5.95723	4.97242	5.15625	20.4132	26.9023	15.0044	0	0	0	0.214943	0	0.459156	0.216106	0	0.208435	0.595761	0.186825	0	9.02777	7.8852	6.51574	13.4065	12.4573	12.5035	BraA01g004950.3C	protein_coding	chrA01:2371033-2371467:+	gi|674957927|emb|CDX75319.1|	590	1e-75	BnaA01g03830D [Brassica napus]	gi|923520468|ref|XM_013811090.1|	435	0	PREDICTED: Brassica napus glutaredoxin-C6 (LOC106371065), mRNA	Q8L9S3	218
BraA01g004960.3C	6.48046	7.95568	6.30279	12.5807	12.9982	12.9299	6.90673	5.52872	5.17975	11.4713	11.8032	11.7322	7.80929	7.3451	7.94098	7.99837	7.24474	10.7001	9.23866	8.67345	9.13089	10.3672	9.95585	9.19272	5.11331	4.01952	3.85691	6.2048	6.80074	5.715	8.15044	7.11121	6.64833	3.07917	2.78445	3.85719	BraA01g004960.3C	protein_coding	chrA01:2374791-2376708:-	gi|685257238|ref|XP_009125098.1|	2432	0	PREDICTED: UDP-sulfoquinovose synthase, chloroplastic [Brassica rapa]	gi|685257237|ref|XM_009126850.1|	1434	0	PREDICTED: Brassica rapa UDP-sulfoquinovose synthase, chloroplastic (LOC103850131), mRNA	O48917	860
BraA01g004970.3C	2.04411	0.814815	0.85005	1.25751	1.29114	0.284652	0.663587	0.644371	0.855241	8.42956	5.47096	8.2251	6.154	4.95393	5.5128	0.639014	0.618721	1.87879	0.0767827	0	0.637023	0.161485	0.413716	0.431202	0.32472	0.244797	0.313192	0.820586	1.33343	0.744961	2.66456	2.32161	3.18932	0.359723	0.0820975	0.238826	BraA01g004970.3C	protein_coding	chrA01:2378267-2380469:+	gi|685257240|ref|XP_009125109.1|	1665	0	PREDICTED: zinc transporter 9 [Brassica rapa]	gi|685257239|ref|XM_009126861.1|	1158	0	PREDICTED: Brassica rapa zinc transporter 9 (LOC103850142), mRNA	O82643	501
BraA01g004980.3C	135.332	46.7705	138.023	128.234	129.471	129.466	72.8382	81.948	82.3098	115.817	114.867	118.943	135.462	139.567	140.398	85.4819	83.8328	105.202	108.692	106.167	110.751	105.836	90.1984	94.0424	124.653	150.952	152.329	82.6139	82.5638	83.7373	137.988	140.002	136.142	86.9225	85.4954	84.0787	BraA01g004980.3C	protein_coding	chrA01:2382325-2386609:+	gi|685257242|ref|XP_009125119.1|	5471	0	PREDICTED: glycine dehydrogenase (decarboxylating) 1, mitochondrial [Brassica rapa]	gi|685257241|ref|XM_009126871.1|	3138	0	PREDICTED: Brassica rapa glycine dehydrogenase (decarboxylating) 1, mitochondrial (LOC103850153), mRNA	Q94B78	1917
BraA01g004990.3C	6.89226	7.95737	8.44218	7.50488	8.30633	12.6979	4.16168	4.54631	6.22873	5.25817	4.16292	5.03861	8.58559	7.54123	7.46028	11.0531	10.8899	11.3427	8.10854	10.3368	8.84396	11.173	8.28603	11.1486	4.87769	4.16001	4.13428	8.82869	6.00572	8.6809	7.93884	8.01688	8.37285	3.27484	4.93282	5.65297	BraA01g004990.3C	protein_coding	chrA01:2387271-2388596:-	gi|937575345|ref|NP_001302481.1|	851	2e-112	calcineurin B-like protein 10 [Brassica napus]	gi|685257243|ref|XM_009126882.1|	629	0	PREDICTED: Brassica rapa calcineurin B-like protein 10 (LOC103850162), mRNA	Q7FRS8	314
BraA01g005000.3C	0	0	0	0.288723	0.142293	0.2941	0	0	0	0.129027	0.269972	0.127074	0	0.134252	0	0.968328	0.59664	0.408663	0	0	0	0.33369	0.0683916	0	0.0670994	0	0	0.12332	0.174023	0	0.133479	0.13234	0.122611	0	0	0	BraA01g005000.3C	protein_coding	chrA01:2392619-2394297:+	gi|685257256|ref|XP_009125187.1|	2318	0	PREDICTED: homeobox protein ATH1 [Brassica rapa]	gi|685257257|ref|XM_009126946.1|	1398	0	PREDICTED: Brassica rapa homeobox protein ATH1 (LOC103850218), transcript variant X2, mRNA	P48731	647
BraA01g005010.3C	0	0	0	0	0	0.867439	0	0.981818	0	2.53708	2.32247	1.56168	0.324736	0.989932	0.908084	1.29821	2.09497	1.60712	0	0	0	0	0	0	0	0	0	0	0	0.302689	0	0	0	0.292322	0	0	BraA01g005010.3C	protein_coding	chrA01:2394687-2395226:-	gi|674964442|emb|CDX68904.1|	368	2e-43	BnaC01g05490D [Brassica napus]	gi|923735804|ref|XR_001274854.1|	199	5e-99	PREDICTED: Brassica napus uncharacterized LOC106374209 (LOC106374209), ncRNA	.	.
BraA01g005020.3C	0	0	0	0	0	0	0	0	0	0.391271	0	0.385349	0	0	0	0	0	0	0	0	0	0	0	0	0	0	0	0	0	0	0	0	0	0	0	0	BraA01g005020.3C	protein_coding	chrA01:2395613-2396104:+	gi|923516813|ref|XP_013650405.1|	287	2e-29	PREDICTED: homeobox protein ATH1-like [Brassica napus]	gi|923516812|ref|XM_013794951.1|	187	2e-92	PREDICTED: Brassica napus homeobox protein ATH1-like (LOC106354907), mRNA	.	.
BraA01g005070.3C	0	0.294769	0	0	0	0	0	0	0	0	0.324941	0	0	0	0	0	0	0	0	0.61059	0	0	0.329267	0	0.646092	0	0.311578	0	0	0	0	0.637143	0	6.01219	0.326697	0.633587	BraA01g005070.3C	protein_coding	chrA01:2411379-2419486:-	gi|685257251|ref|XP_009125161.1|	408	2e-49	PREDICTED: uncharacterized protein LOC103850180 isoform X3 [Brassica rapa]	gi|685257250|ref|XM_009126913.1|	291	4e-150	PREDICTED: Brassica rapa uncharacterized LOC103850180 (LOC103850180), transcript variant X3, mRNA	.	.
BraA01g005090.3C	0	0	0	0	0	0.0872029	0.0903508	0	0	0	0	0	0	0	0	0	0.126363	0	0	0.0940115	0.0975758	0	0	0	0.0994776	0.199983	0.0959461	0	0.0859988	0	0.0989438	0	0	0	0	0.195105	BraA01g005090.3C	protein_coding	chrA01:2424668-2427616:-	gi|674957917|emb|CDX75309.1|	379	3e-42	BnaA01g03930D [Brassica napus]	gi|923520474|ref|XM_013811146.1|	362	0	PREDICTED: Brassica napus uncharacterized LOC106371109 (LOC106371109), mRNA	.	.
BraA01g005100.3C	48.3261	26.3075	42.7264	16.3568	13.1403	15.3105	12.0141	12.997	14.6796	35.8695	33.7799	35.5089	17.9536	17.2156	20.6242	24.4301	25.3672	24.1686	25.0831	24.7589	25.3827	16.1581	16.3621	13.5747	17.3372	13.6832	15.8547	34.2237	36.36	34.4712	30.6564	31.6613	32.5018	22.5921	21.1697	23.9283	BraA01g005100.3C	protein_coding	chrA01:2431232-2433581:+	gi|685257264|ref|XP_009125229.1|	2448	0	PREDICTED: vacuolar-processing enzyme gamma-isozyme [Brassica rapa]	gi|685257263|ref|XM_009126981.1|	1464	0	PREDICTED: Brassica rapa vacuolar-processing enzyme gamma-isozyme (LOC103850260), mRNA	Q39119	808
BraA01g005110.3C	10.9587	13.1049	15.2696	16.8542	15.2283	15.533	12.0279	10.5487	7.86007	25.8239	25.328	19.7812	17.0776	13.4348	14.7203	23.002	21.3238	22.2653	44.6336	40.0137	40.9818	36.1756	31.3686	28.7314	25.3668	20.2482	19.0693	37.5365	32.4108	35.602	32.837	29.9818	29.4818	19.0096	17.1652	28.1682	BraA01g005110.3C	protein_coding	chrA01:2433901-2434931:-	gi|685257266|ref|XP_009125241.1|	885	1e-119	PREDICTED: UPF0587 protein C1orf123 homolog [Brassica rapa]	gi|685257265|ref|XM_009126993.1|	504	0	PREDICTED: Brassica rapa UPF0587 protein C1orf123 homolog (LOC103850268), mRNA	.	.
BraA01g005120.3C	13.8836	4.95605	12.5177	5.43119	5.71242	5.93714	6.9903	7.41818	7.27429	7.86496	8.11759	8.16236	4.35146	4.3557	4.29826	4.09657	3.63128	2.16961	5.96922	8.00088	7.87283	7.41439	6.34295	7.6389	5.76132	8.68661	8.5897	6.62793	6.23537	6.61881	4.46184	4.44547	4.86203	10.1338	7.78342	5.69295	BraA01g005120.3C	protein_coding	chrA01:2437214-2444079:+	gi|685257268|ref|XP_009125252.1|	6359	0	PREDICTED: uncharacterized protein LOC103850279 [Brassica rapa]	gi|923504977|ref|XM_013804385.1|	4275	0	PREDICTED: Brassica napus uncharacterized LOC106364868 (LOC106364868), mRNA	.	.
BraA01g005130.3C	19.7246	18.3103	21.6601	26.0342	23.6208	26.709	21.8079	23.3074	24.3825	18.9185	17.9612	17.483	27.095	24.0203	24.3809	33.8887	33.4731	30.303	15.1675	13.9672	14.1141	16.0791	16.7867	17.3581	17.3797	13.8971	13.7111	18.6392	18.7342	19.1703	12.5876	12.352	12.3943	19.666	19.8115	17.5533	BraA01g005130.3C	protein_coding	chrA01:2444886-2448605:-	gi|685257270|ref|XP_009125264.1|	3762	0	PREDICTED: nuclear pore complex protein Nup85 [Brassica rapa]	gi|923504979|ref|XM_013804470.1|	2169	0	PREDICTED: Brassica napus nuclear pore complex protein NUP85-like (LOC106364969), mRNA	Q8RXH2	1269
BraA01g005140.3C	11.5989	13.1172	9.53299	15.1514	9.59082	14.8672	17.311	11.0581	10.21	14.9086	12.1853	9.9416	9.06415	8.72569	10.2276	24.1574	25.442	11.6081	10.2358	9.15886	9.18923	9.96049	9.71338	9.78073	7.91462	5.03307	4.05051	8.01513	6.42331	9.7828	6.10493	3.50429	5.75547	8.01626	7.67739	5.54389	BraA01g005140.3C	protein_coding	chrA01:2449238-2451056:+	gi|685257272|ref|XP_009125275.1|	1009	1e-137	PREDICTED: peptidyl-tRNA hydrolase 2, mitochondrial [Brassica rapa]	gi|923520476|ref|XM_013811159.1|	582	0	PREDICTED: Brassica napus peptidyl-tRNA hydrolase 2, mitochondrial-like (LOC106371117), mRNA	Q9Y3E5	134
BraA01g005150.3C	0.556632	0.816931	0.662867	1.45535	1.68764	1.39525	1.89737	1.08571	0.838407	1.05208	1.8011	2.6375	2.35047	1.59227	2.55609	9.13554	9.47724	4.60453	0.752714	0.564069	0.683031	0.593651	0.811147	0.528393	0.696343	0.499956	0.575677	1.18837	1.03199	0.912873	0.593663	0.784799	0	0.440803	0.301806	0.487762	BraA01g005150.3C	protein_coding	chrA01:2453817-2454952:-	gi|685257274|ref|XP_009125288.1|	1556	0	PREDICTED: GATA transcription factor 9 [Brassica rapa]	gi|923520478|ref|XM_013811170.1|	945	0	PREDICTED: Brassica napus GATA transcription factor 9-like (LOC106371127), mRNA	O82632	423
BraA01g005160.3C	3.0835	2.84555	2.14597	9.47391	8.84415	9.84796	6.27906	6.93394	6.80829	15.5697	14.8148	15.1561	10.1353	11.389	11.4817	12.6189	11.4545	7.73451	6.32564	2.37903	1.69529	7.39929	7.7741	9.0207	7.1012	6.83574	5.36332	11.1175	13.8696	14.9639	9.4922	9.70765	11.8432	6.62632	7.71343	7.62698	BraA01g005160.3C	protein_coding	chrA01:2462816-2467248:+	gi|685257276|ref|XP_009125299.1|	4483	0	PREDICTED: homeobox-leucine zipper protein ATHB-8 [Brassica rapa]	gi|923504984|ref|XM_013804628.1|	2502	0	PREDICTED: Brassica napus homeobox-leucine zipper protein ATHB-8 (LOC106365075), transcript variant X2, mRNA	Q39123	1686
BraA01g005170.3C	0.890951	0.871725	0.909422	1.15102	2.83631	2.34491	0.520619	0.758314	0.402589	0.918533	0.384381	1.26648	0.752437	1.14687	0.175341	0.25067	0.24271	2.32738	2.16864	2.88914	4.68542	3.80082	5.25823	4.46557	4.20353	2.68879	3.87002	3.33602	2.31253	4.20812	2.85067	2.4495	2.79315	1.524	0.772918	0.562116	BraA01g005170.3C	protein_coding	chrA01:2469753-2470244:-	gi|685257280|ref|XP_009125319.1|	865	1e-116	PREDICTED: lachrymatory-factor synthase-like [Brassica rapa]	gi|923520481|ref|XM_013811178.1|	492	0	PREDICTED: Brassica napus lachrymatory-factor synthase-like (LOC106371137), mRNA	P59082	79
BraA01g005180.3C	1.50635	1.32646	0.922547	4.30911	2.9115	4.10618	3.08078	1.76289	2.042	2.79537	2.27459	1.98832	1.11314	1.61587	2.96453	0.63572	0.410355	0.196748	7.63869	9.15886	11.5658	12.6916	14.1585	12.5262	15.5062	9.09199	10.7494	4.156	3.35129	5.33607	12.2099	11.6279	9.00214	2.29036	4.08372	4.59351	BraA01g005180.3C	protein_coding	chrA01:2481306-2481887:+	gi|685257289|ref|XP_009125357.1|	1028	2e-140	PREDICTED: uncharacterized protein LOC103850364 [Brassica rapa]	gi|685257288|ref|XM_009127109.1|	582	0	PREDICTED: Brassica rapa uncharacterized LOC103850364 (LOC103850364), mRNA	.	.
BraA01g005190.3C	61.7883	66.8856	62.7281	56.7774	55.9807	57.4508	52.5091	56.572	53.7341	39.9663	37.767	38.4565	48.8425	45.6476	45.6369	51.8706	52.7016	56.6474	34.1573	42.8589	41.7499	36.1565	44.8443	46.9511	25.2834	30.5768	33.1032	31.0636	31.3235	30.6555	29.1872	30.0376	29.2482	61.1165	53.0308	49.9395	BraA01g005190.3C	protein_coding	chrA01:2483519-2487854:-	gi|685257293|ref|XP_009125374.1|	4003	0	PREDICTED: poly(A) polymerase PAPalpha isoform X2 [Brassica rapa]	gi|685257296|ref|XM_009127137.1|	2216	0	PREDICTED: Brassica rapa poly(A) polymerase PAPalpha (LOC103850374), transcript variant X4, mRNA	Q8VYW1	1320
BraA01g005200.3C	18.7054	24.6488	17.936	74.2747	72.3224	74.0003	56.7983	43.7551	48.3089	38.8286	37.1574	36.9619	43.6154	45.0625	38.6099	112.255	118.384	42.3644	32.4486	25.529	28.0867	65.0202	63.396	61.4838	66.8579	44.1912	48.0051	27.616	26.1555	29.1273	74.9627	79.6511	76.6956	39.9801	33.7385	46.2922	BraA01g005200.3C	protein_coding	chrA01:2490400-2493336:+	gi|685257299|ref|XP_009125389.1|	2488	0	PREDICTED: ATP-dependent 6-phosphofructokinase 6 [Brassica rapa]	gi|685257298|ref|XM_009127141.1|	1392	0	PREDICTED: Brassica rapa ATP-dependent 6-phosphofructokinase 6 (LOC103850396), mRNA	Q9M076	900
BraA01g005210.3C	0.398951	6.73341	2.13792	9.93994	7.03061	9.56255	9.42208	9.01954	7.43622	9.15147	6.34688	6.17741	9.16022	8.34516	8.14589	11.6455	7.60767	11.2032	32.5716	22.2355	19.8265	23.1889	21.1473	21.5866	9.30438	9.24493	10.2119	15.8226	12.2042	16.6841	14.3604	14.0269	11.4324	5.40247	4.43439	4.61459	BraA01g005210.3C	protein_coding	chrA01:2493883-2495693:-	gi|685257301|ref|XP_009125401.1|	1562	0	PREDICTED: serine/threonine-protein kinase Aurora-1 [Brassica rapa]	gi|685257300|ref|XM_009127153.1|	879	0	PREDICTED: Brassica rapa serine/threonine-protein kinase Aurora-1 (LOC103850407), mRNA	Q9M077	564
BraA01g005220.3C	2.90148	2.88592	2.83073	2.79578	3.09836	3.23961	2.93504	2.71171	2.33603	4.67701	4.54721	4.29696	2.35224	2.56217	2.08217	3.31495	3.99572	3.47563	3.56048	3.34636	2.96742	2.64994	3.27623	3.81643	3.48936	3.0236	3.13338	3.98045	4.27966	4.21158	2.11999	2.42398	2.62269	2.81819	3.09422	3.18584	BraA01g005220.3C	protein_coding	chrA01:2496630-2506048:+	gi|923505000|ref|XP_013660682.1|	9519	0	PREDICTED: uncharacterized protein LOC106365719 [Brassica napus]	gi|923504999|ref|XM_013805228.1|	2741	0	PREDICTED: Brassica napus uncharacterized LOC106365719 (LOC106365719), mRNA	F4JV59	3170
BraA01g005230.3C	0.102538	0.150487	0.366321	1.84509	1.34067	1.49392	1.44799	0.763636	1.38999	2.11424	2.82014	2.86307	0.595349	0.87994	0.857635	1.00972	1.11732	0.20089	0.883944	0.103908	0.0539235	1.85907	1.90513	2.27765	1.75918	1.54723	1.53766	3.23314	3.27927	2.8251	3.55417	3.90334	4.52049	0.876967	1.00073	1.0243	BraA01g005230.3C	protein_coding	chrA01:2506531-2509850:-	gi|674957896|emb|CDX75288.1|	3060	0	BnaA01g04140D [Brassica napus]	gi|685257304|ref|XM_009127178.1|	1693	0	PREDICTED: Brassica rapa carotenoid cleavage dioxygenase 8, chloroplastic (LOC103850421), mRNA	Q8VY26	1041
BraA01g005240.3C	7.24227	14.0477	4.66889	37.7534	35.1033	38.8147	54.075	54.8822	64.8763	141.47	138.822	127.718	32.996	25.6235	31.8816	60.0562	68.5328	52.9389	80.6672	8.49783	8.95364	40.3812	73.0429	70.7749	46.8669	29.0323	26.1495	150.736	157.591	149.654	47.564	48.2331	53.4007	66.7702	68.7528	67.4702	BraA01g005240.3C	protein_coding	chrA01:2518757-2519446:-	gi|685257307|ref|XP_009125436.1|	1074	2e-146	PREDICTED: ethylene-responsive transcription factor ERF043 [Brassica rapa]	gi|685257306|ref|XM_009127188.1|	690	0	PREDICTED: Brassica rapa ethylene-responsive transcription factor ERF043 (LOC103850433), mRNA	Q9M080	264
BraA01g005250.3C	6.55473	4.40914	6.62093	16.4446	13.8956	14.6971	8.71104	7.5548	12.9581	14.4304	15.1705	13.3107	8.14496	8.34966	8.26399	11.1419	10.8811	10.7908	15.373	7.88774	6.31963	14.8552	25.5213	23.4888	12.3731	8.46305	8.68559	8.94801	9.93708	10.6825	18.4237	19.9271	18.6629	5.19077	4.88672	9.18998	BraA01g005250.3C	protein_coding	chrA01:2525110-2528382:-	gi|685257309|ref|XP_009125447.1|	1825	0	PREDICTED: uncharacterized protein LOC103850444 isoform X1 [Brassica rapa]	gi|685257308|ref|XM_009127199.1|	1284	0	PREDICTED: Brassica rapa uncharacterized LOC103850444 (LOC103850444), transcript variant X1, mRNA	Q8W4K5	127
BraA01g005260.3C	0.628456	1.69096	0.481113	1.01488	1.60768	0.886094	3.21328	3.17595	3.01725	0.809889	0.677833	0.478578	1.82446	1.01122	1.23682	2.87327	5.13605	2.66773	1.11541	1.2737	0.826247	0.335126	1.88886	5.54813	0.842351	0.8467	0.974936	0.154812	1.31079	1.39139	0.167566	1.8275	0.46177	4.18052	3.91861	3.96503	BraA01g005260.3C	protein_coding	chrA01:2529842-2531567:-	gi|685257313|ref|XP_009125466.1|	531	4e-66	PREDICTED: uncharacterized protein LOC103850460 [Brassica rapa]	gi|685257314|ref|XM_009127226.1|	302	6e-156	PREDICTED: Brassica rapa uncharacterized LOC103850460 (LOC103850460), transcript variant X2, mRNA	O94675	50.8
BraA01g005270.3C	1.41403	1.84468	0.481113	3.47957	1.60768	0.886094	1.37712	2.00586	2.12983	0.485934	0.508375	1.91431	1.49274	3.03366	0.927612	1.98919	0.642007	1.23126	1.91214	0	0	0	0	0	1.51623	0	0	0.464437	0.436929	0	0	0	0.92354	2.68748	0.511123	1.48689	BraA01g005270.3C	protein_coding	chrA01:2531707-2531892:-	gi|674957867|emb|CDX75259.1|	198	1e-17	BnaA01g04430D [Brassica napus]	gi|685257314|ref|XM_009127226.1|	186	6e-92	PREDICTED: Brassica rapa uncharacterized LOC103850460 (LOC103850460), transcript variant X2, mRNA	.	.
BraA01g005280.3C	0	0	0	0	0	0	0.192953	0	0	0	0	0	0	0	0	0.139356	0.13493	0	0	0	0	0	0.108267	0	0	0	0.204902	0	0	0	0	0	0	0.0941377	0	0	BraA01g005280.3C	protein_coding	chrA01:2532383-2533434:-	gi|674957892|emb|CDX75284.1|	1379	0	BnaA01g04180D [Brassica napus]	.	.	.	.	.	.
BraA01g005300.3C	0	0	0	0	0	0	0	0	0	0	0	0	0	0	0	0	0	0.10316	3.04391	3.0414	2.9075	3.03243	4.48871	4.94833	1.52443	2.21332	1.55199	4.12471	3.58754	2.87555	2.02166	2.92311	2.32133	6.30468	5.99534	3.48815	BraA01g005300.3C	protein_coding	chrA01:2541140-2542249:-	gi|685257317|ref|XP_009125483.1|	1976	0	PREDICTED: F-box protein At3g17710-like [Brassica rapa]	gi|685257316|ref|XM_009127235.1|	1110	0	PREDICTED: Brassica rapa F-box protein At3g17710-like (LOC103850477), mRNA	Q9LUM6	214
BraA01g005310.3C	30.0748	31.18	30.561	21.5072	23.7979	19.8855	16.6311	19.551	16.1517	18.2985	14.261	18.4311	22.0492	21.2031	21.8316	22.8879	23.382	25.6412	34.002	40.3781	36.4877	24.8091	25.0809	24.2518	29.9897	29.9997	32.309	35.0223	32.6987	32.813	30.3547	29.1478	31.0887	30.7947	34.0712	28.1368	BraA01g005310.3C	protein_coding	chrA01:2542786-2546833:-	gi|923505015|ref|XP_013660971.1|	2942	0	PREDICTED: TOM1-like protein 2 isoform X1 [Brassica napus]	gi|923505014|ref|XM_013805517.1|	1956	0	PREDICTED: Brassica napus TOM1-like protein 2 (LOC106365959), transcript variant X1, mRNA	Q8L860	863
BraA01g005320.3C	0	0	0	0	0	0.185601	0.769203	0	0	0	0	0	0	0	0	0	0	0.257899	0	0	0	0	0	0	0	0	0	0	0	0	0	0	0	0	0	0	BraA01g005320.3C	protein_coding	chrA01:2547679-2548122:+	gi|685257323|ref|XP_009125520.1|	739	8e-96	PREDICTED: uncharacterized protein LOC103850510 [Brassica rapa]	gi|685257322|ref|XM_009127272.1|	425	0	PREDICTED: Brassica rapa uncharacterized LOC103850510 (LOC103850510), mRNA	.	.
BraA01g005330.3C	0.261857	1.17855	0.267285	0.338292	0.476349	0.639956	1.27511	0.891495	1.12407	0.485934	0.112972	0.372227	0.552866	0.280895	0.25767	1.98919	1.56935	0.615631	0.0531149	0	0	0.0558543	0.114476	0	0	0	0	0	0	0	0	0	0.0513078	0	0	0	BraA01g005330.3C	protein_coding	chrA01:2549031-2554657:+	gi|674957889|emb|CDX75281.1|	804	1e-101	BnaA01g04210D [Brassica napus]	gi|685257322|ref|XM_009127272.1|	515	0	PREDICTED: Brassica rapa uncharacterized LOC103850510 (LOC103850510), mRNA	.	.
BraA01g005340.3C	0.480118	0.939515	0.784115	0.738409	0.909784	1.1132	1.55863	1.25998	1.15706	2.6399	2.93443	3.08743	2.53422	1.92276	1.73229	3.15191	2.79023	2.09031	1.94774	1.84883	1.17828	1.19478	1.60919	1.13029	1.68175	1.31095	1.42343	3.12236	2.46269	2.36217	1.26308	1.32	1.22296	1.88585	1.21483	1.71651	BraA01g005340.3C	protein_coding	chrA01:2555126-2559366:-	gi|685257325|ref|XP_009125531.1|	4531	0	PREDICTED: myb-related protein 3R-1-like [Brassica rapa]	gi|685257326|ref|XM_009127290.1|	2739	0	PREDICTED: Brassica rapa myb-related protein 3R-1-like (LOC103850523), transcript variant X2, mRNA	Q9S7G7	921
BraA01g005350.3C	21.9664	34.2216	24.6907	45.1255	41.1043	39.1447	45.3331	35.0555	40.5453	28.5103	30.391	29.3399	38.7867	36.2569	41.2362	61.343	63.8473	53.1977	32.887	26.6324	25.7856	26.0071	26.7229	24.2777	30.0035	27.3399	21.2981	21.6446	22.7262	22.9015	21.8241	18.5962	19.0225	28.0812	20.6302	22.5483	BraA01g005350.3C	protein_coding	chrA01:2560871-2563123:-	gi|685257329|ref|XP_009125551.1|	1973	0	PREDICTED: la protein 1 [Brassica rapa]	gi|685257328|ref|XM_009127303.1|	1341	0	PREDICTED: Brassica rapa la protein 1 (LOC103850538), mRNA	Q93ZV7	629
BraA01g005360.3C	0.361897	0.531132	0.27705	0.876626	1.18294	1.10556	0.88113	0.86631	0.408821	1.1193	1.31737	1.19422	0.764085	0.970522	0.979306	0.509101	0.616167	0.768109	3.1198	1.3294	1.52255	1.6886	1.63155	2.00969	0.970138	1.26769	1.02927	2.22872	2.558	2.84884	1.92986	2.10474	1.81706	0.773794	0.490552	0.570817	BraA01g005360.3C	protein_coding	chrA01:2571247-2574351:-	gi|923556409|ref|XP_013738312.1|	2186	0	PREDICTED: proline-rich receptor-like protein kinase PERK14 [Brassica napus]	gi|685257333|ref|XM_009127336.1|	1561	0	PREDICTED: Brassica rapa proline-rich receptor-like protein kinase PERK14 (LOC103850563), mRNA	O65530	629
BraA01g005370.3C	1.30364	0.651039	1.28908	1.75434	1.42041	1.63384	0.97866	0.809057	0.859056	2.50599	2.59243	2.52321	1.26152	1.29645	1.18926	1.08888	1.33175	1.13514	0.564667	0.619244	0.457047	0.492411	0.519452	0.587813	0.553321	0.541542	0.617943	0.588748	0.805639	0.574575	0.289659	0.215391	0.372506	0.787178	0.618478	0.58545	BraA01g005370.3C	protein_coding	chrA01:2575383-2585692:-	gi|685257336|ref|XP_009125595.1|	10946	0	PREDICTED: helicase and polymerase-containing protein TEBICHI [Brassica rapa]	gi|685257335|ref|XM_009127347.1|	6391	0	PREDICTED: Brassica rapa helicase and polymerase-containing protein TEBICHI (LOC103850574), mRNA	Q588V7	3560
BraA01g005380.3C	6.49404	19.3061	7.64847	39.1824	42.5966	38.973	32.5958	30.5594	26.2405	47.8956	41.4869	46.4098	35.0687	39.1178	38.8329	82.9226	76.8871	72.7497	8.61279	5.56838	6.83031	10.6553	7.37051	7.11299	6.42778	7.80701	8.78276	17.9662	14.3552	16.4668	19.979	24.0345	21.0441	16.3775	7.04214	9.19243	BraA01g005380.3C	protein_coding	chrA01:2586713-2587558:-	gi|685257338|ref|XP_009125605.1|	569	2e-72	PREDICTED: two-on-two hemoglobin-3 [Brassica rapa]	gi|685257337|ref|XM_009127357.1|	351	0	PREDICTED: Brassica rapa two-on-two hemoglobin-3 (LOC103850586), mRNA	Q67XG0	204
BraA01g005390.3C	7.97938	6.89467	10.1546	7.65013	8.60088	6.62371	9.7896	4.63056	5.26792	5.66233	5.92383	4.10355	5.25105	8.00371	7.64787	4.95651	5.92832	6.22617	11.9814	13.0216	13.5153	12.5993	9.74023	11.2143	10.8896	10.2757	10.503	10.6195	9.51019	9.48319	17.0204	13.3687	11.2692	12.0142	7.5291	11.4416	BraA01g005390.3C	protein_coding	chrA01:2588519-2590171:+	gi|685257340|ref|XP_009125616.1|	1130	4e-153	PREDICTED: uncharacterized protein LOC103850595 [Brassica rapa]	gi|685257339|ref|XM_009127368.1|	846	0	PREDICTED: Brassica rapa uncharacterized LOC103850595 (LOC103850595), mRNA	.	.
BraA01g005400.3C	0.0350819	0.0686497	0.0716183	0.161865	0.0398863	0.0329759	0.136665	0.261268	0.317045	0.289343	0.113515	0.0356205	0.222208	0.188162	0.034521	0	0.0477844	0.137464	0	0	0.0737968	0.037415	0.038342	0	0	0.0756237	0.0362821	0.0691359	0	0.0690408	0	0.0370966	0	0.300043	0.570642	0.0737791	BraA01g005400.3C	protein_coding	chrA01:2590855-2594096:+	gi|685257342|ref|XP_009125629.1|	4127	0	PREDICTED: probable E3 ubiquitin ligase SUD1 isoform X1 [Brassica rapa]	gi|685257341|ref|XM_009127381.1|	2499	0	PREDICTED: Brassica rapa probable E3 ubiquitin ligase SUD1 (LOC103850604), transcript variant X1, mRNA	F4JKK0	204
BraA01g005410.3C	0	0.0639655	0	0.0301641	0	0	0.06367	0	0	0.0674002	0.211539	0.06638	0.172539	0.175324	0.0321655	0.0919685	0.133572	0.0853895	0.0331523	0	0.103142	0	0.0357258	0.0372358	0.0701017	0.0352318	0.067613	0.0644186	0.0909048	0.289485	0.0348627	0.0345654	0.192146	0.18638	0.425364	0.240607	BraA01g005410.3C	protein_coding	chrA01:2594619-2598082:+	gi|685257354|ref|XP_009125684.1|	4034	0	PREDICTED: probable E3 ubiquitin ligase SUD1 [Brassica rapa]	gi|685257353|ref|XM_009127436.1|	1479	0	PREDICTED: Brassica rapa probable E3 ubiquitin ligase SUD1 (LOC103850648), mRNA	F4JKK0	186
BraA01g005420.3C	18.0173	23.7197	17.2694	25.5474	26.2305	23.3382	22.1122	21.6623	24.4903	18.4241	17.3	16.8066	17.8605	18.463	18.0896	36.0613	35.5147	28.3159	40.5574	45.5709	46.2201	47.3359	51.3904	59.9866	23.639	24.3926	22.1938	23.0938	22.8802	22.9179	29.9956	28.2682	26.3336	38.5587	41.3792	42.8974	BraA01g005420.3C	protein_coding	chrA01:2598507-2601139:-	gi|685257346|ref|XP_009125648.1|	2141	0	PREDICTED: serine/threonine-protein kinase AFC3 isoform X1 [Brassica rapa]	gi|923865007|ref|XM_013852295.1|	1197	0	PREDICTED: Brassica napus serine/threonine-protein kinase AFC3-like (LOC106411516), transcript variant X3, mRNA	P51568	761
BraA01g005430.3C	3.46716	1.67414	3.53904	1.03878	0.76792	0.846499	1.5787	2.05995	1.42426	10.5378	10.1988	10.104	4.27811	4.63697	5.22836	0.760122	0.30666	1.29387	9.49881	3.01156	4.73596	3.02543	2.11614	1.94911	9.41512	7.71658	7.21813	22.4061	19.4511	21.2232	4.51422	5.71367	5.33775	3.89388	2.83205	3.78786	BraA01g005430.3C	protein_coding	chrA01:2603103-2606797:+	gi|685257356|ref|XP_009125694.1|	3190	0	PREDICTED: potassium channel KAT3 isoform X1 [Brassica rapa]	gi|685257355|ref|XM_009127446.1|	1921	0	PREDICTED: Brassica rapa potassium channel KAT3 (LOC103850658), transcript variant X1, mRNA	P92960	1032
BraA01g005440.3C	35.7262	20.4233	32.0962	43.7345	41.1361	39.0904	26.5319	29.0979	27.2382	41.081	39.0238	40.7037	50.456	46.2754	49.059	37.1947	37.6903	41.4547	19.4873	18.7933	19.3088	20.4068	19.4792	19.0526	25.252	31.6703	27.7875	23.3631	23.8151	21.514	25.1165	24.6193	24.2514	37.4344	24.6668	25.4949	BraA01g005440.3C	protein_coding	chrA01:2607730-2615185:-	gi|685257360|ref|XP_009125713.1|	4771	0	PREDICTED: protein transport protein Sec24-like At4g32640 [Brassica rapa]	gi|685257359|ref|XM_009127465.1|	3276	0	PREDICTED: Brassica rapa protein transport protein Sec24-like At4g32640 (LOC103850674), mRNA	Q9M081	1508
BraA01g005450.3C	0	0	0.0485025	0	0	0	0	0	0.0536785	0.0979768	0.0512508	0	0	0	0	0	0	0	0	0	0.0999557	0	0	0	0	0	0	0	0.0880963	0.0467569	0	0	0	0	0.0515279	0	BraA01g005450.3C	protein_coding	chrA01:2616341-2619475:-	gi|685257362|ref|XP_009125724.1|	3083	0	PREDICTED: probable ADP-ribosylation factor GTPase-activating protein AGD14 [Brassica rapa]	gi|685257363|ref|XM_009127482.1|	1845	0	PREDICTED: Brassica rapa probable ADP-ribosylation factor GTPase-activating protein AGD14 (LOC103850686), transcript variant X2, mRNA	Q8RXE7	198
BraA01g005460.3C	0	0	0	0	0	0	0	0	0	0	0	0	0	0	0	0	0	0	0.0796724	0.23882	0	0	0.0858572	0	0	0.08467	0	0.232219	0.0728216	0.309199	0	0	0	0	0.170374	0.16521	BraA01g005460.3C	protein_coding	chrA01:2633779-2635258:+	gi|685257370|ref|XP_009125758.1|	1779	0	PREDICTED: uncharacterized protein LOC103850720 isoform X1 [Brassica rapa]	gi|685257369|ref|XM_009127510.1|	1116	0	PREDICTED: Brassica rapa uncharacterized LOC103850720 (LOC103850720), transcript variant X1, mRNA	F4HWL3	77.8
BraA01g005470.3C	41.7069	67.2712	39.9651	45.5554	45.5907	45.0703	51.4868	41.857	43.3754	29.5429	26.9291	27.2712	38.9368	35.4058	39.365	63.0618	61.8321	54.5979	21.9648	26.7385	22.8782	20.3743	16.1245	17.0215	19.2677	23.3426	20.7355	13.2327	13.8517	12.9353	12.2047	14.2007	16.3069	34.6908	21.4341	21.6793	BraA01g005470.3C	protein_coding	chrA01:2657327-2658869:+	gi|923848222|ref|XP_013703138.1|	589	1e-70	PREDICTED: claspin homolog [Brassica napus]	gi|685257376|ref|XM_009127537.1|	927	0	PREDICTED: Brassica rapa nucleolin (LOC103850752), mRNA	.	.
BraA01g005480.3C	3.84516	6.1449	4.9715	7.68787	11.5123	9.1563	14.6047	12.6818	10.5697	8.19267	8.29454	8.06866	14.0719	11.8242	17.1527	21.6368	24.7905	10.7141	38.0876	32.4711	34.6458	33.3538	29.1372	31.6827	28.5867	23.2085	24.9207	29.3003	28.2778	26.3592	30.3471	25.3446	28.8809	27.0398	27.52	32.3463	BraA01g005480.3C	protein_coding	chrA01:2659529-2660824:+	gi|685257379|ref|XP_009125792.1|	1042	2e-141	PREDICTED: uncharacterized protein At2g39795, mitochondrial [Brassica rapa]	gi|685257378|ref|XM_009127544.1|	684	0	PREDICTED: Brassica rapa uncharacterized protein At2g39795, mitochondrial (LOC103850755), mRNA	O94675	57.8
BraA01g005490.3C	51.4539	39.3713	46.8646	35.0019	34.4253	35.2197	33.5358	35.8633	34.4282	22.0348	23.4794	23.6437	24.7217	27.8097	23.7578	23.1997	21.834	26.7959	35.1911	48.5316	50.441	42.3529	41.7441	39.8263	34.9429	40.1003	36.9089	22.7501	22.381	24.7959	33.2779	31.6687	29.793	30.3408	34.7656	36.3476	BraA01g005490.3C	protein_coding	chrA01:2661495-2662987:-	gi|685257381|ref|XP_009125802.1|	1787	0	PREDICTED: E3 ubiquitin-protein ligase At1g63170 [Brassica rapa]	gi|685257380|ref|XM_009127554.1|	684	0	PREDICTED: Brassica rapa E3 ubiquitin-protein ligase At1g63170 (LOC103850765), mRNA	Q9LN71	117
BraA01g005500.3C	7.21985	21.1922	8.77324	4.91746	5.86329	4.52429	6.36176	6.40107	5.63151	4.25335	4.26437	4.53805	3.6294	4.60998	4.90543	16.444	14.751	11.0017	6.10196	8.1873	7.23209	4.4	8.26654	8.22429	3.13354	1.85278	1.42226	3.72643	4.46182	4.0596	2.20004	4.36256	3.1998	10.6182	8.76125	7.41111	BraA01g005500.3C	protein_coding	chrA01:2664198-2665226:-	gi|674957865|emb|CDX75257.1|	728	8e-96	BnaA01g04450D [Brassica napus]	gi|923505066|ref|XM_013807140.1|	495	0	PREDICTED: Brassica napus photosynthetic NDH subunit of subcomplex B 3, chloroplastic-like (LOC106367345), mRNA	Q9LU21	93.2
BraA01g005510.3C	0.762344	1.8233	0.432305	1.71962	1.63719	1.1943	1.31991	2.07273	2.67926	1.65922	2.55808	2.32214	1.16246	0.81777	1.33361	1.54907	1.846	2.32334	3.86584	3.26179	3.20727	2.98116	2.49957	3.08766	1.63489	1.36945	1.13884	2.50392	2.6697	2.25043	1.8068	2.59751	1.0788	2.73681	2.84748	2.40488	BraA01g005510.3C	protein_coding	chrA01:2666553-2668459:+	gi|685257385|ref|XP_009125824.1|	1635	0	PREDICTED: protein TIFY 8 [Brassica rapa]	gi|685257384|ref|XM_009127576.1|	1035	0	PREDICTED: Brassica rapa protein TIFY 8 (LOC103850786), mRNA	Q84MB2	411
BraA01g005520.3C	4.93504	3.88178	5.9263	4.37539	4.95079	4.63879	6.31408	2.059	1.85831	3.39188	3.966	4.32305	4.29039	3.63303	4.09439	4.21989	3.42687	5.05551	7.65488	8.04079	9.26163	6.08886	4.65335	5.40116	7.26318	4.06753	5.70434	5.14879	3.31893	3.61824	4.64413	6.44633	6.44643	8.27601	4.72197	4.17182	BraA01g005520.3C	protein_coding	chrA01:2669640-2671671:-	gi|685257387|ref|XP_009125835.1|	1463	0	PREDICTED: coiled-coil domain-containing protein 93 [Brassica rapa]	gi|685257386|ref|XM_009127587.1|	906	0	PREDICTED: Brassica rapa coiled-coil domain-containing protein 93 (LOC103850796), mRNA	Q567U6	92.8
BraA01g005530.3C	14.5752	11.5224	15.6194	14.6573	15.0423	14.3153	8.63727	9.70624	9.40275	17.3498	18.4254	16.755	12.1251	12.6717	13.4481	20.4016	18.3179	15.2392	27.2051	23.794	22.7847	16.3586	15.4927	14.3258	15.317	14.6517	14.059	22.2768	24.8322	22.9615	15.5061	13.1831	13.5671	10.9494	12.3369	12.3451	BraA01g005530.3C	protein_coding	chrA01:2672476-2677376:-	gi|685257393|ref|XP_009125860.1|	3208	0	PREDICTED: transcriptional corepressor LEUNIG isoform X3 [Brassica rapa]	gi|922417284|ref|XM_013748316.1|	1893	0	PREDICTED: Brassica oleracea var. oleracea transcriptional corepressor LEUNIG (LOC106311069), transcript variant X3, mRNA	Q9FUY2	1050
BraA01g005540.3C	0.906686	0.27296	0.925483	0.128719	0.396484	0.262233	0.203774	0.371013	0.47273	0.215713	0.15045	0.212448	0.441765	0	0.13726	0	0.0949986	0.0910957	1.06103	1.97895	2.12734	1.19014	0.990944	0.794482	1.57051	1.80414	1.37049	0.343617	0.711183	0.686289	1.19016	1.10626	1.09326	0.927896	1.89079	1.10008	BraA01g005540.3C	protein_coding	chrA01:2684541-2686463:-	gi|685257395|ref|XP_009125871.1|	2223	0	PREDICTED: probable indole-3-pyruvate monooxygenase YUCCA1 [Brassica rapa]	gi|923520526|ref|XM_013811324.1|	1254	0	PREDICTED: Brassica napus probable indole-3-pyruvate monooxygenase YUCCA1 (LOC106371275), mRNA	Q9SZY8	753
BraA01g005550.3C	0	0	0	0	0	0	0	0	0	0	0	0	0	0	0	0	0	0	0.0651387	0	0.135105	0.0684982	0.0701954	0	0.0688691	0.138449	0.132848	0	0	0	0.136999	0	0.125845	0	0.0696476	0	BraA01g005550.3C	protein_coding	chrA01:2693451-2695530:-	gi|685257397|ref|XP_009125885.1|	2325	0	PREDICTED: protein ECERIFERUM 26 [Brassica rapa]	gi|685257396|ref|XM_009127637.1|	1365	0	PREDICTED: Brassica rapa protein ECERIFERUM 26 (LOC103850841), mRNA	Q9SVM9	90.1
BraA01g005560.3C	20.8503	16.5451	19.2716	31.5116	25.9456	26.543	22.7044	11.8774	10.3859	32.4975	35.2378	34.6727	31.1966	36.8073	33.4409	41.8028	32.4249	39.6701	79.59	77.3615	72.524	66.1854	49.5232	53.2995	83.2678	79.6279	76.4065	73.4437	74.116	68.6578	86.498	90.7947	83.3158	74.731	64.0914	58.5232	BraA01g005560.3C	protein_coding	chrA01:2696198-2697365:+	gi|567217676|ref|XP_006412467.1|	745	4e-98	hypothetical protein EUTSA_v10026373mg [Eutrema salsugineum]	gi|685257398|ref|XM_009127647.1|	531	0	PREDICTED: Brassica rapa V-type proton ATPase subunit c'' (LOC103850851), mRNA	Q9SLA2	282
BraA01g005570.3C	6.52068	7.64658	5.77494	9.93277	10.2483	10.5684	10.5063	10.3806	11.645	11.1713	12.1268	9.8825	11.6921	11.5465	11.2523	15.6143	16.9144	13.4641	8.99598	7.87106	7.31218	8.89746	11.1092	9.9129	6.86346	7.364	7.0165	7.84247	8.15578	7.14759	5.06245	5.37416	4.72074	9.36318	8.0329	8.01626	BraA01g005570.3C	protein_coding	chrA01:2698374-2704595:+	gi|674957858|emb|CDX75250.1|	6074	0	BnaA01g04520D [Brassica napus]	gi|685257404|ref|XM_009127674.1|	2027	0	PREDICTED: Brassica rapa probable boron transporter 7 (LOC103850870), transcript variant X2, mRNA	Q9SUU1	1122
BraA01g005580.3C	0.198572	0.291431	0.168907	0.244319	0.188139	0.21776	0.354548	0.176053	0.224319	0.272959	0.142783	0.235224	0.838503	0.603526	1.04212	0.512128	0.540943	0.432266	0.302087	0.201225	0.34809	0.247075	0.180854	0.0753993	0.390362	0.642073	0.821464	0.717432	0.521544	0.488485	0.211782	0.384956	0.389079	0.849158	0.610106	0.313206	BraA01g005580.3C	protein_coding	chrA01:2705237-2709081:-	gi|685257407|ref|XP_009125933.1|	4556	0	PREDICTED: probable potassium channel AKT5 [Brassica rapa]	gi|685257406|ref|XM_009127685.1|	2550	0	PREDICTED: Brassica rapa probable potassium channel AKT5 (LOC103850886), mRNA	Q9SCX5	1534
BraA01g005590.3C	69.613	124.599	77.604	151.496	156.672	144.268	107.826	115.769	119.435	104.835	109.677	113.621	135.188	146.8	140.507	244.988	236.561	274.321	120.962	118.695	104.954	108.45	102.308	100.137	118.208	97.5647	106.886	102.305	100.21	90.007	108.705	109.788	114.519	88.0532	79.8682	76.6975	BraA01g005590.3C	protein_coding	chrA01:2712330-2713691:+	gi|685257410|ref|XP_009125952.1|	551	2e-70	PREDICTED: cytochrome b-c1 complex subunit 7-1 [Brassica rapa]	gi|685257409|ref|XM_009127704.1|	369	0	PREDICTED: Brassica rapa cytochrome b-c1 complex subunit 7-1 (LOC103850902), mRNA	Q9SUU5	199
BraA01g005600.3C	3.78372	9.76717	3.86216	8.09744	7.78003	7.56719	5.40985	8.56498	8.27581	8.96367	9.37763	11.8524	6.28897	6.56319	5.78288	2.26501	2.41239	4.94201	7.42994	4.24217	5.58843	3.5202	4.48728	2.75114	1.64015	2.256	2.74755	3.96627	4.62688	3.8816	4.5506	2.72409	3.47027	4.05466	3.92847	2.8782	BraA01g005600.3C	protein_coding	chrA01:2718051-2720330:+	gi|685257412|ref|XP_009125963.1|	1938	0	PREDICTED: uncharacterized protein LOC103850912 [Brassica rapa]	gi|685257411|ref|XM_009127715.1|	1089	0	PREDICTED: Brassica rapa uncharacterized LOC103850912 (LOC103850912), mRNA	.	.
BraA01g005610.3C	4.20637	7.03984	4.06759	2.91118	1.82488	2.70527	2.91073	3.76859	3.18869	3.19538	2.6863	3.428	2.16183	1.8405	2.34187	6.92951	7.46333	7.08442	2.46984	2.69215	2.91064	1.29861	2.23814	2.52188	1.00891	0.596539	0.744127	2.89042	3.02706	2.72306	1.18058	1.22903	1.46402	3.62911	1.92058	1.33857	BraA01g005610.3C	protein_coding	chrA01:2720874-2722457:-	gi|685257416|ref|XP_009125984.1|	2842	0	PREDICTED: pentatricopeptide repeat-containing protein At4g32450, mitochondrial [Brassica rapa]	gi|685257415|ref|XM_009127736.1|	1584	0	PREDICTED: Brassica rapa pentatricopeptide repeat-containing protein At4g32450, mitochondrial (LOC103850933), mRNA	Q9SUU7	731
BraA01g005620.3C	25.3761	20.9196	24.4674	12.0155	12.6172	12.1002	15.1309	18.1823	19.7238	17.0852	16.5975	16.451	10.6217	14.1264	13.104	9.15866	8.76705	12.3687	22.51	27.9643	31.2033	16.0173	15.0396	16.0123	13.2481	16.9049	15.5323	19.9743	21.123	20.3836	12.7036	12.2041	13.9887	21.5837	20.6986	17.815	BraA01g005620.3C	protein_coding	chrA01:2723387-2725560:-	gi|685257414|ref|XP_009125972.1|	1837	0	PREDICTED: LOW QUALITY PROTEIN: uncharacterized protein LOC103850924 [Brassica rapa]	gi|685257413|ref|XM_009127724.1|	1070	0	PREDICTED: Brassica rapa uncharacterized LOC103850924 (LOC103850924), mRNA	.	.
BraA01g005630.3C	0.567074	0.591826	0.887539	1.15123	1.71929	1.52802	1.43591	1.44796	2.00722	0.896431	0.815505	1.0364	1.11746	1.17605	1.22762	2.60593	2.67766	1.82698	1.03523	0.91944	1.15311	1.49181	1.48745	1.29193	2.14848	2.11883	2.3068	1.26654	1.3317	1.41359	0.685439	0.879472	0.592595	2.08369	2.25476	1.62987	BraA01g005630.3C	protein_coding	chrA01:2729338-2731656:-	gi|685257418|ref|XP_009125997.1|	4052	0	PREDICTED: pentatricopeptide repeat-containing protein At4g32430, mitochondrial [Brassica rapa]	gi|199579999|gb|AC232479.1|	2319	0	Brassica rapa subsp. pekinensis clone KBrB035P03, complete sequence	Q84MA3	1265
BraA01g005640.3C	3.14651	3.5404	3.81394	5.7708	6.17106	5.02795	9.23147	4.35189	4.88742	4.78478	4.96333	4.83216	5.85443	5.73796	5.10873	9.35071	7.44658	4.98305	4.38788	4.22483	4.34363	6.96322	8.08144	7.52694	5.48265	4.70551	5.57275	4.92191	5.25021	5.57307	2.64272	4.07583	4.12299	16.5951	8.87139	7.98209	BraA01g005640.3C	protein_coding	chrA01:2732258-2736512:+	gi|923755712|ref|XP_013675686.1|	871	9e-102	PREDICTED: peptidyl-prolyl cis-trans isomerase CYP95-like isoform X1 [Brassica napus]	gi|923832890|ref|XM_013842741.1|	1278	0	PREDICTED: Brassica napus peptidyl-prolyl cis-trans isomerase CYP95-like (LOC106402091), mRNA	Q8RWY7	300
BraA01g005650.3C	120.037	33.1128	116.665	137.861	138.061	134.698	64.5353	68.464	74.9184	131.841	133.124	128.708	156.068	156.475	156.208	98.9868	98.5615	101.653	118.192	95.0185	101.094	117.174	134.687	142.871	194.755	180.822	183.967	97.537	99.7932	100.066	170.56	167.862	169.234	130.124	134.377	129.729	BraA01g005650.3C	protein_coding	chrA01:2737326-2742204:+	gi|685257430|ref|XP_009126053.1|	5533	0	PREDICTED: cellulose synthase A catalytic subunit 1 [UDP-forming] [Brassica rapa]	gi|685257429|ref|XM_009127805.1|	2902	0	PREDICTED: Brassica rapa cellulose synthase A catalytic subunit 1 [UDP-forming] (LOC103850985), mRNA	O48946	1993
BraA01g005660.3C	26.4764	14.7815	26.8695	35.2046	39.5581	32.9196	47.2608	39.371	44.6485	25.8014	24.6064	23.2417	38.5825	43.134	42.4958	48.1941	48.9501	38.2688	21.1259	22.6548	21.989	32.5501	37.6095	35.6355	32.2354	32.4841	34.5631	24.9608	23.7653	24.3258	32.9576	32.273	31.5451	32.3386	32.7653	28.322	BraA01g005660.3C	protein_coding	chrA01:2742718-2744219:-	gi|685257432|ref|XP_009126062.1|	1802	0	PREDICTED: adenine nucleotide transporter BT1, chloroplastic/mitochondrial [Brassica rapa]	gi|685257431|ref|XM_009127814.1|	1149	0	PREDICTED: Brassica rapa adenine nucleotide transporter BT1, chloroplastic/mitochondrial (LOC103850995), mRNA	Q9SUV1	587
BraA01g005670.3C	69.073	57.3476	69.4881	101.508	93.2574	105.896	76.9727	74.6358	76.0596	106.218	104.676	103.683	132.339	130.913	129.239	165.257	161.027	161.351	80.1576	73.5293	75.9678	101.026	87.1061	90.7876	120.535	113.909	110.846	113.79	114.438	120.332	104.393	103.327	101.912	151.555	148.095	153.383	BraA01g005670.3C	protein_coding	chrA01:2746081-2747136:-	gi|674957848|emb|CDX75240.1|	1672	0	BnaA01g04620D [Brassica napus]	gi|199579999|gb|AC232479.1|	1056	0	Brassica rapa subsp. pekinensis clone KBrB035P03, complete sequence	Q9SUV2	616
BraA01g005680.3C	0	0	0	0	0	0	0	0	0	0	0	0	0	0	0	0	0	0	0	0	0	0	0	0	0	0	0.0837203	0	0	0	0	0	0	0	0	0.0851218	BraA01g005680.3C	protein_coding	chrA01:2748343-2749425:-	gi|685257436|ref|XP_009126084.1|	1851	0	PREDICTED: probable F-box protein At5g47300 [Brassica rapa]	gi|685257435|ref|XM_009127836.1|	1083	0	PREDICTED: Brassica rapa probable F-box protein At5g47300 (LOC103851017), mRNA	Q9LVS9	260
BraA01g005690.3C	0.074549	0.218821	0	0	0	0	0	0.0793135	0.252645	0.153714	0	0.0756935	0.236096	0	0	0.209744	0.101542	0.19474	0.30243	0	0.156818	0	0.162954	0	0	0	0.0770995	0.440742	0.552849	0.220068	0.159017	0	0.0730351	0.141687	0.161682	0.235171	BraA01g005690.3C	protein_coding	chrA01:2750142-2752344:-	gi|685257438|ref|XP_009126095.1|	1944	0	PREDICTED: probable polygalacturonase At3g15720 isoform X1 [Brassica rapa]	gi|923520535|ref|XM_013811361.1|	1158	0	PREDICTED: Brassica napus probable polygalacturonase At3g15720 (LOC106371307), mRNA	Q9LW07	251
BraA01g005700.3C	8.41554	3.936	8.82599	15.0194	14.1418	13.5171	8.6012	8.36306	7.57402	12.013	9.82483	11.08	9.17688	8.23377	8.69049	9.36682	11.7776	9.66307	10.1764	9.04341	7.58683	15.1888	15.9694	17.2238	12.0979	10.2665	11.5727	9.24906	8.35835	9.32733	9.66581	10.4635	11.9593	17.1369	16.597	14.7324	BraA01g005700.3C	protein_coding	chrA01:2753419-2755987:-	gi|685257444|ref|XP_009126121.1|	3037	0	PREDICTED: uncharacterized protein LOC103851047 [Brassica rapa]	gi|685257443|ref|XM_009127873.1|	1896	0	PREDICTED: Brassica rapa uncharacterized LOC103851047 (LOC103851047), mRNA	.	.
BraA01g005710.3C	2.69933	4.93768	2.6355	4.0071	5.3374	7.28091	2.05739	1.49836	2.25385	4.47683	2.91142	3.93241	2.97349	3.39916	2.30972	7.7597	7.833	6.43816	3.92794	3.68684	4.32038	4.50603	6.92651	7.75401	3.77535	2.5299	2.1848	3.81622	4.35175	3.46452	2.62857	4.71588	3.56435	3.68044	4.07256	4.93638	BraA01g005710.3C	protein_coding	chrA01:2757093-2758514:+	gi|685257446|ref|XP_009126132.1|	977	6e-131	PREDICTED: uncharacterized protein LOC103851057 [Brassica rapa]	gi|685257445|ref|XM_009127884.1|	747	0	PREDICTED: Brassica rapa uncharacterized LOC103851057 (LOC103851057), mRNA	.	.
BraA01g005720.3C	14.2387	23.4181	15.6412	22.587	18.0388	19.0562	23.508	18.2506	17.77	16.7765	18.1364	18.9322	16.8923	17.8923	19.0817	47.2144	40.3585	31.7928	25.6497	19.5821	22.5353	29.0696	35.7923	36.3782	19.412	13.3005	14.3752	26.8576	27.7182	26.3536	22.8512	20.2903	17.9351	25.1289	23.6018	27.6632	BraA01g005720.3C	protein_coding	chrA01:2759370-2761351:-	gi|685257448|ref|XP_009126143.1|	1867	0	PREDICTED: serine/arginine repetitive matrix protein 1-like isoform X1 [Brassica rapa]	gi|685257451|ref|XM_009127908.1|	1293	0	PREDICTED: Brassica rapa serine/arginine repetitive matrix protein 1-like (LOC103851066), transcript variant X3, mRNA	Q94C48	524
BraA01g005730.3C	0	0	0	0	0	0	0.0897808	0.0980785	0	0.0475203	0	0.046801	0	0.0494446	0	0.0648421	0	0	0	0.140128	0	0	0.15113	0.105012	0.049425	0.0496802	0.0476704	0.136254	0.213641	0.0907113	0.0983195	0.194962	0.0451573	0.39422	0.149951	0.484684	BraA01g005730.3C	protein_coding	chrA01:2765296-2767740:-	gi|685257457|ref|XP_009126183.1|	2456	0	PREDICTED: G-type lectin S-receptor-like serine/threonine-protein kinase SD2-5 [Brassica rapa]	gi|199579999|gb|AC232479.1|	1455	0	Brassica rapa subsp. pekinensis clone KBrB035P03, complete sequence	Q8RWZ5	643
BraA01g005740.3C	17.1901	18.8787	17.3316	10.2622	11.0086	10.7501	14.3157	14.4071	14.1878	8.71647	8.74063	7.90774	8.29578	8.95653	7.35297	7.30404	6.35533	12.4176	14.232	19.3395	22.6187	16.3129	15.4518	16.4646	13.0157	15.465	14.912	9.33335	10.4716	9.97639	10.7757	10.2016	10.2765	61.5421	54.4012	38.6971	BraA01g005740.3C	protein_coding	chrA01:2768665-2771163:-	gi|923505154|ref|XP_013665094.1|	3894	0	PREDICTED: G-type lectin S-receptor-like serine/threonine-protein kinase SD2-5 [Brassica napus]	gi|199579999|gb|AC232479.1|	2499	0	Brassica rapa subsp. pekinensis clone KBrB035P03, complete sequence	Q8RWZ5	1228
BraA01g005750.3C	0.852343	2.14444	0.124288	2.35959	3.04565	1.83126	4.0319	4.01591	2.20082	1.88299	2.23261	2.96718	3.7277	3.52663	2.75578	3.9397	4.14629	6.36152	4.81619	2.96136	2.8175	7.27223	5.19007	6.65776	2.48072	2.62477	2.51858	2.27961	1.6931	2.51611	4.41537	6.18029	7.87318	5.3227	4.62141	4.73738	BraA01g005750.3C	protein_coding	chrA01:2781493-2782759:-	gi|685257463|ref|XP_009126211.1|	1169	4e-160	PREDICTED: uncharacterized protein LOC103851128 [Brassica rapa]	gi|685257462|ref|XM_009127963.1|	697	0	PREDICTED: Brassica rapa uncharacterized LOC103851128 (LOC103851128), mRNA	.	.
BraA01g005760.3C	0.0781369	0.0764508	0	0	0.0888378	0	0.30439	0	0.176536	0	0.0842761	0	0	0.335271	0.0768877	0.10992	0.106429	0	0.158493	0.158362	0	0	0.341592	0	0.167569	0	0.0808102	0	0.0724321	0	0.16667	0	0.1531	0.074253	0	0	BraA01g005760.3C	protein_coding	chrA01:2784357-2785478:+	gi|685257465|ref|XP_009126222.1|	1900	0	PREDICTED: uncharacterized protein LOC103851139 [Brassica rapa]	gi|685257464|ref|XM_009127974.1|	1122	0	PREDICTED: Brassica rapa uncharacterized LOC103851139 (LOC103851139), mRNA	.	.
BraA01g005770.3C	65.9383	38.5636	71.4377	91.2058	89.4121	84.6375	64.6706	65.6968	61.3461	75.4636	77.5936	87.2201	131.947	128.037	127.845	92.5628	89.7501	108.369	65.034	64.1314	67.0034	86.9987	79.0844	87.3036	127.587	133.964	132.009	81.0206	87.7825	80.0392	117.721	116.865	110.507	106.749	113.336	105.888	BraA01g005770.3C	protein_coding	chrA01:2786525-2788408:-	gi|685257467|ref|XP_009126233.1|	2805	0	PREDICTED: probable clathrin assembly protein At4g32285 [Brassica rapa]	gi|685257466|ref|XM_009127985.1|	1884	0	PREDICTED: Brassica rapa probable clathrin assembly protein At4g32285 (LOC103851149), mRNA	Q8S9J8	939
BraA01g005780.3C	0	0	0	0.232472	0	0	0	0	0.142294	0.259723	0.135859	0.127896	0.664869	0.27024	0.123948	0.531594	0.171571	0.329044	0.12775	0.51058	0.132484	0.403018	0	0.143486	0.270133	0	0	0.124117	0	0.495784	0	0.266392	0.246808	0.239402	0	0.132453	BraA01g005780.3C	protein_coding	chrA01:2790495-2791531:-	gi|685257469|ref|XP_009126243.1|	1246	2e-172	PREDICTED: auxin-responsive protein IAA29 isoform X1 [Brassica rapa]	gi|685257468|ref|XM_009127995.1|	696	0	PREDICTED: Brassica rapa auxin-responsive protein IAA29 (LOC103851160), transcript variant X1, mRNA	Q93WC4	293
BraA01g005790.3C	0	0	0	0	0	0	0	0	0	0	0	0	0	0	0	0	0	0	0	0.171177	0	0	0	0	0	0	0	0	0.156587	0.332433	0	0	0	0	0	0	BraA01g005790.3C	protein_coding	chrA01:2797075-2797999:+	gi|567217736|ref|XP_006412497.1|	442	2e-50	hypothetical protein EUTSA_v10025618mg [Eutrema salsugineum]	gi|199579999|gb|AC232479.1|	260	1e-132	Brassica rapa subsp. pekinensis clone KBrB035P03, complete sequence	A8MRY9	170
BraA01g005800.3C	2.64572	6.58924	3.31434	5.9926	5.46919	4.97379	5.97319	3.96633	4.619	7.93491	5.18835	6.22742	3.55472	5.93416	4.26015	8.79718	7.37119	8.16788	3.65903	3.16854	3.41515	3.976	4.60025	4.5207	2.83695	3.37008	3.10936	3.55495	4.01328	4.14174	4.2326	5.21382	7.18689	2.28565	2.21697	2.40268	BraA01g005800.3C	protein_coding	chrA01:2798741-2799842:+	gi|923505175|ref|XP_013665596.1|	1136	3e-155	PREDICTED: uncharacterized protein LOC106370040 [Brassica napus]	gi|685257478|ref|XM_009128040.1|	700	0	PREDICTED: Brassica rapa uncharacterized LOC103851195 (LOC103851195), mRNA	Q84WS8	64.3
BraA01g005810.3C	15.4683	17.556	15.6432	16.5577	15.2598	15.9266	11.2173	11.9502	10.2155	14.4751	15.965	13.9661	11.7571	10.211	11.5211	21.0236	20.8098	17.3439	21.0942	26.2857	24.6292	16.9031	15.8654	15.0179	10.9725	12.0038	10.8291	15.4293	14.4713	17.3751	13.0456	12.3304	14.548	12.4832	11.1481	12.712	BraA01g005810.3C	protein_coding	chrA01:2800093-2802143:-	gi|685257473|ref|XP_009126259.1|	3005	0	PREDICTED: E3 ubiquitin-protein ligase KEG [Brassica rapa]	gi|923505170|ref|XM_013810008.1|	1842	0	PREDICTED: Brassica napus E3 ubiquitin-protein ligase KEG-like (LOC106369720), transcript variant X4, mRNA	Q9FY48	125
BraA01g005820.3C	7.67313	10.0633	9.16534	8.73781	12.0651	11.0489	6.51889	8.16353	9.40574	10.0987	10.389	11.1062	11.2025	10.1574	7.7111	21.3588	25.5727	18.3382	18.5445	17.5366	14.5955	15.4963	13.9175	12.832	10.3284	6.51061	6.5849	10.1346	11.6531	9.47807	14.9742	19.6803	12.3156	8.37773	12.2156	13.2186	BraA01g005820.3C	protein_coding	chrA01:2804238-2804774:-	gi|685257481|ref|XP_009126300.1|	456	7e-54	PREDICTED: ATP synthase subunit b', chloroplastic [Brassica rapa]	gi|199579999|gb|AC232479.1|	537	0	Brassica rapa subsp. pekinensis clone KBrB035P03, complete sequence	P31853	133
BraA01g005830.3C	6.6663	3.48875	5.93416	11.6951	10.5316	10.7471	5.92613	3.50494	4.50964	4.99467	3.67864	4.01396	5.64627	7.15097	5.68255	3.32587	4.32886	4.80911	6.32856	8.32638	6.35925	6.65496	6.81984	5.1655	3.90654	4.92928	5.49145	3.78079	4.20356	3.81373	6.44841	5.1639	5.6576	9.87072	6.38836	4.76829	BraA01g005830.3C	protein_coding	chrA01:2805785-2808306:-	gi|685257483|ref|XP_009126311.1|	3105	0	PREDICTED: coiled-coil domain-containing protein 18 [Brassica rapa]	gi|685257484|ref|XM_009128069.1|	2262	0	PREDICTED: Brassica rapa coiled-coil domain-containing protein 18 (LOC103851214), transcript variant X2, mRNA	.	.
BraA01g005840.3C	21.9094	19.7418	21.5123	17.4351	16.5215	17.0964	12.3089	12.3544	12.6106	18.9498	16.4689	18.6955	16.3901	15.347	15.467	16.0198	17.3462	16.5497	18.9346	20.0892	20.7158	14.2662	13.6731	13.6663	12.2452	15.351	13.4361	18.4592	17.247	17.4869	14.1638	13.3646	14.6134	13.5652	14.0882	12.7841	BraA01g005840.3C	protein_coding	chrA01:2809509-2814225:+	gi|685257489|ref|XP_009126332.1|	4663	0	PREDICTED: pantothenate kinase 2 [Brassica rapa]	gi|685257488|ref|XM_009128084.1|	2733	0	PREDICTED: Brassica rapa pantothenate kinase 2 (LOC103851237), mRNA	Q8L5Y9	1675
BraA01g005850.3C	38.6279	36.2936	35.6795	30.9894	28.6362	26.8998	24.6474	29.1155	25.1696	22.0966	23.0735	24.7539	19.9417	18.2285	17.6349	21.2363	25.2351	21.4569	27.5094	31.8224	34.4723	28.8421	29.6449	29.3806	24.4105	28.626	29.4299	22.9088	26.229	22.361	21.6966	18.8226	21.8678	28.5378	32.2587	28.1399	BraA01g005850.3C	protein_coding	chrA01:2814552-2818345:-	gi|685257487|ref|XP_009126325.1|	3599	0	PREDICTED: uncharacterized protein LOC103851228 [Brassica rapa]	gi|685257486|ref|XM_009128077.1|	2172	0	PREDICTED: Brassica rapa uncharacterized LOC103851228 (LOC103851228), mRNA	F4JTJ2	1241
BraA01g005860.3C	85.0249	77.4976	86.1128	67.7218	69.3071	73.9547	57.8225	62.0411	57.8088	64.7545	63.609	56.3899	89.7579	89.0789	84.5764	77.7554	76.9072	75.8201	70.2732	70.8851	76.7714	77.2821	78.0407	78.4772	82.2378	89.7886	86.9767	79.61	84.3333	82.363	87.2966	93.2636	83.0392	83.5632	102.525	93.9945	BraA01g005860.3C	protein_coding	chrA01:2820280-2821251:+	gi|685257491|ref|XP_009126340.1|	1074	1e-146	PREDICTED: vesicle-associated membrane protein 711-like [Brassica rapa]	gi|685257490|ref|XM_009128092.1|	663	0	PREDICTED: Brassica rapa vesicle-associated membrane protein 711-like (LOC103851245), mRNA	O49377	389
BraA01g005870.3C	50.3288	70.6261	52.2645	68.1082	65.3147	71.3722	53.5155	64.1748	69.5515	59.097	56.8424	55.7932	79.7616	75.4224	72.6273	112.613	104.444	118.422	78.4017	75.2996	77.1037	87.3733	86.2623	85.9249	64.8135	62.8599	66.9039	73.8336	67.3768	71.2743	69.3939	70.9149	75.3672	79.8702	79.3595	85.0956	BraA01g005870.3C	protein_coding	chrA01:2822300-2824340:+	gi|685257494|ref|XP_009126351.1|	863	1e-114	PREDICTED: ER membrane protein complex subunit 7 homolog [Brassica rapa]	gi|685257493|ref|XM_009128103.1|	693	0	PREDICTED: Brassica rapa ER membrane protein complex subunit 7 homolog (LOC103851257), transcript variant X2, mRNA	Q8VY97	267
BraA01g005880.3C	6.28006	6.71803	7.43589	10.0449	9.42495	9.28748	7.09474	8.28497	7.66188	12.7763	10.6569	11.9027	7.95557	8.17379	9.47547	14.3708	12.5458	12.7959	14.4369	12.4734	11.0968	14.1098	11.2564	14.1167	10.7744	10.469	9.52588	11.8811	13.1179	12.1943	10.6272	7.70323	7.7932	9.15078	10.7146	12.0627	BraA01g005880.3C	protein_coding	chrA01:2825279-2827516:+	gi|685257496|ref|XP_009126353.1|	1715	0	PREDICTED: probable beta-1,3-galactosyltransferase 10 [Brassica rapa]	gi|923505205|ref|XM_013811184.1|	1047	0	PREDICTED: Brassica napus probable beta-1,3-galactosyltransferase 10 (LOC106371115), mRNA	Q94A05	614
BraA01g005890.3C	0	0	0	0	0	0	0	0	0	0.362986	0.37975	0	0	0	0.692915	0	0	0	0.357086	1.07037	0	0	0.769612	0	0.377535	0.379485	1.82066	1.38772	0.326381	2.42516	0	0	0	1.00376	0.381803	0.740457	BraA01g005890.3C	protein_coding	chrA01:2830261-2830509:+	gi|685257499|ref|XP_009126364.1|	432	5e-53	PREDICTED: uncharacterized protein LOC103851272 [Brassica rapa]	gi|922414687|ref|XM_013735994.1|	249	8e-127	PREDICTED: Brassica oleracea var. oleracea uncharacterized LOC106299963 (LOC106299963), mRNA	.	.
BraA01g005900.3C	0	0	0	0	0.80061	0	0	0	0	0	0	0	0	0	0	0	0	0	0	0	0	0	0	0.40107	0	0	0	0.346929	0	0	0	0	0.689874	0	0	0	BraA01g005900.3C	protein_coding	chrA01:2834148-2834396:+	gi|685257501|ref|XP_009126375.1|	437	7e-54	PREDICTED: uncharacterized protein LOC103851281 [Brassica rapa]	gi|685257500|ref|XM_009128127.1|	249	8e-127	PREDICTED: Brassica rapa uncharacterized LOC103851281 (LOC103851281), mRNA	.	.
BraA01g005910.3C	0.467571	0.228741	0.477264	1.51014	0.797408	1.97776	0.455368	0.746181	0.528197	0.482046	0.504308	0	1.234	0.250783	0.230048	0.986638	0.318435	1.22141	1.65973	2.36909	2.7048	1.496	2.55511	1.59786	1.25342	2.51978	3.86855	0	0.433434	1.38026	1.49603	2.2249	1.14519	0	2.28165	2.70415	BraA01g005910.3C	protein_coding	chrA01:2835932-2836482:+	gi|685257503|ref|XP_009126385.1|	661	5e-87	PREDICTED: uncharacterized protein LOC103851292 [Brassica rapa]	gi|923520546|ref|XM_013811410.1|	372	0	PREDICTED: Brassica napus uncharacterized LOC106371346 (LOC106371346), mRNA	.	.
BraA01g005920.3C	36.5795	12.5364	36.8015	14.6209	14.6596	14.0574	16.8086	17.2441	16.7573	30.3362	31.3013	27.825	18.9025	18.774	16.4661	8.01729	7.76269	7.07422	19.2258	15.3598	14.4542	11.7683	8.305	8.33371	17.5097	23.6992	24.3707	20.3916	23.3428	21.6362	10.9495	10.3432	11.2856	20.0502	17.7076	12.5806	BraA01g005920.3C	protein_coding	chrA01:2837501-2839745:+	gi|923505210|ref|XP_013666737.1|	3446	0	PREDICTED: uncharacterized protein LOC106371209 [Brassica napus]	gi|923505209|ref|XM_013811283.1|	2029	0	PREDICTED: Brassica napus uncharacterized LOC106371209 (LOC106371209), mRNA	F4IRM4	1046
BraA01g005930.3C	145.762	285.579	149.025	128.024	134.177	132.572	168.406	183.53	184.936	124.529	121.174	114.312	112.119	113.549	115.547	230.963	232.715	201.641	156.813	126.95	142.008	119.189	125.11	131.474	74.2555	77.6296	79.4346	120.183	120.563	121.18	101.184	105.689	107	142.444	141.227	133.78	BraA01g005930.3C	protein_coding	chrA01:2840723-2842955:-	gi|685257507|ref|XP_009126406.1|	2302	0	PREDICTED: calcium uptake protein 1 homolog, mitochondrial [Brassica rapa]	gi|685257506|ref|XM_009128158.1|	1485	0	PREDICTED: Brassica rapa calcium uptake protein 1 homolog, mitochondrial (LOC103851312), mRNA	Q9SZ45	761
BraA01g005940.3C	5.19314	5.82014	5.34899	5.75057	6.22639	5.54703	5.74727	7.68483	6.07981	5.59726	6.16128	5.65634	9.81815	10.7869	9.05883	12.0872	12.9895	10.236	7.85242	6.9848	7.94478	5.94131	7.63644	6.72229	5.92285	6.76758	6.00554	8.65249	9.93432	9.01222	4.6323	4.29325	4.57891	16.3752	15.6144	14.2972	BraA01g005940.3C	protein_coding	chrA01:2843458-2847743:-	gi|685257509|ref|XP_009126418.1|	3232	0	PREDICTED: neurochondrin [Brassica rapa]	gi|685257508|ref|XM_009128170.1|	1848	0	PREDICTED: Brassica rapa neurochondrin (LOC103851323), mRNA	Q5ZIG0	98.6
BraA01g005950.3C	30.8597	20.3579	32.5335	25.3847	22.859	26.0039	17.8352	21.3905	18.5749	26.5929	23.4503	24.7661	28.711	26.2486	27.8358	17.5402	20.0614	20.2551	14.5424	16.5047	14.1797	11.7187	12.009	11.5401	19.4698	18.2264	18.4562	16.202	16.2538	17.8667	21.1938	18.7057	19.1628	20.5873	13.0984	12.7013	BraA01g005950.3C	protein_coding	chrA01:2848849-2850737:-	gi|685257513|ref|XP_009126437.1|	1903	0	PREDICTED: homeobox protein knotted-1-like 5 isoform X2 [Brassica rapa]	gi|685257512|ref|XM_009128189.1|	1125	0	PREDICTED: Brassica rapa homeobox protein knotted-1-like 5 (LOC103851331), transcript variant X2, mRNA	P48002	640
BraA01g005960.3C	51.3763	78.5143	46.3072	27.4016	28.6702	27.2474	81.1354	53.1554	54.4437	51.8734	49.1853	50.3703	37.6916	41.7129	44.2935	34.645	31.4583	27.7034	95.8458	72.2429	72.2553	55.4214	64.9081	59.8661	57.2377	52.0721	51.1841	146.414	149.539	138.212	55.5482	60.0585	58.9911	102.684	86.6354	83.7613	BraA01g005960.3C	protein_coding	chrA01:2852066-2854106:-	gi|685257515|ref|XP_009126447.1|	976	6e-131	PREDICTED: uncharacterized protein LOC103851348 [Brassica rapa]	gi|685257514|ref|XM_009128199.1|	744	0	PREDICTED: Brassica rapa uncharacterized LOC103851348 (LOC103851348), mRNA	.	.
BraA01g005970.3C	656.376	427.627	657.408	417.323	388.28	412.437	473.505	483.585	489.844	658.235	670.711	672.125	475.754	519.237	520.85	331.701	311.606	357.181	328.78	291.201	280.695	264.764	240.481	241.996	325.95	320.222	347.12	568.845	563.039	580.043	376.605	372.484	374.292	430.036	428.898	410.925	BraA01g005970.3C	protein_coding	chrA01:2856674-2857285:-	gi|685257517|ref|XP_009126459.1|	999	1e-135	PREDICTED: uncharacterized protein LOC103851358 [Brassica rapa]	gi|685257516|ref|XM_009128211.1|	612	0	PREDICTED: Brassica rapa uncharacterized LOC103851358 (LOC103851358), mRNA	.	.
BraA01g005980.3C	4.97629	6.92758	3.95448	15.841	16.1	13.6246	9.88799	9.13184	9.0548	18.972	23.5584	20.1769	17.3465	17.1965	16.5963	26.7802	26.885	23.1196	26.3186	20.5096	19.1795	23.6154	22.558	23.7016	13.5727	13.2468	13.3672	24.2866	25.3249	22.8401	21.0869	19.6003	21.6277	16.5672	14.704	17.4189	BraA01g005980.3C	protein_coding	chrA01:2872476-2878074:+	gi|685257521|ref|XP_009126483.1|	2412	0	PREDICTED: aspartate aminotransferase, chloroplastic [Brassica rapa]	gi|685257520|ref|XM_009128235.1|	1407	0	PREDICTED: Brassica rapa aspartate aminotransferase, chloroplastic (LOC103851376), mRNA	P46248	888
BraA01g005990.3C	56.6753	118.053	61.2399	108.275	116.289	115.078	94.0059	93.2727	94.7853	59.571	64.2324	59.3437	74.3203	85.2566	82.1288	187.486	170.073	167.713	149.313	133.71	138.314	168.111	161.63	150.304	81.6621	72.3005	73.9548	91.6208	82.0898	81.6917	85.4739	97.3864	98.0352	78.2626	69.6212	86.3671	BraA01g005990.3C	protein_coding	chrA01:2878522-2880086:-	gi|674957818|emb|CDX75210.1|	472	4e-58	BnaA01g04920D [Brassica napus]	gi|685257522|ref|XM_009128246.1|	288	3e-148	PREDICTED: Brassica rapa 60S ribosomal protein L39-1 (LOC103851387), mRNA	P51424	103
BraA01g006000.3C	4.55426	2.84688	5.1652	1.98456	2.30132	2.37826	2.34091	1.7497	1.85783	1.30424	1.63736	1.54139	1.0684	2.03557	1.36933	1.60169	1.89545	1.48711	1.79625	2.43575	2.5281	2.56349	1.10611	0.576429	1.62782	2.31798	2.09337	1.49585	2.69724	1.74276	2.42862	2.54168	2.10695	0.721315	0.685923	1.06421	BraA01g006000.3C	protein_coding	chrA01:2881628-2882946:-	gi|685257525|ref|XP_009126505.1|	1078	7e-147	PREDICTED: deSI-like protein At4g17486 [Brassica rapa]	gi|923505242|ref|XM_013812137.1|	693	0	PREDICTED: Brassica napus deSI-like protein At4g17486 (LOC106371979), mRNA	Q93VG8	200
BraA01g006010.3C	0	0	0	0	0	0.0250858	0	0	0	0	0	0.0270976	0	0	0	0	0	0	0.0270668	0	0	0	0	0	0	0	0	0	0	0	0.0284633	0.0282205	0	0.0760839	0	0.028063	BraA01g006010.3C	protein_coding	chrA01:2885743-2892457:-	gi|685257527|ref|XP_009126516.1|	5514	0	PREDICTED: CHD3-type chromatin-remodeling factor PICKLE-like [Brassica rapa]	gi|685257526|ref|XM_009128268.1|	2305	0	PREDICTED: Brassica rapa CHD3-type chromatin-remodeling factor PICKLE-like (LOC103851409), mRNA	Q9S775	1402
BraA01g006030.3C	0.22223	0	0	0	0	0.104444	0	0	0	0	0	0.112821	0	0	0.109338	0	0.151348	0	0.112692	0	0.116868	0.237009	0.121441	0	0.357439	0	0	0	0	0	0.118507	0.234992	0	0	0.240986	0.817882	BraA01g006030.3C	protein_coding	chrA01:2914648-2915927:+	gi|674862766|emb|CDY68778.1|	1231	5e-169	BnaAnng28380D [Brassica napus]	gi|685257533|ref|XM_009128300.1|	432	0	PREDICTED: Brassica rapa UPF0725 protein At2g20620-like (LOC103851445), mRNA	.	.
BraA01g006040.3C	1.42971	2.6858	1.3426	7.12427	7.54234	7.14944	4.06579	4.44156	4.65144	8.19525	8.94382	7.78087	6.15791	6.2573	6.19013	7.16004	7.78951	4.70578	8.23603	4.63619	5.3533	12.6862	15.8132	15.8301	10.67	6.65695	7.03824	6.08586	7.52784	7.25921	14.8212	14.332	13.7266	6.46713	6.69762	7.3966	BraA01g006040.3C	protein_coding	chrA01:2919353-2921232:+	gi|685257536|ref|XP_009126559.1|	2284	0	PREDICTED: U-box domain-containing protein 14 [Brassica rapa]	gi|685257537|ref|XR_629776.1|	1530	0	PREDICTED: Brassica rapa U-box domain-containing protein 14 (LOC103851456), transcript variant X2, misc_RNA	Q9CAG5	111
BraA01g006050.3C	15.5637	15.6937	14.466	19.7012	19.4855	19.242	16.6555	19.1688	18.4091	16.4986	15.5226	16.8438	17.6285	16.8917	17.3329	29.7248	29.13	19.8977	17.7532	18.2951	16.2156	19.5671	22.9336	23.6943	21.1259	22.577	21.0198	17.3565	17.8561	17.5848	15.115	15.4507	16.3957	23.2118	23.4297	24.4523	BraA01g006050.3C	protein_coding	chrA01:2924835-2929986:+	gi|674957812|emb|CDX75204.1|	3037	0	BnaA01g04980D [Brassica napus]	gi|923669653|ref|XM_013794771.1|	1300	0	PREDICTED: Brassica napus DNA ligase 1-like (LOC106354749), transcript variant X3, mRNA	Q04264	94
BraA01g006060.3C	1.16311	4.69431	1.03882	2.81742	2.1489	1.50327	2.40711	2.16553	1.31392	2.09846	1.09769	3.24766	2.76268	1.09172	4.00581	13.7033	14.2583	9.6847	0	0	0	0	0	0	0	0.156703	0.150363	0.286519	0	0.143062	0	0.153739	0	0.138162	0.15766	0.305761	BraA01g006060.3C	protein_coding	chrA01:2935543-2937056:+	gi|674902706|emb|CDY30367.1|	417	2e-46	BnaA09g09100D [Brassica napus]	gi|5823019|gb|AF089849.1|AF089849	164	4e-79	Brassica napus senescence-specific cysteine protease (SAG12-2) gene, complete cds	Q39242	143
BraA01g006070.3C	0	0	0	0	0	0	0.217256	0.237335	0	0	0	0	0	0.478593	0	0	0	0.291367	0	1.13029	0.938515	0.951655	0.731425	1.27056	0.956807	2.16393	1.84568	2.41791	1.65433	3.07311	0.951673	0.943556	0	0.423979	0.725717	0.234572	BraA01g006070.3C	protein_coding	chrA01:2941559-2941951:+	gi|923516852|ref|XP_013650500.1|	424	6e-51	PREDICTED: uncharacterized protein LOC106355021 [Brassica napus]	gi|923673084|ref|XM_013795892.1|	393	0	PREDICTED: Brassica napus uncharacterized LOC106356046 (LOC106356046), mRNA	.	.
BraA01g006080.3C	0	0	0	0	0	0	0	0.0785124	0	0.0760805	0	0	0	0	0	0.103813	0	0	0.0748437	0	0	0	0.0806538	0.0840626	0.0791299	0	0	0	0	0	0	0	0	0	0	0	BraA01g006080.3C	protein_coding	chrA01:2942706-2943893:-	gi|685258265|ref|XP_009130045.1|	2073	0	PREDICTED: pentatricopeptide repeat-containing protein At4g31850, chloroplastic-like [Brassica rapa]	gi|685258264|ref|XM_009131797.1|	1188	0	PREDICTED: Brassica rapa pentatricopeptide repeat-containing protein At4g31850, chloroplastic-like (LOC103854836), mRNA	Q9SZ52	704
BraA01g006090.3C	0.165805	0	0	0.191253	0.141384	0.038963	0.161478	0.132302	0.280956	0.170938	0.402373	0.168351	0	0.17786	0.0407886	0.524807	0.508141	0.216562	0.294279	0.252031	0.217989	0.22104	0.27182	0.188873	0.133342	0.268062	0.128609	0.367597	0.192125	0.407879	0.0442089	0.0438318	0	0.157564	0.13485	0.174349	BraA01g006090.3C	protein_coding	chrA01:2949044-2951158:-	gi|685258267|ref|XP_009130054.1|	3723	0	PREDICTED: pentatricopeptide repeat-containing protein At4g31850, chloroplastic-like [Brassica rapa]	gi|685258266|ref|XM_009131806.1|	2112	0	PREDICTED: Brassica rapa pentatricopeptide repeat-containing protein At4g31850, chloroplastic-like (LOC103854849), mRNA	Q9SZ52	1184
BraA01g006100.3C	2.75042	28.7608	3.15837	39.9742	43.7793	46.374	25.2796	29.6278	25.8273	27.4695	28.3673	27.0537	23.0467	24.5251	21.9899	71.8214	70.9455	47.5991	64.6808	35.188	37.7877	62.8834	67.4474	65.4027	20.2759	14.2664	11.5559	38.9581	33.9417	38.2279	29.7006	28.1748	27.6193	13.3952	11.1846	16.8106	BraA01g006100.3C	protein_coding	chrA01:2951756-2952394:-	gi|685257545|ref|XP_009126596.1|	684	4e-89	PREDICTED: early nodulin-like protein 1 [Brassica rapa]	gi|685257544|ref|XM_009128348.1|	510	0	PREDICTED: Brassica rapa early nodulin-like protein 1 (LOC103851494), mRNA	Q9SK27	182
BraA01g006110.3C	0	0	0	0.266997	0	0	0	0	0.653709	0	0	0.293781	0.61089	0	0.284713	0	0	0	0	0	0	0.617162	0	0	0	0	0.299238	0.2851	0	0	0	0.305955	0.566926	0	0	0	BraA01g006110.3C	protein_coding	chrA01:2953057-2953359:+	gi|685257547|ref|XP_009126604.1|	517	6e-66	PREDICTED: uncharacterized protein LOC103851502 [Brassica rapa]	gi|685257546|ref|XM_009128356.1|	303	9e-157	PREDICTED: Brassica rapa uncharacterized LOC103851502 (LOC103851502), mRNA	.	.
BraA01g006120.3C	0.808947	1.58298	1.23858	6.765	7.01296	4.89498	7.92758	4.41082	3.71245	2.1371	2.12673	1.33472	1.44109	2.06093	1.79103	2.48935	2.47917	1.91506	6.51218	4.81606	6.38126	7.87256	9.06225	10.4819	4.60815	5.55834	5.90865	3.58693	4.03064	3.8805	8.03448	7.64517	8.96537	24.3113	11.1298	9.19743	BraA01g006120.3C	protein_coding	chrA01:2960688-2964047:+	gi|685257549|ref|XP_009126615.1|	2598	0	PREDICTED: BTB/POZ domain-containing protein NPY1 [Brassica rapa]	gi|685257548|ref|XM_009128367.1|	1734	0	PREDICTED: Brassica rapa BTB/POZ domain-containing protein NPY1 (LOC103851510), mRNA	Q8H1D3	880
BraA01g006130.3C	18.1956	108.436	18.3852	53.1702	53.3904	59.9478	64.9759	66.9725	57.0967	64.8034	71.067	71.6603	35.4095	37.3611	36.171	111.695	102.64	27.4866	135.422	65.4666	64.9524	70.1741	90.0918	84.4781	76.5649	50.3164	57.7849	107.755	103.844	100.011	173.086	166.654	176.19	229.151	241.459	267.188	BraA01g006130.3C	protein_coding	chrA01:2966565-2967891:-	gi|687568867|ref|NP_001288822.1|	1540	0	WRKY transcription factor 18 [Brassica rapa]	gi|687568866|ref|NM_001301893.1|	951	0	Brassica rapa WRKY transcription factor 18 (WRKY18), mRNA	Q9C5T4	457
BraA01g006140.3C	26.8054	36.2036	30.6874	39.771	44.1012	39.7212	47.0929	48.2021	43.3435	32.5121	29.4784	34.0479	37.9521	31.1223	35.9967	92.4234	97.6497	58.0775	53.1994	46.8705	41.0187	51.1223	51.6997	52.3281	39.1129	33.0834	35.985	36.3564	36.0545	36.8236	30.9431	28.6783	31.2044	50.9461	54.6019	56.2628	BraA01g006140.3C	protein_coding	chrA01:2972952-2974240:-	gi|685257555|ref|XP_009126649.1|	1377	0	PREDICTED: probable diphthine synthase [Brassica rapa]	gi|685257554|ref|XM_009128401.1|	834	0	PREDICTED: Brassica rapa probable diphthine synthase (LOC103851539), mRNA	O81769	504
BraA01g006150.3C	69.3985	34.4141	63.474	99.4124	98.5385	98.1456	139.482	153.326	149.299	197.433	202.291	194.444	131.682	135.671	135.904	62.8871	59.8859	61.0018	59.0092	51.5971	53.7194	79.798	72.9703	75.1547	123.93	129.451	131.565	77.4614	71.1164	71.5001	156.23	159.852	162.596	228.269	254.088	216.432	BraA01g006150.3C	protein_coding	chrA01:2975597-2977846:-	gi|685257557|ref|XP_009126661.1|	2600	0	PREDICTED: monogalactosyldiacylglycerol synthase 1, chloroplastic-like isoform X1 [Brassica rapa]	gi|685257558|ref|XM_009128420.1|	842	0	PREDICTED: Brassica rapa monogalactosyldiacylglycerol synthase 1, chloroplastic-like (LOC103851545), transcript variant X2, mRNA	O81770	859
BraA01g006160.3C	80.8382	56.164	80.7708	91.1439	88.2413	87.3119	83.903	90.951	92.4987	62.5056	60.9918	62.9082	100.963	105.137	101.673	93.0312	84.9075	101.991	66.1084	66.7268	71.0529	88.137	97.7869	100.515	111.607	106.559	114.612	39.3596	45.9996	47.2412	141.265	139.859	142.405	176.902	185.919	176.991	BraA01g006160.3C	protein_coding	chrA01:2980023-2981942:+	gi|685257561|ref|XP_009126680.1|	1601	0	PREDICTED: probable protein phosphatase 2C 59 [Brassica rapa]	gi|685257560|ref|XM_009128432.1|	924	0	PREDICTED: Brassica rapa probable protein phosphatase 2C 59 (LOC103851560), mRNA	Q8RXV3	583
BraA01g006170.3C	20.6	37.9672	20.049	53.9334	49.021	47.5827	28.1495	29.9016	34.9966	38.1949	41.3367	35.1846	43.3248	42.1397	42.584	67.6179	63.2955	64.8666	59.9241	67.1566	57.6097	61.1412	65.4486	67.1233	49.3148	36.1444	39.4716	43.4287	40.1163	43.3689	47.1767	48.4629	54.287	30.5021	28.0531	42.1474	BraA01g006170.3C	protein_coding	chrA01:2982423-2984199:-	gi|685257563|ref|XP_009126691.1|	862	1e-115	PREDICTED: ADP-ribosylation factor 1-like [Brassica rapa]	gi|567217867|ref|XM_006412500.1|	427	0	Eutrema salsugineum hypothetical protein (EUTSA_v10026351mg) mRNA, complete cds	Q96361	330
BraA01g006180.3C	1.74989	1.19849	0.178617	14.3715	11.5393	14.6391	12.4408	10.798	9.29088	2.34528	0.94369	2.13211	5.72663	8.0716	6.0267	1.96934	2.14515	1.5999	24.3139	4.25585	4.60125	16.2365	17.5951	11.5614	8.63132	5.28098	3.98148	1.55183	3.08205	0.860943	10.8246	15.9133	12.0005	4.65615	5.12348	4.41614	BraA01g006180.3C	protein_coding	chrA01:2985910-2986410:-	gi|685257565|ref|XP_009126700.1|	632	3e-81	PREDICTED: protein GLUTAMINE DUMPER 1 [Brassica rapa]	gi|923520571|ref|XM_013811481.1|	501	0	PREDICTED: Brassica napus protein GLUTAMINE DUMPER 1-like (LOC106371410), mRNA	O81775	175
BraA01g006190.3C	79.0109	105.051	75.3459	74.508	69.404	66.7393	61.559	65.6363	72.8716	62.7106	55.5673	57.1458	67.6413	56.8905	60.2811	107.19	114.106	106.025	81.889	88.8409	73.5396	62.7951	75.707	76.9341	51.0652	50.1623	44.551	71.2412	74.2456	77.7463	69.0298	64.5497	58.3199	80.2262	61.5014	67.1485	BraA01g006190.3C	protein_coding	chrA01:2992536-2993966:+	gi|685257567|ref|XP_009126711.1|	641	1e-83	PREDICTED: transcription initiation factor TFIID subunit 10 [Brassica rapa]	gi|685257568|ref|XM_009128469.1|	405	0	PREDICTED: Brassica rapa transcription initiation factor TFIID subunit 10 (LOC103851590), transcript variant X2, mRNA	O04173	249
BraA01g006200.3C	1.32833	0.840958	1.59514	0.793138	0.444189	0.440678	1.75024	1.41322	2.38324	0.725002	1.09559	0.714028	0.164973	0.167636	0	0	0	0	0.475478	0.475085	0	0.666667	0.512389	0.534045	0.0837846	0.421086	0.16162	0.230977	0.507025	0.691977	0.083335	0.165248	0.1531	0.074253	0	0.246489	BraA01g006200.3C	protein_coding	chrA01:2994307-2995791:-	gi|685257571|ref|XP_009126727.1|	1924	0	PREDICTED: caffeic acid 3-O-methyltransferase-like [Brassica rapa]	gi|685257570|ref|XM_009128479.1|	1122	0	PREDICTED: Brassica rapa caffeic acid 3-O-methyltransferase-like (LOC103851608), mRNA	Q9LPU8	384
BraA01g006210.3C	64.8499	145.013	68.5711	189.734	187.703	194.033	186.07	199.675	203.335	105.628	110.129	103.201	159.535	165.856	168.87	362.947	348.725	297.749	182.434	139.102	143.273	206.992	211.102	210.475	152.807	120.342	119.086	114.033	125.087	114.22	133.982	132.347	143.833	128.674	106.937	138.586	BraA01g006210.3C	protein_coding	chrA01:2996805-2998095:+	gi|923669610|ref|XP_013650213.1|	996	7e-134	PREDICTED: 40S ribosomal protein S6-1-like [Brassica napus]	gi|923669609|ref|XM_013794759.1|	747	0	PREDICTED: Brassica napus 40S ribosomal protein S6-1-like (LOC106354737), mRNA	O48549	368
BraA01g006220.3C	6.14974	4.38451	6.13125	9.06222	8.94319	8.82769	5.19996	5.17336	6.35473	6.9299	6.11875	5.6633	7.44827	7.56848	7.74019	9.79127	8.37646	7.5342	3.6262	3.18842	3.56001	3.81322	4.74134	4.94173	4.03834	2.98016	3.00751	3.75793	4.15404	4.26876	3.86413	2.52051	3.78305	10.9633	6.92726	6.71727	BraA01g006220.3C	protein_coding	chrA01:2998911-3001535:+	gi|685257575|ref|XP_009126746.1|	3064	0	PREDICTED: ubiquitin carboxyl-terminal hydrolase 18 [Brassica rapa]	gi|685257574|ref|XM_009128498.1|	1839	0	PREDICTED: Brassica rapa ubiquitin carboxyl-terminal hydrolase 18 (LOC103851629), mRNA	Q67XW5	924
BraA01g006230.3C	0.0596392	0.116704	0.0608756	0	0	0	0	0	0	0	0	0	0	0	0	0	0	0	0	0	0	0	0	0	0	0	0	0	0	0	0	0	0	0	0	0.0627122	BraA01g006230.3C	protein_coding	chrA01:3009989-3012088:+	gi|685257577|ref|XP_009126756.1|	2515	0	PREDICTED: putative B3 domain-containing protein REM4 isoform X1 [Brassica rapa]	gi|685257576|ref|XM_009128508.1|	1114	0	PREDICTED: Brassica rapa putative B3 domain-containing protein REM4 (LOC103851640), transcript variant X1, mRNA	Q9SB79	566
BraA01g006240.3C	0.73058	1.42963	0.845156	3.73039	4.15317	4.57815	4.07934	3.16091	3.74139	16.1184	15.9172	15.7261	4.83316	4.23196	4.98437	13.9089	12.273	10.1784	1.23492	0.296136	0.358591	0.675278	0.692009	0.83222	0.940063	0.314973	0.402974	2.20763	1.71568	2.54007	1.40253	1.49357	1.14519	2.0828	1.53167	1.33159	BraA01g006240.3C	protein_coding	chrA01:3014121-3018591:+	gi|685257584|ref|XP_009126794.1|	1363	3e-180	PREDICTED: B3 domain-containing protein REM3-like isoform X1 [Brassica rapa]	gi|685257583|ref|XM_009128546.1|	760	0	PREDICTED: Brassica rapa B3 domain-containing protein REM3-like (LOC103851661), transcript variant X1, mRNA	Q8VZQ9	234
BraA01g006250.3C	0	0	0	0	0	0	0	0	0	0	0	0	0	0	0	0	0	0	0	0	0	0	0	0	0	0	0	0.389123	0.366076	0	0	0	0	0	0	0	BraA01g006250.3C	protein_coding	chrA01:3019318-3019539:-	gi|674873083|emb|CDY60858.1|	373	8e-45	BnaA01g34840D [Brassica napus]	gi|685257587|ref|XR_629812.1|	222	7e-112	PREDICTED: Brassica rapa uncharacterized LOC103851679 (LOC103851679), ncRNA	.	.
BraA01g006260.3C	0	0.129966	0	0	0	0	0	0	0	0	0	0	0	0	0	0	0	0	0	0	0	0	0	0	0	0	0.0686887	0	0	0	0.0708348	0	0	0.12623	0	0.0698386	BraA01g006260.3C	protein_coding	chrA01:3021321-3023350:-	gi|685257593|ref|XP_009126832.1|	2213	0	PREDICTED: B3 domain-containing protein REM1-like isoform X2 [Brassica rapa]	gi|923677429|ref|XM_013797072.1|	660	0	PREDICTED: Brassica napus B3 domain-containing protein REM1-like (LOC106357395), mRNA	O65098	632
BraA01g006270.3C	0	0	0	0	0.0928082	0.230186	0.0794986	0	0	0.168312	0.264128	0	0	0	0	0.688993	1.44541	0.319853	0	0	0	0	0	0	0	0	0	0	0	0	0	0	0	0	0	0	BraA01g006270.3C	protein_coding	chrA01:3024638-3026685:-	gi|685257589|ref|XP_009126818.1|	986	5e-127	PREDICTED: B3 domain-containing protein REM1 [Brassica rapa]	gi|685257588|ref|XM_009128570.1|	565	0	PREDICTED: Brassica rapa B3 domain-containing protein REM1 (LOC103851686), mRNA	O65098	333
BraA01g006280.3C	0	0	0	0.0963096	0	0	0	0	0.117901	0.1076	0.112569	0.211942	0	0	0	0	0	0	0	0	0	0	0	0	0	0	0	0	0	0	0	0	0	0	0	0	BraA01g006280.3C	protein_coding	chrA01:3027207-3028846:+	gi|685258271|ref|XP_009130089.1|	981	1e-129	PREDICTED: LOW QUALITY PROTEIN: putative UDP-sugar transporter DDB_G0278631 [Brassica rapa]	gi|685258270|ref|XM_009131841.1|	740	0	PREDICTED: Brassica rapa putative UDP-sugar transporter DDB_G0278631 (LOC103854875), mRNA	Q94B65	345
BraA01g006290.3C	2.19279	2.97066	1.54956	26.3441	26.0816	24.9717	7.92623	8.07556	7.05024	14.4336	14.5998	16.4415	15.0911	14.3395	14.6477	20.11	19.0694	17.5148	7.52714	6.53808	6.34243	18.0794	17.9282	17.7732	12.2538	12.6353	10.4668	9.59837	11.0235	9.17022	12.7278	14.4028	14.0877	7.77417	9.37428	8.42497	BraA01g006290.3C	protein_coding	chrA01:3031336-3033947:+	gi|674873080|emb|CDY60854.1|	3355	0	BnaA01g34810D [Brassica napus]	gi|685257594|ref|XM_009128593.1|	2070	0	PREDICTED: Brassica rapa probable xyloglucan glycosyltransferase 5 (LOC103851712), mRNA	Q9SB75	1264
BraA01g006300.3C	10.1303	5.38432	10.2956	13.8605	14.9365	13.8579	5.74328	6.67786	6.31554	9.82693	9.99737	10.2858	11.4955	10.1935	10.4711	11.0475	10.3786	10.9436	6.30661	7.20372	6.83201	6.84982	7.49814	6.98366	7.82603	9.04641	9.17862	4.43002	4.89832	4.71119	7.06791	6.56	6.74987	7.8651	8.12027	7.55178	BraA01g006300.3C	protein_coding	chrA01:3035174-3042990:-	gi|923505303|ref|XP_013669252.1|	8325	0	PREDICTED: early endosome antigen 1-like isoform X3 [Brassica napus]	gi|923505302|ref|XM_013813798.1|	4931	0	PREDICTED: Brassica napus early endosome antigen 1-like (LOC106373523), transcript variant X3, mRNA	.	.
BraA01g006310.3C	0.400318	0	0	0.738814	0	0.376286	0.38987	0	0.452223	0	0	0	0	0.429423	0	0	0	0	0	0	0	0	0	0	0	0	0	0	0	0	0	0	0	0	0	0	BraA01g006310.3C	protein_coding	chrA01:3044682-3045837:+	gi|685258273|ref|XP_009130102.1|	328	4e-36	PREDICTED: uncharacterized protein LOC103854882 [Brassica rapa]	gi|199579902|gb|AC189217.2|	192	3e-95	Brassica rapa subsp. pekinensis clone KBrB010F06, complete sequence	.	.
BraA01g006320.3C	85.0539	93.3672	86.6331	75.7398	81.32	73.3352	92.9358	104.788	102.094	110.004	112.847	104.859	182.148	174.542	180.879	74.3531	74.6947	59.3742	81.3219	77.6901	74.6591	97.6364	89.0149	91.8524	207.259	179.651	182.737	176.237	171.735	167.474	240.007	230.044	220.909	116.825	107.099	114.57	BraA01g006320.3C	protein_coding	chrA01:3053567-3054947:+	gi|923669586|ref|XP_013650206.1|	1557	0	PREDICTED: probable WRKY transcription factor 11 isoform X1 [Brassica napus]	gi|685257603|ref|XM_009128630.1|	972	0	PREDICTED: Brassica rapa probable WRKY transcription factor 11 (LOC103851754), transcript variant X1, mRNA	Q9SV15	483
BraA01g006330.3C	4.95674	5.44018	5.14749	5.44902	4.45945	5.14535	3.06433	3.94368	4.38216	4.17702	4.23046	3.67616	5.91518	6.14936	6.14988	5.63897	5.28377	6.81189	2.71027	2.70803	2.90137	3.81539	2.4967	3.1914	3.37388	2.69446	2.00595	3.31271	2.3174	3.26574	3.3098	3.19041	4.56049	2.5395	3.03809	2.94599	BraA01g006330.3C	protein_coding	chrA01:3057502-3059535:+	gi|685257608|ref|XP_009126891.1|	3409	0	PREDICTED: exocyst complex component EXO70A1-like [Brassica rapa]	gi|685257607|ref|XM_009128643.1|	2034	0	PREDICTED: Brassica rapa exocyst complex component EXO70A1-like (LOC103851770), mRNA	Q9LZD3	226
BraA01g006340.3C	0.0569653	0.055736	0	0.105133	0	0.0535456	0.0554786	0	0.0643514	0	0.061441	0.11568	0	0	0	0.0801363	0.0775914	0	0.0577741	0.0577264	0	0	0.0622591	0	0.0610827	0	0	0.112262	0.264031	0.336322	0	0	0	0.162401	0.247093	0.119801	BraA01g006340.3C	protein_coding	chrA01:3060262-3062349:-	gi|685257612|ref|XP_009126913.1|	2519	0	PREDICTED: cytochrome P450 71B2-like [Brassica rapa]	gi|685257611|ref|XM_009128665.1|	1539	0	PREDICTED: Brassica rapa cytochrome P450 71B2-like (LOC103851793), mRNA	O65788	706
BraA01g006370.3C	0	0	0	0.0660948	0	0	0	0	0	0	0.0772531	0	0	0.153666	0	0	0	0	0	0	0	0	0.0782816	0	0	0.0771992	0	0.352881	0.265585	0.211437	0	0	0	0.13613	0.0776707	0	BraA01g006370.3C	protein_coding	chrA01:3074358-3076087:-	gi|923669574|ref|XP_013650201.1|	2074	0	PREDICTED: cytochrome P450 71B2-like isoform X1 [Brassica napus]	gi|923669573|ref|XM_013794747.1|	1138	0	PREDICTED: Brassica napus cytochrome P450 71B2-like (LOC106354730), transcript variant X1, mRNA	O65788	611
BraA01g006380.3C	5.45048	3.49498	4.68338	12.2188	11.9737	12.4174	4.94835	4.81598	6.15719	11.8099	13.086	12.7567	13.4257	14.5673	12.969	14.1221	13.4639	13.2325	13.0857	15.4153	13.5706	15.2713	15.2795	15.6447	18.2267	18.2213	19.6497	13.7148	13.1024	13.9384	15.1074	16.1182	16.0496	14.6023	16.2288	16.4816	BraA01g006380.3C	protein_coding	chrA01:3077789-3081001:-	gi|923505330|ref|XP_013669823.1|	4828	0	PREDICTED: coatomer subunit beta-1-like [Brassica napus]	gi|923505329|ref|XM_013814369.1|	2832	0	PREDICTED: Brassica napus coatomer subunit beta-1-like (LOC106374275), mRNA	Q9SV21	1801
BraA01g006390.3C	15.6406	22.015	20.8663	38.8675	34.0053	37.6569	31.5337	39.557	37.5069	25.4602	26.34	26.0499	41.5677	30.612	38.7463	48.4441	46.7188	39.4235	25.742	32.1162	30.8807	34.5321	28.64	28.2877	39.4268	32.0888	38.8784	23.3876	28.4886	20.1153	25.6069	25.2434	27.42	42.5034	23.5069	27.4108	BraA01g006390.3C	protein_coding	chrA01:3081829-3083138:+	gi|685257614|ref|XP_009126932.1|	922	8e-124	PREDICTED: uncharacterized protein LOC103851814 [Brassica rapa]	gi|685257613|ref|XM_009128684.1|	639	0	PREDICTED: Brassica rapa uncharacterized LOC103851814 (LOC103851814), mRNA	A0L5U1	68.9
BraA01g006400.3C	0	0	0	0	0	0	0	0.087334	0	0	0	0	0	0	0	0	0	0	0	0	0.0863382	0	0	0	0	0	0	0	0	0	0	0	0	0	0	0	BraA01g006400.3C	protein_coding	chrA01:3089589-3091369:+	gi|685257618|ref|XP_009126952.1|	1345	0	PREDICTED: cathepsin L-like proteinase [Brassica rapa]	gi|685257617|ref|XM_009128704.1|	985	0	PREDICTED: Brassica rapa cathepsin L-like proteinase (LOC103851834), mRNA	O97397	65.9
BraA01g006410.3C	17.6101	18.1614	19.6269	37.4196	36.7968	32.8374	23.6398	26.4323	25.4851	29.6372	28.2339	30.735	32.4577	35.6365	31.6597	42.5829	47.7134	32.6986	22.301	18.1347	14.8175	21.2177	20.1829	21.9034	24.905	19.8012	18.0157	17.4459	19.9422	16.0169	19.6953	20.3325	19.8636	20.2626	21.5737	24.6232	BraA01g006410.3C	protein_coding	chrA01:3091730-3093071:-	gi|685257616|ref|XP_009126942.1|	1501	0	PREDICTED: UPF0725 protein At2g20620-like [Brassica rapa]	gi|685257615|ref|XM_009128694.1|	874	0	PREDICTED: Brassica rapa UPF0725 protein At2g20620-like (LOC103851825), mRNA	.	.
BraA01g006420.3C	0	0.861223	0	0.16245	0	0.165475	0.171449	0.187295	0	0.181493	0	0.178746	0	0	0	0.24765	0.719357	0.229934	0.178543	0	0	0.187751	0.192403	0	0.188768	0.189742	0	0	0.16319	0	0	0	0	0.167293	0	0.185114	BraA01g006420.3C	protein_coding	chrA01:3094108-3095365:+	gi|297798836|ref|XP_002867302.1|	723	1e-90	zinc finger family protein [Arabidopsis lyrata subsp. lyrata]	gi|567217919|ref|XM_006412526.1|	345	7e-180	Eutrema salsugineum hypothetical protein (EUTSA_v10025002mg) mRNA, complete cds	Q9FMM4	126
BraA01g006430.3C	6.01654	2.82868	5.18419	5.33566	5.50794	5.58192	5.32683	4.07341	3.61899	4.75279	3.28677	4.04616	4.12432	3.43653	3.61372	3.73727	4.36358	4.59254	1.50568	0.95017	1.47929	1.16667	0.939379	0.623052	1.17298	1.09482	0.727292	0.769923	0.796754	1.53773	0.750015	1.40461	0.842052	3.93541	0.932048	1.31461	BraA01g006430.3C	protein_coding	chrA01:3096266-3097387:-	gi|685257620|ref|XP_009126964.1|	1882	0	PREDICTED: uncharacterized protein LOC103851844 [Brassica rapa]	gi|685257619|ref|XM_009128716.1|	1122	0	PREDICTED: Brassica rapa uncharacterized LOC103851844 (LOC103851844), mRNA	.	.
BraA01g006440.3C	14.3592	18.8788	13.34	14.4927	14.1574	13.9717	11.0892	12.3528	12.6727	11.2763	10.3451	10.1374	9.35564	10.8905	8.49985	13.5718	14.5924	12.8207	15.4733	16.5973	15.8107	16.3311	18.7587	17.6348	13.4123	14.9929	12.066	14.0936	15.0787	14.5709	12.0242	11.8624	12.0344	13.912	15.0845	15.8068	BraA01g006440.3C	protein_coding	chrA01:3098868-3102062:-	gi|685257622|ref|XP_009126975.1|	2141	0	PREDICTED: uncharacterized protein LOC103851853 isoform X1 [Brassica rapa]	gi|685257621|ref|XM_009128727.1|	1563	0	PREDICTED: Brassica rapa uncharacterized LOC103851853 (LOC103851853), transcript variant X1, mRNA	Q949W6	461
BraA01g006450.3C	18.2059	20.7182	19.8594	16.9443	15.7243	19.2429	18.1112	14.1322	17.7419	11.2778	13.1471	13.4872	21.9414	22.3793	17.9917	18.7962	14.5808	17.5537	17.3549	21.8539	21.2854	21.1667	20.4955	17.3565	21.5326	20.8017	20.3642	11.6258	11.9513	9.45702	17.2503	19.0862	17.0707	13.514	14.9975	15.611	BraA01g006450.3C	protein_coding	chrA01:3103279-3104888:+	gi|685257626|ref|XP_009126994.1|	1774	0	PREDICTED: zinc finger protein 622 [Brassica rapa]	gi|685257625|ref|XM_009128746.1|	746	0	PREDICTED: Brassica rapa zinc finger protein 622 (LOC103851869), mRNA	Q8H1G5	565
BraA01g006460.3C	22.8974	23.1879	25.0091	22.7737	23.0957	27.3014	22.0395	23.2234	21.7398	15.7988	13.7416	18.364	22.6672	20.7393	21.304	20.3043	17.4751	21.6447	24.849	31.4193	31.3923	34.0173	29.894	28.8232	26.7498	28.3283	31.2366	18.2603	17.8395	17.1832	31.7374	31.5609	28.717	32.0039	36.5204	32.509	BraA01g006460.3C	protein_coding	chrA01:3105403-3106479:-	gi|685257628|ref|XP_009127004.1|	1243	8e-169	PREDICTED: uncharacterized protein LOC103851878 [Brassica rapa]	gi|685257629|ref|XM_009128762.1|	984	0	PREDICTED: Brassica rapa uncharacterized LOC103851878 (LOC103851878), transcript variant X2, mRNA	.	.
BraA01g006470.3C	2.18648	2.55071	1.88846	2.79367	3.63327	2.64808	1.76087	1.34205	1.66249	1.86403	2.40363	2.64698	2.26381	1.62377	1.8619	2.36604	2.17636	2.58122	3.53952	3.53659	3.75913	2.42158	2.84923	1.82011	2.16417	2.22067	2.47872	3.31455	2.57254	2.77211	2.73555	2.4899	2.80118	2.47738	2.6902	3.53715	BraA01g006470.3C	protein_coding	chrA01:3107735-3111135:-	gi|685257632|ref|XP_009127022.1|	3374	0	PREDICTED: uncharacterized aarF domain-containing protein kinase At4g31390, chloroplastic [Brassica rapa]	gi|685257631|ref|XM_009128774.1|	2037	0	PREDICTED: Brassica rapa uncharacterized aarF domain-containing protein kinase At4g31390, chloroplastic (LOC103851895), mRNA	Q8RWG1	1202
BraA01g006490.3C	0	0	0	0	0	0	0.109463	0	0	0	0.242456	0.114122	0	0.120569	0	0	0	0	0	0	0	0	0	0	0	0	0	0	0	0	0	0	0	0	0	0	BraA01g006490.3C	protein_coding	chrA01:3115063-3115904:-	gi|674917715|emb|CDY15575.1|	1013	4e-133	BnaA08g28590D [Brassica napus]	gi|199580272|gb|AC189578.2|	726	0	Brassica rapa subsp. pekinensis clone KBrH011G12, complete sequence	.	.
BraA01g006500.3C	0	0	0	0	0	0	0	0	0	0	0.393991	0	0	0	0	0.513874	0	0	0	0	0.384205	0	0	0	0	0	0	0	0	0	0	0	0	0	0.396121	0	BraA01g006500.3C	protein_coding	chrA01:3126353-3126947:+	gi|685364828|ref|XP_009116577.1|	419	3e-51	PREDICTED: uncharacterized protein LOC103841767 [Brassica rapa]	gi|685364827|ref|XM_009118329.1|	240	7e-122	PREDICTED: Brassica rapa uncharacterized LOC103841767 (LOC103841767), transcript variant X1, mRNA	Q8VY74	84.7
BraA01g006520.3C	10.0528	6.176	7.3976	1.51014	3.45543	3.29627	8.19662	8.45672	5.01787	0.723069	1.26077	3.798	1.9744	1.75548	2.53053	0.328879	0	0	12.8037	11.6085	9.83564	2.49334	2.81062	3.99465	15.2917	7.30736	8.22066	0	0.216717	1.61031	4.73743	5.43865	7.10018	0.666495	0.760551	0.491664	BraA01g006520.3C	protein_coding	chrA01:3130560-3130934:-	gi|685257634|ref|XP_009127035.1|	544	3e-69	PREDICTED: flowering-promoting factor 1-like protein 1 [Brassica rapa]	gi|199580272|gb|AC189578.2|	375	0	Brassica rapa subsp. pekinensis clone KBrH011G12, complete sequence	.	.
BraA01g006530.3C	5.44839	35.0542	7.41512	22.7008	23.8396	25.6066	17.0441	20.0246	13.9883	17.0214	14.246	16.4285	12.5491	10.9806	11.21	21.1356	15.7419	12.723	42.8664	42.1618	36.2932	38.0339	42.4048	36.1099	16.4644	16.9053	14.3431	20.0102	19.8963	20.6325	16.9043	15.8872	13.1018	13.8069	19.157	13.1944	BraA01g006530.3C	protein_coding	chrA01:3134161-3135305:-	gi|685257636|ref|XP_009127045.1|	751	5e-99	PREDICTED: selenoprotein H isoform X1 [Brassica rapa]	gi|685257635|ref|XM_009128797.1|	522	0	PREDICTED: Brassica rapa selenoprotein H (LOC103851913), transcript variant X1, mRNA	.	.
BraA01g006540.3C	4.80594	10.2387	4.03523	7.36756	6.69794	6.33898	7.39822	8.74174	6.83013	14.1449	15.049	12.6715	10.3924	9.22974	11.06	23.7718	21.9611	18.9327	14.1508	10.0545	11.4956	13.7233	10.6745	11.4789	8.39491	9.35727	10.3416	22.6847	24.1435	24.4841	12.2354	11.6393	8.96104	15.6164	18.2405	14.9162	BraA01g006540.3C	protein_coding	chrA01:3135962-3137948:-	gi|685257642|ref|XP_009127065.1|	1951	0	PREDICTED: uncharacterized protein LOC103851936 [Brassica rapa]	gi|685257641|ref|XM_009128817.1|	1131	0	PREDICTED: Brassica rapa uncharacterized LOC103851936 (LOC103851936), mRNA	.	.
BraA01g006550.3C	0	0	0	0	0	0	0	0	0	0.0786629	0.0822957	0	0	0	0	0	0	0	0	0	0.0802517	0	0	0.0869159	0	0	0	0	0	0.0750796	0	0	0	0.145016	0	0.0802323	BraA01g006550.3C	protein_coding	chrA01:3139404-3140552:+	gi|674904864|emb|CDY28258.1|	829	6e-107	BnaA01g05910D [Brassica napus]	gi|199580272|gb|AC189578.2|	1149	0	Brassica rapa subsp. pekinensis clone KBrH011G12, complete sequence	.	.
BraA01g006560.3C	153.572	110.593	151.659	175.13	181.566	169.068	168.753	183.288	190.403	183.856	201.68	196.213	188.473	204.297	191.794	146.741	153.324	170.326	190.791	172.69	170.625	166.27	137.141	132.624	182.873	195.369	193.524	179.33	177.841	183.21	198.15	207.863	196.887	184.526	198.151	199.353	BraA01g006560.3C	protein_coding	chrA01:3141626-3144635:-	gi|685257644|ref|XP_009127076.1|	1943	0	PREDICTED: uncharacterized protein LOC103851944 [Brassica rapa]	gi|685257643|ref|XM_009128828.1|	1317	0	PREDICTED: Brassica rapa uncharacterized LOC103851944 (LOC103851944), mRNA	.	.
BraA01g006570.3C	2.42516	0.711849	1.48526	4.25201	2.61942	0.569894	0.35428	0.516031	0.684902	0.375036	0.261571	0.12312	0.128008	0	0.119319	0	0	0	0.368939	1.22878	2.16813	1.81051	2.78306	2.07192	1.56027	1.43763	1.50488	1.07534	0.337215	0.238635	1.5519	0.512887	0.712774	0	0.262985	0	BraA01g006570.3C	protein_coding	chrA01:3146817-3147616:-	gi|685257646|ref|XP_009127086.1|	1155	3e-158	PREDICTED: uncharacterized protein LOC103851956 [Brassica rapa]	gi|685257645|ref|XM_009128838.1|	723	0	PREDICTED: Brassica rapa uncharacterized LOC103851956 (LOC103851956), mRNA	.	.
BraA01g006580.3C	0.160567	0	0	1.92619	1.2779	2.41485	0	0.512487	0.181386	0.993227	0.692731	0.652128	0.847525	0.516723	0.79	0.225879	0.218706	0.20972	1.95416	0.325425	0.675525	4.45238	1.5794	3.65811	1.03304	1.38449	0.996363	0.949289	1.3396	1.89597	5.13747	4.2447	4.8765	0.457757	0.522357	0.675362	BraA01g006580.3C	protein_coding	chrA01:3153839-3154384:+	gi|685257648|ref|XP_009127095.1|	911	4e-123	PREDICTED: uncharacterized protein LOC103851967 [Brassica rapa]	gi|685257647|ref|XM_009128847.1|	546	0	PREDICTED: Brassica rapa uncharacterized LOC103851967 (LOC103851967), mRNA	Q9FJF9	69.3
BraA01g006590.3C	16.36	24.1937	20.3959	44.4835	45.8623	46.838	31.1363	36.4056	29.3443	42.6168	42.5645	41.7181	41.6606	45.4142	45.5917	93.2879	90.6656	75.3595	63.9626	48.4702	48.0749	48.6147	59.1006	52.0671	40.5754	27.0553	33.5811	52.4219	44.4548	50.7522	48.0829	47.0125	44.7799	25.1597	30.0645	41.2346	BraA01g006590.3C	protein_coding	chrA01:3156730-3158838:-	gi|685257650|ref|XP_009127104.1|	1203	7e-166	PREDICTED: proteasome subunit beta type-6 [Brassica rapa]	gi|685257649|ref|XM_009128856.1|	702	0	PREDICTED: Brassica rapa proteasome subunit beta type-6 (LOC103851976), mRNA	Q8LD27	462
BraA01g006600.3C	40.5023	82.0156	42.5194	35.6008	37.4514	38.9143	43.1901	44.3182	52.1247	39.2455	33.0399	30.8431	37.6153	33.9602	31.1523	57.3375	64.2457	69.3071	73.4453	96.7639	74.9536	46.2033	42.8654	39.1289	29.2739	31.3591	33.4044	28.1636	28.5154	22.9539	29.6636	26.5644	25.8672	24.9692	30.9947	24.7988	BraA01g006600.3C	protein_coding	chrA01:3160960-3162290:-	gi|685257652|ref|XP_009127116.1|	1224	4e-169	PREDICTED: cation transport regulator-like protein 2 [Brassica rapa]	gi|685257651|ref|XM_009128868.1|	681	0	PREDICTED: Brassica rapa cation transport regulator-like protein 2 (LOC103851987), mRNA	Q84MC1	457
BraA01g006610.3C	0.197121	0	0.301811	0.0909501	0	0.0926438	0	0	0	0.355641	0.265761	0.150111	0.364164	0.581495	0.19397	0	0	0	0.0999599	0	0.207328	0	0	0	0.422738	0.21246	0	0.0971167	0.0913647	0.0969831	0.315352	0.468993	0.531075	0	0	0	BraA01g006610.3C	protein_coding	chrA01:3162590-3167953:+	gi|674904858|emb|CDY28252.1|	1341	1e-166	BnaA01g05970D [Brassica napus]	gi|199580272|gb|AC189578.2|	735	0	Brassica rapa subsp. pekinensis clone KBrH011G12, complete sequence	C0LGR9	370
BraA01g006620.3C	1.17116	0	1.02466	0.102926	0.380443	0.314529	0.0543139	0	0.189002	1.3799	0.902269	1.01926	0.765361	0.598241	0.713412	0	0	0	0.904981	1.46938	0.234629	0.237914	0.182856	0.508226	0.897007	0.84153	1.09587	0.43962	0.361884	0.603646	1.07063	1.12047	1.52983	0.476976	0.0604764	0.175929	BraA01g006620.3C	protein_coding	chrA01:3168034-3171555:+	gi|923673057|ref|XP_013651335.1|	1219	2e-163	PREDICTED: probable LRR receptor-like serine/threonine-protein kinase At4g31250 [Brassica napus]	gi|685258278|ref|XM_009131900.1|	838	0	PREDICTED: Brassica rapa probable LRR receptor-like serine/threonine-protein kinase At4g31250 (LOC103854932), mRNA	C0LGR9	421
BraA01g006630.3C	13.3784	4.82637	12.2063	2.82771	3.14408	2.66961	4.0034	4.61195	4.64367	7.70534	5.64283	8.1958	3.2349	2.00434	3.08888	1.78739	1.73063	1.75715	12.2039	11.5879	11.3984	6.77537	7.02492	9.53541	7.8539	5.88056	6.26103	5.44971	4.08769	4.48615	4.62328	4.42578	5.19875	3.83533	3.24191	4.71544	BraA01g006630.3C	protein_coding	chrA01:3172543-3174007:+	gi|685257660|ref|XP_009127152.1|	2091	0	PREDICTED: probable nucleoredoxin 3 [Brassica rapa]	gi|923669524|ref|XM_013794733.1|	1173	0	PREDICTED: Brassica napus probable nucleoredoxin 3 (LOC106354719), transcript variant X3, mRNA	Q8VZQ0	731
BraA01g006640.3C	3.44962	2.74836	3.82294	5.95723	5.23873	5.37334	5.11137	4.9284	5.20514	6.9096	6.21881	7.38043	6.37288	6.42287	6.23127	9.08162	7.81992	7.94922	3.12375	2.72166	1.91778	3.73159	3.52782	2.91908	2.69495	4.06331	3.84796	4.88012	5.0479	4.26726	2.73305	2.52735	2.34156	4.49575	4.80956	4.63785	BraA01g006640.3C	protein_coding	chrA01:3174231-3180813:-	gi|685257654|ref|XP_009127126.1|	5575	0	PREDICTED: uncharacterized protein LOC103851997 isoform X1 [Brassica rapa]	gi|685257653|ref|XM_009128878.1|	3558	0	PREDICTED: Brassica rapa uncharacterized LOC103851997 (LOC103851997), transcript variant X1, mRNA	Q4UM42	662
BraA01g006650.3C	6.4171	4.92353	5.37205	7.71086	7.45339	7.76767	4.9907	5.00991	5.21521	5.94942	5.57687	6.28124	7.60283	5.94272	6.6325	8.11807	7.0428	8.38153	3.83938	4.25725	3.49608	3.74197	2.92647	2.52427	2.62366	3.23432	3.53318	2.22901	3.55204	3.08906	3.44662	3.75894	3.30169	5.00134	2.10263	2.03889	BraA01g006650.3C	protein_coding	chrA01:3181367-3183509:+	gi|685257664|ref|XP_009127174.1|	2401	0	PREDICTED: calcium homeostasis endoplasmic reticulum protein [Brassica rapa]	gi|685257663|ref|XM_009128926.1|	1899	0	PREDICTED: Brassica rapa calcium homeostasis endoplasmic reticulum protein (LOC103852032), mRNA	Q8CGZ0	63.9
BraA01g006660.3C	47.3416	38.3661	49.0281	59.719	59.9868	56.2363	35.291	40.9835	38.8945	57.5716	60.1158	56.3765	68.8234	69.8772	71.158	60.4689	58.9105	61.5564	65.9583	56.3198	57.8962	52.36	46.2243	42.0044	53.84	53.8317	52.4782	55.4437	57.6763	58.3998	51.9644	57.4205	52.4705	50.2901	47.5345	45.7582	BraA01g006660.3C	protein_coding	chrA01:3184127-3186575:-	gi|923505691|ref|XP_013679459.1|	2688	0	PREDICTED: aspartate--tRNA ligase 2, cytoplasmic-like [Brassica napus]	gi|685257665|ref|XM_009128937.1|	1650	0	PREDICTED: Brassica rapa aspartate--tRNA ligase, cytoplasmic (LOC103852042), mRNA	Q9M084	827
BraA01g006670.3C	44.6818	38.3997	44.5274	44.2931	40.9297	41.137	34.8538	39.2016	39.551	59.2369	57.633	60.7054	48.5104	49.0662	45.9123	46.6707	50.6689	41.9491	39.5175	37.9827	39.7197	45.6961	38.805	44.3046	44.8839	45.5721	50.6637	53.1388	52.1508	51.2598	45.17	39.3359	43.2904	54.8704	55.7248	57.0787	BraA01g006670.3C	protein_coding	chrA01:3187647-3188965:+	gi|685257668|ref|XP_009127195.1|	2154	0	PREDICTED: serine/threonine-protein kinase HT1-like [Brassica rapa]	gi|685257669|ref|XM_009128954.1|	1242	0	PREDICTED: Brassica rapa serine/threonine-protein kinase HT1-like (LOC103852053), transcript variant X2, mRNA	Q9ZQ31	697
BraA01g006680.3C	19.7438	4.13529	18.7356	30.3097	30.3421	29.1148	11.2313	11.7554	11.4588	20.853	20.188	16.9816	19.9505	21.3735	19.9628	9.08835	7.89509	17.5073	8.81795	8.01526	6.73152	12.1061	12.9999	10.3168	10.7473	14.382	11.1775	6.42536	5.31718	6.29769	13.7162	12.3861	14.1966	12.7378	11.3926	9.7774	BraA01g006680.3C	protein_coding	chrA01:3190104-3192089:-	gi|685257672|ref|XP_009127212.1|	2563	0	PREDICTED: glucan endo-1,3-beta-glucosidase 5 [Brassica rapa]	gi|685257671|ref|XM_009128964.1|	1452	0	PREDICTED: Brassica rapa glucan endo-1,3-beta-glucosidase 5 (LOC103852070), mRNA	Q9M088	880
BraA01g006690.3C	12.3751	13.8587	11.1098	15.4095	17.6298	15.9768	5.80827	8.2486	4.88447	18.5994	20.7448	19.0748	23.2948	19.8323	23.621	25.1693	27.2132	29.7953	69.5588	63.9111	74.6455	63.6055	54.4265	55.3681	85.6928	71.5116	82.3423	61.8507	68.5533	68.9545	101.771	106.736	93.9231	70.2767	65.6428	72.119	BraA01g006690.3C	protein_coding	chrA01:3198282-3199128:+	gi|685257674|ref|XP_009127223.1|	945	6e-128	PREDICTED: uncharacterized protein LOC103852081 [Brassica rapa]	gi|685257673|ref|XM_009128975.1|	588	0	PREDICTED: Brassica rapa uncharacterized LOC103852081 (LOC103852081), mRNA	.	.
BraA01g006700.3C	2.67014	1.16112	3.58352	3.65031	3.54179	3.02111	1.20391	1.99908	0.949592	1.58031	1.3333	0.803299	2.50558	1.85647	1.75163	1.87812	2.15523	3.03545	0	0.100215	0	0	0	0	0.106042	0	0	0.0487227	0.0458369	0.0486557	0.0527365	0.15686	0.193772	0.0469892	0.0536204	0.10399	BraA01g006700.3C	protein_coding	chrA01:3202914-3211081:-	gi|923520699|ref|XP_013667426.1|	1706	0	PREDICTED: wall-associated receptor kinase-like 18 [Brassica napus]	gi|923520698|ref|XM_013811972.1|	978	0	PREDICTED: Brassica napus wall-associated receptor kinase-like 18 (LOC106371868), mRNA	Q9M092	285
BraA01g006710.3C	8.31276	0.0838492	6.38569	1.66071	2.33844	1.61108	1.58578	1.82351	2.61388	2.29714	1.29405	2.17536	2.89501	1.93051	3.03582	0	0	1.34319	0.0869153	0.173687	0	0	0	0.0976211	0	0.0923673	0	0.0844431	0	0.084327	0	0	0	0.488632	0.185863	0	BraA01g006710.3C	protein_coding	chrA01:3218540-3219562:+	gi|685257676|ref|XP_009127255.1|	1736	0	PREDICTED: wall-associated receptor kinase-like 18 [Brassica rapa]	gi|685257675|ref|XM_009129007.1|	1015	0	PREDICTED: Brassica rapa wall-associated receptor kinase-like 18 (LOC103852110), mRNA	Q0WNY5	268
BraA01g006720.3C	0.656134	1.77778	1.03036	1.67669	1.60675	2.08745	1.6221	0.912859	1.02629	1.09272	1.46981	1.74239	1.4386	0.866262	0.993298	2.20105	2.33739	2.96651	0.972581	0.562608	0.583938	0.69977	0.551622	1.14987	0.595319	0.435195	0.939576	0.248662	0.421082	0.695297	0.645954	0.693815	0.395575	1.05519	0.383122	0.371508	BraA01g006720.3C	protein_coding	chrA01:3221601-3224484:-	gi|685257680|ref|XP_009127279.1|	1468	0	PREDICTED: plastidial lipoyltransferase 2 [Brassica rapa]	gi|685257679|ref|XM_009129031.1|	819	0	PREDICTED: Brassica rapa plastidial lipoyltransferase 2 (LOC103852129), mRNA	Q948J9	476
BraA01g006730.3C	7.55657	12.5624	5.59721	9.56485	8.66748	11.4401	4.36351	6.04743	5.36355	2.96453	1.87529	3.66654	4.0239	3.37151	3.88239	4.51551	4.28102	7.94826	23.0594	22.1594	27.1493	11.1259	15.0559	14.8543	12.5485	10.7393	11.8956	18.5817	19.0929	15.9899	8.4872	9.05122	6.55143	6.41838	8.19435	9.00071	BraA01g006730.3C	protein_coding	chrA01:3224880-3226724:+	gi|685257682|ref|XP_009127292.1|	2084	0	PREDICTED: chloroplast envelope membrane protein [Brassica rapa]	gi|685257681|ref|XM_009129044.1|	1311	0	PREDICTED: Brassica rapa chloroplast envelope membrane protein (LOC103852137), mRNA	A6MVV9	144
BraA01g006740.3C	6.93432	12.697	6.16804	7.95289	9.01026	9.49772	13.4102	13.9119	12.9811	8.17027	9.08182	8.24777	7.00659	9.45749	6.72598	23.5511	21.184	28.5945	13.3623	10.7412	15.7329	9.40283	12.0177	11.51	9.55997	7.79424	8.70833	10.6395	11.0195	9.65015	10.0369	12.6748	11.0637	26.9234	26.4259	23.1249	BraA01g006740.3C	protein_coding	chrA01:3229250-3230506:+	gi|685257690|ref|XP_009127331.1|	1505	0	PREDICTED: alpha/beta hydrolase domain-containing protein 17B [Brassica rapa]	gi|685257689|ref|XM_009129083.1|	885	0	PREDICTED: Brassica rapa alpha/beta hydrolase domain-containing protein 17B (LOC103852170), mRNA	Q96GS6	225
BraA01g006750.3C	113.046	124.772	105.41	101.261	98.5826	97.1204	118.265	126.751	123.057	64.0011	62.808	69.379	87.6995	89.9746	91.4724	82.8211	88.8504	66.6389	102.189	88.8409	93.6701	92.8733	119.639	125.67	100.995	116.834	115.809	52.2208	53.9316	50.8347	68.4883	73.7793	76.3635	81.8395	89.4494	90.5578	BraA01g006750.3C	protein_coding	chrA01:3230996-3233189:-	gi|685257686|ref|XP_009127315.1|	2836	0	PREDICTED: uncharacterized protein LOC103852153 isoform X1 [Brassica rapa]	gi|685257685|ref|XM_009129067.1|	1627	0	PREDICTED: Brassica rapa uncharacterized LOC103852153 (LOC103852153), transcript variant X1, mRNA	F4JR57	864
BraA01g006760.3C	75.8747	64.4194	70.799	160.825	177.735	159.022	122.586	120.618	106.594	76.0457	80.6969	72.9284	189.188	202.25	205.969	147.104	148.187	183.488	81.7726	76.8884	69.2494	155.27	149.497	161.631	169.136	177.978	157.669	69.0389	68.2136	79.6839	182.685	160.836	173.331	195.565	201.592	212.326	BraA01g006760.3C	protein_coding	chrA01:3234081-3235118:-	gi|685257684|ref|XP_009127303.1|	751	3e-99	PREDICTED: uncharacterized protein LOC103852146 [Brassica rapa]	gi|685257683|ref|XM_009129055.1|	438	0	PREDICTED: Brassica rapa uncharacterized LOC103852146 (LOC103852146), mRNA	.	.
BraA01g006770.3C	0.76593	2.93996	1.20278	2.17473	1.80864	2.38138	1.7214	2.44465	2.3295	1.03261	1.20739	0.777689	1.74153	0.94802	1.6813	9.2	8.98809	6.69499	0.83656	0.597049	0.495748	0.439852	1.99618	1.4094	0.631763	0.50802	0.365601	0.464437	0.273081	0.231899	0.502698	0.249205	0.404049	0.559891	0.511123	0.185861	BraA01g006770.3C	protein_coding	chrA01:3235588-3237720:-	gi|685257692|ref|XP_009127344.1|	2696	0	PREDICTED: lysosomal Pro-X carboxypeptidase-like [Brassica rapa]	gi|685257691|ref|XM_009129096.1|	1488	0	PREDICTED: Brassica rapa lysosomal Pro-X carboxypeptidase-like (LOC103852179), mRNA	Q7TMR0	404
BraA01g006780.3C	3.3369	5.54043	3.81894	10.1708	8.50752	7.88899	4.13613	2.90469	3.42688	6.56767	5.78035	7.70031	6.08459	4.55574	6.26861	4.83646	6.74884	9.50926	13.1269	12.1939	13.9324	13.1569	10.0569	13.1312	7.26462	8.28302	6.90214	7.27351	6.84271	7.96	10.5688	8.66096	9.90649	4.13196	4.38611	5.84808	BraA01g006780.3C	protein_coding	chrA01:3239211-3241441:-	gi|685257694|ref|XP_009127355.1|	1325	0	PREDICTED: uncharacterized protein LOC103852187 [Brassica rapa]	gi|685257693|ref|XM_009129107.1|	724	0	PREDICTED: Brassica rapa uncharacterized LOC103852187 (LOC103852187), mRNA	.	.
BraA01g006790.3C	72.5234	39.3148	71.7534	80.7357	70.9077	71.1009	61.3463	69.9545	65.8233	8.63421	7.87981	8.50352	50.6955	64.8939	59.0024	36.9739	33.7367	58.8828	23.9454	34.9405	40.6695	71.1703	86.6635	76.0162	89.5162	89.2102	83.574	15.7144	13.3796	16.2188	67.4658	69.1514	66.8609	107.95	111.59	92.1869	BraA01g006790.3C	protein_coding	chrA01:3243080-3245344:+	gi|923505621|ref|XP_013677918.1|	1263	8e-172	PREDICTED: transcription factor bHLH69-like [Brassica napus]	gi|685257695|ref|XM_009129118.1|	984	0	PREDICTED: Brassica rapa transcription factor bHLH69 (LOC103852197), mRNA	Q8S3D5	379
BraA01g006800.3C	257.786	434.517	252.197	317.743	319.324	321.237	211.2	226.992	206.887	101.971	101.76	103.986	196.616	195.321	194.656	558.704	540.872	558.893	207.199	290.642	281.773	270.064	245.539	263.072	206.587	187.273	186.33	104.561	111.484	105.979	225.293	223.092	225.411	331.677	302.916	280.315	BraA01g006800.3C	protein_coding	chrA01:3260617-3261942:-	gi|923505404|ref|XP_013671813.1|	2206	0	PREDICTED: CBL-interacting serine/threonine-protein kinase 6-like [Brassica napus]	gi|685257697|ref|XM_009129130.1|	1296	0	PREDICTED: Brassica rapa CBL-interacting serine/threonine-protein kinase 6 (LOC103852207), mRNA	O65554	803
BraA01g006810.3C	0.394908	1.15916	0.470277	1.5184	1.94563	1.54667	0.769203	1.19042	1.63574	0.6107	1.13583	1.60388	1.80653	1.34146	0.841954	5.92575	5.73757	2.49303	2.6701	3.26817	2.14601	3.65015	2.87738	2.47417	0.988054	1.56067	1.29333	2.01047	2.25747	2.72011	2.38668	2.85351	1.99892	1.68875	1.35609	2.28391	BraA01g006810.3C	protein_coding	chrA01:3276523-3278612:+	gi|674904836|emb|CDY28230.1|	2370	0	BnaA01g06190D [Brassica napus]	gi|685257699|ref|XM_009129140.1|	1323	0	PREDICTED: Brassica rapa omega-6 fatty acid desaturase, chloroplastic (LOC103852217), mRNA	P48627	896
BraA01g006830.3C	17.9514	19.8787	12.6418	26.9667	30.061	24.5912	21.2776	25.613	25.6238	18.2202	16.36	16.6727	29.9685	23.8841	24.5111	35.6286	41.8894	36.1698	13.8311	17.0631	15.2218	19.1453	12.4714	17.2785	18.0552	15.2987	20.0048	16.3172	11.7388	13.2823	18.4035	12.6549	11.1792	28.4318	18.8629	16.6814	BraA01g006830.3C	protein_coding	chrA01:3280941-3281828:+	gi|685257704|ref|XP_009127405.1|	824	3e-108	PREDICTED: 50S ribosomal protein L21, mitochondrial [Brassica rapa]	gi|685257703|ref|XM_009129157.1|	582	0	PREDICTED: Brassica rapa 50S ribosomal protein L21, mitochondrial (LOC103852238), mRNA	Q8L9A0	259
BraA01g006840.3C	8.70691	14.1494	10.3687	13.8528	13.1991	14.393	9.74675	10.3814	10.2315	11.7107	13.5468	14.5311	10.1953	10.9503	12.3592	17.1761	14.2451	14.5748	9.13504	10.0402	8.73671	7.20463	6.94562	5.41513	5.312	4.74616	5.07167	6.06472	6.77241	7.68126	5.60371	5.07969	6.07892	7.13286	4.50384	4.15683	BraA01g006840.3C	protein_coding	chrA01:3282956-3285575:+	gi|685257710|ref|XP_009127424.1|	2709	0	PREDICTED: leucine aminopeptidase 3, chloroplastic [Brassica rapa]	gi|685257709|ref|XM_009129176.1|	1752	0	PREDICTED: Brassica rapa leucine aminopeptidase 3, chloroplastic (LOC103852260), mRNA	Q944P7	975
BraA01g006850.3C	6.24273	8.0555	6.18744	6.59557	6.99481	5.27267	5.99168	7.41176	5.8257	14.3644	11.7099	12.0341	6.78125	6.79365	7.47834	14.6367	14.4183	9.45365	12.0204	7.6097	7.32725	6.94737	7.21839	7.00817	6.20888	5.26579	4.86563	11.7677	11.49	13.3539	7.52647	7.74928	9.21825	4.04093	5.00363	7.13521	BraA01g006850.3C	protein_coding	chrA01:3285891-3287715:-	gi|674964240|emb|CDX68702.1|	1652	0	BnaC01g07510D [Brassica napus]	gi|685257707|ref|XM_009129172.1|	904	0	PREDICTED: Brassica rapa uncharacterized LOC103852248 (LOC103852248), transcript variant X2, mRNA	.	.
BraA01g006860.3C	11.3728	9.4341	11.5076	15.6051	15.4602	14.6408	13.8209	14.8352	13.2384	16.7207	17.5463	17.522	17.1736	17.5569	18.7814	30.189	28.8936	25.5752	16.4489	12.7775	14.094	17.8246	17.1314	16.4473	15.4291	16.0417	17.8474	21.4867	21.7725	23.0141	17.825	16.3135	14.8235	23.7295	18.928	23.6577	BraA01g006860.3C	protein_coding	chrA01:3291825-3294116:+	gi|674904830|emb|CDY28224.1|	3065	0	BnaA01g06250D [Brassica napus]	gi|685257711|ref|XM_009129183.1|	1722	0	PREDICTED: Brassica rapa ubiquitin carboxyl-terminal hydrolase 24 (LOC103852268), mRNA	Q9FPS3	806
BraA01g006870.3C	0	0.519865	0.271173	1.47091	4.22868	2.24746	1.03493	1.97851	1.50056	0.54778	0	0	0.280454	0	0.261418	0	0	0	9.16087	12.1147	12.574	10.4833	8.1299	9.98664	4.84275	3.43606	1.92328	3.40306	5.41792	5.22827	1.98337	2.5283	2.08216	2.77706	1.44044	0	BraA01g006870.3C	protein_coding	chrA01:3294558-3294994:-	gi|685257714|ref|XP_009127438.1|	558	8e-72	PREDICTED: uncharacterized protein LOC103852279 [Brassica rapa]	gi|685257713|ref|XM_009129190.1|	330	1e-171	PREDICTED: Brassica rapa uncharacterized LOC103852279 (LOC103852279), mRNA	.	.
BraA01g006880.3C	43.1001	24.1999	49.0762	26.2134	26.0791	25.3205	43.1677	38.1254	43.9856	39.2167	38.2105	41.6898	40.2428	39.0535	37.7523	23.0813	21.6812	20.2573	35.4333	20.9281	20.9488	18.2821	18.3782	16.6444	17.5934	19.4438	20.8522	22.843	20.3551	20.9642	25.5084	27.6214	27.5901	17.6863	12.127	14.2486	BraA01g006880.3C	protein_coding	chrA01:3301491-3303260:+	gi|685257718|ref|XP_009127453.1|	1797	0	PREDICTED: adiponectin receptor protein 1-like [Brassica rapa]	gi|685257719|ref|XM_009129211.1|	1074	0	PREDICTED: Brassica rapa adiponectin receptor protein 1-like (LOC103852293), transcript variant X2, mRNA	Q84N34	606
BraA01g006890.3C	0	0.742665	0.38739	0.350217	0.431498	0.356739	1.47847	1.21133	2.14366	2.34763	0.409341	1.15605	0	1.62846	1.49382	1.06779	1.03388	0	0.384911	0.384593	0	0.404762	0	0.432322	0	0	0	0.373962	0	0	0.80954	0	0	2.5246	0	0.399078	BraA01g006890.3C	protein_coding	chrA01:3303978-3304208:+	gi|685257716|ref|XP_009127443.1|	289	1e-30	PREDICTED: LOW QUALITY PROTEIN: uncharacterized protein LOC103852286, partial [Brassica rapa]	gi|685257715|ref|XM_009129195.1|	220	9e-111	PREDICTED: Brassica rapa uncharacterized LOC103852286 (LOC103852286), partial mRNA	Q24JJ9	98.6
BraA01g006900.3C	1.01941	1.8286	1.56082	1.09748	0.772682	1.11792	0.496404	0.903805	1.15159	0.87581	2.10739	1.12132	1.52456	1.09353	0.167186	2.98764	3.81845	2.99583	0.172315	0.258258	0.0893499	0.181202	0.0928456	0.483849	0	0.0915618	0.0878576	0	0.0787489	0	0	0.269489	0.41613	0.242186	0.184242	0.178657	BraA01g006900.3C	protein_coding	chrA01:3304313-3306559:+	gi|685257722|ref|XP_009127471.1|	1342	0	PREDICTED: calponin homology domain-containing protein DDB_G0272472-like isoform X1 [Brassica rapa]	gi|685257723|ref|XM_009129229.1|	963	0	PREDICTED: Brassica rapa calponin homology domain-containing protein DDB_G0272472-like (LOC103852309), transcript variant X2, mRNA	.	.
BraA01g006910.3C	0.597747	0.877273	0.542346	0.796743	0.415317	0.655508	0.614488	0.247314	0.750279	0.753197	0.895433	0.809232	0.666078	0.712451	0.457482	1.35476	1.22127	1.64821	0.572555	0.740341	0.803337	0.283334	0.399236	0.718735	0.605344	0.4653	0.412132	0.458104	0.492539	0.620857	0.354174	0.456499	0.292804	0.599593	0.612186	0.453951	BraA01g006910.3C	protein_coding	chrA01:3306951-3309590:-	gi|685257726|ref|XP_009127486.1|	4737	0	PREDICTED: pentatricopeptide repeat-containing protein At4g30825, chloroplastic [Brassica rapa]	gi|685257725|ref|XM_009129238.1|	2640	0	PREDICTED: Brassica rapa pentatricopeptide repeat-containing protein At4g30825, chloroplastic (LOC103852325), mRNA	O65567	1460
BraA01g006920.3C	0.125153	0	0	0	0	0	0.18283	0.0665758	0	0.129027	0.134986	0.127074	0	0	0	0.440149	0.0852343	0.163465	0.0634649	0.0634125	0	0.200214	0	0.0712822	0.134199	0.0674459	0	0	0	0.0615749	0	0	0.306528	0.059466	0.0678579	0.0658008	BraA01g006920.3C	protein_coding	chrA01:3310261-3313007:-	gi|685257728|ref|XP_009127491.1|	2520	0	PREDICTED: serine carboxypeptidase-like 29 [Brassica rapa]	gi|685257727|ref|XM_009129243.1|	1401	0	PREDICTED: Brassica rapa serine carboxypeptidase-like 29 (LOC103852335), mRNA	Q949Q7	780
BraA01g006930.3C	0	0	0.120765	0	0	0	0	0	0	0	0	0.120129	0	0	0	0	0.161151	0	0.119992	0	0	0	0	0	0	0	0.12236	0.233159	0	0	0	0	0	0	0	0	BraA01g006930.3C	protein_coding	chrA01:3313448-3314286:-	gi|685257730|ref|XP_009127502.1|	373	1e-41	PREDICTED: uncharacterized protein LOC103852344 [Brassica rapa]	gi|685257729|ref|XM_009129254.1|	290	4e-149	PREDICTED: Brassica rapa uncharacterized LOC103852344 (LOC103852344), mRNA	.	.
BraA01g006980.3C	8.62023	8.3744	8.98615	17.7145	18.4199	19.2512	10.4196	8.71586	10.0833	27.2916	23.8043	27.8717	20.7172	21.1172	21.4166	16.2548	17.6538	20.6017	19.9034	18.4001	14.2751	15.1269	10.8913	11.5605	12.2588	10.4771	13.8469	11.2048	13.2048	11.7308	19.8219	17.3255	17.9685	12.8396	10.2759	12.0859	BraA01g006980.3C	protein_coding	chrA01:3323074-3325694:-	gi|685257732|ref|XP_009127511.1|	2403	0	PREDICTED: serine carboxypeptidase-like 29 [Brassica rapa]	gi|685257731|ref|XM_009129263.1|	1299	0	PREDICTED: Brassica rapa serine carboxypeptidase-like 29 (LOC103852355), mRNA	Q949Q7	769
BraA01g006990.3C	30.3362	19.2981	29.3006	17.6036	16.4214	18.1747	12.6799	16.3578	14.5324	12.1953	11.6417	12.0369	9.56375	10.2457	10.3409	8.84828	9.76601	10.7847	11.0519	16.42	15.2729	8.58533	9.477	10.8506	8.13223	9.68073	8.70016	6.32523	6.14255	6.11277	7.53647	7.85537	7.35397	13.1597	11.3398	9.88009	BraA01g006990.3C	protein_coding	chrA01:3342455-3346177:+	gi|685257734|ref|XP_009127520.1|	5372	0	PREDICTED: autophagy-related protein 11-like [Brassica rapa]	gi|685257733|ref|XM_009129272.1|	3387	0	PREDICTED: Brassica rapa autophagy-related protein 11-like (LOC103852366), mRNA	Q9SUG7	1793
BraA01g007000.3C	75.3651	105.993	70.7	41.4909	37.0142	40.095	52.8766	56.4	57.5688	53.5959	54.6887	52.3682	38.9142	41.1922	40.5106	38.802	34.8463	29.5308	20.0187	18.028	18.9811	15.0912	12.6075	12.9067	14.1834	15.196	19.0882	26.4713	24.0005	26.334	14.1073	14.8544	15.219	35.8095	19.0138	16.4966	BraA01g007000.3C	protein_coding	chrA01:3346685-3348845:-	gi|685257736|ref|XP_009127531.1|	2890	0	PREDICTED: uncharacterized protein LOC103852376 [Brassica rapa]	gi|685257735|ref|XM_009129283.1|	1710	0	PREDICTED: Brassica rapa uncharacterized LOC103852376 (LOC103852376), mRNA	.	.
BraA01g007010.3C	0	0.185666	0	0	0.431498	0.713478	0	0	0	0	0	0	0	0	0	0.266948	0	0.247851	0	0.192296	0	0	0.414791	0.216161	0	0	0	0	0	0	0	0	0	0	0.205777	0	BraA01g007010.3C	protein_coding	chrA01:3350257-3350718:+	gi|685257738|ref|XP_009127542.1|	738	1e-97	PREDICTED: uncharacterized protein LOC103852385 [Brassica rapa]	gi|923517057|ref|XM_013795648.1|	462	0	PREDICTED: Brassica napus uncharacterized LOC106355754 (LOC106355754), mRNA	.	.
BraA01g007020.3C	6.84631	3.86629	7.41036	5.34246	5.79876	4.62134	5.9069	7.87049	7.94164	6.72666	7.33467	8.81758	3.73498	3.89384	3.57189	8.20906	7.07217	4.50107	0.885415	0.884684	1.06321	1.96017	2.31005	1.77959	0.640504	0.792384	1.04545	1.72046	1.49078	1.7181	1.17612	1.40903	1.66557	2.48888	0.896877	1.54611	BraA01g007020.3C	protein_coding	chrA01:3355342-3357637:+	gi|923505349|ref|XP_013670367.1|	2376	0	PREDICTED: QWRF motif-containing protein 8-like [Brassica napus]	gi|923506002|ref|XM_013834771.1|	1905	0	PREDICTED: Brassica napus QWRF motif-containing protein 8-like (LOC106394156), mRNA	Q9SUH5	776
BraA01g007030.3C	0.220275	0.179602	0.224842	0.982455	0.626105	1.00075	0.750842	1.05459	0.870927	0.567736	0.554359	0.559143	0.426318	0.630107	0.469633	1.60101	2.40027	1.10288	0.0744676	0.0372031	0	0.0391541	0.0401242	0.0836402	0.0787323	0.118708	0.151874	0.0723495	0.102097	0	0.0391549	0.0388209	0.107901	0.279102	0.0796222	0	BraA01g007030.3C	protein_coding	chrA01:3358052-3360439:+	gi|685257755|ref|XP_009127635.1|	3902	0	PREDICTED: pentatricopeptide repeat-containing protein At4g30700-like [Brassica rapa]	gi|922406513|ref|XM_013749537.1|	2017	0	PREDICTED: Brassica oleracea var. oleracea pentatricopeptide repeat-containing protein At4g30700-like (LOC106312110), mRNA	Q9SUH6	1332
BraA01g007040.3C	8.91705	13.3461	8.87661	22.3636	22.0833	23.3195	22.9576	23.4356	23.7868	15.6556	14.236	14.2532	20.3181	20.1251	20.0684	35.2726	36.0765	24.562	0.179082	0.313135	0.278577	0.329557	0.289476	0.301711	0.331342	0.618526	0.410887	0.130491	0.245525	0.347498	0.329564	0.0466789	0.172989	2.05553	0.430826	0.0464184	BraA01g007040.3C	protein_coding	chrA01:3361287-3364368:+	gi|685258281|ref|XP_009130188.1|	2304	0	PREDICTED: LOW QUALITY PROTEIN: eukaryotic translation initiation factor isoform 4G-2 [Brassica rapa]	gi|685257756|ref|XM_009129395.1|	1352	0	PREDICTED: Brassica rapa eukaryotic translation initiation factor isoform 4G-2-like (LOC103852492), mRNA	O82233	617
BraA01g007050.3C	0.46386	0	0	0	0	0	0	0	0	0.47822	0.500306	0.470982	0	0	0	0	0	0	0	0	0	0	0	0	0	0	0	0	0	0	0	0	0	0	0	0	BraA01g007050.3C	protein_coding	chrA01:3367844-3368223:-	gi|674906464|emb|CDY26602.1|	212	1e-18	BnaA09g46750D [Brassica napus]	gi|923827030|ref|XM_013840755.1|	134	5e-63	PREDICTED: Brassica napus protein TRANSPARENT TESTA 12-like (LOC106400388), mRNA	Q9LPV4	74.7
BraA01g007060.3C	0	0.178704	0	0.168542	0.622975	0	0	0	0.206327	0.376598	0.196995	0	0	0.195924	0	0.256937	0	0	0	0	0	0	0	0	0	0	0	0	0	0	0	0	0	0	0	0	BraA01g007060.3C	protein_coding	chrA01:3375271-3376305:-	gi|674904815|emb|CDY28209.1|	773	1e-101	BnaA01g06400D [Brassica napus]	gi|923868782|ref|XM_013853453.1|	367	0	PREDICTED: Brassica napus protein TRANSPARENT TESTA 12-like (LOC106412545), mRNA	Q9LPV4	268
BraA01g007070.3C	150.413	174.559	143.505	163.726	161.52	169.315	171.361	183.28	194.19	71.2689	67.0115	74.5536	180.822	160.032	180.51	304.179	316.428	553.131	0	0	0	0	0	0	0	0	0	0	0	0	0	0	0	0	0	0	BraA01g007070.3C	protein_coding	chrA01:3381339-3382199:+	gi|685257742|ref|XP_009127571.1|	1168	7e-158	PREDICTED: uncharacterized protein LOC103852415 isoform X1 [Brassica rapa]	gi|685257741|ref|XM_009129323.1|	714	0	PREDICTED: Brassica rapa uncharacterized LOC103852415 (LOC103852415), transcript variant X1, mRNA	.	.
BraA01g007080.3C	0.584464	0.571852	0.29829	0	0.332253	0	0.56921	0.310909	0	0	0	0.296718	0.308499	0.940435	0	0.411099	1.19413	4.58029	0	0	0	0	0	0	0	0	0	0	0	0	0	0	0	0	0	0	BraA01g007080.3C	protein_coding	chrA01:3382830-3383129:-	gi|923505880|ref|XP_013686556.1|	426	3e-47	PREDICTED: cadmium/zinc-transporting ATPase HMA3-like [Brassica napus]	gi|923505879|ref|XM_013831102.1|	233	7e-118	PREDICTED: Brassica napus cadmium/zinc-transporting ATPase HMA3-like (LOC106390571), mRNA	P0CW78	137
BraA01g007090.3C	0	1.07897	0.562812	2.03522	0	0	0	1.17324	0	0	0.594703	0	0	0	0	4.65395	2.25308	3.60086	0	0	0	0	0	0	0	0	0	0	0	0	0	0	0	0	0	0	BraA01g007090.3C	protein_coding	chrA01:3383579-3383899:+	gi|674862535|emb|CDY68846.1|	282	5e-31	BnaUnng03050D [Brassica napus]	gi|923691205|ref|XR_001272915.1|	159	5e-77	PREDICTED: Brassica napus uncharacterized LOC106361453 (LOC106361453), ncRNA	Q0WQF4	74.3
BraA01g007100.3C	0.125421	1.96344	0	0.115737	0.142598	0.353677	3.17585	2.66875	2.55031	0.258608	0.541103	1.01878	1.58884	3.09442	1.11075	0.529312	0	0.491448	0	0	0	0	0	0	0	0	0	0	0	0	0	0	0	0	0	0	BraA01g007100.3C	protein_coding	chrA01:3387205-3387903:+	gi|685257748|ref|XP_009127594.1|	889	4e-118	PREDICTED: E3 ubiquitin-protein ligase RING1-like [Brassica rapa]	gi|923506011|ref|XM_013834963.1|	699	0	PREDICTED: Brassica napus E3 ubiquitin-protein ligase RING1-like (LOC106394358), mRNA	Q6AVN2	84.7
BraA01g007110.3C	212.149	366.755	212.819	127.055	123.317	120.705	229.326	247.631	256.903	149.77	139.412	138.564	124.092	127.501	126.176	217.145	224.41	142.4	0.094994	0	0.197028	0	0	0.106695	0.301302	0.100953	0.290606	0.369168	0.173651	0.092165	0	0.198086	0.183524	1.42413	0.203139	0	BraA01g007110.3C	protein_coding	chrA01:3388776-3390482:-	gi|685257750|ref|XP_009127605.1|	715	1e-90	PREDICTED: uncharacterized protein LOC103852450 [Brassica rapa]	gi|923506015|ref|XM_013835152.1|	494	0	PREDICTED: Brassica napus uncharacterized LOC106394554 (LOC106394554), mRNA	.	.
BraA01g007120.3C	26.2717	53.5675	27.8426	62.0144	64.1275	59.4499	137.817	146.931	142.162	23.2062	23.6832	24.1392	37.2527	40.4286	39.8626	65.4747	68.1225	73.6694	0	0	0	0	0	0	0	0	0	0	0	0.0319151	0	0.0342968	0	0.061644	0	0	BraA01g007120.3C	protein_coding	chrA01:3392195-3397060:-	gi|923622820|ref|XP_013748023.1|	3342	0	PREDICTED: cadmium/zinc-transporting ATPase HMA2-like [Brassica napus]	gi|923622821|ref|XM_013892570.1|	1185	0	PREDICTED: Brassica napus cadmium/zinc-transporting ATPase HMA2-like (LOC106450803), transcript variant X2, mRNA	Q9SZW4	1037
BraA01g007130.3C	0.186372	0.218821	0.114142	0.756719	0.593309	0.700737	0.617128	0.634508	0.547398	0.576426	0.482438	0.378467	0.472193	0.679736	0.623535	1.3109	1.67544	0.778961	0.0756074	0.075545	0.0392046	0.159014	0.0814768	0.169841	0.119906	0.1607	0.115649	0.0367285	0.0345531	0.0733558	0.0795084	0.15766	0.109553	0.283374	0.0404205	0.117585	BraA01g007130.3C	protein_coding	chrA01:3401215-3403566:+	gi|923505995|ref|XP_013690086.1|	3970	0	PREDICTED: pentatricopeptide repeat-containing protein At4g30700-like [Brassica napus]	gi|923505994|ref|XM_013834632.1|	2352	0	PREDICTED: Brassica napus pentatricopeptide repeat-containing protein At4g30700-like (LOC106393980), mRNA	Q9SUH6	1295
BraA01g007140.3C	5.11505	8.37992	5.94962	18.112	19.4303	18.0393	17.1458	18.2664	19.5745	12.182	14.1559	11.9976	17.1202	19.0129	17.5189	35.3088	33.4314	19.9909	10.5764	6.87101	6.67276	14.4627	19.2413	18.6092	20.1108	17.0521	17.3054	14.2217	14.6659	15.0215	12.856	14.9266	14.3343	22.3069	17.4573	19.9301	BraA01g007140.3C	protein_coding	chrA01:3404426-3407636:+	gi|685257757|ref|XP_009127643.1|	3412	0	PREDICTED: eukaryotic translation initiation factor isoform 4G-2-like [Brassica rapa]	gi|685257756|ref|XM_009129395.1|	2154	0	PREDICTED: Brassica rapa eukaryotic translation initiation factor isoform 4G-2-like (LOC103852492), mRNA	O82233	885
BraA01g007150.3C	0	0	0	0.301866	0	0	0.212392	0	0	0	0	0	0.230223	0	0	0	0	0.142422	0	0.220997	0.114688	0	0.119175	0.124212	0.116923	0.235054	0.225545	0.429778	0.303242	0.107297	0.116296	0.461216	0	2.69416	2.48314	1.26126	BraA01g007150.3C	protein_coding	chrA01:3408459-3409468:-	gi|685257759|ref|XP_009127652.1|	1431	0	PREDICTED: uncharacterized protein LOC103852500 [Brassica rapa]	gi|685257758|ref|XM_009129404.1|	804	0	PREDICTED: Brassica rapa uncharacterized LOC103852500 (LOC103852500), mRNA	Q8LFW5	261
BraA01g007160.3C	0	0.733143	0	0.345727	0	0	1.82439	0	0	0.386255	0.808186	1.14122	0	0	0	0	0.510313	0	3.79976	0.379662	0.788112	1.99786	6.96104	8.10881	1.60695	2.01905	0.774949	3.32251	3.12573	2.58062	5.59413	3.56555	4.40458	0.712067	0.812555	0.787923	BraA01g007160.3C	protein_coding	chrA01:3423626-3423949:+	gi|685257761|ref|XP_009127659.1|	346	2e-40	PREDICTED: uncharacterized protein LOC103852510 [Brassica rapa]	gi|685257760|ref|XM_009129411.1|	209	1e-104	PREDICTED: Brassica rapa uncharacterized LOC103852510 (LOC103852510), mRNA	.	.
BraA01g007170.3C	48.449	37.998	43.5661	32.9987	24.0446	28.9146	38.197	32.7273	52.9934	62.2379	71.333	67.5425	62.9176	58.1585	54.485	75.7288	89.0362	78.3471	112.313	85.334	87.7605	55.772	62.1968	73.1477	63.4955	73.3554	60.446	103.056	112.636	109.347	74.2274	79.6932	66.6772	75.6384	87.9805	90.974	BraA01g007170.3C	protein_coding	chrA01:3425531-3426058:-	gi|922406159|ref|XP_013596347.1|	291	4e-32	PREDICTED: UPF0057 membrane protein At4g30660-like [Brassica oleracea var. oleracea]	gi|685257762|ref|XM_009129421.1|	228	3e-115	PREDICTED: Brassica rapa UPF0057 membrane protein At4g30660-like (LOC103852521), mRNA	Q9SUI0	94
BraA01g007180.3C	81.8249	74.722	89.8848	216.093	229.033	209.496	143.441	161.673	163.741	441.072	454.297	426.088	322.073	318.912	373.444	1058.99	1036.51	1003.08	207.862	20.927	25.4087	134.64	238.051	211.717	211.41	68.454	55.2074	196.575	232.971	206.656	161.654	151.623	171.779	220.314	218.87	363.831	BraA01g007180.3C	protein_coding	chrA01:3426650-3426957:-	gi|685257765|ref|XP_009127679.1|	374	5e-45	PREDICTED: UPF0057 membrane protein At4g30650 [Brassica rapa]	gi|685257764|ref|XM_009129431.1|	225	1e-113	PREDICTED: Brassica rapa UPF0057 membrane protein At4g30650 (LOC103852533), mRNA	Q9M095	133
BraA01g007190.3C	1.36375	0.571852	1.69031	1.79778	2.10427	1.19032	0.56921	0.310909	0.330123	1.40597	1.68103	1.78031	3.29066	2.9258	3.25901	3.15176	4.77653	3.18076	2.66743	3.94849	3.48346	2.18167	1.70341	2.33022	6.16264	3.98965	2.92156	7.96665	8.66868	8.24324	7.68793	6.07728	5.24879	1.20339	1.69011	1.12673	BraA01g007190.3C	protein_coding	chrA01:3427460-3428670:-	gi|685257767|ref|XP_009127692.1|	1582	0	PREDICTED: putative F-box/LRR-repeat protein 19 [Brassica rapa]	gi|685257766|ref|XM_009129444.1|	546	0	PREDICTED: Brassica rapa putative F-box/LRR-repeat protein 19 (LOC103852542), mRNA	.	.
BraA01g007210.3C	0	0	0	0	0	0	0	0	0	0	0	0	0	0	0	0	0	0	28.5738	27.8139	30.9062	16.8748	10.8522	10.943	23.4583	25.3196	27.6349	46.0563	44.6754	42.8949	19.458	16.9019	18.8229	19.4087	23.2858	23.8532	BraA01g007210.3C	protein_coding	chrA01:3438915-3441324:-	gi|685257769|ref|XP_009127704.1|	1128	9e-152	PREDICTED: putative F-box/LRR-repeat protein 19 [Brassica rapa]	gi|685257770|ref|XM_009129462.1|	636	0	PREDICTED: Brassica rapa putative F-box/LRR-repeat protein 19 (LOC103852549), transcript variant X2, mRNA	.	.
BraA01g007220.3C	10.9587	25.5684	10.6122	9.33463	10.5427	9.24434	16.9668	20.9266	19.2043	10.7186	11.8197	11.6976	8.00912	9.7962	8.01849	15.8115	17.4144	15.4144	31.348	29.0441	30.8842	23.2252	26.411	32.1685	15.5171	11.66	13.5132	26.9954	24.8756	24.3316	14.8344	15.1536	17.343	41.6559	23.6149	26.1492	BraA01g007220.3C	protein_coding	chrA01:3443002-3443946:-	gi|685257773|ref|XP_009127718.1|	983	3e-133	PREDICTED: uncharacterized protein LOC103852566 [Brassica rapa]	gi|685257772|ref|XM_009129470.1|	624	0	PREDICTED: Brassica rapa uncharacterized LOC103852566 (LOC103852566), mRNA	.	.
BraA01g007230.3C	138.053	83.8577	146.532	73.1447	75.3754	70.8577	119.825	131.444	128.386	198.756	196.478	193.885	127.723	127.085	126.778	64.5156	64.3844	76.784	87.4433	68.4788	74.3058	62.8339	53.7133	58.9479	110.292	122.219	118.068	152.929	153.165	150.452	71.8895	74.6146	74.6881	156.975	114.823	93.757	BraA01g007230.3C	protein_coding	chrA01:3451830-3456471:+	gi|685257775|ref|XP_009127729.1|	2579	0	PREDICTED: signal recognition particle receptor subunit alpha-like [Brassica rapa]	gi|685257774|ref|XM_009129481.1|	1798	0	PREDICTED: Brassica rapa signal recognition particle receptor subunit alpha-like (LOC103852575), mRNA	Q9U5L1	335
BraA01g007240.3C	517.169	358.945	506.38	568.127	570.655	559.556	936.022	1002.22	990.632	678.417	699.828	657.391	850.032	916.831	905.871	343.292	349.676	464.112	277.016	331.413	326.834	425.034	295.848	318.564	650.304	873.641	855.637	257.779	245.533	256.623	753.355	736.464	699.319	391.444	410.324	388.091	BraA01g007240.3C	protein_coding	chrA01:3462720-3463937:-	gi|685257779|ref|XP_009127746.1|	1232	1e-169	PREDICTED: putative glutamine amidotransferase-like protein C13C5.04 [Brassica rapa]	gi|685257778|ref|XM_009129498.1|	753	0	PREDICTED: Brassica rapa putative glutamine amidotransferase-like protein C13C5.04 (LOC103852592), mRNA	Q9M0A7	429
BraA01g007250.3C	1.01879	1.99361	0.875715	3.51309	3.7188	4.13294	6.47542	6.21818	4.96699	5.58333	6.07252	6.36992	3.39632	2.53084	3.79896	1.58405	2.11803	0.840421	2.55595	1.0324	1.35353	3.14526	3.3404	4.21454	3.85225	3.12083	3.66004	3.80412	3.82734	2.84917	2.74501	2.7783	3.72975	3.71973	3.43062	3.27024	BraA01g007250.3C	protein_coding	chrA01:3471492-3475976:+	gi|923929830|ref|XP_013733708.1|	764	1e-94	PREDICTED: probable LRR receptor-like serine/threonine-protein kinase At4g30520 [Brassica napus]	gi|923929829|ref|XM_013878254.1|	460	0	PREDICTED: Brassica napus probable LRR receptor-like serine/threonine-protein kinase At4g30520 (LOC106437355), mRNA	Q8VYT3	278
BraA01g007270.3C	6.96955	9.57074	6.11557	10.3805	10.2873	11.4933	6.07316	7.15481	8.01135	5.04232	6.85775	6.33165	5.93764	5.11534	5.77526	12.0406	9.65965	13.7345	13.2689	13.8775	14.2751	9.38913	12.9626	9.88914	7.47331	5.53508	6.32281	7.10842	6.34736	6.73769	6.12913	7.11121	7.42696	5.92595	5.83408	5.91436	BraA01g007270.3C	protein_coding	chrA01:3481731-3483333:-	gi|685257784|ref|XP_009127778.1|	751	6e-98	PREDICTED: transmembrane protein 208 homolog [Brassica rapa]	gi|685257783|ref|XM_009129530.1|	631	0	PREDICTED: Brassica rapa transmembrane protein 208 homolog (LOC103852632), mRNA	Q54UB0	83.2
BraA01g007280.3C	0	0	0.359386	0.3249	0.400305	0	1.71449	0.374589	0.397738	0.362986	0	0.714984	0.371686	1.13305	0.692915	0	0	0	0	0.713582	0.740636	0.375502	0	0	0	0	0.364133	0	0	0	0.37551	0.744613	0	0.669171	0	0.370229	BraA01g007280.3C	protein_coding	chrA01:3488015-3488575:-	gi|674904796|emb|CDY28190.1|	324	5e-37	BnaA01g06590D [Brassica napus]	gi|567218145|ref|XM_006412639.1|	200	1e-99	Eutrema salsugineum hypothetical protein (EUTSA_v10025952mg) mRNA, complete cds	Q3ZBR5	50.8
BraA01g007290.3C	349.616	151.801	378.557	353.019	344.537	332.623	406.726	429.243	425.358	228.607	235.153	227.124	169.768	174.788	168.353	20.1812	19.0579	13.1857	126.276	108.045	116.053	74.4223	52.2636	48.0166	190.482	185.357	176.759	50.9586	52.5374	45.486	142.047	145.143	143.149	60.5904	64.1475	75.6119	BraA01g007290.3C	protein_coding	chrA01:3489284-3489778:+	gi|674893584|emb|CDY39206.1|	153	1e-10	BnaA03g50180D [Brassica napus]	gi|685257785|ref|XM_009129539.1|	495	0	PREDICTED: Brassica rapa glycine-rich cell wall structural protein 2-like (LOC103852642), mRNA	.	.
BraA01g007300.3C	400.814	339.439	423.08	569.022	610.858	573.571	1259.05	1317.51	1283.24	260.371	282.806	275.758	145.759	184.348	195.224	44.8815	40.8999	34.3172	247.437	214.631	233.484	162.982	108.709	125.52	260.745	197.652	197.143	259.42	252.257	260.646	237.615	272.727	250.313	91.9742	57.5647	81.4741	BraA01g007300.3C	protein_coding	chrA01:3491932-3492258:+	gi|685257788|ref|XP_009127799.1|	161	2e-12	PREDICTED: counting factor 45-1-like [Brassica rapa]	gi|685257787|ref|XM_009129551.1|	327	4e-170	PREDICTED: Brassica rapa counting factor 45-1-like (LOC103852652), mRNA	.	.
BraA01g007310.3C	39.4173	66.5609	38.9165	51.7384	50.6107	52.8936	65.7901	72.0875	73.7786	99.1417	105.26	99.0902	60.4085	69.3298	63.0625	80.2121	81.0899	33.0207	120.827	59.0207	56.9695	63.4206	87.4977	88.5637	74.0391	65.2652	69.4427	269.402	266.549	267.092	53.0569	53.1792	56.5937	114.699	113.788	97.761	BraA01g007310.3C	protein_coding	chrA01:3494594-3495883:+	gi|922417839|ref|XP_013606421.1|	2102	0	PREDICTED: UDP-glucuronate 4-epimerase 1 [Brassica oleracea var. oleracea]	gi|685257789|ref|XM_009129560.1|	1287	0	PREDICTED: Brassica rapa UDP-glucuronate 4-epimerase 1 (LOC103852660), mRNA	Q9M0B6	807
BraA01g007320.3C	4.60827	7.698	5.39217	9.02347	8.6897	6.86722	7.77191	6.57692	5.5867	13.6734	12.0016	9.92866	7.94979	10.1278	10.507	4.26911	3.52116	12.1848	14.7051	11.276	11.2306	8.39103	5.2822	7.55399	12.7752	10.9029	11.973	12.9578	13.2322	10.9492	14.3849	14.7376	14.5351	11.7491	13.2853	13.9462	BraA01g007320.3C	protein_coding	chrA01:3498769-3500084:+	gi|685257794|ref|XP_009127829.1|	1310	0	PREDICTED: tetraspanin-9 [Brassica rapa]	gi|923505937|ref|XM_013833542.1|	780	0	PREDICTED: Brassica napus tetraspanin-9-like (LOC106392719), mRNA	Q9M0B7	368
BraA01g007330.3C	0	0	0.175465	0	0	0	0.0837074	0.182888	0	0.531668	0.370815	0.523621	0	0	0	0.120912	0.117072	0.449048	1.91776	2.43877	2.53123	2.75	2.34845	2.4477	1.01379	0.370556	0.800021	1.43976	0.956104	0.422875	1.55836	2.63571	2.10513	0.408391	0.466024	0.632656	BraA01g007330.3C	protein_coding	chrA01:3500314-3509033:-	gi|923505935|ref|XP_013688925.1|	1593	0	PREDICTED: WAT1-related protein At4g30420-like [Brassica napus]	gi|923505934|ref|XM_013833471.1|	927	0	PREDICTED: Brassica napus WAT1-related protein At4g30420-like (LOC106392644), mRNA	Q9M0B8	505
BraA01g007340.3C	1.64008	0.729403	1.21751	2.61412	3.05131	3.22339	0.726033	1.90352	0.67372	1.99828	2.41219	3.02774	5.19412	4.15839	5.135	6.50208	6.2956	6.03695	3.62916	3.17289	3.60682	6.9966	5.37747	4.5857	4.31662	3.53541	3.85498	2.35062	3.45531	2.34739	2.22624	3.31087	3.06747	3.40048	2.74859	5.01698	BraA01g007340.3C	protein_coding	chrA01:3513414-3514081:+	gi|685257796|ref|XP_009127839.1|	1026	3e-140	PREDICTED: uncharacterized protein LOC103852691 [Brassica rapa]	gi|685257795|ref|XM_009129591.1|	588	0	PREDICTED: Brassica rapa uncharacterized LOC103852691 (LOC103852691), mRNA	Q9M0B9	295
BraA01g007350.3C	0	0	0	0	0	0	0	0	0	0	0	0	0	0	0	0	0	0	0.235223	0	0	0	0	0	0	0	0	0	0	0	0	0	0	0	0	0	BraA01g007350.3C	protein_coding	chrA01:3521843-3522417:-	gi|687567543|ref|NP_001288929.1|	580	1e-74	putative EG45-like domain containing protein 1 precursor [Brassica rapa]	gi|687567542|ref|NM_001302000.1|	378	0	Brassica rapa putative EG45-like domain containing protein 1 (EXPLB2), mRNA	Q9M0C2	182
BraA01g007360.3C	27.2266	34.986	38.7222	36.6814	33.019	40.6062	48.6127	40.3602	33.0123	20.0229	15.8575	23.59	22.2273	24.5331	16.9678	31.407	33.6236	11.1425	32.2153	26.1189	30.5455	26.5207	25.194	25.0183	25.4965	19.5635	19.7107	10.3734	10.0955	10.0019	38.33	33.7805	32.1862	35.1876	19.4862	27.1026	BraA01g007360.3C	protein_coding	chrA01:3524054-3524536:+	gi|685257802|ref|XP_009127869.1|	752	9e-100	PREDICTED: RING-H2 finger protein ATL14 [Brassica rapa]	gi|685257801|ref|XM_009129621.1|	474	0	PREDICTED: Brassica rapa RING-H2 finger protein ATL14 (LOC103852719), mRNA	Q9M0C3	178
BraA01g007370.3C	14.5119	14.7839	13.5512	8.27764	10.8787	8.91896	8.0761	8.69527	7.47618	10.481	10.0191	10.4843	7.02856	7.6552	7.64995	8.41267	7.54818	9.99791	8.65287	13.0494	11.5314	6.63302	6.75379	6.35802	6.49794	7.99248	6.9682	10.7245	10.9763	10.6705	6.88827	7.3354	7.18673	17.0109	11.889	10.5225	BraA01g007370.3C	protein_coding	chrA01:3525823-3529539:+	gi|923505929|ref|XP_013688788.1|	3603	0	PREDICTED: probable cyclic nucleotide-gated ion channel 17 [Brassica napus]	gi|685257803|ref|XM_009129631.1|	2079	0	PREDICTED: Brassica rapa probable cyclic nucleotide-gated ion channel 17 (LOC103852730), mRNA	Q8L7Z0	1238
BraA01g007380.3C	7.34625	9.37254	6.34238	15.738	16.7782	15.8486	9.01407	8.6421	9.02994	7.2734	7.43477	8.28051	6.18365	5.34614	6.08238	5.14443	5.1133	5.32592	9.22294	13.741	13.9556	17.1538	24.0514	21.0866	12.6313	15.2777	13.6891	7.90829	7.85989	7.61081	11.0794	9.3423	9.63837	21.8044	21.3019	20.452	BraA01g007380.3C	protein_coding	chrA01:3533019-3535893:-	gi|685257806|ref|XP_009127888.1|	4145	0	PREDICTED: chaperone protein ClpB1 [Brassica rapa]	gi|685257805|ref|XM_009129640.1|	2706	0	PREDICTED: Brassica rapa chaperone protein ClpB1 (LOC103852740), mRNA	Q9M0C5	1309
BraA01g007390.3C	3.6826	2.55706	3.4558	2.19241	2.161	2.45657	2.25602	2.97007	3.08651	4.96008	4.036	4.1613	2.32001	2.86718	3.15614	2.59026	2.02258	2.24981	4.63849	3.25028	5.37262	3.104	2.66157	3.24769	3.12081	2.17664	2.08858	5.38445	5.23072	4.85103	1.8371	2.13547	2.444	2.76577	2.18993	2.31092	BraA01g007390.3C	protein_coding	chrA01:3545120-3547770:+	gi|685257808|ref|XP_009127899.1|	2543	0	PREDICTED: diacylglycerol kinase 7 [Brassica rapa]	gi|923505924|ref|XM_013833177.1|	1476	0	PREDICTED: Brassica napus diacylglycerol kinase 7 (LOC106392327), mRNA	F4JQ95	903
BraA01g007400.3C	2.24794	3.38374	1.76503	1.9148	3.53879	2.43807	1.01043	3.6794	1.36737	2.31753	2.23805	2.28245	2.19053	2.96784	1.02092	0.729762	0.235529	0.225853	0.175373	0.876143	0.90936	0	0.377975	0.196975	0.55625	0.372749	0	0.851926	0.961762	0.510452	1.29095	2.01134	0.338814	0.492969	1.5001	1.2728	BraA01g007400.3C	protein_coding	chrA01:3548674-3549180:-	gi|685257810|ref|XP_009127912.1|	894	5e-121	PREDICTED: pathogenesis-related protein PR-1-like [Brassica rapa]	gi|923520850|ref|XM_013812474.1|	507	0	PREDICTED: Brassica napus pathogenesis-related protein PR-1-like (LOC106372290), mRNA	Q40374	186
BraA01g007410.3C	0	0	0	0	0	0	0	0	0	0	0	0	0	0	0	0	0	0	0	0	0	0.0840073	0	0	0	0	0	0	0	0	0	0	0	0	0	0	BraA01g007410.3C	protein_coding	chrA01:3553696-3554882:+	gi|674904783|emb|CDY28177.1|	1697	0	BnaA01g06720D [Brassica napus]	gi|923771235|ref|XM_013824170.1|	651	0	PREDICTED: Brassica napus F-box/kelch-repeat protein At5g39560-like (LOC106384162), mRNA	Q6NL02	182
[truncated: 37,611 more rows]
[truncated: 14 more columns]
