# Supplementary material for: Transcriptome and Coexpression Network Analyses Reveal Hub Genes in Chinese Cabbage (Brassica rapa L. ssp. pekinensis) During Different Stages of Plasmodiophora brassicae Infection
Source: Front Plant Sci. 2021 Aug 10;12:650252. doi: 10.3389/fpls.2021.650252 (PMC8383047; doi:10.3389/fpls.2021.650252)
Supplement: Supplementary Table 2 — The information of the primers used in qRT-PCR. [file Table_2.XLSX]

## Sheet: Sheet1
Table S2 The information of the primers used in qRT-PCR
Gene ID	Gene description	primer (5'-3')	sequence (5'-3')	amplification efficiency
BraA03g026740.3C	Protein EXORDIUM	F	CCGAACAACGATGTGGGACT	1.06694
		R	CCATAAACACCAGGACACGC
BraA10g029980.3C	Protein IQ-DOMAIN 14-like isoform X2	F	CTAACACTGAGTCATACAGAGCGAAA	1.12225
		R	AAACCCCTCCATAATCCGAAC
BraA03g022160.3C	Probable protein kinase At2g41970	F	ACCTCACAGTTATCGGTTGTATCG	1.14786
		R	CCCGTGTAAGACATCGTGTAAAGA
BraA10g007340.3C	WAT1-related protein At1g44800	F	AGTGTAGTATGGGGAAAAAGTAAAGAC	1.09524
		R	GCTCCTAATACATCACCGTTCGT
BraA05g011140.3C	Dormancy-associated protein homolog 1	F	AAAGGTGTAGGAGAAGGGAGCAG	1.02489
		R	ACGGTGGGAGAGTTTGGGTG
BraA03g017900.3C	Dormancy-associated protein homolog 1	F	ACATCAAAGGTGTAGGAGAAGGGAG	1.14693
		R	GAGAGGGCTTGTCGAAGAGGTTAG
BraA03g024150.3C	Jasmonic acid-amido synthetase JAR1	F	ATTGATGACAACGGGAGAGC	1.05122
		R	AGATAACTTCGTCGGGACTACA
BraA03g056430.3C	Serine/threonine-protein kinase STY13	F	CCCCAACATCGTTAGGTTCATC	1.09078
		R	GCCAACTTCAAAGGCACAGCT
BraA01g017630.3C	Mitogen-activated protein kinase kinase kinase 17	F	AACAGAGATGGACGGTGGAAG	1.14911
		R	GCACCCGAGTAATCAGCAAA
GAPDH		F	GACTGGAGAGGTGGAAGAGCC
		R	ACTGAAACATCAACGGTGGGA
