# Supplementary material for: Transcriptome and Coexpression Network Analyses Reveal Hub Genes in Chinese Cabbage (Brassica rapa L. ssp. pekinensis) During Different Stages of Plasmodiophora brassicae Infection
Source: Front Plant Sci. 2021 Aug 10;12:650252. doi: 10.3389/fpls.2021.650252 (PMC8383047; doi:10.3389/fpls.2021.650252)
Supplement: Supplementary Table 3 — The disease index, root hair and cortical infection rates of DH40R and DH199S. [file Table_3.XLSX]

## Sheet: disease index 
Table S3 The disease index of DH40R and DH199S.
genotype	Number of plants investigated	disease scale				Disease index (DI)	remarks
		0	1	2	3
DH40R	40	40	0	0	0	0	immunity
DH199S	40	0	0	6	34	95	clubroot-susceptible

## Sheet: rate of root hair infection
Table S3 The rate of root hair infection.
days after inoculation (dai)	the rate of root hair infection (%)
	DH199S			DH40R
	replicate 1	replicate 2	replicate 3	replicate 1	replicate 2	replicate 3
0.5	37.6667	37	37.3333	20.6667	25.3333	26.6667
1	60	56.6667	60	51.6667	48.3333	45
2	71.6667	85	71.6667	66.6667	61.6667	65
4	82.6667	81.6667	91.6667	81.6667	82.6667	67.6667
5	85	68.3333	85	60	60	60
6	55	65	65	41.6667	40	36.6667
8	53.3333	55	48.3333	28.3333	38.3333	38.3333
10	33.3333	38.3333	31.6667	21.6667	28.3333	21.6667
13	48.3333	51.6667	41.6667	31.6667	38.3333	45

## Sheet: number of cortical infection
Table S3 The number of cortical infection.
days after inoculation (dai)	the number of cortical infection
	DH199S			DH40R
	replicate 1	replicate 2	replicate 3	replicate 1	replicate 2	replicate 3
5	17	18	20	5	4	6
8	64	59	76	33	30	31
13	120	117	110	37	27	36
22	189	176	169	37	45	39
