# Supplementary material for: Transcriptome and Coexpression Network Analyses Reveal Hub Genes in Chinese Cabbage (Brassica rapa L. ssp. pekinensis) During Different Stages of Plasmodiophora brassicae Infection
Source: Front Plant Sci. 2021 Aug 10;12:650252. doi: 10.3389/fpls.2021.650252 (PMC8383047; doi:10.3389/fpls.2021.650252)
Supplement: Supplementary Table 4 — Sample description and mapping rate for samples. [file Table_4.XLSX]

## Sheet: Sheet1
Table S4 Sample description and mapping rate for samples
Sample	Raw Reads	Clean Reads	Clean Bases	Raw Q30 Rate (%)	Clean Q30 Rate (%)	Mapping Rate（%）
DH199S0d_1	30420288	29138332	4.37G	92.9	93.32	90.06
DH199S0d_2	32879600	30277906	4.54G	92.67	93.23	89.54
DH199S0d_3	29425556	28089694	4.21G	93.03	93.47	91.05
DH199S2d_1	33326674	31511808	4.73G	92.61	93.07	90.59
DH199S2d_2	27215168	25602120	3.84G	92.47	92.98	90.61
DH199S2d_3	32286150	30757148	4.61G	92.59	93.06	90.81
DH199S5d_1	28863782	27149014	4.07G	93.12	93.64	90.61
DH199S5d_2	29284100	27551428	4.13G	93.58	94.09	89.73
DH199S5d_3	27595616	26052282	3.91G	93.37	93.88	89.58
DH199S8d_1	28933378	27767814	4.17G	93.99	94.32	91.35
DH199S8d_2	28002368	26737464	4.01G	93.29	93.67	90.98
DH199S8d_3	29791456	28288768	4.24G	93.44	93.88	91.18
DH199S13d_1	29711406	28177172	4.23G	93.68	94.09	88.25
DH199S13d_2	29145958	27681252	4.15G	93.59	94.01	88.51
DH199S13d_3	31800534	30112244	4.52G	93.48	93.94	88.51
DH199S22d_1	31787886	29744136	4.46G	93.76	94.27	63.6
DH199S22d_2	32462112	30592728	4.59G	93.59	94.12	63.79
DH199S22d_3	31829520	30183134	4.53G	92.91	93.34	67.6
DH40R0d_1	30530352	28911622	4.34G	92.98	93.43	90.21
DH40R0d_2	30797592	28995416	4.35G	92.59	93.08	89.98
DH40R0d_3	29357210	27792484	4.17G	92.85	93.34	90.17
DH40R2d_1	28966548	27568776	4.14G	93.46	93.88	89.96
DH40R2d_2	29082856	27427732	4.11G	93.38	93.86	88.97
DH40R2d_3	27823532	26163850	3.92G	93.91	94.41	89.21
DH40R5d_1	28481000	27269250	4.09G	93.81	94.15	89.96
DH40R5d_2	28284972	26976256	4.05G	93.3	93.68	90.18
DH40R5d_3	29725450	28055998	4.21G	93.49	93.94	90.34
DH40R8d_1	31780750	29993054	4.50G	93.64	94.11	89.53
DH40R8d_2	33939266	31960052	4.79G	93.35	93.86	89.31
DH40R8d_3	31719962	29880738	4.48G	93.52	94	89.59
DH40R13d_1	28872678	27583448	4.14G	94.08	94.45	89.7
DH40R13d_2	29504974	27807536	4.17G	94.04	94.47	89.68
DH40R13d_3	31854880	30016330	4.50G	93.72	94.21	89.71
DH40R22d_1	31921228	30116502	4.79G	93.02	93.46	80.01
DH40R22d_2	31360226	29593300	4.44G	92.65	93.1	82.8
DH40R22d_3	33444774	31630600	4.74G	93.01	93.46	80.01
