# Supplementary material for: Transcriptome and Coexpression Network Analyses Reveal Hub Genes in Chinese Cabbage (Brassica rapa L. ssp. pekinensis) During Different Stages of Plasmodiophora brassicae Infection
Source: Front Plant Sci. 2021 Aug 10;12:650252. doi: 10.3389/fpls.2021.650252 (PMC8383047; doi:10.3389/fpls.2021.650252)
Supplement: Supplementary Table 5 — The FPKM and annotation of rDEGs. [file Table_5.XLSX]

## Sheet: Sheet1
Table S5 The FPKM and annotation of rDEGs.
name	DH199S0d1	DH199S0d2	DH199S0d3	DH199S2d1	DH199S2d2	DH199S2d3	DH199S5d1	DH199S5d2	DH199S5d3	DH199S8d1	DH199S8d2	DH199S8d3	DH199S13d1	DH199S13d2	DH199S13d3	DH199S22d1	DH199S22d2	DH199S22d3	DH40R0d1	DH40R0d2	DH40R0d3	DH40R2d1	DH40R2d2	DH40R2d3	DH40R5d1	DH40R5d2	DH40R5d3	DH40R8d1	DH40R8d2	DH40R8d3	DH40R13d1	DH40R13d2	DH40R13d3	DH40R22d1	DH40R22d2	DH40R22d3	GeneName	Biotype	Position	NR:Seq-id	NR:Score	NR:Evalue	NR:Description	NT:Seq-id	NT:Score	NT:Evalue	NT:Description	Uniprot:UniProtKB-AC	Uniprot:Score
BraA01g000090.3C	263.266	344.217	257.819	201.847	198.826	201.889	190.12	202.282	193.606	16.3082	18.5016	17.3651	57.9046	54.5419	52.9636	26.949	24.6242	37.1629	158.869	225.459	241.57	222.275	231.767	243.669	223.148	191.641	185.534	34.0076	35.8021	31.1307	109.222	108.454	106.871	45.0479	48.1193	60.5939	BraA01g000090.3C	protein_coding	chrA01:29350-32812:+	gi|923503295|ref|XP_013673639.1|	2557	0	PREDICTED: RAF proto-oncogene serine/threonine-protein kinase-like isoform X2 [Brassica napus]	gi|685255996|ref|XM_009129333.1|	1459	0	PREDICTED: Brassica rapa probable serine/threonine-protein kinase drkD (LOC103851482), transcript variant X2, mRNA	F4JTP5	805
BraA01g000270.3C	187.013	131.852	191.214	127.432	120.984	125.028	111.445	109.325	108.546	181.995	182.435	183.191	194.824	206.061	207.231	73.1712	81.7721	124.776	125.72	126.824	127.706	66.2292	45.6518	51.2901	125.512	114.263	114.65	94.4448	88.0413	92.6739	97.2284	98.9182	101.527	98.48	69.6656	78.409	BraA01g000270.3C	protein_coding	chrA01:143038-144359:-	gi|685256046|ref|XP_009150026.1|	1779	0	PREDICTED: cysteine proteinase RD19a [Brassica rapa]	gi|685256045|ref|XM_009151778.1|	1101	0	PREDICTED: Brassica rapa cysteine proteinase RD19a (LOC103873055), mRNA	P43296	654
BraA01g000480.3C	28.1481	22.3768	25.3397	72.4223	69.4509	72.393	47.8784	49.1839	48.1383	25.0898	29.3055	23.3207	65.6206	69.6153	67.8987	70.808	80.1413	110.933	15.8599	18.818	19.9427	38.8802	38.1344	37.1855	27.9818	34.1308	30.6273	14.9272	13.0465	11.9254	31.2715	23.4603	26.5232	31.3	26.9203	26.5153	BraA01g000480.3C	protein_coding	chrA01:235870-237565:+	gi|685256111|ref|XP_009125168.1|	1582	0	PREDICTED: shikimate kinase 2, chloroplastic [Brassica rapa]	gi|685256110|ref|XM_009126920.1|	886	0	PREDICTED: Brassica rapa shikimate kinase 2, chloroplastic (LOC103850170), mRNA	Q8GY88	482
BraA01g000520.3C	51.5334	138.351	55.4884	32.766	29.6527	34.2623	108.334	122.023	110.751	85.5243	72.8671	79.763	47.1042	64.7181	68.0249	35.3634	39.3764	95.628	26.7699	45.5349	48.5833	43.2312	26.1006	26.1299	43.8022	61.3011	69.2205	40.2512	29.7112	30.9199	41.2213	44.5247	44.3299	38.2219	36.4601	32.0507	BraA01g000520.3C	protein_coding	chrA01:257165-257551:+	gi|674890780|emb|CDY41988.1|	413	2e-50	BnaA01g05600D [Brassica napus]	gi|199580329|gb|AC189635.2|	173	2e-84	Brassica rapa subsp. pekinensis clone KBrS004J05, complete sequence	.	.
BraA01g000660.3C	1.6892	2.14858	1.72422	2.72785	2.68875	2.77865	5.92242	7.63794	5.15221	24.7292	27.9665	27.0991	7.57874	8.51647	8.31098	2.73274	1.72562	1.87536	1.8845	0.855885	1.15484	1.44123	2.67696	2.40526	2.08299	0.72826	1.48495	3.91147	5.55885	3.82298	3.423	4.37622	3.64078	2.08681	2.83925	2.48674	BraA01g000660.3C	protein_coding	chrA01:335385-337421:-	gi|685256152|ref|XP_009127222.1|	1867	0	PREDICTED: probable trehalose-phosphate phosphatase H [Brassica rapa]	gi|923503468|ref|XM_013804789.1|	1038	0	PREDICTED: Brassica napus probable trehalose-phosphate phosphatase H (LOC106365006), mRNA	Q8GWG2	657
BraA01g000670.3C	49.479	20.3348	49.5356	60.5534	64.8913	58.4086	35.0362	36.9275	31.7013	18.7076	19.1164	19.3885	34.7479	39.8355	36.3343	11.4277	11.2085	30.866	103.038	145.395	156.789	167.76	147.011	157.431	125.907	103.816	107.581	33.3691	36.5759	33.0117	119.831	123.494	112.555	116.195	103.764	99.5087	BraA01g000670.3C	protein_coding	chrA01:350105-350935:-	gi|685256155|ref|XP_009127404.1|	1245	1e-170	PREDICTED: ethylene-responsive transcription factor ERF060 [Brassica rapa]	gi|685256154|ref|XM_009129156.1|	831	0	PREDICTED: Brassica rapa ethylene-responsive transcription factor ERF060 (LOC103852206), mRNA	O65665	363
BraA01g000690.3C	21.7976	40.5452	22.983	28.514	31.0466	31.972	43.1573	39.2459	45.4595	34.8199	31.5193	34.7793	16.4364	20.8129	14.378	7.41326	7.83038	9.38585	40.5702	47.8187	47.8681	49.3047	42.4107	46.9317	44.9484	41.3079	44.0959	16.7578	18.2078	24.0415	50.583	47.6186	48.342	21.397	22.3386	25.9433	BraA01g000690.3C	protein_coding	chrA01:362730-363409:+	gi|685256160|ref|XP_009127647.1|	646	1e-84	PREDICTED: uncharacterized protein LOC103852462 [Brassica rapa]	gi|685256159|ref|XM_009129399.1|	366	0	PREDICTED: Brassica rapa uncharacterized LOC103852462 (LOC103852462), mRNA	Q8LGS1	47.8
BraA01g000700.3C	11.552	21.0388	10.9743	25.5946	26.5933	27.8989	33.6402	35.5324	46.1914	29.4793	28.8053	34.5494	35.0156	31.3478	32.9203	18.9862	17.6043	24.724	58.5222	47.405	44.7512	35.6801	29.3763	32.1162	14.4719	17.3204	16.4423	40.2343	35.3596	36.071	22.7503	21.2258	24.0355	3.20639	2.35657	3.6081	BraA01g000700.3C	protein_coding	chrA01:365090-367609:-	gi|685256162|ref|XP_009127742.1|	2708	0	PREDICTED: inositol-3-phosphate synthase [Brassica rapa]	gi|685256161|ref|XM_009129494.1|	1533	0	PREDICTED: Brassica rapa inositol-3-phosphate synthase (LOC103852564), mRNA	Q96348	1038
BraA01g000760.3C	4.47674	10.342	2.7925	11.9342	12.0177	12.5071	10.052	8.99651	11.0977	12.3076	11.1323	9.21721	8.92679	11.6054	8.56561	21.5171	24.3908	20.4651	24.3411	19.1544	14.3872	26.2596	36.0162	39.6632	12.8009	7.50573	7.58791	18.3799	15.2163	15.2955	18.4351	16.5684	20.2236	8.2721	6.47278	9.28408	BraA01g000760.3C	protein_coding	chrA01:388273-390212:-	gi|685256185|ref|XP_009128801.1|	1218	5e-168	PREDICTED: uncharacterized protein LOC103853564 isoform X2 [Brassica rapa]	gi|685256184|ref|XM_009130553.1|	705	0	PREDICTED: Brassica rapa uncharacterized LOC103853564 (LOC103853564), transcript variant X2, mRNA	.	.
BraA01g000770.3C	56.8229	43.6831	46.4007	44.1954	44.3004	40.0588	20.1595	23.3182	24.7592	43.9365	40.2746	39.9746	44.561	33.9602	41.137	53.1003	63.5765	55.1332	2.0582	2.4678	1.28068	1.73148	2.21798	2.31172	4.35214	0.437462	0.419764	5.59905	6.77241	6.39011	5.62743	8.15455	3.57872	9.25687	11.4435	17.4984	BraA01g000770.3C	protein_coding	chrA01:392146-392454:+	gi|674876078|emb|CDY56500.1|	186	4e-16	BnaAnng14350D [Brassica napus]	.	.	.	.	.	.
BraA01g000880.3C	21.4135	14.5428	18.6003	17.1254	16.8036	15.9446	12.5128	13.0439	9.39143	11.4278	11.5027	10.0611	3.81192	3.96352	4.54477	1.18132	1.71571	1.20649	13.5416	12.5943	15.4565	15.046	13.9503	17.1227	13.4166	10.5896	10.248	12.2462	11.1317	11.8988	7.52314	8.16935	8.14467	1.67581	3.64249	3.09056	BraA01g000880.3C	protein_coding	chrA01:435046-437509:-	gi|685256209|ref|XP_009129882.1|	1587	0	PREDICTED: serine/threonine-protein kinase SRK2F [Brassica rapa]	gi|953067422|gb|KT236166.1|	1044	0	Brassica rapa subsp. chinensis cultivar suzhouqing sucrose non-fermenting 1-related protein kinase 2 (SnRK2.7) mRNA, complete cds	Q9SMQ4	559
BraA01g000950.3C	3.90946	4.82918	4.83849	5.231	7.11178	6.06337	9.04263	3.27546	4.19554	3.52667	4.42745	6.20231	4.28185	3.09285	4.424	4.67471	4.65938	4.7871	3.02329	0.44569	0.35979	1.1466	4.05912	0.779336	0.681205	0.579381	0.454861	0.674133	0.951308	0.721292	3.07503	0.516747	3.15981	1.20742	4.02745	3.80258	BraA01g000950.3C	protein_coding	chrA01:445524-447994:-	gi|685256221|ref|XP_009130407.1|	3106	0	PREDICTED: protein SCAI homolog [Brassica rapa]	gi|685256220|ref|XM_009132159.1|	1764	0	PREDICTED: Brassica rapa protein SCAI homolog (LOC103855172), transcript variant X1, mRNA	Q8C8N2	240
BraA01g001010.3C	42.4142	58.178	41.6363	30.5248	34.6097	36.6252	78.6617	72.9772	80.4675	59.4189	60.6308	61.1982	51.2023	45.9333	56.1141	15.9872	18.7965	15.9038	10.0852	11.9277	8.75133	7.79167	3.77056	5.08579	15.6677	16.6236	19.0993	15.5974	18.436	16.9737	28.3536	27.0388	26.0451	1.15711	1.54047	1.06698	BraA01g001010.3C	protein_coding	chrA01:474450-474881:-	gi|923521442|ref|XP_013669444.1|	156	4e-11	PREDICTED: classical arabinogalactan protein 3-like [Brassica napus]	gi|685256232|ref|XM_009132732.1|	432	0	PREDICTED: Brassica rapa classical arabinogalactan protein 3-like (LOC103855682), mRNA	Q9ZT17	51.6
BraA01g001020.3C	81.2267	34.4462	86.1988	46.714	44.2132	44.1233	32.2702	30.8461	31.1927	21.5877	20.5992	25.9337	20.1618	17.5252	17.2083	2.9133	8.14893	10.519	49.2413	49.2006	45.4995	29.6942	26.6577	28.5707	25.167	32.4893	25.7015	10.8832	12.7982	8.15116	23.8049	21.6553	24.572	27.5519	29.1944	21.5345	BraA01g001020.3C	protein_coding	chrA01:478229-478609:+	gi|923507475|ref|XP_013732208.1|	444	5e-54	PREDICTED: uncharacterized protein LOC106435796 [Brassica napus]	gi|685256234|ref|XM_009132839.1|	352	0	PREDICTED: Brassica rapa uncharacterized LOC103855772 (LOC103855772), mRNA	.	.
BraA01g001030.3C	1.50721	1.02409	1.53846	5.67923	5.71209	6.8869	4.15898	1.33628	1.60805	2.41714	2.30298	2.42306	4.33137	4.40127	4.86133	3.88718	3.64969	5.6324	6.92122	6.1094	5.72454	11.654	19.081	20.6028	10.7744	9.11525	8.35679	1.44388	1.55241	1.4007	11.3863	11.0679	12.5101	23.0361	19.5223	15.7167	BraA01g001030.3C	protein_coding	chrA01:480137-483142:+	gi|685256239|ref|XP_009131305.1|	3206	0	PREDICTED: nucleobase-ascorbate transporter 11 [Brassica rapa]	gi|685256238|ref|XM_009133057.1|	2094	0	PREDICTED: Brassica rapa nucleobase-ascorbate transporter 11 (LOC103855962), mRNA	Q6SZ87	1000
BraA01g001050.3C	0.131834	0.47296	0.0897114	0.121654	0.199852	0.206533	0.427977	0.981818	0.744638	0.453051	0.331782	0.401574	0	0.188558	0.0864842	0.123639	0.0598563	0.516574	0.356549	0.267191	0.277321	0.140602	0.240142	0.150175	0.141363	0.521007	0.49993	0.303106	0.203681	0.432413	0.374945	0.185873	0.258314	1.58689	1.28665	1.34006	BraA01g001050.3C	protein_coding	chrA01:487213-490731:+	gi|685256241|ref|XP_009131413.1|	3563	0	PREDICTED: rhamnogalacturonate lyase B [Brassica rapa]	gi|685256240|ref|XM_009133165.1|	1995	0	PREDICTED: Brassica rapa rhamnogalacturonate lyase B (LOC103856050), mRNA	Q8RJP2	140
BraA01g001090.3C	0.694138	1.49415	1.06279	6.66161	5.36656	7.1119	4.19133	5.46491	4.70484	8.80221	6.21401	6.13171	3.2975	4.31871	3.82502	7.22597	5.10555	4.98646	3.80156	2.11024	2.19024	4.44181	3.03457	5.45588	5.2846	3.29187	4.4509	6.01893	6.49894	6.28386	3.33142	2.8626	3.40021	0.989452	1.12908	0.656914	BraA01g001090.3C	protein_coding	chrA01:504964-508673:-	gi|923521263|ref|XP_013669015.1|	1719	0	PREDICTED: probable cinnamyl alcohol dehydrogenase 6 [Brassica napus]	gi|685256248|ref|XM_009133588.1|	1063	0	PREDICTED: Brassica rapa probable cinnamyl alcohol dehydrogenase 6 (LOC103856448), mRNA	O65621	602
BraA01g001220.3C	0.124354	0.304176	0	2.40979	2.54492	1.16889	1.15053	1.98453	1.2643	1.15383	1.27418	1.83082	3.74137	3.26818	2.75323	9.44653	7.96088	6.0096	2.20709	0.945116	2.68126	2.98404	3.12593	2.54978	0.933396	0.938216	1.28609	3.92104	3.51589	3.48737	5.76927	6.50903	6.82241	11.4628	12.9456	12.9454	BraA01g001220.3C	protein_coding	chrA01:599185-600948:-	gi|685256280|ref|XP_009133375.1|	2526	0	PREDICTED: 1-aminocyclopropane-1-carboxylate synthase 8 [Brassica rapa]	gi|685256279|ref|XM_009135127.1|	1410	0	PREDICTED: Brassica rapa 1-aminocyclopropane-1-carboxylate synthase 8 (LOC103857842), mRNA	Q9T065	903
BraA01g001240.3C	0.267612	0.261837	0.819479	17.4345	18.0123	16.9542	6.82844	5.46653	6.10667	5.29721	6.00367	5.32572	7.91024	7.23412	7.63666	34.4088	33.0974	17.4068	4.12545	0.976274	1.51993	18.4945	37.7885	34.3862	24.3337	11.3644	8.80121	5.643	6.15222	5.8459	18.2665	18.4503	22.2326	13.0715	12.4205	16.9403	BraA01g001240.3C	protein_coding	chrA01:614222-616621:-	gi|923918785|ref|XP_013728759.1|	2590	0	PREDICTED: AP2-like ethylene-responsive transcription factor ANT [Brassica napus]	gi|923918784|ref|XM_013873305.1|	1615	0	PREDICTED: Brassica napus AP2-like ethylene-responsive transcription factor ANT (LOC106432465), mRNA	Q38914	851
BraA01g001250.3C	0.345428	1.48708	0.423107	2.80505	3.06333	3.31185	2.89315	3.08704	3.35586	2.0655	2.83152	2.17453	3.5007	2.59379	2.78722	6.70587	7.05752	9.4746	2.59246	1.6102	1.52592	3.75769	4.22832	3.54136	2.07421	1.26585	1.35754	2.11028	1.79317	2.17536	1.62099	1.82633	1.48902	0.525213	1.72308	1.16233	BraA01g001250.3C	protein_coding	chrA01:631388-633122:+	gi|674958280|emb|CDX75672.1|	1696	0	BnaA01g00300D [Brassica napus]	gi|685256285|ref|XM_009135456.1|	959	0	PREDICTED: Brassica rapa growth-regulating factor 2 (LOC103858126), mRNA	Q8L8A8	423
BraA01g001260.3C	30.5246	20.8367	36.8334	19.9794	21.388	21.3523	78.6985	87.4825	82.8649	26.3466	26.9254	25.8277	12.6147	13.7068	15.3676	4.99311	5.47915	10.3536	23.8785	20.7415	23.3945	31.0405	34.2664	36.9276	46.4323	47.5647	48.0876	44.8831	48.2568	42.7258	20.1893	24.6461	20.0524	46.3218	51.7042	40.3085	BraA01g001260.3C	protein_coding	chrA01:633994-634734:-	gi|685256288|ref|XP_009133819.1|	924	5e-123	PREDICTED: light-inducible protein CPRF2-like [Brassica rapa]	gi|685256287|ref|XM_009135571.1|	741	0	PREDICTED: Brassica rapa light-inducible protein CPRF2-like (LOC103858218), mRNA	.	.
BraA01g001300.3C	320.442	244.753	298.29	271.537	273.511	280.549	293.864	325.418	318.855	44.9106	48.7498	49.8487	98.8843	95.2975	92.3259	15.567	17.4078	36.0316	140.919	181.788	187.123	310.171	256.533	270.66	212.162	216.617	218.25	66.6511	62.9202	58.0478	117.937	120.804	115.282	38.6567	41.4078	48.7567	BraA01g001300.3C	protein_coding	chrA01:654212-655623:+	gi|923503536|ref|XP_013682869.1|	1891	0	PREDICTED: BTB/POZ and TAZ domain-containing protein 5-like [Brassica napus]	gi|685256297|ref|XM_009136091.1|	1125	0	PREDICTED: Brassica rapa BTB/POZ and TAZ domain-containing protein 5-like (LOC103858660), mRNA	Q6EJ98	638
BraA01g001410.3C	5.71403	21.724	10.3318	187.712	183.203	184.456	69.3228	64.0924	73.0328	62.4438	64.2711	65.8085	123.744	108.929	121.932	172.708	199.467	155.235	33.4464	11.4153	13.5652	56.5876	59.7739	48.5384	49.0163	40.2954	37.821	36.5167	34.9592	32.7716	47.3604	51.0996	50.5419	35.6829	34.6993	36.3941	BraA01g001410.3C	protein_coding	chrA01:709951-710628:+	gi|685256319|ref|XP_009135615.1|	128	7e-07	PREDICTED: lysine-rich arabinogalactan protein 18 [Brassica rapa]	gi|923520093|ref|XM_013809890.1|	537	0	PREDICTED: Brassica napus lysine-rich arabinogalactan protein 18-like (LOC106369775), mRNA	.	.
BraA01g001460.3C	0.144669	0.636964	0.147668	1.80223	2.05602	1.69981	3.80413	2.69352	2.45141	3.35583	3.51081	3.23159	2.749	3.41412	2.56241	0.712301	1.28083	1.60613	2.20085	1.83253	1.82592	2.00578	1.8183	2.05995	1.86151	1.32538	2.16947	1.85315	2.21277	1.49472	1.62008	1.3768	1.34645	7.08013	5.09858	10.8008	BraA01g001460.3C	protein_coding	chrA01:730999-732750:-	gi|685256334|ref|XP_009136332.1|	1907	0	PREDICTED: cytochrome P450 81F1 [Brassica rapa]	gi|923503819|ref|XM_013881785.1|	1129	0	PREDICTED: Brassica napus cytochrome P450 81F1-like (LOC106440154), mRNA	O65790	669
BraA01g001500.3C	0.195473	0	0.0997626	0.541138	0.888972	0.551215	0.0951856	0	0	3.02286	2.95164	4.16795	0.825416	1.67748	1.34643	0	0.133125	0.127656	1.68511	1.08946	1.43916	0.416946	0.320457	0.111334	1.78161	1.47479	1.41512	1.92609	1.35901	1.05789	2.91868	2.89378	2.5853	0.278635	0	0.41109	BraA01g001500.3C	protein_coding	chrA01:752745-753641:-	gi|685256342|ref|XP_009136769.1|	1500	0	PREDICTED: cytochrome P450 81F1 [Brassica rapa]	gi|685256341|ref|XM_009138521.1|	877	0	PREDICTED: Brassica rapa cytochrome P450 81F1 (LOC103860817), mRNA	Q0WTF4	538
BraA01g001570.3C	15.2912	15.9587	19.4236	10.0341	13.1356	10.8598	42.6908	48.0824	33.3962	47.9944	59.007	51.7532	36.5894	29.5253	28.0872	29.6374	27.3077	46.6018	29.2935	21.6937	25.3754	26.093	16.3408	16.6444	35.3435	61.8958	81.5319	68.3047	74.969	83.9259	62.3346	70.4265	58.5911	227.654	233.987	143.997	BraA01g001570.3C	protein_coding	chrA01:791570-791827:+	gi|685256354|ref|XP_009137358.1|	270	5e-29	PREDICTED: uncharacterized protein LOC103861371 [Brassica rapa]	gi|923905936|ref|XM_013867550.1|	258	8e-132	PREDICTED: Brassica napus uncharacterized LOC106426819 (LOC106426819), mRNA	F4JRC5	63.9
BraA01g001620.3C	2.182	4.49857	2.22723	2.01351	3.01243	3.88227	2.35273	2.65309	1.23246	1.52648	1.59698	2.2155	1.64533	2.42423	1.53365	0.219253	0.318435	0.407137	5.21631	11.1347	14.3436	5.984	4.93988	4.88236	7.77119	14.8667	15.6354	2.61076	2.81732	3.83407	4.65432	6.01548	5.57326	10.3677	10.5632	10.3249	BraA01g001620.3C	protein_coding	chrA01:822110-823905:-	gi|685256364|ref|XP_009137836.1|	1949	0	PREDICTED: cysteine proteinase COT44 [Brassica rapa]	gi|685256363|ref|XM_009139588.1|	1125	0	PREDICTED: Brassica rapa cysteine proteinase COT44 (LOC103861845), mRNA	P25251	642
BraA01g001690.3C	0.493913	1.1276	0.672203	1.29136	0.842332	0.928526	2.08443	2.36466	1.85985	0.763805	1.24301	1.00299	0.69521	0.794734	1.13404	0.694815	0.784876	1.1827	1.16883	0.66735	0.865814	0.877935	0.989656	0.656399	0	0.975971	0.766217	1.37892	1.22094	0.891015	0.0877952	0.0870463	0.322589	0.938725	0.446333	0.519363	BraA01g001690.3C	protein_coding	chrA01:869261-870972:+	gi|685256374|ref|XP_009138272.1|	1521	0	PREDICTED: transcription factor SPATULA [Brassica rapa]	gi|685256373|ref|XM_009140024.1|	1065	0	PREDICTED: Brassica rapa transcription factor SPATULA (LOC103862298), mRNA	Q9FUA4	396
BraA01g001700.3C	9.30203	30.9283	10.8393	4.70968	5.70914	5.64853	23.4098	21.895	25.6659	104.047	92.2493	101.553	14.1649	14.3052	15.3095	6.48494	8.63363	4.73082	22.6252	15.1822	15.4981	5.09202	5.93794	4.31348	10.2392	10.9131	9.45001	47.4511	43.1145	49.0058	12.3791	14.7979	13.8713	42.6338	39.9914	37.221	BraA01g001700.3C	protein_coding	chrA01:873081-874145:-	gi|685256376|ref|XP_009138381.1|	1661	0	PREDICTED: mitogen-activated protein kinase kinase kinase NPK1 [Brassica rapa]	gi|923906011|ref|XM_013867580.1|	1065	0	PREDICTED: Brassica napus mitogen-activated protein kinase kinase kinase NPK1-like (LOC106426850), mRNA	O80888	160
BraA01g001740.3C	1029.12	1421.36	1031.34	1106.57	1133.37	1108.71	1888.61	2015.71	1928.4	401.425	427.871	400.415	1108.77	1136.17	1091.12	645.583	649.908	1073.26	619.509	1008.1	1065.49	1239.93	1576.8	1573.27	1186.49	1322.45	1302.12	208.689	202.653	199.485	751.925	801.284	790.361	2231.33	2287.95	2095.78	BraA01g001740.3C	protein_coding	chrA01:888802-889805:+	gi|685256385|ref|XP_009138768.1|	1058	4e-142	PREDICTED: heat stress transcription factor B-1 [Brassica rapa]	gi|685256384|ref|XM_009140520.1|	861	0	PREDICTED: Brassica rapa heat stress transcription factor B-1 (LOC103862791), mRNA	Q96320	343
BraA01g001790.3C	1.78626	1.11854	1.31277	0.263733	0.568649	0.268644	2.01798	2.12847	1.29143	4.41974	3.54495	4.06265	0.905132	1.22632	1.05462	0.201026	0.486606	0.186646	4.56528	4.3443	3.7575	0.914426	1.32753	1.46503	3.67751	3.00341	2.9558	3.52018	4.04026	3.86688	3.35296	3.77768	4.40996	1.29008	2.09198	0.901584	BraA01g001790.3C	protein_coding	chrA01:906281-908731:-	gi|685256397|ref|XP_009139351.1|	1957	0	PREDICTED: patatin-like protein 1 isoform X1 [Brassica rapa]	gi|685256396|ref|XM_009141103.1|	1227	0	PREDICTED: Brassica rapa patatin-like protein 1 (LOC103863326), transcript variant X1, mRNA	O23179	662
BraA01g001860.3C	5.09707	1.99483	3.93096	16.0964	12.3629	12.6698	6.72903	6.38689	8.31705	8.29101	7.08572	7.36046	21.7624	20.048	23.8519	26.7692	22.0621	23.5228	4.48018	3.0991	2.8592	0.966409	2.72347	2.83858	1.0931	1.22082	0.937148	1.33931	1.46998	2.0062	1.69125	2.39546	1.77549	3.22914	4.54464	7.38448	BraA01g001860.3C	protein_coding	chrA01:934012-935169:-	gi|685256421|ref|XP_009140147.1|	1375	0	PREDICTED: methylesterase 9-like [Brassica rapa]	gi|685256420|ref|XM_009141899.1|	774	0	PREDICTED: Brassica rapa methylesterase 9-like (LOC103864108), mRNA	O23171	409
BraA01g002100.3C	2.65665	5.88269	4.13896	3.09665	2.38459	2.23431	3.54054	5.35537	6.31814	2.01814	2.11134	2.55547	1.18086	1.04993	0.412765	1.77028	2.28542	1.46102	2.83618	2.26707	3.08834	4.62281	7.48807	5.73395	1.34937	1.95916	2.45833	3.16884	3.62923	3.16448	2.08776	1.9221	1.7808	5.44782	3.94225	6.1752	BraA01g002100.3C	protein_coding	chrA01:1039989-1041393:-	gi|685256471|ref|XP_009142559.1|	1051	1e-143	PREDICTED: HVA22-like protein k [Brassica rapa]	gi|685256470|ref|XM_009144311.1|	627	0	PREDICTED: Brassica rapa HVA22-like protein k (LOC103866366), mRNA	Q6NLY8	307
BraA01g002190.3C	34.7719	21.4444	32.7553	49.8372	47.63	54.7639	132.035	105.473	106.35	77.2265	67.4273	64.1325	57.8924	62.5965	65.793	7.80568	6.1722	10.8709	35.078	33.0811	33.0708	50.6952	46.1901	44.3499	55.2337	64.0909	65.1325	34.8093	40.7202	38.7653	79.3977	78.2315	81.178	28.1221	24.3689	30.4373	BraA01g002190.3C	protein_coding	chrA01:1080982-1083531:+	gi|685256486|ref|XP_009143412.1|	1663	0	PREDICTED: monoacylglycerol lipase ABHD6-like [Brassica rapa]	gi|923520115|ref|XM_013809937.1|	948	0	PREDICTED: Brassica napus monoacylglycerol lipase ABHD6-like (LOC106369830), mRNA	Q1LZ86	75.1
BraA01g002210.3C	3.06844	3.04988	3.13205	5.30345	4.54079	5.12753	7.82664	7.15091	5.66711	4.06726	5.67347	5.04421	7.71248	7.21	7.189	10.8941	13.4672	7.31575	2.37105	2.22102	2.30523	2.64917	4.25852	4.27206	4.38696	4.72459	4.48308	3.64738	4.87613	4.12162	1.50642	1.95709	1.95637	8.14605	7.07735	6.04337	BraA01g002210.3C	protein_coding	chrA01:1085920-1088516:-	gi|685256488|ref|XP_009143525.1|	2694	0	PREDICTED: ATPase family AAA domain-containing protein 3C [Brassica rapa]	gi|685256487|ref|XM_009145277.1|	1800	0	PREDICTED: Brassica rapa ATPase family AAA domain-containing protein 3C (LOC103867193), mRNA	Q6NVR9	295
BraA01g002220.3C	10.2281	9.29259	19.7617	16.18	12.8748	13.7344	29.172	33.0341	29.2984	75.3197	89.8299	82.3394	23.9087	26.6457	23.0048	4.62487	4.478	14.7905	2.22286	3.33153	4.61046	6.62292	3.59313	4.57721	6.65878	16.1423	11.3336	34.1942	41.9889	35.9444	50.6469	45.9659	48.3127	5.55412	9.50689	9.60281	BraA01g002220.3C	protein_coding	chrA01:1091999-1092238:-	gi|685256492|ref|XP_009143738.1|	419	1e-51	PREDICTED: protein RADIALIS-like 3 [Brassica rapa]	gi|685256491|ref|XM_009145490.1|	240	7e-122	PREDICTED: Brassica rapa protein RADIALIS-like 3 (LOC103867386), mRNA	Q6NNN0	139
BraA01g002230.3C	5.38752	32.5061	5.54087	3.23902	2.83065	3.37607	11.408	9.03199	8.4375	22.0068	22.2308	23.8286	4.86877	4.55332	3.13263	15.2727	15.3992	6.55698	13.4531	10.0091	9.95927	6.00699	6.28964	8.46167	8.35904	13.0212	10.2573	35.9537	37.2293	37.9926	9.70713	9.88328	9.79649	25.8313	20.8461	18.7979	BraA01g002230.3C	protein_coding	chrA01:1098893-1101288:+	gi|685256494|ref|XP_009143836.1|	3398	0	PREDICTED: U-box domain-containing protein 5-like [Brassica rapa]	gi|685256493|ref|XM_009145588.1|	2148	0	PREDICTED: Brassica rapa U-box domain-containing protein 5-like (LOC103867481), mRNA	O23225	876
BraA01g002240.3C	0.156274	0.840958	0.159514	1.36997	0.977215	1.32203	1.29366	0.581915	0.441341	0.402779	0.252828	0.476019	0.577405	0.251453	0.307551	3.07775	4.57644	2.24524	9.50956	5.22594	4.60224	17.25	20.5809	17.9795	3.35138	3.78978	2.90917	7.0063	7.53294	5.84336	6.50013	7.10568	6.88951	6.53426	3.64346	4.51897	BraA01g002240.3C	protein_coding	chrA01:1103618-1105091:+	gi|685256496|ref|XP_009143937.1|	1846	0	PREDICTED: pheophytinase, chloroplastic [Brassica rapa]	gi|685256495|ref|XM_009145689.1|	1122	0	PREDICTED: Brassica rapa pheophytinase, chloroplastic (LOC103867579), mRNA	Q9FFZ1	104
BraA01g002270.3C	200.12	306.055	179.213	74.6438	66.4506	75.3747	353.366	172.865	121.485	188.962	134.398	191.799	102.669	127.648	116.404	63.1448	66.8714	72.0633	334.792	386.162	387.77	233.875	181.924	196.537	326.641	389.81	377.667	562.311	543.743	551.415	344.835	339.669	324.547	451.217	324.502	344.902	BraA01g002270.3C	protein_coding	chrA01:1118529-1118903:+	gi|685256502|ref|XP_009144195.1|	573	1e-73	PREDICTED: uncharacterized protein LOC103867852 [Brassica rapa]	gi|685256501|ref|XM_009145947.1|	375	0	PREDICTED: Brassica rapa uncharacterized LOC103867852 (LOC103867852), mRNA	.	.
BraA01g002280.3C	1.81168	5.85724	2.09044	2.83477	1.88068	2.59141	8.8987	6.70424	7.91939	4.62881	4.16292	4.23883	3.7419	3.97129	5.11562	18.8374	13.9476	6.1729	6.55074	4.70945	2.81681	6.80459	7.92016	10.1392	4.8988	3.39593	3.82879	9.23617	10.3685	11.4712	6.88873	6.08034	7.94842	6.51225	6.5771	7.95143	BraA01g002280.3C	protein_coding	chrA01:1119461-1120896:-	gi|685256504|ref|XP_009144304.1|	1974	0	PREDICTED: salicylate carboxymethyltransferase [Brassica rapa]	gi|685256503|ref|XM_009146056.1|	1113	0	PREDICTED: Brassica rapa salicylate carboxymethyltransferase (LOC103867926), mRNA	Q9SPV4	289
BraA01g002290.3C	6.50079	6.12274	7.87585	7.40042	8.28906	8.16643	11.183	6.98091	8.16728	5.51196	4.71806	4.25646	7.76058	5.99585	7.65232	20.2558	17.2127	15.0772	1.66368	1.16977	1.21412	1.16632	1.92563	2.00702	0.716611	0.45838	0.628337	2.81366	1.80222	1.85326	1.55512	1.09215	1.42851	2.54035	1.84472	1.7888	BraA01g002290.3C	protein_coding	chrA01:1124025-1126574:+	gi|685256506|ref|XP_009144397.1|	2315	0	PREDICTED: long chain base biosynthesis protein 1 [Brassica rapa]	gi|685256505|ref|XM_009146149.1|	1440	0	PREDICTED: Brassica rapa long chain base biosynthesis protein 1 (LOC103868026), mRNA	Q94IB8	816
BraA01g002300.3C	1.08884	0.61859	0.645339	2.26883	2.39606	1.4857	5.5758	1.49475	1.86488	2.06405	2.99281	3.03138	1.66857	1.65782	1.9355	0.592931	1.00468	1.51392	1.2468	1.31695	0.997455	1.46094	1.22842	1.28034	1.12988	1.40072	1.88894	1.41899	1.88846	1.62441	2.17272	2.00562	1.96141	17.9241	6.20843	7.79305	BraA01g002300.3C	protein_coding	chrA01:1127273-1132597:+	gi|674958184|emb|CDX75576.1|	4099	0	BnaA01g01260D [Brassica napus]	gi|685256507|ref|XM_009146257.1|	1566	0	PREDICTED: Brassica rapa phosphatidylinositol/phosphatidylcholine transfer protein SFH12 (LOC103868119), mRNA	Q94A34	961
BraA01g002350.3C	4.61752	4.33221	3.6802	7.12108	6.04097	6.30239	6.83791	7.73908	6.93115	7.23852	7.23169	6.61515	15.2246	11.5349	13.1331	4.00421	4.04937	3.46992	2.18116	2.30756	2.39504	1.95635	2.28135	3.24241	2.3739	3.47697	2.28962	1.49585	1.05544	1.0581	1.34923	1.87281	2.10695	5.0492	4.66428	3.65821	BraA01g002350.3C	protein_coding	chrA01:1149882-1153793:+	gi|685256520|ref|XP_009144986.1|	2456	0	PREDICTED: 3-epi-6-deoxocathasterone 23-monooxygenase [Brassica rapa]	gi|685256519|ref|XM_009146738.1|	1386	0	PREDICTED: Brassica rapa 3-epi-6-deoxocathasterone 23-monooxygenase (LOC103868633), mRNA	Q9M066	850
BraA01g002360.3C	10.7072	12.2111	10.6159	65.041	63.5817	59.2328	42.2424	38.2741	37.9429	55.0528	55.1679	57.9241	74.551	71.9501	75.5977	71.4267	77.6581	83.3752	28.981	25.9163	27.4727	54.769	56.4614	58.7312	63.4022	83.6129	78.5023	29.3999	29.8081	27.5811	50.6605	53.3293	54.754	183.053	143.251	103.446	BraA01g002360.3C	protein_coding	chrA01:1164127-1168172:+	gi|685256522|ref|XP_009145073.1|	4414	0	PREDICTED: beta-galactosidase 3 [Brassica rapa]	gi|685256521|ref|XM_009146825.1|	2523	0	PREDICTED: Brassica rapa beta-galactosidase 3 (LOC103868724), mRNA	Q9SCV9	1631
BraA01g002420.3C	413.163	183.794	412.969	217.39	213.127	214.953	359.717	388.845	380.433	275.083	282.161	276.444	345.034	354.754	348.715	48.1325	50.7296	116.192	91.2467	110.724	116.397	88.834	68.3529	72.2002	151.204	175.744	169.33	133.751	129.469	133.512	151.649	155.16	143.204	42.642	41.969	40.4608	BraA01g002420.3C	protein_coding	chrA01:1201085-1203054:+	gi|10197652|gb|AAG14962.1|AF214008_1	2522	0	cytochrome p450-dependent monooxygenase [Brassica napus]	gi|937574917|ref|NM_001316183.1|	1536	0	Brassica napus cytochrome P450 84A1 (LOC106350027), mRNA	Q42600	936
BraA01g002580.3C	38.5541	30.5991	36.7368	76.1691	69.7149	69.106	79.29	54.7636	61.2754	66.1756	66.2457	61.2177	88.7612	89.5338	95.7524	98.6638	105.866	73.3918	62.292	41.0435	40.5505	60.0369	76.2051	69.6144	138.206	121.347	121.846	85.1729	86.3066	82.1297	94.2674	94.9813	107.688	109.816	106.744	123.671	BraA01g002580.3C	protein_coding	chrA01:1296579-1297433:+	gi|685256582|ref|XP_009147904.1|	818	9e-106	PREDICTED: cold shock domain-containing protein 3-like [Brassica rapa]	gi|685256581|ref|XM_009149656.1|	855	0	PREDICTED: Brassica rapa cold shock domain-containing protein 3-like (LOC103871381), mRNA	O65639	187
BraA01g002610.3C	9.67098	20.7759	11.0518	14.7444	15.059	16.0071	18.0182	15.7691	15.7936	19.5073	17.0068	17.9312	10.9861	11.0507	9.82668	15.9708	17.0386	18.5354	6.2901	6.49796	5.85981	10.8747	10.5697	11.9744	9.35555	8.38416	9.567	13.7761	11.9857	11.2746	6.50253	9.33713	8.7537	4.49524	2.7358	5.19519	BraA01g002610.3C	protein_coding	chrA01:1304217-1305607:-	gi|685256590|ref|XP_009148286.1|	1352	0	PREDICTED: LOW QUALITY PROTEIN: L-ascorbate peroxidase 5, peroxisomal [Brassica rapa]	gi|685256589|ref|XM_009150038.1|	816	0	PREDICTED: Brassica rapa L-ascorbate peroxidase 5, peroxisomal (LOC103871729), mRNA	Q7XZP5	466
BraA01g002630.3C	6.34088	18.0727	6.75374	5.17286	5.11963	5.96023	16.1992	8.506	9.13548	8.43202	8.82143	8.30438	3.78348	4.83033	3.70753	6.20527	5.88304	4.92117	46.694	53.826	50.8407	30.6766	42.2839	43.8616	18.6239	31.3982	37.6362	92.905	96.2619	90.0644	17.2498	19.6292	17.646	52.6594	48.531	44.5474	BraA01g002630.3C	protein_coding	chrA01:1308486-1309816:-	gi|685256596|ref|XP_009148617.1|	1179	2e-159	PREDICTED: histone-lysine N-methyltransferase, H3 lysine-79 specific-like [Brassica rapa]	gi|685256595|ref|XM_009150369.1|	954	0	PREDICTED: Brassica rapa histone-lysine N-methyltransferase, H3 lysine-79 specific-like (LOC103871997), mRNA	.	.
BraA01g002750.3C	1.2053	0.631023	1.41375	0.819538	0.80539	0.894429	0.566327	0.629917	0.513578	1.83122	2.04123	2.12555	1.13846	1.19086	1.33168	1.17499	1.22409	1.31189	0.99723	1.07141	1.07866	0.969731	0.866649	0.963496	1.49648	1.68654	1.64018	0.906358	1.0683	1.13399	1.21782	1.14036	1.19118	2.59219	2.08666	1.84552	BraA01g002750.3C	protein_coding	chrA01:1371272-1382615:+	gi|685256632|ref|XP_009150077.1|	8142	0	PREDICTED: DNA-directed RNA polymerase II subunit 1-like [Brassica rapa]	gi|685256631|ref|XM_009151829.1|	5181	0	PREDICTED: Brassica rapa DNA-directed RNA polymerase II subunit 1-like (LOC103873389), mRNA	P18616	2982
BraA01g002770.3C	453.997	1780.4	452.651	641.012	646.351	631.334	201.867	180.259	165.422	5.26826	4.13367	4.21567	51.9223	45.5657	48.0838	8.0872	14.1382	35.4576	347.074	904.915	838.616	456.601	423.758	418.02	245.204	285.196	271.016	6.60871	6.66138	6.75675	135.399	139.985	119.682	56.907	64.4183	47.5208	BraA01g002770.3C	protein_coding	chrA01:1388601-1389464:-	gi|685256640|ref|XP_009150416.1|	964	3e-131	PREDICTED: senescence-associated protein DIN1 isoform X1 [Brassica rapa]	gi|685256639|ref|XM_009152168.1|	549	0	PREDICTED: Brassica rapa senescence-associated protein DIN1 (LOC103873743), transcript variant X1, mRNA	.	.
BraA01g002830.3C	0.103997	0	0	0.383868	0.472958	0.48877	0.810263	0	0.352444	0	0.112168	0.211187	0	0	0	0	0	0	1.05474	3.8993	2.62517	2.32918	0.340985	0.473862	2.00725	1.00881	0.860442	0.102474	0.0964043	0.409331	2.32923	1.86948	1.63016	0.88945	0.563873	0.328067	BraA01g002830.3C	protein_coding	chrA01:1403232-1404074:-	gi|685256654|ref|XP_009151156.1|	1203	3e-164	PREDICTED: uncharacterized protein LOC103874453 [Brassica rapa]	gi|685256653|ref|XM_009152908.1|	843	0	PREDICTED: Brassica rapa uncharacterized LOC103874453 (LOC103874453), mRNA	.	.
BraA01g002970.3C	62.7892	88.3449	59.7504	54.8518	63.879	58.0844	37.7124	39.5615	35.6696	70.8891	56.1101	61.6403	80.8975	80.068	87.6924	76.4924	86.3867	76.5746	77.4445	81.7813	79.0772	61.8509	55.6706	53.1796	55.9769	72.746	69.5223	185.786	206.317	201.199	82.5017	78.7365	80.3051	158.284	176.01	139.66	BraA01g002970.3C	protein_coding	chrA01:1460458-1462140:-	gi|685256688|ref|XP_009101799.1|	1467	0	PREDICTED: ankyrin repeat domain-containing protein 2 [Brassica rapa]	gi|685256689|ref|XM_009103627.1|	637	0	PREDICTED: Brassica rapa ankyrin repeat domain-containing protein 2 (LOC103827950), transcript variant X2, mRNA	Q9SAR5	513
BraA01g002980.3C	1.11043	1.96094	0.995222	1.14965	1.41646	1.3238	0.553911	0.691549	0.642501	0.335064	0.233692	0.384991	0.428868	0.464843	0.373108	0.1905	0.11067	0.318371	0.329618	0.686136	0.541234	0.462157	0.976815	1.11065	0.203288	0.233529	0.168061	0.640484	0.778293	0.719554	0.346624	0.458223	0.344937	0.411798	0.352433	0.455666	BraA01g002980.3C	protein_coding	chrA01:1462682-1468250:+	gi|685256692|ref|XP_009101983.1|	3073	0	PREDICTED: chloride channel protein CLC-e isoform X1 [Brassica rapa]	gi|685256691|ref|XM_009103735.1|	2099	0	PREDICTED: Brassica rapa chloride channel protein CLC-e (LOC103828107), transcript variant X1, mRNA	Q8GX93	1002
BraA01g003110.3C	0.0707583	0.0692314	0	0	0	0.0665107	0.206735	0.0752806	0	0.218847	0	0	0.373486	0	0.0696271	0.0995397	0.0963787	0.646934	0.502341	0.57363	1.04191	0.452785	0.541337	0.483614	0.455236	0.381323	0.512255	0.697218	0.0655923	0.835511	0.452794	0.598575	0.207964	2.2862	1.68807	1.48809	BraA01g003110.3C	protein_coding	chrA01:1519026-1520887:+	gi|923507437|ref|XP_013731104.1|	1716	0	PREDICTED: ubiquitin domain-containing protein DSK2b-like isoform X3 [Brassica napus]	gi|923507436|ref|XM_013875650.1|	1091	0	PREDICTED: Brassica napus ubiquitin domain-containing protein DSK2b-like (LOC106434636), transcript variant X3, mRNA	Q9SII8	487
BraA01g003220.3C	0.124354	1.21671	1.52318	0.229504	0	0	1.08998	0	0.421433	1.15383	1.073	0.378789	0	0	0.367098	0	0	0	0.630598	0	0.392379	0.265248	0.951371	0.849926	0.400027	0	0	0	0.576375	0.367091	1.45889	1.31496	1.34012	0.118173	0	0.130762	BraA01g003220.3C	protein_coding	chrA01:1592109-1593394:-	gi|685256759|ref|XP_009105030.1|	1252	3e-173	PREDICTED: cytokinin riboside 5'-monophosphate phosphoribohydrolase LOG5-like [Brassica rapa]	gi|685256758|ref|XM_009106782.1|	705	0	PREDICTED: Brassica rapa cytokinin riboside 5'-monophosphate phosphoribohydrolase LOG5-like (LOC103830928), mRNA	Q8LBB7	400
BraA01g003230.3C	0.911326	2.85331	0.80619	0.672766	0.828906	0.513971	1.30173	1.09885	1.09812	3.38234	3.47302	3.94802	2.2448	0.912411	2.212	0.598273	0	0.555476	4.19	2.70894	3.64236	2.9806	2.72244	1.45336	1.56351	1.37514	1.63368	3.59191	3.2102	3.04892	2.52708	2.31279	2.14277	11.2584	11.6613	18.9101	BraA01g003230.3C	protein_coding	chrA01:1599469-1601350:+	gi|923511563|ref|XP_013746828.1|	2263	0	PREDICTED: lysine histidine transporter-like 7 [Brassica napus]	gi|685256760|ref|XM_009106895.1|	1443	0	PREDICTED: Brassica rapa lysine histidine transporter-like 7 (LOC103831015), mRNA	Q84WE9	702
BraA01g003270.3C	40.4151	78.8831	44.2147	83.8645	87.7761	87.4719	38.0483	30.5396	28.798	72.4351	79.5805	78.3884	53.9327	53.0245	57.308	127.266	127.318	60.9082	148.716	78.0246	80.9827	77.5852	63.1982	67.5219	61.2263	41.6613	43.0839	90.1634	94.9097	90.3453	91.5125	89.8553	93.5036	36.0427	29.8917	45.2217	BraA01g003270.3C	protein_coding	chrA01:1620130-1621403:-	gi|685256779|ref|XP_009105909.1|	1470	0	PREDICTED: aquaporin PIP2-7 [Brassica rapa]	gi|685256778|ref|XM_009107661.1|	846	0	PREDICTED: Brassica rapa aquaporin PIP2-7 (LOC103831723), mRNA	P93004	551
BraA01g003280.3C	0.471342	0.0576463	0.240557	0.0543683	0	0.0553808	0	0	0.066557	0	0	0	0	0.126403	0	0	0	0	27.2479	28.8375	25.2212	12.3787	9.40137	10.537	20.3428	13.7165	14.2584	5.92158	6.49932	6.6671	8.16885	6.91544	6.75339	2.79946	3.83342	3.71722	BraA01g003280.3C	protein_coding	chrA01:1631727-1633925:+	gi|685256782|ref|XP_009106100.1|	2624	0	PREDICTED: catalase-2 [Brassica rapa]	gi|685256781|ref|XM_009107852.1|	1460	0	PREDICTED: Brassica rapa catalase-2 (LOC103831878), mRNA	P25819	994
BraA01g003300.3C	5.79198	9.27327	5.91206	9.8392	9.42881	11.631	8.07663	7.4226	8.03002	29.0422	31.8032	32.4786	22.79	28.3825	26.4244	44.6283	43.749	49.3448	27.1015	47.2217	51.3658	48.2943	37.262	37.4874	42.7686	65.1227	68.6144	51.7534	49.0542	54.9204	33.8348	42.1763	39.9785	131.723	117.195	87.896	BraA01g003300.3C	protein_coding	chrA01:1640083-1640823:-	gi|685256786|ref|XP_009106315.1|	1097	4e-150	PREDICTED: probable BOI-related E3 ubiquitin-protein ligase 2 [Brassica rapa]	gi|685256785|ref|XM_009108067.1|	666	0	PREDICTED: Brassica rapa probable BOI-related E3 ubiquitin-protein ligase 2 (LOC103832075), mRNA	Q9LDD1	88.2
BraA01g003310.3C	4.3645	2.59933	3.6802	7.35455	6.68821	7.31315	3.69617	5.24911	6.2166	39.714	37.25	40.2689	20.6334	24.0198	23.3409	24.2922	18.8683	24.0416	7.12085	7.30726	7.98348	5.26191	3.31833	4.53938	8.95298	9.40827	10.5977	16.2674	18.822	16.0583	19.429	18.4606	16.174	5.59019	5.3502	6.1857	BraA01g003310.3C	protein_coding	chrA01:1650550-1651090:+	gi|685256788|ref|XP_009106425.1|	800	4e-107	PREDICTED: heavy metal-associated isoprenylated plant protein 26 [Brassica rapa]	gi|923735749|ref|XM_013814271.1|	462	0	PREDICTED: Brassica napus heavy metal-associated isoprenylated plant protein 26-like (LOC106374189), mRNA	O49613	301
BraA01g003320.3C	48.6213	15.159	46.5436	53.236	55.9961	55.293	52.6274	42.482	47.384	23.8945	19.8354	25.1955	86.566	90.2602	91.9696	67.8668	66.3979	69.7573	20.4401	22.3379	23.0523	44.7349	47.7707	51.368	32.9562	29.325	31.0046	20.3552	21.7184	21.1948	72.2759	71.9258	69.7233	30.6434	28.8212	25.6958	BraA01g003320.3C	protein_coding	chrA01:1654144-1654839:-	gi|685256791|ref|XP_009106517.1|	1185	5e-163	PREDICTED: uncharacterized protein LOC103832273 [Brassica rapa]	gi|685256790|ref|XM_009108269.1|	690	0	PREDICTED: Brassica rapa uncharacterized LOC103832273 (LOC103832273), mRNA	Q8VY76	318
BraA01g003380.3C	52.6418	41.6159	54.346	44.4212	40.3938	43.7433	143.375	82.9445	80.4957	81.5104	88.7289	83.7315	54.9382	57.3279	50.8154	15.205	23.5827	27.9733	17.8641	12.17	14.6314	20.9201	16.2976	15.0484	29.9404	33.6546	34.4667	47.2358	46.2008	50.1252	22.6283	27.9383	23.5313	54.7804	37.8756	27.5719	BraA01g003380.3C	protein_coding	chrA01:1686531-1688167:+	gi|685256811|ref|XP_009107363.1|	1338	0	PREDICTED: transcription factor MYB32-like [Brassica rapa]	gi|685256810|ref|XM_009109115.1|	857	0	PREDICTED: Brassica rapa transcription factor MYB32-like (LOC103832978), mRNA	O49608	396
BraA01g003420.3C	0	0.0849705	0	0	0	0.0408156	0	0	0	0	0	0.0440889	0	0	0.0854561	0	0	0	0.176155	0.264015	0.0913414	0.0926202	0	0.0494633	0.139683	0.0468013	0.269447	0.0427862	0.120756	0	0.046311	0.183664	0	0.412639	0.376697	0.684896	BraA01g003420.3C	protein_coding	chrA01:1703967-1705985:-	gi|685256820|ref|XP_009107761.1|	3364	0	PREDICTED: uncharacterized protein LOC103833399 [Brassica rapa]	gi|685256819|ref|XM_009109513.1|	2019	0	PREDICTED: Brassica rapa uncharacterized LOC103833399 (LOC103833399), mRNA	.	.
BraA01g003450.3C	0.481701	0.0785511	0.737531	0.296337	0	0.075464	0.547317	0.341658	0.453466	2.31753	1.73183	1.63032	0.593268	0.172241	0.553	0.112939	0.109353	0	0.895657	1.13899	1.35105	0.856228	0.61421	0.182905	2.23825	1.21143	1.57758	2.68965	3.86995	2.36996	2.14061	3.05619	2.04498	1.29698	1.04471	1.18188	BraA01g003450.3C	protein_coding	chrA01:1718294-1719965:-	gi|685256824|ref|XP_009107945.1|	1834	0	PREDICTED: putative amidase C869.01 [Brassica rapa]	gi|685256823|ref|XM_009109697.1|	1087	0	PREDICTED: Brassica rapa putative amidase C869.01 (LOC103833589), mRNA	A0A1P8B760	583
BraA01g003460.3C	125.728	271.796	125.906	462.353	486.21	484.059	343.015	388.094	390.965	700.823	715.963	701.946	538.439	558.794	554.89	577.451	582.255	496.864	715.45	488.969	470.874	591.624	588.084	550.62	390.6	340.976	324.722	695.101	645.426	702.503	446.308	469.989	492.032	216.514	212.8	256.73	BraA01g003460.3C	protein_coding	chrA01:1721093-1721608:-	gi|685256828|ref|XP_009108112.1|	687	2e-89	PREDICTED: peptidyl-prolyl cis-trans isomerase [Brassica rapa]	gi|685256827|ref|XM_009109864.1|	516	0	PREDICTED: Brassica rapa peptidyl-prolyl cis-trans isomerase (LOC103833770), mRNA	Q42406	258
BraA01g003510.3C	0.314228	0.307447	0.962227	2.31972	2.14357	2.06755	1.22411	1.33724	0.354971	3.23956	2.0335	1.91431	4.64407	5.73025	7.4209	23.8703	24.8243	7.79799	2.54952	0.955279	2.31349	4.69176	4.80801	6.08505	5.0541	5.41888	3.24979	1.54812	1.74772	1.85519	15.7512	11.6296	13.8531	14.9304	12.9485	15.8601	BraA01g003510.3C	protein_coding	chrA01:1737717-1737995:-	gi|685256844|ref|XP_009108765.1|	480	2e-60	PREDICTED: auxin-induced protein 15A [Brassica rapa]	gi|685256843|ref|XM_009110517.1|	279	2e-143	PREDICTED: Brassica rapa auxin-induced protein 15A (LOC103834414), mRNA	P33079	98.6
BraA01g003530.3C	0	0	0	0	0	0	0	0	0	0	0	0	0.587618	1.79131	0.821599	1.95762	1.51636	0.363515	0	0	0	1.1873	0	0	0	0.299974	0	0	0	0	6.82712	4.70879	6.81661	1.05793	1.50903	0.585314	BraA01g003530.3C	protein_coding	chrA01:1744623-1744937:-	gi|685256848|ref|XP_009108953.1|	551	5e-71	PREDICTED: auxin-induced protein 15A [Brassica rapa]	gi|923923830|ref|XM_013875577.1|	315	2e-163	PREDICTED: Brassica napus auxin-induced protein 15A-like (LOC106434720), mRNA	P33081	108
BraA01g003540.3C	0	0	0	2.9963	4.92227	2.03473	3.4258	4.0303	5.80772	4.74235	2.33476	7.14322	3.42777	3.77335	4.5264	11.8001	10.6882	9.54228	4.93969	2.1936	1.70758	5.77161	10.942	12.3292	3.48172	3.79134	2.23874	3.19946	6.27075	6.12385	13.275	10.8727	12.9894	5.91411	5.28161	6.82866	BraA01g003540.3C	protein_coding	chrA01:1756341-1756664:+	gi|685256850|ref|XP_009109058.1|	570	9e-74	PREDICTED: auxin-induced protein 15A [Brassica rapa]	gi|923923823|ref|XM_013875574.1|	324	2e-168	PREDICTED: Brassica napus auxin-induced protein 15A-like (LOC106434717), mRNA	O65695	219
BraA01g003550.3C	0	0.595679	0.621438	1.68542	1.38439	1.90756	1.58114	1.72727	1.37551	0.627664	2.84549	1.03027	3.85624	3.70079	3.19511	14.5598	11.6096	5.83139	6.79207	3.2904	5.12273	8.00811	20.1836	18.2626	8.48668	6.12447	6.50634	5.59905	5.0793	6.78949	14.9343	18.455	14.7125	15.8138	14.3044	19.6324	BraA01g003550.3C	protein_coding	chrA01:1762290-1762721:-	gi|685256852|ref|XP_009109163.1|	753	2e-100	PREDICTED: uncharacterized protein LOC103834796 [Brassica rapa]	gi|923923828|ref|XM_013875576.1|	432	0	PREDICTED: Brassica napus auxin-responsive protein SAUR72-like (LOC106434719), mRNA	O65695	76.6
BraA01g003600.3C	2.78731	0.553955	1.91155	0.602832	1.2379	0.90062	2.88422	1.7144	1.62356	4.5349	5.12012	4.73158	2.57466	1.82201	1.67136	0.612666	0.355926	0.398187	1.81097	1.54468	1.69485	1.06831	0.666385	0.595329	4.01617	4.50631	3.69342	6.35123	6.01543	6.68533	4.50556	3.96054	2.77337	0.703577	1.039	0.915916	BraA01g003600.3C	protein_coding	chrA01:1774213-1780439:+	gi|674958065|emb|CDX75457.1|	3215	0	BnaA01g02450D [Brassica napus]	gi|923923812|ref|XM_013875568.1|	1858	0	PREDICTED: Brassica napus arginine decarboxylase 2-like (LOC106434712), mRNA	O23141	1041
BraA01g003700.3C	6.78732	19.7381	5.19602	23.6611	22.5075	22.684	29.3786	34.0997	32.5863	35.7647	33.9595	32.3519	32.8402	29.1232	37.29	120.943	121.468	80.032	15.6795	8.40645	8.32857	19.3032	25.7572	30.7116	15.7688	10.3636	10.1393	11.8896	11.3602	12.2443	10.6572	12.5599	11.4519	145.841	40.8899	37.866	BraA01g003700.3C	protein_coding	chrA01:1817021-1817485:-	gi|685256889|ref|XP_009111076.1|	615	4e-79	PREDICTED: ocs element-binding factor 1-like [Brassica rapa]	gi|685256888|ref|XM_009112828.1|	465	0	PREDICTED: Brassica rapa ocs element-binding factor 1-like (LOC103836519), mRNA	O65683	193
BraA01g003710.3C	6.60745	0.630719	6.8541	2.13156	2.01551	2.52471	0.36622	0.97159	0.728212	7.25506	7.30042	6.38163	2.66534	2.13211	2.85445	0.528988	0.878038	0.771802	10.1881	10.1797	9.04011	4.06771	3.69881	2.99844	8.81309	7.00582	7.16686	11.5921	12.1505	11.0476	4.69801	5.96443	5.52596	2.96084	2.44663	1.97705	BraA01g003710.3C	protein_coding	chrA01:1822311-1825552:-	gi|923520302|ref|XP_013666011.1|	2603	0	PREDICTED: phosphatidylinositol/phosphatidylcholine transfer protein SFH1 isoform X2 [Brassica napus]	gi|923520301|ref|XM_013810557.1|	1629	0	PREDICTED: Brassica napus phosphatidylinositol/phosphatidylcholine transfer protein SFH1 (LOC106370548), transcript variant X2, mRNA	F4JLE5	911
BraA01g003730.3C	1.66198	0	0.28274	1.15024	1.88959	1.30184	1.48372	1.1788	0.625825	0.142786	0.597521	0.140625	0.731041	1.33711	1.49913	1.169	1.13188	0.180896	1.40465	2.66663	2.47639	9.4534	18.0129	18.932	6.5344	4.47828	4.01064	0.409409	0.641934	0.136282	2.06797	2.48969	4.61332	3.42197	3.60451	4.22341	BraA01g003730.3C	protein_coding	chrA01:1835635-1836267:-	gi|685256901|ref|XP_009111625.1|	921	9e-124	PREDICTED: uncharacterized protein LOC103837022 [Brassica rapa]	gi|685256900|ref|XM_009113377.1|	633	0	PREDICTED: Brassica rapa uncharacterized LOC103837022 (LOC103837022), mRNA	.	.
BraA01g003860.3C	55.4745	96.1971	56.119	31.7659	30.9728	32.1246	85.6227	77.4638	78.0545	69.575	73.5894	71.4136	34.9022	38.7863	36.0668	41.2841	40.1417	22.6427	73.0906	60.7331	61.9937	36.053	43.5776	45.2784	41.4265	36.035	42.3891	95.6583	90.7961	83.8296	37.6385	33.7821	36.6364	97.6678	92.6519	85.6766	BraA01g003860.3C	protein_coding	chrA01:1893838-1896162:-	gi|674890347|emb|CDY42403.1|	637	4e-81	BnaA08g00110D [Brassica napus]	gi|685256931|ref|XR_627130.1|	366	0	PREDICTED: Brassica rapa uncharacterized LOC103838440 (LOC103838440), transcript variant X1, ncRNA	C6KIE6	119
BraA01g003880.3C	2.43527	0.476543	1.24288	0.280903	0.484536	0.400588	2.19383	1.94318	1.78817	4.70748	5.18754	5.00712	1.28541	1.50208	1.91707	0.513874	0.414629	0.556633	2.84032	3.94849	3.52188	2.53229	1.92964	2.1499	6.13652	6.75879	5.41496	11.1581	10.5537	10.963	5.45428	5.15024	5.60666	6.76909	6.80007	8.38645	BraA01g003880.3C	protein_coding	chrA01:1904494-1905933:-	gi|685256936|ref|XP_009113342.1|	2530	0	PREDICTED: guanine nucleotide-binding protein subunit beta-like protein [Brassica rapa]	gi|685256935|ref|XM_009115094.1|	1440	0	PREDICTED: Brassica rapa guanine nucleotide-binding protein subunit beta-like protein (LOC103838614), mRNA	O48716	452
BraA01g003910.3C	11.6767	12.2275	12.112	4.4265	5.59735	3.97498	45.3647	39.4848	42.2101	17.5041	20.8994	19.0336	29.7838	30.9416	29.936	4.43952	3.86868	10.7995	16.0033	10.8093	10.4889	6.39489	5.5186	6.47082	12.656	15.7146	14.9483	16.17	16.441	15.4025	31.8405	28.2318	28.8771	71.6758	77.0681	78.7803	BraA01g003910.3C	protein_coding	chrA01:1915218-1917484:+	gi|685256944|ref|XP_009113671.1|	2426	0	PREDICTED: 4-hydroxy-3-methylbut-2-enyl diphosphate reductase, chloroplastic [Brassica rapa]	gi|685256943|ref|XM_009115423.1|	1389	0	PREDICTED: Brassica rapa 4-hydroxy-3-methylbut-2-enyl diphosphate reductase, chloroplastic (LOC103838937), mRNA	Q94B35	867
BraA01g004030.3C	46.0388	26.516	41.5773	56.0425	53.0863	52.6359	88.6409	94.9228	97.377	36.8604	38.2105	31.0808	53.0826	58.1424	57.6726	13.0909	13.787	25.5882	12.5838	12.4907	12.8784	15.1481	13.3822	12.646	23.0202	26.5703	28.3657	4.98686	4.54016	5.54226	13.9295	13.2928	15.5944	7.98987	12.0385	11.0727	BraA01g004030.3C	protein_coding	chrA01:1959916-1961726:+	gi|685256980|ref|XP_009115174.1|	1588	0	PREDICTED: cinnamyl alcohol dehydrogenase 5 [Brassica rapa]	gi|685256979|ref|XM_009116926.1|	1074	0	PREDICTED: Brassica rapa cinnamyl alcohol dehydrogenase 5 (LOC103840386), mRNA	O49482	568
BraA01g004070.3C	55.2157	18.5828	52.2133	193.419	193.119	197.62	119.086	87.3878	86.9268	71.7114	69.6908	69.9301	229.592	226.104	227.88	261.671	267.23	177.163	37.482	55.4078	54.1619	113.338	107.426	113.249	182.029	223.172	219.205	35.4513	35.7565	36.3658	138.138	146.277	147.561	184.347	135.252	132.593	BraA01g004070.3C	protein_coding	chrA01:1976165-1978736:+	gi|923504758|ref|XP_013652586.1|	2836	0	PREDICTED: D-3-phosphoglycerate dehydrogenase 1, chloroplastic [Brassica napus]	gi|685256987|ref|XM_009117307.1|	1782	0	PREDICTED: Brassica rapa D-3-phosphoglycerate dehydrogenase 2, chloroplastic (LOC103840754), mRNA	O49485	1044
BraA01g004130.3C	2.89106	4.43414	2.87124	10.5271	9.68332	9.98869	5.63122	7.06611	5.73743	3.78612	2.61256	3.72881	9.89837	9.38759	8.6883	19.7855	17.6672	16.4311	3.32834	2.0587	2.05457	3.66667	4.3553	4.89541	3.51895	2.27387	2.98998	6.85231	8.40213	6.22779	1.4167	2.14823	2.52615	2.82161	3.64346	4.84762	BraA01g004130.3C	protein_coding	chrA01:2002141-2003508:-	gi|685257006|ref|XP_009116335.1|	1612	0	PREDICTED: cyclin-D3-1 [Brassica rapa]	gi|923504764|ref|XM_013797433.1|	1098	0	PREDICTED: Brassica napus cyclin-D3-1-like (LOC106357709), mRNA	P42753	529
BraA01g004140.3C	18.3701	35.5123	16.7987	13.2166	12.744	14.2571	16.4612	18.0772	17.3352	32.65	30.4638	28.5879	18.9701	16.8906	17.7263	25.7797	23.9311	24.9813	32.6606	23.123	21.2862	13.5198	10.6949	12.059	15.4531	17.8341	18.9986	89.9354	92.5665	91.1247	17.9793	18.1082	19.4787	31.4903	29.6638	25.6776	BraA01g004140.3C	protein_coding	chrA01:2004402-2009622:-	gi|674964568|emb|CDX69030.1|	2260	0	BnaC01g04230D [Brassica napus]	gi|685257000|ref|XM_009117878.1|	1201	0	PREDICTED: Brassica rapa uncharacterized LOC103841186 (LOC103841186), transcript variant X3, mRNA	.	.
BraA01g004160.3C	4.07314	7.2114	4.35557	9.9037	7.35074	8.32575	2.95939	3.02655	3.57877	1.39975	2.02225	1.96937	4.64114	4.71605	3.43545	6.91229	7.30922	15.8756	1.57371	4.97928	5.44007	3.10288	2.47314	2.72497	1.66383	3.48421	1.87222	1.083	1.49832	1.08151	2.89608	2.18771	2.53361	25.0673	25.7303	14.4807	BraA01g004160.3C	protein_coding	chrA01:2013098-2014453:+	gi|685257010|ref|XP_009116544.1|	2417	0	PREDICTED: UDP-glycosyltransferase 73B3-like [Brassica rapa]	gi|685257009|ref|XM_009118296.1|	1356	0	PREDICTED: Brassica rapa UDP-glycosyltransferase 73B3-like (LOC103841708), mRNA	Q8W491	747
BraA01g004220.3C	2.15529	2.91508	1.42351	1.40391	1.2973	1.43005	1.79036	1.21396	1.21737	2.09131	1.4358	1.99529	2.47602	1.49599	1.62181	4.10207	3.45374	5.63015	4.17891	3.91851	4.13374	2.16341	2.84055	3.10503	1.22351	1.22983	1.11451	6.87085	5.87627	5.55149	1.6902	1.60875	1.36628	2.95176	2.95587	2.66629	BraA01g004220.3C	protein_coding	chrA01:2047468-2049471:+	gi|685257030|ref|XP_009117488.1|	2230	0	PREDICTED: protein DJ-1 homolog C [Brassica rapa]	gi|685257029|ref|XM_009119240.1|	1383	0	PREDICTED: Brassica rapa protein DJ-1 homolog C (LOC103842567), mRNA	Q8VY09	689
BraA01g004240.3C	7.45191	7.57704	8.50127	2.8315	2.82415	1.51079	15.0841	2.02091	2.80604	3.46471	3.62471	3.56062	0.771248	1.25391	2.73182	5.13874	6.16968	2.86268	56.4606	99.3538	105.118	35.9975	43.2772	44.4405	52.6435	40.6315	37.4765	47.9439	44.427	50.1783	12.6228	10.352	11.7382	96.0863	97.4457	111.085	BraA01g004240.3C	protein_coding	chrA01:2055605-2057082:+	gi|685257038|ref|XP_009117836.1|	961	4e-130	PREDICTED: uncharacterized protein LOC103842877 isoform X1 [Brassica rapa]	gi|685257037|ref|XM_009119588.1|	600	0	PREDICTED: Brassica rapa uncharacterized LOC103842877 (LOC103842877), transcript variant X1, mRNA	.	.
BraA01g004290.3C	21.8249	44.5176	23.0325	12.1748	12.3368	11.2425	27.74	29.6479	27.7192	15.5089	13.5652	18.9048	12.7565	19.0468	16.2587	16.6521	13.1002	16.4272	27.3871	24.8655	22.566	19.9888	20.6188	25.1422	14.4117	17.6757	20.0212	32.4401	34.0621	32.6381	16.57	18.5148	19.3281	44.058	41.5843	32.8035	BraA01g004290.3C	protein_coding	chrA01:2074402-2075540:-	gi|685257052|ref|XP_009118500.1|	1119	5e-153	PREDICTED: E3 ubiquitin-protein ligase RNF170 isoform X1 [Brassica rapa]	gi|923520401|ref|XM_013810854.1|	711	0	PREDICTED: Brassica napus E3 ubiquitin-protein ligase RNF170-like (LOC106370861), transcript variant X1, mRNA	Q28DS3	84
BraA01g004410.3C	6340.6	1491.88	6361.25	1816.78	1772.52	1781.08	4927.08	5325.78	5340.63	9269.23	9403	8837.97	9284.95	10143.6	10574	87.8578	112.817	269.365	4451.31	6401.62	6762.36	5191.12	2404.91	2424.56	2521.16	3084.39	3138.7	9506.5	9032.92	9251.22	9133.26	9083.97	8493.71	404.975	417.941	318.177	BraA01g004410.3C	protein_coding	chrA01:2140451-2140975:-	gi|685257084|ref|XP_009119957.1|	937	2e-127	PREDICTED: pathogenesis-related protein 1 [Brassica rapa]	gi|685257083|ref|XM_009121709.1|	525	0	PREDICTED: Brassica rapa pathogenesis-related protein 1 (LOC103844852), mRNA	Q9ZNS4	204
BraA01g004600.3C	0	0.055198	0.057585	0	0.0641416	0	0	0	0	0.116324	0	0	0	0.0605171	0	0.0793628	0	0.0736855	1.60206	3.43015	3.26352	1.44402	1.41814	1.02823	1.02838	1.1553	0.816838	0.667068	0.679855	0.555125	0.361011	0.477242	0.663237	0.696946	0.550592	0.652546	BraA01g004600.3C	protein_coding	chrA01:2217018-2221123:+	gi|685257127|ref|XP_009122119.1|	2268	0	PREDICTED: histone deacetylase 14 [Brassica rapa]	gi|685257126|ref|XM_009123871.1|	1271	0	PREDICTED: Brassica rapa histone deacetylase 14 (LOC103846835), mRNA	Q941D6	759
BraA01g004620.3C	0.98436	0.421364	1.00477	5.16625	3.70725	4.91549	2.03717	1.44	1.59849	1.58568	2.18976	1.99895	2.14326	1.84787	2.23994	8.82781	8.96647	8.11596	2.18386	2.99254	2.52362	3.60877	3.36199	3.22376	3.16653	1.79037	2.0997	1.1518	1.53983	1.39237	4.46184	4.68401	4.64103	2.16318	2.00145	2.6524	BraA01g004620.3C	protein_coding	chrA01:2227738-2230609:-	gi|685257135|ref|XP_009122564.1|	2167	0	PREDICTED: probable polygalacturonase [Brassica rapa]	gi|685257134|ref|XM_009124316.1|	1425	0	PREDICTED: Brassica rapa probable polygalacturonase (LOC103847224), mRNA	A7PZL3	366
BraA01g004660.3C	1.41329	4.23759	2.41983	3.82835	4.09485	4.84241	7.28163	5.1414	5.66514	3.24309	3.54038	3.37916	5.00529	4.05908	4.88986	7.56782	6.39603	4.58506	4.94739	4.01932	4.79507	3.50078	4.33492	4.25847	1.6621	1.96551	1.32019	2.60549	2.91604	2.73648	2.13941	1.97654	2.67985	1.8196	1.38426	1.91757	BraA01g004660.3C	protein_coding	chrA01:2242754-2244959:+	gi|685257149|ref|XP_009123134.1|	3138	0	PREDICTED: protein CYPRO4 [Brassica rapa]	gi|685257148|ref|XM_009124886.1|	1923	0	PREDICTED: Brassica rapa protein CYPRO4 (LOC103847799), mRNA	.	.
BraA01g004710.3C	21.9015	52.4509	23.5253	56.0484	49.8018	54.3393	43.9619	46.5347	46.7494	26.5834	29.4592	27.6679	34.2777	31.4844	34.0185	82.4885	84.3784	57.8773	76.9687	62.6467	61.4728	64.7099	78.6295	73.3224	22.6653	18.8023	18.5025	30.3007	33.8768	35.3335	27.8401	27.7372	25.6982	14.3391	16.6388	19.147	BraA01g004710.3C	protein_coding	chrA01:2266051-2267973:+	gi|685257162|ref|XP_009123591.1|	2426	0	PREDICTED: cell division cycle 20.1, cofactor of APC complex-like [Brassica rapa]	gi|685257161|ref|XM_009125343.1|	1377	0	PREDICTED: Brassica rapa cell division cycle 20.1, cofactor of APC complex-like (LOC103848411), mRNA	Q9SZA4	877
BraA01g004800.3C	45.9852	67.3544	43.3365	31.2661	29.7774	30.6304	8.5113	7.62607	7.28762	3.69493	3.74663	3.75097	2.79396	1.95185	2.84847	0.542961	0.675924	1.08026	17	34.1954	32.9111	11.7904	13.8301	13.0957	11.0265	10.3406	9.7512	3.01534	3.06675	3.82502	11.5848	11.7484	10.6956	2.25309	2.66073	2.08725	BraA01g004800.3C	protein_coding	chrA01:2314063-2319737:+	gi|685257202|ref|XP_009124890.1|	5476	0	PREDICTED: alpha-aminoadipic semialdehyde synthase isoform X2 [Brassica rapa]	gi|685257201|ref|XM_009126642.1|	3166	0	PREDICTED: Brassica rapa alpha-aminoadipic semialdehyde synthase (LOC103849713), transcript variant X4, mRNA	Q9SMZ4	1903
BraA01g004860.3C	0.517225	0.379548	0.791921	2.98304	3.08731	2.67396	3.52608	3.30169	2.33715	2.53287	2.64985	2.10066	2.86659	2.08061	1.52687	4.72946	6.34053	5.0667	3.01627	1.83447	1.76802	5.65413	7.4901	8.10125	1.66383	2.50863	3.34325	2.80306	2.75691	2.54473	3.72353	1.91425	2.66029	4.17788	2.66417	2.85535	BraA01g004860.3C	protein_coding	chrA01:2328475-2329762:+	gi|685257216|ref|XP_009124988.1|	1135	1e-155	PREDICTED: rho GTPase-activating protein 7 isoform X2 [Brassica rapa]	gi|685257215|ref|XM_009126740.1|	678	0	PREDICTED: Brassica rapa rho GTPase-activating protein 7 (LOC103850027), transcript variant X2, mRNA	.	.
BraA01g004890.3C	1.3134	1.04411	1.34063	0.90899	0.746637	0.15432	0.639562	0.524004	0.83458	2.70812	2.47904	2.16704	0.953228	1.05667	1.53473	0	0	0.214433	17.8162	22.127	15.7999	12.7818	8.9716	8.04167	20.5089	17.2527	21.4787	15.4491	15.7516	14.2162	21.3619	20.138	19.5422	3.90037	4.53981	5.26536	BraA01g004890.3C	protein_coding	chrA01:2341514-2343837:+	gi|923520460|ref|XP_013666517.1|	1761	0	PREDICTED: (S)-coclaurine N-methyltransferase-like [Brassica napus]	gi|923520459|ref|XM_013811063.1|	1068	0	PREDICTED: Brassica napus (S)-coclaurine N-methyltransferase-like (LOC106371041), mRNA	Q5C9L6	337
BraA01g004960.3C	6.48046	7.95568	6.30279	12.5807	12.9982	12.9299	6.90673	5.52872	5.17975	11.4713	11.8032	11.7322	7.80929	7.3451	7.94098	7.99837	7.24474	10.7001	9.23866	8.67345	9.13089	10.3672	9.95585	9.19272	5.11331	4.01952	3.85691	6.2048	6.80074	5.715	8.15044	7.11121	6.64833	3.07917	2.78445	3.85719	BraA01g004960.3C	protein_coding	chrA01:2374791-2376708:-	gi|685257238|ref|XP_009125098.1|	2432	0	PREDICTED: UDP-sulfoquinovose synthase, chloroplastic [Brassica rapa]	gi|685257237|ref|XM_009126850.1|	1434	0	PREDICTED: Brassica rapa UDP-sulfoquinovose synthase, chloroplastic (LOC103850131), mRNA	O48917	860
BraA01g004970.3C	2.04411	0.814815	0.85005	1.25751	1.29114	0.284652	0.663587	0.644371	0.855241	8.42956	5.47096	8.2251	6.154	4.95393	5.5128	0.639014	0.618721	1.87879	0.0767827	0	0.637023	0.161485	0.413716	0.431202	0.32472	0.244797	0.313192	0.820586	1.33343	0.744961	2.66456	2.32161	3.18932	0.359723	0.0820975	0.238826	BraA01g004970.3C	protein_coding	chrA01:2378267-2380469:+	gi|685257240|ref|XP_009125109.1|	1665	0	PREDICTED: zinc transporter 9 [Brassica rapa]	gi|685257239|ref|XM_009126861.1|	1158	0	PREDICTED: Brassica rapa zinc transporter 9 (LOC103850142), mRNA	O82643	501
BraA01g005180.3C	1.50635	1.32646	0.922547	4.30911	2.9115	4.10618	3.08078	1.76289	2.042	2.79537	2.27459	1.98832	1.11314	1.61587	2.96453	0.63572	0.410355	0.196748	7.63869	9.15886	11.5658	12.6916	14.1585	12.5262	15.5062	9.09199	10.7494	4.156	3.35129	5.33607	12.2099	11.6279	9.00214	2.29036	4.08372	4.59351	BraA01g005180.3C	protein_coding	chrA01:2481306-2481887:+	gi|685257289|ref|XP_009125357.1|	1028	2e-140	PREDICTED: uncharacterized protein LOC103850364 [Brassica rapa]	gi|685257288|ref|XM_009127109.1|	582	0	PREDICTED: Brassica rapa uncharacterized LOC103850364 (LOC103850364), mRNA	.	.
BraA01g005360.3C	0.361897	0.531132	0.27705	0.876626	1.18294	1.10556	0.88113	0.86631	0.408821	1.1193	1.31737	1.19422	0.764085	0.970522	0.979306	0.509101	0.616167	0.768109	3.1198	1.3294	1.52255	1.6886	1.63155	2.00969	0.970138	1.26769	1.02927	2.22872	2.558	2.84884	1.92986	2.10474	1.81706	0.773794	0.490552	0.570817	BraA01g005360.3C	protein_coding	chrA01:2571247-2574351:-	gi|923556409|ref|XP_013738312.1|	2186	0	PREDICTED: proline-rich receptor-like protein kinase PERK14 [Brassica napus]	gi|685257333|ref|XM_009127336.1|	1561	0	PREDICTED: Brassica rapa proline-rich receptor-like protein kinase PERK14 (LOC103850563), mRNA	O65530	629
BraA01g005370.3C	1.30364	0.651039	1.28908	1.75434	1.42041	1.63384	0.97866	0.809057	0.859056	2.50599	2.59243	2.52321	1.26152	1.29645	1.18926	1.08888	1.33175	1.13514	0.564667	0.619244	0.457047	0.492411	0.519452	0.587813	0.553321	0.541542	0.617943	0.588748	0.805639	0.574575	0.289659	0.215391	0.372506	0.787178	0.618478	0.58545	BraA01g005370.3C	protein_coding	chrA01:2575383-2585692:-	gi|685257336|ref|XP_009125595.1|	10946	0	PREDICTED: helicase and polymerase-containing protein TEBICHI [Brassica rapa]	gi|685257335|ref|XM_009127347.1|	6391	0	PREDICTED: Brassica rapa helicase and polymerase-containing protein TEBICHI (LOC103850574), mRNA	Q588V7	3560
BraA01g005380.3C	6.49404	19.3061	7.64847	39.1824	42.5966	38.973	32.5958	30.5594	26.2405	47.8956	41.4869	46.4098	35.0687	39.1178	38.8329	82.9226	76.8871	72.7497	8.61279	5.56838	6.83031	10.6553	7.37051	7.11299	6.42778	7.80701	8.78276	17.9662	14.3552	16.4668	19.979	24.0345	21.0441	16.3775	7.04214	9.19243	BraA01g005380.3C	protein_coding	chrA01:2586713-2587558:-	gi|685257338|ref|XP_009125605.1|	569	2e-72	PREDICTED: two-on-two hemoglobin-3 [Brassica rapa]	gi|685257337|ref|XM_009127357.1|	351	0	PREDICTED: Brassica rapa two-on-two hemoglobin-3 (LOC103850586), mRNA	Q67XG0	204
BraA01g005430.3C	3.46716	1.67414	3.53904	1.03878	0.76792	0.846499	1.5787	2.05995	1.42426	10.5378	10.1988	10.104	4.27811	4.63697	5.22836	0.760122	0.30666	1.29387	9.49881	3.01156	4.73596	3.02543	2.11614	1.94911	9.41512	7.71658	7.21813	22.4061	19.4511	21.2232	4.51422	5.71367	5.33775	3.89388	2.83205	3.78786	BraA01g005430.3C	protein_coding	chrA01:2603103-2606797:+	gi|685257356|ref|XP_009125694.1|	3190	0	PREDICTED: potassium channel KAT3 isoform X1 [Brassica rapa]	gi|685257355|ref|XM_009127446.1|	1921	0	PREDICTED: Brassica rapa potassium channel KAT3 (LOC103850658), transcript variant X1, mRNA	P92960	1032
BraA01g005500.3C	7.21985	21.1922	8.77324	4.91746	5.86329	4.52429	6.36176	6.40107	5.63151	4.25335	4.26437	4.53805	3.6294	4.60998	4.90543	16.444	14.751	11.0017	6.10196	8.1873	7.23209	4.4	8.26654	8.22429	3.13354	1.85278	1.42226	3.72643	4.46182	4.0596	2.20004	4.36256	3.1998	10.6182	8.76125	7.41111	BraA01g005500.3C	protein_coding	chrA01:2664198-2665226:-	gi|674957865|emb|CDX75257.1|	728	8e-96	BnaA01g04450D [Brassica napus]	gi|923505066|ref|XM_013807140.1|	495	0	PREDICTED: Brassica napus photosynthetic NDH subunit of subcomplex B 3, chloroplastic-like (LOC106367345), mRNA	Q9LU21	93.2
BraA01g005610.3C	4.20637	7.03984	4.06759	2.91118	1.82488	2.70527	2.91073	3.76859	3.18869	3.19538	2.6863	3.428	2.16183	1.8405	2.34187	6.92951	7.46333	7.08442	2.46984	2.69215	2.91064	1.29861	2.23814	2.52188	1.00891	0.596539	0.744127	2.89042	3.02706	2.72306	1.18058	1.22903	1.46402	3.62911	1.92058	1.33857	BraA01g005610.3C	protein_coding	chrA01:2720874-2722457:-	gi|685257416|ref|XP_009125984.1|	2842	0	PREDICTED: pentatricopeptide repeat-containing protein At4g32450, mitochondrial [Brassica rapa]	gi|685257415|ref|XM_009127736.1|	1584	0	PREDICTED: Brassica rapa pentatricopeptide repeat-containing protein At4g32450, mitochondrial (LOC103850933), mRNA	Q9SUU7	731
BraA01g005740.3C	17.1901	18.8787	17.3316	10.2622	11.0086	10.7501	14.3157	14.4071	14.1878	8.71647	8.74063	7.90774	8.29578	8.95653	7.35297	7.30404	6.35533	12.4176	14.232	19.3395	22.6187	16.3129	15.4518	16.4646	13.0157	15.465	14.912	9.33335	10.4716	9.97639	10.7757	10.2016	10.2765	61.5421	54.4012	38.6971	BraA01g005740.3C	protein_coding	chrA01:2768665-2771163:-	gi|923505154|ref|XP_013665094.1|	3894	0	PREDICTED: G-type lectin S-receptor-like serine/threonine-protein kinase SD2-5 [Brassica napus]	gi|199579999|gb|AC232479.1|	2499	0	Brassica rapa subsp. pekinensis clone KBrB035P03, complete sequence	Q8RWZ5	1228
BraA01g005800.3C	2.64572	6.58924	3.31434	5.9926	5.46919	4.97379	5.97319	3.96633	4.619	7.93491	5.18835	6.22742	3.55472	5.93416	4.26015	8.79718	7.37119	8.16788	3.65903	3.16854	3.41515	3.976	4.60025	4.5207	2.83695	3.37008	3.10936	3.55495	4.01328	4.14174	4.2326	5.21382	7.18689	2.28565	2.21697	2.40268	BraA01g005800.3C	protein_coding	chrA01:2798741-2799842:+	gi|923505175|ref|XP_013665596.1|	1136	3e-155	PREDICTED: uncharacterized protein LOC106370040 [Brassica napus]	gi|685257478|ref|XM_009128040.1|	700	0	PREDICTED: Brassica rapa uncharacterized LOC103851195 (LOC103851195), mRNA	Q84WS8	64.3
BraA01g005940.3C	5.19314	5.82014	5.34899	5.75057	6.22639	5.54703	5.74727	7.68483	6.07981	5.59726	6.16128	5.65634	9.81815	10.7869	9.05883	12.0872	12.9895	10.236	7.85242	6.9848	7.94478	5.94131	7.63644	6.72229	5.92285	6.76758	6.00554	8.65249	9.93432	9.01222	4.6323	4.29325	4.57891	16.3752	15.6144	14.2972	BraA01g005940.3C	protein_coding	chrA01:2843458-2847743:-	gi|685257509|ref|XP_009126418.1|	3232	0	PREDICTED: neurochondrin [Brassica rapa]	gi|685257508|ref|XM_009128170.1|	1848	0	PREDICTED: Brassica rapa neurochondrin (LOC103851323), mRNA	Q5ZIG0	98.6
BraA01g005960.3C	51.3763	78.5143	46.3072	27.4016	28.6702	27.2474	81.1354	53.1554	54.4437	51.8734	49.1853	50.3703	37.6916	41.7129	44.2935	34.645	31.4583	27.7034	95.8458	72.2429	72.2553	55.4214	64.9081	59.8661	57.2377	52.0721	51.1841	146.414	149.539	138.212	55.5482	60.0585	58.9911	102.684	86.6354	83.7613	BraA01g005960.3C	protein_coding	chrA01:2852066-2854106:-	gi|685257515|ref|XP_009126447.1|	976	6e-131	PREDICTED: uncharacterized protein LOC103851348 [Brassica rapa]	gi|685257514|ref|XM_009128199.1|	744	0	PREDICTED: Brassica rapa uncharacterized LOC103851348 (LOC103851348), mRNA	.	.
BraA01g006040.3C	1.42971	2.6858	1.3426	7.12427	7.54234	7.14944	4.06579	4.44156	4.65144	8.19525	8.94382	7.78087	6.15791	6.2573	6.19013	7.16004	7.78951	4.70578	8.23603	4.63619	5.3533	12.6862	15.8132	15.8301	10.67	6.65695	7.03824	6.08586	7.52784	7.25921	14.8212	14.332	13.7266	6.46713	6.69762	7.3966	BraA01g006040.3C	protein_coding	chrA01:2919353-2921232:+	gi|685257536|ref|XP_009126559.1|	2284	0	PREDICTED: U-box domain-containing protein 14 [Brassica rapa]	gi|685257537|ref|XR_629776.1|	1530	0	PREDICTED: Brassica rapa U-box domain-containing protein 14 (LOC103851456), transcript variant X2, misc_RNA	Q9CAG5	111
BraA01g006100.3C	2.75042	28.7608	3.15837	39.9742	43.7793	46.374	25.2796	29.6278	25.8273	27.4695	28.3673	27.0537	23.0467	24.5251	21.9899	71.8214	70.9455	47.5991	64.6808	35.188	37.7877	62.8834	67.4474	65.4027	20.2759	14.2664	11.5559	38.9581	33.9417	38.2279	29.7006	28.1748	27.6193	13.3952	11.1846	16.8106	BraA01g006100.3C	protein_coding	chrA01:2951756-2952394:-	gi|685257545|ref|XP_009126596.1|	684	4e-89	PREDICTED: early nodulin-like protein 1 [Brassica rapa]	gi|685257544|ref|XM_009128348.1|	510	0	PREDICTED: Brassica rapa early nodulin-like protein 1 (LOC103851494), mRNA	Q9SK27	182
BraA01g006120.3C	0.808947	1.58298	1.23858	6.765	7.01296	4.89498	7.92758	4.41082	3.71245	2.1371	2.12673	1.33472	1.44109	2.06093	1.79103	2.48935	2.47917	1.91506	6.51218	4.81606	6.38126	7.87256	9.06225	10.4819	4.60815	5.55834	5.90865	3.58693	4.03064	3.8805	8.03448	7.64517	8.96537	24.3113	11.1298	9.19743	BraA01g006120.3C	protein_coding	chrA01:2960688-2964047:+	gi|685257549|ref|XP_009126615.1|	2598	0	PREDICTED: BTB/POZ domain-containing protein NPY1 [Brassica rapa]	gi|685257548|ref|XM_009128367.1|	1734	0	PREDICTED: Brassica rapa BTB/POZ domain-containing protein NPY1 (LOC103851510), mRNA	Q8H1D3	880
BraA01g006180.3C	1.74989	1.19849	0.178617	14.3715	11.5393	14.6391	12.4408	10.798	9.29088	2.34528	0.94369	2.13211	5.72663	8.0716	6.0267	1.96934	2.14515	1.5999	24.3139	4.25585	4.60125	16.2365	17.5951	11.5614	8.63132	5.28098	3.98148	1.55183	3.08205	0.860943	10.8246	15.9133	12.0005	4.65615	5.12348	4.41614	BraA01g006180.3C	protein_coding	chrA01:2985910-2986410:-	gi|685257565|ref|XP_009126700.1|	632	3e-81	PREDICTED: protein GLUTAMINE DUMPER 1 [Brassica rapa]	gi|923520571|ref|XM_013811481.1|	501	0	PREDICTED: Brassica napus protein GLUTAMINE DUMPER 1-like (LOC106371410), mRNA	O81775	175
BraA01g006240.3C	0.73058	1.42963	0.845156	3.73039	4.15317	4.57815	4.07934	3.16091	3.74139	16.1184	15.9172	15.7261	4.83316	4.23196	4.98437	13.9089	12.273	10.1784	1.23492	0.296136	0.358591	0.675278	0.692009	0.83222	0.940063	0.314973	0.402974	2.20763	1.71568	2.54007	1.40253	1.49357	1.14519	2.0828	1.53167	1.33159	BraA01g006240.3C	protein_coding	chrA01:3014121-3018591:+	gi|685257584|ref|XP_009126794.1|	1363	3e-180	PREDICTED: B3 domain-containing protein REM3-like isoform X1 [Brassica rapa]	gi|685257583|ref|XM_009128546.1|	760	0	PREDICTED: Brassica rapa B3 domain-containing protein REM3-like (LOC103851661), transcript variant X1, mRNA	Q8VZQ9	234
BraA01g006300.3C	10.1303	5.38432	10.2956	13.8605	14.9365	13.8579	5.74328	6.67786	6.31554	9.82693	9.99737	10.2858	11.4955	10.1935	10.4711	11.0475	10.3786	10.9436	6.30661	7.20372	6.83201	6.84982	7.49814	6.98366	7.82603	9.04641	9.17862	4.43002	4.89832	4.71119	7.06791	6.56	6.74987	7.8651	8.12027	7.55178	BraA01g006300.3C	protein_coding	chrA01:3035174-3042990:-	gi|923505303|ref|XP_013669252.1|	8325	0	PREDICTED: early endosome antigen 1-like isoform X3 [Brassica napus]	gi|923505302|ref|XM_013813798.1|	4931	0	PREDICTED: Brassica napus early endosome antigen 1-like (LOC106373523), transcript variant X3, mRNA	.	.
BraA01g006520.3C	10.0528	6.176	7.3976	1.51014	3.45543	3.29627	8.19662	8.45672	5.01787	0.723069	1.26077	3.798	1.9744	1.75548	2.53053	0.328879	0	0	12.8037	11.6085	9.83564	2.49334	2.81062	3.99465	15.2917	7.30736	8.22066	0	0.216717	1.61031	4.73743	5.43865	7.10018	0.666495	0.760551	0.491664	BraA01g006520.3C	protein_coding	chrA01:3130560-3130934:-	gi|685257634|ref|XP_009127035.1|	544	3e-69	PREDICTED: flowering-promoting factor 1-like protein 1 [Brassica rapa]	gi|199580272|gb|AC189578.2|	375	0	Brassica rapa subsp. pekinensis clone KBrH011G12, complete sequence	.	.
BraA01g006580.3C	0.160567	0	0	1.92619	1.2779	2.41485	0	0.512487	0.181386	0.993227	0.692731	0.652128	0.847525	0.516723	0.79	0.225879	0.218706	0.20972	1.95416	0.325425	0.675525	4.45238	1.5794	3.65811	1.03304	1.38449	0.996363	0.949289	1.3396	1.89597	5.13747	4.2447	4.8765	0.457757	0.522357	0.675362	BraA01g006580.3C	protein_coding	chrA01:3153839-3154384:+	gi|685257648|ref|XP_009127095.1|	911	4e-123	PREDICTED: uncharacterized protein LOC103851967 [Brassica rapa]	gi|685257647|ref|XM_009128847.1|	546	0	PREDICTED: Brassica rapa uncharacterized LOC103851967 (LOC103851967), mRNA	Q9FJF9	69.3
BraA01g006620.3C	1.17116	0	1.02466	0.102926	0.380443	0.314529	0.0543139	0	0.189002	1.3799	0.902269	1.01926	0.765361	0.598241	0.713412	0	0	0	0.904981	1.46938	0.234629	0.237914	0.182856	0.508226	0.897007	0.84153	1.09587	0.43962	0.361884	0.603646	1.07063	1.12047	1.52983	0.476976	0.0604764	0.175929	BraA01g006620.3C	protein_coding	chrA01:3168034-3171555:+	gi|923673057|ref|XP_013651335.1|	1219	2e-163	PREDICTED: probable LRR receptor-like serine/threonine-protein kinase At4g31250 [Brassica napus]	gi|685258278|ref|XM_009131900.1|	838	0	PREDICTED: Brassica rapa probable LRR receptor-like serine/threonine-protein kinase At4g31250 (LOC103854932), mRNA	C0LGR9	421
BraA01g006680.3C	19.7438	4.13529	18.7356	30.3097	30.3421	29.1148	11.2313	11.7554	11.4588	20.853	20.188	16.9816	19.9505	21.3735	19.9628	9.08835	7.89509	17.5073	8.81795	8.01526	6.73152	12.1061	12.9999	10.3168	10.7473	14.382	11.1775	6.42536	5.31718	6.29769	13.7162	12.3861	14.1966	12.7378	11.3926	9.7774	BraA01g006680.3C	protein_coding	chrA01:3190104-3192089:-	gi|685257672|ref|XP_009127212.1|	2563	0	PREDICTED: glucan endo-1,3-beta-glucosidase 5 [Brassica rapa]	gi|685257671|ref|XM_009128964.1|	1452	0	PREDICTED: Brassica rapa glucan endo-1,3-beta-glucosidase 5 (LOC103852070), mRNA	Q9M088	880
BraA01g006730.3C	7.55657	12.5624	5.59721	9.56485	8.66748	11.4401	4.36351	6.04743	5.36355	2.96453	1.87529	3.66654	4.0239	3.37151	3.88239	4.51551	4.28102	7.94826	23.0594	22.1594	27.1493	11.1259	15.0559	14.8543	12.5485	10.7393	11.8956	18.5817	19.0929	15.9899	8.4872	9.05122	6.55143	6.41838	8.19435	9.00071	BraA01g006730.3C	protein_coding	chrA01:3224880-3226724:+	gi|685257682|ref|XP_009127292.1|	2084	0	PREDICTED: chloroplast envelope membrane protein [Brassica rapa]	gi|685257681|ref|XM_009129044.1|	1311	0	PREDICTED: Brassica rapa chloroplast envelope membrane protein (LOC103852137), mRNA	A6MVV9	144
BraA01g007020.3C	6.84631	3.86629	7.41036	5.34246	5.79876	4.62134	5.9069	7.87049	7.94164	6.72666	7.33467	8.81758	3.73498	3.89384	3.57189	8.20906	7.07217	4.50107	0.885415	0.884684	1.06321	1.96017	2.31005	1.77959	0.640504	0.792384	1.04545	1.72046	1.49078	1.7181	1.17612	1.40903	1.66557	2.48888	0.896877	1.54611	BraA01g007020.3C	protein_coding	chrA01:3355342-3357637:+	gi|923505349|ref|XP_013670367.1|	2376	0	PREDICTED: QWRF motif-containing protein 8-like [Brassica napus]	gi|923506002|ref|XM_013834771.1|	1905	0	PREDICTED: Brassica napus QWRF motif-containing protein 8-like (LOC106394156), mRNA	Q9SUH5	776
BraA01g007150.3C	0	0	0	0.301866	0	0	0.212392	0	0	0	0	0	0.230223	0	0	0	0	0.142422	0	0.220997	0.114688	0	0.119175	0.124212	0.116923	0.235054	0.225545	0.429778	0.303242	0.107297	0.116296	0.461216	0	2.69416	2.48314	1.26126	BraA01g007150.3C	protein_coding	chrA01:3408459-3409468:-	gi|685257759|ref|XP_009127652.1|	1431	0	PREDICTED: uncharacterized protein LOC103852500 [Brassica rapa]	gi|685257758|ref|XM_009129404.1|	804	0	PREDICTED: Brassica rapa uncharacterized LOC103852500 (LOC103852500), mRNA	Q8LFW5	261
BraA01g007190.3C	1.36375	0.571852	1.69031	1.79778	2.10427	1.19032	0.56921	0.310909	0.330123	1.40597	1.68103	1.78031	3.29066	2.9258	3.25901	3.15176	4.77653	3.18076	2.66743	3.94849	3.48346	2.18167	1.70341	2.33022	6.16264	3.98965	2.92156	7.96665	8.66868	8.24324	7.68793	6.07728	5.24879	1.20339	1.69011	1.12673	BraA01g007190.3C	protein_coding	chrA01:3427460-3428670:-	gi|685257767|ref|XP_009127692.1|	1582	0	PREDICTED: putative F-box/LRR-repeat protein 19 [Brassica rapa]	gi|685257766|ref|XM_009129444.1|	546	0	PREDICTED: Brassica rapa putative F-box/LRR-repeat protein 19 (LOC103852542), mRNA	.	.
BraA01g007210.3C	0	0	0	0	0	0	0	0	0	0	0	0	0	0	0	0	0	0	28.5738	27.8139	30.9062	16.8748	10.8522	10.943	23.4583	25.3196	27.6349	46.0563	44.6754	42.8949	19.458	16.9019	18.8229	19.4087	23.2858	23.8532	BraA01g007210.3C	protein_coding	chrA01:3438915-3441324:-	gi|685257769|ref|XP_009127704.1|	1128	9e-152	PREDICTED: putative F-box/LRR-repeat protein 19 [Brassica rapa]	gi|685257770|ref|XM_009129462.1|	636	0	PREDICTED: Brassica rapa putative F-box/LRR-repeat protein 19 (LOC103852549), transcript variant X2, mRNA	.	.
BraA01g007240.3C	517.169	358.945	506.38	568.127	570.655	559.556	936.022	1002.22	990.632	678.417	699.828	657.391	850.032	916.831	905.871	343.292	349.676	464.112	277.016	331.413	326.834	425.034	295.848	318.564	650.304	873.641	855.637	257.779	245.533	256.623	753.355	736.464	699.319	391.444	410.324	388.091	BraA01g007240.3C	protein_coding	chrA01:3462720-3463937:-	gi|685257779|ref|XP_009127746.1|	1232	1e-169	PREDICTED: putative glutamine amidotransferase-like protein C13C5.04 [Brassica rapa]	gi|685257778|ref|XM_009129498.1|	753	0	PREDICTED: Brassica rapa putative glutamine amidotransferase-like protein C13C5.04 (LOC103852592), mRNA	Q9M0A7	429
BraA01g007290.3C	349.616	151.801	378.557	353.019	344.537	332.623	406.726	429.243	425.358	228.607	235.153	227.124	169.768	174.788	168.353	20.1812	19.0579	13.1857	126.276	108.045	116.053	74.4223	52.2636	48.0166	190.482	185.357	176.759	50.9586	52.5374	45.486	142.047	145.143	143.149	60.5904	64.1475	75.6119	BraA01g007290.3C	protein_coding	chrA01:3489284-3489778:+	gi|674893584|emb|CDY39206.1|	153	1e-10	BnaA03g50180D [Brassica napus]	gi|685257785|ref|XM_009129539.1|	495	0	PREDICTED: Brassica rapa glycine-rich cell wall structural protein 2-like (LOC103852642), mRNA	.	.
BraA01g007310.3C	39.4173	66.5609	38.9165	51.7384	50.6107	52.8936	65.7901	72.0875	73.7786	99.1417	105.26	99.0902	60.4085	69.3298	63.0625	80.2121	81.0899	33.0207	120.827	59.0207	56.9695	63.4206	87.4977	88.5637	74.0391	65.2652	69.4427	269.402	266.549	267.092	53.0569	53.1792	56.5937	114.699	113.788	97.761	BraA01g007310.3C	protein_coding	chrA01:3494594-3495883:+	gi|922417839|ref|XP_013606421.1|	2102	0	PREDICTED: UDP-glucuronate 4-epimerase 1 [Brassica oleracea var. oleracea]	gi|685257789|ref|XM_009129560.1|	1287	0	PREDICTED: Brassica rapa UDP-glucuronate 4-epimerase 1 (LOC103852660), mRNA	Q9M0B6	807
BraA01g007330.3C	0	0	0.175465	0	0	0	0.0837074	0.182888	0	0.531668	0.370815	0.523621	0	0	0	0.120912	0.117072	0.449048	1.91776	2.43877	2.53123	2.75	2.34845	2.4477	1.01379	0.370556	0.800021	1.43976	0.956104	0.422875	1.55836	2.63571	2.10513	0.408391	0.466024	0.632656	BraA01g007330.3C	protein_coding	chrA01:3500314-3509033:-	gi|923505935|ref|XP_013688925.1|	1593	0	PREDICTED: WAT1-related protein At4g30420-like [Brassica napus]	gi|923505934|ref|XM_013833471.1|	927	0	PREDICTED: Brassica napus WAT1-related protein At4g30420-like (LOC106392644), mRNA	Q9M0B8	505
BraA01g007360.3C	27.2266	34.986	38.7222	36.6814	33.019	40.6062	48.6127	40.3602	33.0123	20.0229	15.8575	23.59	22.2273	24.5331	16.9678	31.407	33.6236	11.1425	32.2153	26.1189	30.5455	26.5207	25.194	25.0183	25.4965	19.5635	19.7107	10.3734	10.0955	10.0019	38.33	33.7805	32.1862	35.1876	19.4862	27.1026	BraA01g007360.3C	protein_coding	chrA01:3524054-3524536:+	gi|685257802|ref|XP_009127869.1|	752	9e-100	PREDICTED: RING-H2 finger protein ATL14 [Brassica rapa]	gi|685257801|ref|XM_009129621.1|	474	0	PREDICTED: Brassica rapa RING-H2 finger protein ATL14 (LOC103852719), mRNA	Q9M0C3	178
BraA01g007380.3C	7.34625	9.37254	6.34238	15.738	16.7782	15.8486	9.01407	8.6421	9.02994	7.2734	7.43477	8.28051	6.18365	5.34614	6.08238	5.14443	5.1133	5.32592	9.22294	13.741	13.9556	17.1538	24.0514	21.0866	12.6313	15.2777	13.6891	7.90829	7.85989	7.61081	11.0794	9.3423	9.63837	21.8044	21.3019	20.452	BraA01g007380.3C	protein_coding	chrA01:3533019-3535893:-	gi|685257806|ref|XP_009127888.1|	4145	0	PREDICTED: chaperone protein ClpB1 [Brassica rapa]	gi|685257805|ref|XM_009129640.1|	2706	0	PREDICTED: Brassica rapa chaperone protein ClpB1 (LOC103852740), mRNA	Q9M0C5	1309
BraA01g007420.3C	20.1361	10.6086	16.5483	21.0588	23.246	23.004	5.63176	6.15226	7.11572	105.075	103.913	109.251	32.2671	35.3356	35.7672	4.21268	5.20411	6.74366	82.5259	57.553	49.743	37.6643	25.1674	26.8192	63.0031	63.4397	70.0576	122.71	112.379	126.199	43.8325	45.2056	47.4465	8.92977	10.9738	8.79522	BraA01g007420.3C	protein_coding	chrA01:3556307-3557350:+	gi|685257812|ref|XP_009127924.1|	1364	0	PREDICTED: probable xyloglucan endotransglucosylase/hydrolase protein 17 [Brassica rapa]	gi|923505919|ref|XM_013832960.1|	849	0	PREDICTED: Brassica napus probable xyloglucan endotransglucosylase/hydrolase protein 17 (LOC106392146), mRNA	O80803	471
BraA01g007440.3C	1475.72	717.138	1484.07	223.928	230.347	220.139	254.234	277.071	275.064	328.745	322.432	334.988	166.895	162.388	174.365	90.9357	96.0651	90.6348	206.943	166.799	184.853	74.9983	70.5364	67.8715	99.9855	91.4867	90.3487	215.404	215.09	202.203	125.33	132.232	122.208	237.866	210.742	215.32	BraA01g007440.3C	protein_coding	chrA01:3566088-3567130:+	gi|923505908|ref|XP_013687835.1|	1420	0	PREDICTED: xyloglucan endotransglucosylase/hydrolase protein 24-like isoform X2 [Brassica napus]	gi|923505913|ref|XM_013832653.1|	849	0	PREDICTED: Brassica napus xyloglucan endotransglucosylase/hydrolase protein 24-like (LOC106391891), mRNA	P24806	490
BraA01g007490.3C	4.96931	6.06645	4.79312	7.32013	8.0342	6.47083	5.86082	5.86895	7.87969	9.44728	10.5228	9.72088	4.09086	5.62403	4.80014	11.0952	13.7235	5.35916	12.5303	7.85385	8.72702	7.87676	8.57019	9.14013	9.2882	7.12496	5.18648	11.8595	13.2701	13.5927	8.75213	8.29181	9.15616	5.0689	3.41121	5.03361	BraA01g007490.3C	protein_coding	chrA01:3601964-3604198:+	gi|685257824|ref|XP_009127990.1|	2969	0	PREDICTED: VIN3-like protein 2 [Brassica rapa]	gi|685257823|ref|XM_009129742.1|	1920	0	PREDICTED: Brassica rapa VIN3-like protein 2 (LOC103852843), mRNA	Q9SUM4	902
BraA01g007530.3C	102.776	61.9359	105.09	57.9162	54.5918	62.0375	36.6046	39.031	44.1857	124.498	123.071	121.152	75.8434	74.6561	73.4384	10.7518	13.4723	39.6959	82.6219	76.4487	68.4712	35.7698	22.7012	26.5286	48.3048	42.6424	45.102	58.5648	62.9313	63.2621	59.5535	67.4127	62.8093	8.03212	8.19055	8.88777	BraA01g007530.3C	protein_coding	chrA01:3636357-3637921:-	gi|923520834|ref|XP_013667869.1|	1653	0	PREDICTED: peroxidase 45-like [Brassica napus]	gi|685257829|ref|XM_009129773.1|	972	0	PREDICTED: Brassica rapa peroxidase 45 (LOC103852874), mRNA	Q96522	578
BraA01g007590.3C	4.01693	0.524034	4.20271	3.8921	3.27306	3.64993	4.0425	3.56139	3.89492	3.27852	4.33254	3.87467	6.64351	6.89437	6.52198	1.4598	1.27666	2.49214	1.56169	2.17099	2.60537	8.99657	7.64631	7.01619	3.30225	5.48406	5.2622	2.80365	2.26523	3.0633	9.49656	8.9554	9.37928	5.31236	4.13817	3.83672	BraA01g007590.3C	protein_coding	chrA01:3683196-3687325:+	gi|685257844|ref|XP_009128090.1|	4479	0	PREDICTED: cadmium/zinc-transporting ATPase HMA2 [Brassica rapa]	gi|685257843|ref|XM_009129842.1|	2619	0	PREDICTED: Brassica rapa cadmium/zinc-transporting ATPase HMA2 (LOC103852939), mRNA	Q9SZW4	1380
BraA01g007690.3C	5.86386	3.24488	5.29858	2.04024	1.69405	2.25896	0.889391	0.97159	0.760151	3.0227	2.38468	2.68413	3.5518	2.37171	2.97965	0.338075	0.130936	0.313891	1.41366	1.60732	1.56715	1.69161	1.05062	1.42353	2.88616	2.48663	3.42991	1.51553	1.6931	1.08779	3.12698	3.30361	3.90834	0.456754	0.781817	0.90974	BraA01g007690.3C	protein_coding	chrA01:3729649-3732159:+	gi|685257866|ref|XP_009128190.1|	3033	0	PREDICTED: senescence-induced receptor-like serine/threonine-protein kinase [Brassica rapa]	gi|685257865|ref|XM_009129942.1|	1094	0	PREDICTED: Brassica rapa senescence-induced receptor-like serine/threonine-protein kinase (LOC103853036), mRNA	O65924	710
BraA01g007740.3C	0	0	0	0	0	0	0	0	0	0	0	0	0	0	0	0	0	0	0.740953	0.24678	0	0.519445	0	0.554813	1.56677	1.83734	2.26673	3.11947	2.70896	3.59444	1.29864	1.54507	0.715744	0.462844	1.3204	0.256075	BraA01g007740.3C	protein_coding	chrA01:3754498-3755042:+	gi|685257878|ref|XP_009128244.1|	626	7e-82	PREDICTED: uncharacterized protein LOC103853082 isoform X2 [Brassica rapa]	gi|685345873|ref|XM_009110786.1|	358	0	PREDICTED: Brassica rapa glutathione S-transferase T3-like (LOC103834714), transcript variant X2, mRNA	.	.
BraA01g007860.3C	21.8084	27.3123	19.3666	30.3878	24.0512	30.5438	18.9029	19.7218	19.7088	15.9633	25.4036	18.3788	43.282	38.6	42.2756	51.234	41.5867	57.8234	3.09652	3.97795	5.27565	5.11692	3.3369	5.71375	3.97539	2.5856	2.70654	1.934	2.22377	1.50215	5.81479	3.68972	4.2731	36.0603	8.98662	4.58642	BraA01g007860.3C	protein_coding	chrA01:3819297-3820151:+	gi|685257924|ref|XP_009128419.1|	257	9e-40	PREDICTED: transmembrane protein 230-like [Brassica rapa]	gi|685257923|ref|XM_009130171.1|	191	2e-94	PREDICTED: Brassica rapa transmembrane protein 230-like (LOC103853246), mRNA	Q5ZLH4	51.2
BraA01g007900.3C	7.05954	3.74809	6.14456	1.86848	0.684417	1.33744	3.89067	3.31869	5.0693	7.50376	5.96151	5.72322	1.15543	0.587038	0.915453	0.923818	0.596321	0.500344	4.21816	3.71557	3.74132	1.69257	1.55508	1.80782	2.81667	3.36207	2.60348	6.14727	6.59485	6.785	2.0428	1.96751	2.25178	2.34022	2.25507	1.55371	BraA01g007900.3C	protein_coding	chrA01:3828680-3830356:+	gi|923520778|ref|XP_013667717.1|	2723	0	PREDICTED: patatin-like protein 8 [Brassica napus]	gi|923520777|ref|XM_013812263.1|	1602	0	PREDICTED: Brassica napus patatin-like protein 8 (LOC106372122), mRNA	Q8H133	947
BraA01g007940.3C	0.428852	0.959081	0.375208	1.80909	1.5324	1.38208	1.01432	1.36878	1.10733	0.757934	1.32156	1.61733	0.452724	0.52575	1.68798	3.36119	3.58824	2.40057	4.47368	4.46998	4.57502	7.44864	7.76711	8.72348	2.6934	3.1035	3.67492	4.0446	3.4075	4.1596	3.13633	3.30393	2.6409	5.29796	4.71691	4.05854	BraA01g007940.3C	protein_coding	chrA01:3851956-3855065:+	gi|685257945|ref|XP_009128524.1|	2557	0	PREDICTED: WD-40 repeat-containing protein MSI5 [Brassica rapa]	gi|685257944|ref|XM_009130276.1|	1428	0	PREDICTED: Brassica rapa WD-40 repeat-containing protein MSI5 (LOC103853344), mRNA	Q9SU78	758
BraA01g007990.3C	13.053	20.3325	14.6494	14.9216	16.1697	14.6501	25.6145	27.9818	24.9426	20.9556	18.3512	21.7594	6.3071	6.82686	6.70973	4.84183	3.89199	5.17404	30.4943	13.5565	15.095	5.40223	4.25852	4.21658	4.03879	2.44979	3.69392	18.1729	14.809	17.3172	2.83969	2.33478	2.22676	0.4937	0.774636	1.09259	BraA01g007990.3C	protein_coding	chrA01:3877407-3878756:+	gi|685257952|ref|XP_009128542.1|	2326	0	PREDICTED: venom phosphodiesterase 2-like [Brassica rapa]	gi|685257951|ref|XM_009130294.1|	1350	0	PREDICTED: Brassica rapa venom phosphodiesterase 2-like (LOC103853369), mRNA	J3SBP3	259
BraA01g008000.3C	5.46347	6.58873	5.18766	26.6736	26.7247	24.2443	7.61009	7.43478	9.25779	15.0639	15.5541	16.0615	45.6713	45.4544	37.0077	24.4872	25.1806	34.8501	6.95851	4.50642	4.07591	3.92971	2.29127	1.59207	4.08723	4.79306	4.20494	6.6354	7.12575	6.31371	5.48815	4.90393	4.3567	6.15783	7.57796	5.47777	BraA01g008000.3C	protein_coding	chrA01:3881004-3882383:+	gi|685257955|ref|XP_009128553.1|	2404	0	PREDICTED: venom phosphodiesterase 2-like [Brassica rapa]	gi|685257954|ref|XM_009130305.1|	1380	0	PREDICTED: Brassica rapa venom phosphodiesterase 2-like (LOC103853385), mRNA	J3SEZ3	265
BraA01g008200.3C	11.3173	14.4042	11.1014	8.75618	9.49807	8.11918	10.6228	12.1748	11.1465	18.5252	18.9048	18.2768	13.1121	11.4976	11.2915	12.8607	11.6365	10.2937	2.11016	1.85285	2.55308	1.88278	1.17144	1.22095	2.46762	4.28118	2.57564	5.87085	6.39981	6.32807	2.42076	2.60012	2.03836	8.02861	3.692	2.32042	BraA01g008200.3C	protein_coding	chrA01:3957460-3960777:+	gi|685258002|ref|XP_009128734.1|	4077	0	PREDICTED: uncharacterized protein LOC103853576 isoform X1 [Brassica rapa]	gi|685258001|ref|XM_009130486.1|	2781	0	PREDICTED: Brassica rapa uncharacterized LOC103853576 (LOC103853576), transcript variant X1, mRNA	P53990	117
BraA01g008230.3C	103.905	288.706	113.723	365.174	346.097	353.471	296.068	311.988	314.763	157.962	164.382	173.704	239.301	224.224	240.632	500.171	510.27	439.21	207.673	180.355	157.951	214.487	243.534	231.403	104.451	95.3667	82.4837	102.983	101.022	102.641	85.7101	100.859	95.2337	143.674	89.3472	109.259	BraA01g008230.3C	protein_coding	chrA01:3964959-3966494:+	gi|922412059|ref|XP_013637146.1|	741	2e-98	PREDICTED: 60S ribosomal protein L28-2 [Brassica oleracea var. oleracea]	gi|923505746|ref|XM_013826198.1|	429	0	PREDICTED: Brassica napus 60S ribosomal protein L28-2 (LOC106386309), mRNA	Q9M0E2	271
BraA01g008250.3C	143.333	324.049	159.562	257.254	299.028	286.025	204.645	347.428	366.803	148.248	177.108	185.096	195.383	171.169	185.316	755.639	719.638	531.944	198.999	213.876	124.897	261.701	316.854	233.55	103.457	103.991	102.662	120.665	116.528	124.607	107.354	103.986	101.34	1.76321	82.9967	138.037	BraA01g008250.3C	protein_coding	chrA01:3969915-3970699:+	gi|567205933|ref|XP_006408892.1|	252	6e-27	hypothetical protein EUTSA_v10002144mg [Eutrema salsugineum]	gi|685258013|ref|XM_009130526.1|	189	1e-93	PREDICTED: Brassica rapa 40S ribosomal protein S30 (LOC103853615), mRNA	P49689	99.8
BraA01g008290.3C	469.262	224.487	467.897	655.224	672.47	653.351	373.985	372.063	381.96	1009.91	986.995	997.808	789.095	815.562	820.377	554.814	555.617	604.397	269.682	201.666	220.489	197.303	156.263	158.466	384.571	337.88	356.182	417.648	395.374	413.509	460.812	476.291	474.402	348.854	198.781	217.642	BraA01g008290.3C	protein_coding	chrA01:3998454-3999112:-	gi|685258028|ref|XP_009128837.1|	628	6e-82	PREDICTED: profilin-1 [Brassica rapa]	gi|685258027|ref|XM_009130589.1|	363	0	PREDICTED: Brassica rapa profilin-1 (LOC103853676), mRNA	Q42449	225
BraA01g008360.3C	1.78462	2.7283	1.82162	4.52876	3.67761	4.19373	1.73805	1.89868	1.89002	2.98979	2.04514	2.49153	6.82937	4.66628	7.13412	2.66744	2.4308	5.53598	25.1132	33.9087	38.5964	43.4192	37.1808	38.6252	37.7939	55.3005	51.4483	11.8697	11.2701	13.7192	40.5651	40.8088	41.3055	35.1902	36.6487	35.5377	BraA01g008360.3C	protein_coding	chrA01:4042639-4044123:+	gi|685258044|ref|XP_009128910.1|	1388	0	PREDICTED: acid phosphatase 1 [Brassica rapa]	gi|685258043|ref|XM_009130662.1|	786	0	PREDICTED: Brassica rapa acid phosphatase 1 (LOC103853748), mRNA	P27061	248
BraA01g008390.3C	5.97229	4.81747	6.8872	5.76355	6.1682	5.87089	6.03842	6.548	5.76814	23.9707	21.6849	21.3859	8.85552	8.06926	6.63945	14.3019	13.6614	10.0633	15.9056	16.2159	13.2823	8.94644	6.47747	6.90703	11.2436	10.8103	11.0331	15.004	15.6368	15.746	13.7117	12.052	12.1487	5.41549	5.8831	5.22537	BraA01g008390.3C	protein_coding	chrA01:4059177-4061950:-	gi|685258052|ref|XP_009128940.1|	3412	0	PREDICTED: gamma-glutamyltranspeptidase 3-like [Brassica rapa]	gi|685258051|ref|XM_009130692.1|	1923	0	PREDICTED: Brassica rapa gamma-glutamyltranspeptidase 3-like (LOC103853781), mRNA	Q9M0G0	1001
BraA01g008400.3C	122.059	72.9032	123.354	56.5407	56.171	57.2142	40.8039	47.4093	43.226	101.369	107.792	110.245	59.1432	56.0278	59.7362	79.0401	84.5569	65.2671	59.9312	66.4262	66.4823	38.657	21.2632	22.8975	40.511	36.2827	36.0672	66.8969	61.8871	56.0017	63.1956	65.3881	63.4283	79.9364	85.1769	87.0089	BraA01g008400.3C	protein_coding	chrA01:4079026-4080111:+	gi|685258056|ref|XP_009128959.1|	1706	0	PREDICTED: zinc finger CCCH domain-containing protein 49-like [Brassica rapa]	gi|685258055|ref|XM_009130711.1|	1086	0	PREDICTED: Brassica rapa zinc finger CCCH domain-containing protein 49-like (LOC103853797), mRNA	Q9M0G2	540
BraA01g008410.3C	0.289339	0.56619	0.295337	0.088999	0.219309	0.0906564	1.03322	0.820882	0.653709	1.78977	1.24829	0.391707	1.11996	0.620749	0.854138	0.135676	0.262735	0.125971	0.684709	0.19547	0	0.10286	0.210818	0.439456	0.206835	0.207903	0.199492	0.2851	1.25167	1.23373	0.102862	0.40794	0.0944876	1.19148	0.418345	0.202832	BraA01g008410.3C	protein_coding	chrA01:4083512-4085236:-	gi|674883866|emb|CDY48602.1|	1335	0	BnaA01g07630D [Brassica napus]	gi|685258312|ref|XM_009132118.1|	421	0	PREDICTED: Brassica rapa B3 domain-containing protein At3g06220-like (LOC103855157), partial mRNA	Q9M8K2	239
BraA01g008430.3C	0.162652	0.106095	0.0553414	0.200124	0.554783	0.152888	0.264012	0.173048	0.244989	0.335375	0.64325	0.990896	0.515119	0.407115	0.693558	0.305083	0.369243	0.424888	0.879796	0.219767	0.513223	0.578232	0.888838	0.679363	0.46509	0.350619	0.785013	1.17531	1.80933	1.76054	0.693892	0.745304	0.74363	0.20609	0.235174	0.285055	BraA01g008430.3C	protein_coding	chrA01:4096704-4098320:-	gi|685258060|ref|XP_009128977.1|	2674	0	PREDICTED: MATE efflux family protein 5-like [Brassica rapa]	gi|685258059|ref|XM_009130729.1|	1608	0	PREDICTED: Brassica rapa MATE efflux family protein 5-like (LOC103853816), mRNA	Q9SZE2	917
BraA01g008460.3C	38.8638	18.5704	37.3119	34.2876	32.0836	33.9821	33.2528	34.9372	35.735	110.262	116.87	108.491	43.7836	47.722	47.729	49.3036	49.3794	24.6591	50.8227	11.2959	13.731	25.2761	33.256	31.4585	40.9191	25.6524	32.8195	59.2724	63.8608	60.4755	54.8373	55.9624	56.2757	16.7005	13.6124	22.2812	BraA01g008460.3C	protein_coding	chrA01:4165061-4166357:+	gi|685258070|ref|XP_009129008.1|	1303	4e-179	PREDICTED: auxin-responsive protein IAA27 [Brassica rapa]	gi|923508714|ref|XM_013882835.1|	873	0	PREDICTED: Brassica napus auxin-responsive protein IAA27-like (LOC106441059), mRNA	Q9ZSY8	416
BraA01g008530.3C	44.1784	30.1745	45.5068	24.6915	19.1172	21.1241	11.8093	11.9117	12.6022	24.9607	24.0209	22.7771	21.8467	20.0748	19.0911	14.7836	13.3232	16.4713	20.2097	30.3919	27.718	12.4581	11.4415	10.6358	14.1291	13.113	12.5407	16.9266	16.1114	14.2385	12.1996	11.369	10.85	11.4463	11.659	10.073	BraA01g008530.3C	protein_coding	chrA01:4195261-4199555:+	gi|685258086|ref|XP_009129069.1|	3699	0	PREDICTED: peroxisomal fatty acid beta-oxidation multifunctional protein AIM1 [Brassica rapa]	gi|685258085|ref|XM_009130821.1|	2169	0	PREDICTED: Brassica rapa peroxisomal fatty acid beta-oxidation multifunctional protein AIM1 (LOC103853925), mRNA	Q9ZPI6	1321
BraA01g008570.3C	0.278316	1.77002	0.284086	3.9808	6.64506	3.27011	1.49079	3.40519	2.35802	9.18183	7.80477	6.35825	2.93809	2.23913	3.42333	6.26437	5.4968	2.54461	6.63329	3.52543	2.19546	9.35001	9.42958	13.3155	3.58119	2.69976	3.0223	7.40446	11.6098	10.5437	8.45969	7.06319	6.81661	1.98362	3.62167	2.19493	BraA01g008570.3C	protein_coding	chrA01:4208206-4209431:-	gi|685258094|ref|XP_009129108.1|	1118	1e-153	PREDICTED: rac-like GTP-binding protein ARAC7 [Brassica rapa]	gi|685258093|ref|XM_009130860.1|	630	0	PREDICTED: Brassica rapa rac-like GTP-binding protein ARAC7 (LOC103853965), mRNA	O82480	415
BraA01g008580.3C	4.38451	8.03344	4.91873	9.9813	9.89941	9.3507	11.7427	12.3659	12.219	11.5352	12.3802	11.8015	13.6456	11.3145	11.8443	19.4057	17.1838	12.2368	13.7179	11.1706	10.1367	12.2638	11.3018	10.0126	5.7659	6.35295	6.67345	7.80504	9.81591	8.32342	3.99241	4.37388	4.03207	4.46138	4.64243	5.63256	BraA01g008580.3C	protein_coding	chrA01:4210553-4216203:-	gi|685258096|ref|XP_009129120.1|	6312	0	PREDICTED: DNA topoisomerase 2 [Brassica rapa]	gi|685258095|ref|XM_009130872.1|	4239	0	PREDICTED: Brassica rapa DNA topoisomerase 2 (LOC103853975), mRNA	P30182	1934
BraA01g008590.3C	1.67949	2.46488	1.88574	2.09224	2.38688	2.68374	0.736047	0.714733	0.379452	0.519446	0.815153	1.70528	8.77627	9.36832	9.75059	6.73352	9.03606	4.93566	1.61817	3.31877	3.17963	2.59722	2.01913	1.43486	2.25111	2.17222	2.08435	4.13723	3.97003	3.30523	15.2254	15.7171	15.9603	2.79302	2.45868	3.09056	BraA01g008590.3C	protein_coding	chrA01:4217651-4219994:-	gi|685258098|ref|XP_009129133.1|	1769	0	PREDICTED: bark storage protein A [Brassica rapa]	gi|685258097|ref|XM_009130885.1|	1044	0	PREDICTED: Brassica rapa bark storage protein A (LOC103853983), mRNA	Q07469	151
BraA01g008780.3C	6.81875	3.81235	6.81806	9.88779	13.0528	10.5951	7.65723	6.58831	8.41027	9.75569	12.3075	10.9503	10.724	10.3746	11.6393	0.783046	0.284317	0.999667	8.89143	16.9926	20.125	24.6365	23.65	31.3866	21.3379	27.5226	27.6325	10.6268	10.8358	11.7076	24.7854	28.1056	26.0394	14.3482	10.4123	14.9987	BraA01g008780.3C	protein_coding	chrA01:4312009-4313507:-	gi|685258146|ref|XP_009129331.1|	2231	0	PREDICTED: probable indole-3-pyruvate monooxygenase YUCCA8 [Brassica rapa]	gi|685258145|ref|XM_009131083.1|	1207	0	PREDICTED: Brassica rapa probable indole-3-pyruvate monooxygenase YUCCA8 (LOC103854158), mRNA	Q9SVU0	796
BraA01g008880.3C	5.26976	3.98421	5.01225	6.07856	5.85528	6.86722	6.18199	2.54843	3.7883	5.06247	3.74614	3.52657	4.42519	3.72577	2.4749	4.88601	6.52531	6.57009	12.0253	12.6222	15.3682	12.6455	19.8964	16.9173	8.73283	8.90701	7.67962	5.66461	6.10627	8.60308	17.2442	14.4376	14.6669	6.82884	5.06515	6.80068	BraA01g008880.3C	protein_coding	chrA01:4389035-4390429:-	gi|685258172|ref|XP_009129458.1|	1185	5e-162	PREDICTED: auxin-responsive protein IAA11 [Brassica rapa]	gi|685258171|ref|XM_009131210.1|	726	0	PREDICTED: Brassica rapa auxin-responsive protein IAA11 (LOC103854273), mRNA	Q38829	340
BraA01g008900.3C	3.8228	1.6208	3.64192	4.07636	3.96	3.95265	2.39929	1.67204	2.01529	5.82414	7.37587	6.77105	5.51532	4.92088	4.47222	1.73283	2.60349	2.38557	5.6433	3.7017	4.33347	3.35223	2.32114	2.32247	4.46348	4.57809	4.92003	4.98055	6.02429	6.39475	4.98314	5.07538	4.49421	6.095	3.77696	4.10911	BraA01g008900.3C	protein_coding	chrA01:4393350-4395985:+	gi|685258180|ref|XP_009129498.1|	3027	0	PREDICTED: ABC transporter B family member 23, mitochondrial isoform X1 [Brassica rapa]	gi|685258179|ref|XM_009131250.1|	2064	0	PREDICTED: Brassica rapa ABC transporter B family member 23, mitochondrial (LOC103854311), transcript variant X1, mRNA	Q9FUT3	1033
BraA01g008910.3C	5.50986	2.0472	5.05456	3.47542	3.25117	4.06461	5.43399	2.9681	1.96971	3.52331	4.2126	4.74466	5.96383	4.7134	3.63739	2.55097	1.99497	2.1863	9.12486	8.48123	7.18894	5.72753	6.17435	6.67365	10.6196	14.8841	14.3541	15.1192	15.7107	13.863	10.1907	11.3576	9.83934	14.4487	11.1935	8.58065	BraA01g008910.3C	protein_coding	chrA01:4397049-4398894:+	gi|685258184|ref|XP_009129517.1|	1665	0	PREDICTED: protein PHR1-LIKE 1 [Brassica rapa]	gi|685258183|ref|XM_009131269.1|	1257	0	PREDICTED: Brassica rapa protein PHR1-LIKE 1 (LOC103854324), mRNA	Q94CL7	502
BraA01g008990.3C	2.03208	2.0829	2.27175	5.44692	7.4812	6.27601	2.26176	2.77965	3.27937	8.28018	7.30579	6.38632	2.5538	4.04823	4.09439	5.44502	7.64456	3.66525	2.94418	2.84369	1.01776	2.58002	2.64395	3.08638	2.59399	1.98162	3.50267	4.19531	4.57474	2.85651	3.4057	4.19523	3.79202	1.74716	2.30852	1.11927	BraA01g008990.3C	protein_coding	chrA01:4447690-4449998:-	gi|685258196|ref|XP_009129565.1|	1462	0	PREDICTED: NAC domain-containing protein 8 [Brassica rapa]	gi|685258195|ref|XM_009131317.1|	906	0	PREDICTED: Brassica rapa NAC domain-containing protein 8 (LOC103854379), mRNA	O49459	505
BraA01g009010.3C	0.436167	3.8408	0.890419	1.20746	1.8183	2.04992	2.6903	3.40298	1.97088	0.74945	0.470437	0.738106	1.6883	2.18343	1.43065	1.84074	3.36654	3.03834	0.294907	0.147332	0.611669	1.55058	2.0657	1.98739	1.09128	1.09692	1.654	1.43259	3.90845	3.86268	0.620245	1.07617	0.854619	10.0858	11.5092	9.78435	BraA01g009010.3C	protein_coding	chrA01:4459686-4460369:+	gi|923506190|ref|XP_013696380.1|	1051	9e-144	PREDICTED: uncharacterized protein LOC106400544 [Brassica napus]	gi|685258203|ref|XM_009131347.1|	597	0	PREDICTED: Brassica rapa uncharacterized LOC103854413 (LOC103854413), mRNA	Q5XV67	320
BraA01g009030.3C	214.83	918.44	239.438	32.4329	25.1435	27.8401	186.532	191.167	170.861	376.598	391.861	371.299	160.503	162.246	142.226	86.1086	93.0562	75.8224	18.8242	15.207	9.5532	4.63289	5.17928	5.39818	7.19868	14.4717	18.3789	61.8706	72.117	77.7175	7.16005	10.0221	7.35088	239.052	26.1225	21.5933	BraA01g009030.3C	protein_coding	chrA01:4468528-4468749:-	gi|685258208|ref|XP_009129605.1|	274	6e-30	PREDICTED: uncharacterized protein LOC103854420 [Brassica rapa]	gi|685258207|ref|XM_009131357.1|	222	7e-112	PREDICTED: Brassica rapa uncharacterized LOC103854420 (LOC103854420), mRNA	Q1PE40	87.4
BraA01g009120.3C	76.0679	295.778	82.7839	12.3219	13.1906	12.3456	130.364	123.665	103.241	129.99	127.376	133.357	15.5983	19.9593	19.6015	8.31436	9.39205	11.1505	153.852	144.408	164.848	87.6636	62.6816	70.5672	52.2257	84.5825	85.3489	379.082	375.095	383.191	62.4513	68.1684	69.0545	66.7743	64.5662	78.146	BraA01g009120.3C	protein_coding	chrA01:4545335-4546135:-	gi|674869916|emb|CDY64966.1|	1175	2e-160	BnaA01g34910D [Brassica napus]	gi|685258353|ref|XM_009132407.1|	801	0	PREDICTED: Brassica rapa ethylene-responsive transcription factor 6-like (LOC103855420), mRNA	Q8VZ91	308
BraA01g009270.3C	1.33701	5.60639	1.94961	14.629	16.2869	15.081	9.67285	9.75401	9.27796	11.421	13.3905	14.9329	18.5503	20.079	19.1707	40.0351	33.5606	11.9746	3.48684	3.67751	3.01337	10.5926	8.55879	7.39751	6.1442	4.11729	6.91376	1.12922	1.06234	1.12767	8.35202	11.7143	11.2274	23.5959	17.6054	12.4523	BraA01g009270.3C	protein_coding	chrA01:4625589-4626229:-	gi|685258396|ref|XP_009130866.1|	722	2e-95	PREDICTED: uncharacterized protein LOC103855611 [Brassica rapa]	gi|923506705|ref|XM_013855749.1|	459	0	PREDICTED: Brassica napus uncharacterized LOC106415095 (LOC106415095), mRNA	.	.
BraA01g009380.3C	18.9158	14.8504	18.7299	15.5738	16.2263	15.4379	10.8106	10.3636	10.1084	10.5097	14.4158	11.7307	22.8385	21.0201	25.8581	16.2528	14.6567	24.5584	8.96036	9.06774	9.88806	10.7513	8.17042	9.03184	10.931	7.32494	6.67718	6.47332	5.87992	4.90404	14.9796	14.1332	14.3149	5.3819	7.12403	6.90807	BraA01g009380.3C	protein_coding	chrA01:4698196-4699215:+	gi|923506720|ref|XP_013711837.1|	1257	3e-173	PREDICTED: uncharacterized membrane protein At4g09580-like [Brassica napus]	gi|685258412|ref|XM_009132710.1|	774	0	PREDICTED: Brassica rapa uncharacterized membrane protein At4g09580-like (LOC103855690), mRNA	Q8L586	305
BraA01g009460.3C	0.379522	0.618887	0.12913	1.40087	1.15066	0.713478	0.862439	0	0.14291	0.652119	0.136447	1.15605	0.534198	0.54282	0.871393	3.02541	1.37851	0.330468	5.77366	4.74331	3.99174	11.0635	8.98714	6.34072	3.11998	1.09081	2.09337	4.98617	5.39447	5.97517	4.85724	5.08335	4.83359	2.28416	2.33214	2.92657	BraA01g009460.3C	protein_coding	chrA01:4768793-4769485:-	gi|685258436|ref|XP_009131125.1|	1093	4e-149	PREDICTED: transcription factor MYC4-like [Brassica rapa]	gi|685258435|ref|XM_009132877.1|	693	0	PREDICTED: Brassica rapa transcription factor MYC4-like (LOC103855832), mRNA	O49687	345
BraA01g009560.3C	118.163	87.4991	117.919	42.6597	45.6709	45.9346	85.5243	91.193	89.0449	78.6952	81.2227	79.1911	44.9336	45.4491	43.4706	20.0737	20.3016	14.8081	51.1481	40.9045	42.7637	19.4922	24.515	22.4894	27.7198	29.2324	29.8692	40.0628	42.1293	38.7093	11.7268	10.6967	12.5435	34.1792	34.1803	31.7053	BraA01g009560.3C	protein_coding	chrA01:4833866-4836670:-	gi|923906996|ref|XP_013723453.1|	2832	0	PREDICTED: type I inositol polyphosphate 5-phosphatase 2-like [Brassica napus]	gi|923906995|ref|XM_013867999.1|	1470	0	PREDICTED: Brassica napus type I inositol polyphosphate 5-phosphatase 2-like (LOC106427268), mRNA	Q9FUR2	946
BraA01g009590.3C	2.77765	4.35966	1.77202	7.68951	7.76354	6.14651	3.49416	3.4477	3.39929	3.16194	4.18176	3.64288	4.76494	4.15902	4.38458	10.0129	9.9314	10.2792	4.34301	3.57709	4.44308	7.09737	5.4391	5.86674	2.17176	1.43453	1.61588	7.07048	7.67092	7.28852	4.56709	4.28337	5.95272	2.14466	1.75705	4.25946	BraA01g009590.3C	protein_coding	chrA01:4853705-4856344:-	gi|685258462|ref|XP_009131253.1|	2419	0	PREDICTED: two-component response regulator-like APRR2 [Brassica rapa]	gi|685258463|ref|XM_009133016.1|	1504	0	PREDICTED: Brassica rapa two-component response regulator-like APRR2 (LOC103855959), mRNA	Q6LA43	716
BraA01g009720.3C	3.69056	4.34784	4.15146	0.834022	1.37012	1.34513	0.440111	0.400656	0.340333	1.08709	0.812352	0.764738	3.65747	4.8476	3.26099	2.54288	1.33365	5.01707	3.28464	7.63238	7.36723	3.21306	3.37499	2.74547	1.93827	2.92243	2.49262	1.48428	0.907642	2.14925	1.36558	1.83179	1.99228	8.37413	8.16743	6.96946	BraA01g009720.3C	protein_coding	chrA01:4923665-4924915:+	gi|685258519|ref|XP_009131523.1|	1815	0	PREDICTED: probable purine permease 10 [Brassica rapa]	gi|685258518|ref|XM_009133275.1|	1151	0	PREDICTED: Brassica rapa probable purine permease 10 (LOC103856180), mRNA	O49725	576
BraA01g009770.3C	0	0	0	1.05829	0.386341	1.11792	0.248202	0.271142	0.431847	0.306534	0.687193	0.862554	0.8968	0.683456	1.04491	0.239011	0.289276	0.33287	0.560023	0.172172	0.223375	0.815408	1.0213	1.16124	1.32083	0.228904	0.702861	0.292974	0.905612	1.0031	1.26844	1.25762	0.624195	2.42186	2.48727	2.18855	BraA01g009770.3C	protein_coding	chrA01:4973746-4976774:+	gi|685258524|ref|XP_009131562.1|	3602	0	PREDICTED: potassium channel KAT2-like [Brassica rapa]	gi|685258523|ref|XM_009133314.1|	2064	0	PREDICTED: Brassica rapa potassium channel KAT2-like (LOC103856214), mRNA	Q38849	1161
BraA01g009890.3C	69.0561	144.056	62.128	39.8489	44.2299	42.3406	67.6163	74.0637	67.4965	45.4797	52.3982	47.6261	43.2292	46.7223	50.1856	68.6038	82.1441	47.4075	74.0009	108.835	97.6908	59.7527	58.5886	60.6407	55.8849	66.0038	57.751	31.7296	32.0934	35.7154	38.1154	45.4665	40.1181	16.4501	11.5052	21.5299	BraA01g009890.3C	protein_coding	chrA01:5050289-5052215:-	gi|685258556|ref|XP_009131701.1|	326	2e-36	PREDICTED: uncharacterized protein LOC103856342 [Brassica rapa]	gi|923521182|ref|XM_013813387.1|	239	5e-121	PREDICTED: Brassica napus uncharacterized LOC106373168 (LOC106373168), mRNA	.	.
BraA01g009970.3C	0	0.211405	0.0551368	0.049846	0.184244	0.203097	0	0.0574693	0	0	0	0.0548463	0.0570239	0	0	0	0	0.0705529	0.766975	1.25899	0.965838	1.61306	1.71207	1.84596	0.984663	0.931527	1.62009	2.18225	2.50366	2.60447	0.460884	0.571191	0.42336	3.49058	2.9288	2.21521	BraA01g009970.3C	protein_coding	chrA01:5098170-5101564:-	gi|685258581|ref|XP_009131812.1|	1240	5e-164	PREDICTED: uncharacterized protein LOC103856444 isoform X3 [Brassica rapa]	gi|685258580|ref|XM_009133564.1|	722	0	PREDICTED: Brassica rapa uncharacterized LOC103856444 (LOC103856444), transcript variant X3, mRNA	Q9S7T7	110
BraA01g010020.3C	20.8527	15.6613	18.3621	6.84331	6.76194	5.86647	18.2347	11.6396	10.1193	33.7614	32.7864	32.2812	11.1618	11.2632	10.6209	11.6719	11.7013	9.30252	30.3083	19.5688	23.7087	13.1558	17.0929	15.3898	17.0062	16.9357	17.3896	58.5308	60.0328	59.4617	16.7583	18.0905	17.8396	37.9578	40.1296	31.5783	BraA01g010020.3C	protein_coding	chrA01:5145356-5147450:+	gi|685258599|ref|XP_009131909.1|	2168	0	PREDICTED: uncharacterized protein LOC103856548 isoform X1 [Brassica rapa]	gi|685258598|ref|XM_009133661.1|	1194	0	PREDICTED: Brassica rapa uncharacterized LOC103856548 (LOC103856548), transcript variant X1, mRNA	.	.
BraA01g010040.3C	1.13213	0.692314	1.01115	2.28531	2.01122	2.5274	0.964763	1.27977	1.35886	2.33436	1.67899	1.86796	1.34455	1.59396	0.974779	1.09494	1.25292	0.646934	2.72699	2.29452	2.75362	2.79217	4.02136	2.33747	2.5038	1.75408	1.60994	1.04583	1.11507	1.04439	2.03757	3.21734	3.25811	0.470688	0.537113	0.744043	BraA01g010040.3C	protein_coding	chrA01:5154533-5157244:-	gi|685258607|ref|XP_009131946.1|	2154	0	PREDICTED: phospholipase A1-IIgamma-like [Brassica rapa]	gi|685258606|ref|XM_009133698.1|	1231	0	PREDICTED: Brassica rapa phospholipase A1-IIgamma-like (LOC103856580), mRNA	O49523	707
BraA01g010150.3C	0	0	0	0	0	0	0	0	0	0	0	0	0	0	0.0915796	0	0	0	0	0.094311	0	0	0.101716	0	0	0.10031	0.192503	0.550225	0.690181	0.732624	0	0.196824	0.182355	2.21104	2.22029	0.880767	BraA01g010150.3C	protein_coding	chrA01:5203818-5204759:+	gi|923638769|ref|XP_013640499.1|	1003	8e-133	PREDICTED: uncharacterized protein LOC106345846 isoform X7 [Brassica napus]	gi|923638768|ref|XM_013785045.1|	536	0	PREDICTED: Brassica napus uncharacterized LOC106345846 (LOC106345846), transcript variant X8, mRNA	.	.
BraA01g010170.3C	0	0.0600685	0.062666	3.56912	3.00145	3.11622	1.13603	0.326585	0.624182	1.20258	1.78786	1.43372	3.37016	2.70013	3.74553	10.7957	9.9511	11.146	0.560385	0.435495	0.387433	1.57143	1.20777	2.09803	1.38245	0.595536	1.0159	1.57284	0.853665	1.08739	1.04764	2.14233	1.98484	1.10849	1.3315	2.06581	BraA01g010170.3C	protein_coding	chrA01:5220789-5222334:+	gi|685258627|ref|XP_009132049.1|	2228	0	PREDICTED: uncharacterized protein LOC103856682 [Brassica rapa]	gi|685258626|ref|XM_009133801.1|	1428	0	PREDICTED: Brassica rapa uncharacterized LOC103856682 (LOC103856682), mRNA	.	.
BraA01g010200.3C	0	0.226028	0	0	0.262651	0	0.112492	0.122889	0.521933	0.595413	0.249164	0.70368	0	0	0	0.16249	0.471989	0.150866	2.10864	0.9364	0.485951	0.123189	1.38865	0.789457	0.619278	0	0	2.16248	1.82025	1.59121	0.246382	0	0	0.329296	0.375767	0.607292	BraA01g010200.3C	protein_coding	chrA01:5239122-5240863:+	gi|685258634|ref|XP_009132082.1|	1284	2e-177	PREDICTED: uncharacterized protein LOC103856711 isoform X1 [Brassica rapa]	gi|685258633|ref|XM_009133834.1|	759	0	PREDICTED: Brassica rapa uncharacterized LOC103856711 (LOC103856711), transcript variant X1, mRNA	Q9SN47	365
BraA01g010280.3C	0	0.606739	0.0791221	1.35906	1.58636	1.60296	1.20787	1.0721	0.525395	0.879063	0.668844	1.02317	1.55477	1.16411	2.05945	4.36179	4.54003	2.22738	3.38047	1.33536	0.896818	2.97613	4.15121	3.26707	2.16106	0.919018	0.801672	2.82605	3.0898	2.89843	1.65344	2.54097	2.05041	1.84155	1.84926	2.44528	BraA01g010280.3C	protein_coding	chrA01:5266054-5267699:-	gi|923506325|ref|XP_013700361.1|	1348	0	PREDICTED: receptor-like protein kinase 5 [Brassica napus]	gi|685258647|ref|XM_009133896.1|	1102	0	PREDICTED: Brassica rapa leucine-rich repeat receptor-like protein FASCIATED EAR2 (LOC103856764), mRNA	Q9SN38	457
BraA01g010370.3C	9.84123	15.7296	9.96857	3.81277	2.56236	4.30746	6.65785	7.19327	6.36484	8.5969	9.237	7.24634	6.18585	6.28569	6.57913	5.70677	7.3674	6.18163	3.27619	4.79604	4.34576	2.08312	2.05263	1.71151	2.98049	3.31976	3.03007	2.44277	2.78557	2.36549	2.16328	2.14483	1.91356	7.21036	5.05079	3.87075	BraA01g010370.3C	protein_coding	chrA01:5327748-5329002:-	gi|685258689|ref|XP_009132283.1|	1936	0	PREDICTED: heat stress transcription factor A-4a-like [Brassica rapa]	gi|685258690|ref|XM_009134040.1|	1167	0	PREDICTED: Brassica rapa heat stress transcription factor A-4a-like (LOC103856909), transcript variant X2, mRNA	O49403	572
BraA01g010400.3C	8.8258	4.89336	10.0097	3.61969	5.46322	4.88541	2.96066	3.44295	2.32637	1.6176	2.11539	2.9871	7.76424	8.62592	8.00922	1.93134	1.06857	6.66038	5.27121	9.83809	10.6236	7.00728	5.78759	5.25024	14.3007	10.2525	8.3164	4.44488	2.63624	1.8334	10.3542	11.0955	10.3759	3.26165	2.76487	4.53717	BraA01g010400.3C	protein_coding	chrA01:5352967-5354977:+	gi|685258701|ref|XP_009132304.1|	1562	0	PREDICTED: aquaporin NIP1-2-like [Brassica rapa]	gi|685258700|ref|XM_009134056.1|	894	0	PREDICTED: Brassica rapa aquaporin NIP1-2-like (LOC103856927), mRNA	Q8LFP7	532
BraA01g010450.3C	2.01539	6.40868	2.57147	3.2546	2.00498	2.36801	2.94419	5.62852	2.27671	8.05142	7.6081	7.16217	5.05301	3.78336	7.93268	2.83517	1.71571	3.29044	9.45354	9.95631	6.88919	4.83621	8.81073	7.17431	12.6963	7.05973	9.11901	15.1423	8.87419	11.1551	7.52314	6.12701	8.39148	13.6459	18.0303	14.5698	BraA01g010450.3C	protein_coding	chrA01:5382095-5382442:+	gi|685258727|ref|XP_009132419.1|	521	4e-66	PREDICTED: uncharacterized protein LOC103857015 [Brassica rapa]	gi|685258726|ref|XM_009134171.1|	348	0	PREDICTED: Brassica rapa uncharacterized LOC103857015 (LOC103857015), mRNA	.	.
BraA01g010510.3C	3.83255	2.81239	2.608	5.747	4.08508	4.87836	4.27685	3.56781	4.50988	7.98471	6.28663	6.16137	3.37158	3.25469	2.74989	10.446	9.67921	6.36152	2.10544	1.05185	1.76356	2.81011	1.65803	2.81954	2.22602	2.15145	2.39472	3.38303	2.29448	3.06411	4.08751	4.89695	5.16274	2.04865	0.779254	2.35085	BraA01g010510.3C	protein_coding	chrA01:5420709-5421806:-	gi|685258748|ref|XP_009132513.1|	1837	0	PREDICTED: probable disease resistance protein At4g19060 [Brassica rapa]	gi|685258747|ref|XM_009134265.1|	1098	0	PREDICTED: Brassica rapa probable disease resistance protein At4g19060 (LOC103857108), mRNA	Q84WD3	404
BraA01g010520.3C	199.651	127.453	194.261	327.639	321.749	327.936	207.984	214.739	220.814	275.863	277.013	279.537	435.133	434.958	444.163	282.092	274.856	295.382	113.079	110.866	115.734	210.025	218.045	225.267	263.666	256.171	252.546	102.723	102.859	100.238	255.354	242.635	246.902	257.144	268.756	264.545	BraA01g010520.3C	protein_coding	chrA01:5424348-5426691:-	gi|685258751|ref|XP_009132524.1|	2992	0	PREDICTED: probable methyltransferase PMT21 [Brassica rapa]	gi|685258750|ref|XM_009134276.1|	1803	0	PREDICTED: Brassica rapa probable methyltransferase PMT21 (LOC103857117), mRNA	Q94II3	1103
BraA01g010600.3C	153.176	66.6625	159.2	104.231	95.1962	103.086	62.9968	82.0939	70.4757	140.484	145.909	157.861	169.501	171.533	168.012	157.511	158.994	150.532	95.0751	80.5225	91.0004	78.0918	72.67	72.188	232.199	191.461	196.11	151.417	145.645	142.97	174.747	159.889	175.639	110.146	94.1788	115.838	BraA01g010600.3C	protein_coding	chrA01:5460687-5461755:+	gi|297788769|ref|XP_002862431.1|	166	1e-12	expressed protein [Arabidopsis lyrata subsp. lyrata]	gi|923507403|ref|XM_013874752.1|	534	0	PREDICTED: Brassica napus glycine-rich protein A3-like (LOC106433766), transcript variant X3, mRNA	.	.
BraA01g010700.3C	8.48415	15.2845	9.07242	3.47957	5.20581	5.18998	3.67232	4.87138	3.34687	2.77676	3.1955	1.64084	1.42166	1.30014	3.3129	14.7768	10.4555	6.68399	7.10222	9.41632	11.7563	6.60676	9.27258	9.66449	1.87724	1.16119	1.25349	2.78662	2.99609	1.98771	1.43628	2.56325	3.43029	4.73508	6.86366	5.66433	BraA01g010700.3C	protein_coding	chrA01:5525252-5526447:-	gi|685258806|ref|XP_009132746.1|	1158	2e-159	PREDICTED: uncharacterized protein LOC103857326 [Brassica rapa]	gi|923521254|ref|XM_013813544.1|	651	0	PREDICTED: Brassica napus uncharacterized LOC106373357 (LOC106373357), mRNA	.	.
BraA01g010710.3C	0.227123	0.555555	0.386386	1.013	1.11899	1.06744	4.05525	3.78568	3.7203	1.2098	1.18401	1.38366	0.719299	0.690302	0.85672	2.0768	2.83581	1.5327	0.959784	0.997351	0.836093	2.09931	1.57212	2.02665	1.42065	1.18319	0.939576	0.634089	0.701804	0.633217	2.50307	2.80194	2.41054	0.611529	0.738878	1.03491	BraA01g010710.3C	protein_coding	chrA01:5527128-5532541:-	gi|685258808|ref|XP_009132755.1|	3842	0	PREDICTED: long-chain-alcohol oxidase FAO4A [Brassica rapa]	gi|685258807|ref|XM_009134507.1|	2316	0	PREDICTED: Brassica rapa long-chain-alcohol oxidase FAO4A (LOC103857337), mRNA	O65709	1182
BraA01g010790.3C	3.16755	0.949754	4.58908	6.74167	7.49312	7.92372	2.08976	1.685	1.21199	6.16252	5.84098	5.80987	22.5442	21.5379	21.4664	1.50928	1.60053	2.53571	2.17623	1.50139	2.74048	4.19552	3.85277	2.56068	12.2712	19.8234	18.7573	0.654434	1.9891	1.65897	40.7572	37.9785	37.5891	8.1564	8.42102	8.91785	BraA01g010790.3C	protein_coding	chrA01:5598610-5602528:+	gi|685258822|ref|XP_009132824.1|	2784	0	PREDICTED: uncharacterized protein LOC103857403 [Brassica rapa]	gi|685258821|ref|XM_009134576.1|	1716	0	PREDICTED: Brassica rapa uncharacterized LOC103857403 (LOC103857403), mRNA	F4I9E1	589
BraA01g010990.3C	0.506761	0.413188	0.172422	0	0.288081	0.476339	0.57579	0.269574	0.76329	1.65442	0.819865	1.97241	4.72557	8.06346	6.73189	0	0	0	0.342637	0.59912	0.710668	0.270231	0.830781	0.288631	7.51688	4.46059	4.62954	15.313	16.52	17.4528	8.1071	5.0907	9.0192	0.0802619	0	0	BraA01g010990.3C	protein_coding	chrA01:5702680-5703896:+	gi|685258898|ref|XP_009133165.1|	1613	0	PREDICTED: fe(2+) transport protein 1-like [Brassica rapa]	gi|685258897|ref|XM_009134917.1|	1038	0	PREDICTED: Brassica rapa fe(2+) transport protein 1-like (LOC103857691), mRNA	Q38856	570
BraA01g011000.3C	0.0859506	0	0	0	0	0	0.167415	0.182888	0.19419	0.531668	0.278111	0.17454	0.18147	0.0921995	0.169153	0	0	0	0	0.0870989	0.0904011	0	0	0	0.737305	0.555834	0.71113	2.20198	1.35448	2.11437	0.550011	0.636206	0.673641	0	0	0.0903794	BraA01g011000.3C	protein_coding	chrA01:5706496-5708602:+	gi|685258900|ref|XP_009133175.1|	1753	0	PREDICTED: fe(2+) transport protein 1-like [Brassica rapa]	gi|685258899|ref|XM_009134927.1|	1020	0	PREDICTED: Brassica rapa fe(2+) transport protein 1-like (LOC103857703), mRNA	Q38856	573
BraA01g011030.3C	13.8736	22.72	12.253	17.6146	15.6618	13.8732	17.3446	18.6336	16.1171	4.15907	2.33476	2.19791	11.2182	13.2991	11.1345	19.9321	18.361	28.916	17.1642	33.8014	34.5655	33.1605	34.7349	37.7721	22.2619	22.801	19.3346	8.62884	10.3068	11.1343	26.9697	24.6587	21.4964	20.7578	21.98	33.1087	BraA01g011030.3C	protein_coding	chrA01:5725220-5726247:-	gi|685258906|ref|XP_009133197.1|	1444	0	PREDICTED: E3 ubiquitin-protein ligase BOI [Brassica rapa]	gi|685258905|ref|XM_009134949.1|	891	0	PREDICTED: Brassica rapa E3 ubiquitin-protein ligase BOI (LOC103857722), mRNA	O81851	367
BraA01g011090.3C	1.0077	0.32865	0.685725	2.4797	3.0552	2.68374	1.30853	3.2163	1.51781	1.21204	1.63031	2.04633	1.06379	1.08096	1.65264	0	0.228761	1.31618	3.23635	1.87213	1.76646	8.06035	8.62717	7.84391	4.8624	3.98241	2.25804	3.64076	5.60475	3.80101	8.41875	6.3934	6.91063	5.42644	3.09611	3.70867	BraA01g011090.3C	protein_coding	chrA01:5768274-5768865:+	gi|685258920|ref|XP_009133255.1|	909	5e-123	PREDICTED: protein PHLOEM PROTEIN 2-LIKE A2 [Brassica rapa]	gi|685258919|ref|XM_009135007.1|	522	0	PREDICTED: Brassica rapa protein PHLOEM PROTEIN 2-LIKE A2 (LOC103857779), mRNA	O81866	187
BraA01g011160.3C	1.33189	10.8085	1.11959	0.867561	0.712607	1.32558	0.763016	1.2503	0.619534	0.646174	1.26753	0.318197	6.61661	5.46276	5.16528	11.0214	11.5251	16.8845	0.556211	1.03211	1.40085	0.752011	0.342508	0.267738	0.336037	0.591101	0.729242	0.308795	0.653637	0.0770925	0.417792	0.165691	0.383777	6.62623	4.84265	4.36632	BraA01g011160.3C	protein_coding	chrA01:5819862-5822339:+	gi|685258930|ref|XP_009133320.1|	1849	0	PREDICTED: uncharacterized protein At4g15970 [Brassica rapa]	gi|685258929|ref|XM_009135072.1|	1119	0	PREDICTED: Brassica rapa uncharacterized protein At4g15970 (LOC103857830), mRNA	P0C042	280
BraA01g011190.3C	0.824848	1.72939	1.04241	1.08737	1.56302	1.21838	1.26236	1.21188	1.28677	3.72549	3.09261	3.15064	1.49274	1.68537	1.66197	1.76817	1.87252	1.64168	7.9274	8.43829	9.3779	6.70251	7.55544	8.36694	6.65457	8.467	7.88073	12.8881	14.091	13.2569	7.74993	7.80843	8.2349	26.8001	19.0393	18.6687	BraA01g011190.3C	protein_coding	chrA01:5832945-5835613:+	gi|685258937|ref|XP_009133354.1|	3605	0	PREDICTED: protein FAR1-RELATED SEQUENCE 1 isoform X1 [Brassica rapa]	gi|685258939|ref|XM_009135114.1|	2232	0	PREDICTED: Brassica rapa protein FAR1-RELATED SEQUENCE 1 (LOC103857855), transcript variant X2, mRNA	Q5UBY2	758
BraA01g011220.3C	21.0101	35.3203	22.2255	15.8628	13.2467	14.0038	21.2059	22.5561	23.3028	11.8149	12.5665	8.72701	11.4931	11.0639	13.1563	31.1683	27.3168	24.9471	4.06798	5.03238	8.23655	5.0926	6.47128	6.30964	2.66249	1.85278	2.37043	2.25844	3.36407	3.383	3.66674	2.22167	2.24547	11.798	5.17805	5.22192	BraA01g011220.3C	protein_coding	chrA01:5847140-5848018:+	gi|685258954|ref|XP_009133425.1|	802	2e-107	PREDICTED: glycine-rich RNA-binding protein 4, mitochondrial-like [Brassica rapa]	gi|685258953|ref|XM_009135177.1|	459	0	PREDICTED: Brassica rapa glycine-rich RNA-binding protein 4, mitochondrial-like (LOC103857919), mRNA	Q6YWP9	76.6
BraA01g011250.3C	0.544532	0.380558	0.344079	0.66998	0.501181	0.414349	0.580827	0.689683	0.615136	0.481191	0.53138	0.684532	0.711711	0.611937	0.688919	1.38614	1.09489	0.880565	0.683754	0.867125	0.490909	0.580746	0.651814	0.620288	0.278043	0.726645	0.589979	0.766507	0.86533	0.790967	0.497792	0.438707	0.127018	5.15001	3.45859	2.97201	BraA01g011250.3C	protein_coding	chrA01:5859435-5863694:-	gi|685258962|ref|XP_009133454.1|	5813	0	PREDICTED: uncharacterized protein LOC103857948 isoform X1 [Brassica rapa]	gi|685258961|ref|XM_009135206.1|	3381	0	PREDICTED: Brassica rapa uncharacterized LOC103857948 (LOC103857948), transcript variant X1, mRNA	.	.
BraA01g011270.3C	31.3208	21.6893	29.4884	14.8251	15.3389	16.1318	17.6892	15.5708	15.3483	25.9011	25.0406	29.7202	28.1826	28.7398	27.4894	7.17579	8.96086	19.2402	16.4388	19.3237	20.4074	12.7616	12.0878	13.7934	33.9425	41.3112	40.774	32.6	30.6692	31.8515	30.4046	31.4055	30.2177	21.2923	19.386	17.1441	BraA01g011270.3C	protein_coding	chrA01:5869429-5872599:+	gi|685258969|ref|XP_009133482.1|	2945	0	PREDICTED: vacuolar-sorting receptor 7 [Brassica rapa]	gi|685258968|ref|XM_009135234.1|	1593	0	PREDICTED: Brassica rapa vacuolar-sorting receptor 7 (LOC103857975), mRNA	Q8L7E3	1031
BraA01g011280.3C	2.18535	2.06995	2.96629	2.81037	3.1983	2.95012	3.19247	2.79496	2.62628	3.4514	3.15945	3.75324	4.0986	4.46401	4.43808	0.228933	0.158331	0.516209	5.02221	7.3504	7.65353	7.28958	5.05636	6.32937	11.4174	13.9821	14.4263	7.21596	8.38334	8.4871	9.47168	9.9809	9.06495	5.5011	4.86563	6.11157	BraA01g011280.3C	protein_coding	chrA01:5875968-5879977:+	gi|685258972|ref|XP_009133495.1|	6189	0	PREDICTED: LRR receptor-like serine/threonine-protein kinase GSO1 [Brassica rapa]	gi|685258971|ref|XM_009135247.1|	3771	0	PREDICTED: Brassica rapa LRR receptor-like serine/threonine-protein kinase GSO1 (LOC103857982), mRNA	C0LGQ5	2070
BraA01g011500.3C	80.5766	40.2517	75.9482	50.9226	54.3541	54.4044	54.6414	39.0145	37.7398	34.1498	28.6886	30.392	56.3086	54.6305	50.1834	19.7567	20.5785	53.3626	36.9757	51.3926	62.2934	50.6837	40.6213	45.1661	78.4147	90.7457	85.1673	36.1337	41.818	38.8757	67.3274	66.6781	65.6678	59.8551	45.9192	44.7509	BraA01g011500.3C	protein_coding	chrA01:6003644-6005509:-	gi|685259062|ref|XP_009133895.1|	2198	0	PREDICTED: probable UDP-arabinose 4-epimerase 3 [Brassica rapa]	gi|685259061|ref|XM_009135647.1|	1236	0	PREDICTED: Brassica rapa probable UDP-arabinose 4-epimerase 3 (LOC103858314), mRNA	Q9SUN3	836
BraA01g011630.3C	242.384	463.677	242.724	171.933	186.273	171.967	237.756	198.166	190.723	253.661	243.695	246.223	280.287	275.525	269.78	108.046	112.608	145.392	223.022	276.06	295.631	265.01	213.984	240.235	396.21	552.11	547.499	314.685	312.581	318.254	397.925	418.736	396.434	308.016	324.52	230.192	BraA01g011630.3C	protein_coding	chrA01:6065443-6067381:+	gi|685259092|ref|XP_009134043.1|	2498	0	PREDICTED: cannabidiolic acid synthase [Brassica rapa]	gi|685259091|ref|XM_009135795.1|	1488	0	PREDICTED: Brassica rapa cannabidiolic acid synthase (LOC103858430), mRNA	Q9SUC6	839
BraA01g011650.3C	6.06111	7.48349	6.18676	4.99383	5.25042	4.00164	7.65974	6.21818	5.05373	11.1585	8.94991	9.01145	5.40826	5.41815	6.17721	8.93252	10.0248	10.1784	13.9775	7.09265	7.74101	6.54116	10.0154	8.79482	11.5283	7.62156	7.38785	13.5799	15.6518	12.0702	7.07998	8.77448	8.4122	17.7595	19.0138	16.3129	BraA01g011650.3C	protein_coding	chrA01:6078028-6079242:-	gi|685259099|ref|XP_009134073.1|	1106	1e-145	PREDICTED: uncharacterized protein LOC103858457 [Brassica rapa]	gi|685259098|ref|XM_009135825.1|	1215	0	PREDICTED: Brassica rapa uncharacterized LOC103858457 (LOC103858457), mRNA	.	.
BraA01g011660.3C	33.3979	10.6201	34.3034	28.1224	23.2577	24.5258	12.1974	12.4364	13.9123	84.7885	76.7719	71.6363	50.682	44.3348	44.7772	27.6024	27.8631	17.4487	24.5573	17.1336	13.8314	12.2441	8.66913	10.9377	50.1367	49.2707	45.9822	59.2357	59.5972	65.5214	21.8171	23.6175	23.5173	34.1182	35.3113	36.6553	BraA01g011660.3C	protein_coding	chrA01:6081586-6082005:+	gi|685259102|ref|XP_009134084.1|	724	7e-92	PREDICTED: tubulin beta-9 chain [Brassica rapa]	gi|685259101|ref|XM_009135836.1|	396	0	PREDICTED: Brassica rapa tubulin beta-9 chain (LOC103858467), mRNA	P29517	272
BraA01g011670.3C	31.404	20.4842	36.062	25.3567	35.4569	30.3388	25.2746	25.7544	17.9843	63.8531	61.6272	57.5722	47.6562	51.2327	45.9237	63.1988	59.7066	48.4235	23.0027	19.2268	16.2857	20.4677	18.1146	19.1286	41.8585	32.6725	30.6741	41.9033	45.8906	43.1332	22.0962	15.6813	18.3743	64.0382	35.71	54.8077	BraA01g011670.3C	protein_coding	chrA01:6082126-6082631:+	gi|803378193|emb|CEO92105.1|	575	4e-73	beta-tubulin, partial [Camelina microcarpa]	gi|685259101|ref|XM_009135836.1|	344	2e-179	PREDICTED: Brassica rapa tubulin beta-9 chain (LOC103858467), mRNA	P18025	222
BraA01g011720.3C	0.146116	1.35815	0.149145	1.34833	1.82739	1.30477	0.711513	0.310909	0.412654	0.225959	0.315193	0	1.15687	0.940435	1.15024	2.56937	1.59218	5.91621	1.85238	1.70278	0.845251	0.935001	4.63114	3.74499	2.82019	0.629945	0.453345	0.431927	0.677241	0.718887	2.02587	1.46782	1.93251	8.33118	9.74457	11.8307	BraA01g011720.3C	protein_coding	chrA01:6110349-6115437:+	gi|685259120|ref|XP_009134167.1|	1172	6e-158	PREDICTED: alpha carbonic anhydrase 4-like [Brassica rapa]	gi|685259119|ref|XM_009135919.1|	639	0	PREDICTED: Brassica rapa alpha carbonic anhydrase 4-like (LOC103858538), mRNA	F4JIK2	331
BraA01g011790.3C	0	0	0	0	0	0	0	0	0	0	0	0	0.137723	0	0	0	0	0	1.0585	0.793222	1.09773	1.53051	0.855506	1.48611	1.11912	1.1249	1.61909	0.257099	0.120936	0	1.94796	1.10362	0.89468	1.61169	1.9806	1.23465	BraA01g011790.3C	protein_coding	chrA01:6152075-6152746:+	gi|685259141|ref|XP_009134257.1|	1103	5e-151	PREDICTED: dof zinc finger protein DOF4.4-like isoform X1 [Brassica rapa]	gi|923521372|ref|XM_013813787.1|	672	0	PREDICTED: Brassica napus dof zinc finger protein DOF4.4-like (LOC106373640), mRNA	Q9SUA9	209
BraA01g011870.3C	26.098	109.328	25.4638	35.0618	33.911	32.3133	56.9744	44.6822	38.153	23.9666	23.536	24.7173	28.7084	31.3478	33.5037	29.0006	30.2454	37.3098	0.389244	0.833404	0.115334	0.233896	0.179769	0.187367	1.46977	1.30007	1.41759	2.26903	3.20196	2.15801	0.994079	1.15953	0.966858	1.19836	0.713463	0.40357	BraA01g011870.3C	protein_coding	chrA01:6181562-6183160:-	gi|685259173|ref|XP_009134381.1|	2681	0	PREDICTED: cannabidiolic acid synthase-like [Brassica rapa]	gi|685259172|ref|XM_009136133.1|	1593	0	PREDICTED: Brassica rapa cannabidiolic acid synthase-like (LOC103858724), mRNA	Q9SUC6	824
BraA01g011950.3C	4.22504	5.46876	4.04309	9.38149	9.15698	8.31513	5.4435	5.1506	5.36947	12.5684	12.0571	12.6463	8.96692	8.78117	8.53152	10.2156	11.3299	15.2332	4.90993	5.75325	6.01767	4.74072	4.42527	4.11096	3.68097	5.12305	4.36959	8.02273	7.22118	5.49992	3.19183	3.44384	2.84573	7.31906	5.05889	5.46087	BraA01g011950.3C	protein_coding	chrA01:6217303-6220010:+	gi|685259205|ref|XP_009134514.1|	3232	0	PREDICTED: translocation protein SEC63 homolog [Brassica rapa]	gi|685259206|ref|XM_009136272.1|	1992	0	PREDICTED: Brassica rapa translocation protein SEC63 homolog (LOC103858834), transcript variant X2, mRNA	F4JIN3	1094
BraA01g012050.3C	3.45837	3.55293	4.23607	5.10612	7.66738	4.22598	5.89419	6.62291	4.68814	4.81333	5.59513	7.37407	3.65088	5.93569	4.93446	12.406	10.8343	11.2926	1.40299	0.350457	2.90995	2.58186	1.5119	2.75765	3.3375	1.86374	1.43068	1.36308	2.72499	1.70151	2.39748	4.93692	3.89636	1.31459	0.937563	1.45463	BraA01g012050.3C	protein_coding	chrA01:6270291-6270964:-	gi|685259230|ref|XP_009134632.1|	870	3e-117	PREDICTED: uncharacterized protein LOC103858928 [Brassica rapa]	gi|685259229|ref|XM_009136384.1|	507	0	PREDICTED: Brassica rapa uncharacterized LOC103858928 (LOC103858928), mRNA	.	.
BraA01g012100.3C	11.6991	13.3145	13.0908	10.5699	9.90638	10.5366	13.682	12.9155	12.1653	2.47281	2.90378	2.28627	23.2537	23.5765	23.0722	6.3352	6.06734	21.6739	4.71628	8.58151	9.98804	11.6418	11.1278	11.3193	11.8098	20.8399	20.5537	1.15759	1.58817	0.963333	10.9112	13.3544	11.8451	19.1185	22.7189	14.2578	BraA01g012100.3C	protein_coding	chrA01:6283130-6286812:-	gi|685259241|ref|XP_009134691.1|	2627	0	PREDICTED: receptor-like serine/threonine-protein kinase SD1-8 [Brassica rapa]	gi|685259240|ref|XM_009136443.1|	1463	0	PREDICTED: Brassica rapa receptor-like serine/threonine-protein kinase SD1-8 (LOC103858973), mRNA	O81905	823
BraA01g012190.3C	1.59192	1.55757	1.62493	1.10175	1.48674	1.33604	1.27352	1.75416	1.73411	0.703375	0.245286	0.635001	1.26041	1.21976	0.671346	3.03925	3.09762	2.8961	1.78751	3.284	4.06629	2.91051	2.79621	2.46104	1.88988	2.0222	1.88159	1.06441	1.00137	0.447556	3.03184	2.28454	2.8407	1.99905	2.34281	2.45114	BraA01g012190.3C	protein_coding	chrA01:6334184-6337090:-	gi|685259266|ref|XP_009134813.1|	2611	0	PREDICTED: sugar transport protein 12 [Brassica rapa]	gi|685259265|ref|XM_009136565.1|	1542	0	PREDICTED: Brassica rapa sugar transport protein 12 (LOC103859077), mRNA	O65413	901
BraA01g012240.3C	1.64307	2.52625	1.6372	2.7075	2.046	2.61083	2.97178	2.91347	2.20966	2.29891	2.61606	2.18467	2.23012	2.14021	2.11724	4.34763	4.52928	3.62785	2.3409	2.81468	2.09847	2.00268	2.09505	1.55972	1.51014	1.5601	1.82066	2.04303	1.99455	2.27118	1.00136	1.15829	0.881505	1.97034	1.65448	1.2341	BraA01g012240.3C	protein_coding	chrA01:6354897-6360057:+	gi|685259277|ref|XP_009134863.1|	3804	0	PREDICTED: anaphase-promoting complex subunit 4 [Brassica rapa]	gi|685259276|ref|XM_009136615.1|	2206	0	PREDICTED: Brassica rapa anaphase-promoting complex subunit 4 (LOC103859125), mRNA	O65418	1276
BraA01g012250.3C	0.543493	1.22715	0.384065	0.887316	0.808055	0.589461	1.0179	0.800624	0.944558	1.03443	1.35276	1.40082	1.10336	1.21086	1.23416	2.05844	2.56252	1.58355	0.636011	0.550754	0.439719	0.53505	1.00523	0.952469	0.717263	0.540725	0.6918	1.02987	1.93774	1.48097	0.535061	0.707329	0.409582	1.2316	1.08806	1.40676	BraA01g012250.3C	protein_coding	chrA01:6360742-6366013:+	gi|685259281|ref|XP_009134879.1|	3446	0	PREDICTED: B3 domain-containing transcription factor VAL3 isoform X2 [Brassica rapa]	gi|923508364|ref|XM_013881625.1|	1460	0	PREDICTED: Brassica napus B3 domain-containing transcription factor VAL3 (LOC106440033), transcript variant X2, mRNA	O65420	742
BraA01g012320.3C	0	0	0	0	0	0	0	0	0	0	0	0	0	0	0	0	0	0	16.6837	13.0418	10.4829	7.22407	5.71093	6.28298	8.40454	6.46632	6.00457	11.4418	10.2259	12.4734	5.67616	5.52542	5.30883	1.6552	1.46906	2.84904	BraA01g012320.3C	protein_coding	chrA01:6389673-6391567:+	gi|685259303|ref|XP_009134988.1|	1631	0	PREDICTED: endonuclease 5 [Brassica rapa]	gi|685259302|ref|XM_009136740.1|	903	0	PREDICTED: Brassica rapa endonuclease 5 (LOC103859233), mRNA	F4JJL3	530
BraA01g012370.3C	222.326	34.7615	214.626	68.802	65.5404	67.8726	67.4475	75.0121	75.2386	42.7156	41.9357	42.2722	38.6681	41.2246	41.3613	99.1847	98.8976	28.9536	32.0234	17.7986	23.4207	8.59219	13.7272	13.3383	23.3406	19.9015	20.6489	11.4885	12.3388	10.8325	17.8785	15.9269	16.2758	5.56363	5.26352	7.10345	BraA01g012370.3C	protein_coding	chrA01:6414144-6416171:-	gi|685259313|ref|XP_009135044.1|	2975	0	PREDICTED: protein NRT1/ PTR FAMILY 7.2-like [Brassica rapa]	gi|893670253|gb|KT119584.1|	1752	0	Brassica juncea cultivar Varuna nitrate transporter 1.8 (NRT1.8) mRNA, complete cds	Q8GXN2	1043
BraA01g012570.3C	19.5522	8.63949	18.67	78.378	83.8999	88.7305	12.6946	16.9993	18.9999	89.9501	87.755	104.172	25.3014	33.152	36.2036	89.6137	90.777	29.382	120.258	54.3272	58.377	78.2531	108.454	108.727	52.0754	24.0195	24.1349	58.4189	63.7288	58.5454	81.1695	83.8118	85.0654	9.98943	15.5028	24.9811	BraA01g012570.3C	protein_coding	chrA01:6552240-6552797:-	gi|685259374|ref|XP_009135325.1|	715	9e-95	PREDICTED: 15.4 kDa class V heat shock protein [Brassica rapa]	gi|685259373|ref|XM_009137077.1|	417	0	PREDICTED: Brassica rapa 15.4 kDa class V heat shock protein (LOC103859533), mRNA	O49710	204
BraA01g012580.3C	2.67823	2.15605	1.48799	6.53833	5.74312	6.21396	4.62236	4.18393	4.71057	5.17277	4.35127	5.16331	3.8294	4.00031	4.20331	10.8736	10.0204	5.84492	2.23489	1.92386	2.06811	3.03713	3.89047	4.59555	3.01722	3.10588	3.47109	3.10667	2.23128	2.7688	1.01239	0.932062	0.929969	2.67397	2.90427	3.13707	BraA01g012580.3C	protein_coding	chrA01:6553704-6558334:+	gi|685259382|ref|XP_009135359.1|	4407	0	PREDICTED: pentatricopeptide repeat-containing protein At4g21880, mitochondrial isoform X1 [Brassica rapa]	gi|685259381|ref|XM_009137111.1|	2349	0	PREDICTED: Brassica rapa pentatricopeptide repeat-containing protein At4g21880, mitochondrial (LOC103859553), transcript variant X1, mRNA	O49711	1170
BraA01g012640.3C	0.247654	0	0.505577	9.36978	6.19455	6.51804	2.6531	1.84438	0.839295	1.02128	1.06845	0.754369	10.4576	5.84451	6.57976	11.8452	14.1677	31.3763	1.50702	0.250963	1.56287	1.0565	5.41337	5.92428	1.85888	1.0677	0.256127	1.22013	0.229573	0	1.84891	2.61877	1.69838	0.706033	2.68556	2.08332	BraA01g012640.3C	protein_coding	chrA01:6580993-6581346:+	gi|685259399|ref|XP_009135433.1|	607	5e-79	PREDICTED: uncharacterized protein LOC103859612 [Brassica rapa]	gi|685259398|ref|XM_009137185.1|	354	0	PREDICTED: Brassica rapa uncharacterized LOC103859612 (LOC103859612), mRNA	.	.
BraA01g012660.3C	0	0	0.171431	0	0	0	0	0	0	0	0	0	0	0	0	0	0	0	1.70334	1.19135	1.23652	1.61207	1.65201	2.29578	0.180089	0.181019	0.694782	2.15136	2.80237	3.13997	0.71649	0.355189	0.329078	1.11721	1.82124	0.883017	BraA01g012660.3C	protein_coding	chrA01:6596825-6597346:+	gi|685259405|ref|XP_009135451.1|	731	5e-96	PREDICTED: uncharacterized protein LOC103859632 [Brassica rapa]	gi|685259404|ref|XM_009137203.1|	522	0	PREDICTED: Brassica rapa uncharacterized LOC103859632 (LOC103859632), mRNA	.	.
BraA01g012670.3C	3.15651	1.1457	2.18261	1.64431	1.09979	1.24424	0.743741	0.704149	1.15025	1.20721	2.08664	1.29233	1.93484	2.02068	2.1041	0.57296	1.10953	1.59592	0.619612	0.877059	0.642572	0.651568	0.945926	0.695933	1.36478	1.26209	1.00041	2.00663	1.98217	1.553	0.814476	0.646023	0.947675	1.83847	1.71146	2.24846	BraA01g012670.3C	protein_coding	chrA01:6598184-6600578:+	gi|685259407|ref|XP_009135461.1|	2861	0	PREDICTED: calcium-dependent protein kinase 15 [Brassica rapa]	gi|685259406|ref|XM_009137213.1|	1722	0	PREDICTED: Brassica rapa calcium-dependent protein kinase 15 (LOC103859640), mRNA	O49717	933
BraA01g012680.3C	430.426	328.643	430.454	591.643	600.958	615.651	590.641	643.731	662.931	4340.68	4392.95	4255.14	1244.78	1246.08	1294.8	2277.51	2316.45	1570.8	542.056	284.362	294.958	343.866	360.756	371.19	498.064	395.898	401.365	1095.86	1120.79	1066.12	941.121	925.461	973.412	178.334	193.86	255.18	BraA01g012680.3C	protein_coding	chrA01:6606556-6608294:-	gi|685259409|ref|XP_009135472.1|	1780	0	PREDICTED: peroxidase 42 [Brassica rapa]	gi|685259408|ref|XM_009137224.1|	996	0	PREDICTED: Brassica rapa peroxidase 42 (LOC103859651), mRNA	Q9SB81	666
BraA01g012700.3C	98.1999	57.429	94.2572	198.714	207.428	204.933	361.976	384.161	373.271	530.225	538.583	522.769	309.289	318.425	307.425	153.658	164.819	250.337	114.634	144.469	157.417	195.706	148.322	151.255	322.441	524.439	524.553	207.337	199.1	203.128	240.301	246.882	241.552	255.087	261.085	249.37	BraA01g012700.3C	protein_coding	chrA01:6618089-6619655:-	gi|685259415|ref|XP_009135496.1|	2124	0	PREDICTED: 5'-adenylylsulfate reductase 3, chloroplastic [Brassica rapa]	gi|685259414|ref|XM_009137248.1|	1407	0	PREDICTED: Brassica rapa 5'-adenylylsulfate reductase 3, chloroplastic (LOC103859677), mRNA	P92980	761
BraA01g012720.3C	4.63689	10.8145	4.0726	33.5342	30.2216	33.5506	16.1206	19.2741	21.5006	60.756	57.5721	62.6284	44.2827	45.0553	45.1501	36.1798	39.6575	44.4367	21.4357	16.5552	15.0279	19.7236	13.907	14.8633	11.7942	11.8551	14.1078	32.1421	27.9893	29.8696	11.5584	11.3457	11.1984	3.58661	2.57259	4.81912	BraA01g012720.3C	protein_coding	chrA01:6634227-6637770:+	gi|923741732|ref|XP_013671465.1|	2856	0	PREDICTED: L-ascorbate oxidase homolog isoform X1 [Brassica napus]	gi|685259422|ref|XM_009137281.1|	1617	0	PREDICTED: Brassica rapa L-ascorbate oxidase homolog (LOC103859705), mRNA	Q00624	541
BraA01g012750.3C	20.8737	9.53086	17.7554	14.6605	20.3044	20.0567	3.38815	4.1948	4.97804	5.02131	4.7529	4.12109	2.32599	3.48309	2.73866	0.326269	0.157954	0	5.76297	17.8622	19.1493	6.92593	6.84405	5.41603	4.84953	6.37444	5.8767	2.17106	2.68746	1.59753	2.96831	3.55612	1.59054	0.881607	0.50301	1.09746	BraA01g012750.3C	protein_coding	chrA01:6679446-6680767:-	gi|923696527|ref|XP_013658326.1|	1200	1e-164	PREDICTED: alcohol dehydrogenase-like 5 [Brassica napus]	gi|685259431|ref|XM_009137328.1|	736	0	PREDICTED: Brassica rapa alcohol dehydrogenase-like 5 (LOC103859746), mRNA	Q0V7W6	401
BraA01g012840.3C	0	0.762469	0.596581	1.07867	0.664506	0.549378	1.13842	1.65818	0.880328	1.60682	1.4709	1.97812	1.851	1.67189	0.958533	0.548132	0.796088	0.508921	1.18552	1.77682	1.43436	0.623334	1.91633	2.88503	1.04451	1.67985	2.61933	2.11164	1.26418	4.21747	1.24669	0.412019	0.954325	8.8866	11.8308	6.55552	BraA01g012840.3C	protein_coding	chrA01:6722006-6723083:-	gi|674954657|emb|CDX79130.1|	419	1e-47	BnaA01g11970D [Brassica napus]	gi|923543173|ref|XM_013878560.1|	161	1e-77	PREDICTED: Brassica napus uncharacterized protein At4g22160 (LOC106437641), transcript variant X1, mRNA	.	.
BraA01g012970.3C	3.15926	3.34868	2.82166	27.4526	27.0891	26.1697	6.79462	6.02211	8.92224	10.5176	12.1392	9.82379	14.2438	15.3915	15.9971	41.6655	42.8525	30.2602	6.742	3.06808	2.97672	13.5477	13.5237	15.5198	8.96307	6.17176	5.6498	7.00422	8.35873	5.95834	16.7068	18.4434	17.1521	7.25539	7.20868	11.2119	BraA01g012970.3C	protein_coding	chrA01:6803840-6805643:-	gi|685259477|ref|XP_009135776.1|	1898	0	PREDICTED: uncharacterized membrane protein At1g16860 [Brassica rapa]	gi|685259476|ref|XM_009137528.1|	1332	0	PREDICTED: Brassica rapa uncharacterized membrane protein At1g16860 (LOC103859930), mRNA	Q9FZ45	311
BraA01g013010.3C	2.90778	10.5266	5.04571	13.0138	13.7199	13.9394	14.0179	14.6947	17.7379	8.84351	12.3882	10.6287	16.883	14.6602	17.5969	26.1794	26.5363	23.1673	2.35925	2.65197	1.98793	5.73715	3.4958	6.45902	7.32719	5.798	5.7138	1.57585	2.69548	3.14737	6.20245	5.38085	5.12772	14.7834	6.46406	7.49114	BraA01g013010.3C	protein_coding	chrA01:6819518-6820710:-	gi|685259483|ref|XP_009135796.1|	582	9e-73	PREDICTED: uncharacterized protein LOC103859949 [Brassica rapa]	gi|685259482|ref|XM_009137548.1|	603	0	PREDICTED: Brassica rapa uncharacterized LOC103859949 (LOC103859949), mRNA	.	.
BraA01g013020.3C	64.6107	88.1232	67.9309	85.851	93.1867	88.6301	111.507	98.2521	99.9395	35.6592	36.5673	32.1059	76.6428	76.9002	83.7967	130.877	132.474	127.032	103.965	118.339	126.307	145.12	205.482	199.863	181.525	148.997	155.956	67.601	74.0732	68.8559	178.116	171.406	179.719	163.803	171.941	184.494	BraA01g013020.3C	protein_coding	chrA01:6824937-6825776:+	gi|923743781|ref|XP_013672060.1|	1293	9e-179	PREDICTED: alkaline ceramidase 3-like [Brassica napus]	gi|685259480|ref|XM_009137541.1|	744	0	PREDICTED: Brassica rapa alkaline ceramidase 3-like (LOC103859941), transcript variant X2, mRNA	Q94IB9	481
BraA01g013050.3C	0.649404	1.50905	1.07716	1.27343	1.01522	0.839327	1.18585	0.777272	0.825307	2.59435	1.48841	1.31875	1.02833	0.696619	0.559144	3.54002	3.20647	1.37833	7.16254	3.45492	6.48879	3.03009	2.12926	2.12678	3.6558	2.79976	3.60997	7.27876	5.94467	5.67122	3.89591	4.54938	5.08973	7.7912	4.31331	5.20686	BraA01g013050.3C	protein_coding	chrA01:6833477-6835069:+	gi|685259503|ref|XP_009135888.1|	1400	0	PREDICTED: uncharacterized protein LOC103860027 [Brassica rapa]	gi|685259502|ref|XM_009137640.1|	1080	0	PREDICTED: Brassica rapa uncharacterized LOC103860027 (LOC103860027), mRNA	O74503	78.6
BraA01g013110.3C	12.6488	24.1117	10.9076	64.3981	61.4916	61.7025	63.0804	46.6363	53.9529	182.791	177.825	182.903	217.101	203.527	207.515	90.1964	77.8265	100.835	57.0644	50.1664	49.7746	36.051	39.5661	50.9269	18.9416	17.8641	19.848	72.2027	72.1716	69.099	24.6547	23.2914	19.4426	1.24346	1.89192	2.06389	BraA01g013110.3C	protein_coding	chrA01:6853241-6853642:-	gi|685259514|ref|XP_009135928.1|	365	6e-42	PREDICTED: putative lipid-binding protein AIR1 [Brassica rapa]	gi|685259513|ref|XM_009137680.1|	402	0	PREDICTED: Brassica rapa putative lipid-binding protein AIR1 (LOC103860068), mRNA	Q9S7I2	92.8
BraA01g013160.3C	125.481	106.622	133.206	162.727	165.366	167.644	147.951	152.962	153.469	40.7071	39.6998	39.8645	109.034	106.248	107.78	112.974	115.615	162.437	204.526	345.304	349.949	340.098	300.494	305.444	312.398	343.104	329.454	109.465	118.078	123.253	294.662	301.702	309.245	181.781	195.581	204.547	BraA01g013160.3C	protein_coding	chrA01:6875565-6876418:-	gi|685259526|ref|XP_009135961.1|	1324	0	PREDICTED: putative methyltransferase DDB_G0268948 [Brassica rapa]	gi|685259527|ref|XR_631334.1|	786	0	PREDICTED: Brassica rapa putative methyltransferase DDB_G0268948 (LOC103860110), transcript variant X2, misc_RNA	Q55EX9	87.8
BraA01g013230.3C	31.2198	30.7237	34.8314	7.70477	6.60379	6.82457	26.1624	22.9802	24.1953	48.8408	43.6571	49.2073	24.1434	29.2061	21.9689	11.4903	10.3838	7.82348	14.5429	10.6683	8.2091	5.61388	3.96756	3.51497	9.14761	9.78176	7.3211	33.2664	29.4452	22.8615	17.0355	15.5467	19.0272	12.9366	10.8257	12.2152	BraA01g013230.3C	protein_coding	chrA01:6925727-6926209:+	gi|685259544|ref|XP_009136028.1|	835	2e-112	PREDICTED: indole-3-acetic acid-induced protein ARG7 [Brassica rapa]	gi|923737117|ref|XM_013814646.1|	483	0	PREDICTED: Brassica napus auxin-responsive protein SAUR36-like (LOC106374674), mRNA	O22150	106
BraA01g013240.3C	71.1793	23.691	82.8821	33.7084	34.4119	30.6082	17.2796	16.6558	19.1	64.9901	60.3369	66.7616	187.303	192.565	179.725	19.674	18.1963	32.1711	23.7105	26.8638	23.2718	24.0429	11.4067	10.2244	31.3354	47.2459	52.0268	58.6186	55.3402	54.6354	90.1625	81.6681	88.7522	24.7952	26.0308	24.5832	BraA01g013240.3C	protein_coding	chrA01:6935073-6935906:+	gi|923737126|ref|XP_013670102.1|	636	1e-82	PREDICTED: uncharacterized protein LOC106374676 isoform X2 [Brassica napus]	gi|923737125|ref|XM_013814648.1|	420	0	PREDICTED: Brassica napus uncharacterized LOC106374676 (LOC106374676), transcript variant X2, mRNA	.	.
BraA01g013300.3C	6.41381	3.15848	6.41671	11.3276	10.238	11.3389	10.2177	9.85147	9.69256	7.92608	9.80395	7.97862	6.68116	7.92809	8.44289	7.70811	7.98402	11.484	4.52326	3.61562	4.15477	11.4157	13.0912	14.3219	12.0241	11.9488	12.6076	5.48279	5.66992	5.68422	7.33881	7.59062	7.78163	20.3032	20.5891	15.4092	BraA01g013300.3C	protein_coding	chrA01:6966424-6968842:+	gi|685259566|ref|XP_009136073.1|	3637	0	PREDICTED: somatic embryogenesis receptor kinase 4 [Brassica rapa]	gi|685259565|ref|XM_009137825.1|	2064	0	PREDICTED: Brassica rapa somatic embryogenesis receptor kinase 4 (LOC103860236), mRNA	Q8RY65	229
BraA01g013400.3C	8.02205	11.3062	6.92111	3.34881	3.14881	3.86001	5.58049	4.57219	5.07051	2.36297	2.4721	2.6181	2.92369	2.86843	3.571	6.71731	4.16255	8.23255	44.3603	61.1628	71.3164	34.1204	42.8983	48.5189	26.6249	22.2334	21.4327	10.163	8.23312	10.055	32.084	30.9014	30.7817	17.5155	18.4338	23.2978	BraA01g013400.3C	protein_coding	chrA01:7020196-7021655:-	gi|685259588|ref|XP_009136168.1|	1348	0	PREDICTED: uncharacterized protein LOC103860329 [Brassica rapa]	gi|685259587|ref|XM_009137920.1|	918	0	PREDICTED: Brassica rapa uncharacterized LOC103860329 (LOC103860329), mRNA	O49658	394
BraA01g013410.3C	25.0916	20.8529	24.0689	8.83392	8.8219	8.52483	27.3319	21.0668	21.8564	10.285	11.0317	11.5618	5.85085	5.5129	5.85035	2.40989	3.43141	4.14596	7.00073	8.06716	7.57811	5.48104	5.0111	6.42818	4.91642	3.31264	3.54339	6.1562	6.21193	5.89983	2.79431	2.87703	2.81361	10.6294	10.8182	8.10609	BraA01g013410.3C	protein_coding	chrA01:7027546-7031675:-	gi|674891513|emb|CDY41290.1|	2685	0	BnaA01g12490D [Brassica napus]	gi|685259591|ref|XM_009137942.1|	1162	0	PREDICTED: Brassica rapa uncharacterized LOC103860350 (LOC103860350), mRNA	Q8LJW1	693
BraA01g013470.3C	0	0	0.0830892	0.375581	0.185099	0.30606	0.0792772	0.0866042	0.275869	0.50353	0.877974	0.743862	0.257799	0	0.1602	0	0	0	3.13718	2.22721	1.5411	0.694522	0.444831	1.20544	1.48385	1.66699	2.18885	11.6303	11.6961	11.6143	3.03859	3.09875	1.75447	1.70182	1.5889	1.88311	BraA01g013470.3C	protein_coding	chrA01:7066463-7067884:-	gi|685259610|ref|XP_009136276.1|	1813	0	PREDICTED: leucoanthocyanidin dioxygenase [Brassica rapa]	gi|685259609|ref|XM_009138028.1|	1077	0	PREDICTED: Brassica rapa leucoanthocyanidin dioxygenase (LOC103860424), mRNA	Q96323	649
BraA01g013480.3C	1.27851	1.51898	1.49145	0.758438	0.830633	0.772563	2.13454	0.582954	0.206327	1.22395	0.689484	0.649072	0.771248	0.685734	0.7189	1.15622	0.746333	0.715671	13.2445	7.40341	7.78015	2.14271	4.19198	2.80874	6.16917	6.10259	4.72235	22.6762	21.0791	18.5113	2.72714	4.05581	4.29446	5.03342	4.95151	4.32126	BraA01g013480.3C	protein_coding	chrA01:7069615-7071238:+	gi|685259612|ref|XP_009136287.1|	1582	0	PREDICTED: PGR5-like protein 1A, chloroplastic isoform X1 [Brassica rapa]	gi|923508639|ref|XM_013882522.1|	960	0	PREDICTED: Brassica napus PGR5-like protein 1A, chloroplastic (LOC106440784), mRNA	Q8H112	556
BraA01g013520.3C	0.389643	0.338875	0.39772	0.0399507	0.196891	0.0406947	0.0843274	0.0921212	0.0978142	0.178536	0.420257	0.219791	0.0914072	0	0.127804	0.304518	0.0589695	0.395828	0.570808	0.307104	0.910708	0.415556	0.236584	0.14795	0.139269	0.373301	0.0447748	1.74904	2.04677	1.36322	0.36939	0.915598	0.76346	0.74055	1.03285	1.32021	BraA01g013520.3C	protein_coding	chrA01:7085318-7090383:+	gi|923508619|ref|XP_013737896.1|	1820	0	PREDICTED: cysteine-rich receptor-like protein kinase 11 isoform X1 [Brassica napus]	gi|923733029|ref|XM_013813284.1|	836	0	PREDICTED: Brassica napus cysteine-rich receptor-like protein kinase 11 (LOC106373054), mRNA	Q9ZP16	476
BraA01g013530.3C	0	0	0	0	0	0	0	0	0	0	0	0	0	0	0	0	0	0	0.652039	0.710727	0.491782	0.997334	0.5749	0.532621	0.501367	0.314973	0.423122	2.53397	2.92568	2.12791	1.05969	0.679832	0.687114	5.22088	4.56331	4.17914	BraA01g013530.3C	protein_coding	chrA01:7097365-7099956:+	gi|923508632|ref|XP_013737929.1|	1805	0	PREDICTED: cysteine-rich receptor-like protein kinase 11 isoform X2 [Brassica napus]	gi|923508628|ref|XM_013882468.1|	886	0	PREDICTED: Brassica napus cysteine-rich receptor-like protein kinase 11 (LOC106440729), transcript variant X1, mRNA	Q9ZP16	382
BraA01g013540.3C	5.16653	1.26376	5.10884	0.446962	1.46852	0.607047	1.72964	2.23305	2.18866	13.8155	14.1053	13.9343	1.36353	2.94427	3.4952	3.86115	2.19914	1.89791	0.982479	0.818056	0.849071	0.172192	0.352916	0.183916	0.346248	0.696072	0.667912	1.90907	2.84366	3.01853	0.172195	0.682905	0.158175	1.074	0.525243	0.848867	BraA01g013540.3C	protein_coding	chrA01:7104899-7105557:+	gi|923508616|ref|XP_013737886.1|	816	2e-103	PREDICTED: cysteine-rich receptor-like protein kinase 11 isoform X3 [Brassica napus]	gi|685259633|ref|XM_009138141.1|	454	0	PREDICTED: Brassica rapa cysteine-rich receptor-like protein kinase 11 (LOC103860512), transcript variant X3, mRNA	Q9ZP16	239
BraA01g013670.3C	9.46667	7.42142	10.2031	21.0525	20.0555	21.2787	21.9323	17.0155	16.6058	12.0633	15.284	13.3732	10.304	11.8579	11.109	8.35433	9.0501	6.98871	10.3167	11.5594	12.4925	18.0604	18.058	19.558	20.554	19.3293	18.9122	7.47398	5.77767	6.24868	25.2098	23.7512	20.9683	24.9209	14.2189	16.5083	BraA01g013670.3C	protein_coding	chrA01:7241454-7244429:+	gi|685259682|ref|XP_009136658.1|	1818	0	PREDICTED: protein IQ-DOMAIN 14-like [Brassica rapa]	gi|685259681|ref|XM_009138410.1|	1491	0	PREDICTED: Brassica rapa protein IQ-DOMAIN 14-like (LOC103860743), mRNA	.	.
BraA01g013690.3C	0.125962	0	0	0	0	0	0.245349	0	0	0.779169	1.35859	1.15106	0.664869	0.40536	0.743689	0.354396	0.171571	0	7.28178	0.51058	0.397453	5.37357	2.47802	3.87413	0.540266	0.135764	0	16.2593	11.9101	20.699	1.88079	2.13113	3.20851	5.26684	4.91736	42.7822	BraA01g013690.3C	protein_coding	chrA01:7252533-7253551:+	gi|685259686|ref|XP_009136680.1|	1231	4e-170	PREDICTED: thaumatin-like protein 1 [Brassica rapa]	gi|685259685|ref|XM_009138432.1|	696	0	PREDICTED: Brassica rapa thaumatin-like protein 1 (LOC103860762), mRNA	P13046	299
BraA01g013740.3C	0.153806	0.300975	0.156995	1.4193	0.961786	0.506006	1.72261	1.39091	1.73749	4.83632	5.97207	4.13844	2.92262	2.30984	2.79992	20.6631	18.5405	21.7966	2.72983	0.857237	0.808852	2.13246	2.01719	1.57684	3.38093	3.06684	3.65858	7.27455	9.69523	9.08068	7.29971	5.44841	8.51358	11.1082	10.8412	12.6151	BraA01g013740.3C	protein_coding	chrA01:7276150-7278477:-	gi|685259706|ref|XP_009136761.1|	1563	0	PREDICTED: cysteine-rich receptor-like protein kinase 10 isoform X3 [Brassica rapa]	gi|685259705|ref|XM_009138513.1|	922	0	PREDICTED: Brassica rapa cysteine-rich receptor-like protein kinase 10 (LOC103860828), transcript variant X3, mRNA	Q8GYA4	335
BraA01g013820.3C	4.56448	17.556	4.65911	4.4541	4.11588	4.685	15.6865	15.4617	14.9948	4.6517	3.96113	3.67569	5.37243	4.55866	5.16265	1.03328	0.857546	2.53547	3.35225	3.61531	3.3661	7.77768	7.569	8.30726	4.5006	4.86313	3.74396	3.72217	3.30717	3.87192	2.74183	3.27322	2.313	7.92734	5.97381	7.33744	BraA01g013820.3C	protein_coding	chrA01:7300471-7303395:+	gi|674891467|emb|CDY41244.1|	1673	0	BnaA01g12950D [Brassica napus]	gi|923695684|ref|XM_013802582.1|	643	0	PREDICTED: Brassica napus putative cysteine-rich receptor-like protein kinase 9 (LOC106362727), mRNA	Q9C5S8	348
BraA01g013890.3C	0	0	0.0316993	0	0.0353085	0.0291912	0.0604899	0.0991208	0.0350821	0.320169	0.301459	0.0630645	0.39341	0.166567	0.152795	0.131062	0.211501	0.446185	1.29135	0.629408	0.587944	1.49044	1.83284	1.94568	0.666003	0.903747	0.899303	1.16282	0.719703	0.825078	0.960522	0.952329	1.06487	2.33143	2.22265	1.992	BraA01g013890.3C	protein_coding	chrA01:7343915-7348192:+	gi|674866178|emb|CDY67333.1|	1780	0	BnaAnng24050D, partial [Brassica napus]	gi|923508731|ref|XM_013882904.1|	1276	0	PREDICTED: Brassica napus putative cysteine-rich receptor-like protein kinase 23 (LOC106441111), mRNA	O65482	405
BraA01g013980.3C	0	0	0	0.190577	0.58702	0.388253	0	0	0.116651	0.532295	0.222751	0.41939	0.10901	0.332309	0.304834	0.726324	0.140652	0.134873	0.104728	0.104642	0.108609	2.42285	2.37002	1.6468	1.43944	1.66947	1.06795	0.610497	2.10591	0.914486	1.32158	1.52869	1.92214	1.27568	1.34373	0.977247	BraA01g013980.3C	protein_coding	chrA01:7376860-7378086:+	gi|685259743|ref|XP_009136959.1|	1358	0	PREDICTED: tetraspanin-5 isoform X1 [Brassica rapa]	gi|685259742|ref|XM_009138711.1|	849	0	PREDICTED: Brassica rapa tetraspanin-5 (LOC103861012), transcript variant X1, mRNA	Q84WF6	469
BraA01g014010.3C	30.2082	35.4998	30.4993	26.5122	25.0123	24.3825	24.3033	26.2002	21.8846	12.3558	9.20787	9.00157	21.3176	19.5484	24.071	10.6239	7.60309	13.9382	4.49567	5.65654	6.5617	3.32678	5.0241	5.23644	4.92917	3.89292	6.79169	2.58832	1.3697	2.58476	5.25292	4.51369	4.6644	15.4455	7.2993	5.17904	BraA01g014010.3C	protein_coding	chrA01:7395860-7396576:-	gi|685259751|ref|XP_009137005.1|	809	6e-108	PREDICTED: RING-H2 finger protein ATL81 [Brassica rapa]	gi|923508788|ref|XM_013883054.1|	468	0	PREDICTED: Brassica napus RING-H2 finger protein ATL81 (LOC106441224), mRNA	Q93ZF6	193
BraA01g014090.3C	2.12963	3.53066	2.47569	5.13132	6.92755	6.06095	6.39497	6.7972	8.35331	16.5886	13.7817	17.1784	11.0535	10.9781	12.8063	13.3982	10.7166	9.88997	8.63945	6.23445	8.08852	6.30905	7.62913	7.07555	6.15291	3.44302	4.03789	11.1333	8.99332	8.14933	7.82337	8.63239	9.27279	2.81079	3.07916	2.7992	BraA01g014090.3C	protein_coding	chrA01:7446323-7449386:+	gi|685259770|ref|XP_009137085.1|	2475	0	PREDICTED: probable polygalacturonase [Brassica rapa]	gi|923508801|ref|XM_013883103.1|	1482	0	PREDICTED: Brassica napus probable polygalacturonase (LOC106441268), mRNA	A7PZL3	688
BraA01g014100.3C	5.97535	4.47616	6.62338	3.18776	3.44991	3.77368	11.957	12.4165	13.342	9.48114	8.40849	8.62664	3.99176	5.60856	5.46639	3.28354	2.92492	6.28022	0.615488	0.378449	0.441897	0.199148	0.204082	0.159531	0.400453	0.0503151	0.144839	0.413987	0.476016	0.826835	0.24894	0.0987267	0.137203	1.15341	2.07552	0.932669	BraA01g014100.3C	protein_coding	chrA01:7449750-7452827:-	gi|685259768|ref|XP_009137076.1|	3151	0	PREDICTED: LOW QUALITY PROTEIN: uncharacterized protein LOC103861120 [Brassica rapa]	gi|685259767|ref|XM_009138828.1|	1063	0	PREDICTED: Brassica rapa uncharacterized LOC103861120 (LOC103861120), mRNA	Q9C5Q9	117
BraA01g014230.3C	28.0425	6.93154	31.3355	17.5238	19.0179	17.8502	13.5116	14.0275	13.6718	23.94	21.0128	21.6794	130.463	122.436	141.843	2.07626	2.54641	5.14062	20.1579	28.6165	30.8399	48.1667	41.0797	42.0313	65.5196	92.5828	82.7317	9.1136	10.1244	8.8106	79.4399	86.8778	79.2379	21.4124	18.9924	21.0033	BraA01g014230.3C	protein_coding	chrA01:7536155-7537482:+	gi|685259791|ref|XP_009137157.1|	1425	0	PREDICTED: probable WRKY transcription factor 29 [Brassica rapa]	gi|685259790|ref|XM_009138909.1|	891	0	PREDICTED: Brassica rapa probable WRKY transcription factor 29 (LOC103861203), mRNA	Q9SUS1	392
BraA01g014260.3C	0	0	0	0	0	0	0	0	0	0	0	0	0	0	0	0	0	0	46.8062	49.7231	45.7738	66.5418	97.0042	91.5279	37.7129	34.4559	33.1803	40.0089	38.1693	39.6162	46.8424	49.3456	49.0235	62.9866	76.2784	78.5363	BraA01g014260.3C	protein_coding	chrA01:7550765-7555877:+	gi|922409950|ref|XP_013623591.1|	1409	6e-180	PREDICTED: uncharacterized protein LOC106329476 [Brassica oleracea var. oleracea]	gi|923732554|ref|XM_013813117.1|	607	0	PREDICTED: Brassica napus uncharacterized LOC106372849 (LOC106372849), mRNA	.	.
BraA01g014280.3C	69.4481	14.6663	65.8344	73.7301	80.9916	75.5556	30.2016	26.7747	30.915	103.427	95.2252	102.839	64.6034	66.9	61.5716	2.22477	1.96681	1.70638	35.4263	37.5571	36.4497	23.8334	13.0762	14.2554	99.3149	96.1222	91.5224	49.7309	49.5899	47.4973	78.7616	75.8358	66.6905	9.73605	10.2898	7.23035	BraA01g014280.3C	protein_coding	chrA01:7571122-7573080:+	gi|685259807|ref|XP_009137227.1|	2113	0	PREDICTED: probable aminotransferase TAT4 [Brassica rapa]	gi|685259806|ref|XM_009138979.1|	1275	0	PREDICTED: Brassica rapa probable aminotransferase TAT4 (LOC103861263), mRNA	Q8VYP2	637
BraA01g014300.3C	1.21763	2.02531	1.11859	0.112361	0.138439	0.343361	1.18585	0.906818	0.550205	5.52344	4.99055	4.20351	1.15687	1.04493	0.838716	1.37033	1.65852	2.06749	2.59334	3.33153	1.79296	1.81806	1.19771	1.38703	1.30564	2.23106	1.63708	3.59939	4.96643	3.95388	2.20768	2.18885	1.90865	7.4055	6.33793	4.99346	BraA01g014300.3C	protein_coding	chrA01:7590698-7591417:+	gi|685259813|ref|XP_009137249.1|	1268	2e-175	PREDICTED: uncharacterized protein LOC103861293 [Brassica rapa]	gi|685259812|ref|XM_009139001.1|	720	0	PREDICTED: Brassica rapa uncharacterized LOC103861293 (LOC103861293), mRNA	.	.
BraA01g014380.3C	69.3856	32.7209	75.1309	127.335	119.398	122.802	134.084	137.831	128.872	128.245	129.448	135.507	73.9078	80.8003	79.3481	13.8499	18.5186	42.4555	50.5591	51.4676	57.8567	160.333	133.563	149.176	182.148	244.062	240.006	98.3961	90.685	85.6514	239.505	221.433	213.269	74.9955	77.2753	98.267	BraA01g014380.3C	protein_coding	chrA01:7630632-7631192:-	gi|685259827|ref|XP_009137314.1|	899	3e-121	PREDICTED: dirigent protein 6-like [Brassica rapa]	gi|923841286|ref|XM_013845499.1|	561	0	PREDICTED: Brassica napus dirigent protein 6-like (LOC106404837), mRNA	Q9SUQ8	325
BraA01g014390.3C	1.46473	0.314588	1.78682	0.988999	1.1373	1.17532	0.521892	0.456101	0.484288	2.76234	2.54312	3.19208	0.942846	1.26464	1.23039	0.251283	0.389285	0.839907	2.39134	1.70152	1.91633	1.67645	0.585677	0.366258	2.64321	3.34995	3.02969	1.9713	2.45065	2.28497	2.40042	2.34216	2.16998	0.611089	0.96851	0.75132	BraA01g014390.3C	protein_coding	chrA01:7641308-7644625:-	gi|685259829|ref|XP_009137322.1|	3909	0	PREDICTED: cation/H(+) antiporter 17 [Brassica rapa]	gi|685259828|ref|XM_009139074.1|	2454	0	PREDICTED: Brassica rapa cation/H(+) antiporter 17 (LOC103861367), mRNA	Q9SUQ7	1303
BraA01g014480.3C	19.3719	53.4332	19.3011	35.6912	30.444	35.8587	46.2322	52.334	44.589	34.9674	32.0897	33.4312	33.8512	31.0642	25.5681	50.0388	46.5585	40.6734	54.3142	38.5245	40.8891	47.0321	44.5844	38.7114	18.0781	15.6061	15.8637	20.6517	24.8219	22.7702	14.1734	14.0525	16.5172	16.4613	16.1316	19.0492	BraA01g014480.3C	protein_coding	chrA01:7719672-7721764:+	gi|685259842|ref|XP_009137390.1|	1587	0	PREDICTED: high mobility group B protein 6 [Brassica rapa]	gi|685259841|ref|XM_009139142.1|	1095	0	PREDICTED: Brassica rapa high mobility group B protein 6 (LOC103861435), mRNA	Q9SUP7	512
BraA01g014550.3C	7.18197	7.75392	8.34202	7.08447	3.37885	4.88853	9.40644	9.22188	9.23225	6.38302	8.01337	11.3155	3.9216	2.39094	2.68064	0	0.337325	0.646934	19.3401	9.5366	13.5448	7.39549	12.9921	10.1559	4.51443	3.73696	4.09804	17.8139	15.3814	13.6467	3.96194	4.4519	4.12463	4.00085	2.68556	1.56249	BraA01g014550.3C	protein_coding	chrA01:7752838-7753191:+	gi|685259856|ref|XP_009137456.1|	430	3e-52	PREDICTED: uncharacterized protein LOC103861489 [Brassica rapa]	gi|922412698|ref|XM_013784029.1|	354	0	PREDICTED: Brassica oleracea var. oleracea uncharacterized LOC106344708 (LOC106344708), mRNA	.	.
BraA01g014560.3C	24.3805	36.2717	23.1814	8.47525	6.64506	6.43557	51.3915	56.1413	53.7629	29.2671	33.5005	28.9936	21.3305	19.3461	17.4179	7.28233	7.96088	10.033	20.1539	16.076	14.0509	19.0562	18.7983	17.8808	27.2171	27.3576	31.95	90.9926	98.1418	96.2898	21.9062	20.4832	21.4314	77.4403	85.2904	61.8092	BraA01g014560.3C	protein_coding	chrA01:7754573-7755097:-	gi|685259858|ref|XP_009137467.1|	744	5e-98	PREDICTED: uncharacterized protein LOC103861498 [Brassica rapa]	gi|685259857|ref|XM_009139219.1|	525	0	PREDICTED: Brassica rapa uncharacterized LOC103861498 (LOC103861498), mRNA	.	.
BraA01g014620.3C	33.9123	38.1781	33.1624	20.2443	16.8507	20.7001	9.29655	12.9174	12.2968	5.2659	5.32847	4.84612	12.1101	11.7667	12.7713	8.59892	8.32585	8.74937	18.5132	25.7104	27.3017	31.0774	24.9837	24.0366	41.3017	27.7068	28.491	5.69302	6.83062	6.26194	24.916	28.4222	24.1999	33.4998	31.054	27.4712	BraA01g014620.3C	protein_coding	chrA01:7775041-7777386:+	gi|685259870|ref|XP_009137528.1|	1782	0	PREDICTED: UDP-glucose 4-epimerase 2 [Brassica rapa]	gi|685259869|ref|XM_009139280.1|	1047	0	PREDICTED: Brassica rapa UDP-glucose 4-epimerase 2 (LOC103861558), mRNA	Q9T0A7	642
BraA01g014670.3C	0.312548	0.509672	0.638054	1.15366	0.888378	1.02825	1.1161	0.886728	1.52998	1.23519	0.842761	0.634692	0.769873	1.06169	0.717618	3.73727	3.68954	3.26581	0.739632	0.633447	0.438308	0.722223	1.02478	0.890074	0.726133	0.786028	0.538735	0.872579	1.15891	0.615091	0.33334	0.550828	0.255167	1.28705	1.52517	1.25983	BraA01g014670.3C	protein_coding	chrA01:7793398-7795532:+	gi|685259877|ref|XP_009137568.1|	2829	0	PREDICTED: uncharacterized protein slp1 [Brassica rapa]	gi|685259876|ref|XM_009139320.1|	1683	0	PREDICTED: Brassica rapa uncharacterized protein slp1 (LOC103861598), mRNA	F4JPE9	827
BraA01g014680.3C	13.7663	20.6528	13.8545	15.3777	14.9377	14.8922	20.7456	20.556	23.3541	106.817	106.228	107.554	17.8471	18.9642	15.3999	4.34882	5.72394	5.48878	59.6192	39.8438	42.3197	22.1	24.812	24.045	35.9969	30.0916	30.0232	95.7616	97.3435	87.93	53.5253	55.4694	49.0255	16.4329	14.7187	15.3899	BraA01g014680.3C	protein_coding	chrA01:7807060-7810065:+	gi|923873162|ref|XP_013710271.1|	3032	0	PREDICTED: auxin response factor 9-like isoform X1 [Brassica napus]	gi|685259878|ref|XM_009139329.1|	1812	0	PREDICTED: Brassica rapa auxin response factor 9 (LOC103861608), mRNA	Q9XED8	952
BraA01g014690.3C	0.0830204	3.57407	0	0.038305	0	0.0390183	0.121281	0.220816	0.18757	0.171181	0.179087	0.084295	0.306746	0.178113	0.12254	0.0583948	0	1.19278	0.210498	0.420648	0.392937	0.177083	0.725884	0.425567	0.712169	0.939549	1.45963	2.16781	2.15486	2.77752	0.0442717	0.131682	0.122002	2.72184	2.43074	1.92056	BraA01g014690.3C	protein_coding	chrA01:7811431-7814466:+	gi|923873154|ref|XP_013710268.1|	3613	0	PREDICTED: cellulose synthase-like protein G2 [Brassica napus]	gi|923873153|ref|XM_013854814.1|	2106	0	PREDICTED: Brassica napus cellulose synthase-like protein G2 (LOC106414108), mRNA	Q8VYR4	1092
BraA01g014840.3C	27.1022	34.5878	29.5885	160.604	172.959	172.899	219.307	226.287	233.881	69.8529	57.1922	64.2491	121.783	117.934	112.357	317.441	313.941	60.1779	86.6437	48.8386	49.0791	121.651	134.195	138.256	159.331	125.735	115.164	25.4279	29.165	30.2628	211.133	229.767	225.113	194.842	204.322	206.182	BraA01g014840.3C	protein_coding	chrA01:7889041-7889784:-	gi|685259905|ref|XP_009137701.1|	819	4e-107	PREDICTED: uncharacterized protein LOC103861739 [Brassica rapa]	gi|685259904|ref|XM_009139453.1|	744	0	PREDICTED: Brassica rapa uncharacterized LOC103861739 (LOC103861739), mRNA	.	.
BraA01g014850.3C	0.502274	1.25093	0.932157	1.51688	2.07658	2.36061	0.755982	0.825852	1.08322	0.517823	0.640235	0.741796	1.92812	1.66535	1.88711	6.35919	5.09994	2.32593	3.61215	2.31357	2.44931	2.19141	2.94437	2.39263	2.05639	1.32879	1.46393	1.21479	1.14284	1.30298	3.45762	3.37985	4.02606	8.37458	8.96223	8.01834	BraA01g014850.3C	protein_coding	chrA01:7894937-7897333:+	gi|674956970|emb|CDX76329.1|	3171	0	BnaA08g10710D [Brassica napus]	gi|685259908|ref|XM_009139465.1|	1914	0	PREDICTED: Brassica rapa metal-nicotianamine transporter YSL1 (LOC103861748), transcript variant X2, mRNA	Q6R3L0	1174
BraA01g014870.3C	1.64638	1.09308	1.3204	4.93756	5.88295	4.75317	15.5187	15.0763	14.8788	9.0323	9.0055	9.19409	6.70381	5.80282	7.81098	0.744445	1.28143	0.921588	9.60108	6.49474	6.24623	20.3179	13.8809	17.6826	7.9442	6.65435	6.81082	8.45893	5.72316	6.48011	26.5894	26.9222	27.5929	4.58187	6.63123	6.98667	BraA01g014870.3C	protein_coding	chrA01:7912770-7916242:-	gi|685259914|ref|XP_009137727.1|	2545	0	PREDICTED: uncharacterized protein LOC103861771 [Brassica rapa]	gi|923868411|ref|XM_013853344.1|	1491	0	PREDICTED: Brassica napus uncharacterized LOC106412422 (LOC106412422), mRNA	O22977	865
BraA01g014880.3C	0.651012	1.13238	0.886011	0.667493	1.31585	0.475946	2.46564	1.38524	0.490282	1.49148	0.936215	1.61579	0.152722	0.620749	0.569425	0.407029	0.886732	0.850302	1.46723	1.46602	1.21728	1.38861	1.58113	1.31837	0.387815	0.857599	0.0748095	1.78188	2.48098	1.56589	0.540027	0.688399	0.921254	3.36822	3.29447	3.34672	BraA01g014880.3C	protein_coding	chrA01:7926268-7927761:+	gi|923741855|ref|XP_013671506.1|	1568	0	PREDICTED: growth-regulating factor 8-like isoform X1 [Brassica napus]	gi|685260545|ref|XM_009142384.1|	969	0	PREDICTED: Brassica rapa growth-regulating factor 8 (LOC103864615), mRNA	Q9SU44	432
BraA01g014940.3C	28.5409	19.2472	25.8828	20.7759	24.6928	22.9798	19.0475	19.8401	22.2223	7.15097	6.62272	7.15819	7.92255	12.0756	10.1821	1.43965	2.01345	1.48518	24.2179	32.6096	33.2479	31.4092	26.595	29.5325	27.4338	26.8401	26.5774	11.5405	9.06501	9.51057	25.9525	24.7693	24.9536	14.5877	11.3442	13.1525	BraA01g014940.3C	protein_coding	chrA01:7952754-7953607:-	gi|674898578|emb|CDY34263.1|	1246	1e-171	BnaA01g13660D [Brassica napus]	gi|685259924|ref|XM_009139517.1|	767	0	PREDICTED: Brassica rapa thaumatin-like protein 1b (LOC103861809), mRNA	A0A1P8B554	440
BraA01g014980.3C	31.3159	23.62	36.161	22.2768	25.4076	22.1999	16.1592	15.9033	17.0549	49.3912	48.2865	49.1748	40.3968	40.5678	38.3903	34.8015	30.2351	33.4834	5.38186	5.90758	6.28877	4.46377	4.81942	8.25834	3.20567	3.22223	3.47835	7.65906	7.6904	8.08978	4.54357	5.05804	2.3431	7.8127	5.83543	7.93767	BraA01g014980.3C	protein_coding	chrA01:7962561-7963812:+	gi|685259933|ref|XP_009137807.1|	2015	0	PREDICTED: 3-oxo-Delta(4,5)-steroid 5-beta-reductase [Brassica rapa]	gi|685259932|ref|XM_009139559.1|	1173	0	PREDICTED: Brassica rapa 3-oxo-Delta(4,5)-steroid 5-beta-reductase (LOC103861849), mRNA	Q9STX2	690
BraA01g014990.3C	58.6031	73.0529	65.4159	56.03	59.4136	63.6277	67.6032	44.0941	46.642	5.08862	3.12657	4.13656	9.09783	9.24467	8.17194	4.18814	5.54914	7.67475	65.5535	103.529	105.97	114.055	115.853	118.073	72.1639	66.8789	68.4677	12.5062	15.3242	13.337	39.6067	38.1919	36.8426	19.8042	19.4556	18.701	BraA01g014990.3C	protein_coding	chrA01:7964687-7966234:-	gi|685259937|ref|XP_009137826.1|	1390	0	PREDICTED: acyl-CoA-binding domain-containing protein 3 isoform X2 [Brassica rapa]	gi|685259936|ref|XM_009139578.1|	1109	0	PREDICTED: Brassica rapa acyl-CoA-binding domain-containing protein 3 (LOC103861859), transcript variant X2, mRNA	Q9STX1	284
BraA01g015000.3C	14.6116	20.0319	14.6466	19.6195	19.6964	17.9288	28.2901	21.2237	20.9539	7.66727	9.15379	9.59449	8.31285	11.075	8.093	22.4012	24.6692	15.999	7.72011	7.00442	7.91416	13.4371	16.1607	16.0464	6.09821	3.67782	4.61489	4.6555	4.54197	3.70205	4.94571	3.70077	3.8573	11.8898	8.91864	9.66031	BraA01g015000.3C	protein_coding	chrA01:7967089-7968473:+	gi|685259940|ref|XP_009137837.1|	1712	0	PREDICTED: probable WRKY transcription factor 7 [Brassica rapa]	gi|685259941|ref|XM_009139596.1|	1002	0	PREDICTED: Brassica rapa probable WRKY transcription factor 7 (LOC103861876), transcript variant X2, mRNA	Q9STX0	467
BraA01g015130.3C	0.38051	1.41474	0.466079	0.280903	0.259573	0.357668	1.33409	0.647727	1.1176	1.01995	0.492488	0.540893	0.562368	0.65308	0.449312	0.856457	1.14023	1.29218	1.54365	1.07966	1.20064	1.13629	0.332697	0.866895	0.326411	1.14834	0.865764	2.62455	2.89238	2.09675	0.892813	0.402363	0.969236	2.09726	0.660201	0.800234	BraA01g015130.3C	protein_coding	chrA01:8003848-8004999:-	gi|685259966|ref|XP_009137963.1|	1933	0	PREDICTED: protein ROOT PRIMORDIUM DEFECTIVE 1 [Brassica rapa]	gi|685259965|ref|XM_009139715.1|	1152	0	PREDICTED: Brassica rapa protein ROOT PRIMORDIUM DEFECTIVE 1 (LOC103861996), mRNA	Q689D6	128
BraA01g015160.3C	1.51154	2.95785	1.37145	0.697415	0.763801	0.552535	1.96279	1.96552	0.948629	0.432872	0.271718	0.42632	1.41839	0.81072	0.495793	5.67033	4.80398	10.5294	4.08802	5.78657	4.94608	4.74665	3.02869	2.96538	3.33164	3.43936	4.60293	2.64783	2.02394	2.56155	6.80665	3.55189	5.34751	6.46385	4.46205	3.44377	BraA01g015160.3C	protein_coding	chrA01:8020433-8023137:+	gi|685259973|ref|XP_009137991.1|	1755	0	PREDICTED: bark storage protein A-like [Brassica rapa]	gi|685259972|ref|XM_009139743.1|	1044	0	PREDICTED: Brassica rapa bark storage protein A-like (LOC103862027), mRNA	Q07469	175
BraA01g015170.3C	11.8017	24.5603	9.17816	12.9648	12.779	13.3823	41.2312	19.3322	17.7758	13.5189	15.7596	15.2163	12.6564	16.4777	12.5347	10.014	22.7089	18.8399	3.22979	3.22713	2.36434	1.39851	3.48052	3.84101	2.00868	1.81715	1.5499	3.69168	5.20954	4.23959	1.79811	2.37703	1.65172	30.0848	5.89102	6.69734	BraA01g015170.3C	protein_coding	chrA01:8023924-8024391:-	gi|685259975|ref|XP_009138002.1|	342	1e-37	PREDICTED: histone-lysine N-methyltransferase SETD1B [Brassica rapa]	gi|685259974|ref|XM_009139754.1|	468	0	PREDICTED: Brassica rapa histone-lysine N-methyltransferase SETD1B (LOC103862038), mRNA	.	.
BraA01g015210.3C	0.814269	0.265566	1.06202	0.542673	0.668621	0.170086	0.264339	0.192513	0.357718	0.746201	0.585497	0.55118	0.191021	0.194104	0.22257	0	0	0.118171	15.1402	11.7354	13.132	33.4342	74.211	78.4296	38.0779	24.8663	25.1235	1.7384	1.50964	1.55796	17.9477	17.1728	18.2592	14.1002	13.6373	20.3591	BraA01g015210.3C	protein_coding	chrA01:8058021-8061322:+	gi|685260554|ref|XP_009140666.1|	3416	0	PREDICTED: probable rhamnogalacturonate lyase B [Brassica rapa]	gi|685260553|ref|XM_009142418.1|	1938	0	PREDICTED: Brassica rapa probable rhamnogalacturonate lyase B (LOC103864654), mRNA	Q0C7K7	91.7
BraA01g015350.3C	10.9125	46.8701	11.1387	8.27775	7.46518	6.43259	37.6471	29.5167	32.281	46.5266	51.7674	49.0149	9.17688	10.9122	7.644	19.9045	20.0282	7.36809	191.616	159.408	161.852	84.7221	87.5287	94.1778	97.6753	125.79	128.352	217.786	207.373	207.658	87.0909	90.2596	87.8825	82.1694	74.9119	95.1043	BraA01g015350.3C	protein_coding	chrA01:8148016-8148963:+	gi|685260042|ref|XP_009138231.1|	1496	0	PREDICTED: mitochondrial uncoupling protein 4 [Brassica rapa]	gi|685260041|ref|XM_009139983.1|	948	0	PREDICTED: Brassica rapa mitochondrial uncoupling protein 4 (LOC103862285), mRNA	Q9SB52	500
BraA01g015360.3C	1.53634	0.511724	1.56819	0.995415	1.18927	1.56702	1.30524	0.486882	0.73853	3.74071	2.53846	3.41857	1.62186	2.31427	2.12292	1.19559	1.87001	2.17743	1.85653	1.88812	1.58151	0.976138	0.785968	0.856423	1.08658	1.79682	1.82555	1.93256	1.63629	1.76907	1.35965	1.20979	0.800608	1.77061	0.992517	1.16866	BraA01g015360.3C	protein_coding	chrA01:8149294-8155358:-	gi|685260048|ref|XP_009138248.1|	3580	0	PREDICTED: rho GTPase-activating protein REN1 isoform X2 [Brassica rapa]	gi|685260047|ref|XM_009140000.1|	2375	0	PREDICTED: Brassica rapa rho GTPase-activating protein REN1 (LOC103862294), transcript variant X3, mRNA	F4JQZ3	1120
BraA01g015730.3C	8.50802	24.9733	6.04132	16.7262	23.1316	14.6037	26.2989	23.2198	29.6693	12.2037	19.1509	15.0237	10.1531	13.4915	8.73599	27.0597	27.7119	22.7082	21.3845	22.4914	20.2315	28.7996	29.1089	29.075	14.6761	12.3597	8.79911	15.3088	12.3446	14.1957	11.8357	13.2994	14.4961	18.2794	16.8477	16.3369	BraA01g015730.3C	protein_coding	chrA01:8335162-8335514:-	gi|685260180|ref|XP_009138763.1|	413	7e-51	PREDICTED: mitochondrial import inner membrane translocase subunit TIM8-like [Brassica rapa]	gi|923521791|ref|XM_013814836.1|	237	3e-120	PREDICTED: Brassica napus mitochondrial import inner membrane translocase subunit TIM8-like (LOC106374911), mRNA	Q9XGY4	105
BraA01g015810.3C	2.97816	1.18377	2.65991	1.88939	1.69301	2.18701	2.62852	1.8813	1.26162	1.91897	4.11557	3.96885	5.3054	4.79203	4.67056	2.35662	2.02825	3.64673	1.699	2.64071	1.95773	0.397028	0.406865	1.06015	1.89609	1.0031	1.54003	1.10045	2.93327	2.38103	1.29037	1.77142	1.91473	0.707532	0.605535	0.587178	BraA01g015810.3C	protein_coding	chrA01:8382144-8383476:-	gi|685260202|ref|XP_009138851.1|	1570	0	PREDICTED: respiratory burst oxidase homolog protein C-like [Brassica rapa]	gi|685260201|ref|XM_009140603.1|	942	0	PREDICTED: Brassica rapa respiratory burst oxidase homolog protein C-like (LOC103862893), mRNA	O81210	203
BraA01g015820.3C	746.632	562.858	727.38	2008.2	2029.71	1986.92	917.283	912.729	991.144	2581.52	2629.86	2583.26	2064.77	2192.58	2189.64	561.643	600.056	494.406	2246.79	1473.73	1648.8	2127.97	1710.61	1556.13	1634.44	1568.21	1581.39	2771.63	2668.9	2785.64	2190.93	2137.71	2074.51	924.905	987.586	1014.34	BraA01g015820.3C	protein_coding	chrA01:8384349-8386024:-	gi|923641432|ref|XP_013641388.1|	941	1e-126	PREDICTED: superoxide dismutase [Fe] 1, chloroplastic-like [Brassica napus]	gi|685260203|ref|XM_009140616.1|	639	0	PREDICTED: Brassica rapa superoxide dismutase [Fe] 1, chloroplastic (LOC103862899), mRNA	P21276	344
BraA01g015910.3C	0	0.534441	0	0.378038	0.155259	0.385078	0.531972	0.726423	2.46821	2.39334	1.47286	0.970574	1.58574	1.61134	2.01561	0	0.186002	0.713441	0.969471	2.76763	3.15982	1.16511	1.34322	2.64444	6.14995	15.7486	18.6422	8.88074	11.8992	10.6153	2.62155	1.44399	2.54189	100.182	107.656	69.212	BraA01g015910.3C	protein_coding	chrA01:8430832-8431550:+	gi|685260225|ref|XP_009138970.1|	816	1e-107	PREDICTED: 23.6 kDa heat shock protein, mitochondrial [Brassica rapa]	gi|685260224|ref|XM_009140722.1|	642	0	PREDICTED: Brassica rapa 23.6 kDa heat shock protein, mitochondrial (LOC103862989), mRNA	Q96331	275
BraA01g015940.3C	13.8426	18.5601	13.6062	6.6234	9.90931	9.1563	14.4799	4.36363	2.31665	3.17136	3.87079	4.16447	7.03595	4.94966	5.04491	5.76981	4.18994	8.0356	17.6789	19.7424	15.0986	18.5907	9.52564	15.7684	4.39796	9.39392	5.83251	9.59837	4.75257	4.54034	6.56154	13.5533	8.03642	25.8218	26.1301	22.6424	BraA01g015940.3C	protein_coding	chrA01:8445360-8445530:-	gi|685260232|ref|XP_009139009.1|	296	8e-34	PREDICTED: uncharacterized protein LOC103863022 [Brassica rapa]	gi|685260231|ref|XM_009140761.1|	171	1e-83	PREDICTED: Brassica rapa uncharacterized LOC103863022 (LOC103863022), mRNA	.	.
BraA01g015980.3C	0	0	0	0	0.166127	0.274689	0	0	0	1.20512	1.89116	2.07703	0	0	0.14378	0	0	0	1.77829	0.444205	0.614728	0.311667	0.159694	0.332888	0.783386	1.1024	0.906691	3.88734	3.6571	4.4571	0.779182	0.618029	0.715744	0	0	0	BraA01g015980.3C	protein_coding	chrA01:8472551-8473150:+	gi|685260238|ref|XP_009139038.1|	826	1e-109	PREDICTED: 21 kDa protein-like [Brassica rapa]	gi|685260237|ref|XM_009140790.1|	600	0	PREDICTED: Brassica rapa 21 kDa protein-like (LOC103863047), mRNA	Q9SB38	248
BraA01g016120.3C	0	0.227527	0	0.643767	0	0.0728618	0.075492	0.0824692	0	0.319659	0.167211	0.0787052	0.16366	0.166302	0	0.545224	0.633492	0	0.786157	0	0.326115	1.32272	0.59303	0.971291	0.498707	0.0835471	0.0801672	0.0763796	0.50299	0	2.39748	1.4754	2.35417	0.0736621	0.252172	0.0815092	BraA01g016120.3C	protein_coding	chrA01:8541498-8542937:-	gi|923521874|ref|XP_013670555.1|	2045	0	PREDICTED: gibberellin 20 oxidase 1 [Brassica napus]	gi|685260275|ref|XM_009140962.1|	1128	0	PREDICTED: Brassica rapa gibberellin 20 oxidase 1-like (LOC103863201), mRNA	Q39110	666
BraA01g016380.3C	5.68378	4.14461	4.98063	6.2345	5.12097	5.84659	3.81214	3.93628	3.45266	8.45792	5.78335	8.16656	6.2832	7.65002	7.12304	6.26078	5.11249	7.70386	2.77348	2.39083	2.93265	2.63058	2.46135	2.62645	2.64483	2.36952	1.71911	2.90593	2.98234	1.84668	4.23189	3.23189	3.20443	1.52866	2.03511	1.52235	BraA01g016380.3C	protein_coding	chrA01:8688421-8690570:-	gi|685260320|ref|XP_009139380.1|	2520	0	PREDICTED: protochlorophyllide-dependent translocon component 52, chloroplastic [Brassica rapa]	gi|685260319|ref|XM_009141132.1|	810	0	PREDICTED: Brassica rapa protochlorophyllide-dependent translocon component 52, chloroplastic (LOC103863379), mRNA	Q8W496	842
BraA01g016410.3C	66.216	108.357	58.0009	91.1731	81.3493	88.6199	91.9319	61.6883	66.4176	39.3336	39.6492	37.7963	41.3781	43.1655	41.6505	81.4042	85.1372	76.9441	14.5838	17.1571	18.7833	13.6045	18.5043	15.9839	12.9321	15.6236	12.7129	8.45571	5.15993	9.01462	15.831	14.715	16.5871	16.1995	7.54515	5.1215	BraA01g016410.3C	protein_coding	chrA01:8695913-8697162:+	gi|685260322|ref|XP_009139388.1|	1280	6e-177	PREDICTED: deSI-like protein At4g17486 [Brassica rapa]	gi|685260321|ref|XM_009141140.1|	756	0	PREDICTED: Brassica rapa deSI-like protein At4g17486 (LOC103863388), mRNA	Q5PQ09	79
BraA01g016430.3C	7.25324	11.8279	7.29631	15.9084	16.3736	12.8452	13.5136	13.9797	13.0624	3.90145	5.21542	3.62893	10.2093	10.1486	9.41293	36.0821	33.0749	31.7161	4.26448	5.85881	5.63869	4.03597	4.94019	5.14898	2.81794	2.49259	3.26148	0.725057	1.16934	1.13781	4.4845	4.44625	3.81043	2.69715	2.27983	1.65804	BraA01g016430.3C	protein_coding	chrA01:8703730-8705643:-	gi|674944213|emb|CDX89399.1|	1247	1e-170	BnaA01g14940D [Brassica napus]	gi|685260333|ref|XM_009141189.1|	393	0	PREDICTED: Brassica rapa beta-carotene 3-hydroxylase 1, chloroplastic (LOC103863442), mRNA	Q9SZZ8	412
BraA01g016440.3C	108.8	190.735	111.148	132.344	133.106	132.104	148.432	164.734	159.779	49.0389	48.1032	53.7745	87.4239	85.7484	86.4449	154.826	154.564	184.269	27.2671	42.2792	42.7472	44.6882	44.8127	49.6771	24.3934	23.4533	23.8064	11.4294	8.08521	8.05154	23.3035	23.1999	26.7798	46.9964	30.1295	34.1328	BraA01g016440.3C	protein_coding	chrA01:8709460-8711622:-	gi|685260336|ref|XP_009139444.1|	1485	0	PREDICTED: glutaminyl-peptide cyclotransferase [Brassica rapa]	gi|685260335|ref|XM_009141196.1|	924	0	PREDICTED: Brassica rapa glutaminyl-peptide cyclotransferase (LOC103863450), mRNA	Q84WV9	435
BraA01g016470.3C	5.25597	0.822808	4.07735	10.8643	13.3857	14.0309	8.80433	11.1838	9.73744	3.6847	5.66893	4.05586	15.7579	16.6888	16.7571	2.36604	1.14545	5.21736	4.26448	5.32619	8.62388	17.4892	15.395	17.9616	13.7515	16.9949	16.9597	4.76466	6.43135	5.79247	41.0332	33.5692	30.0715	2.99683	2.50781	3.75822	BraA01g016470.3C	protein_coding	chrA01:8729198-8729614:+	gi|685260346|ref|XP_009139490.1|	548	5e-69	PREDICTED: protein GLUTAMINE DUMPER 2 [Brassica rapa]	gi|685260345|ref|XM_009141242.1|	417	0	PREDICTED: Brassica rapa protein GLUTAMINE DUMPER 2 (LOC103863494), mRNA	Q9SW07	152
BraA01g016530.3C	21.2071	111.888	19.161	25.4685	25.4958	24.6076	84.6898	77.7272	81.9576	46.0287	40.7124	51.6166	28.4933	29.9328	28.2567	40.8244	44.3653	33.5305	57.3209	45.0374	44.2903	36.4694	43.5833	43.1136	27.5273	38.2779	40.2974	66.9886	68.6647	68.494	36.4701	38.0903	40.2606	94.4008	88.1368	72.2344	BraA01g016530.3C	protein_coding	chrA01:8751266-8752750:+	gi|685377799|ref|XP_009121735.1|	1422	0	PREDICTED: probable xyloglucan endotransglucosylase/hydrolase protein 23 [Brassica rapa]	gi|685260363|ref|XM_009141310.1|	864	0	PREDICTED: Brassica rapa probable xyloglucan endotransglucosylase/hydrolase protein 23 (LOC103863560), mRNA	Q38910	518
BraA01g016660.3C	20.0629	12.4697	19.6658	7.85572	6.67903	6.83213	11.0545	13.4003	9.9543	5.49179	4.34933	4.90318	6.77963	9.07859	9.60166	3.08149	3.4583	4.68173	1.96914	4.18728	3.71769	3.71664	3.21021	3.45931	3.57662	5.79507	4.78831	2.10935	1.15373	1.86151	3.07956	3.26387	3.21902	2.22354	1.67356	2.04162	BraA01g016660.3C	protein_coding	chrA01:8819372-8822332:-	gi|685260397|ref|XP_009139694.1|	2492	0	PREDICTED: putative clathrin assembly protein At4g25940 [Brassica rapa]	gi|685260396|ref|XM_009141446.1|	639	0	PREDICTED: Brassica rapa putative clathrin assembly protein At4g25940 (LOC103863693), mRNA	Q8VYT2	869
BraA01g016730.3C	0.248973	0.852601	0.285901	0.229748	0.424605	0.234027	0.697116	0.860877	0.457039	1.15506	0.704903	0.979582	0.755643	0.534149	0.459361	0.350244	0.381512	0.325189	0.252508	0.346912	0.458263	0.96255	0.81633	0.850832	0.500566	1.0063	0.514982	2.36126	2.04831	2.41926	0.99576	0.658178	0.609792	0.88724	1.11369	0.883581	BraA01g016730.3C	protein_coding	chrA01:8877001-8884148:+	gi|685260424|ref|XP_009139813.1|	4738	0	PREDICTED: calcium-transporting ATPase 8, plasma membrane-type-like isoform X1 [Brassica rapa]	gi|685260426|ref|XM_009141572.1|	1126	0	PREDICTED: Brassica rapa calcium-transporting ATPase 8, plasma membrane-type-like (LOC103863808), transcript variant X2, mRNA	Q9SZR1	774
BraA01g016770.3C	5.22843	1.6443	4.57442	2.15389	1.48612	1.40416	0.727425	1.78797	1.16018	15.5933	12.789	19.0544	8.27921	5.50841	7.44164	0	0.127171	0.365838	2.9354	3.1222	3.43698	1.99148	1.42858	1.59531	7.30827	6.74222	7.24194	7.54377	7.35661	7.809	18.2224	18.5606	18.0194	2.66172	1.31618	1.76716	BraA01g016770.3C	protein_coding	chrA01:8906664-8908062:+	gi|685260429|ref|XP_009139829.1|	1550	0	PREDICTED: peroxidase 44 [Brassica rapa]	gi|685260428|ref|XM_009141581.1|	936	0	PREDICTED: Brassica rapa peroxidase 44 (LOC103863825), mRNA	Q93V93	535
BraA01g016790.3C	53.6125	40.2016	47.547	16.964	22.7331	20.0337	6.91897	3.97402	7.03269	4.98356	5.05572	5.50305	6.49472	8.87796	7.99978	4.53342	3.89066	6.40935	1.33706	1.85549	1.92584	1.3279	0.720426	1.0846	0.706814	1.02623	0.605975	1.15469	2.57996	1.65758	1.24982	0.929367	1.43508	0.348003	0.158845	0.30806	BraA01g016790.3C	protein_coding	chrA01:8933085-8936057:+	gi|685260433|ref|XP_009139849.1|	1593	0	PREDICTED: plant intracellular Ras-group-related LRR protein 8-like isoform X2 [Brassica rapa]	gi|685260432|ref|XM_009141601.1|	1197	0	PREDICTED: Brassica rapa plant intracellular Ras-group-related LRR protein 8-like (LOC103863836), transcript variant X2, mRNA	Q8RWE5	518
BraA01g016800.3C	63.3169	27.72	65.0497	43.0454	47.0302	47.1356	38.3482	39.7759	43.2414	19.9438	19.4591	19.8509	41.4953	43.7104	44.8215	49.3126	47.84	66.0344	14.8886	16.6142	20.2745	12.7301	14.7699	13.5968	18.3158	16.0444	14.402	7.70573	7.24934	8.50515	14.5594	16.1761	16.5999	24.446	29.6811	31.7389	BraA01g016800.3C	protein_coding	chrA01:8936808-8938393:-	gi|685260435|ref|XP_009139861.1|	2142	0	PREDICTED: protein phosphatase 2C 56-like [Brassica rapa]	gi|685260434|ref|XM_009141613.1|	1278	0	PREDICTED: Brassica rapa protein phosphatase 2C 56-like (LOC103863846), mRNA	P49597	718
BraA01g016880.3C	1.6406	3.11007	1.36062	11.6383	14.9223	15.132	4.79335	4.8	2.89581	11.3112	9.73226	10.6194	17.8605	18.0388	17.1527	17.4537	18.4357	15.4016	6.55158	2.59769	2.58833	10.6076	14.5686	15.3012	17.262	8.50978	9.22597	4.44556	5.98823	5.34751	12.9044	13.5533	12.6574	32.058	21.3488	28.4647	BraA01g016880.3C	protein_coding	chrA01:8971891-8972745:-	gi|685260451|ref|XP_009139926.1|	1096	8e-148	PREDICTED: uncharacterized protein LOC103863917 [Brassica rapa]	gi|685260450|ref|XM_009141678.1|	855	0	PREDICTED: Brassica rapa uncharacterized LOC103863917 (LOC103863917), mRNA	.	.
BraA01g016990.3C	0.456612	0.558449	0.349559	0.632032	0.778719	1.2876	2.22348	1.33594	2.06327	0.823809	0.861855	0.811339	0.48203	0.734715	1.01095	0.963514	0.932916	0.149098	1.85238	1.96653	1.3207	2.31315	4.86569	3.771	1.59125	2.33769	2.12506	1.34977	1.90474	1.79722	1.70446	0.96567	0.89468	6.1833	3.09469	3.36098	BraA01g016990.3C	protein_coding	chrA01:9048636-9049746:-	gi|685260785|ref|XP_009142090.1|	1325	0	PREDICTED: probable caffeoyl-CoA O-methyltransferase At4g26220 isoform X1 [Brassica rapa]	gi|685260784|ref|XM_009143842.1|	756	0	PREDICTED: Brassica rapa probable caffeoyl-CoA O-methyltransferase At4g26220 (LOC103865968), transcript variant X1, mRNA	Q9C5D7	416
BraA01g017010.3C	2.8372	4.27501	2.78018	31.2081	29.4834	30.7225	10.5553	8.15004	9.23062	12.2852	12.9749	10.6012	9.46464	11.2609	11.4466	36.4801	38.6451	15.7864	98.8129	94.5911	97.4612	275.719	298.675	298.371	271.371	190.329	193.134	60.5536	60.1758	60.0794	346.229	346.636	345.947	186.845	177.585	230.676	BraA01g017010.3C	protein_coding	chrA01:9054880-9057625:-	gi|685260795|ref|XP_009142127.1|	2584	0	PREDICTED: ATP-dependent 6-phosphofructokinase 3 [Brassica rapa]	gi|685260794|ref|XM_009143879.1|	1083	0	PREDICTED: Brassica rapa ATP-dependent 6-phosphofructokinase 3 (LOC103866006), mRNA	Q94AA4	967
BraA01g017050.3C	5.51381	1.88819	5.06531	2.79843	0.626893	1.55484	1.07398	0.879931	1.24575	3.69493	2.37881	2.79923	4.07452	5.32322	2.98411	1.55132	1.87757	0.720172	1.95723	3.63186	2.89966	3.82233	3.31441	1.88427	9.75537	6.53717	3.7066	3.53148	3.83344	1.35639	9.11496	6.12198	5.67193	0.523974	0.597918	1.44948	BraA01g017050.3C	protein_coding	chrA01:9075026-9075343:-	gi|685260811|ref|XP_009142192.1|	476	1e-59	PREDICTED: uncharacterized protein LOC103866066 [Brassica rapa]	gi|685260810|ref|XM_009143944.1|	318	4e-165	PREDICTED: Brassica rapa uncharacterized LOC103866066 (LOC103866066), mRNA	.	.
BraA01g017200.3C	2.32751	1.01213	1.9798	2.7444	2.79328	3.28168	1.25931	0.550281	0.876432	4.13259	5.2997	5.38294	3.00309	3.46768	4.07164	0.363805	0.352251	0.844449	11.1471	11.662	12.3762	10.205	10.0339	8.24855	10.3989	8.91958	12.9718	10.4478	10.3084	10.9424	7.17124	9.29778	8.3609	2.21182	3.22505	3.39922	BraA01g017200.3C	protein_coding	chrA01:9168103-9169540:+	gi|685260847|ref|XP_009142368.1|	1096	7e-150	PREDICTED: probable calcium-binding protein CML21 [Brassica rapa]	gi|685260846|ref|XM_009144120.1|	678	0	PREDICTED: Brassica rapa probable calcium-binding protein CML21 (LOC103866236), mRNA	Q52K82	398
BraA01g017220.3C	0.523713	0	0.320742	0.386619	0.238174	0.0984548	0	0.222874	0.236647	0.107985	0.338917	0.638104	0.33172	0.449431	0.206136	0	0	0.136807	0	0.636852	0.771164	0	0.228953	0.596573	1.57239	1.12893	2.59983	0.309625	0.388382	0.721464	1.56395	0.775305	1.23139	0.79629	0.567915	0.11014	BraA01g017220.3C	protein_coding	chrA01:9176175-9177011:-	gi|685260849|ref|XP_009142379.1|	1470	0	PREDICTED: nicotianamine synthase 1 [Brassica rapa]	gi|923510038|ref|XM_013886762.1|	837	0	PREDICTED: Brassica napus nicotianamine synthase 1-like (LOC106445243), mRNA	Q9FF79	396
BraA01g017240.3C	2.98874	3.68238	3.50265	11.849	15.2283	13.1102	14.3381	10.5992	12.6297	6.0484	2.746	4.60813	6.31021	4.51219	5.44621	36.2826	38.8998	20.9641	5.95008	5.3843	6.63626	14.1667	17.0583	16.7705	5.93474	4.29508	5.15165	1.74516	4.00188	2.83198	11.6877	11.2369	13.2304	18.1982	18.2456	15.1317	BraA01g017240.3C	protein_coding	chrA01:9182073-9182864:+	gi|685260851|ref|XP_009142392.1|	1204	6e-165	PREDICTED: protein YLS9 [Brassica rapa]	gi|923510017|ref|XM_013886708.1|	792	0	PREDICTED: Brassica napus protein YLS9-like (LOC106445190), mRNA	.	.
BraA01g017270.3C	0.162803	1.27432	0.0830892	1.65256	1.2957	1.22424	0.792772	1.29906	0.459781	1.25882	1.49256	0.909165	1.28899	0.960519	1.602	6.06915	6.31992	5.20971	0.990689	0.412446	0.5137	3.3858	3.02485	3.33815	1.65842	0.701889	0.50512	1.12293	1.43371	1.44178	1.21544	0.430382	0.398743	1.23769	2.38334	3.16705	BraA01g017270.3C	protein_coding	chrA01:9190087-9191415:+	gi|685260859|ref|XP_009142435.1|	1819	0	PREDICTED: fructose-bisphosphate aldolase, cytoplasmic isozyme [Brassica rapa]	gi|685260858|ref|XM_009144187.1|	1074	0	PREDICTED: Brassica rapa fructose-bisphosphate aldolase, cytoplasmic isozyme (LOC103866289), mRNA	O65581	672
BraA01g017280.3C	2.27262	0.706313	2.07411	4.41632	4.19496	4.34778	5.23382	4.3806	4.71173	7.33213	6.37306	6.89538	4.77003	4.58889	4.65673	0.827464	1.05611	3.10801	1.51851	1.49016	1.49042	3.47881	3.1559	3.25883	3.46897	4.78366	5.17082	2.13395	1.90842	2.42041	4.22027	4.26909	3.85048	2.33751	2.31946	2.27726	BraA01g017280.3C	protein_coding	chrA01:9193689-9197050:-	gi|685260861|ref|XP_009142444.1|	4910	0	PREDICTED: probable LRR receptor-like serine/threonine-protein kinase At4g26540 [Brassica rapa]	gi|685260860|ref|XM_009144196.1|	3279	0	PREDICTED: Brassica rapa probable LRR receptor-like serine/threonine-protein kinase At4g26540 (LOC103866300), mRNA	C0LGR3	1672
BraA01g017450.3C	2.8162	2.79536	3.7078	4.14293	3.80513	3.8748	2.10671	2.60538	2.02869	4.41819	4.84234	3.43961	3.74852	3.72146	3.49409	2.23923	2.72404	3.73162	0.579516	0.785837	0.858558	0.78352	0.356859	0.790376	0.831527	1.45169	0.759797	1.60867	1.55122	1.64661	0.565887	0.517901	0.719742	2.01686	1.01796	1.41628	BraA01g017450.3C	protein_coding	chrA01:9290227-9293411:+	gi|923509945|ref|XP_013741805.1|	3587	0	PREDICTED: glutamate--tRNA ligase, cytoplasmic-like [Brassica napus]	gi|923509946|ref|XM_013886360.1|	1951	0	PREDICTED: Brassica napus glutamate--tRNA ligase, cytoplasmic-like (LOC106444913), transcript variant X2, mRNA	O82462	1174
BraA01g017520.3C	2.87852	1.28575	1.91621	1.21264	1.06719	1.23522	1.21887	0.798909	0.989662	6.32234	5.87189	5.21005	4.16177	3.69193	4.74135	0.264089	0.681874	0.899058	5.45798	4.88276	4.60717	2.33583	1.98336	1.42564	5.63635	6.07013	5.37154	3.82291	2.66836	3.6945	9.94417	6.35233	7.17276	4.75728	3.59647	4.27705	BraA01g017520.3C	protein_coding	chrA01:9339359-9341318:+	gi|685260926|ref|XP_009142784.1|	2502	0	PREDICTED: phosphatidate cytidylyltransferase [Brassica rapa]	gi|685260927|ref|XM_009144543.1|	1401	0	PREDICTED: Brassica rapa phosphatidate cytidylyltransferase (LOC103866590), transcript variant X2, mRNA	Q1PE48	866
BraA01g017540.3C	0.664163	0.893518	0.423708	1.14915	0.566341	1.09251	7.19598	6.62448	5.72088	4.70748	5.3726	4.88911	2.36633	1.33585	2.69587	1.05111	0.565404	3.03618	3.45217	2.35563	1.8337	6.72917	6.17001	7.37649	4.98518	6.5321	2.83341	3.59939	4.77147	2.77752	10.5367	7.72536	9.02813	10.4929	6.39195	8.38063	BraA01g017540.3C	protein_coding	chrA01:9345753-9347265:+	gi|685260931|ref|XP_009142811.1|	1814	0	PREDICTED: GDSL esterase/lipase At4g26790 [Brassica rapa]	gi|685260934|ref|XM_009144579.1|	1056	0	PREDICTED: Brassica rapa GDSL esterase/lipase At4g26790 (LOC103866615), transcript variant X3, mRNA	Q8VY93	634
BraA01g017630.3C	31.2605	29.1532	28.0094	14.6877	14.622	16.3976	23.314	24.2495	24.4535	25.6645	24.1716	26.8275	16.1307	16.9374	17.9803	13.345	11.8806	13.8041	44.4895	40.5171	43.3256	34.2901	38.6189	39.0908	47.4469	55.3775	57.2196	47.6154	45.7986	49.2414	32.7291	29.8243	33.6821	80.4682	85.4723	67.818	BraA01g017630.3C	protein_coding	chrA01:9391586-9392962:+	gi|685261354|ref|XP_009144845.1|	2451	0	PREDICTED: mitogen-activated protein kinase kinase kinase ANP1 [Brassica rapa]	gi|685261353|ref|XM_009146597.1|	1374	0	PREDICTED: Brassica rapa mitogen-activated protein kinase kinase kinase ANP1 (LOC103868503), mRNA	O80888	287
BraA01g017680.3C	2.62259	2.19943	2.29454	4.84018	4.25966	3.52165	7.66244	4.78321	9.73439	5.02131	2.82865	2.28245	4.74614	8.03791	4.424	20.0279	21.9435	16.1485	1.89988	2.65763	2.75839	3.19658	8.59893	9.81592	4.82084	6.46098	3.48727	12.1825	11.1137	12.1658	1.59832	1.98086	3.67048	14.9534	6.50044	9.06111	BraA01g017680.3C	protein_coding	chrA01:9417859-9418972:-	gi|567218990|ref|XP_006413124.1|	164	5e-12	hypothetical protein EUTSA_v10025360mg [Eutrema salsugineum]	gi|923522029|ref|XR_001275324.1|	75	4e-30	PREDICTED: Brassica napus probable beta-1,3-galactosyltransferase 4 (LOC106375647), transcript variant X3, misc_RNA	Q8LEJ9	65.1
BraA01g017930.3C	0	0	0	0	0	0	0	0	0	0	0	0	0	0	0	0	0	0	2.7411	5.82002	8.70568	4.3237	4.43083	5.5802	3.26034	7.8288	6.46388	5.32626	6.10691	4.15542	2.88252	4.10828	2.64784	9.79195	11.1738	7.10497	BraA01g017930.3C	protein_coding	chrA01:9533557-9534075:+	gi|685261370|ref|XP_009144927.1|	919	1e-124	PREDICTED: uncharacterized protein LOC103868589 [Brassica rapa]	gi|923510199|ref|XR_001288547.1|	519	0	PREDICTED: Brassica napus disease resistance protein At4g27190-like (LOC106445715), transcript variant X7, misc_RNA	.	.
BraA01g017940.3C	0	0	0	0	0	0	0	0	0	0	0	0	0	0	0	0	0	0	8.20748	10.0231	6.14728	8.15129	21.6202	26.1189	9.15959	3.87659	3.25479	4.87302	9.1688	8.84784	4.31547	6.6557	6.60687	17.5168	13.6509	14.1826	BraA01g017940.3C	protein_coding	chrA01:9534783-9534977:+	.	.	.	.	gi|923510199|ref|XR_001288547.1|	195	6e-97	PREDICTED: Brassica napus disease resistance protein At4g27190-like (LOC106445715), transcript variant X7, misc_RNA	.	.
BraA01g017970.3C	0.273754	0.267846	0	1.89462	0.855922	1.35093	1.06644	0.873749	0.773122	0.4939	0.590525	0.76438	0.36124	0.440485	0.404065	3.27339	3.16944	1.25145	1.59643	0.277411	0.287929	2.62764	3.44072	2.72859	0.954006	1.77034	1.98184	0.741794	0.634417	0.336715	3.72256	2.60527	3.21833	1.82102	1.63272	0.935543	BraA01g017970.3C	protein_coding	chrA01:9544053-9545433:+	gi|685261009|ref|XP_009143234.1|	2119	0	PREDICTED: uncharacterized protein LOC103866964 [Brassica rapa]	gi|685261008|ref|XM_009144986.1|	1281	0	PREDICTED: Brassica rapa uncharacterized LOC103866964 (LOC103866964), mRNA	.	.
BraA01g018010.3C	5.76836	13.7132	6.03393	5.19098	5.04071	5.60133	2.27498	2.68812	1.99259	4.52164	5.29606	3.77554	2.21435	2.76147	1.97023	4.15794	4.67523	3.1133	6.04366	5.21741	5.2648	4.06743	4.53293	4.88742	7.15654	5.70342	5.7685	3.05332	3.00505	3.42439	11.4907	10.3845	9.43427	1.94802	1.91275	3.05786	BraA01g018010.3C	protein_coding	chrA01:9589366-9591863:+	gi|685261011|ref|XP_009143243.1|	3278	0	PREDICTED: indole-3-acetic acid-amido synthetase GH3.5 [Brassica rapa]	gi|685261010|ref|XM_009144995.1|	1839	0	PREDICTED: Brassica rapa indole-3-acetic acid-amido synthetase GH3.5 (LOC103866974), mRNA	O81829	1216
BraA01g018030.3C	2.16765	0.471306	2.78623	0.85197	0.502031	0.716908	0.19547	0.811438	0.408119	1.57261	2.25138	2.24169	1.90693	2.36831	2.1725	0.112939	0.0546764	0.26215	2.56484	2.72543	3.1243	1.79808	1.14067	1.23461	4.82084	4.36981	4.11	2.6501	3.23736	2.44896	4.66653	4.54183	3.50007	0.610343	0.740005	1.09746	BraA01g018030.3C	protein_coding	chrA01:9606129-9609156:+	gi|685261019|ref|XP_009143289.1|	3061	0	PREDICTED: G-type lectin S-receptor-like serine/threonine-protein kinase At4g27290 [Brassica rapa]	gi|685261018|ref|XM_009145041.1|	1762	0	PREDICTED: Brassica rapa G-type lectin S-receptor-like serine/threonine-protein kinase At4g27290 (LOC103867012), mRNA	O81832	914
BraA01g018090.3C	56.4844	53.3459	57.3392	44.3092	46.1398	46.2992	36.3047	39.9897	40.2447	10.433	10.9148	9.75082	28.4517	31.2371	27.2318	9.58747	10.1269	18.8822	32.3611	48.7631	57.5628	38.5454	43.5633	42.5814	49.8267	46.1886	47.3102	24.8269	22.6864	20.8299	35.2422	33.5221	34.902	41.9994	41.5437	36.8096	BraA01g018090.3C	protein_coding	chrA01:9636720-9638327:-	gi|685261029|ref|XP_009143344.1|	1450	0	PREDICTED: uncharacterized protein LOC103867063 [Brassica rapa]	gi|923510220|ref|XM_013887470.1|	849	0	PREDICTED: Brassica napus uncharacterized LOC106445829 (LOC106445829), mRNA	.	.
BraA01g018290.3C	27.3579	16.3386	28.8317	59.3431	66.7536	61.7842	52.5092	53.8657	58.3986	173.167	175.032	176.588	74.0773	79.2748	81.6355	84.469	87.9569	128.429	14.9542	6.03074	4.67118	9.2837	15.5326	14.469	8.38152	6.89302	6.33857	39.2979	45.9453	41.2541	9.66281	9.11076	8.78907	23.2125	16.3746	12.7026	BraA01g018290.3C	protein_coding	chrA01:9750250-9751322:-	gi|922404721|ref|XP_013621137.1|	630	3e-76	PREDICTED: early nodulin-like protein 2 [Brassica oleracea var. oleracea]	gi|685261065|ref|XM_009145301.1|	984	0	PREDICTED: Brassica rapa early nodulin-like protein 2 (LOC103867244), mRNA	Q9T076	197
BraA01g018350.3C	139.471	270.146	139.729	61.9103	60.7297	61.8505	98.9521	93.5472	103.482	47.2203	50.3056	44.475	27.513	26.3654	27.3594	22.7783	23.9002	23.7609	52.0793	65.8299	58.0124	28.8275	23.3373	25.8668	22.4121	21.763	25.6862	43.0338	44.1926	46.0215	16.3749	18.8956	14.1569	19.1881	18.5381	19.1971	BraA01g018350.3C	protein_coding	chrA01:9773377-9775318:-	gi|685261079|ref|XP_009143609.1|	2186	0	PREDICTED: uncharacterized protein LOC103867304 [Brassica rapa]	gi|685261078|ref|XM_009145361.1|	1299	0	PREDICTED: Brassica rapa uncharacterized LOC103867304 (LOC103867304), mRNA	Q55480	115
BraA01g018450.3C	9.2794	51.0872	12.1578	12.0136	14.0145	11.1959	23.6047	25.1969	29.8832	64.111	61.2459	67.4999	15.0594	16.0453	17.8532	39.9409	46.0297	18.6323	137.937	62.8764	66.2799	34.564	47.984	45.4368	52.4237	45.0814	52.8545	355.64	363.335	370.142	66.4705	67.661	69.6069	118.848	98.3731	85.9246	BraA01g018450.3C	protein_coding	chrA01:9820026-9822324:-	gi|685261110|ref|XP_009143753.1|	472	1e-56	PREDICTED: uncharacterized protein LOC103867429 isoform X1 [Brassica rapa]	gi|685261113|ref|XR_632659.1|	320	7e-166	PREDICTED: Brassica rapa uncharacterized LOC103867429 (LOC103867429), transcript variant X3, misc_RNA	.	.
BraA01g018560.3C	0	0.127078	0	1.07867	0	0.732504	0.758947	1.24364	1.02705	0.937312	0.280171	0.26375	6.03287	5.57295	6.13461	0.365421	0	0.508921	0.922075	1.18455	0.409818	0	0.709753	0.739751	2.36757	9.23919	10.6116	6.65487	8.30748	9.07395	1.66226	1.09872	0.508973	263.265	143.519	101.201	BraA01g018560.3C	protein_coding	chrA01:9895389-9896157:-	gi|923506258|ref|XP_013698943.1|	1078	4e-147	PREDICTED: 25.3 kDa heat shock protein, chloroplastic-like [Brassica napus]	gi|685261128|ref|XM_009145607.1|	675	0	PREDICTED: Brassica rapa 25.3 kDa heat shock protein, chloroplastic (LOC103867529), mRNA	P31170	328
BraA01g018600.3C	78.3511	58.9838	76.2872	186.661	189.838	189.899	108.039	112.426	113.144	204.556	207.439	196.761	290.431	284.035	305.275	170.236	154.9	185.381	44.3607	33.5321	31.1364	72.9476	72.9537	79.5754	85.4418	60.0566	56.7091	53.5926	53.004	53.7684	64.0248	63.8138	66.0161	75.8421	79.6022	98.1861	BraA01g018600.3C	protein_coding	chrA01:9904917-9907148:+	gi|685261139|ref|XP_009143901.1|	2319	0	PREDICTED: molybdate-anion transporter-like [Brassica rapa]	gi|685261138|ref|XM_009145653.1|	1383	0	PREDICTED: Brassica rapa molybdate-anion transporter-like (LOC103867571), mRNA	Q6N075	221
BraA01g018680.3C	0.503848	0.657301	0.857156	0.852396	0.19095	0.394668	2.61706	2.68025	2.46644	1.29862	0.452863	0.511583	0.443246	0.54048	0.578425	0.354396	0.228761	0.438725	0.255501	0.340387	0.264969	1.25383	1.2849	0.956574	0.540266	0.543056	0.694782	3.64076	2.64669	2.64418	1.34342	0.887973	1.0695	2.07482	1.54806	2.03094	BraA01g018680.3C	protein_coding	chrA01:9937636-9939050:+	gi|685261155|ref|XP_009143986.1|	1766	0	PREDICTED: calumenin-A [Brassica rapa]	gi|685261154|ref|XM_009145738.1|	1044	0	PREDICTED: Brassica rapa calumenin-A (LOC103867645), mRNA	Q96D15	70.5
BraA01g018690.3C	5.39505	7.03818	5.65987	3.18069	4.25966	3.23992	6.12995	6.37762	3.89376	7.8796	6.9504	8.97763	16.9279	16.5581	19.0232	26.3525	30.8229	35.0373	7.9035	8.50443	6.93539	12.7863	9.66356	8.53559	7.87403	13.568	17.8238	15.8004	15.837	17.5482	5.91379	8.39885	8.22188	13.5293	16.2511	11.6613	BraA01g018690.3C	protein_coding	chrA01:9945625-9946347:-	gi|685261157|ref|XP_009143998.1|	928	2e-125	PREDICTED: uncharacterized protein At4g00950-like [Brassica rapa]	gi|685261156|ref|XM_009145750.1|	585	0	PREDICTED: Brassica rapa uncharacterized protein At4g00950-like (LOC103867650), mRNA	.	.
BraA01g018700.3C	0	0	0	0.0453222	0.0558409	0.0461662	0.239164	0.261268	0	0.10127	0.0529735	0.0498686	0.0518486	0	0.0483294	0.138185	0.0668982	0.1283	0.199248	0.0497708	0.206631	0.052381	0	0.0559475	0.0526646	0.0529366	0	0	0	0.144986	0.314292	0.415482	0.192469	0.56008	0.372819	0.67139	BraA01g018700.3C	protein_coding	chrA01:9953866-9956940:+	gi|674944038|emb|CDX89224.1|	2243	0	BnaA01g16690D [Brassica napus]	gi|922410405|ref|XM_013770976.1|	449	0	PREDICTED: Brassica oleracea var. oleracea uncharacterized LOC106332506 (LOC106332506), mRNA	Q8W4P8	124
BraA01g018730.3C	0.201539	0.0985951	0	0	0	0	0.196279	0.32163	0.455342	0	0	0	0.531895	0.972864	1.28906	0	0	0	0	0.102116	0.105988	0	0.110134	0	0.108053	0.108611	0	0	0.0934125	0	0	0	0	4.11771	1.20202	0.847696	BraA01g018730.3C	protein_coding	chrA01:9969177-9970166:+	gi|685261166|ref|XP_009144038.1|	1238	3e-169	PREDICTED: protein BOBBER 2 [Brassica rapa]	gi|923602359|ref|XM_013886069.1|	870	0	PREDICTED: Brassica napus protein BOBBER 2-like (LOC106444612), mRNA	Q9STN7	385
BraA01g018800.3C	4.8801	5.6174	5.33289	7.09929	4.96095	6.63787	4.75274	5.68065	5.05886	6.68851	6.00662	5.59626	2.0607	2.70983	2.48578	1.37302	2.34604	1.57476	5.06585	2.55992	2.23428	1.89817	2.25894	3.46622	0.800316	1.23761	0.65315	0.509147	0.904761	1.01689	0.612324	0.546391	0.449976	0.818387	0.622586	0.905569	BraA01g018800.3C	protein_coding	chrA01:10012500-10014646:-	gi|685261186|ref|XP_009144103.1|	2539	0	PREDICTED: S-type anion channel SLAH2-like isoform X1 [Brassica rapa]	gi|685261185|ref|XM_009145855.1|	1527	0	PREDICTED: Brassica rapa S-type anion channel SLAH2-like (LOC103867762), transcript variant X1, mRNA	Q9ASQ7	811
BraA01g018820.3C	1.55548	7.09148	2.06067	1.40483	1.50511	1.33767	6.34962	4.61258	5.60798	1.33068	1.99896	1.04171	0.838503	0.639027	1.20495	3.07277	2.83995	3.76072	0.772001	0.905513	1.11389	1.69423	1.59152	1.80958	1.1356	0.96311	1.06106	0.58699	0.368149	0.553616	0.741238	0.594932	0.940275	2.23297	0.717772	1.49643	BraA01g018820.3C	protein_coding	chrA01:10024761-10029341:+	gi|923522944|ref|XP_013673893.1|	3631	0	PREDICTED: uncharacterized protein LOC106378286 [Brassica napus]	gi|685261189|ref|XM_009145868.1|	2201	0	PREDICTED: Brassica rapa uncharacterized LOC103867777 (LOC103867777), mRNA	Q6AZT2	249
BraA01g018920.3C	1.92125	1.97873	2.06429	1.7729	1.95443	1.04553	4.53005	4.84114	4.45495	3.02321	3.59908	3.28546	4.05639	2.92869	3.98007	0.284498	0.550926	0.132073	1.74342	2.97161	3.61605	4.20589	4.19958	4.60744	2.71068	4.46847	3.76481	0.797097	0.937357	0.199	3.88243	4.59779	4.45792	1.92184	2.0834	2.02024	BraA01g018920.3C	protein_coding	chrA01:10065975-10067160:-	gi|685261210|ref|XP_009144191.1|	1343	0	PREDICTED: transcription factor MYB39-like [Brassica rapa]	gi|685261209|ref|XM_009145943.1|	867	0	PREDICTED: Brassica rapa transcription factor MYB39-like (LOC103867859), mRNA	Q9M0J5	421
BraA01g018990.3C	0.822136	1.9013	0.83918	3.03462	3.48399	3.5829	3.27551	4.69146	4.13709	5.08552	3.94998	3.11137	4.4973	5.37163	3.82432	11.7757	11.1982	6.63811	5.53346	2.95379	3.61605	4.22464	6.53481	4.42715	3.4461	2.01389	2.55079	4.12411	2.4249	2.86819	2.78991	3.39837	3.58787	1.56254	1.13467	2.12195	BraA01g018990.3C	protein_coding	chrA01:10085981-10087153:-	gi|685261225|ref|XP_009144261.1|	1885	0	PREDICTED: uncharacterized protein LOC103867917 [Brassica rapa]	gi|685261224|ref|XM_009146013.1|	1173	0	PREDICTED: Brassica rapa uncharacterized LOC103867917 (LOC103867917), mRNA	.	.
BraA01g019010.3C	0.549308	0.752437	0.336418	3.24411	2.24833	2.68493	3.53081	3.38961	2.60623	13.1385	11.3754	13.0511	3.71127	3.53547	3.02695	63.3649	64.0462	23.9633	2.78554	2.00393	2.42656	7.96742	6.00355	6.88302	7.42155	6.39418	5.90826	12.2325	10.7951	12.1076	4.21813	5.92471	4.84338	3.02762	5.5993	4.15881	BraA01g019010.3C	protein_coding	chrA01:10102148-10103551:-	gi|685261229|ref|XP_009144284.1|	1294	2e-178	PREDICTED: expansin-B3 [Brassica rapa]	gi|685261228|ref|XM_009146036.1|	798	0	PREDICTED: Brassica rapa expansin-B3 (LOC103867937), mRNA	Q9M0I2	461
BraA01g019020.3C	14.3134	10.3575	14.0014	13.8961	13.7309	14.4352	13.7946	13.9592	15.4956	11.836	7.87981	8.32628	8.34207	10.8758	10.7101	4.82412	6.2956	9.54228	15.4239	17.5264	19.2886	21.3078	25.5837	28.0237	18.3856	17.3556	17.7329	11.4593	13.2684	11.2968	27.3509	25.2257	26.2926	8.78458	8.73082	13.9535	BraA01g019020.3C	protein_coding	chrA01:10115147-10115734:-	gi|685261231|ref|XP_009144294.1|	963	2e-130	PREDICTED: E3 ubiquitin-protein ligase RMA2-like isoform X1 [Brassica rapa]	gi|685261236|ref|XM_009146067.1|	588	0	PREDICTED: Brassica rapa E3 ubiquitin-protein ligase RMA2-like (LOC103867947), transcript variant X4, mRNA	P93030	306
BraA01g019060.3C	86.939	99.0018	87.6228	143.261	119.611	137.688	91.7851	99.4909	105.639	41.4258	36.2471	38.2025	60.9286	59.5609	65.7793	25.6937	20.3998	30.0582	12.9667	11.4753	19.5944	15.5833	12.3763	20.8055	10.5757	9.44918	7.55575	3.95933	4.40206	3.23499	12.8565	11.588	13.2413	2.77706	3.96121	4.22523	BraA01g019060.3C	protein_coding	chrA01:10127263-10127700:-	gi|923512620|ref|XP_013750467.1|	184	2e-16	PREDICTED: uncharacterized protein LOC106452836 [Brassica napus]	gi|922417111|ref|XM_013747514.1|	240	7e-122	PREDICTED: Brassica oleracea var. oleracea uncharacterized LOC106310273 (LOC106310273), mRNA	.	.
BraA01g019120.3C	1.4451	0.942613	0.983374	2.8152	4.1988	3.01856	2.18927	2.39161	2.72079	7.4492	8.13959	9.78193	2.54258	2.9281	3.634	15.3597	10.9353	18.4554	2.27986	0.650849	2.19546	4.96612	4.91368	5.67007	3.7878	2.2498	2.49091	2.05679	1.04191	1.57997	5.99371	7.98004	10.6968	2.28879	1.91531	4.72754	BraA01g019120.3C	protein_coding	chrA01:10172892-10173638:-	gi|685261259|ref|XP_009144418.1|	844	1e-112	PREDICTED: early nodulin-like protein 2 [Brassica rapa]	gi|685261258|ref|XM_009146170.1|	382	0	PREDICTED: Brassica rapa early nodulin-like protein 2 (LOC103868075), mRNA	Q9T076	134
BraA01g019200.3C	11.1175	8.28771	13.6176	15.3398	16.4923	15.8245	15.0552	17.1225	19.7356	18.7753	24.0962	23.2214	9.50088	9.99497	8.33507	23.8318	22.3539	13.8294	5.69138	4.29183	5.90228	11.0664	15.0437	20.504	6.24438	5.13542	4.59916	6.36414	3.82788	3.54234	6.43672	6.38182	7.15744	5.83585	4.93715	4.34214	BraA01g019200.3C	protein_coding	chrA01:10200143-10201236:-	gi|685261274|ref|XP_009144501.1|	1231	1e-168	PREDICTED: homeobox-leucine zipper protein HAT1 [Brassica rapa]	gi|923522978|ref|XM_013818535.1|	828	0	PREDICTED: Brassica napus homeobox-leucine zipper protein HAT1 (LOC106378399), mRNA	P46600	415
BraA01g019280.3C	4.41241	4.60029	4.28238	3.73796	4.85221	3.60359	2.81787	3.92484	2.77826	5.59305	5.38324	5.21461	3.13081	2.94856	2.98948	6.61422	4.72924	2.55091	5.86893	6.15729	5.24953	9.7203	9.24963	10.7117	8.14411	5.7693	5.01223	2.70845	1.8775	2.34884	17.5123	17.057	18.7794	6.11778	6.03986	6.23707	BraA01g019280.3C	protein_coding	chrA01:10319773-10321794:-	gi|685261288|ref|XP_009144570.1|	1690	0	PREDICTED: uncharacterized protein LOC103868211 [Brassica rapa]	gi|685261287|ref|XM_009146322.1|	1212	0	PREDICTED: Brassica rapa uncharacterized LOC103868211 (LOC103868211), mRNA	Q8W4K5	87.4
BraA01g019290.3C	8.38275	2.05046	7.60581	11.2809	11.1192	9.08334	3.51504	3.46831	3.55112	30.0078	30.3891	25.7708	4.67051	6.36948	5.61372	0.163785	0.158583	0.760341	10.3911	9.08466	7.34734	7.94689	8.90726	7.69223	35.8298	31.2463	32.9925	61.1466	56.1219	56.8236	18.1292	16.6203	19.5047	1.21704	1.76755	2.69338	BraA01g019290.3C	protein_coding	chrA01:10326198-10327072:-	gi|685261292|ref|XP_009144590.1|	1062	7e-144	PREDICTED: probable aquaporin TIP2-2 [Brassica rapa]	gi|685261291|ref|XM_009146342.1|	753	0	PREDICTED: Brassica rapa probable aquaporin TIP2-2 (LOC103868228), mRNA	Q41975	403
BraA01g019320.3C	25.0693	11.2659	26.6304	38.8025	41.9252	41.7171	54.5079	63.5774	60.7558	46.3564	44.3313	44.1008	49.5445	53.2366	52.2771	5.43348	4.76462	17.7996	17.5907	17.0592	20.0821	34.7419	25.0095	30.3833	26.2561	35.346	34.3683	14.2898	14.727	15.3458	53.0077	52.7097	56.8311	47.4386	33.0331	39.4649	BraA01g019320.3C	protein_coding	chrA01:10339280-10340646:+	gi|685261296|ref|XP_009144614.1|	2027	0	PREDICTED: auxin-induced in root cultures protein 12 [Brassica rapa]	gi|685261295|ref|XM_009146366.1|	1203	0	PREDICTED: Brassica rapa auxin-induced in root cultures protein 12 (LOC103868252), mRNA	Q8VYH6	721
BraA01g019360.3C	160.508	316.131	155.761	162.408	149.514	156.449	218.055	211.325	210.484	104.768	107.118	105.971	125.487	131.873	131.888	246.35	259.178	245.803	22.0615	23.1565	20.1058	24.6053	28.3368	35.9168	11.0734	8.8808	9.77135	16.4543	15.7853	17.5127	15.818	17.3095	16.2522	30.485	19.8954	24.8373	BraA01g019360.3C	protein_coding	chrA01:10358838-10361778:+	gi|674910589|emb|CDY22499.1|	433	1e-49	BnaC03g23090D [Brassica napus]	gi|923900533|ref|XR_001284880.1|	288	6e-148	PREDICTED: Brassica napus uncharacterized LOC106424467 (LOC106424467), transcript variant X4, misc_RNA	P49107	67.4
BraA01g019520.3C	634.993	688.5	604.662	216.378	209.147	215.593	155.456	170.195	155.197	47.4124	46.3371	43.8576	42.2804	51.0808	56.2517	11.4649	13.6382	46.6849	110.877	212.369	237.931	96.6043	87.6729	93.1025	78.5259	88.9703	94.2814	147.761	151.745	162.108	102.566	112.649	99.919	90.8354	95.1952	79.0873	BraA01g019520.3C	protein_coding	chrA01:10422097-10423516:+	gi|687567671|ref|NP_001288835.1|	1225	1e-168	expansin-like B1 precursor [Brassica rapa]	gi|687567670|ref|NM_001301906.1|	753	0	Brassica rapa expansin-like B1 (EXPLB1), mRNA	O23547	442
BraA01g019590.3C	0.692258	5.0799	0.656138	6.25116	6.01541	6.13519	4.38224	5.47116	4.91554	5.30169	4.05324	5.12103	3.91497	3.50077	4.1358	9.25147	8.89032	4.8438	6.51938	3.80818	4.83669	7.11929	7.83611	7.94199	2.59803	1.81202	2.19897	3.41059	3.39193	3.98976	3.00598	3.08492	1.74394	0.704838	1.39413	1.14389	BraA01g019590.3C	protein_coding	chrA01:10443744-10446350:+	gi|685261431|ref|XP_009145288.1|	3042	0	PREDICTED: uncharacterized protein LOC103868993 [Brassica rapa]	gi|685261430|ref|XM_009147040.1|	1773	0	PREDICTED: Brassica rapa uncharacterized LOC103868993 (LOC103868993), mRNA	.	.
BraA01g019640.3C	0.945589	1.36575	1.05711	1.12188	1.38226	1.43905	1.62256	1.43718	1.98379	1.57835	0.922752	2.14881	1.56864	1.01434	1.37355	1.77362	1.96262	1.52912	0.365339	0.775704	0.473596	0.528249	0.59055	0.410339	0.434544	0.679448	0.605392	0.665526	0.793071	0.84184	0.192094	0.285684	0.220568	1.11254	0.781255	1.08901	BraA01g019640.3C	protein_coding	chrA01:10467169-10469115:-	gi|685261440|ref|XP_009145326.1|	3247	0	PREDICTED: pentatricopeptide repeat-containing protein At4g16835, mitochondrial [Brassica rapa]	gi|685261439|ref|XM_009147078.1|	1947	0	PREDICTED: Brassica rapa pentatricopeptide repeat-containing protein At4g16835, mitochondrial (LOC103869033), mRNA	Q9M4P3	1069
BraA01g019870.3C	1.7711	10.8305	2.0338	2.04293	2.13951	2.80932	0.107805	0.117769	0.500186	0.456483	0.238782	0.449573	0.233712	0.118742	0.217848	0.155719	0	0.14458	3.36797	12.0025	8.49908	1.53472	1.45177	2.0175	0.830864	0.715847	0.801368	1.41794	2.25747	3.48551	0.472232	0.468204	0.216892	1.89345	2.04062	1.62957	BraA01g019870.3C	protein_coding	chrA01:10666523-10667574:+	gi|685261496|ref|XP_009145604.1|	1402	0	PREDICTED: pheophorbidase [Brassica rapa]	gi|685261495|ref|XM_009147356.1|	792	0	PREDICTED: Brassica rapa pheophorbidase (LOC103869295), mRNA	Q2V0W1	504
BraA01g019970.3C	0.119522	0	0	0.0551466	0	0.0561736	0.116403	0.0635806	0.0675098	0.184834	0.128913	0	0.0630878	0	0	0	0	0	0.0606096	0.0605596	0	0.127471	0	0.13615	0.128161	0.0644116	0	0.765514	0.664776	0.411633	0.127474	0.0631931	0.175643	0.113581	0.12961	0.0628405	BraA01g019970.3C	protein_coding	chrA01:10738713-10742976:-	gi|685261513|ref|XP_009145691.1|	2544	0	PREDICTED: putative glucuronosyltransferase PGSIP7 [Brassica rapa]	gi|685261512|ref|XM_009147443.1|	1467	0	PREDICTED: Brassica rapa putative glucuronosyltransferase PGSIP7 (LOC103869363), mRNA	F4JMI5	884
BraA01g020080.3C	0	0	0	0	0	0	0	0	0	0	0.283957	0	0.555855	0	0	0	0	0	8.0103	7.7369	5.81499	10.9505	11.2218	13.7954	19.1965	20.1469	24.5052	27.7574	23.1848	28.2374	13.7585	9.46531	13.4121	25.5189	9.42125	9.41248	BraA01g020080.3C	protein_coding	chrA01:10786286-10786618:+	gi|685261533|ref|XP_009145792.1|	490	2e-61	PREDICTED: cysteine proteinase inhibitor 4-like isoform X1 [Brassica rapa]	gi|685261534|ref|XM_009147552.1|	327	5e-170	PREDICTED: Brassica rapa cysteine proteinase inhibitor 4-like (LOC103869457), transcript variant X2, mRNA	Q84WT8	104
BraA01g020100.3C	0	0	0	0	0	0.247468	0	0	0	0	0	0	0	0	0.259063	0	0	0	28.3031	27.7461	27.9673	43.2403	33.0898	52.1824	86.1019	82.8576	95.5701	91.3142	100.061	56.2157	55.8765	52.0592	47.9742	58.2933	28.5492	35.4352	BraA01g020100.3C	protein_coding	chrA01:10793306-10793638:+	gi|923522204|ref|XP_013671639.1|	491	1e-61	PREDICTED: cysteine proteinase inhibitor 4-like [Brassica napus]	gi|685261534|ref|XM_009147552.1|	327	5e-170	PREDICTED: Brassica rapa cysteine proteinase inhibitor 4-like (LOC103869457), transcript variant X2, mRNA	Q84WT8	103
BraA01g020130.3C	201.879	236.326	196.019	215.183	207.15	198.729	221.585	251.9	239.508	93.4579	83.6225	77.5101	135.362	134.668	150.529	75.0885	73.1101	177.993	106.455	113.317	95.0319	82.6871	76.2623	65.8982	82.8151	87.421	81.7255	43.4865	50.3093	40.7858	69.3313	70.3166	68.3608	29.7542	29.4261	27.5934	BraA01g020130.3C	protein_coding	chrA01:10811311-10811604:+	gi|923812634|ref|XP_013691369.1|	492	4e-62	PREDICTED: cysteine proteinase inhibitor 4-like [Brassica napus]	gi|923812643|ref|XM_013835919.1|	288	2e-148	PREDICTED: Brassica napus cysteine proteinase inhibitor 4-like (LOC106395469), mRNA	Q84WT8	72.8
BraA01g020200.3C	3.41497	1.47893	2.45718	2.4797	2.99155	3.15734	3.54393	3.27586	4.30045	2.36637	1.93221	2.55792	1.59569	2.88256	2.03826	4.48901	4.19395	2.99796	1.64656	2.32598	2.00199	1.73148	2.50861	2.35955	1.68083	2.11188	2.14224	2.9788	2.491	2.31366	0.71649	0.710378	1.15177	7.18206	5.76727	4.53282	BraA01g020200.3C	protein_coding	chrA01:10838260-10839923:+	gi|685261552|ref|XP_009145886.1|	2742	0	PREDICTED: pentatricopeptide repeat-containing protein At4g16470 [Brassica rapa]	gi|685261551|ref|XM_009147638.1|	1566	0	PREDICTED: Brassica rapa pentatricopeptide repeat-containing protein At4g16470 (LOC103869554), mRNA	O23491	761
BraA01g020210.3C	0.0456612	0.402083	0.0932157	0.126406	0.0519146	0.300441	0.578104	0.680113	0.515817	0.235374	0.0984977	0.231811	0.144609	0.293886	0.0449312	0.578108	0.124389	0.477114	0.879882	1.98967	1.58484	1.07135	1.44723	1.56041	0.685463	0.689002	1.4167	1.34977	1.35448	1.16819	0.87658	0.772536	0.984148	2.77706	2.77284	2.59276	BraA01g020210.3C	protein_coding	chrA01:10840271-10842637:-	gi|922407109|ref|XP_013616106.1|	3201	0	PREDICTED: probable receptor-like protein kinase At1g67000 isoform X1 [Brassica oleracea var. oleracea]	gi|922407108|ref|XM_013760652.1|	1587	0	PREDICTED: Brassica oleracea var. oleracea probable receptor-like protein kinase At1g67000 (LOC106322587), transcript variant X1, mRNA	F4HQ20	700
BraA01g020470.3C	9.04527	29.1032	14.0267	6.58116	7.31748	8.17527	16.0937	18.3214	11.3971	21.8786	19.5119	22.6071	3.67261	4.47826	5.6485	2.69172	1.18465	3.18076	9.1737	5.28815	6.22046	4.45238	3.61214	3.17036	5.40909	3.18722	1.79899	8.74137	8.38488	11.468	6.86423	4.04662	5.96453	3.14072	2.6408	3.29239	BraA01g020470.3C	protein_coding	chrA01:10988007-10988590:-	gi|674900715|emb|CDY32237.1|	236	1e-21	BnaA01g17470D [Brassica napus]	gi|923510418|ref|XM_013888186.1|	289	9e-149	PREDICTED: Brassica napus basic proline-rich protein-like (LOC106446449), mRNA	.	.
BraA01g020550.3C	370.922	485.595	365.614	261.004	253.459	246.223	516.423	563.892	543.965	527.154	518.571	509.892	422.334	454.456	465.397	40.7654	44.4742	75.1654	160.36	235.255	236.876	241.063	189.225	197.129	222.499	237.813	245.33	519.116	525.599	551.013	369.219	368.487	342.277	114.883	125.608	150.297	BraA01g020550.3C	protein_coding	chrA01:11055747-11057545:+	gi|685261610|ref|XP_009146295.1|	1795	0	PREDICTED: glucan endo-1,3-beta-glucosidase, basic vacuolar isoform [Brassica rapa]	gi|685261609|ref|XM_009148047.1|	1074	0	PREDICTED: Brassica rapa glucan endo-1,3-beta-glucosidase, basic vacuolar isoform (LOC103869960), mRNA	Q8VZJ2	614
BraA01g020560.3C	21.5174	21.877	22.8231	39.3621	38.731	40.8471	26.082	27.1933	26.9711	4.81872	4.36001	5.00231	16.8919	18.2486	16.6984	14.6906	12.6755	20.3495	3.07485	3.54169	4.38458	3.00889	3.54365	4.12512	1.53517	1.40694	1.52422	0.705356	0.702613	0.538648	1.8413	1.20222	1.52637	1.36052	0.913246	1.19551	BraA01g020560.3C	protein_coding	chrA01:11068034-11070767:-	gi|685261613|ref|XP_009146314.1|	3140	0	PREDICTED: ABC transporter D family member 2, chloroplastic [Brassica rapa]	gi|685261612|ref|XM_009148066.1|	2082	0	PREDICTED: Brassica rapa ABC transporter D family member 2, chloroplastic (LOC103869976), mRNA	Q6NLC1	955
BraA01g020680.3C	2.26976	3.33118	2.89602	11.5198	12.903	13.3344	8.28947	10.8667	8.01269	8.77511	7.03828	6.0496	12.5796	9.43479	11.7257	31.93	34.3941	39.6514	19.5669	18.6882	17.0095	22.3916	22.6363	29.7337	16.1241	13.7609	9.6831	7.8278	15.5174	7.81703	33.5881	28.5013	30.0195	29.9276	42.458	48.0327	BraA01g020680.3C	protein_coding	chrA01:11137178-11138791:+	gi|685261628|ref|XP_009146416.1|	541	2e-69	PREDICTED: uncharacterized protein LOC103870066 [Brassica rapa]	gi|923522237|ref|XM_013816302.1|	309	4e-160	PREDICTED: Brassica napus uncharacterized LOC106376232 (LOC106376232), mRNA	.	.
BraA01g020730.3C	1.52912	1.99483	2.25452	28.5345	25.4985	28.2674	5.95685	5.78435	9.0208	14.1881	11.3616	10.8682	14.3488	15.6739	18.3905	23.4231	21.7536	28.183	10.5112	8.78079	8.5776	19.2074	20.2403	22.6441	15.8499	10.2549	7.38004	3.85051	4.40994	5.01549	18.1205	24.254	21.8052	10.3333	14.9236	19.6523	BraA01g020730.3C	protein_coding	chrA01:11169091-11169606:-	gi|685261634|ref|XP_009146451.1|	152	3e-10	PREDICTED: leucine-rich repeat extensin-like protein 1 [Brassica rapa]	gi|923510521|ref|XM_013888491.1|	516	0	PREDICTED: Brassica napus proline-rich antigen homolog (LOC106446712), mRNA	.	.
BraA01g020750.3C	26.478	52.2031	26.8461	24.7195	27.8388	26.2203	38.0336	39.3347	42.866	107.456	105.781	107.403	44.8726	50.679	49.0159	36.1269	38.5379	33.7739	27.303	18.8899	18.5815	18.4167	18.7762	20.1246	25.6381	28.8725	27.2007	65.3562	73.2651	73.6751	24.1783	24.0189	22.123	49.0193	48.3027	44.5105	BraA01g020750.3C	protein_coding	chrA01:11192819-11195279:+	gi|685261642|ref|XP_009146493.1|	3255	0	PREDICTED: COBRA-like protein 7 [Brassica rapa]	gi|685261641|ref|XM_009148245.1|	1977	0	PREDICTED: Brassica rapa COBRA-like protein 7 (LOC103870133), mRNA	Q8GZ17	1110
BraA01g020810.3C	31.9761	26.935	33.0713	13.0925	13.4827	13.9335	9.2806	7.43478	7.65502	1.52823	0.913602	1.07507	10.5069	12.2665	9.58533	0.893694	2.3075	4.97858	2.57723	5.57938	3.11818	6.09783	3.24018	3.1359	3.17896	4.10834	2.62809	0.41732	0	0	2.7102	1.79139	2.48954	3.42102	1.37781	0.668021	BraA01g020810.3C	protein_coding	chrA01:11292104-11292517:+	gi|685261654|ref|XP_009146539.1|	733	1e-97	PREDICTED: uncharacterized protein LOC103870183 [Brassica rapa]	gi|923522241|ref|XM_013816313.1|	414	0	PREDICTED: Brassica napus uncharacterized LOC106376242 (LOC106376242), mRNA	.	.
BraA01g020840.3C	0.10077	0.295785	0.411435	0.185977	0.22914	0.0947203	0.196279	0.53605	0.227671	0.311668	0.978184	0.511583	0.319137	0.108096	0.297476	0	0	0	1.1242	1.12328	0.953888	0.214943	0.660805	0.459156	0.648319	0.760279	0.937956	1.88658	3.08261	2.08229	2.47189	2.87703	1.97447	1.43641	0.655648	1.37751	BraA01g020840.3C	protein_coding	chrA01:11319167-11322201:-	gi|922549493|ref|XP_013602736.1|	1036	7e-139	PREDICTED: nudix hydrolase 7-like [Brassica oleracea var. oleracea]	gi|923867578|ref|XM_013853104.1|	280	2e-143	PREDICTED: Brassica napus nudix hydrolase 7-like (LOC106412200), mRNA	Q9SU14	383
BraA01g020960.3C	0.851161	0	0.144801	0.392719	0.483864	0.933409	0	0.150927	0	0.146252	0.459018	0.144038	0	0.152174	0	0	0	0	2.15812	2.15633	0.895234	1.36165	0.310086	0.646384	3.3465	2.44639	2.64085	1.81717	1.70954	1.81467	3.17725	1.80008	2.36265	0.404426	0.153833	0.447509	BraA01g020960.3C	protein_coding	chrA01:11387200-11387817:+	gi|923518234|ref|XP_013656068.1|	1020	7e-139	PREDICTED: uncharacterized protein LOC106360934 [Brassica napus]	gi|923518233|ref|XM_013800614.1|	591	0	PREDICTED: Brassica napus uncharacterized LOC106360934 (LOC106360934), mRNA	.	.
BraA01g020990.3C	14.451	12.4111	13.1117	18.6693	15.6999	18.1114	14.9339	18.1933	18.4107	18.0436	16.7987	19.4823	17.2048	17.5686	18.407	10.2775	14.3252	19.6089	0.977081	0.569493	0.337762	0.513737	0.61421	0.823074	0.774777	0.519186	0.747272	1.66126	1.86055	1.42197	0.428122	0.848941	0.786532	2.28879	0.870595	1.77283	BraA01g020990.3C	protein_coding	chrA01:11404091-11405423:-	gi|923510576|ref|XP_013744127.1|	1918	0	PREDICTED: putative cytochrome P450 71A28 [Brassica napus]	gi|923510575|ref|XM_013888673.1|	1077	0	PREDICTED: Brassica napus putative cytochrome P450 71A28 (LOC106446860), mRNA	P58047	526
BraA01g021000.3C	0.155443	0.152088	0.158665	0	0	0	0	0	0	0	0	0	0	0.166744	0.305915	0	0	0	0.15765	0.315039	0.817457	0.16578	0.169888	0.354136	2.50017	2.178	2.25065	3.82914	4.46691	4.43569	4.31037	0.821847	4.11172	0.886296	0.674248	0.490356	BraA01g021000.3C	protein_coding	chrA01:11411261-11411824:+	gi|922410513|ref|XP_013627051.1|	843	5e-109	PREDICTED: uncharacterized protein LOC106333114 [Brassica oleracea var. oleracea]	gi|923806716|ref|XM_013833904.1|	482	0	PREDICTED: Brassica napus uncharacterized LOC106393174 (LOC106393174), mRNA	O04133	74.3
BraA01g021010.3C	0.255224	0.249717	0.651289	0.235517	0.145089	0	0.124282	0.407304	0.144158	0.263126	0.137639	0	0	0	0.376716	0	0	0	0.776545	0.646586	0	0.408297	0.836827	1.16293	1.9157	0.962798	1.31978	2.38911	3.90374	3.64153	3.94695	3.37352	3.87564	1.45523	0.276765	0.939314	BraA01g021010.3C	protein_coding	chrA01:11411889-11412575:+	gi|674863681|emb|CDY68452.1|	873	7e-116	BnaAnng27320D [Brassica napus]	gi|923597711|ref|XM_013884702.1|	636	0	PREDICTED: Brassica napus uncharacterized LOC106443100 (LOC106443100), mRNA	O04133	62.4
BraA01g021150.3C	45.3021	29.0711	44.6811	81.6335	82.7158	83.0963	20.1248	25.6272	24.9319	44.9397	39.9596	42.8938	64.6687	62.8269	65.5131	102.431	104.174	125.447	9.17665	16.9132	17.876	15.9746	17.974	18.4551	19.9944	24.842	23.4576	6.68673	6.40403	4.81263	22.6256	23.467	20.8434	28.4678	16.5741	16.5859	BraA01g021150.3C	protein_coding	chrA01:11497066-11498499:+	gi|685261724|ref|XP_009146925.1|	2150	0	PREDICTED: UDP-glycosyltransferase 75D1-like [Brassica rapa]	gi|685261723|ref|XM_009148677.1|	1434	0	PREDICTED: Brassica rapa UDP-glycosyltransferase 75D1-like (LOC103870536), mRNA	O23406	697
BraA01g021250.3C	0.483028	1.12244	0.739563	1.72721	1.51024	1.13508	3.05774	3.79001	4.56988	0.684724	1.04196	0.613055	1.33853	1.4249	1.72298	3.1427	2.13825	2.6813	0.979772	1.28489	1.52412	2.31818	1.64974	2.13213	1.16537	0.455539	0.811775	0.773422	1.45523	0.712946	2.06065	2.42615	2.42525	0.975414	0.851168	1.2063	BraA01g021250.3C	protein_coding	chrA01:11583158-11584609:+	gi|685261790|ref|XP_009147295.1|	2574	0	PREDICTED: UDP-glycosyltransferase 84A3-like [Brassica rapa]	gi|685261789|ref|XM_009149047.1|	1452	0	PREDICTED: Brassica rapa UDP-glycosyltransferase 84A3-like (LOC103870867), mRNA	O23401	838
BraA01g021360.3C	1.13056	1.20672	1.01412	2.97171	2.76553	2.99485	2.43566	2.04114	2.32208	5.75714	5.72741	5.04387	15.877	16.5743	15.9793	12.0486	12.3193	16.6011	13.7941	8.60983	8.21559	5.8095	3.14521	3.55132	6.28178	5.68649	6.66111	26.1283	24.1044	25.1821	10.7423	9.09292	9.43137	4.94857	4.86676	4.17885	BraA01g021360.3C	protein_coding	chrA01:11687222-11690442:+	gi|685261817|ref|XP_009147434.1|	2336	0	PREDICTED: BAHD acyltransferase At5g47980-like [Brassica rapa]	gi|685261816|ref|XM_009149186.1|	1311	0	PREDICTED: Brassica rapa BAHD acyltransferase At5g47980-like (LOC103870979), mRNA	Q9FI40	452
BraA01g021390.3C	0	0.291761	0	14.0337	16.9517	22.7039	1.16165	3.48979	3.70546	1.22971	0.64325	0	4.72193	3.83851	9.09628	3.7754	4.87401	3.11585	0.30243	0.60436	0	2.54422	5.21451	7.13331	1.59875	0.321401	0.925194	0	0.829274	0.293423	3.18034	0.945963	1.75284	2.26699	0.646727	1.56781	BraA01g021390.3C	protein_coding	chrA01:11701014-11701307:-	gi|923737950|ref|XP_013670318.1|	395	1e-47	PREDICTED: B-box zinc finger protein 32 [Brassica napus]	gi|685261824|ref|XM_009149221.1|	294	9e-152	PREDICTED: Brassica rapa zinc finger protein CONSTANS-LIKE 14 (LOC103871011), mRNA	Q1G3I2	129
BraA01g021410.3C	0.199748	0.0781752	0.122334	0.0921623	0.158973	0.112654	0.369617	0.255018	0.270777	0.51483	0.323164	0.202815	0.168694	0.299979	0.137588	0.112399	0.244866	0.443524	0.628012	0.384593	0.399174	0.553885	0.611271	0.455076	0.706814	0.495172	0.47514	1.41712	1.38874	1.3169	0.340859	0.591415	0.469661	0.702333	0.649822	0.609119	BraA01g021410.3C	protein_coding	chrA01:11710227-11719965:+	gi|674910223|emb|CDY22932.1|	4096	0	BnaA01g18700D [Brassica napus]	gi|923522294|ref|XM_013816457.1|	1810	0	PREDICTED: Brassica napus disease resistance protein TAO1-like (LOC106376383), mRNA	F4JWM0	593
BraA01g021450.3C	7.20572	32.8031	9.60249	80.2536	77.7154	84.1941	68.812	61.0106	80.7218	101.527	112.8	105.985	411.72	393.029	400.023	532.599	517.73	655.934	159.051	148.677	127.261	155.193	99.9731	97.2443	77.802	65.2597	66.0352	128.986	119.77	122.703	124.776	131.649	114.029	61.9133	43.4105	63.8784	BraA01g021450.3C	protein_coding	chrA01:11747098-11747973:-	gi|674910227|emb|CDY22936.1|	487	5e-56	BnaA01g18740D [Brassica napus]	gi|199580189|gb|AC189495.2|	876	0	Brassica rapa subsp. pekinensis clone KBrB085G17, complete sequence	.	.
BraA01g021510.3C	42.3341	18.0829	38.3746	25.6548	23.7067	29.8446	72.1512	67.5597	62.2772	48.3675	55.0309	39.1348	29.3491	29.4839	27.6679	17.9995	15.4914	35.6933	20.0258	39.5382	46.5199	38.7478	37.9814	37.7873	40.8208	62.8243	57.5054	19.4562	19.9145	24.2479	64.5247	54.6204	59.2713	72.3537	68.1756	73.7496	BraA01g021510.3C	protein_coding	chrA01:11785593-11786147:-	gi|685261839|ref|XP_009147539.1|	598	1e-75	PREDICTED: uncharacterized protein LOC103871066 [Brassica rapa]	gi|685261838|ref|XM_009149291.1|	555	0	PREDICTED: Brassica rapa uncharacterized LOC103871066 (LOC103871066), mRNA	Q9LIE6	58.2
BraA01g021840.3C	2.60045	2.33082	2.17175	7.31642	7.25706	7.6236	3.79001	3.52118	3.9853	9.13023	9.55188	9.26899	5.64398	4.81824	5.15353	7.41872	5.91988	6.86426	4.92432	3.20645	3.57667	7.27287	10.2753	10.8546	7.11726	8.27121	7.71091	6.21774	6.10233	6.20918	5.79902	6.19183	5.50504	14.1359	12.7981	11.607	BraA01g021840.3C	protein_coding	chrA01:12024981-12030377:-	gi|685261967|ref|XP_009148189.1|	6947	0	PREDICTED: myosin-11 [Brassica rapa]	gi|685261974|ref|XM_009149968.1|	4791	0	PREDICTED: Brassica rapa myosin-11 (LOC103871661), transcript variant X5, mRNA	F4JIF4	1868
BraA01g021860.3C	0.197454	2.12512	0.201547	0.72883	0	0.556802	3.07681	5.67199	3.5689	0.814267	0.638904	1.4034	2.91824	2.96534	3.30305	2.49993	0.537897	0	7.81004	1.60074	2.49214	4.00113	4.10026	3.82371	8.04559	4.25639	1.83789	1.55649	1.83038	2.52582	1.47413	2.08794	1.741	5.06626	7.49417	6.22885	BraA01g021860.3C	protein_coding	chrA01:12051944-12052387:-	gi|685261983|ref|XP_009148238.1|	611	1e-78	PREDICTED: uncharacterized protein LOC103871712 [Brassica rapa]	gi|685261982|ref|XM_009149990.1|	425	0	PREDICTED: Brassica rapa uncharacterized LOC103871712 (LOC103871712), mRNA	Q9ZT94	52
BraA01g021870.3C	20.8224	4.35563	19.7883	6.22818	6.77568	6.20919	13.9156	15.2017	13.14	7.18035	10.145	8.96717	3.10773	3.08087	3.53268	0.101007	0.195599	0.0937816	54.6157	48.1676	52.7125	51.0766	39.6293	33.7795	135.043	140.229	136.932	54.7602	50.7182	48.8207	115.863	119.05	114.308	20.9474	24.9157	26.7274	BraA01g021870.3C	protein_coding	chrA01:12057742-12059611:-	gi|685261985|ref|XP_009148250.1|	1355	0	PREDICTED: cytochrome P450 71A16-like [Brassica rapa]	gi|685261984|ref|XM_009150002.1|	880	0	PREDICTED: Brassica rapa cytochrome P450 71A16-like (LOC103871722), mRNA	Q9T0K2	309
BraA01g021910.3C	0	0.357407	0	0.112361	0	0.114454	0	0	0.412654	0.502131	0.26266	0.494531	0.385624	1.04493	0.119817	1.37033	0.99511	1.43134	1.11143	0.863731	1.28068	0.519445	0.665394	1.10963	2.21959	1.96858	1.51115	2.99949	1.6931	2.63592	2.98687	3.60517	2.98227	3.2399	1.84856	4.73738	BraA01g021910.3C	protein_coding	chrA01:12121018-12122153:-	gi|685262006|ref|XP_009148344.1|	970	3e-130	PREDICTED: BI1-like protein [Brassica rapa]	gi|685262005|ref|XM_009150096.1|	714	0	PREDICTED: Brassica rapa BI1-like protein (LOC103871794), mRNA	F4JIE8	288
BraA01g021960.3C	0.499542	0.977524	1.0198	0.460969	1.70386	2.58255	1.94602	1.5944	2.53941	2.06003	3.77153	2.53605	1.31837	1.87551	1.96622	1.75683	0.680417	2.28362	4.55971	2.02486	4.46597	6.92593	6.55157	7.68203	1.87477	0.807622	2.32485	3.69168	4.39917	3.93237	7.72523	7.39522	8.80915	2.37356	1.62511	1.83849	BraA01g021960.3C	protein_coding	chrA01:12169156-12169728:-	gi|674903247|emb|CDY29758.1|	481	5e-60	BnaA01g19080D [Brassica napus]	gi|685262007|ref|XM_009150109.1|	228	5e-115	PREDICTED: Brassica rapa EPIDERMAL PATTERNING FACTOR-like protein 4 (LOC103871800), mRNA	Q2V3I3	136
BraA01g021980.3C	11.4153	15.4579	12.0248	8.93272	9.65611	9.52827	7.91558	9.03579	7.22144	12.616	11.9182	11.1269	8.29092	8.91454	7.189	9.7636	8.70721	7.99166	16.5788	15.5472	16.2327	14.999	13.075	16.5404	10.7716	12.1068	10.2947	26.3655	32.5075	30.9122	11.2007	10.8155	10.1993	15.7945	18.0235	16.2287	BraA01g021980.3C	protein_coding	chrA01:12186239-12188502:+	gi|685262012|ref|XP_009148376.1|	1618	0	PREDICTED: protein TIFY 4B isoform X1 [Brassica rapa]	gi|685262011|ref|XM_009150128.1|	939	0	PREDICTED: Brassica rapa protein TIFY 4B (LOC103871821), transcript variant X1, mRNA	Q8GY55	476
BraA01g022020.3C	0.420478	0.754241	0.572259	0.646683	0.717093	0.592854	1.77452	1.7894	2.61248	2.96221	2.34316	1.35195	2.51534	2.70629	2.41357	1.9717	1.71818	2.47138	2.34546	0.710159	1.91642	1.56955	1.60843	1.03778	3.08094	2.87025	1.30459	2.83117	4.48246	3.51686	1.7938	1.7044	2.54029	5.66068	4.40767	4.20036	BraA01g022020.3C	protein_coding	chrA01:12212349-12215722:+	gi|674903242|emb|CDY29753.1|	2204	0	BnaA01g19130D [Brassica napus]	gi|685262021|ref|XM_009150181.1|	1198	0	PREDICTED: Brassica rapa alpha-amylase 1 (LOC103871863), mRNA	Q8VZ56	731
BraA01g022030.3C	9.46275	18.0633	7.10215	12.4132	11.3915	9.2435	13.7333	11.7454	11.9473	10.1383	11.6071	9.79642	4.70094	4.47826	4.19929	1.30508	4.67544	1.6964	14.6779	9.7772	11.9042	5.4418	5.88081	6.02369	7.36134	15.8986	13.3365	44.6096	41.0214	41.5357	3.85881	5.19929	4.81707	30.5036	20.0198	16.779	BraA01g022030.3C	protein_coding	chrA01:12228673-12229688:+	gi|685262024|ref|XP_009148440.1|	1607	0	PREDICTED: uncharacterized protein LOC103871872 [Brassica rapa]	gi|685262023|ref|XM_009150192.1|	945	0	PREDICTED: Brassica rapa uncharacterized LOC103871872 (LOC103871872), mRNA	.	.
BraA01g022120.3C	0.555876	0.466183	0.5674	0.549593	0.812576	0.783759	1.58544	1.77421	1.61473	5.52617	5.26748	5.07969	2.6826	3.06664	2.73494	1.17297	0.432657	1.97069	0.48323	0.563303	0.375853	0.21173	0.477348	0.497523	0.298027	0.385157	0.615958	1.36933	1.141	0.976749	0.465816	0.2939	0.505689	1.13195	0.947245	0.876778	BraA01g022120.3C	protein_coding	chrA01:12308908-12311487:-	gi|685262052|ref|XP_009148596.1|	3279	0	PREDICTED: receptor-like protein 12 [Brassica rapa]	gi|685262051|ref|XM_009150348.1|	2021	0	PREDICTED: Brassica rapa receptor-like protein 12 (LOC103872004), mRNA	F4JTU7	672
BraA01g022190.3C	3.38339	2.20692	2.97952	2.47934	2.82849	1.90193	3.42431	4.0584	2.8853	3.48813	3.50611	3.16589	2.066	1.95702	2.05633	3.77969	3.47893	3.20603	1.17745	1.88237	1.60485	1.2028	1.45012	1.77591	1.28045	1.25131	1.09777	1.96107	1.62968	1.92574	0.742921	0.771659	0.877416	1.8913	1.83447	0.976631	BraA01g022190.3C	protein_coding	chrA01:12384300-12387628:+	gi|685262062|ref|XP_009148642.1|	4170	0	PREDICTED: chloroplastic group IIA intron splicing facilitator CRS1, chloroplastic [Brassica rapa]	gi|685262061|ref|XM_009150394.1|	2643	0	PREDICTED: Brassica rapa chloroplastic group IIA intron splicing facilitator CRS1, chloroplastic (LOC103872052), mRNA	F4JVH1	1183
BraA01g022200.3C	32.6511	76.9736	31.2286	21.8264	18.5126	20.2996	62.9303	67.1053	63.9916	99.0421	101.952	101.807	25.6027	28.8658	24.3709	54.974	50.1932	24.4014	5.64949	3.3869	3.42517	3.38172	4.58946	5.5644	3.49193	3.32522	3.63385	19.1686	19.2249	18.7206	3.47319	3.08108	3.69416	21.7441	10.5942	8.65097	BraA01g022200.3C	protein_coding	chrA01:12388007-12389979:-	gi|674903228|emb|CDY29739.1|	1637	0	BnaA01g19270D [Brassica napus]	gi|685262087|ref|XM_009150557.1|	929	0	PREDICTED: Brassica rapa uncharacterized LOC103872218 (LOC103872218), mRNA	Q9NQZ5	70.9
BraA01g022350.3C	1.01941	1.16365	1.21397	1.09748	2.31805	1.59703	0.82734	0.723044	1.72739	1.57646	2.19902	0.517532	1.43488	0.182255	0.668744	3.34616	4.397	3.3287	12.579	14.4625	11.2581	12.8653	10.5844	11.8059	6.55858	3.1131	4.21717	8.53809	7.71739	7.02169	8.51665	9.3423	5.82582	7.10411	7.55393	8.39687	BraA01g022350.3C	protein_coding	chrA01:12501382-12502078:-	gi|685262122|ref|XP_009148954.1|	845	2e-113	PREDICTED: uncharacterized protein LOC103872349 [Brassica rapa]	gi|923544394|ref|XM_013878946.1|	516	0	PREDICTED: Brassica napus uncharacterized LOC106437925 (LOC106437925), mRNA	.	.
BraA01g022380.3C	0.489774	0.159735	0.166643	0.527282	0.185616	0.61383	0	0.0868461	0	0.925717	0.35217	0.331529	0.689384	0.437819	0.40162	0	0	0.319853	3.64267	4.54958	4.89378	4.87524	4.46074	4.83524	5.86445	4.48704	5.90953	3.53906	3.32945	2.89161	5.65887	5.26533	3.9186	1.86172	1.59333	2.06004	BraA01g022380.3C	protein_coding	chrA01:12509429-12510652:+	gi|685262128|ref|XP_009148992.1|	1760	0	PREDICTED: probable protein phosphatase 2C 47 [Brassica rapa]	gi|685262127|ref|XM_009150744.1|	1074	0	PREDICTED: Brassica rapa probable protein phosphatase 2C 47 (LOC103872371), mRNA	Q9SD02	607
BraA01g022480.3C	0.349281	1.82264	0.950726	3.11567	1.19135	2.29819	4.64893	5.4502	5.39245	0.960251	1.38132	1.53679	1.84362	3.1223	2.63501	8.5168	12.0523	7.29927	1.65312	0.707896	0.612279	1.36587	0.890726	1.061	1.24842	0.501948	0.963283	2.29443	0.971341	0.687382	0.49669	0.36934	0.228126	1.21704	2.39882	1.71397	BraA01g022480.3C	protein_coding	chrA01:12565292-12566124:-	gi|923660571|ref|XP_013647407.1|	768	2e-96	PREDICTED: protein POLLENLESS 3-LIKE 2-like isoform X1 [Brassica napus]	gi|923660572|ref|XM_013791954.1|	337	3e-175	PREDICTED: Brassica napus protein POLLENLESS 3-LIKE 2-like (LOC106352295), transcript variant X2, mRNA	Q9SD20	259
BraA01g022500.3C	0.724542	4.13529	0.862823	7.35455	8.51227	8.96712	2.94013	3.98272	5.59299	7.59422	7.16347	5.6401	7.64874	4.92239	6.06014	15.7984	11.8426	5.67805	6.98088	4.65008	3.68329	12.3636	12.538	11.5548	2.97816	3.12369	2.37288	2.73673	5.03733	4.51533	6.05315	5.74614	6.74337	2.06558	2.74993	2.41261	BraA01g022500.3C	protein_coding	chrA01:12571429-12572274:+	gi|685262173|ref|XP_009149224.1|	1239	5e-171	PREDICTED: uncharacterized protein LOC103872549 [Brassica rapa]	gi|685262172|ref|XM_009150976.1|	726	0	PREDICTED: Brassica rapa uncharacterized LOC103872549 (LOC103872549), mRNA	.	.
BraA01g022530.3C	6.3951	6.81153	7.93237	14.0436	12.425	13.8486	8.43566	8.61244	7.13285	28.876	25.0582	29.0143	18.2023	17.6277	18.082	19.3592	20.7292	12.7935	7.9637	7.1368	4.68283	2.24469	2.21183	2.39753	5.29491	4.62425	4.52089	14.9958	13.6574	15.3734	6.4752	5.39277	7.0583	2.53859	3.42354	2.12805	BraA01g022530.3C	protein_coding	chrA01:12586889-12587971:+	gi|685262175|ref|XP_009149246.1|	1937	0	PREDICTED: GDP-mannose 4,6 dehydratase 2-like [Brassica rapa]	gi|685262174|ref|XM_009150998.1|	1083	0	PREDICTED: Brassica rapa GDP-mannose 4,6 dehydratase 2-like (LOC103872569), mRNA	P93031	701
BraA01g022630.3C	0.653032	1.43762	0.999856	2.41043	2.78425	1.91822	2.06696	1.73692	2.95082	1.3465	1.49672	1.07747	2.2405	1.83884	2.0081	7.69376	8.89484	7.8897	0.248364	0.744477	0.429279	1.13175	2.31958	1.67374	0.0875292	0.351925	0.422109	2.413	1.36205	1.28516	1.48001	1.38107	1.03963	1.78415	1.77037	1.20169	BraA01g022630.3C	protein_coding	chrA01:12666278-12667833:-	gi|685262189|ref|XP_009149316.1|	1340	0	PREDICTED: protein SHI RELATED SEQUENCE 1-like [Brassica rapa]	gi|685262188|ref|XM_009151068.1|	1071	0	PREDICTED: Brassica rapa protein SHI RELATED SEQUENCE 1-like (LOC103872632), mRNA	Q9SD40	404
BraA01g022660.3C	4.93725	18.4089	8.30854	13.5449	15.1714	13.17	11.3062	13.3449	15.2248	6.74094	8.20364	7.45183	11.692	7.87275	10.6358	24.5909	27.6268	27.0147	16.1047	13.1165	14.1752	14.8006	22.0218	21.1285	10.159	6.18439	5.24418	6.17977	6.80333	9.71647	10.1045	9.73607	9.54325	11.0322	14.4702	16.2765	BraA01g022660.3C	protein_coding	chrA01:12709846-12711174:+	gi|674875286|emb|CDY57635.1|	961	2e-129	BnaAnng14790D [Brassica napus]	gi|923535839|ref|XM_013859853.1|	456	0	PREDICTED: Brassica napus thioredoxin domain-containing protein PLP3A-like (LOC106419089), mRNA	Q8LCV1	348
BraA01g022690.3C	0	0.0257591	0.026873	0	0	0	0.0256401	0	0	0.0542845	0.113583	0.0267314	0.0277927	0	0	0	0	0.0687732	0	0.0533579	0.0553809	0.252703	0.115095	0.0899697	0.112921	0.170255	0.163368	0.233474	0.366076	0.284964	0.0842359	0.0278391	0.0515851	0.150111	0.256943	0.359889	BraA01g022690.3C	protein_coding	chrA01:12719643-12723297:-	gi|923518310|ref|XP_013656461.1|	5102	0	PREDICTED: disease resistance protein TAO1-like [Brassica napus]	gi|923518309|ref|XM_013801007.1|	3057	0	PREDICTED: Brassica napus disease resistance protein TAO1-like (LOC106361276), mRNA	F4J339	945
BraA01g022710.3C	1.29218	3.01486	1.62335	1.00896	1.46915	1.12118	2.2265	4.01855	2.47031	1.53714	1.60813	1.41294	1.9937	1.70601	1.27152	3.63557	3.24934	1.68775	3.42754	1.91381	3.24091	1.90816	2.28135	2.15132	1.06583	1.49987	1.02799	2.64445	2.02711	2.44519	1.37815	1.5766	2.14236	8.12338	6.79064	5.1215	BraA01g022710.3C	protein_coding	chrA01:12731812-12737839:-	gi|674927413|emb|CDY05894.1|	245	1e-20	BnaC08g20710D [Brassica napus]	gi|923682666|ref|XM_013798597.1|	444	0	PREDICTED: Brassica napus uncharacterized protein At3g43530-like (LOC106358797), mRNA	.	.
BraA01g023110.3C	0	0.492976	0	0.697415	0.859276	0.236801	0	0.804075	0	1.03889	0.271718	0.511583	0	0	0.495793	0	0.343141	0.329044	0.511002	0.25529	0	0.806035	1.65201	0	0.270133	0.543056	0.78163	4.71644	3.7365	4.21417	1.34342	1.59835	1.23404	6.94265	5.19055	3.97358	BraA01g023110.3C	protein_coding	chrA01:13098871-13099218:+	gi|685262981|ref|XP_009102397.1|	480	8e-60	PREDICTED: uncharacterized protein LOC103828540 [Brassica rapa]	gi|923654616|ref|XM_013790149.1|	348	0	PREDICTED: Brassica napus uncharacterized LOC106350241 (LOC106350241), mRNA	.	.
BraA01g023420.3C	333.861	138.377	337.406	240.919	243.548	246.961	188.484	212.65	202.745	283.657	330.357	297.838	321.014	340.39	348.598	27.5359	28.9145	59.7743	196.283	330.779	324.182	266.975	194.044	195.65	503.141	451.362	445.077	339.565	342.965	344.795	532.196	527.365	491.297	131.255	115.996	152.485	BraA01g023420.3C	protein_coding	chrA01:13328302-13328959:-	gi|297816234|ref|XP_002876000.1|	187	5e-16	predicted protein [Arabidopsis lyrata subsp. lyrata]	gi|685262811|ref|XM_009103228.1|	318	4e-165	PREDICTED: Brassica rapa cysteine-rich and transmembrane domain-containing protein A (LOC103827692), mRNA	.	.
BraA01g023460.3C	4.60537	3.68672	4.01709	3.47708	3.61766	4.09279	1.79407	2.4944	3.2161	2.50346	2.7997	2.21051	1.94469	1.97608	1.89509	0.35338	1.25458	1.74987	6.11445	7.46705	8.63085	7.94795	4.66729	7.4399	5.65654	3.51975	4.32995	1.98018	2.6391	1.64788	5.17967	3.36463	4.67592	3.89903	3.99526	3.78609	BraA01g023460.3C	protein_coding	chrA01:13364752-13365798:+	gi|685262800|ref|XP_009101417.1|	1731	0	PREDICTED: protein PHLOEM PROTEIN 2-LIKE A10 [Brassica rapa]	gi|685262799|ref|XM_009103169.1|	1047	0	PREDICTED: Brassica rapa protein PHLOEM PROTEIN 2-LIKE A10 (LOC103827642), mRNA	Q9SY57	283
BraA01g023480.3C	176.574	177.194	183.175	342.591	354.247	357.483	175.172	179.977	197.144	368.748	395.544	376.54	810.354	788.553	809.623	423.837	459.152	691.345	275.509	233.989	254.982	388.925	361.224	395.715	587.429	624.178	635.96	137.487	142.697	127.172	840.2	916.598	826.23	628.555	651.646	618.908	BraA01g023480.3C	protein_coding	chrA01:13380079-13380774:-	gi|685262798|ref|XP_009101405.1|	363	2e-43	PREDICTED: phytosulfokines 3 [Brassica rapa]	gi|923511039|ref|XM_013890079.1|	213	6e-107	PREDICTED: Brassica napus phytosulfokines 3-like (LOC106448152), mRNA	Q9M2Y0	114
BraA01g023500.3C	0.295184	0.577628	1.20521	0.272391	1.00683	0.277464	0.57496	1.2562	0.666915	0.304322	1.27351	0.899147	0.934846	2.21651	0.290464	5.39827	3.61858	1.92773	4.79	3.58953	3.10469	2.51852	2.58092	2.35375	1.5826	0.636308	0.915849	3.78118	4.65175	4.64735	0.629642	1.24854	1.15676	1.96358	8.00244	4.34551	BraA01g023500.3C	protein_coding	chrA01:13410056-13411557:-	.	.	.	.	gi|685262790|ref|XR_625141.1|	45	2e-13	PREDICTED: Brassica rapa uncharacterized LOC103827528 (LOC103827528), transcript variant X23, misc_RNA	.	.
BraA01g023560.3C	24.3965	23.6984	20.4235	34.7409	37.1166	35.3054	41.4515	40.054	40.2492	81.1553	78.4668	78.6794	69.0186	65.4257	67.0973	44.5666	45.0638	37.2521	0.0890033	0	0	0.187187	0	0	0.0941004	0	0	0.345887	0.976203	0.172706	0	0.0927971	0	0.0833952	0	0.0922792	BraA01g023560.3C	protein_coding	chrA01:13447439-13451097:-	gi|685262746|ref|XP_009152196.1|	1787	0	PREDICTED: probable 2-oxoglutarate-dependent dioxygenase At3g49630 [Brassica rapa]	gi|685262745|ref|XM_009153948.1|	999	0	PREDICTED: Brassica rapa probable 2-oxoglutarate-dependent dioxygenase At3g49630 (LOC103875428), mRNA	F4IY03	595
BraA01g023580.3C	6.45629	6.31697	5.89644	6.89846	4.63609	4.79109	8.60434	8.31501	7.67728	5.95551	6.59705	6.21039	8.60928	8.01922	8.69367	15.2967	14.8109	11.0957	12.062	9.98599	13.5812	10.1473	9.65595	18.9669	3.27929	1.09874	2.81144	5.35723	6.9299	6.68732	4.71134	6.10843	4.32775	3.87497	3.68484	3.21582	BraA01g023580.3C	protein_coding	chrA01:13466537-13466873:+	.	.	.	.	gi|922417403|ref|XM_013748798.1|	127	5e-59	PREDICTED: Brassica oleracea var. oleracea uncharacterized LOC106311514 (LOC106311514), transcript variant X13, mRNA	.	.
BraA01g023740.3C	1.69246	0.55198	1.03653	2.29061	2.43738	3.07567	1.31863	1.92067	1.27461	3.48972	2.9207	2.63495	2.73957	1.69448	1.55438	2.53961	2.61264	2.80005	2.17422	1.25772	2.13612	2.52703	2.58964	2.05645	4.35551	6.32377	4.31757	8.00482	4.6021	6.88355	7.22022	7.39726	6.19022	6.2189	6.85182	7.35597	BraA01g023740.3C	protein_coding	chrA01:13619725-13620882:+	gi|685262697|ref|XP_009151976.1|	1296	4e-179	PREDICTED: probable 6-phosphogluconolactonase 2 [Brassica rapa]	gi|923674897|ref|XM_013796359.1|	777	0	PREDICTED: Brassica napus probable 6-phosphogluconolactonase 2 (LOC106356629), transcript variant X1, mRNA	Q8LG70	457
BraA01g023770.3C	0.254853	0.166236	0.260137	0	0	0	1.15828	0.994186	0.671762	3.32808	2.19902	2.32889	1.43488	1.18466	0.668744	1.07555	1.27282	3.43966	0.258472	0.172172	0.5361	0.0906008	0.278537	0.290309	0.0910914	0.366247	0.0878576	1.75784	1.96872	2.17338	0.271808	0.269489	0.083226	1.1302	0.644847	0.446642	BraA01g023770.3C	protein_coding	chrA01:13673348-13674535:+	gi|685262692|ref|XP_009151947.1|	1672	0	PREDICTED: zingipain-2 [Brassica rapa]	gi|923510842|ref|XM_013889639.1|	1032	0	PREDICTED: Brassica napus zingipain-2-like (LOC106447662), mRNA	A2XQE8	311
BraA01g023800.3C	0.0966056	1.74864	0.59165	2.58524	2.96557	3.35983	1.41126	1.85004	1.52784	8.81427	9.22133	9.1713	4.99718	3.52339	5.08577	5.70782	4.67126	4.10081	1.66561	0.440533	0.558843	1.59697	2.63958	2.47603	2.07176	0.416493	0.399643	2.9985	2.6418	2.28143	3.5031	3.21784	3.50182	0.137706	0.733314	1.8285	BraA01g023800.3C	protein_coding	chrA01:13700574-13704381:-	gi|923510854|ref|XP_013745125.1|	2852	0	PREDICTED: probable pectinesterase/pectinesterase inhibitor 34 [Brassica napus]	gi|685262687|ref|XM_009153665.1|	1809	0	PREDICTED: Brassica rapa probable pectinesterase/pectinesterase inhibitor 34 (LOC103875179), mRNA	Q9M3B0	940
BraA01g023820.3C	0	0	0	0	0	0	0	0	0	0	0	0	0	0	0	0	0	0	0	0.132204	0.548864	0	0.285169	0.297221	0.419671	0.281225	0.134924	0.514198	0.725615	0.385118	0	0	0.127811	0.743856	1.69766	0.685915	BraA01g023820.3C	protein_coding	chrA01:13713110-13714022:+	gi|685360114|ref|XP_009114584.1|	685	6e-83	PREDICTED: ATPase family gene 2 protein [Brassica rapa]	gi|923768827|ref|XM_013823482.1|	348	0	PREDICTED: Brassica napus uncharacterized LOC106383368 (LOC106383368), mRNA	.	.
BraA01g023840.3C	23.5082	6.28345	20.4473	9.84067	10.048	7.58718	4.64778	4.26246	3.26129	10.5083	12.8365	12.3234	11.5065	10.1122	10.3197	4.14414	4.17304	8.46492	15.9544	20.9564	20.5735	10.3051	7.72715	7.91951	12.8248	16.6377	17.8535	12.4818	13.4902	15.1894	18.7255	17.9428	18.8171	7.2226	7.79463	6.19536	BraA01g023840.3C	protein_coding	chrA01:13732328-13737083:+	gi|685262683|ref|XP_009151884.1|	2589	0	PREDICTED: O-acyltransferase WSD1-like [Brassica rapa]	gi|685262682|ref|XM_009153636.1|	1413	0	PREDICTED: Brassica rapa O-acyltransferase WSD1-like (LOC103875156), mRNA	Q93ZR6	393
BraA01g023870.3C	0.268807	0.225434	0.0783943	0.141743	0.13098	0.252671	0.224393	0.163421	0	0.435488	0.207091	0.311925	0.121616	0.0823859	0.0755742	4.59178	3.76599	2.80877	0.0389463	0.116742	0.201947	0.0819098	0	0.13123	0	0.206946	0.0794297	0.0378385	0	0.0377865	0.0409557	0.0406064	0.0376212	0.547384	0.832842	0.646076	BraA01g023870.3C	protein_coding	chrA01:13755316-13758872:+	gi|685262673|ref|XP_009151832.1|	3594	0	PREDICTED: plastidial pyruvate kinase 4, chloroplastic [Brassica rapa]	gi|685262676|ref|XM_009153599.1|	2171	0	PREDICTED: Brassica rapa plastidial pyruvate kinase 4, chloroplastic (LOC103875118), transcript variant X3, mRNA	Q9M3B6	1041
BraA01g023880.3C	12.0449	15.6011	11.6799	10.0033	10.4339	11.0523	12.1495	12.0824	13.801	7.68719	8.19686	7.77466	9.71818	9.44435	9.08678	16.3794	16.328	12.9603	0.872565	0.668414	0.603266	0.795225	0.908958	0.882038	1.16854	1.32913	1.21604	1.18684	0.930458	0.903018	0.489379	0.485204	0.365247	1.22638	1.11956	1.11577	BraA01g023880.3C	protein_coding	chrA01:13763901-13768717:+	gi|685262671|ref|XP_009151820.1|	3608	0	PREDICTED: putative pentatricopeptide repeat-containing protein At3g49142 [Brassica rapa]	gi|685262670|ref|XM_009153572.1|	2014	0	PREDICTED: Brassica rapa putative pentatricopeptide repeat-containing protein At3g49142 (LOC103875111), mRNA	P0C899	1226
BraA01g024160.3C	5.15703	5.28602	6.89326	22.6611	19.2651	20.1977	11.8984	14.4351	13.732	20.6971	20.461	18.7631	37.331	38.9872	36.6699	36.878	36.7104	48.0321	7.16047	6.9057	6.19893	21.4762	20.6663	20.4209	18.0376	11.4475	12.0003	7.38026	9.44722	8.27627	16.8277	18.1124	19.0665	19.3694	21.304	24.0151	BraA01g024160.3C	protein_coding	chrA01:13999927-14004702:+	gi|674950396|emb|CDX83042.1|	2560	0	BnaA01g20420D [Brassica napus]	gi|685262583|ref|XM_009153227.1|	1425	0	PREDICTED: Brassica rapa non-specific phospholipase C6-like (LOC103874784), mRNA	Q8H965	948
BraA01g024310.3C	1.40185	0.738554	1.21077	3.48278	2.94246	3.24356	0.525101	1.37672	0.36545	1.44525	0.930458	1.53286	2.50442	3.23889	2.33443	0.758486	1.17504	0.845073	3.8278	3.93392	4.3099	13.2257	18.8569	15.2318	8.09403	5.46262	5.5762	1.27506	1.99923	1.69774	12.5359	14.8236	14.8959	10.3499	8.88713	6.91686	BraA01g024310.3C	protein_coding	chrA01:14166707-14167519:+	gi|685262565|ref|XP_009151376.1|	1276	9e-175	PREDICTED: uncharacterized protein LOC103874689 [Brassica rapa]	gi|923868321|ref|XM_013853315.1|	813	0	PREDICTED: Brassica napus uncharacterized LOC106412396 (LOC106412396), mRNA	.	.
BraA01g024420.3C	2.19407	3.60833	2.57311	13.0095	13.2689	13.5589	6.36497	5.86058	7.3302	9.72178	8.50919	8.53184	5.47019	6.25955	7.21196	24.4952	22.4456	22.0722	7.00709	4.73061	3.53517	18.5208	27.7552	25.9504	12.7644	8.70451	9.26968	5.42783	6.01511	5.00695	12.9449	13.7724	14.1777	15.3049	16.756	16.3953	BraA01g024420.3C	protein_coding	chrA01:14254844-14257028:+	gi|685262548|ref|XP_009151299.1|	3113	0	PREDICTED: BTB/POZ domain-containing protein SETH6 [Brassica rapa]	gi|685262547|ref|XM_009153051.1|	1073	0	PREDICTED: Brassica rapa BTB/POZ domain-containing protein SETH6 (LOC103874619), mRNA	O82253	1016
BraA01g024550.3C	8.71852	24.8013	4.44963	17.2825	17.9894	16.8456	28.775	27.8272	28.0878	8.15617	8.70698	6.88518	15.1693	10.9111	8.57913	109.248	95.2227	67.0595	27.6732	10.4711	8.83034	31.3389	65.4659	62.1636	14.7155	9.57099	8.18192	15.2725	18.7083	12.0741	29.4453	27.6576	30.686	28.8446	24.6864	41.5945	BraA01g024550.3C	protein_coding	chrA01:14396658-14397832:+	gi|674858433|emb|CDY70048.1|	381	3e-43	BnaC01g42710D, partial [Brassica napus]	gi|685262499|ref|XR_634153.1|	216	4e-108	PREDICTED: Brassica rapa uncharacterized LOC103874232 (LOC103874232), transcript variant X5, ncRNA	Q9ZU97	57.4
BraA01g024750.3C	1.52769	0.578602	1.55936	2.50113	1.62485	2.77932	2.49569	2.41177	2.7835	11.5329	14.0322	12.209	8.06364	8.4581	9.84395	4.50615	3.9603	5.79295	3.9984	2.29718	2.4361	1.89208	2.26211	1.8525	4.22738	1.85903	2.65025	6.55538	6.03007	6.69183	3.9419	5.62792	5.21419	9.27248	7.80217	11.0894	BraA01g024750.3C	protein_coding	chrA01:14504388-14506444:+	gi|685262476|ref|XP_009150821.1|	3089	0	PREDICTED: senescence-associated carboxylesterase 101 [Brassica rapa]	gi|685262475|ref|XM_009152573.1|	1779	0	PREDICTED: Brassica rapa senescence-associated carboxylesterase 101 (LOC103874154), mRNA	Q9SU71	745
BraA01g024760.3C	7.07406	2.10029	8.16688	10.4896	10.7608	10.8683	17.1523	18.3223	18.2422	34.051	33.1505	32.644	88.3266	80.5415	85.4038	11.6673	11.6955	19.2439	3.85939	3.75732	2.97614	3.90234	3.83907	4.22362	2.45871	2.10332	1.96778	7.83573	6.91939	6.28876	3.64226	3.25007	4.34943	7.41786	8.35887	9.49059	BraA01g024760.3C	protein_coding	chrA01:14512916-14514889:+	gi|685262472|ref|XP_009150805.1|	3127	0	PREDICTED: senescence-associated carboxylesterase 101-like [Brassica rapa]	gi|685262471|ref|XM_009152557.1|	1728	0	PREDICTED: Brassica rapa senescence-associated carboxylesterase 101-like (LOC103874137), mRNA	Q9SU71	685
BraA01g024870.3C	2.87756	0.406678	3.62256	2.1833	2.14474	2.37423	1.12098	1.53073	1.3725	10.8118	10.7938	10.8753	3.64529	2.98388	3.42932	2.15895	0.914543	1.54514	2.20502	2.3328	1.88319	0.784282	0.733826	0.327789	1.19993	1.44736	0.958936	1.70124	1.83759	2.45397	0.988897	1.35236	1.37824	0.486138	0.554742	0.97499	BraA01g024870.3C	protein_coding	chrA01:14596676-14601259:-	gi|685262449|ref|XP_009150699.1|	4762	0	PREDICTED: ABC transporter A family member 7-like isoform X1 [Brassica rapa]	gi|685262451|ref|XM_009152458.1|	1578	0	PREDICTED: Brassica rapa ABC transporter A family member 7-like (LOC103874043), transcript variant X2, mRNA	Q9STT5	1501
BraA01g024940.3C	2.39997	0.828771	2.01742	0.260548	0.321018	0.1327	0.274981	0	0.956878	0.727727	0.761335	0.716711	0.745167	1.06007	0.694589	0	0	0.368784	0	1.43061	0.148485	0.301127	0	0	0.151379	0.304321	0.146005	1.80839	0.392603	0.694577	0	0	0	0.53663	0.15309	0	BraA01g024940.3C	protein_coding	chrA01:14629057-14629939:+	gi|923874267|ref|XP_013710568.1|	973	1e-131	PREDICTED: high-affinity nitrate transporter 3.1-like [Brassica napus]	gi|923874266|ref|XM_013855114.1|	615	0	PREDICTED: Brassica napus high-affinity nitrate transporter 3.1-like (LOC106414455), mRNA	Q9FGS5	265
BraA01g025010.3C	0.297185	0	0.151673	0.0914125	0.0563141	0.18623	0.0482381	0	0	0.0510642	0.0534225	0	0.156864	0	0	0	0	0	8.9919	13.1003	13.0239	9.61413	9.96061	9.02747	15.5084	12.1718	12.8064	19.4733	20.3861	21.9809	19.4928	17.1267	18.0513	3.81258	3.86721	4.42706	BraA01g025010.3C	protein_coding	chrA01:14744224-14746884:+	gi|685262431|ref|XP_009150614.1|	2877	0	PREDICTED: LOW QUALITY PROTEIN: lysosomal beta glucosidase-like [Brassica rapa]	gi|685262430|ref|XM_009152366.1|	1171	0	PREDICTED: Brassica rapa lysosomal beta glucosidase-like (LOC103873953), mRNA	A7LXU3	261
BraA01g025090.3C	2.47954	0.0866442	1.71743	0.980607	1.91297	1.16535	0.948683	0.376859	0.700261	1.64334	0.955129	1.88821	1.77621	0.949935	0.871393	0	0	0.115664	1.07775	0.628168	0.931406	0.566667	0.193569	1.10963	1.42434	1.52714	1.8317	0.43629	0.656718	0.697103	1.4167	1.68553	1.38811	0	0.192058	0	BraA01g025090.3C	protein_coding	chrA01:14839738-14840727:-	gi|685262402|ref|XP_009150479.1|	1700	0	PREDICTED: receptor like protein kinase S.3 [Brassica rapa]	gi|685262401|ref|XM_009152231.1|	990	0	PREDICTED: Brassica rapa receptor like protein kinase S.3 (LOC103873825), mRNA	Q9STF0	623
BraA01g025110.3C	1.33625	0.227376	1.00814	0.107223	0.330272	0.382271	0.452652	0.494487	0.131262	0.419275	0.313313	0.353938	0.429323	0.685539	0.686027	0	0.079134	0.0758829	6.01011	9.00773	7.08831	3.59377	4.44478	4.63263	17.3186	19.9754	19.7681	16.7733	16.2107	16.8646	5.39077	6.32773	5.57796	21.311	20.4124	14.7841	BraA01g025110.3C	protein_coding	chrA01:14852381-14853889:+	gi|685262398|ref|XP_009150457.1|	2438	0	PREDICTED: probable mitochondrial chaperone BCS1-B [Brassica rapa]	gi|685262397|ref|XM_009152209.1|	1509	0	PREDICTED: Brassica rapa probable mitochondrial chaperone BCS1-B (LOC103873807), mRNA	Q9FLD5	773
BraA01g025150.3C	61.7161	46.5879	70.8179	18.575	16.148	18.7288	29.2566	28.1557	27.0101	46.9826	42.6502	48.5539	23.4071	22.2504	25.2369	43.5535	42.5879	46.8439	22.7986	19.0521	19.452	14.0577	13.5126	12.105	27.172	17.6208	15.2172	26.6808	28.1315	29.962	5.44883	6.80696	6.90718	26.1199	21.6066	36.2086	BraA01g025150.3C	protein_coding	chrA01:14865984-14866841:-	gi|685262392|ref|XP_009150431.1|	1380	0	PREDICTED: transcription factor LUX [Brassica rapa]	gi|685262391|ref|XM_009152183.1|	858	0	PREDICTED: Brassica rapa transcription factor LUX (LOC103873783), mRNA	Q9SNB4	424
BraA01g025220.3C	0	0	0	0	0	0	0	0	0	0	0	0	0	0	0	0	0	0	1.09771	3.5646	1.70758	5.48303	7.39326	6.16459	2.031	0.874924	1.39921	0.799864	2.00664	3.72756	2.0201	2.289	3.97635	6.17125	2.6408	3.1298	BraA01g025220.3C	protein_coding	chrA01:14907373-14908826:-	gi|923921276|ref|XP_013729883.1|	226	3e-20	PREDICTED: uncharacterized protein LOC106433602 [Brassica napus]	gi|685262388|ref|XR_634062.1|	167	4e-81	PREDICTED: Brassica rapa uncharacterized LOC103873749 (LOC103873749), transcript variant X7, ncRNA	.	.
BraA01g025360.3C	104.616	92.8836	93.9879	223.074	214.687	218.613	218.001	215.797	215.654	302.972	303.256	296.982	231.648	224.536	225.369	58.3809	63.2395	73.628	120.92	83.8469	78.9325	54.7722	51.8771	54.1681	72.498	51.2529	52.1302	111.773	113.087	118.085	73.0311	75.7908	70.812	17.6647	20.3451	22.274	BraA01g025360.3C	protein_coding	chrA01:15039392-15041461:-	gi|685262363|ref|XP_009150321.1|	1713	0	PREDICTED: probable iron/ascorbate oxidoreductase DDB_G0283291 [Brassica rapa]	gi|685262362|ref|XM_009152073.1|	1014	0	PREDICTED: Brassica rapa probable iron/ascorbate oxidoreductase DDB_G0283291 (LOC103873673), mRNA	C8VK14	169
BraA01g025380.3C	0.0669489	0	0.0341684	0.0308897	0	0	0	0	0	0	0.0722091	0.0339884	0.0353378	0	0.0329393	0	0	0	0.746894	0.814121	0.704155	0.678313	0.585364	0.571972	2.01006	1.65965	1.76561	3.66123	3.84778	3.72207	2.74901	3.07953	3.7058	1.62234	1.81499	1.83036	BraA01g025380.3C	protein_coding	chrA01:15076528-15080413:+	gi|685262358|ref|XP_009150298.1|	4445	0	PREDICTED: probable LRR receptor-like serine/threonine-protein kinase MEE39 isoform X3 [Brassica rapa]	gi|685262357|ref|XM_009152050.1|	2597	0	PREDICTED: Brassica rapa probable LRR receptor-like serine/threonine-protein kinase MEE39 (LOC103873634), transcript variant X3, mRNA	C0LGP2	1389
BraA01g025470.3C	7.40321	7.62469	7.95441	4.67423	2.65803	6.22628	9.86631	9.53454	7.48279	16.8716	15.5495	22.9462	13.574	13.3751	14.1863	7.67385	7.96088	26.4639	20.5491	24.0858	16.3927	15.3756	17.0341	21.3048	29.2464	38.2167	43.9241	57.9742	58.8748	77.0647	33.2451	29.2534	35.8826	82.9416	85.7733	90.1383	BraA01g025470.3C	protein_coding	chrA01:15170100-15170324:-	gi|685262339|ref|XP_009150216.1|	376	2e-45	PREDICTED: uncharacterized protein LOC103873559 [Brassica rapa]	gi|685262338|ref|XM_009151968.1|	225	1e-113	PREDICTED: Brassica rapa uncharacterized LOC103873559 (LOC103873559), mRNA	.	.
BraA01g025500.3C	12.0571	6.79824	9.38676	6.41166	5.11159	6.05084	4.67708	5.97902	6.00223	37.6072	35.2663	36.5192	11.1103	12.6049	11.2611	16.8177	20.7373	13.2124	25.5966	13.4607	15.3682	7.08334	5.02535	6.51808	16.5442	9.25094	8.45399	25.0699	28.6051	27.9511	15.0388	15.3427	16.9176	3.5927	6.31577	8.0583	BraA01g025500.3C	protein_coding	chrA01:15193778-15195845:+	gi|685262333|ref|XP_009150196.1|	1258	2e-172	PREDICTED: tetraspanin-3 [Brassica rapa]	gi|685262332|ref|XM_009151948.1|	858	0	PREDICTED: Brassica rapa tetraspanin-3 (LOC103873534), mRNA	Q9M1E7	446
BraA01g025630.3C	5.06195	5.03596	4.34193	5.41689	5.31992	5.39782	8.86543	5.88328	6.87155	5.1748	5.59731	4.70776	3.68223	4.24359	3.05558	6.88157	5.85189	6.00038	3.06304	3.06051	2.81862	4.53664	5.71832	5.5239	3.01039	2.93424	3.0355	5.02971	3.98261	3.80895	1.54249	2.20403	1.87531	6.26557	4.56663	4.69657	BraA01g025630.3C	protein_coding	chrA01:15368536-15374852:+	gi|674884350|emb|CDY48149.1|	2593	0	BnaCnng15910D [Brassica napus]	gi|567159620|ref|XM_006418999.1|	580	0	Eutrema salsugineum hypothetical protein (EUTSA_v10002405mg) mRNA, complete cds	.	.
BraA01g025640.3C	2.95515	3.53392	1.34063	6.96892	5.59977	2.16048	1.91869	1.74668	1.85462	71.7653	63.0385	62.0108	7.62582	10.9189	4.84651	6.00482	2.68344	4.28866	3.99615	3.32738	2.41747	7.35394	6.10069	7.85466	11.2667	4.24682	2.71668	30.0893	35.0034	47.495	7.00389	10.4162	9.00711	10.609	14.9547	33.1459	BraA01g025640.3C	protein_coding	chrA01:15389341-15389607:+	gi|923842365|ref|XP_013701250.1|	292	2e-32	PREDICTED: uncharacterized protein LOC106405217 [Brassica napus]	gi|685262299|ref|XM_009151689.1|	267	8e-137	PREDICTED: Brassica rapa uncharacterized LOC103873266 (LOC103873266), mRNA	.	.
BraA01g025690.3C	0.485256	0.105508	0.165105	0.298524	0.490411	0.304084	0.367571	0.286816	0.121817	0.889384	0.755997	1.14965	0.170756	0.115675	0.106111	0.53094	1.02816	0.422536	52.8783	80.8092	83.9296	35.4219	38.3031	41.2732	39.3717	60.8443	63.8475	20.4541	20.892	20.8504	31.9724	30.3883	30.9539	1.58836	0.993956	1.64417	BraA01g025690.3C	protein_coding	chrA01:15497836-15499559:+	gi|685262290|ref|XP_009149884.1|	2761	0	PREDICTED: high affinity nitrate transporter 2.6 [Brassica rapa]	gi|685262289|ref|XM_009151636.1|	1626	0	PREDICTED: Brassica rapa high affinity nitrate transporter 2.6 (LOC103873213), mRNA	Q9LXH0	1032
BraA01g025720.3C	42.6591	86.7637	37.372	47.1142	52.7022	45.7815	100.43	122.934	107.005	30.1279	38.7651	35.4698	42.5516	41.0765	40.3245	115.769	127.191	100.907	49.7375	53.7811	43.4549	87.0518	121.148	129.329	51.8656	35.8417	38.9078	42.0342	37.0536	36.3575	44.4224	36.9397	50.3489	73.0974	75.7637	94.3062	BraA01g025720.3C	protein_coding	chrA01:15511555-15512123:-	gi|685262279|ref|XP_009149840.1|	434	4e-53	PREDICTED: uncharacterized protein LOC103873167 [Brassica rapa]	gi|685262280|ref|XM_009151600.1|	244	5e-124	PREDICTED: Brassica rapa uncharacterized LOC103873167 (LOC103873167), transcript variant X2, mRNA	Q8RXD4	119
BraA01g025860.3C	0	0	0.0364658	0	0.0406178	0	0.0695856	0	0.0403573	0	0	0	0	0	0	0.0502566	0.0486606	0.139985	0.0362324	0.0362025	0.0751501	0.0762022	0.0390451	0.162781	0.0383074	0.0385052	0.0738949	0.211211	0.331169	0.351534	0.0381018	0.0377768	0	0.0678988	0.154962	0.075132	BraA01g025860.3C	protein_coding	chrA01:15692886-15695561:-	gi|685262263|ref|XP_009149771.1|	4125	0	PREDICTED: cation/H(+) antiporter 4 [Brassica rapa]	gi|685262262|ref|XM_009151523.1|	2454	0	PREDICTED: Brassica rapa cation/H(+) antiporter 4 (LOC103873090), mRNA	Q9FYC1	1419
BraA01g026090.3C	5.15305	5.50623	6.29801	4.75515	3.70027	3.69651	8.78247	6.20375	5.97438	9.78632	7.6787	6.67789	4.07992	4.29124	3.73628	5.91372	6.3724	8.14747	10.0398	8.03897	6.98878	7.30356	7.78094	8.34151	5.3074	4.09245	4.34763	10.2219	10.0565	9.40725	5.85743	6.59613	6.50978	16.1727	14.4111	14.6159	BraA01g026090.3C	protein_coding	chrA01:16194076-16198572:-	gi|685380598|ref|XP_009122974.1|	1854	0	PREDICTED: uncharacterized protein LOC103847639 [Brassica rapa]	gi|685380597|ref|XM_009124726.1|	1293	0	PREDICTED: Brassica rapa uncharacterized LOC103847639 (LOC103847639), mRNA	.	.
BraA01g026140.3C	0.270585	0.0882487	0	2.58015	1.64076	1.61083	0.263523	0.671717	0.611339	9.4847	7.3934	9.5243	5.52252	5.12789	5.68019	1.77635	0.737119	1.64928	0.64033	0	0	1.92387	1.97154	1.64389	1.64414	0.194427	0.279843	3.19946	4.68216	3.72756	4.1364	3.62424	3.09272	0.771406	0.684653	1.04327	BraA01g026140.3C	protein_coding	chrA01:16226013-16226984:-	gi|685380610|ref|XP_009122978.1|	1711	0	PREDICTED: probable nicotianamine synthase 4 [Brassica rapa]	gi|685380609|ref|XM_009124730.1|	972	0	PREDICTED: Brassica rapa probable nicotianamine synthase 4 (LOC103847645), mRNA	Q9C7X5	587
BraA01g026270.3C	57.4723	92.8306	50.5105	8.09001	8.86009	11.1707	40.4139	31.92	35.4332	43.585	50.4308	51.2334	11.106	12.3302	12.4609	65.7759	61.0334	50.1288	30.8236	22.7038	17.4173	7.27223	5.749	5.32621	18.3835	15.7486	13.7011	50.6794	56.527	55.7857	4.36342	4.94423	7.06201	43.8776	31.2671	30.1144	BraA01g026270.3C	protein_coding	chrA01:16309700-16310844:+	gi|685380627|ref|XP_009122986.1|	626	8e-81	PREDICTED: chaperone protein dnaJ 6 isoform X1 [Brassica rapa]	gi|685380626|ref|XM_009124738.1|	198	3e-98	PREDICTED: Brassica rapa dnaJ homolog subfamily B member 8 (LOC103847652), transcript variant X1, mRNA	Q6P642	70.1
BraA01g026830.3C	4.37473	18.3198	3.92957	14.0485	9.15189	10.856	20.4507	24.3887	19.3725	11.9068	10.7581	10.4829	16.441	15.2046	10.1593	1.72317	3.3369	3.88548	16.6825	13.6542	16.9326	23.8882	16.0651	12.1594	6.56731	7.35565	7.601	19.3117	20.6011	17.0467	17.9165	14.9881	13.2005	9.3123	9.1084	8.09626	BraA01g026830.3C	protein_coding	chrA01:17161338-17161838:-	gi|674884073|emb|CDY48399.1|	851	2e-114	BnaAnng09680D [Brassica napus]	gi|923529572|ref|XM_013837390.1|	498	0	PREDICTED: Brassica napus uncharacterized LOC106396884 (LOC106396884), mRNA	.	.
BraA01g027200.3C	84.4975	66.562	85.2848	81.6474	86.171	77.0144	85.3815	84.0818	91.1078	85.9306	85.0219	86.7542	54.9314	58.1347	54.9883	16.9946	19.6724	18.159	188.096	159.968	163.833	143.165	133.214	124.083	169.269	148.903	143.786	100.085	102.79	98.5523	117.183	110.76	113.13	46.883	46.9856	52.9418	BraA01g027200.3C	protein_coding	chrA01:17496508-17499031:-	gi|674909291|emb|CDY23805.1|	1919	0	BnaA01g21560D [Brassica napus]	gi|685263018|ref|XM_009104351.1|	814	0	PREDICTED: Brassica rapa ATP phosphoribosyltransferase 1, chloroplastic (LOC103828719), mRNA	Q9S762	660
BraA01g027600.3C	0	0.0373271	0	0.0704091	0.0433751	0	0.0371547	0.0811773	0.043097	0.157326	0.123444	0	0.0402741	0.0409241	0	0.107337	0.155892	0	1.54768	2.43559	1.96617	1.34269	1.04239	1.21682	1.26814	1.76812	1.73605	0.789422	0.495111	0.638177	1.0579	0.806826	0.971767	1.3414	1.24111	0.762207	BraA01g027600.3C	protein_coding	chrA01:17791855-17795607:+	gi|685263083|ref|XP_009102869.1|	3734	0	PREDICTED: CSC1-like protein RXW8 [Brassica rapa]	gi|685263084|ref|XM_009104627.1|	2298	0	PREDICTED: Brassica rapa CSC1-like protein RXW8 (LOC103828970), transcript variant X2, mRNA	F4IBD7	1274
BraA01g027650.3C	0	0	0	0	0	0	0	0	0	0	0	0	0	0	0	0	0	0	8.99134	17.3024	7.59776	9.45506	13.9957	11.969	7.04167	3.89292	7.81044	6.47081	7.30507	3.55405	3.15175	5.90252	5.4686	5.61653	10.3258	17.954	BraA01g027650.3C	protein_coding	chrA01:17842647-17842998:-	gi|685263112|ref|XP_009102990.1|	396	2e-47	PREDICTED: uncharacterized protein LOC103829035 isoform X3 [Brassica rapa]	gi|685263115|ref|XR_625445.1|	264	4e-135	PREDICTED: Brassica rapa uncharacterized LOC103829035 (LOC103829035), transcript variant X10, misc_RNA	F4IV45	63.9
BraA01g027660.3C	0.823189	0.671188	1.96059	1.77246	0.467962	0.902734	0.935322	0.583867	0.774936	1.27301	0.443933	1.39304	1.59319	1.17738	1.89006	0.193004	0	1.25438	33.2559	32.1162	31.1693	19.1682	13.0455	12.5028	37.8085	35.4899	35.7568	44.6121	42.8601	48.1958	41.9954	33.3678	36.6945	20.5998	20.2338	21.9287	BraA01g027660.3C	protein_coding	chrA01:17855590-17856228:+	gi|685263121|ref|XP_009103021.1|	796	9e-105	PREDICTED: uncharacterized protein LOC103829100 [Brassica rapa]	gi|685263120|ref|XM_009104773.1|	639	0	PREDICTED: Brassica rapa uncharacterized LOC103829100 (LOC103829100), mRNA	.	.
BraA01g027800.3C	31.0977	17.4706	29.3384	15.3462	15.2465	16.1064	16.3367	18.7159	18.5423	51.3859	52.6185	48.0215	26.4355	25.4186	24.7831	16.7009	18.3637	18.0173	37.9251	28.469	28.7143	18.5565	17.4141	19.6831	25.125	31.2382	32.5842	60.7397	62.8453	58.4805	20.9662	20.6094	22.1551	61.1136	69.3472	49.0249	BraA01g027800.3C	protein_coding	chrA01:17996521-18004822:+	gi|923511704|ref|XP_013747359.1|	6360	0	PREDICTED: phospholipid-transporting ATPase 3 [Brassica napus]	gi|923511703|ref|XM_013891905.1|	3588	0	PREDICTED: Brassica napus phospholipid-transporting ATPase 3 (LOC106450257), mRNA	Q9XIE6	2358
BraA01g027860.3C	61.7952	107.921	65.8829	27.4221	27.9349	26.8725	66.98	69.7201	69.6484	77.7728	75.0151	79.2442	45.5864	45.8306	46.7935	29.5555	26.6963	24.6787	39.0766	34.4004	36.5203	22.0686	21.7292	21.6036	29.4077	37.0824	39.7019	94.027	93.5556	90.8105	19.926	21.4335	21.6191	54.0338	50.2294	44.1104	BraA01g027860.3C	protein_coding	chrA01:18049534-18052102:-	gi|685263178|ref|XP_009103244.1|	2298	0	PREDICTED: formin-like protein 7 [Brassica rapa]	gi|685263177|ref|XM_009104996.1|	2487	0	PREDICTED: Brassica rapa formin-like protein 7 (LOC103829333), mRNA	Q9XIE0	747
BraA01g028090.3C	1.92389	1.16837	2.03149	1.28559	0.94283	1.40307	0.936838	0.882261	1.01173	5.40318	4.54364	4.4794	4.30708	5.15941	4.11266	7.04608	6.18979	5.58889	2.48947	2.85716	3.07015	2.58248	2.03017	2.5694	3.20112	2.68138	2.74443	3.33383	3.01337	3.39452	3.92687	4.4195	4.80954	2.14348	1.40283	2.37182	BraA01g028090.3C	protein_coding	chrA01:18329482-18333887:-	gi|674877144|emb|CDY54954.1|	3772	0	BnaC01g43090D [Brassica napus]	gi|685263240|ref|XM_009105410.1|	1030	0	PREDICTED: Brassica rapa putative potassium transporter 12 (LOC103829716), mRNA	O80739	1330
BraA01g028200.3C	26.3968	16.0988	27.0986	28.9228	28.8641	29.8884	22.5128	24.1102	20.2407	37.0484	37.5618	38.7938	34.6862	34.1632	31.5869	28.1876	26.2613	30.7858	33.6308	37.5413	37.956	40.7482	36.6828	33.5188	79.1233	81.1639	80.9079	34.6635	36.7277	33.8709	88.1189	82.6173	86.2848	81.825	88.5559	80.7764	BraA01g028200.3C	protein_coding	chrA01:18418151-18420187:+	gi|685263257|ref|XP_009103743.1|	2807	0	PREDICTED: probable nucleoredoxin 1 [Brassica rapa]	gi|685263256|ref|XM_009105495.1|	1737	0	PREDICTED: Brassica rapa probable nucleoredoxin 1 (LOC103829793), mRNA	O80763	965
BraA01g028390.3C	0.648204	0.79277	0.937326	3.38953	4.1762	4.16349	1.36779	1.60914	1.95267	2.61739	2.62175	1.70023	3.76358	4.0561	3.61443	1.3678	2.428	2.61046	0.383488	0.492648	0.56814	1.8435	1.29881	1.16911	0.752977	0.523984	0.837976	0.904837	0.951392	0.903592	1.49787	0.971025	1.323	0.25666	0.29288	0.624804	BraA01g028390.3C	protein_coding	chrA01:18623703-18625704:-	gi|685263295|ref|XP_009103874.1|	1465	0	PREDICTED: inactive leucine-rich repeat receptor-like serine/threonine-protein kinase At1g60630 [Brassica rapa]	gi|685263294|ref|XM_009105626.1|	992	0	PREDICTED: Brassica rapa inactive leucine-rich repeat receptor-like serine/threonine-protein kinase At1g60630 (LOC103829940), mRNA	Q84MA9	390
BraA01g028460.3C	24.2043	13.1478	21.153	43.1766	40.9564	36.2194	30.4314	35.3971	36.1215	109.245	113.242	106.112	55.0342	53.8384	55.9985	12.8682	8.71066	57.9409	46.1402	68.0868	61.4728	73.6432	52.8186	58.094	95.6556	109.237	114.697	142.061	141.226	135.334	109.56	107.342	110.871	77.1577	79.9703	79.0782	BraA01g028460.3C	protein_coding	chrA01:18642149-18643599:-	gi|685263312|ref|XP_009103955.1|	1821	0	PREDICTED: probable aldo-keto reductase 6 [Brassica rapa]	gi|685263311|ref|XM_009105707.1|	703	0	PREDICTED: Brassica rapa probable aldo-keto reductase 6 (LOC103830009), mRNA	F4HPY8	615
BraA01g028600.3C	13.1649	26.7525	13.5855	23.6292	22.6985	28.1488	26.0653	27.8587	26.3118	24.6094	24.9657	22.9149	17.4104	16.2947	20.357	86.9007	76.456	58.7653	20.8347	12.901	13.8466	23.4522	28.3023	33.6184	13.8062	8.88784	7.03209	17.9613	15.9587	19.7872	16.2008	18.0513	20.4093	22.9589	19.453	24.1877	BraA01g028600.3C	protein_coding	chrA01:18791600-18793009:+	gi|674901338|emb|CDY31709.1|	450	9e-48	BnaA05g08380D [Brassica napus]	gi|685263363|ref|XR_625697.1|	208	1e-103	PREDICTED: Brassica rapa uncharacterized LOC103830185 (LOC103830185), transcript variant X2, ncRNA	Q94FN2	164
BraA01g028620.3C	0.980644	0.959483	0.600584	7.60135	4.68276	5.71501	1.14606	0.625991	0.221559	1.4154	0.634616	0.39828	1.24228	2.31427	1.54395	2.20724	3.20572	1.79318	3.38153	4.37248	5.56968	4.39262	5.57323	5.80878	1.47213	1.69113	0.811356	0.966279	1.09086	0.57897	4.18353	3.94045	4.80365	0.74552	1.27609	1.03117	BraA01g028620.3C	protein_coding	chrA01:18802673-18803119:+	gi|685263367|ref|XP_009104198.1|	618	9e-80	PREDICTED: ferredoxin, leaf L-A [Brassica rapa]	gi|923512342|ref|XM_013894075.1|	447	0	PREDICTED: Brassica napus ferredoxin, leaf L-A-like (LOC106452060), mRNA	P16972	221
BraA01g028800.3C	0	0	0	0	0	0	0	0	0	0.0656381	0	0	0	0	0	0	0	0.166314	0.645711	1.16132	1.20535	4.00618	3.61835	2.46584	2.52595	4.32315	4.01657	2.13297	1.53449	2.38063	1.49386	2.289	2.1831	5.0217	5.86845	6.15919	BraA01g028800.3C	protein_coding	chrA01:18958168-18961742:-	gi|685263404|ref|XP_009104389.1|	2446	0	PREDICTED: serine carboxypeptidase-like 32 [Brassica rapa]	gi|685263403|ref|XM_009106141.1|	953	0	PREDICTED: Brassica rapa serine carboxypeptidase-like 32 (LOC103830359), mRNA	Q4PSY2	728
BraA01g028870.3C	0.749313	2.19943	1.91212	2.42009	5.96352	3.16949	5.10829	8.37063	10.5809	27.0378	31.1152	41.8449	16.6115	32.9554	12.9033	0	1.02063	0	3.41978	1.13899	3.15245	15.9829	13.9221	11.9498	7.63299	8.07622	8.52444	23.2576	17.3651	18.433	11.9874	11.489	14.6819	0	0	0	BraA01g028870.3C	protein_coding	chrA01:19001368-19001683:+	gi|685381067|ref|XP_009123156.1|	315	4e-36	PREDICTED: defensin-like protein 206 [Brassica rapa]	gi|685383619|ref|XM_009125848.1|	234	2e-118	PREDICTED: Brassica rapa defensin-like protein 206 (LOC103849027), mRNA	Q2V2Q8	76.3
BraA01g028880.3C	22.854	13.1966	19.5036	35.6099	31.9474	30.6384	49.6234	57.3986	69.8337	298.961	359.239	327.912	235.33	329.554	274.656	0.52705	0	0	48.6369	42.5221	55.1679	179.408	111.377	112.243	125.744	142.949	126.317	225.193	204.909	226.726	251.736	262.662	221.33	0.712067	0.406278	0	BraA01g028880.3C	protein_coding	chrA01:19012053-19012367:+	gi|685381067|ref|XP_009123156.1|	264	2e-28	PREDICTED: defensin-like protein 206 [Brassica rapa]	gi|685383619|ref|XM_009125848.1|	225	2e-113	PREDICTED: Brassica rapa defensin-like protein 206 (LOC103849027), mRNA	Q94JR6	68.2
BraA01g028890.3C	1.49863	5.49857	0	15.5577	6.81545	11.6215	24.082	22.7203	20.3153	83.8173	61.4221	77.9837	43.5063	79.1734	62.3046	0	0.510313	0	8.35947	6.83392	5.51679	73.921	44.6326	64.4437	21.6938	20.5944	22.861	65.7119	71.1971	74.1007	26.3723	44.7675	32.3002	0	0	0	BraA01g028890.3C	protein_coding	chrA01:19015941-19016256:+	gi|685381067|ref|XP_009123156.1|	309	4e-35	PREDICTED: defensin-like protein 206 [Brassica rapa]	gi|923896025|ref|XM_013863266.1|	228	3e-115	PREDICTED: Brassica napus defensin-like protein 206 (LOC106422484), mRNA	Q2V2Q8	74.7
BraA01g028900.3C	3.74656	2.93257	3.44181	12.4462	8.51931	9.50847	16.0546	20.3287	18.1991	51.3719	66.6753	66.5714	22.1487	44.2085	36.498	0	0	0	6.45959	6.07459	7.09301	36.7607	20.8831	26.0335	11.6504	12.922	15.499	28.7951	37.856	37.972	17.5816	14.6584	13.2137	0	0.406278	0	BraA01g028900.3C	protein_coding	chrA01:19018857-19019173:+	gi|685381067|ref|XP_009123156.1|	315	4e-36	PREDICTED: defensin-like protein 206 [Brassica rapa]	gi|923896021|ref|XM_013863264.1|	228	3e-115	PREDICTED: Brassica napus defensin-like protein 206 (LOC106422482), mRNA	Q2V2Q8	76.3
BraA01g028910.3C	4.68674	6.74353	4.50249	24.6771	22.8816	26.1732	33.8304	48.6895	42.9783	157.745	160.272	143.88	98.3705	156.148	116.38	0	0.375513	0	38.3059	19.8356	20.8775	117.022	103.651	119.337	43.4558	50.2173	40.4874	117.897	105.292	109.596	95.8541	108.155	106.956	0.785961	1.19584	0	BraA01g028910.3C	protein_coding	chrA01:19021609-19022008:+	gi|674929542|emb|CDY03798.1|	354	5e-40	BnaC01g29150D [Brassica napus]	gi|923896025|ref|XM_013863266.1|	281	2e-144	PREDICTED: Brassica napus defensin-like protein 206 (LOC106422484), mRNA	Q2V2Q8	76.6
BraA01g028920.3C	0.374656	0.366572	0	0	1.2779	0.704331	3.64878	3.98601	4.23234	3.09004	3.23274	6.46694	2.37307	3.21516	3.318	0	0	0	3.41978	1.13899	3.54651	16.7821	16.7884	15.7908	1.20521	1.61524	1.5499	5.16835	3.82033	5.5299	3.19665	3.56555	3.67048	0	0	0	BraA01g028920.3C	protein_coding	chrA01:19024611-19024926:+	gi|685381067|ref|XP_009123156.1|	315	4e-36	PREDICTED: defensin-like protein 206 [Brassica rapa]	gi|923896021|ref|XM_013863264.1|	231	7e-117	PREDICTED: Brassica napus defensin-like protein 206 (LOC106422482), mRNA	Q2V2Q8	76.3
BraA01g028930.3C	2.24794	1.83286	1.52969	6.22308	4.68562	2.46516	4.01366	6.37762	5.92528	34.3767	26.6701	40.7037	17.798	22.908	27.65	0	0	0	5.69964	1.89831	2.75839	20.3782	14.741	13.6569	9.23994	10.0953	9.29939	22.1501	21.1855	27.6495	20.3786	18.2239	20.1876	0	0	0	BraA01g028930.3C	protein_coding	chrA01:19027223-19027538:+	gi|685381067|ref|XP_009123156.1|	310	2e-35	PREDICTED: defensin-like protein 206 [Brassica rapa]	gi|923782303|ref|XM_013826792.1|	225	2e-113	PREDICTED: Brassica napus defensin-like protein 206 (LOC106386965), mRNA	Q2V2Q8	73.9
BraA01g028940.3C	1.49863	1.83286	0	5.53163	3.40773	8.80413	14.2303	9.56643	13.1203	39.0117	47.2789	42.6057	33.223	44.6104	32.074	0	0	0	4.93969	3.41696	2.36434	26.3718	19.2452	23.0461	12.4538	9.69146	8.13697	18.4584	18.4071	25.4375	17.182	17.8278	19.0865	0	0	0	BraA01g028940.3C	protein_coding	chrA01:19031227-19031542:+	gi|685381067|ref|XP_009123156.1|	311	2e-35	PREDICTED: defensin-like protein 206 [Brassica rapa]	gi|923896025|ref|XM_013863266.1|	231	7e-117	PREDICTED: Brassica napus defensin-like protein 206 (LOC106422484), mRNA	Q2V2Q8	74.7
BraA01g029060.3C	41.3323	79.9329	43.0131	55.2743	49.7462	49.3226	42.7694	40.7102	49.6096	110.691	120.853	109.671	13.9762	14.5482	12.7098	80.1757	73.4512	27.4143	102.014	73.9523	70.8125	43.7367	57.5253	53.5195	21.9867	18.7939	18.5346	98.6352	100.875	92.6213	44.4263	49.8521	58.6831	86.5338	89.9916	106.278	BraA01g029060.3C	protein_coding	chrA01:19178369-19179642:+	gi|685263452|ref|XP_009104615.1|	854	1e-114	PREDICTED: F-box protein At1g61340 [Brassica rapa]	gi|685263451|ref|XM_009106367.1|	543	0	PREDICTED: Brassica rapa F-box protein At1g61340 (LOC103830560), mRNA	Q8GX77	236
BraA01g029070.3C	0.173174	0.0423594	0.220956	0.639211	0.443004	0.447641	0.295146	0.322424	0.489071	0.446339	0.373562	0.439583	1.50822	1.81121	1.06504	3.65421	4.71756	4.35411	3.29312	2.58845	3.00534	5.35605	6.4351	6.11527	8.82035	7.9793	9.40272	5.46041	5.17713	5.41029	5.21764	6.04295	6.7439	13.1242	15.5866	13.8849	BraA01g029070.3C	protein_coding	chrA01:19198838-19201775:-	gi|685263454|ref|XP_009104626.1|	2905	0	PREDICTED: G-type lectin S-receptor-like serine/threonine-protein kinase SD1-29 [Brassica rapa]	gi|685263453|ref|XM_009106378.1|	1375	0	PREDICTED: Brassica rapa G-type lectin S-receptor-like serine/threonine-protein kinase SD1-29 (LOC103830568), mRNA	O64782	907
BraA01g029080.3C	0.0759044	2.26513	0.077478	0.105065	0.215749	0.178369	0.110885	0.121133	0.385858	0.0391271	0.245605	0.115605	0.160259	0.162846	0.149382	0.106779	0.25847	0.446132	0.307928	0.346133	0.239504	0.202381	0.663665	0.129697	0.284868	0.736299	0.235504	0	0.0703627	0.112034	0.202385	0.200659	0.371815	1.00984	1.39928	0.518801	BraA01g029080.3C	protein_coding	chrA01:19205390-19208722:-	gi|685263458|ref|XP_009104645.1|	2915	0	PREDICTED: G-type lectin S-receptor-like serine/threonine-protein kinase At1g61490 isoform X2 [Brassica rapa]	gi|923512756|ref|XM_013895425.1|	1474	0	PREDICTED: Brassica napus G-type lectin S-receptor-like serine/threonine-protein kinase At1g61490 (LOC106453152), transcript variant X3, mRNA	O64770	848
BraA01g029090.3C	2.27292	5.40082	2.65147	0.89889	1.47668	1.52605	0.948683	3.10909	0.366803	0.669508	0.350214	0.329687	1.71388	2.78648	1.59755	10.9626	7.96088	12.723	2.96381	4.27753	7.17182	3.80926	3.90364	5.91801	2.4372	5.94948	6.38042	2.23962	2.10697	3.19505	3.80934	5.15024	3.49919	40.1131	40.1402	26.2904	BraA01g029090.3C	protein_coding	chrA01:19211996-19212265:+	gi|685263460|ref|XP_009104655.1|	354	1e-41	PREDICTED: uncharacterized protein LOC103830591 [Brassica rapa]	gi|923512759|ref|XM_013895455.1|	270	2e-138	PREDICTED: Brassica napus uncharacterized LOC106453194 (LOC106453194), mRNA	.	.
BraA01g029140.3C	8.03638	14.0104	7.6064	17.2587	15.6159	17.7174	10.6727	10.4154	15.0206	9.9422	11.1893	12.0171	11.723	10.5015	10.9273	20.9661	21.0963	28.2451	24.3033	15.103	16.5976	27.5825	46.6308	46.7707	11.9075	9.60666	9.67137	13.9656	13.9512	11.2146	20.7263	19.9314	21.6155	19.3006	23.6088	23.0467	BraA01g029140.3C	protein_coding	chrA01:19236618-19237795:-	gi|685267698|ref|XP_009124952.1|	600	4e-88	PREDICTED: germin-like protein subfamily 2 member 3 [Brassica rapa]	gi|923519922|ref|XM_013809470.1|	483	0	PREDICTED: Brassica napus germin-like protein subfamily 2 member 3 (LOC106369325), mRNA	P93000	209
BraA01g029150.3C	0.829373	0.334137	1.19515	1.71074	1.2203	2.24704	0.99778	1.60904	1.15736	2.16277	3.15719	2.97214	4.58371	3.19235	4.12857	1.50988	1.46193	5.09771	0.0494793	0.0494385	0.102626	0.156094	0	0.0555739	0.156939	0.420664	0.706381	0.817224	0.904495	0.384047	0.520322	1.44447	0.573551	0.741786	1.53422	0.820808	BraA01g029150.3C	protein_coding	chrA01:19252421-19255382:-	gi|685263466|ref|XP_009104693.1|	2248	0	PREDICTED: G-type lectin S-receptor-like serine/threonine-protein kinase At1g61500 [Brassica rapa]	gi|685263465|ref|XM_009106445.1|	1249	0	PREDICTED: Brassica rapa G-type lectin S-receptor-like serine/threonine-protein kinase At1g61500 (LOC103830629), mRNA	O64776	671
BraA01g029170.3C	0	0.104353	0	0.0984186	0	0	0.10387	0	0	2.41903	1.84054	2.38241	0	0.228816	0.104949	0.450109	0.145272	0.278607	1.08168	0.648474	0.112177	0.909976	0.699392	0.485968	0.343089	0.919628	0.330909	1.05092	0.988672	1.25936	0.568746	0.451116	0.522441	2.63517	2.19746	2.57944	BraA01g029170.3C	protein_coding	chrA01:19265135-19266132:+	gi|685263471|ref|XP_009104717.1|	1340	0	PREDICTED: chlorophyll a-b binding protein 8, chloroplastic [Brassica rapa]	gi|685263470|ref|XM_009106469.1|	822	0	PREDICTED: Brassica rapa chlorophyll a-b binding protein 8, chloroplastic (LOC103830657), mRNA	Q9SY97	465
BraA01g029180.3C	4.21677	9.01914	4.0039	7.46561	7.41438	6.68287	3.34268	2.81696	3.48955	2.47696	1.69231	2.29011	7.816	8.9415	9.84265	7.03559	9.75074	10.4389	3.18262	6.01216	6.65267	5.96141	4.39428	5.13854	6.94006	10.1996	10.4462	6.08756	6.31788	6.46516	7.112	7.25873	7.01333	11.043	11.9102	11.7554	BraA01g029180.3C	protein_coding	chrA01:19266718-19269981:-	gi|685263473|ref|XP_009104728.1|	3127	0	PREDICTED: MLO-like protein 6 [Brassica rapa]	gi|685263472|ref|XM_009106480.1|	1788	0	PREDICTED: Brassica rapa MLO-like protein 6 (LOC103830668), mRNA	Q94KB7	995
BraA01g029260.3C	5.76971	6.1584	6.57768	20.8128	23.6837	23.0316	11.7491	14.7482	9.98833	5.17581	5.17239	7.456	12.4191	12.3784	10.0277	38.053	31.5373	31.1225	2.43185	2.42984	2.04909	6.39317	7.45241	8.96237	3.69598	3.31125	2.47984	0.664503	1.31975	0.811052	1.75816	0.71311	1.90865	4.77085	6.09416	5.20029	BraA01g029260.3C	protein_coding	chrA01:19301534-19303072:-	gi|685263490|ref|XP_009104801.1|	1900	0	PREDICTED: 60S ribosomal protein L3-2 [Brassica rapa]	gi|685263489|ref|XM_009106553.1|	1170	0	PREDICTED: Brassica rapa 60S ribosomal protein L3-2 (LOC103830735), mRNA	P22738	692
BraA01g029280.3C	34.5576	35.1734	33.8536	34.6001	36.3017	33.8638	24.9971	25.8268	26.4622	6.93419	7.00428	7.22172	13.7927	11.4445	12.7804	0.870051	1.15833	3.83711	39.047	59.7757	59.3586	89.5424	85.5929	90.003	49.9046	35.3303	37.8987	20.6441	20.353	20.0832	70.4975	70.1414	63.7732	15.2077	16.5993	22.5183	BraA01g029280.3C	protein_coding	chrA01:19315840-19318066:-	gi|923523019|ref|XP_013674095.1|	1874	0	PREDICTED: serine/threonine-protein kinase At5g01020-like [Brassica napus]	gi|923523018|ref|XM_013818641.1|	674	0	PREDICTED: Brassica napus serine/threonine-protein kinase At5g01020-like (LOC106378522), mRNA	Q9SY91	662
BraA01g029440.3C	0	0	0	0	0	0.196206	0.609868	0	0	0.1076	0	0.105971	0	0.111957	0	0	0.142159	0	4.86912	5.81696	3.95182	3.78453	3.42202	4.27999	2.35016	1.23739	1.83497	5.9647	6.77241	5.03221	1.33574	3.09014	3.78322	3.86805	6.22475	3.62163	BraA01g029440.3C	protein_coding	chrA01:19467061-19469371:-	gi|674883417|emb|CDY49040.1|	832	2e-109	BnaA01g22860D [Brassica napus]	gi|685263533|ref|XR_625825.1|	202	4e-100	PREDICTED: Brassica rapa uncharacterized LOC103830912 (LOC103830912), transcript variant X2, ncRNA	.	.
BraA01g029490.3C	0	0	0	0	0	0	0.790569	0	0	0	0	0	0	0	0	0	1.10568	0.530127	5.35133	1.2339	3.41515	5.19445	6.21034	12.021	10.4451	7.43685	6.71623	3.99932	8.27738	5.19196	13.4193	16.3091	14.7125	16.9709	15.4047	24.3271	BraA01g029490.3C	protein_coding	chrA01:19525978-19526728:+	gi|685263564|ref|XP_009105127.1|	373	5e-45	PREDICTED: DNA-directed RNA polymerase subunit 10-like protein [Brassica rapa]	gi|685263563|ref|XM_009106879.1|	216	1e-108	PREDICTED: Brassica rapa DNA-directed RNA polymerase subunit 10-like protein (LOC103831031), mRNA	Q9SYA6	141
BraA01g029590.3C	2.75129	7.78475	3.03603	0.686176	1.01451	0.838745	0.362093	1.02845	0.504004	62.8622	60.4721	61.4577	0.313994	0.478593	0.146341	57.2191	57.0226	11.1691	13.9518	17.0297	18.9267	7.21671	5.11998	5.50578	4.38537	6.01093	4.76801	6.74084	7.99592	8.12178	6.89963	7.23393	8.01342	7.63162	8.30543	13.6834	BraA01g029590.3C	protein_coding	chrA01:19660076-19661535:+	gi|685263589|ref|XP_009105258.1|	1951	0	PREDICTED: glucose-6-phosphate/phosphate translocator 2, chloroplastic [Brassica rapa]	gi|685263588|ref|XM_009107010.1|	1153	0	PREDICTED: Brassica rapa glucose-6-phosphate/phosphate translocator 2, chloroplastic (LOC103831151), mRNA	Q94B38	650
BraA01g029670.3C	30.2972	8.18511	27.9827	13.9789	10.4753	11.6889	10.074	10.4037	9.00335	14.6852	13.6563	14.8072	26.7326	26.1333	26.9761	1.98791	1.84779	3.54375	32.6765	52.2964	56.7167	40.2093	37.19	36.7658	38.3662	49.4696	47.7021	25.509	25.8321	22.5817	71.3773	70.888	69.9961	19.9819	20.8404	24.4286	BraA01g029670.3C	protein_coding	chrA01:19772218-19775132:+	gi|685263651|ref|XP_009105752.1|	2705	0	PREDICTED: beta-glucosidase 45-like [Brassica rapa]	gi|685263650|ref|XM_009107504.1|	1551	0	PREDICTED: Brassica rapa beta-glucosidase 45-like (LOC103831615), transcript variant X1, mRNA	O80689	857
BraA01g029840.3C	6.23666	2.3246	5.88093	1.42507	0.945436	1.6191	0.752005	1.13747	0.872276	1.10224	0.640635	0.663395	2.44542	1.78402	1.22739	0.417784	0.323613	1.39643	2.28912	3.97256	4.0607	2.91396	1.75274	1.55618	7.83386	5.88973	5.03717	4.03834	3.08337	3.27298	3.10406	3.45443	2.50219	2.48355	1.2882	1.56143	BraA01g029840.3C	protein_coding	chrA01:19966495-19967970:+	gi|685263706|ref|XP_009106012.1|	2217	0	PREDICTED: LOW QUALITY PROTEIN: ammonium transporter 1 member 3-like [Brassica rapa]	gi|685263705|ref|XM_009107764.1|	1470	0	PREDICTED: Brassica rapa ammonium transporter 1 member 3-like (LOC103831827), mRNA	Q9SQH9	779
BraA01g029860.3C	6.37161	7.87468	7.09051	13.3507	13.8893	13.9596	9.42462	11.5189	11.5272	16.6938	16.2763	14.7873	16.6387	14.492	15.5094	27.2269	24.2089	18.0208	5.39317	4.66051	5.79456	5.51804	10.8383	10.6961	5.08559	3.92425	4.60777	4.43728	3.59715	4.05405	2.96345	3.44475	3.28538	7.23857	6.02623	7.45556	BraA01g029860.3C	protein_coding	chrA01:19987303-19990145:+	gi|685263709|ref|XP_009106030.1|	3060	0	PREDICTED: putative dihydroxy-acid dehydratase, mitochondrial [Brassica rapa]	gi|685263708|ref|XM_009107782.1|	1830	0	PREDICTED: Brassica rapa putative dihydroxy-acid dehydratase, mitochondrial (LOC103831845), mRNA	Q9LIR4	1108
BraA01g029880.3C	54.7638	14.2963	50.0788	35.0786	37.9525	35.0619	9.13975	9.60532	9.52794	57.5614	42.4101	55.1221	14.6725	18.9871	15.0794	1.33691	1.29445	1.24127	30.12	20.8259	24.9889	11.9092	11.0358	11.9082	39.9973	32.6496	37.4716	27.3905	35.1284	32.6129	39.7826	33.1625	30.6082	6.54754	4.76633	5.37133	BraA01g029880.3C	protein_coding	chrA01:20014885-20015622:+	gi|685263716|ref|XP_009106061.1|	1259	7e-174	PREDICTED: dirigent protein 16 [Brassica rapa]	gi|923918764|ref|XM_013873296.1|	738	0	PREDICTED: Brassica napus dirigent protein 16 (LOC106432456), mRNA	Q7Y225	468
BraA01g029990.3C	0.480193	0.872544	0.420127	1.70916	1.32589	1.28962	1.60341	2.11652	2.01483	0.990118	1.47978	1.18409	1.52077	0.883038	1.01253	3.95659	2.99	2.68797	2.92207	4.72706	3.82401	3.36542	3.82367	3.36014	5.5168	6.43254	7.30744	10.0715	9.34783	10.2602	3.65813	4.20724	4.4356	7.43157	8.25716	7.64618	BraA01g029990.3C	protein_coding	chrA01:20067270-20069329:-	gi|674915057|emb|CDY18071.1|	1013	5e-134	BnaA01g23320D [Brassica napus]	gi|685263733|ref|XM_009107905.1|	687	0	PREDICTED: Brassica rapa probable calcium-binding protein CML22 (LOC103831952), mRNA	Q9LRN6	356
BraA01g030100.3C	1.47795	1.38033	1.16573	3.84353	4.35366	3.82039	1.07954	1.28652	1.44192	3.74001	4.05765	3.00129	2.30488	1.87366	1.85096	4.01649	2.83664	4.34338	1.19234	0.987121	0.918559	2.00613	1.72543	1.72183	0.720355	1.12232	1.00743	2.58163	2.491	2.2145	1.00309	0.781416	0.723971	2.5217	2.65902	1.90732	BraA01g030100.3C	protein_coding	chrA01:20149271-20155631:+	gi|674915067|emb|CDY18081.1|	3857	0	BnaA01g23420D [Brassica napus]	gi|685263750|ref|XM_009107985.1|	2088	0	PREDICTED: Brassica rapa uncharacterized aarF domain-containing protein kinase At1g71810, chloroplastic-like (LOC103832022), mRNA	Q55680	439
BraA01g030200.3C	39.2048	19.7677	38.0535	161.245	163.871	160.179	33.0868	34.6094	39.6691	85.6723	86.451	85.2913	112.989	115.007	117.272	281.933	265.608	351.69	17.3804	9.74935	12.0163	30.9743	47.3826	43.5631	61.9616	37.0708	34.0786	13.3311	12.653	13.5494	19.9445	22.3177	21.1483	32.5705	36.3192	48.2432	BraA01g030200.3C	protein_coding	chrA01:20253154-20254956:+	gi|922417893|ref|XP_013606699.1|	2524	0	PREDICTED: adenosylhomocysteinase 2 [Brassica oleracea var. oleracea]	gi|685263767|ref|XM_009108074.1|	1452	0	PREDICTED: Brassica rapa adenosylhomocysteinase 2 (LOC103832114), mRNA	Q9LK36	959
BraA01g030550.3C	1.19664	0.862707	1.54288	1.22048	1.43213	1.89441	0.613373	0.804075	0.782619	3.11668	2.85304	4.98794	2.59299	2.0268	1.61133	0.088599	0.257356	0.082261	3.57701	3.76553	3.24587	2.35094	1.10134	1.5066	3.71433	3.52986	4.95032	4.28203	4.26194	4.09022	4.23177	4.79505	4.25744	0.538654	0.546373	0.794715	BraA01g030550.3C	protein_coding	chrA01:20526381-20529691:-	gi|685264087|ref|XP_009107970.1|	2148	0	PREDICTED: uncharacterized protein LOC103833648 [Brassica rapa]	gi|685264086|ref|XM_009109722.1|	869	0	PREDICTED: Brassica rapa uncharacterized LOC103833648 (LOC103833648), mRNA	O53732	203
BraA01g030570.3C	0.340244	0.443869	0.347298	0.104657	0.343858	0.106606	0.994093	0.804422	1.23849	1.59799	1.42713	1.42026	2.75375	1.7438	2.86444	1.32956	1.39032	2.07387	0.153367	0	0.15905	0	0	0	0.0810749	0.203734	0	0.633269	0.420537	0.520798	0.403199	0.239856	0.25926	0	0	0	BraA01g030570.3C	protein_coding	chrA01:20543337-20547510:-	gi|923519951|ref|XP_013664988.1|	3938	0	PREDICTED: uncharacterized protein LOC106369370 [Brassica napus]	gi|923519950|ref|XM_013809534.1|	969	0	PREDICTED: Brassica napus uncharacterized LOC106369370 (LOC106369370), mRNA	O53732	223
BraA01g030660.3C	24.7454	29.0538	23.1536	22.3998	23.5123	24.4783	57.38	58.3581	55.0427	84.0058	79.4971	83.2128	61.9486	69.079	60.8746	16.4937	18.4577	31.1663	19.5994	16.4189	14.4387	10.3051	4.70068	6.17453	6.88622	10.3509	11.5774	26.4729	28.0727	29.6251	11.6877	11.7126	10.7362	8.56634	7.21962	7.24857	BraA01g030660.3C	protein_coding	chrA01:20648997-20650484:+	gi|685264093|ref|XP_009108016.1|	2489	0	PREDICTED: cytochrome P450 89A2-like [Brassica rapa]	gi|685264092|ref|XM_009109768.1|	1488	0	PREDICTED: Brassica rapa cytochrome P450 89A2-like (LOC103833694), mRNA	Q42602	714
BraA01g030750.3C	0.229652	2.13461	0.937651	1.32449	2.08882	1.88882	5.92694	6.96338	4.73457	2.24923	3.52966	2.15689	8.06098	9.60759	6.94889	7.02665	6.3343	3.74942	2.32912	1.80358	1.6908	1.10216	2.13344	2.48521	2.21626	4.64105	4.57205	3.56403	4.68347	2.8812	4.10257	3.33906	4.27478	47.4665	39.0362	26.4426	BraA01g030750.3C	protein_coding	chrA01:20721473-20724294:-	gi|685264107|ref|XP_009108082.1|	2199	0	PREDICTED: pre-mRNA-splicing factor SLU7-like [Brassica rapa]	gi|685264106|ref|XM_009109834.1|	939	0	PREDICTED: Brassica rapa pre-mRNA-splicing factor SLU7-like (LOC103833762), mRNA	Q6ZK48	654
BraA01g030980.3C	96.6498	86.4367	98.8063	183.242	187.355	185.987	162.71	176.076	178.038	41.4307	38.2993	37.7262	104.242	105.362	100.701	395.676	394.324	144.906	52.9767	62.9053	66.8251	100.763	122.726	123.224	60.6247	59.6068	53.403	16.3701	16.6492	16.9367	122.993	121.192	136.734	79.8272	83.4643	104.266	BraA01g030980.3C	protein_coding	chrA01:20906988-20909407:-	gi|685264128|ref|XP_009108178.1|	3696	0	PREDICTED: ethylene receptor 2 [Brassica rapa]	gi|685264127|ref|XM_009109930.1|	2343	0	PREDICTED: Brassica rapa ethylene receptor 2 (LOC103833878), mRNA	Q0WPQ2	1206
BraA01g031070.3C	11.6712	8.58663	10.2508	36.5678	40.4259	39.3749	11.9834	12.6096	14.8198	24.7179	27.3232	25.1705	21.8719	20.9633	24.7497	42.0008	49.4166	36.7511	9.90996	5.50099	6.75629	18.4298	23.3362	28.8572	19.1117	13.7496	14.9712	10.0738	9.22557	10.8612	24.0268	19.8994	21.007	12.0368	7.35828	7.23035	BraA01g031070.3C	protein_coding	chrA01:20982815-20984147:+	gi|685264147|ref|XP_009108247.1|	1540	0	PREDICTED: protein WVD2-like 1 isoform X2 [Brassica rapa]	gi|685264146|ref|XM_009109999.1|	518	0	PREDICTED: Brassica rapa protein WVD2-like 1 (LOC103833948), transcript variant X2, mRNA	Q84WL6	417
BraA01g031100.3C	117.638	133.189	124.338	174.32	167.822	175.745	204.015	220.016	220.475	134.961	144.249	141.395	77.7544	77.25	75.8512	226.944	223.798	129.502	145.62	85.668	89.7001	162.194	230.09	264.442	174.583	160.218	152.657	78.1582	76.2932	82.8921	270.17	255.252	290.387	245.118	261.601	218.866	BraA01g031100.3C	protein_coding	chrA01:21036156-21036827:+	gi|685264166|ref|XP_009108345.1|	851	5e-114	PREDICTED: auxin-responsive protein IAA2-like [Brassica rapa]	gi|685264165|ref|XM_009110097.1|	588	0	PREDICTED: Brassica rapa auxin-responsive protein IAA2-like (LOC103834036), mRNA	P49678	283
BraA01g031260.3C	282.472	348.7	288.679	100.211	94.0623	97.0046	174.034	181.017	178.163	133.829	140.567	132.969	52.457	52.9957	51.3823	20.0704	21.8963	25.4586	203.798	201.623	210.535	94.1124	101.244	98.0024	112.137	175.37	176.291	220.348	225.153	219.79	53.7314	55.6105	56.5845	245.598	234.186	167.711	BraA01g031260.3C	protein_coding	chrA01:21174160-21177213:+	gi|685264200|ref|XP_009108561.1|	4854	0	PREDICTED: putative calcium-transporting ATPase 13, plasma membrane-type [Brassica rapa]	gi|685264199|ref|XM_009110313.1|	3054	0	PREDICTED: Brassica rapa putative calcium-transporting ATPase 13, plasma membrane-type (LOC103834245), mRNA	Q9LIK7	1667
BraA01g031350.3C	10.4904	17.7421	12.8494	155.439	162.037	162.56	47.4342	52.9342	50.7881	21.0123	18.9116	16.5858	78.9442	82.9512	84.6458	24.2443	24.6991	92.7803	22.3426	20.6536	19.0723	42.3547	104.825	98.1592	51.1009	22.7749	23.7134	9.15537	8.61311	5.7511	51.9455	55.9395	61.3704	3.56033	2.76269	13.5523	BraA01g031350.3C	protein_coding	chrA01:21215612-21216506:+	gi|685264210|ref|XP_009108614.1|	802	4e-106	PREDICTED: early light-induced protein 1, chloroplastic-like [Brassica rapa]	gi|923928076|ref|XM_013877466.1|	585	0	PREDICTED: Brassica napus early light-induced protein 1, chloroplastic-like (LOC106436504), mRNA	P93735	283
BraA01g031380.3C	0.292964	0.573285	0.747595	0.743443	1.1658	1.03267	2.49654	3.35065	3.55772	8.0039	8.21554	7.80838	1.00514	1.33562	1.08105	0.206065	0.199521	1.05228	3.26836	1.55861	0.462201	1.40602	2.96175	1.83547	4.31942	2.05245	2.4239	26.4136	31.6385	29.1158	1.01548	1.93618	1.21981	0.348003	0.794227	1.46328	BraA01g031380.3C	protein_coding	chrA01:21237822-21239658:-	gi|685264214|ref|XP_009108632.1|	1818	0	PREDICTED: heat stress transcription factor A-6b-like [Brassica rapa]	gi|685264213|ref|XM_009110384.1|	1197	0	PREDICTED: Brassica rapa heat stress transcription factor A-6b-like (LOC103834305), mRNA	Q9LUH8	523
BraA01g031410.3C	0.625764	1.53065	0.830358	11.0292	12.7352	12.2345	6.15527	5.65894	8.05867	2.06444	2.09228	2.66856	3.23693	3.28917	3.63298	27.0251	26.3374	16.2648	1.77702	0.25365	1.05307	6.27338	10.1904	10.9775	4.56276	2.76528	1.8768	1.35651	1.39219	1.4778	3.87088	3.50702	4.90445	2.25971	2.71432	4.14545	BraA01g031410.3C	protein_coding	chrA01:21299762-21302783:-	gi|685264221|ref|XP_009108659.1|	1775	0	PREDICTED: uncharacterized protein LOC103834337 [Brassica rapa]	gi|685264220|ref|XM_009110411.1|	1338	0	PREDICTED: Brassica rapa uncharacterized LOC103834337 (LOC103834337), mRNA	Q8W4K5	297
BraA01g031440.3C	0.133745	0.0654293	0.0682586	0.246835	0.608244	0.502863	0	0	0	0.689425	0.504885	1.01848	0.352974	0.932545	0.592228	0.094073	0.273257	0.174687	26.4505	13.2821	14.278	43.719	35.3009	34.4314	27.6784	37.9841	32.8511	47.9699	48.3522	45.7324	58.6972	57.1359	55.5561	88.6499	56.8528	48.3788	BraA01g031440.3C	protein_coding	chrA01:21330892-21333439:+	gi|922572560|ref|XP_013614599.1|	1907	0	PREDICTED: leucine-rich repeat extensin-like protein 6 [Brassica oleracea var. oleracea]	gi|685264648|ref|XM_009112549.1|	1207	0	PREDICTED: Brassica rapa leucine-rich repeat extensin-like protein 6 (LOC103836304), mRNA	Q9LUI1	640
BraA01g031450.3C	1.00476	2.14944	0.90391	2.48295	2.45898	2.46516	2.08976	2.39161	2.84721	3.49385	3.21438	3.04327	1.65396	1.4249	1.50818	3.47374	3.01549	2.51347	1.6408	1.38059	1.43293	1.23504	1.34009	1.14454	0.821734	0.991172	1.14481	1.52701	1.73651	1.22328	0.544883	0.522227	0.517204	1.03573	0.683285	0.913274	BraA01g031450.3C	protein_coding	chrA01:21345773-21351103:+	gi|685264226|ref|XP_009108671.1|	8192	0	PREDICTED: myosin-4-like [Brassica rapa]	gi|685264225|ref|XM_009110423.1|	5091	0	PREDICTED: Brassica rapa myosin-4-like (LOC103834355), mRNA	Q9LUI2	2551
BraA01g031510.3C	16.5303	26.8597	17.0739	35.2292	35.0152	35.6078	33.156	32.8705	34.6796	17.955	17.7229	19.4815	29.3957	29.5535	29.0464	68.5165	75.4541	53.7195	12.6735	13.0619	10.349	16.0556	20.2172	18.3817	13.9269	11.1354	14.043	7.65931	7.93534	8.13287	6.19148	7.49126	5.591	25.62	18.2456	16.2439	BraA01g031510.3C	protein_coding	chrA01:21408945-21409835:+	gi|685309375|ref|XP_009145306.1|	1295	9e-178	PREDICTED: probable rRNA-processing protein EBP2 homolog [Brassica rapa]	gi|685264237|ref|XM_009110479.1|	888	0	PREDICTED: Brassica rapa probable rRNA-processing protein EBP2 homolog (LOC103834407), mRNA	Q9LUJ5	442
BraA01g031540.3C	25.4957	11.9622	28.1549	52.9703	53.0588	53.9568	78.2664	88.9898	80.3411	70.0934	68.8278	69.3352	57.6075	64.6149	61.62	4.82412	4.46784	14.4108	48.3888	27.9516	31.05	37.0502	23.4653	31.0809	53.8778	65.405	59.9834	34.9655	28.7482	33.7437	133.892	125.34	131.171	51.9991	51.8999	79.3309	BraA01g031540.3C	protein_coding	chrA01:21416170-21416982:-	gi|674898692|emb|CDY34242.1|	643	7e-82	BnaA01g24590D [Brassica napus]	gi|685264241|ref|XM_009110499.1|	304	5e-157	PREDICTED: Brassica rapa non-specific lipid-transfer protein-like protein At2g13820 (LOC103834428), mRNA	.	.
BraA01g031550.3C	42.9753	36.3294	34.3911	110.722	101.435	111.168	162.727	179.047	175.354	58.838	65.6342	63.1836	83.2948	93.6747	89.3127	12.333	18.9656	30.3108	80.3716	83.4408	78.8298	79.0167	64.6293	72.8437	71.5185	82.8193	83.38	25.2381	20.5562	24.3576	176.554	159.597	150.727	87.8858	96.7466	124.362	BraA01g031550.3C	protein_coding	chrA01:21417766-21418444:+	gi|685264244|ref|XP_009108758.1|	667	2e-86	PREDICTED: non-specific lipid-transfer protein-like protein At2g13820 [Brassica rapa]	gi|685264243|ref|XM_009110510.1|	510	0	PREDICTED: Brassica rapa non-specific lipid-transfer protein-like protein At2g13820 (LOC103834439), mRNA	Q9ZQI8	77.4
BraA01g031570.3C	1.00003	3.69638	1.2476	29.7351	31.583	28.0956	10.064	12.0581	14.184	15.4649	13.3028	15.2308	16.1874	16.0911	15.0887	89.4102	94.4409	22.7854	16.6785	5.62997	7.59644	53.327	55.1341	60.1223	21.8037	16.4073	20.685	19.4887	19.1584	22.3046	56.4093	60.1579	64.3353	16.5779	20.3633	20.447	BraA01g031570.3C	protein_coding	chrA01:21429268-21430181:+	gi|685264248|ref|XP_009108785.1|	1369	0	PREDICTED: uncharacterized protein LOC103834467 [Brassica rapa]	gi|923513002|ref|XM_013896189.1|	789	0	PREDICTED: Brassica napus uncharacterized LOC106453995 (LOC106453995), transcript variant X2, mRNA	Q8LGS1	123
BraA01g031580.3C	24.024	29.1188	25.437	36.0659	37.9136	35.3894	21.1271	24.9872	28.5566	13.1232	16.8232	13.4707	28.3895	27.8861	24.522	36.5702	35.8972	29.0366	19.6375	29.2503	29.605	32.3139	28.9997	36.9648	24.4147	21.8355	17.6146	8.12623	7.31254	6.17449	25.0486	36.2097	35.4798	19.7631	19.6359	15.0817	BraA01g031580.3C	protein_coding	chrA01:21434796-21435284:+	gi|685264258|ref|XP_009108819.1|	540	2e-67	PREDICTED: uncharacterized protein LOC103834498 [Brassica rapa]	gi|685264257|ref|XM_009110571.1|	489	0	PREDICTED: Brassica rapa uncharacterized LOC103834498 (LOC103834498), mRNA	.	.
BraA01g031750.3C	329.07	171.428	321.277	266.364	256.109	267.776	323.588	312.571	298.655	46.4332	49.7709	49.0345	176.992	181.734	179.197	27.4676	28.1024	75.0631	125.285	214.353	244.727	225.733	245.553	251.334	276.226	338.332	336.896	14.622	12.6096	12.4885	271.551	269.304	263.151	119.37	120.548	143.584	BraA01g031750.3C	protein_coding	chrA01:21581491-21584795:-	gi|685264659|ref|XP_009110882.1|	2389	0	PREDICTED: UDP-glycosyltransferase 82A1-like [Brassica rapa]	gi|685264658|ref|XM_009112634.1|	1347	0	PREDICTED: Brassica rapa UDP-glycosyltransferase 82A1-like (LOC103836380), mRNA	Q9LHJ2	744
BraA01g032000.3C	1.15122	0.606509	0.632737	6.70082	6.4437	5.99321	2.1561	1.79008	2.30086	8.94707	9.74231	8.63181	2.52408	2.37484	2.09134	0.249151	0.241239	1.04098	7.99331	5.20482	4.47075	9.5389	7.93633	8.37263	8.54603	9.83096	9.79958	17.9751	19.209	18.0375	17.7559	17.3235	15.6162	2.94537	4.6094	4.37655	BraA01g032000.3C	protein_coding	chrA01:21793534-21795238:-	gi|685264371|ref|XP_009109348.1|	1769	0	PREDICTED: peroxidase 30 [Brassica rapa]	gi|685264370|ref|XM_009111100.1|	990	0	PREDICTED: Brassica rapa peroxidase 30 (LOC103835007), mRNA	Q9LSY7	597
BraA01g032010.3C	0	0	0	0.183032	0	0	0	0	0.0746884	0	0.0713105	0	0	0	0.0650588	0	0	0	2.9504	5.29294	6.46716	4.79488	6.1421	4.59415	6.87678	8.33751	6.56428	2.54075	2.81928	2.34208	19.2504	16.0799	17.3592	29.1529	29.6822	30.1728	BraA01g032010.3C	protein_coding	chrA01:21807506-21808831:-	gi|685264374|ref|XP_009109358.1|	2280	0	PREDICTED: UDP-glycosyltransferase 71B2-like [Brassica rapa]	gi|685264373|ref|XM_009111110.1|	1326	0	PREDICTED: Brassica rapa UDP-glycosyltransferase 71B2-like (LOC103835016), mRNA	Q9LSY8	632
BraA01g032020.3C	0.819342	0.26722	1.1151	0.630063	0.310517	0.641797	0.398979	0.871707	0.308526	2.53412	2.06201	2.77307	1.29743	1.31837	2.5531	0	0	0.17836	1.24646	1.93734	2.01079	1.01947	1.94021	2.64444	3.07497	1.7662	2.54212	1.21101	3.16468	0.9406	4.80617	2.88799	5.48514	0.519077	0.59233	1.00515	BraA01g032020.3C	protein_coding	chrA01:21813354-21814513:-	gi|685264376|ref|XP_009109370.1|	970	4e-131	PREDICTED: uncharacterized protein LOC103835026 [Brassica rapa]	gi|923674401|ref|XM_013796230.1|	642	0	PREDICTED: Brassica napus uncharacterized LOC106356478 (LOC106356478), mRNA	Q9LSZ3	289
BraA01g032130.3C	0.0586811	0.0574148	0.179693	1.57035	0.934045	1.10317	0.514346	0.437021	0.397738	1.81493	1.26583	1.72788	0.185843	0.377685	0.288715	0	0.0799285	0.306579	0.357086	0.475721	0.802355	1.06392	1.8599	2.20588	0.880916	0.632475	0.48551	0.115643	0.271984	0.0577419	2.56598	2.23384	2.98945	0.501879	1.27268	1.04898	BraA01g032130.3C	protein_coding	chrA01:21921546-21923039:-	gi|685264389|ref|XP_009109433.1|	2570	0	PREDICTED: UDP-glycosyltransferase 84A2-like [Brassica rapa]	gi|685264388|ref|XM_009111185.1|	1494	0	PREDICTED: Brassica rapa UDP-glycosyltransferase 84A2-like (LOC103835086), mRNA	Q9LVF0	833
BraA01g032150.3C	3.29939	0.153724	3.84891	2.4647	2.85809	2.65828	0.765067	0.501466	1.2424	24.1347	30.5025	25.0456	10.1174	19.2132	16.0786	0.884084	1.28401	0.615631	4.78034	0.796066	1.98299	2.01075	1.202	0.715888	14.1515	8.29766	7.96198	9.44356	9.02987	9.58516	8.71344	9.96821	8.61971	0.298609	0	0.495629	BraA01g032150.3C	protein_coding	chrA01:21959834-21960391:+	gi|685264391|ref|XP_009109446.1|	967	2e-131	PREDICTED: uncharacterized protein LOC103835095 [Brassica rapa]	gi|685264390|ref|XM_009111198.1|	558	0	PREDICTED: Brassica rapa uncharacterized LOC103835095 (LOC103835095), mRNA	Q9LVF1	343
BraA01g032160.3C	0	0.2817	0	0	0	0.405944	1.96279	0.765786	0.813111	0.44524	0.465802	0.877	0.91182	1.23538	2.26648	0.607536	0.588242	2.63235	0.876003	0.7294	0.454232	0.460591	0.944007	0.163984	1.38926	1.39643	1.93546	0.992935	1.20102	1.13322	2.61007	2.58781	1.97447	5.74564	3.90267	7.56871	BraA01g032160.3C	protein_coding	chrA01:21962071-21962679:-	gi|685264393|ref|XP_009109458.1|	965	1e-130	PREDICTED: uncharacterized protein LOC103835105 [Brassica rapa]	gi|685264392|ref|XM_009111210.1|	609	0	PREDICTED: Brassica rapa uncharacterized LOC103835105 (LOC103835105), mRNA	Q9LVF4	331
BraA01g032470.3C	2.13367	1.24201	1.92979	1.79446	1.99598	2.10713	1.55191	1.66661	1.95267	2.17188	3.08784	2.52293	2.36649	1.73833	1.99325	7.4089	8.27726	4.44483	1.45177	1.50531	1.56239	1.00816	1.15122	1.13834	1.12947	0.873306	1.17317	1.8629	2.72899	3.26888	0.720132	1.1995	1.03194	1.2063	1.25939	1.53361	BraA01g032470.3C	protein_coding	chrA01:22192883-22198743:-	gi|923513363|ref|XP_013639875.1|	5245	0	PREDICTED: calcium-transporting ATPase 9, plasma membrane-type-like [Brassica napus]	gi|685264454|ref|XM_009111519.1|	2134	0	PREDICTED: Brassica rapa calcium-transporting ATPase 9, plasma membrane-type (LOC103835362), mRNA	Q9LU41	1923
BraA01g032550.3C	0	0	0	0	0	0	0	0	0	0.037287	0	0.0367226	0	0	0	0	0	0	0.330128	0.219903	0.418441	0.347154	0.197642	0.494388	0.310252	0.545745	0.299238	0.641475	0.637008	0.747358	0.270014	0.344199	0.212597	0.309326	0.549078	0.228186	BraA01g032550.3C	protein_coding	chrA01:22238380-22241799:-	gi|685264677|ref|XP_009111034.1|	3295	0	PREDICTED: uncharacterized protein LOC103836513 [Brassica rapa]	gi|685264676|ref|XM_009112786.1|	1937	0	PREDICTED: Brassica rapa uncharacterized LOC103836513 (LOC103836513), mRNA	.	.
BraA01g032750.3C	1.59493	2.3156	1.78554	0.997008	0.409467	0.386886	1.90405	1.58739	2.61541	2.97035	2.6636	2.03733	2.33547	2.64911	1.67068	0.361883	0.140156	1.00799	2.60899	2.50256	2.65155	2.0851	1.01215	1.58239	1.26886	0.9427	1.6495	5.32304	5.24623	3.29068	1.20718	0.924867	0.604854	3.47133	4.29596	3.35422	BraA01g032750.3C	protein_coding	chrA01:22331661-22334312:-	gi|685264539|ref|XP_009110086.1|	2526	0	PREDICTED: AP2-like ethylene-responsive transcription factor PLT1 [Brassica rapa]	gi|685264538|ref|XM_009111838.1|	1704	0	PREDICTED: Brassica rapa AP2-like ethylene-responsive transcription factor PLT1 (LOC103835650), mRNA	Q5YGP8	890
BraA01g032790.3C	1.92983	2.96716	1.68844	4.83365	5.32859	3.62797	2.95345	2.9331	2.49149	2.2738	2.08146	1.95946	2.91037	0.887203	3.25539	5.81744	4.88167	6.84163	11.7434	4.19061	6.08928	9.70284	13.2577	15.0742	2.66056	2.6743	6.55782	7.87791	5.36681	7.05323	6.76272	6.41351	6.21212	14.4093	12.5563	14.7847	BraA01g032790.3C	protein_coding	chrA01:22364114-22364431:+	gi|674935544|emb|CDX97794.1|	476	3e-59	BnaC04g41450D [Brassica napus]	gi|923904663|ref|XM_013867019.1|	243	2e-123	PREDICTED: Brassica napus peptidyl-prolyl cis-trans isomerase CYP19-1-like (LOC106426295), transcript variant X2, mRNA	Q38900	107
BraA01g032820.3C	89.9513	45.1643	84.2021	65.6757	70.8408	69.7859	10.5124	11.0172	12.2929	10.7664	9.37059	11.1381	24.2723	22.8755	21.7613	5.55539	7.05243	9.05513	52.868	94.0878	83.4405	54.2843	33.1858	33.0889	92.3125	79.2634	70.9742	12.9708	13.4228	13.3847	63.2705	58.8334	55.626	10.4244	12.181	9.87388	BraA01g032820.3C	protein_coding	chrA01:22376850-22378173:-	gi|674873402|emb|CDY60388.1|	1630	0	BnaA01g36810D [Brassica napus]	gi|685264548|ref|XM_009111889.1|	711	0	PREDICTED: Brassica rapa DNA-damage-repair/toleration protein DRT100-like (LOC103835696), mRNA	Q00874	376
BraA01g032880.3C	0.906785	1.97607	0.673151	3.11886	2.34311	3.02197	3.29162	3.42044	3.58526	3.69693	3.37865	3.38987	4.04661	3.58135	4.17753	4.7546	4.7159	2.96093	3.26061	2.00487	1.95083	4.43982	3.37859	3.00491	1.50269	1.68815	1.10832	3.57401	3.17128	3.73132	1.75838	2.00489	2.26131	1.01839	1.43028	1.73365	BraA01g032880.3C	protein_coding	chrA01:22416253-22419203:+	gi|685264565|ref|XP_009110219.1|	3296	0	PREDICTED: 65-kDa microtubule-associated protein 3 [Brassica rapa]	gi|685264564|ref|XM_009111971.1|	2109	0	PREDICTED: Brassica rapa 65-kDa microtubule-associated protein 3 (LOC103835782), mRNA	Q9FHM4	1106
BraA01g033050.3C	18.6372	9.91988	17.9583	43.3393	41.5317	40.3625	15.5371	14.7523	17.1799	40.7341	41.168	38.6037	44.0713	33.427	35.6515	9.4385	6.49868	6.23169	64.2663	54.6946	55.3569	51.0434	25.9096	23.7777	31.9749	37.6039	34.6948	43.9272	48.0979	42.1063	53.5887	47.6135	42.7986	16.0106	22.4738	18.8137	BraA01g033050.3C	protein_coding	chrA01:22556784-22558292:+	gi|923523337|ref|XP_013674920.1|	765	1e-100	PREDICTED: reactive Intermediate Deaminase A, chloroplastic-like [Brassica napus]	gi|923523336|ref|XM_013819466.1|	582	0	PREDICTED: Brassica napus reactive Intermediate Deaminase A, chloroplastic-like (LOC106379534), mRNA	Q94JQ4	209
BraA01g033070.3C	24.0347	1.56774	22.1187	8.73073	7.98102	9.89741	2.74945	1.70472	2.24104	17.9351	16.7883	19.2906	13.2904	17.5974	14.7909	0.536683	0.831424	0.697608	91.2359	129.975	109.544	44.4308	21.515	21.4682	57.5983	70.7249	72.914	32.2535	32.4651	35.813	93.9088	84.9588	84.768	30.5259	30.614	36.3452	BraA01g033070.3C	protein_coding	chrA01:22562980-22564792:-	gi|685384804|ref|XP_009124488.1|	2041	0	PREDICTED: probable inactive serine/threonine-protein kinase fnkC [Brassica rapa]	gi|685384803|ref|XM_009126240.1|	1146	0	PREDICTED: Brassica rapa probable inactive serine/threonine-protein kinase fnkC (LOC103849486), mRNA	Q9FPT1	68.6
BraA01g033080.3C	0	0.0833603	0.0869651	1.65102	2.3248	1.5216	0.414876	0.45322	0.769966	67.8975	71.9521	71.3681	1.52901	1.55368	3.10196	5.51328	9.63197	0.778961	1.20972	0.172674	0.179221	0.36346	0.0931163	0.485259	0.91357	0.0918287	0	1.42716	1.1057	1.84438	0.363467	0.630642	0.667749	0	0.184779	0.0895889	BraA01g033080.3C	protein_coding	chrA01:22565552-22567413:-	gi|923513664|ref|XP_013640854.1|	1715	0	PREDICTED: probable inactive serine/threonine-protein kinase fnkC [Brassica napus]	gi|685384800|ref|XM_009126239.1|	1025	0	PREDICTED: Brassica rapa probable inactive serine/threonine-protein kinase fnkC (LOC103849485), mRNA	Q9FPT1	60.8
BraA01g033190.3C	0.682254	0.111255	0.580331	0.367251	0.129281	0.106883	0.166112	0.302441	0.321131	0.293073	0.367929	0.692728	0.420135	0.365928	0.391618	0.0799804	0.309762	0.668331	1.84517	1.03705	1.07637	1.0308	0.559241	0.712406	0.731567	0.612787	0.470397	2.29689	1.95003	1.95806	1.03082	1.14227	1.0026	0.648341	0.431571	1.07611	BraA01g033190.3C	protein_coding	chrA01:22718585-22720199:-	gi|685264709|ref|XP_009111243.1|	2255	0	PREDICTED: cytochrome P450 705A20-like [Brassica rapa]	gi|685264708|ref|XM_009112995.1|	1542	0	PREDICTED: Brassica rapa cytochrome P450 705A20-like (LOC103836698), mRNA	Q9LJY5	604
BraA01g033200.3C	69.8466	104.63	76.3754	65.9351	70.6495	67.012	73.1841	76.1898	78.1775	58.9315	58.3626	65.5389	86.9561	77.3362	84.5299	108.422	99.2923	110.103	14.8191	17.7356	17.3948	8.73352	8.77442	12.6205	11.7077	14.8833	17.6024	29.2698	26.6431	25.7535	11.4737	14.9414	10.5395	30.212	21.939	16.3775	BraA01g033200.3C	protein_coding	chrA01:22726344-22727678:+	gi|685264711|ref|XP_009111254.1|	970	4e-132	PREDICTED: ubiquitin-conjugating enzyme E2 19-like [Brassica rapa]	gi|685264710|ref|XM_009113006.1|	546	0	PREDICTED: Brassica rapa ubiquitin-conjugating enzyme E2 19-like (LOC103836709), mRNA	Q9LJZ5	335
BraA01g033210.3C	3.56898	8.60889	4.29221	10.6954	11.5706	12.3892	10.8749	11.1657	11.0972	11.4027	11.5482	10.3331	12.7205	11.3337	12.1352	19.5856	19.8781	17.3076	8.45779	9.73991	9.03137	7.83878	12.0881	11.8745	4.58475	4.57034	5.66453	9.88853	9.99073	10.5356	4.25865	5.08174	4.46583	15.749	15.2509	12.9679	BraA01g033210.3C	protein_coding	chrA01:22728130-22735211:+	gi|674899519|emb|CDY33444.1|	2871	0	BnaC01g32810D [Brassica napus]	gi|685264712|ref|XM_009113015.1|	1635	0	PREDICTED: Brassica rapa T-complex protein 1 subunit alpha (LOC103836720), mRNA	P28769	1091
BraA01g033400.3C	0.103628	0.101392	0	0.28688	0.235641	0.438333	0.201848	0.165377	0.23413	0.480764	0.502967	0.368268	1.64095	1.72302	1.58056	3.93606	3.74049	1.55654	0.472949	0.525065	0.217989	0.11052	0.962697	0.472181	0.944508	0.335077	0.375108	0.561607	0.288187	0.305909	3.9788	3.28739	4.92391	0.984774	0.955184	1.41658	BraA01g033400.3C	protein_coding	chrA01:22846786-22849494:+	gi|685264759|ref|XP_009111493.1|	2700	0	PREDICTED: BTB/POZ domain-containing protein At3g19850 [Brassica rapa]	gi|685264758|ref|XM_009113245.1|	1692	0	PREDICTED: Brassica rapa BTB/POZ domain-containing protein At3g19850 (LOC103836925), mRNA	Q9LT24	822
BraA01g033430.3C	25.8433	30.3224	23.6191	31.861	35.7675	34.6538	39.3484	40.1084	40.0612	54.198	50.6439	55.4895	38.6996	38.5991	33.6169	35.3311	35.2715	38.3049	78.4197	66.3936	57.8632	40.1507	33.0187	32.6372	23.1949	23.9312	25.2755	44.3199	42.7553	45.4357	18.3565	19.2447	19.3582	14.2806	13.8713	14.0522	BraA01g033430.3C	protein_coding	chrA01:22865525-22867618:+	gi|685264767|ref|XP_009111528.1|	3008	0	PREDICTED: delta(24)-sterol reductase [Brassica rapa]	gi|685264766|ref|XM_009113280.1|	1686	0	PREDICTED: Brassica rapa delta(24)-sterol reductase (LOC103836950), mRNA	Q39085	1101
BraA01g033510.3C	0.30096	0.0588931	0.460799	0.13886	0.0684353	0.0848679	0.0879315	0.0640389	0.271986	0.434388	0.389527	0.488928	0.698968	0.451977	0.562681	0.338702	0.286952	0.275164	0.732559	1.06743	0.633087	0.12839	0.197357	0.102849	0.516341	0.454131	0.840393	0.622757	0.557974	0.296143	0	0.0636487	0.206394	0.4576	0.293725	0.537995	BraA01g033510.3C	protein_coding	chrA01:22911413-22914415:-	gi|685264781|ref|XP_009111593.1|	4712	0	PREDICTED: receptor-like protein kinase HAIKU2 [Brassica rapa]	gi|685264780|ref|XM_009113345.1|	2913	0	PREDICTED: Brassica rapa receptor-like protein kinase HAIKU2 (LOC103837012), mRNA	Q9LJM4	1367
BraA01g033520.3C	50.1147	74.7057	51.4075	25.5323	27.3579	30.1573	56.921	59.6019	62.4424	63.2044	63.5079	66.3513	37.1512	36.7503	36.9545	39.0107	38.0259	30.8601	74.3475	45.6176	47.2163	41.1135	56.8105	46.5335	37.6692	39.5391	37.1036	124.922	127.782	125.912	27.1885	28.666	25.8277	78.2895	77.4711	64.1386	BraA01g033520.3C	protein_coding	chrA01:22915801-22917210:-	gi|685264783|ref|XP_009111603.1|	1921	0	PREDICTED: uncharacterized protein LOC103837023 [Brassica rapa]	gi|685264782|ref|XM_009113355.1|	1410	0	PREDICTED: Brassica rapa uncharacterized LOC103837023 (LOC103837023), mRNA	.	.
BraA01g033540.3C	4.79784	3.8408	3.56167	13.6846	11.9016	13.9394	4.67262	6.4966	1.97088	0.44967	0.470437	1.32859	4.14402	4.67878	4.72113	1.22716	2.97048	5.12719	42.9089	68.0672	79.8228	62.7986	60.0642	61.1122	45.3662	62.5244	61.3482	12.8933	10.1081	15.0215	47.4487	54.4234	51.7045	13.6781	11.3515	20.6389	BraA01g033540.3C	protein_coding	chrA01:22939821-22940021:+	gi|674890509|emb|CDY42197.1|	317	1e-36	BnaA01g25980D [Brassica napus]	gi|923902075|ref|XM_013865891.1|	139	8e-66	PREDICTED: Brassica napus uncharacterized LOC106425161 (LOC106425161), mRNA	.	.
BraA01g033580.3C	33.7239	41.1212	31.8349	11.1728	12.1081	10.9041	17.2245	17.1303	18.547	7.12351	7.31575	6.17895	14.2539	15.2999	14.5339	27.6444	27.9753	26.6604	2.44306	3.98275	3.60036	1.75777	2.84055	2.67177	3.19472	1.91307	1.83567	2.12372	2.11546	1.62178	2.5015	2.07797	1.86311	6.02399	4.67439	6.53241	BraA01g033580.3C	protein_coding	chrA01:22952756-22955113:-	gi|685264793|ref|XP_009111645.1|	2131	0	PREDICTED: magnesium transporter MRS2-3-like isoform X2 [Brassica rapa]	gi|685264792|ref|XM_009113397.1|	1303	0	PREDICTED: Brassica rapa magnesium transporter MRS2-3-like (LOC103837061), transcript variant X2, mRNA	Q9LJN2	595
BraA01g033590.3C	159.136	216.285	156.824	44.8555	48.3577	50.5863	60.0207	58.7956	49.355	11.3352	10.6104	13.2201	34.2098	45.0043	43.8458	94.8377	88.6732	80.8732	73.6551	109.952	96.774	51.2245	45.2204	43.8357	45.2968	48.9611	43.6887	13.1146	19.5796	17.3672	40.4249	40.386	39.4013	202.093	203.316	138.737	BraA01g033590.3C	protein_coding	chrA01:22957535-22957837:+	gi|685264795|ref|XP_009111657.1|	458	6e-57	PREDICTED: uncharacterized protein LOC103837077 [Brassica rapa]	gi|685264794|ref|XM_009113409.1|	303	9e-157	PREDICTED: Brassica rapa uncharacterized LOC103837077 (LOC103837077), mRNA	.	.
BraA01g033650.3C	1.31636	1.28795	1.88111	19.9213	17.0617	18.8075	54.8698	51.5381	45.8008	3.79991	7.09893	8.55404	20.5666	13.8382	15.5438	8.88863	7.17197	4.12639	7.20927	10.4048	8.58403	36.5015	22.1558	13.4955	8.18674	12.4854	12.5249	1.29708	2.19646	1.03623	23.5861	30.6231	27.598	23.2673	23.6959	24.3617	BraA01g033650.3C	protein_coding	chrA01:22988115-22988770:+	gi|923523401|ref|XP_013675072.1|	584	1e-75	PREDICTED: uncharacterized protein LOC106379734 [Brassica napus]	gi|923523400|ref|XM_013819618.1|	333	2e-173	PREDICTED: Brassica napus uncharacterized LOC106379734 (LOC106379734), mRNA	.	.
BraA01g033670.3C	56.6974	56.1869	46.4916	24.2095	27.3425	26.4414	39.1066	46.8302	46.4312	30.4284	30.183	29.8198	25.3108	25.0939	21.2981	39.9822	34.742	32.3628	0.665195	0.664645	0.459896	0.621779	1.51331	0.996173	0.23443	0.157094	0.150738	0.861699	0.0675552	0.573676	0.233172	0.231183	0.713959	0.692534	0.553186	0	BraA01g033670.3C	protein_coding	chrA01:23002973-23007910:+	gi|674882209|emb|CDY50146.1|	327	4e-34	BnaA01g26060D [Brassica napus]	gi|685264814|ref|XR_626878.1|	462	0	PREDICTED: Brassica rapa uncharacterized LOC103837157 (LOC103837157), transcript variant X3, ncRNA	Q9LT72	124
BraA01g033780.3C	6.28525	0.887575	6.34942	6.15869	6.85134	5.78613	1.95626	1.44769	1.75675	3.87454	3.28471	4.40801	2.87294	4.17045	3.57059	0.0911528	0	0.253897	68.2794	55.7472	48.4558	28.6098	12.8889	12.2526	31.6828	38.3414	37.2594	26.1135	27.1497	24.4836	42.7773	41.5902	39.1675	3.14036	3.72406	3.20236	BraA01g033780.3C	protein_coding	chrA01:23085919-23087810:-	gi|674882220|emb|CDY50157.1|	2116	0	BnaA01g26170D [Brassica napus]	gi|923513872|ref|XM_013786029.1|	1312	0	PREDICTED: Brassica napus probable cysteine proteinase At3g19400 (LOC106346643), mRNA	Q9LT78	687
BraA01g033920.3C	1.70056	1.35694	1.97175	0.822713	0.769626	0.605247	1.52754	1.24715	1.49208	0.493621	0.49861	0.67055	0.662315	0.637583	0.503636	0.487745	0.562209	0.62537	0.803746	1.23808	1.1461	1.19736	1.13681	0.959168	0.77896	1.22786	1.40016	0.325368	0.704024	0.519873	0.528259	0.471378	0.2588	1.22379	1.50392	1.04166	BraA01g033920.3C	protein_coding	chrA01:23225324-23233244:+	gi|685264884|ref|XP_009112153.1|	8844	0	PREDICTED: transcription initiation factor TFIID subunit 1-like [Brassica rapa]	gi|685264883|ref|XM_009113905.1|	3392	0	PREDICTED: Brassica rapa transcription initiation factor TFIID subunit 1-like (LOC103837543), mRNA	Q8LRK9	2358
BraA01g033990.3C	25.6886	25.6901	23.773	12.2894	11.6253	12.2216	29.6899	30.2851	29.0907	17.439	16.8829	15.4447	20.2557	20.5149	19.3777	3.72919	5.07227	11.7887	4.54494	10.8733	11.3519	14.2707	12.2099	12.3665	16.7844	21.1569	21.2149	10.4483	10.8241	11.3656	10.232	9.7443	10.6357	55.3013	50.5802	34.0474	BraA01g033990.3C	protein_coding	chrA01:23281469-23282857:-	gi|674914676|emb|CDY18561.1|	2073	0	BnaA01g26340D [Brassica napus]	gi|685264894|ref|XM_009113967.1|	1386	0	PREDICTED: Brassica rapa notchless protein homolog 1-like (LOC103837607), mRNA	O48716	399
BraA01g034090.3C	1.21304	0.971069	0.900499	2.34051	2.75833	2.9542	2.20166	2.40514	2.36692	3.63808	4.69815	4.87066	6.98489	6.15128	6.34802	22.4165	23.6573	42.058	2.01316	3.85536	3.24762	4.17516	4.39913	4.8363	7.50868	7.96346	7.86939	1.46692	1.27781	1.73618	8.70332	10.7864	9.61528	21.4305	22.0632	27.4821	BraA01g034090.3C	protein_coding	chrA01:23379329-23382135:+	gi|685264910|ref|XP_009112300.1|	2598	0	PREDICTED: polyol transporter 5 [Brassica rapa]	gi|685264909|ref|XM_009114052.1|	1590	0	PREDICTED: Brassica rapa polyol transporter 5 (LOC103837684), mRNA	Q8VZ80	875
BraA01g034170.3C	1.11326	2.7231	1.27839	11.9424	14.0812	10.8568	10.7066	9.47532	8.17447	3.01279	2.40147	7.06472	3.67261	4.62754	3.97106	4.30675	2.65363	0.363515	4.93969	3.80747	2.92727	7.71747	7.14823	7.9259	9.1022	7.64933	6.62028	3.15375	3.99894	3.01248	13.8027	12.9492	12.1336	4.36395	4.9798	5.70681	BraA01g034170.3C	protein_coding	chrA01:23438154-23438783:-	gi|685264929|ref|XP_009112407.1|	1123	2e-154	PREDICTED: RING-H2 finger protein ATL77-like [Brassica rapa]	gi|685264928|ref|XM_009114159.1|	630	0	PREDICTED: Brassica rapa RING-H2 finger protein ATL77-like (LOC103837782), mRNA	Q9LS99	322
BraA01g034180.3C	3.50678	1.27826	4.28134	1.33247	1.25084	1.29265	1.74111	0.804705	0.699084	0.850669	0.593304	1.25669	1.16141	1.77023	0.879595	2.12804	1.77949	1.70638	19.3171	17.8379	17.7909	15.6933	22.3197	25.0645	15.4834	14.2293	13.227	19.5807	19.2496	21.3129	13.9336	14.3964	14.8875	32.2793	31.0931	29.9336	BraA01g034180.3C	protein_coding	chrA01:23443405-23448672:-	gi|674914657|emb|CDY18542.1|	617	3e-73	BnaA01g26530D [Brassica napus]	gi|923513964|ref|XR_001270567.1|	295	1e-151	PREDICTED: Brassica napus uncharacterized LOC106346830 (LOC106346830), transcript variant X5, ncRNA	Q38932	151
BraA01g034200.3C	8.19966	9.32874	8.80759	8.6663	7.69657	8.11072	11.0035	10.296	10.9861	5.01312	5.55315	6.87341	8.80708	7.56848	7.59946	14.6869	15.1296	16.1269	1.93397	2.5604	2.40676	2.99973	3.12616	4.77881	1.89137	1.64423	2.07075	1.0804	1.85606	0.84437	2.84726	3.07502	2.1484	7.56557	6.92726	5.61443	BraA01g034200.3C	protein_coding	chrA01:23460000-23462368:+	gi|937575357|ref|NP_001302931.1|	2902	0	probable serine/threonine-protein kinase WNK6 [Brassica napus]	gi|685264956|ref|XM_009114257.1|	1745	0	PREDICTED: Brassica rapa probable serine/threonine-protein kinase WNK6 (LOC103837871), mRNA	Q8S8Y8	997
BraA01g034220.3C	0	0	0	0.561806	0	0.858403	0.592927	0.323863	0.343878	0.627664	0.328326	0	0	0	0.898624	1.28468	0.829258	0	1.54365	0.308475	0	3.57118	2.99427	4.85461	0.652822	0.328096	0.944469	0.599898	0.564367	0.299536	3.24659	2.25323	2.38581	0.867832	1.3204	0.640187	BraA01g034220.3C	protein_coding	chrA01:23467114-23467401:-	gi|685264961|ref|XP_009112527.1|	280	3e-30	PREDICTED: protein IDA-LIKE 4-like [Brassica rapa]	gi|685264960|ref|XM_009114279.1|	288	2e-148	PREDICTED: Brassica rapa protein IDA-LIKE 4-like (LOC103837889), mRNA	Q6DUW6	86.7
BraA01g034230.3C	2.68232	6.97549	1.29691	2.54034	1.44458	1.52605	1.58114	2.17786	4.22621	3.12922	4.11121	3.15353	2.45905	2.27158	1.66701	13.604	13.0758	7.37567	2.93518	2.07439	2.45	4.89332	3.47162	4.90487	1.74086	2.13025	2.19007	8.90284	9.35704	8.96004	4.89342	3.35885	4.56416	4.76259	4.66925	5.4184	BraA01g034230.3C	protein_coding	chrA01:23476749-23477990:+	gi|685264963|ref|XP_009112538.1|	1771	0	PREDICTED: U-box domain-containing protein 29-like [Brassica rapa]	gi|685264962|ref|XM_009114290.1|	1242	0	PREDICTED: Brassica rapa U-box domain-containing protein 29-like (LOC103837900), mRNA	Q9LSA6	476
BraA01g034240.3C	35.5236	65.4482	41.3228	21.0291	22.0994	21.0427	42.1685	45.638	45.2783	51.5491	52.9176	58.1187	35.0953	40.5509	34.8238	46.9558	48.7513	44.6474	14.2752	13.9918	12.1254	7.43426	5.42082	7.02424	9.63062	12.859	14.0024	24.7004	27.8352	28.096	14.2969	14.3167	14.7089	24.5859	12.6468	12.2634	BraA01g034240.3C	protein_coding	chrA01:23483019-23483672:+	gi|685264965|ref|XP_009112548.1|	985	3e-133	PREDICTED: protein MKS1-like [Brassica rapa]	gi|685264964|ref|XM_009114300.1|	654	0	PREDICTED: Brassica rapa protein MKS1-like (LOC103837909), mRNA	Q8LGD5	291
BraA01g034450.3C	0.633756	1.27461	0.718772	0.09747	0.080061	0.297856	0.342898	0.187295	0.238643	0.617077	0.645575	0.822232	0.26018	0.339916	0.277166	0.14859	0.0959142	0.229934	3.82082	3.96038	5.07335	1.68976	2.07795	1.123	2.03869	2.61845	3.0223	6.62634	7.01719	6.75581	1.08898	0.483999	1.1038	5.58758	4.12347	3.03588	BraA01g034450.3C	protein_coding	chrA01:23616119-23620279:-	gi|685265009|ref|XP_009112754.1|	3599	0	PREDICTED: chloroplastic group IIA intron splicing facilitator CRS1, chloroplastic [Brassica rapa]	gi|685265008|ref|XM_009114506.1|	2290	0	PREDICTED: Brassica rapa chloroplastic group IIA intron splicing facilitator CRS1, chloroplastic (LOC103838086), mRNA	A7XN92	504
BraA01g034510.3C	0	0	0	0	0	0	0	0	0	0	0	0	0	0	0	0	0	0	2.91522	3.30119	2.62015	2.8612	3.14153	4.03831	4.00683	1.85885	3.27003	3.39877	1.86519	2.92269	3.16782	2.63422	2.72217	7.8304	6.64963	8.36231	BraA01g034510.3C	protein_coding	chrA01:23647043-23647957:+	gi|923514055|ref|XP_013642132.1|	1627	0	PREDICTED: F-box protein At1g11270-like [Brassica napus]	gi|685265026|ref|XM_009114585.1|	912	0	PREDICTED: Brassica rapa F-box protein At1g11270-like (LOC103838158), mRNA	.	.
BraA01g034550.3C	4.67571	5.33728	4.77264	0.359556	0.443004	1.09876	4.93315	7.87636	3.08115	4.01705	3.78231	5.93437	13.574	8.7774	12.2692	4.38506	6.36871	12.2141	1.18552	5.13303	5.32764	2.49334	0.425852	0	0	2.09982	4.02974	12.2859	11.5582	7.66813	1.66226	3.29615	0	9.25687	10.1407	9.83327	BraA01g034550.3C	protein_coding	chrA01:23658346-23658570:+	gi|685265031|ref|XP_009112854.1|	295	4e-33	PREDICTED: uncharacterized protein LOC103838180 [Brassica rapa]	gi|923523487|ref|XM_013819856.1|	225	1e-113	PREDICTED: Brassica napus uncharacterized LOC106380025 (LOC106380025), mRNA	.	.
BraA01g034620.3C	0	0	0	0	0	0	0	0	0	0	0	0	0	0	0	0	0	0	1.36044	1.26222	0.906975	1.12404	1.36133	1.85544	1.74657	1.65231	1.58547	1.13292	0.799366	0.565682	1.63501	1.31711	1.50189	5.55412	5.71453	5.54129	BraA01g034620.3C	protein_coding	chrA01:23714353-23715267:-	gi|923514035|ref|XP_013642044.1|	1561	0	PREDICTED: F-box protein At1g11270-like [Brassica napus]	gi|923514054|ref|XM_013786678.1|	912	0	PREDICTED: Brassica napus F-box protein At1g11270-like (LOC106347178), mRNA	.	.
BraA01g034680.3C	0.907905	1.33247	0.926727	5.34098	4.64509	5.81381	3.26052	3.56187	3.78199	20.8263	23.3181	23.507	30.3707	28.487	27.1925	19.8764	18.2405	31.0541	8.28716	5.69272	3.81967	4.29677	2.66674	3.49047	7.24062	3.36378	3.6385	13.0277	14.6231	11.2789	6.65709	6.3603	9.50619	1.02455	0.922999	3.1624	BraA01g034680.3C	protein_coding	chrA01:23747770-23750431:-	gi|685265155|ref|XP_009113523.1|	2540	0	PREDICTED: beta-glucosidase 44 [Brassica rapa]	gi|685265154|ref|XM_009115275.1|	1545	0	PREDICTED: Brassica rapa beta-glucosidase 44 (LOC103838824), mRNA	Q9LV33	889
BraA01g034690.3C	7.48545	8.67152	8.49638	20.3908	18.4509	19.0819	8.51482	11.6591	10.4178	26.4236	23.2519	26.1453	25.35	24.6672	25.3972	42.4578	47.0638	41.6888	31.3994	12.0761	14.0455	41.1937	69.31	71.6937	31.4639	23.3648	20.9951	17.0528	18.0412	16.2044	34.1691	35.1441	39.7179	47.5173	36.1704	40.993	BraA01g034690.3C	protein_coding	chrA01:23754677-23757145:-	gi|674914609|emb|CDY18494.1|	2392	0	BnaA01g27010D [Brassica napus]	gi|685265156|ref|XM_009115283.1|	1095	0	PREDICTED: Brassica rapa beta-glucosidase 43 (LOC103838831), mRNA	Q9LV33	805
BraA01g034860.3C	39.3997	41.5097	35.093	40.3549	39.714	37.0345	11.3842	12.29	13.5933	35.7281	34.8566	39.5159	27.5109	26.8485	25.7112	14.5094	12.0818	16.525	61.0196	80.2007	65.1611	25.3	18.7876	18.72	41.4365	31.9419	32.4986	27.5756	28.3644	26.5904	46.9343	42.5349	42.7762	10.8469	8.8731	11.207	BraA01g034860.3C	protein_coding	chrA01:23883590-23885348:-	gi|685265200|ref|XP_009113731.1|	2287	0	PREDICTED: dihydropyrimidine dehydrogenase [NADP(+)]-like [Brassica rapa]	gi|685265199|ref|XM_009115483.1|	1275	0	PREDICTED: Brassica rapa dihydropyrimidine dehydrogenase [NADP(+)]-like (LOC103839011), mRNA	Q9LVI9	810
BraA01g034870.3C	55.909	22.0865	49.4769	33.345	29.7436	31.3343	20.195	17.221	19.4713	22.2802	19.0625	19.4555	14.686	17.2695	15.2389	2.70784	2.02597	9.02802	14.9965	25.1805	26.3192	25.3813	28.0183	31.7938	16.7935	19.4265	16.4688	6.29354	8.67841	7.74849	22.489	24.1475	21.1723	11.4741	8.82376	5.70418	BraA01g034870.3C	protein_coding	chrA01:23886458-23887697:-	gi|674885661|emb|CDY46881.1|	1794	0	BnaA01g27810D [Brassica napus]	gi|685265201|ref|XM_009115493.1|	996	0	PREDICTED: Brassica rapa purple acid phosphatase 17-like (LOC103839022), mRNA	Q9SCX8	602
BraA01g035190.3C	0	0	0	0	0	0	0	0	0	0	0	0	0	0	0	0	0	0	0	0	0	0	0	0	0.129485	0	0.124889	0.118988	0.335822	0.237649	0	0	0	1.49181	0.523796	1.01583	BraA01g035190.3C	protein_coding	chrA01:24098869-24100532:+	gi|674883771|emb|CDY48706.1|	1082	5e-143	BnaCnng16830D [Brassica napus]	gi|685265250|ref|XM_009115732.1|	624	0	PREDICTED: Brassica rapa probable LRR receptor-like serine/threonine-protein kinase At1g51880 (LOC103839224), mRNA	Q9C821	337
BraA01g035280.3C	201.892	57.1852	222.355	641.588	637.859	634.016	200.74	176.208	194.387	611.198	597.026	608.348	1246.21	1231.64	1290.08	640.438	662.127	643.45	215.892	109.36	116.393	294.422	302.041	310.752	706.638	521.463	500.904	160.493	165.563	167.643	508.96	489.011	506.979	573.315	547.732	550.548	BraA01g035280.3C	protein_coding	chrA01:24145751-24146932:+	gi|685265271|ref|XP_009114068.1|	2010	0	PREDICTED: S-adenosylmethionine synthase 2 [Brassica rapa]	gi|685265270|ref|XM_009115820.1|	1182	0	PREDICTED: Brassica rapa S-adenosylmethionine synthase 2 (LOC103839308), mRNA	Q9FUZ1	769
BraA01g035610.3C	40.9437	9.17409	34.2954	13.1228	14.0364	11.7514	10.3493	11.8046	11.8279	10.15	9.27037	11.1071	15.3425	15.2548	12.4558	1.0992	1.06429	3.06169	16.6417	15.9945	13.9711	12.8333	9.223	9.79082	33.849	28.8023	29.4149	19.2481	18.8324	18.914	17.3337	15.3681	18.9844	4.75219	4.74497	4.60113	BraA01g035610.3C	protein_coding	chrA01:24376225-24376973:-	gi|685265310|ref|XP_009114229.1|	988	9e-135	PREDICTED: protein LURP-one-related 13 [Brassica rapa]	gi|685265309|ref|XM_009115981.1|	561	0	PREDICTED: Brassica rapa protein LURP-one-related 13 (LOC103839475), mRNA	.	.
BraA01g035640.3C	15.0491	38.8654	11.4761	9.12346	8.25659	7.64853	25.4355	28.5776	24.611	47.1763	48.2698	44.5966	19.4428	19.3343	19.1563	13.97	13.1092	7.99951	35.8497	17.4667	18.6351	11.8975	14.2004	14.5514	29.6936	39.6545	36.5572	176.65	177.989	177.699	25.8017	25.3965	28.2012	81.7736	79.319	56.4438	BraA01g035640.3C	protein_coding	chrA01:24384447-24386855:+	gi|685265303|ref|XP_009114205.1|	3370	0	PREDICTED: COBRA-like protein 8 [Brassica rapa]	gi|685265302|ref|XM_009115957.1|	2004	0	PREDICTED: Brassica rapa COBRA-like protein 8 (LOC103839446), mRNA	Q9LIB6	976
BraA01g035730.3C	72.5789	52.3807	73.5946	160.363	165.582	158.509	117.808	118.247	120.82	72.8502	77.5064	77.5846	121.756	136.44	126.22	248.176	266.559	229.484	25.3867	11.0444	11.7151	30.1448	36.7821	35.1988	17.8509	13.4251	12.1388	16.9938	20.9834	20.2703	34.4884	31.5347	38.9552	35.3962	37.534	37.2778	BraA01g035730.3C	protein_coding	chrA01:24442031-24442996:-	gi|685265377|ref|XP_009114507.1|	1091	2e-148	PREDICTED: ethylene-responsive transcription factor RAP2-3 [Brassica rapa]	gi|685265376|ref|XM_009116259.1|	732	0	PREDICTED: Brassica rapa ethylene-responsive transcription factor RAP2-3 (LOC103839768), mRNA	P42736	320
BraA01g035820.3C	0.636545	0.226476	0.354404	2.40297	2.82909	2.01257	2.42337	2.21638	2.74558	2.74432	1.81002	2.17398	1.46614	1.61395	2.22076	3.82607	3.70457	2.87213	0.410825	0.70369	0.912962	1.35776	0.885435	1.05469	0.930756	0.873191	1.37649	2.05272	1.55564	1.48048	0.493739	0.428337	0.510233	1.9247	1.50604	1.64294	BraA01g035820.3C	protein_coding	chrA01:24476098-24477612:-	gi|685265388|ref|XP_009114567.1|	2666	0	PREDICTED: putative pentatricopeptide repeat-containing protein At3g16710, mitochondrial isoform X1 [Brassica rapa]	gi|685265387|ref|XM_009116319.1|	1515	0	PREDICTED: Brassica rapa putative pentatricopeptide repeat-containing protein At3g16710, mitochondrial (LOC103839829), transcript variant X1, mRNA	Q9LUR2	711
BraA01g035840.3C	22.4212	10.7222	23.9146	16.3892	16.8991	16.1025	9.93664	13.5353	12.9488	26.232	26.9001	29.7997	22.8715	24.5918	25.7812	3.01236	3.94613	3.61948	42.1577	45.0587	40.0103	25.3901	20.3748	18.3662	34.9822	39.1	43.3805	40.338	39.7003	38.7951	42.452	46.3522	34.3063	5.02744	5.32714	6.88753	BraA01g035840.3C	protein_coding	chrA01:24482489-24484143:+	gi|685265402|ref|XP_009114620.1|	1189	8e-164	PREDICTED: bidirectional sugar transporter SWEET16 [Brassica rapa]	gi|685265401|ref|XM_009116372.1|	696	0	PREDICTED: Brassica rapa bidirectional sugar transporter SWEET16 (LOC103839885), mRNA	Q9LUR4	404
BraA01g035950.3C	1125.48	182.183	1124.26	787.284	850.921	821.15	599.685	701.609	677.482	1673.03	1644.02	1644.03	1258.02	1265.57	1255.34	81.1284	90.8809	116.196	325.495	278.054	260.035	204.928	100.056	124.317	677.456	733.078	708.77	581.763	561.45	576.128	545.014	545.561	563.727	58.7361	66.7446	70.16	BraA01g035950.3C	protein_coding	chrA01:24565577-24567374:+	gi|685265434|ref|XP_009114745.1|	493	7e-58	PREDICTED: PYK10-binding protein 1 [Brassica rapa]	gi|685265433|ref|XM_009116497.1|	328	1e-170	PREDICTED: Brassica rapa PYK10-binding protein 1 (LOC103840010), mRNA	O04314	154
BraA01g036000.3C	0.165336	0.0606632	0.23205	0.47678	0.704922	0.369101	0.181149	0.241867	0.0700402	0.80966	1.20371	1.28004	0.305445	0.332544	0.488079	0.174441	0.140751	0.701837	0.524012	0.0837727	0.0869487	0.484913	0.655041	0.659184	0.753469	0.356405	0.235115	0.610929	0.708852	1.03715	0.484923	0.568202	0.344205	1.2373	1.3895	0.717154	BraA01g036000.3C	protein_coding	chrA01:24619211-24627687:-	gi|685265448|ref|XP_009114810.1|	7042	0	PREDICTED: ABC transporter G family member 29 [Brassica rapa]	gi|685265447|ref|XM_009116562.1|	4242	0	PREDICTED: Brassica rapa ABC transporter G family member 29 (LOC103840078), mRNA	Q94A18	2477
BraA01g036030.3C	3.50678	0.686222	1.90906	27.1824	24.3209	25.3813	4.89521	4.85018	7.39475	84.8401	83.5891	79.2832	43.8069	41.3792	49.8054	73.8334	66.8714	34.3522	22.2879	4.97509	5.77844	20.8193	30.5336	26.4979	36.7251	18.6464	21.7606	63.6948	56.2381	58.5462	61.5866	55.7462	59.0918	12.6634	11.2815	16.4707	BraA01g036030.3C	protein_coding	chrA01:24634646-24636003:-	gi|674913072|emb|CDY20190.1|	1136	4e-155	BnaA01g28120D [Brassica napus]	gi|923910739|ref|XM_013869688.1|	738	0	PREDICTED: Brassica napus aquaporin TIP2-1 (LOC106428943), mRNA	Q41951	427
BraA01g036040.3C	24.1409	41.9804	25.7388	20.3378	21.7798	20.4409	33.4577	39.4095	37.263	22.6211	21.9791	24.2138	36.0604	36.4327	38.5657	17.8739	20.5678	38.5521	16.3059	22.7302	24.4144	24.3913	29.5355	31.7858	26.2526	29.6538	30.3241	40.2072	41.9481	39.4787	24.913	27.956	26.5711	56.2843	63.8562	58.6317	BraA01g036040.3C	protein_coding	chrA01:24640856-24647593:-	gi|674870944|emb|CDY63820.1|	1437	0	BnaC01g44570D [Brassica napus]	gi|685265458|ref|XM_009116591.1|	778	0	PREDICTED: Brassica rapa uncharacterized LOC103840113 (LOC103840113), mRNA	.	.
BraA01g036090.3C	0.825514	2.34233	0.505577	0.228531	0.469284	0.232787	0.964763	1.75655	0.55953	0	0	0.251456	0.435733	0.442766	0.243695	0.348389	0.112442	0.323467	1.50702	1.58943	1.997	1.76083	2.25557	1.97476	0.531109	1.60156	2.30515	1.70818	0.459146	1.54337	1.05652	0.436461	0.889625	4.2362	3.84931	4.60067	BraA01g036090.3C	protein_coding	chrA01:24669425-24670988:+	gi|674913066|emb|CDY20184.1|	1296	3e-176	BnaA01g28180D [Brassica napus]	gi|685265481|ref|XM_009116686.1|	397	0	PREDICTED: Brassica rapa protein tesmin/TSO1-like CXC 8 (LOC103840202), mRNA	Q700D0	263
BraA01g036100.3C	587.691	1777.92	626.867	444.289	431.827	445.653	461.13	403.609	355.743	18.853	26.7817	21.6623	86.0202	84.2353	74.7126	53.342	53.4795	127.504	438.662	719.357	719.571	720.658	656.021	659.036	290.862	343.668	324.109	85.5904	81.6844	79.9156	210.427	222.187	225.174	523.382	560.498	458.861	BraA01g036100.3C	protein_coding	chrA01:24671116-24672384:-	gi|685265480|ref|XP_009114923.1|	1712	0	PREDICTED: probable isoaspartyl peptidase/L-asparaginase 2 [Brassica rapa]	gi|685265479|ref|XM_009116675.1|	978	0	PREDICTED: Brassica rapa probable isoaspartyl peptidase/L-asparaginase 2 (LOC103840193), mRNA	Q8GXG1	621
BraA01g036110.3C	71.6569	164.701	67.4218	48.2076	50.0656	47.6002	22.0276	12.1382	15.3756	1.65084	1.29531	0.812927	7.81813	5.58249	5.90876	3.66047	1.6358	20.6531	45.6752	102.634	91.1565	49.5252	47.6896	49.9332	6.00954	9.70806	11.7994	23.8644	24.492	24.6194	8.32551	8.04284	8.82424	122.875	121.549	84.8204	BraA01g036110.3C	protein_coding	chrA01:24675659-24676355:+	gi|685265484|ref|XP_009114947.1|	546	7e-69	PREDICTED: photosystem I reaction center subunit VI-1, chloroplastic-like [Brassica rapa]	gi|685265483|ref|XM_009116699.1|	438	0	PREDICTED: Brassica rapa photosystem I reaction center subunit VI-1, chloroplastic-like (LOC103840210), mRNA	Q9SUI7	197
BraA01g036180.3C	3.73674	11.2495	5.6724	19.4514	22.7675	19.0931	19.969	15.9022	18.1838	19.3609	18.3948	16.3438	63.0148	61.6679	62.886	20.0832	17.4878	15.8934	14.6733	10.6803	11.8915	11.0361	9.63403	11.7875	20.856	21.067	24.1784	22.092	20.6947	22.4387	23.8098	24.8225	27.6911	103.707	94.0299	74.7571	BraA01g036180.3C	protein_coding	chrA01:24708127-24709041:+	gi|685265502|ref|XP_009115047.1|	1589	0	PREDICTED: probable pyridoxal biosynthesis protein PDX1.2 [Brassica rapa]	gi|685265501|ref|XM_009116799.1|	915	0	PREDICTED: Brassica rapa probable pyridoxal biosynthesis protein PDX1.2 (LOC103840299), mRNA	Q9ZNR6	544
BraA01g036190.3C	12.4469	5.11843	12.3367	5.9926	7.99869	5.76508	8.08138	4.41414	6.92851	6.88106	8.17166	9.15798	8.37899	7.3532	11.0054	1.01506	0.245706	0	6.7692	8.77441	7.20977	5.00206	2.16869	2.26035	13.3466	6.41611	10.2609	12.6201	12.5415	10.1177	8.2728	10.682	8.48289	0.857118	0.78246	0.75874	BraA01g036190.3C	protein_coding	chrA01:24709832-24710624:+	gi|685265509|ref|XP_009115070.1|	843	2e-113	PREDICTED: uncharacterized protein LOC103840322 [Brassica rapa]	gi|685265508|ref|XM_009116822.1|	486	0	PREDICTED: Brassica rapa uncharacterized LOC103840322 (LOC103840322), mRNA	Q9AST8	91.7
BraA01g036260.3C	0	0	0	0	0.0841147	0	0.432311	0.157422	0	0.0762731	0	0	0	0	0	0	0.100771	0.0966307	0.150066	0.299885	0	0	0	0.0842754	0.0793302	0.23922	0.38257	0.291596	0.137163	0.0727987	0.0789045	0.0782315	0.0724804	0.703053	0.882496	1.40031	BraA01g036260.3C	protein_coding	chrA01:24767714-24770269:+	gi|685265713|ref|XP_009116171.1|	1619	0	PREDICTED: uncharacterized protein LOC103841390 [Brassica rapa]	gi|685265712|ref|XM_009117923.1|	1185	0	PREDICTED: Brassica rapa uncharacterized LOC103841390 (LOC103841390), mRNA	F4J1D9	239
BraA01g036270.3C	158.253	47.3598	163.857	128.567	130.109	132.591	133.015	134.24	133.967	96.6401	96.7785	96.6811	168.168	164.257	161.09	22.3589	22.4361	39.5845	130.312	122.737	122.11	103.863	82.6305	82.7488	161.093	151.14	149.882	70.1191	66.5018	68.672	159.188	159.205	151.925	46.7878	51.9021	55.5705	BraA01g036270.3C	protein_coding	chrA01:24772287-24776982:+	gi|685265523|ref|XP_009115122.1|	2992	0	PREDICTED: uncharacterized protein LOC103840367 isoform X2 [Brassica rapa]	gi|923735495|ref|XR_001274832.1|	834	0	PREDICTED: Brassica napus TSA1-like protein (LOC106374079), misc_RNA	Q9LSB4	899
BraA01g036280.3C	0.681723	0.53361	0.788637	1.38398	1.03345	1.068	1.72622	0.918704	1.18084	0.890248	0.686267	0.599897	0.575737	1.0238	0.491937	1.53443	0.680946	1.18722	0.230467	0.644776	0.812626	0.872473	0.59606	0.880108	0.925931	0.538833	0.423028	0.761302	0.884731	0.804975	0.29083	0.240291	0.222626	0.561459	0.394272	0.43011	BraA01g036280.3C	protein_coding	chrA01:24779701-24781629:-	gi|685265529|ref|XP_009115151.1|	3461	0	PREDICTED: putative pentatricopeptide repeat-containing protein At3g15930 [Brassica rapa]	gi|685265528|ref|XM_009116903.1|	1929	0	PREDICTED: Brassica rapa putative pentatricopeptide repeat-containing protein At3g15930 (LOC103840397), mRNA	Q9LSB8	1112
BraA01g036400.3C	5.06933	6.56462	5.40271	5.98496	5.93309	6.44678	4.93703	5.39332	4.96869	6.99397	5.46763	5.67701	3.46275	2.79891	3.74121	5.55823	5.17863	7.30276	2.87308	2.03971	2.27387	6.28104	4.64418	4.24602	3.59718	3.53541	3.23818	4.33396	4.35369	3.74115	6.28116	4.41449	4.01693	2.33783	1.85934	2.82205	BraA01g036400.3C	protein_coding	chrA01:24818100-24820228:-	gi|685265550|ref|XP_009115255.1|	1961	0	PREDICTED: glucan endo-1,3-beta-glucosidase 14 [Brassica rapa]	gi|685265549|ref|XM_009117007.1|	1176	0	PREDICTED: Brassica rapa glucan endo-1,3-beta-glucosidase 14 (LOC103840495), mRNA	Q9ZQG9	327
BraA01g036500.3C	18.0015	31.1087	19.9258	28.8004	28.7067	33.0726	29.5989	32.4589	29.447	38.0816	31.2671	33.2325	35.5391	29.467	31.2865	90.6063	72.6032	80.6132	27.8598	23.0986	20.1631	21.1933	24.9123	22.7695	10.4034	7.30736	10.2758	19.12	17.229	18.1735	13.3396	13.8438	13.0552	17.4399	11.7885	11.3083	BraA01g036500.3C	protein_coding	chrA01:24869370-24871338:-	gi|674913026|emb|CDY20144.1|	1032	3e-139	BnaA01g28580D [Brassica napus]	gi|923515047|ref|XM_013789631.1|	727	0	PREDICTED: Brassica napus biotin carboxyl carrier protein of acetyl-CoA carboxylase-like (LOC106349643), mRNA	.	.
BraA01g036510.3C	1.22492	10.1016	0.893085	13.0797	17.7069	15.955	12.9521	9.30865	13.4421	31.5711	23.9697	28.6058	17.5494	17.0818	16.8748	77.7888	74.6035	53.0254	14.9078	5.49714	6.44176	14.7435	14.7263	19.5347	12.5717	6.0354	7.23905	29.6572	24.8186	26.0005	19.4096	17.7637	18.3436	3.6584	2.84638	9.3843	BraA01g036510.3C	protein_coding	chrA01:24873108-24873761:-	gi|685265566|ref|XP_009115315.1|	595	1e-75	PREDICTED: RNA-binding protein cabeza [Brassica rapa]	gi|923515045|ref|XM_013789623.1|	501	0	PREDICTED: Brassica napus RNA-binding protein cabeza-like (LOC106349632), mRNA	.	.
BraA01g036520.3C	0.38621	0	0.131405	0.118796	0	0.484033	0.125377	0	0.145429	0.66361	0.416554	0.261426	0.135903	0	0.126678	0.362202	0	0	2.87242	1.69594	1.35403	0.137298	0.4221	0.146647	0.276083	0.277509	0.133141	0.634254	0.238675	0.126676	1.09841	1.90582	1.1351	0	0	0.13537	BraA01g036520.3C	protein_coding	chrA01:24879418-24880187:+	gi|685265568|ref|XP_009115323.1|	688	7e-88	PREDICTED: late embryogenesis abundant protein 76 [Brassica rapa]	gi|923515040|ref|XM_013789602.1|	681	0	PREDICTED: Brassica napus late embryogenesis abundant protein 76-like (LOC106349612), mRNA	.	.
BraA01g036580.3C	0	0.571852	0.238632	1.07867	1.59482	2.19751	1.13842	1.98982	1.71664	0.602558	1.00862	0.593437	0.616999	1.00313	1.15024	1.97328	1.27374	1.22141	0.47421	0.829182	0.122946	1.87	1.40531	1.59786	0.250684	0.125989	0.362676	0.921444	2.70896	1.61031	0.249338	1.35966	0.343557	1.77732	0.507034	0.860411	BraA01g036580.3C	protein_coding	chrA01:24903012-24904141:-	gi|685265589|ref|XP_009115417.1|	711	6e-92	PREDICTED: pentatricopeptide repeat-containing protein At3g16010-like [Brassica rapa]	gi|685265588|ref|XM_009117169.1|	388	0	PREDICTED: Brassica rapa pentatricopeptide repeat-containing protein At3g16010-like (LOC103840652), mRNA	Q9LW84	116
BraA01g036630.3C	27.9132	54.6217	27.0518	47.6102	46.5155	50.7701	47.4996	48.995	56.4624	54.7496	50.8656	53.8186	44.2537	40.8603	45.1171	71.0209	67.942	64.4926	71.7447	64.8437	65.8183	64.9127	74.0101	69.7917	53.1622	58.107	60.1334	116.868	119.288	116.708	45.3538	43.4751	44.0306	121.233	121.623	121.538	BraA01g036630.3C	protein_coding	chrA01:24943856-24944847:+	gi|685265600|ref|XP_009115469.1|	1262	7e-173	PREDICTED: uncharacterized protein LOC103840703 [Brassica rapa]	gi|685265599|ref|XM_009117221.1|	870	0	PREDICTED: Brassica rapa uncharacterized LOC103840703 (LOC103840703), mRNA	Q74LY0	52
BraA01g036660.3C	3.30829	20.3205	1.59463	1.61122	1.88068	2.1595	1.78997	1.27101	0.93431	0.757934	0.297351	0.0933077	0.776099	0.887203	0.723421	0.775659	0.625855	2.16052	31.9682	67.981	62.4393	44.1038	41.9826	47.9442	32.3208	36.3506	35.0701	12.1338	10.4781	10.1277	14.2115	13.8959	15.4853	79.382	81.9147	57.7859	BraA01g036660.3C	protein_coding	chrA01:24975504-24976628:-	gi|685265606|ref|XP_009115498.1|	1652	0	PREDICTED: NAC domain-containing protein 55-like [Brassica rapa]	gi|685265605|ref|XM_009117250.1|	954	0	PREDICTED: Brassica rapa NAC domain-containing protein 55-like (LOC103840729), mRNA	Q9LDY8	518
BraA01g036680.3C	1.08906	4.17345	0.926367	14.1533	14.4458	12.6255	13.5232	11.297	10.1497	9.35648	7.04778	7.37189	14.9459	12.3639	13.217	31.79	35.107	19.0846	4.78628	2.94297	2.67273	6.87216	7.53837	7.54684	12.1644	6.74941	8.25971	5.5444	6.47795	5.98329	6.96908	5.37416	9.69144	9.48686	4.72392	9.63859	BraA01g036680.3C	protein_coding	chrA01:25001135-25002647:+	gi|923514989|ref|XP_013644931.1|	1388	0	PREDICTED: ribosome biogenesis protein BRX1-like [Brassica napus]	gi|685265611|ref|XM_009117272.1|	944	0	PREDICTED: Brassica rapa ribosome biogenesis protein BRX1-like (LOC103840749), mRNA	Q9C928	496
BraA01g036700.3C	2.43256	1.39631	2.48299	1.04754	0.885025	0.884127	1.5478	1.48381	1.46558	1.67191	1.81909	2.00886	3.21853	2.92255	3.0639	0.501897	0.530136	0.423631	2.69736	2.5308	2.45618	1.69497	1.48883	1.36702	2.85184	3.21615	3.92463	3.86705	4.41973	3.31917	2.21388	1.78344	2.00186	5.67125	5.97918	3.99033	BraA01g036700.3C	protein_coding	chrA01:25009033-25013026:-	gi|685265724|ref|XP_009116224.1|	2667	0	PREDICTED: ultraviolet-B receptor UVR8-like, partial [Brassica rapa]	gi|685265723|ref|XM_009117976.1|	1512	0	PREDICTED: Brassica rapa ultraviolet-B receptor UVR8-like (LOC103841435), partial mRNA	Q9FN03	158
BraA01g036710.3C	1.83794	6.47379	3.0642	2.37443	2.85585	2.13071	4.83292	3.45454	4.77536	3.66335	4.229	2.92364	2.78102	2.36588	3.31568	13.4448	13.2681	8.16195	1.24269	0.869163	0.579932	1.1761	1.07133	1.60512	0.525542	0.132064	0.253443	1.75065	1.363	1.62767	0.914763	1.42522	1.56053	0.291097	0.797224	1.09516	BraA01g036710.3C	protein_coding	chrA01:25014137-25016869:+	gi|685265621|ref|XP_009115562.1|	2297	0	PREDICTED: uncharacterized protein LOC103840780 isoform X2 [Brassica rapa]	gi|685265620|ref|XM_009117314.1|	1431	0	PREDICTED: Brassica rapa uncharacterized LOC103840780 (LOC103840780), transcript variant X3, mRNA	Q9LUQ3	611
BraA01g036770.3C	467.149	497.119	467.896	273.464	295.909	279.449	117.746	131.435	126.209	13.9219	11.7202	12.8542	22.9425	25.5762	29.5865	36.806	31.7573	93.287	113.203	203.554	227.915	157.296	148.971	154.667	141.519	119.508	113.473	3.53442	6.16118	4.9829	43.0941	42.5034	45.5802	22.4571	22.1942	22.187	BraA01g036770.3C	protein_coding	chrA01:25044377-25045207:+	gi|923514968|ref|XP_013644867.1|	1361	0	PREDICTED: lectin-like protein LEC [Brassica napus]	gi|685265633|ref|XM_009117375.1|	831	0	PREDICTED: Brassica rapa lectin-like protein LEC (LOC103840846), mRNA	Q9LK72	442
BraA01g036960.3C	2.71233	1.2841	1.60755	1.61477	0.99477	1.23363	8.00984	2.0479	1.68027	3.33752	3.30292	2.39862	4.24879	5.63135	2.84116	6.0311	4.52865	3.7712	0.443684	0.265991	0.644176	0.653194	1.05188	0.797336	0.75055	1.32024	0.904881	1.29319	1.37881	2.75502	0.466576	0.277558	0.257153	9.39545	2.7515	1.56405	BraA01g036960.3C	protein_coding	chrA01:25143360-25144591:-	gi|685265762|ref|XP_009116545.1|	1055	4e-140	PREDICTED: uncharacterized protein At3g15000, mitochondrial-like [Brassica rapa]	gi|685265761|ref|XM_009118297.1|	1002	0	PREDICTED: Brassica rapa uncharacterized protein At3g15000, mitochondrial-like (LOC103841737), mRNA	Q9LKA5	291
BraA01g037030.3C	6.29168	5.42692	5.15459	5.72947	4.70614	5.36927	1.28999	1.23307	1.40279	5.03554	4.46448	4.20281	2.35963	2.48651	2.36239	0.465835	0.225521	0.648767	5.5414	14.8488	12.5384	4.14967	3.07627	3.5835	5.94752	6.33514	6.84941	7.4231	6.59974	6.10952	14.1268	13.0434	12.1656	4.48421	2.96249	3.74319	BraA01g037030.3C	protein_coding	chrA01:25169716-25171766:-	gi|685265770|ref|XP_009116583.1|	1740	0	PREDICTED: protein trichome birefringence-like 41 [Brassica rapa]	gi|685265769|ref|XM_009118335.1|	1059	0	PREDICTED: Brassica rapa protein trichome birefringence-like 41 (LOC103841769), mRNA	F4IWA8	572
BraA01g037060.3C	1.93648	0.904284	1.97662	3.8988	3.75286	3.93004	1.80021	1.54518	1.88926	8.12182	8.63931	7.50733	7.20141	6.27901	7.70868	4.89109	4.31614	5.17352	4.46357	2.72053	2.54594	3.94277	2.74174	3.40909	4.20008	3.22562	3.23168	5.1172	4.77332	6.27944	2.11224	2.32692	2.88885	2.3421	1.90901	3.05439	BraA01g037060.3C	protein_coding	chrA01:25201438-25203429:-	gi|923514913|ref|XP_013644676.1|	3488	0	PREDICTED: trifunctional UDP-glucose 4,6-dehydratase/UDP-4-keto-6-deoxy-D-glucose 3,5-epimerase/UDP-4-keto-L-rhamnose-reductase RHM3 [Brassica napus]	gi|923514912|ref|XM_013789222.1|	1818	0	PREDICTED: Brassica napus trifunctional UDP-glucose 4,6-dehydratase/UDP-4-keto-6-deoxy-D-glucose 3,5-epimerase/UDP-4-keto-L-rhamnose-reductase RHM3 (LOC106349276), mRNA	Q9LH76	1221
BraA01g037120.3C	11.6209	11.3702	10.4082	9.88253	7.57771	11.5659	4.27185	6.18182	4.18284	5.16813	5.59113	4.91639	9.68195	9.77711	7.95975	8.89513	8.69024	35.4162	84.5235	114.645	103.713	75.3347	60.2668	62.749	98.8929	152.759	150.114	33.3978	33.9544	31.39	96.2966	93.9091	91.6933	151.845	154.433	120.879	BraA01g037120.3C	protein_coding	chrA01:25226748-25229013:-	gi|685265790|ref|XP_009116688.1|	2671	0	PREDICTED: cytochrome P450 72A15-like [Brassica rapa]	gi|685265789|ref|XM_009118440.1|	1539	0	PREDICTED: Brassica rapa cytochrome P450 72A15-like (LOC103841861), mRNA	Q9LUC5	871
BraA01g037140.3C	26.6396	42.7484	28.7156	52.6619	48.8915	52.941	92.4267	81.3005	80.2283	48.9504	47.0621	52.1735	28.9711	27.0367	29.6599	98.1307	92.121	53.9167	20.4381	10.7633	11.9564	11.2665	16.5028	17.6581	11.3891	8.53953	10.6879	18.3293	18.3613	17.9651	13.8385	13.2348	15.4117	6.05607	6.66167	6.88233	BraA01g037140.3C	protein_coding	chrA01:25235773-25237594:-	gi|685265799|ref|XP_009116734.1|	2524	0	PREDICTED: cytochrome P450 72A13-like isoform X2 [Brassica rapa]	gi|685265798|ref|XM_009118486.1|	1521	0	PREDICTED: Brassica rapa cytochrome P450 72A13-like (LOC103841893), transcript variant X2, mRNA	Q9LUC8	715
BraA01g037160.3C	5.09935	3.07035	4.0039	3.25772	1.11494	2.02791	4.58424	6.46858	4.65274	2.02201	2.32692	2.78796	3.72684	3.78699	3.85986	1.37953	1.33572	3.07402	2.18805	5.76373	5.77596	4.18345	4.71581	6.0322	6.51945	2.95947	5.47665	0.386512	0.363619	1.15794	5.22941	6.42916	7.30155	1.11828	3.40291	3.50599	BraA01g037160.3C	protein_coding	chrA01:25244106-25244552:-	gi|685265805|ref|XP_009116765.1|	655	2e-85	PREDICTED: uncharacterized protein LOC103841923 [Brassica rapa]	gi|685265804|ref|XM_009118517.1|	447	0	PREDICTED: Brassica rapa uncharacterized LOC103841923 (LOC103841923), mRNA	.	.
BraA01g037220.3C	0.0966056	0	0.147913	0.222865	0	0.272419	0.0470421	0.0513899	0	0.597578	0.468881	0.490444	0.203966	0.0518146	0.0950611	0	0	0	0.538875	0.293689	0.304824	0.412122	0.105583	0.275114	0.984088	1.19742	1.19893	1.33267	1.8806	2.09131	0.721227	0.715075	1.32501	0.0459018	0.104759	0.101583	BraA01g037220.3C	protein_coding	chrA01:25285794-25288127:+	gi|685265817|ref|XP_009116826.1|	3152	0	PREDICTED: terpenoid synthase 25-like [Brassica rapa]	gi|685265816|ref|XM_009118578.1|	1782	0	PREDICTED: Brassica rapa terpenoid synthase 25-like (LOC103841981), mRNA	Q9LIA1	848
BraA01g037290.3C	0.0794109	0.233092	0.324229	0.293116	0.0902862	0.223931	0.696045	0.337944	0.269122	0.0818692	0.342601	0.32252	0.0838313	0.170369	0.312565	0.67027	0.540821	0.518602	0.161077	0.563303	0.334091	0.508153	0.694324	0.271376	0.0851507	0.171181	0.328511	0.782476	1.17781	0.859539	0.254081	0	0.233395	0.528245	1.46392	0.417513	BraA01g037290.3C	protein_coding	chrA01:25350843-25352855:-	gi|685265829|ref|XP_009116903.1|	1830	0	PREDICTED: peroxisomal (S)-2-hydroxy-acid oxidase GLO1 isoform X1 [Brassica rapa]	gi|685265828|ref|XM_009118655.1|	1104	0	PREDICTED: Brassica rapa peroxisomal (S)-2-hydroxy-acid oxidase GLO1 (LOC103842047), transcript variant X1, mRNA	Q9LRR9	694
BraA01g037360.3C	0.542083	1.20542	0.754528	0.954976	0.392205	0.463219	0.959882	0.943737	0.66804	1.11773	1.1162	1.15085	0.728329	0.264316	0.484924	0.762579	1.00686	0.83676	1.44942	0.699142	0.51832	1.52417	2.53141	2.07704	0.528422	0.584266	0.560629	1.35963	1.27911	1.55173	1.20885	1.14643	1.20699	5.15138	1.54975	1.91732	BraA01g037360.3C	protein_coding	chrA01:25419112-25427462:+	gi|685265848|ref|XP_009117000.1|	2833	0	PREDICTED: pectinesterase/pectinesterase inhibitor 3-like [Brassica rapa]	gi|685265847|ref|XM_009118752.1|	1767	0	PREDICTED: Brassica rapa pectinesterase/pectinesterase inhibitor 3-like (LOC103842134), mRNA	O49006	982
BraA01g037380.3C	39.7933	32.2427	41.8876	89.6977	86.2445	88.446	39.764	37.9265	35.8218	27.1365	30.178	29.0405	38.2889	34.2381	30.5915	8.16367	10.4451	20.3027	40.7787	46.6257	44.4697	70.7329	63.4248	62.0918	46.0031	30.3803	34.7243	25.7318	21.3259	17.5388	90.1862	96.6492	89.7472	17.7259	20.2274	21.1398	BraA01g037380.3C	protein_coding	chrA01:25447507-25448100:+	gi|685265858|ref|XP_009117044.1|	636	9e-83	PREDICTED: uncharacterized protein LOC103842171 [Brassica rapa]	gi|685265857|ref|XM_009118796.1|	423	0	PREDICTED: Brassica rapa uncharacterized LOC103842171 (LOC103842171), mRNA	.	.
BraA01g037400.3C	26.0072	11.2181	31.2563	29.4182	24.9587	26.1546	30.5031	33.1735	29.3794	40.651	39.9646	43.585	36.0162	38.9973	33.8468	4.13066	6.66581	4.20043	9.92664	15.7278	20.589	33.2544	27.3544	28.0327	62.371	53.9522	58.7107	19.013	16.0723	14.1714	77.3963	67.1256	72.4648	34.9458	35.0254	32.4933	BraA01g037400.3C	protein_coding	chrA01:25463885-25464599:+	gi|685265860|ref|XP_009117056.1|	1111	3e-152	PREDICTED: protein LURP-one-related 11 [Brassica rapa]	gi|923523648|ref|XM_013820340.1|	627	0	PREDICTED: Brassica napus protein LURP-one-related 11-like (LOC106380560), mRNA	.	.
BraA01g037440.3C	0	0	0	0	0.0794864	0	0	0	0	0	0	0	0	0	0	0	0	0	3.61613	2.26707	3.30894	4.99562	9.32188	9.47695	6.07218	4.37043	4.26593	1.03332	1.49058	1.51345	3.80271	3.69635	3.69858	6.24507	8.18776	5.88114	BraA01g037440.3C	protein_coding	chrA01:25491429-25492777:-	gi|727558561|ref|XP_010451481.1|	1199	5e-155	PREDICTED: uncharacterized protein LOC104733611 [Camelina sativa]	gi|922547381|ref|XM_013746123.1|	208	3e-103	PREDICTED: Brassica oleracea var. oleracea uncharacterized LOC106309039 (LOC106309039), mRNA	.	.
BraA01g037450.3C	63.5344	88.4583	65.251	29.856	25.2156	30.412	87.7956	58.8506	63.3718	6.99397	6.19128	6.62318	63.7657	64.9348	63.2888	23.1243	25.5885	13.291	12.9667	16.6577	12.8983	6.67858	13.5455	14.5638	32.4546	23.7636	24.8261	5.91328	4.83743	7.0605	16.5576	19.0375	18.9161	35.3331	36.6412	40.3318	BraA01g037450.3C	protein_coding	chrA01:25501716-25503052:+	gi|685265871|ref|XP_009117104.1|	972	4e-131	PREDICTED: dnaJ homolog subfamily B member 8-like [Brassica rapa]	gi|685265870|ref|XM_009118856.1|	672	0	PREDICTED: Brassica rapa dnaJ homolog subfamily B member 8-like (LOC103842232), mRNA	Q8NHS0	73.6
BraA01g037460.3C	0.341792	0.501624	0.174439	1.2616	0.971501	1.92764	2.16366	0.727272	0.579163	0.352373	1.47458	0.867598	1.44327	1.83321	0.504491	1.68286	2.32774	1.33927	7.62618	6.23445	5.93158	7.29045	7.28431	6.61882	3.11522	2.76292	3.00463	3.03106	3.00996	3.36322	4.55662	2.89136	2.67881	1.62401	1.11192	0.718807	BraA01g037460.3C	protein_coding	chrA01:25504074-25504756:-	gi|685265873|ref|XP_009117117.1|	847	8e-114	PREDICTED: uncharacterized protein LOC103842241 [Brassica rapa]	gi|685265872|ref|XM_009118869.1|	513	0	PREDICTED: Brassica rapa uncharacterized LOC103842241 (LOC103842241), mRNA	Q9LJG6	216
BraA01g037470.3C	225.484	212.495	216.938	94.077	93.635	103.008	227.361	66.7748	68.6506	4.79307	6.44712	6.40642	25.5914	28.498	27.4489	12.1461	10.8557	27.3256	313.221	622.896	651.751	404.459	335.358	368.825	465.046	397.653	383.626	109.618	113.284	108.813	349.924	354.313	346.485	61.2216	56.5372	64.9499	BraA01g037470.3C	protein_coding	chrA01:25506147-25506658:+	gi|685265875|ref|XP_009117127.1|	328	1e-37	PREDICTED: auxin-repressed 12.5 kDa protein-like [Brassica rapa]	gi|685265874|ref|XM_009118879.1|	264	4e-135	PREDICTED: Brassica rapa auxin-repressed 12.5 kDa protein-like (LOC103842251), mRNA	.	.
BraA01g037480.3C	2.95088	2.79406	1.55461	2.4595	2.81387	3.93691	3.98632	3.54456	2.3657	1.17764	1.6427	1.35311	2.21074	2.45065	2.43536	3.61553	2.0745	3.60555	8.78524	14.4692	12.4147	15.7356	18.6224	18.4335	28.8858	19.4934	19.8862	4.59596	4.50023	6.36929	17.6649	13.6892	15.0143	8.32214	7.84499	10.7101	BraA01g037480.3C	protein_coding	chrA01:25508041-25508961:+	gi|674893715|emb|CDY39101.1|	1494	0	BnaA01g29550D [Brassica napus]	gi|685265876|ref|XM_009118889.1|	913	0	PREDICTED: Brassica rapa uncharacterized LOC103842261 (LOC103842261), mRNA	Q9LJG8	215
BraA01g037520.3C	12.4595	23.273	11.0992	14.424	15.1961	14.2668	42.1392	24.8245	25.0791	36.4337	41.537	46.2329	24.1538	19.6835	20.2852	35.6923	36.4102	19.8243	17.0017	8.03471	6.4332	9.18089	11.6367	12.9026	7.53022	10.0108	9.84005	43.9739	39.2695	41.6843	7.48982	8.38411	9.98712	16.5763	17.4416	15.96	BraA01g037520.3C	protein_coding	chrA01:25528558-25529676:-	gi|685265888|ref|XP_009117176.1|	665	2e-87	PREDICTED: U6 snRNA-associated Sm-like protein LSm1 [Brassica rapa]	gi|685265887|ref|XM_009118928.1|	387	0	PREDICTED: Brassica rapa U6 snRNA-associated Sm-like protein LSm1 (LOC103842307), mRNA	Q8LFL8	254
BraA01g037540.3C	30.9555	16.9124	31.5972	34.9247	37.2072	39.3626	17.3477	12.9412	14.8896	37.621	38.5055	38.9252	32.3209	28.5605	29.4601	14.9924	12.5671	16.8711	40.7142	48.2366	44.5994	26.7889	20.2499	16.2154	35.5754	37.3015	36.0262	31.875	29.7427	30.2007	50.5264	52.7634	48.5525	19.5754	18.7851	21.146	BraA01g037540.3C	protein_coding	chrA01:25536820-25539147:+	gi|685265892|ref|XP_009117189.1|	3652	0	PREDICTED: subtilisin-like protease [Brassica rapa]	gi|685265891|ref|XM_009118941.1|	2328	0	PREDICTED: Brassica rapa subtilisin-like protease (LOC103842325), mRNA	Q9LVJ1	1305
BraA01g037550.3C	1.47344	3.84438	3.75996	6.57172	3.90886	5.53995	3.58746	3.39648	5.8257	10.6334	9.0055	10.2231	2.59243	5.53197	7.24941	12.7821	12.0417	22.4524	5.47932	5.72364	2.84118	7.07143	6.70985	4.75554	12.1129	8.20517	6.60335	6.53334	5.46345	5.55778	18.3337	15.3209	13.954	5.36743	7.72269	6.45567	BraA01g037550.3C	protein_coding	chrA01:25545687-25546043:+	gi|685265894|ref|XP_009117197.1|	613	5e-80	PREDICTED: uncharacterized protein LOC103842334 [Brassica rapa]	gi|685265893|ref|XM_009118949.1|	357	0	PREDICTED: Brassica rapa uncharacterized LOC103842334 (LOC103842334), mRNA	.	.
BraA01g037560.3C	2.55348	5.0893	2.50989	9.5998	8.9246	9.60078	13.2631	13.3822	12.2861	42.1205	39.4756	38.6022	14.0772	18.058	16.0066	28.8701	24.0888	14.4524	9.01613	4.98352	4.67511	9.78372	15.1942	15.621	10.1409	5.09664	8.31378	16.3079	21.3035	20.5662	30.4612	29.2014	26.962	16.6264	11.999	17.8009	BraA01g037560.3C	protein_coding	chrA01:25548135-25549451:-	gi|685265897|ref|XP_009117205.1|	1428	0	PREDICTED: nuclear transcription factor Y subunit A-6 isoform X1 [Brassica rapa]	gi|685265904|ref|XM_009118978.1|	927	0	PREDICTED: Brassica rapa nuclear transcription factor Y subunit A-6 (LOC103842343), transcript variant X5, mRNA	Q9LVJ7	309
BraA01g037600.3C	0.16699	0.653545	0.170452	2.61962	2.27831	2.74689	1.87026	1.24364	1.69777	3.35711	4.14253	6.1887	4.1427	4.92609	4.43664	5.40302	6.14125	6.21611	4.91146	0.592273	0.702546	4.89762	7.66534	6.37242	8.68439	3.50969	4.23122	11.3535	12.3838	13.1454	9.79544	11.6543	9.65232	8.64856	11.0461	14.3109	BraA01g037600.3C	protein_coding	chrA01:25579353-25580402:+	gi|685265930|ref|XP_009117302.1|	1304	3e-177	PREDICTED: uncharacterized protein LOC103842430 [Brassica rapa]	gi|685265929|ref|XM_009119054.1|	1050	0	PREDICTED: Brassica rapa uncharacterized LOC103842430 (LOC103842430), mRNA	Q9LVK2	296
BraA01g037770.3C	4.11755	6.26687	6.0125	9.65735	9.81805	9.89095	4.17718	4.13734	3.55318	10.9074	12.3363	9.58093	15.3948	14.539	14.9126	20.8365	21.3433	29.8033	4.93002	1.3329	1.80448	3.47652	4.75021	5.14641	1.77833	1.35605	1.41948	6.25491	6.46758	7.7094	5.00141	5.62394	5.93885	4.07592	3.41082	2.34526	BraA01g037770.3C	protein_coding	chrA01:25689225-25691637:-	gi|685265956|ref|XP_009117428.1|	1875	0	PREDICTED: zinc finger protein NUTCRACKER-like isoform X1 [Brassica rapa]	gi|685265959|ref|XM_009119193.1|	1533	0	PREDICTED: Brassica rapa zinc finger protein NUTCRACKER-like (LOC103842544), transcript variant X3, mRNA	Q9LRW7	562
BraA01g037790.3C	100.921	60.8332	107.23	68.9976	66.1642	66.7305	37.3421	37.5235	36.8258	42.231	38.8013	43.5869	181.004	175.062	171.495	43.9451	48.8633	53.3051	119.472	182.022	182.617	185.388	162.778	166.731	273.753	291.513	305.878	67.9167	70.7133	72.087	157.717	157.118	160.277	49.4125	52.2333	48.3717	BraA01g037790.3C	protein_coding	chrA01:25703337-25706254:+	gi|685265963|ref|XP_009117459.1|	3094	0	PREDICTED: beta-fructofuranosidase, insoluble isoenzyme CWINV1 [Brassica rapa]	gi|685265962|ref|XM_009119211.1|	1717	0	PREDICTED: Brassica rapa beta-fructofuranosidase, insoluble isoenzyme CWINV1 (LOC103842569), mRNA	Q43866	1108
BraA01g037820.3C	2.37105	1.62392	1.51263	3.17255	2.83056	3.06448	0.981397	1.51355	0.937469	2.1389	1.79014	2.04633	0.750911	1.20813	1.10824	2.33484	3.55252	2.16782	1.92377	3.00341	3.5537	5.5	6.67283	6.54972	5.72047	5.87778	4.72043	1.57701	2.41774	2.15812	5.68977	6.76948	5.2846	5.8583	7.45639	6.48238	BraA01g037820.3C	protein_coding	chrA01:25725925-25728805:+	gi|685265969|ref|XP_009117496.1|	2417	0	PREDICTED: 3-epi-6-deoxocathasterone 23-monooxygenase [Brassica rapa]	gi|685265968|ref|XM_009119248.1|	1479	0	PREDICTED: Brassica rapa 3-epi-6-deoxocathasterone 23-monooxygenase (LOC103842602), mRNA	Q94IA6	855
BraA01g037840.3C	44.6038	93.5757	38.9633	15.2252	17.328	15.2459	30.5031	40.9091	35.0657	44.9756	54.8948	49.9736	26.5693	30.8979	23.8028	34.6189	32.7577	33.7861	42.4009	45.0581	49.7076	30.4211	27.2015	31.3775	38.9819	52.5959	54.0833	100.852	105.896	105.391	49.808	45.3911	47.3966	105.635	114.022	101.597	BraA01g037840.3C	protein_coding	chrA01:25731947-25732573:+	gi|685265971|ref|XP_009117509.1|	1034	5e-141	PREDICTED: PRA1 family protein F3-like [Brassica rapa]	gi|685265970|ref|XM_009119261.1|	627	0	PREDICTED: Brassica rapa PRA1 family protein F3-like (LOC103842610), mRNA	Q9LIC6	167
BraA01g037850.3C	9.51453	15.1607	8.0469	2.50853	1.39083	3.70511	5.03023	5.49513	5.98828	5.04467	5.86405	3.58822	10.1877	14.7262	11.3686	5.73627	4.44328	9.58666	14.7501	20.2475	23.8743	15.9457	10.2502	12.6962	22.7364	29.5928	33.3156	23.5718	24.4437	27.953	22.0346	22.9964	23.9691	58.3829	71.9281	50.4527	BraA01g037850.3C	protein_coding	chrA01:25734317-25734961:+	gi|685265975|ref|XP_009117530.1|	1088	6e-149	PREDICTED: PRA1 family protein F3-like [Brassica rapa]	gi|685265974|ref|XM_009119282.1|	645	0	PREDICTED: Brassica rapa PRA1 family protein F3-like (LOC103842630), mRNA	Q9LIC6	164
BraA01g037930.3C	0.186135	0.637414	0.142495	0.515287	0.264533	0.393663	0.725108	0.990156	0.841077	1.871	1.90722	1.60644	5.3054	3.89352	4.80793	21.406	21.6135	15.1947	0.613528	0.424399	0.783093	0.694799	0.762872	1.06015	0.748458	1.70527	1.54003	2.1092	2.07054	2.28945	1.78666	0.63968	1.13972	2.47636	3.3809	3.91452	BraA01g037930.3C	protein_coding	chrA01:25779005-25781454:+	gi|685265991|ref|XP_009117623.1|	3183	0	PREDICTED: ABC transporter E family member 1 [Brassica rapa]	gi|685265990|ref|XM_009119375.1|	1015	0	PREDICTED: Brassica rapa ABC transporter E family member 1 (LOC103842711), mRNA	Q9LID6	1090
BraA01g037950.3C	0.161454	0	0	0.148987	0	0	0	0	0.0911942	0.832262	0.17414	0.655731	4.68714	6.14833	5.00449	0	0.219914	0	0.0818732	0	0.0849071	0.0860958	0.088229	0.183916	0.692496	0.957099	0.667912	6.52265	7.70782	7.38746	3.18561	1.96335	1.66084	0	0	0	BraA01g037950.3C	protein_coding	chrA01:25793240-25796033:-	gi|685265993|ref|XP_009117633.1|	1910	0	PREDICTED: feruloyl CoA ortho-hydroxylase 1-like [Brassica rapa]	gi|685265992|ref|XM_009119385.1|	1083	0	PREDICTED: Brassica rapa feruloyl CoA ortho-hydroxylase 1-like (LOC103842722), mRNA	Q9LHN8	664
BraA01g038110.3C	69.5158	149.786	65.7594	107.969	103.829	97.7019	97.8869	105.05	97.7864	54.2074	59.0986	55.9719	64.9718	63.8831	66.9884	144.975	156.504	150.363	110.582	116.996	102.571	112.507	130.901	130.003	56.6174	46.4107	46.9373	55.0816	56.0263	49.4507	61.7443	58.1743	57.9102	63.0098	68.5409	74.3781	BraA01g038110.3C	protein_coding	chrA01:25906978-25908875:-	gi|922406084|ref|XP_013594717.1|	729	5e-93	PREDICTED: serine/arginine-rich SC35-like splicing factor SCL30A [Brassica oleracea var. oleracea]	gi|685385597|ref|XM_009126499.1|	792	0	PREDICTED: Brassica rapa serine/arginine-rich SC35-like splicing factor SCL30A (LOC103849767), mRNA	Q9LHP2	249
BraA01g038240.3C	28.2955	34.363	29.8628	19.4454	18.9859	19.0601	24.3624	23.512	26.5371	31.6992	33.4133	31.1184	20.042	17.842	19.2033	24.6566	22.4746	20.253	18.4146	18.0636	16.1349	11.979	11.4792	11.4737	10.6938	12.9632	11.3079	24.0939	25.8918	26.8645	9.96505	8.33849	8.66683	26.3537	20.7671	17.4201	BraA01g038240.3C	protein_coding	chrA01:25980978-25984868:+	gi|685385549|ref|XP_009124729.1|	3856	0	PREDICTED: formin-binding protein 4 isoform X1 [Brassica rapa]	gi|685385548|ref|XM_009126481.1|	2646	0	PREDICTED: Brassica rapa formin-binding protein 4 (LOC103849755), transcript variant X1, mRNA	.	.
BraA01g038290.3C	0.334617	0.81849	0.341554	0.669021	0.634071	0.419373	0.760395	0.415336	0.630006	0.574959	0.360907	0.283128	0.176622	0.538417	0.329267	0.862994	0.759626	0.291367	1.18779	0.734689	1.52509	1.01113	0.609521	0.952923	0.837206	0.540983	0.288388	1.26391	1.29244	1.70118	0.535316	0.707667	0.655643	0.847958	1.33048	1.87658	BraA01g038290.3C	protein_coding	chrA01:25998895-26002038:+	gi|685385541|ref|XP_009124726.1|	2669	0	PREDICTED: putative ribosomal RNA methyltransferase NOP2 [Brassica rapa]	gi|685385540|ref|XM_009126478.1|	1572	0	PREDICTED: Brassica rapa putative ribosomal RNA methyltransferase NOP2 (LOC103849752), mRNA	P94464	194
BraA01g038300.3C	0.273114	2.13776	0.557552	2.0162	3.41569	3.33734	3.19183	1.16228	1.54263	0.844707	1.47286	0.831921	4.61307	2.92971	5.1062	8.45251	6.69607	6.06425	7.47878	9.13318	8.61768	18.933	17.9097	20.5333	5.85709	6.47607	5.08425	6.72783	5.31665	6.98732	14.8554	13.2847	14.4487	6.22892	5.0348	12.0618	BraA01g038300.3C	protein_coding	chrA01:26007045-26007365:+	gi|685385532|ref|XP_009124722.1|	378	2e-44	PREDICTED: uncharacterized protein LOC103849748 [Brassica rapa]	gi|685385531|ref|XM_009126474.1|	321	9e-167	PREDICTED: Brassica rapa uncharacterized LOC103849748 (LOC103849748), mRNA	.	.
BraA01g038350.3C	1.49098	4.66818	3.50034	2.88929	1.18662	1.96206	2.61372	3.17254	2.69488	1.69085	1.2865	1.05971	1.57398	0.479814	1.46714	3.14617	5.07709	2.33688	8.01439	7.5545	8.15455	5.72449	7.82177	6.11427	4.63637	4.82101	4.78017	5.72964	3.59352	6.01518	5.72461	5.20279	5.84281	21.253	23.9289	18.3433	BraA01g038350.3C	protein_coding	chrA01:26020122-26021067:+	gi|923747672|ref|XP_013673218.1|	690	3e-89	PREDICTED: 30S ribosomal protein S10, chloroplastic [Brassica napus]	gi|923747671|ref|XM_013817764.1|	585	0	PREDICTED: Brassica napus 30S ribosomal protein S10, chloroplastic (LOC106377514), transcript variant X2, mRNA	Q9LK61	236
BraA01g038370.3C	0.0197721	0.0193455	0.040364	0.0182454	0	0.0371704	0.0385122	0.0210358	0.111679	0	0.0213256	0.0401513	0	0.0212096	0	0.0556291	0	0.129124	0.160423	0.16029	0.145572	0.0421741	0.0864382	0.0450457	0.0212012	0.170486	0.0817944	0.506545	0.458214	0.603126	0.126525	0.125446	0.0581118	0.056368	0.214409	0.0207909	BraA01g038370.3C	protein_coding	chrA01:26027847-26032846:+	gi|685385500|ref|XP_009124708.1|	7375	0	PREDICTED: ABC transporter C family member 3 [Brassica rapa]	gi|685385499|ref|XM_009126460.1|	4419	0	PREDICTED: Brassica rapa ABC transporter C family member 3 (LOC103849739), mRNA	Q9LK64	2385
BraA01g038380.3C	0	0.0418632	0.0436735	0	0	0.040218	0.0833397	0.0455211	0	0.0441111	0	0	0.0451683	0	0.0421025	0.180571	0.0582788	0.111769	0.347152	0.260149	0.765034	0.0912641	0.140288	0.292434	0.367033	0.23058	0.265502	1.05399	0.951905	0.884137	0.273798	0.226218	0.209588	0.650556	0.788761	0.76485	BraA01g038380.3C	protein_coding	chrA01:26033179-26036329:-	gi|685385502|ref|XP_009124710.1|	3488	0	PREDICTED: protein STRUBBELIG-RECEPTOR FAMILY 4-like isoform X1 [Brassica rapa]	gi|685385504|ref|XM_009126463.1|	2049	0	PREDICTED: Brassica rapa protein STRUBBELIG-RECEPTOR FAMILY 4-like (LOC103849740), transcript variant X2, mRNA	Q6R2K2	1133
BraA01g038420.3C	0.199249	1.29966	0.474553	2.45152	2.11434	3.05904	1.55239	1.05992	0.825307	1.09556	1.07452	0.876668	1.68272	2.2086	1.4378	4.01756	4.07091	3.64342	6.33178	6.05734	4.95973	7.22501	7.62178	7.86826	3.06233	2.57705	2.12935	2.48685	3.07837	3.52908	4.81676	6.03983	5.07527	2.58772	3.31301	4.39983	BraA01g038420.3C	protein_coding	chrA01:26050762-26052600:+	gi|685385484|ref|XP_009124702.1|	2075	0	PREDICTED: uncharacterized protein LOC103849734 [Brassica rapa]	gi|685385486|ref|XM_009126455.1|	1320	0	PREDICTED: Brassica rapa uncharacterized LOC103849734 (LOC103849734), transcript variant X2, mRNA	Q949U2	582
BraA01g038440.3C	1.51001	1.39052	1.54132	2.70487	3.13065	2.50476	5.27687	3.21304	2.70922	8.79111	8.43068	10.0109	7.97035	6.19334	7.95378	3.24881	3.14564	1.16016	19.7287	18.9023	17.8439	12.2204	8.93124	11.8383	18.8584	23.3597	24.5275	37.8975	39.1935	42.3029	12.1259	11.365	11.6607	25.998	26.4883	18.6802	BraA01g038440.3C	protein_coding	chrA01:26061621-26062607:-	gi|685385478|ref|XP_009124700.1|	1524	0	PREDICTED: LOW QUALITY PROTEIN: uncharacterized protein At4g19900-like [Brassica rapa]	gi|685385477|ref|XM_009126452.1|	983	0	PREDICTED: Brassica rapa uncharacterized protein At4g19900-like (LOC103849732), mRNA	.	.
BraA01g038460.3C	0.908855	2.73613	0.713613	1.4193	0.953837	2.03717	5.9236	6.02479	5.60735	1.87398	1.73431	1.70365	1.25466	0.899938	0.894325	7.37618	4.47562	5.29619	11.5574	7.93475	11.0298	5.51755	5.57785	6.68961	6.97176	9.19298	9.90563	8.4732	9.59154	8.25516	8.27648	7.91018	7.87661	41.3902	42.1518	42.7118	BraA01g038460.3C	protein_coding	chrA01:26070138-26072785:+	gi|685385469|ref|XP_009124696.1|	1212	4e-162	PREDICTED: golgin subfamily A member 6-like protein 22 isoform X2 [Brassica rapa]	gi|685385468|ref|XM_009126448.1|	1079	0	PREDICTED: Brassica rapa golgin subfamily A member 6-like protein 22 (LOC103849729), transcript variant X2, mRNA	.	.
BraA01g038610.3C	0.218084	1.28027	0.890419	1.20746	0.743851	0.409984	1.27435	0.464043	1.47816	4.4967	2.35218	2.43575	0	0.233939	0.429194	0.30679	0.594096	0	13.9343	5.52493	5.27565	8.14055	18.1146	18.6318	5.37847	3.0557	3.38317	10.3147	8.49078	6.2232	8.6059	9.68553	6.40965	4.35211	4.02033	9.17283	BraA01g038610.3C	protein_coding	chrA01:26160515-26160916:+	gi|685385427|ref|XP_009124678.1|	637	4e-83	PREDICTED: auxin-induced protein 15A-like [Brassica rapa]	gi|923738359|ref|XM_013814978.1|	402	0	PREDICTED: Brassica napus auxin-responsive protein SAUR72 (LOC106375083), mRNA	Q9LTV3	213
BraA01g038640.3C	0.806952	0.507561	1.11785	0.691454	0.524265	0.650151	0.561351	0.36794	0.455791	3.03061	3.04624	2.04835	0.730176	1.2366	1.30451	3.81098	4.8676	1.65625	5.49504	4.08867	3.39495	2.52038	1.95287	1.90409	2.65764	1.80162	1.66912	3.23732	2.77842	2.77913	2.45896	3.71793	2.5411	1.58846	1.06257	1.81828	BraA01g038640.3C	protein_coding	chrA01:26175263-26177432:+	gi|685385409|ref|XP_009124670.1|	2179	0	PREDICTED: phosphoglycerate kinase 1, chloroplastic-like [Brassica rapa]	gi|685385408|ref|XM_009126422.1|	757	0	PREDICTED: Brassica rapa phosphoglycerate kinase 1, chloroplastic-like (LOC103849710), mRNA	Q9LD57	797
BraA01g038660.3C	26.9848	36.0145	25.8941	61.1628	61.785	61.016	56.921	56.3605	67.0079	23.5895	17.9727	22.0961	27.9618	38.2844	36.465	31.4884	34.2149	30.6977	50.1956	49.5241	57.2874	81.4313	88.2057	98.0249	58.2706	52.272	54.9159	16.0517	21.5564	18.9664	79.974	83.7626	81.6252	67.4767	61.4914	56.0967	BraA01g038660.3C	protein_coding	chrA01:26181030-26182282:+	gi|685385406|ref|XP_009124669.1|	1213	2e-167	PREDICTED: myb family transcription factor APL-like [Brassica rapa]	gi|685385405|ref|XM_009126421.1|	705	0	PREDICTED: Brassica rapa myb family transcription factor APL-like (LOC103849708), mRNA	Q8VYI2	395
BraA01g038670.3C	0.792493	1.26001	0.505577	1.27978	1.46417	2.14164	2.50838	3.26718	4.02862	1.73618	0.961604	1.91107	1.35949	1.27517	0.779823	0.97549	0.539721	0.905708	3.41592	2.30886	3.22992	2.3243	3.46456	3.3853	1.69955	1.49478	0.819607	0.585663	1.37744	2.53438	6.44476	8.58955	7.66695	2.2593	1.39649	1.66666	BraA01g038670.3C	protein_coding	chrA01:26184857-26186191:+	gi|685385404|ref|XP_009124668.1|	1577	0	PREDICTED: transcription factor MYB86-like [Brassica rapa]	gi|685385403|ref|XM_009126420.1|	885	0	PREDICTED: Brassica rapa transcription factor MYB86-like (LOC103849707), mRNA	Q8LPH6	213
BraA01g038780.3C	4.06312	2.90513	3.42954	7.57086	6.39632	5.43502	2.89171	2.49392	5.73743	23.6029	25.4514	27.7678	8.4961	9.05232	6.45856	2.19839	1.91572	2.85758	10.5398	7.36382	6.16371	5.33334	3.24513	3.5603	6.28385	3.78978	5.97996	16.9383	19.5567	18.4527	5.91679	5.20532	4.59301	0.445518	0.593122	0.575141	BraA01g038780.3C	protein_coding	chrA01:26254442-26255563:+	gi|685266553|ref|XP_009120492.1|	1849	0	PREDICTED: DNA-damage-repair/toleration protein DRT100 [Brassica rapa]	gi|685266552|ref|XM_009122244.1|	1122	0	PREDICTED: Brassica rapa DNA-damage-repair/toleration protein DRT100 (LOC103845393), mRNA	Q00874	624
BraA01g038810.3C	22.4	41.1979	23.5058	88.6877	81.6598	79.5796	150.828	160.899	158.114	36.7458	37.3293	33.6828	398.301	403.622	383.987	18.3763	19.1379	37.5828	19.8043	18.3777	16.1472	25.5653	34.8335	35.8967	206.063	196.58	204.272	50.3804	51.9322	49.251	99.1513	101.059	108.714	266.7	269.435	207.22	BraA01g038810.3C	protein_coding	chrA01:26269513-26272150:+	gi|685266568|ref|XP_009120551.1|	3226	0	PREDICTED: probable mediator of RNA polymerase II transcription subunit 37c [Brassica rapa]	gi|685266567|ref|XM_009122303.1|	1953	0	PREDICTED: Brassica rapa probable mediator of RNA polymerase II transcription subunit 37c (LOC103845440), mRNA	Q9LHA8	1193
BraA01g038870.3C	115.745	49.7563	116.432	76.908	74.5813	78.4233	16.6808	13.5259	12.9656	26.7601	29.3291	29.5822	24.419	31.1584	26.2366	1.11779	0.96204	3.92069	82.2883	107.182	95.4592	54.8006	27.7897	21.1198	66.5523	57.6657	56.885	14.876	17.0231	17.7224	39.9243	34.2623	29.6677	11.3264	9.95687	11.8831	BraA01g038870.3C	protein_coding	chrA01:26299380-26300847:+	gi|685266584|ref|XP_009120632.1|	1556	0	PREDICTED: endochitinase CH25-like [Brassica rapa]	gi|685266583|ref|XM_009122384.1|	990	0	PREDICTED: Brassica rapa endochitinase CH25-like (LOC103845514), mRNA	Q09023	498
BraA01g039130.3C	2.95818	7.192	3.2025	177.434	171.528	179.39	53.3416	57.604	81.8219	378.17	393.507	376.905	86.588	84.7161	86.9736	217.908	212.331	78.2116	58.8217	7.26715	6.88269	78.6816	109.925	110.282	67.0924	17.2945	14.1844	48.7574	47.4484	49.5723	99.1426	98.6761	117.066	24.1928	23.1354	35.065	BraA01g039130.3C	protein_coding	chrA01:26392913-26394048:+	gi|685266640|ref|XP_009120892.1|	1637	0	PREDICTED: polygalacturonase inhibitor 1-like [Brassica rapa]	gi|923515878|ref|XM_013791519.1|	978	0	PREDICTED: Brassica napus polygalacturonase inhibitor 1-like (LOC106351771), mRNA	Q9LH52	533
BraA01g039180.3C	0.913225	0.536111	2.42361	2.6124	2.4919	3.09025	1.68984	1.94318	1.44429	1.22395	1.77296	0.741796	3.1814	4.21237	3.14519	4.62487	4.60238	7.39527	1.945	2.86882	4.51441	3.31146	5.28988	4.47318	6.7567	5.90574	4.6279	1.07982	0.931206	1.07833	8.57101	8.98073	8.23105	17.7905	20.2021	16.5168	BraA01g039180.3C	protein_coding	chrA01:26413488-26414516:+	gi|937575321|ref|NP_001303039.1|	948	3e-125	omega-6 fatty acid desaturase, endoplasmic reticulum-like [Brassica napus]	gi|386656005|gb|JN992608.1|	561	0	Brassica napus fatty acid desaturase BnaA.FAD2.b pseudogene, complete sequence	Q39287	353
BraA01g039290.3C	8.72334	11.6646	7.56856	11.4038	12.2322	10.7962	3.39827	4.48575	3.44905	15.4387	17.4062	15.6478	2.6092	2.33939	1.71678	2.86338	1.18819	5.31709	11.6488	17.9744	17.8913	6.35738	5.7204	6.12779	5.14462	6.89492	4.05981	12.8933	14.6904	15.4507	10.5442	7.84067	7.83401	6.07914	4.09916	6.72674	BraA01g039290.3C	protein_coding	chrA01:26479698-26480837:-	gi|685266661|ref|XP_009121027.1|	984	2e-133	PREDICTED: uncharacterized protein LOC103845875 isoform X1 [Brassica rapa]	gi|685266660|ref|XM_009122779.1|	603	0	PREDICTED: Brassica rapa uncharacterized LOC103845875 (LOC103845875), transcript variant X1, mRNA	Q8LGG8	84.3
BraA01g039300.3C	8.27274	3.78431	8.88291	2.77598	3.0538	2.12076	4.08073	4.9151	2.91285	9.41496	9.84977	9.81789	8.27958	5.99297	6.76611	0.151139	0.731699	2.38557	2.3972	3.81058	4.52006	1.48958	1.17422	2.20293	6.33621	6.13733	9.88915	22.8667	21.0144	24.6325	5.04177	6.9301	6.84167	2.75664	3.14566	4.06707	BraA01g039300.3C	protein_coding	chrA01:26485501-26486679:-	gi|685266669|ref|XP_009121059.1|	1466	0	PREDICTED: uncharacterized protein LOC103845901 isoform X1 [Brassica rapa]	gi|685266670|ref|XM_009122817.1|	816	0	PREDICTED: Brassica rapa uncharacterized LOC103845901 (LOC103845901), transcript variant X2, mRNA	.	.
BraA01g039320.3C	27.1358	2.85926	28.9768	16.5653	10.9169	14.1269	2.43947	6.21818	1.88642	27.1151	27.9171	22.4658	20.2728	15.2261	10.27	5.28556	3.41181	4.36218	8.04463	13.1146	10.5382	1.33572	4.10643	3.32888	5.37179	17.9984	15.1115	9.46125	11.2228	10.2698	4.89772	6.62174	7.77093	8.72791	8.14877	6.1458	BraA01g039320.3C	protein_coding	chrA01:26493601-26493898:+	gi|685266675|ref|XP_009121086.1|	371	1e-39	PREDICTED: ubiquitin carboxyl-terminal hydrolase 13 isoform X1 [Brassica rapa]	gi|685266680|ref|XM_009122861.1|	207	1e-103	PREDICTED: Brassica rapa ubiquitin carboxyl-terminal hydrolase 13 (LOC103845922), transcript variant X4, mRNA	Q9FPT1	98.6
BraA01g039410.3C	236.033	197.216	226.242	116.441	120.974	119.032	163.757	163.586	180.806	452.073	484.103	479.314	282.079	288.561	290.509	127.546	134.927	180.471	59.5802	28.8543	34.5193	19.1795	22.6029	15.5348	20.8903	21.4827	30.843	86.533	81.8246	88.9208	24.9338	24.0873	27.602	24.6375	19.5013	22.6922	BraA01g039410.3C	protein_coding	chrA01:26525958-26527331:-	gi|685266698|ref|XP_009121182.1|	1022	2e-139	PREDICTED: protein LURP-one-related 10 [Brassica rapa]	gi|685266697|ref|XM_009122934.1|	585	0	PREDICTED: Brassica rapa protein LURP-one-related 10 (LOC103846007), mRNA	.	.
BraA01g039550.3C	0.992486	0.539483	0.675374	1.11937	0.87765	0.414625	0.214796	0.469297	0.498299	0.22738	0.237881	0.559846	0.349244	0.118294	0	0	0.150205	0.144034	10.1776	12.6277	10.3228	8.46793	5.66463	5.77843	6.85832	6.53717	7.75534	4.45509	3.2712	4.34045	7.64481	7.34638	5.72595	3.77261	2.98959	2.89896	BraA01g039550.3C	protein_coding	chrA01:26640371-26642111:+	gi|685385994|ref|XP_009124885.1|	1430	0	PREDICTED: B3 domain-containing protein At3g11580-like [Brassica rapa]	gi|685385993|ref|XM_009126637.1|	795	0	PREDICTED: Brassica rapa B3 domain-containing protein At3g11580-like (LOC103849927), mRNA	Q8RYD3	410
BraA01g039560.3C	2.9936	0.69738	2.91015	2.76244	4.05187	2.94788	1.38832	1.81995	0.644142	5.87861	5.84259	4.6317	0.60195	1.52916	1.82355	0	0.194168	0	6.50593	5.05599	4.64794	5.47317	7.16678	4.05961	7.64279	4.763	6.78175	8.00645	9.25011	11.923	9.73028	9.94876	9.77601	0.812798	1.54584	1.64887	BraA01g039560.3C	protein_coding	chrA01:26648386-26649187:-	gi|923926267|ref|XP_013732096.1|	746	2e-97	PREDICTED: casparian strip membrane protein 2-like [Brassica napus]	gi|923926266|ref|XM_013876642.1|	612	0	PREDICTED: Brassica napus casparian strip membrane protein 2-like (LOC106435730), mRNA	P0DI46	258
BraA01g039570.3C	0.519194	1.59654	0.227125	1.98486	2.52985	1.88239	2.09481	2.05168	2.42984	2.37047	3.35992	3.91608	5.95075	5.33072	6.05773	8.13851	6.06158	5.13442	8.34982	6.61421	4.83669	9.33419	9.72758	9.63178	3.34033	2.87792	2.76149	7.89308	6.18798	6.27658	6.88212	5.01952	5.81315	2.11451	1.44775	1.48185	BraA01g039570.3C	protein_coding	chrA01:26658540-26660047:+	gi|685376372|ref|XP_009121132.1|	1912	0	PREDICTED: cyclin-B1-3 [Brassica rapa]	gi|685376371|ref|XM_009122884.1|	1179	0	PREDICTED: Brassica rapa cyclin-B1-3 (LOC103845968), mRNA	Q39069	575
BraA01g039610.3C	8.09072	2.95378	7.88867	8.24602	8.23768	8.28607	6.87991	6.93764	5.86582	4.66858	4.49345	3.49441	5.92778	6.93021	6.53545	4.24689	5.59235	6.93984	1.77584	3.67111	3.23875	3.47728	3.36546	3.92037	2.84868	3.57923	3.8091	1.66583	2.12687	1.78237	2.89779	2.93691	3.25338	7.5738	4.97606	3.87287	BraA01g039610.3C	protein_coding	chrA01:26672091-26673662:-	gi|685376382|ref|XP_009121136.1|	2446	0	PREDICTED: transcription factor GAMYB-like isoform X1 [Brassica rapa]	gi|685376383|ref|XM_009122890.1|	1237	0	PREDICTED: Brassica rapa transcription factor GAMYB-like (LOC103845973), transcript variant X2, mRNA	Q9FR97	654
BraA01g039620.3C	4.69658	1.53175	3.72863	3.37084	2.37324	0.981032	18.0419	11.3815	8.84258	3.49699	3.37706	3.17913	6.6107	3.3587	4.108	0.734106	1.42159	1.70398	2.91089	5.55256	6.0375	5.84375	3.70719	8.61942	3.07759	1.1249	1.34924	3.34229	2.17684	2.8242	4.45247	6.06993	5.87932	3.22337	4.81004	4.38985	BraA01g039620.3C	protein_coding	chrA01:26680245-26680580:-	gi|674851034|emb|CDY71660.1|	598	1e-75	BnaC01g44840D, partial [Brassica napus]	gi|923926263|ref|XM_013876641.1|	336	5e-175	PREDICTED: Brassica napus glycerol-3-phosphate acyltransferase 5-like (LOC106435729), mRNA	Q9CAY3	227
BraA01g039710.3C	4.79443	1.34028	3.96167	4.21355	3.24466	5.79422	1.33409	1.21449	1.28954	0.470748	0.61561	0.463623	2.77167	3.06131	2.35889	3.53288	4.19812	10.8842	11.6932	7.51909	8.76467	14.7311	11.6028	11.313	10.1595	6.52092	6.96546	7.6487	6.13749	5.95329	12.2965	13.3987	15.3214	14.9701	12.8739	10.0829	BraA01g039710.3C	protein_coding	chrA01:26741732-26742667:+	gi|685266923|ref|XP_009122287.1|	1369	0	PREDICTED: transcription factor DIVARICATA-like [Brassica rapa]	gi|685266922|ref|XM_009124039.1|	768	0	PREDICTED: Brassica rapa transcription factor DIVARICATA-like (LOC103847011), mRNA	Q8S9H7	230
BraA01g039750.3C	2.54115	2.9982	2.59383	7.65551	7.2229	9.41389	14.1211	13.4383	14.0999	7.47418	8.22241	7.36105	12.7029	12.9881	13.0174	19.9767	20.1567	3.70953	7.95908	6.81644	7.62514	3.82609	4.16594	4.51229	15.4674	15.1445	17.2372	4.86056	4.57267	4.78032	28.2977	30.1111	28.044	12.2162	13.9402	24.3631	BraA01g039750.3C	protein_coding	chrA01:26761924-26764379:-	gi|685266933|ref|XP_009122344.1|	2084	0	PREDICTED: leucoanthocyanidin dioxygenase-like [Brassica rapa]	gi|685266932|ref|XM_009124096.1|	1173	0	PREDICTED: Brassica rapa leucoanthocyanidin dioxygenase-like (LOC103847060), mRNA	Q9SRM3	640
BraA01g039820.3C	2.64231	1.4277	2.29454	2.03797	2.51096	2.33541	2.61176	2.05594	3.20767	3.65926	3.61557	3.96425	2.58124	3.08825	3.3374	3.77257	2.79329	3.34817	0.679957	0.439609	0.954031	0.546784	0.344819	0.404317	0.972625	1.53023	1.38675	1.39895	0.877397	1.08658	1.17771	1.20937	1.54547	1.38666	1.19745	0.829392	BraA01g039820.3C	protein_coding	chrA01:26814034-26817184:-	gi|685266945|ref|XP_009122391.1|	3690	0	PREDICTED: cytosolic endo-beta-N-acetylglucosaminidase [Brassica rapa]	gi|685266944|ref|XM_009124143.1|	1082	0	PREDICTED: Brassica rapa cytosolic endo-beta-N-acetylglucosaminidase (LOC103847098), mRNA	Q9SRL4	1104
BraA01g039830.3C	1.80762	3.34071	1.84509	0.556014	0.342529	0.660764	0.293407	1.2821	1.36133	1.34592	1.84133	2.0393	0.848108	1.18497	0.592907	0.565085	0.683925	0.918157	1.01849	1.01765	1.7956	0.214204	0.658534	0.571972	0.646092	1.08238	0.519296	6.13504	6.88877	3.95264	0.535521	0.424762	0.49192	4.10356	5.11826	4.43511	BraA01g039830.3C	protein_coding	chrA01:26817972-26818844:-	gi|685266952|ref|XP_009122438.1|	1333	0	PREDICTED: dehydration-responsive element-binding protein 2B-like [Brassica rapa]	gi|685266951|ref|XM_009124190.1|	873	0	PREDICTED: Brassica rapa dehydration-responsive element-binding protein 2B-like (LOC103847142), mRNA	O82133	285
BraA01g039880.3C	10.5899	4.38973	8.7878	14.5091	13.5567	14.1714	9.99857	9.41757	9.67995	9.70926	10.1577	9.3571	12.1608	13.2676	10.8581	12.0544	11.5614	16.5769	5.78005	7.78228	8.75753	11.4235	14.4012	13.2142	13.9124	12.8516	12.1226	5.05806	6.59443	4.93179	12.3721	12.5657	12.9487	30.1136	30.5939	24.0562	BraA01g039880.3C	protein_coding	chrA01:26855185-26860554:+	gi|685266967|ref|XP_009122508.1|	2832	0	PREDICTED: adenine/guanine permease AZG1-like [Brassica rapa]	gi|685266966|ref|XM_009124260.1|	1681	0	PREDICTED: Brassica rapa adenine/guanine permease AZG1-like (LOC103847198), mRNA	Q9SRK7	1033
BraA01g039930.3C	5.08229	2.02013	4.86343	4.10363	3.79202	3.5829	5.72304	4.9002	7.71483	5.07589	4.62511	3.38646	3.35325	4.94069	6.2513	0.223423	0.216328	1.24464	2.57723	4.18454	5.34546	6.09783	4.33952	4.88477	5.10904	5.64896	5.9132	4.38186	4.56401	4.21956	10.6714	8.39713	11.8253	4.9806	7.06128	4.34214	BraA01g039930.3C	protein_coding	chrA01:26873223-26873774:+	gi|923884798|ref|XP_013713960.1|	759	6e-100	PREDICTED: RING-H2 finger protein ATL72-like [Brassica napus]	gi|685266976|ref|XM_009124302.1|	552	0	PREDICTED: Brassica rapa RING-H2 finger protein ATL72 (LOC103847239), mRNA	Q9SG96	251
BraA01g040060.3C	21.7032	1.3039	21.9102	20.247	19.4265	18.2082	4.91338	4.70921	4.35504	79.0489	73.5107	71.8117	109.934	101.651	100.131	28.2547	32.2844	60.1132	22.5423	18.0383	15.5184	19.6442	7.17845	8.13244	40.3686	49.4004	48.977	42.8644	42.5757	42.3371	45.3804	43.4331	42.4783	16.4634	13.9868	12.762	BraA01g040060.3C	protein_coding	chrA01:26929485-26932181:+	gi|923923558|ref|XP_013730909.1|	2930	0	PREDICTED: probable pectinesterase/pectinesterase inhibitor 25 isoform X3 [Brassica napus]	gi|685267001|ref|XM_009124413.1|	1842	0	PREDICTED: Brassica rapa probable pectinesterase/pectinesterase inhibitor 25 (LOC103847348), mRNA	Q94CB1	1046
BraA01g040070.3C	1.6699	0.867989	2.39698	0.288929	0.65264	0.735774	0.609868	0.333117	0.412654	2.58239	1.96995	2.75524	5.34365	4.75816	4.3134	0.880927	0.781872	1.22686	1.00558	2.2739	1.04284	0.222619	0.45627	0.356666	1.3989	1.79984	1.72703	1.5426	0.822364	2.05396	2.3932	2.53833	2.65848	0.595085	0	0.548732	BraA01g040070.3C	protein_coding	chrA01:26933428-26935823:-	gi|685267005|ref|XP_009122673.1|	2868	0	PREDICTED: putative pectinesterase/pectinesterase inhibitor 24 [Brassica rapa]	gi|685267004|ref|XM_009124425.1|	1680	0	PREDICTED: Brassica rapa putative pectinesterase/pectinesterase inhibitor 24 (LOC103847358), mRNA	Q9SG77	955
BraA01g040080.3C	1.50703	3.84654	1.0701	1.69298	1.34093	2.3404	1.59532	2.649	2.29458	1.95899	0.777381	1.33058	0.622532	0.351433	0.515802	2.12002	1.78495	1.88278	2.1265	2.05835	1.72289	2.02653	2.36319	3.13482	0.843106	0.84746	1.21976	1.35582	1.03256	0.386845	0.698818	0.900715	1.41223	0.684925	0.355265	0.826789	BraA01g040080.3C	protein_coding	chrA01:26940694-26942124:-	gi|685267007|ref|XP_009122683.1|	1919	0	PREDICTED: inactive protein RESTRICTED TEV MOVEMENT 2-like [Brassica rapa]	gi|685267006|ref|XM_009124435.1|	1338	0	PREDICTED: Brassica rapa inactive protein RESTRICTED TEV MOVEMENT 2-like (LOC103847366), mRNA	Q9M670	75.9
BraA01g040410.3C	0	0	0	0	0	0	0	0	0	0	0	0	0	0	0	0	0	0	13.1185	23.5453	22.4224	22.9918	29.8445	30.5602	16.1814	11.6178	11.891	11.3292	11.3244	7.54242	14.5618	11.1448	12.6722	38.6968	39.2224	40.0484	BraA01g040410.3C	protein_coding	chrA01:27217027-27217392:+	gi|685267082|ref|XP_009123001.1|	617	2e-80	PREDICTED: probable mediator of RNA polymerase II transcription subunit 37e [Brassica rapa]	gi|110797220|gb|AC189540.1|	366	0	Brassica rapa subsp. pekinensis clone KBrH003N18, complete sequence	P22954	186
BraA01g040700.3C	1.06688	0.317695	0.946953	0.128413	0.474647	0.218007	0.451754	0.246753	0.209602	0.47822	0.200122	0.423883	0.53865	0.447826	0.821599	0.195762	0.631816	0.908788	1.12907	1.22215	1.26849	0.445238	0.60836	0.317036	1.29321	2.64977	2.87838	0.731304	0.644991	0.410793	0.890494	0.931948	1.31788	0.573044	0.603612	0.585314	BraA01g040700.3C	protein_coding	chrA01:27365607-27367496:-	gi|685267189|ref|XP_009123322.1|	2946	0	PREDICTED: exocyst complex component EXO70B1-like [Brassica rapa]	gi|685267188|ref|XM_009125074.1|	1878	0	PREDICTED: Brassica rapa exocyst complex component EXO70B1-like (LOC103848089), mRNA	Q8VY27	447
BraA01g040720.3C	23.9657	17.0353	20.9082	19.784	19.5626	18.6763	16.7571	15.4728	15.1949	10.4181	11.341	11.7162	14.56	14.4288	15.7889	5.37887	3.62704	11.4151	4.43187	6.01959	6.96596	6.18965	5.67139	7.38887	8.41957	11.0388	9.88603	5.18043	5.44324	4.63582	6.04413	9.02495	7.29122	8.04569	9.10707	7.61045	BraA01g040720.3C	protein_coding	chrA01:27376908-27379785:+	gi|685267195|ref|XP_009123335.1|	2179	0	PREDICTED: protein notum homolog isoform X1 [Brassica rapa]	gi|685267194|ref|XM_009125087.1|	1284	0	PREDICTED: Brassica rapa protein notum homolog (LOC103848109), transcript variant X1, mRNA	Q9SR22	718
BraA01g040760.3C	0.364152	0.178147	0.464627	0.588059	0.828045	0.59901	0.531972	0.484282	0.308526	0.0938563	0.883717	0.554614	0.0961057	0.976568	0.35833	0	0	0	3.13924	4.33595	3.83008	5.1459	4.57691	5.08147	10.1523	8.92913	12.0515	5.47197	4.38835	3.22491	7.08789	9.72288	5.70811	5.19077	4.5412	6.12665	BraA01g040760.3C	protein_coding	chrA01:27418986-27419948:+	gi|685267199|ref|XP_009123345.1|	1728	0	PREDICTED: cytosolic sulfotransferase 11-like [Brassica rapa]	gi|685267198|ref|XM_009125097.1|	963	0	PREDICTED: Brassica rapa cytosolic sulfotransferase 11-like (LOC103848122), mRNA	Q8RV79	362
BraA01g040780.3C	1.84744	0.164325	2.05717	2.78966	1.9095	2.68374	1.14496	0.53605	0.569177	1.55834	0.543435	0.682111	2.48218	2.34208	3.30529	0.236264	0.686283	0.877451	3.23635	2.89329	3.00298	8.06035	5.69026	6.31339	5.76284	3.80139	3.995	1.82038	1.40119	1.32209	9.31436	10.1229	8.55602	3.99003	4.37099	4.76829	BraA01g040780.3C	protein_coding	chrA01:27425555-27426076:-	gi|685267212|ref|XP_009123394.1|	819	2e-109	PREDICTED: transcriptional regulator TAC1 [Brassica rapa]	gi|923908519|ref|XM_013868684.1|	522	0	PREDICTED: Brassica napus transcriptional regulator TAC1 (LOC106427962), mRNA	Q9SR34	218
BraA01g040800.3C	0.60432	0.29564	0.484667	0.0398326	0.0490773	0	0.252235	0.183698	0.19505	0.578526	0.605244	0.613598	0.136706	0.23152	0.0849512	0	0	0.0563798	0	0.0874849	0.136203	0	0.141531	0	0.0925715	0.0465247	0.0892851	0.0850668	0.320114	0.297324	0	0	0	0.205101	0.0468089	0	BraA01g040800.3C	protein_coding	chrA01:27434337-27437048:-	gi|297809575|ref|XP_002872671.1|	1816	0	predicted protein [Arabidopsis lyrata subsp. lyrata]	gi|567162346|ref|XM_006396665.1|	519	0	Eutrema salsugineum hypothetical protein (EUTSA_v10029284mg) mRNA, complete cds	B6SFA4	59.7
BraA01g040820.3C	803.574	444.746	797.568	870.765	879.601	880.384	983.254	1066.46	1031.67	1354.77	1340.05	1373.07	1118.21	1125.92	1099.57	169.466	192.591	372.357	940.59	790.063	774.651	557.19	423.156	429.847	923.164	955.99	959.812	897.112	870.476	883.823	1087.73	1099.16	1035.05	467.432	515.891	551.377	BraA01g040820.3C	protein_coding	chrA01:27455063-27458182:+	gi|674245550|gb|KFK38315.1|	1998	0	hypothetical protein AALP_AA3G097800 [Arabis alpina]	gi|685267216|ref|XM_009125168.1|	933	0	PREDICTED: Brassica rapa beta-glucosidase 23-like (LOC103848211), mRNA	Q9SR37	587
BraA01g040900.3C	0.495308	0.96924	1.36803	0.833467	0.993778	0.547735	0.936387	1.27091	1.08615	0.780982	0.785624	0.976242	1.07652	0.875114	0.917439	1.5575	2.22238	1.5222	0.797836	0.413351	0.582245	0.248588	0.636867	0.564217	0.499867	0.471046	0.421857	0.947396	0.837266	0.946093	0.435037	0.154045	0.228353	1.30131	0.821466	0.704653	BraA01g040900.3C	protein_coding	chrA01:27483876-27489067:+	gi|685267239|ref|XP_009123475.1|	4568	0	PREDICTED: mitogen-activated protein kinase-binding protein 1 [Brassica rapa]	gi|685267238|ref|XM_009125227.1|	2486	0	PREDICTED: Brassica rapa mitogen-activated protein kinase-binding protein 1 (LOC103848291), mRNA	Q6DFF9	219
BraA01g040920.3C	4.32545	2.68378	3.8767	4.47822	4.67793	4.46246	5.24002	5.49983	6.79314	2.28406	1.82061	1.39254	4.67761	3.50824	4.36011	1.63252	3.16136	6.33855	1.60495	2.45889	1.77539	8.2136	5.18863	6.00881	2.60186	3.41125	5.67364	1.03953	0.586779	0.519052	3.37552	2.78894	2.79063	2.30586	4.00411	3.99366	BraA01g040920.3C	protein_coding	chrA01:27496437-27498781:-	gi|685267245|ref|XP_009123494.1|	1306	5e-180	PREDICTED: uncharacterized protein LOC103848320 [Brassica rapa]	gi|685267244|ref|XM_009125246.1|	825	0	PREDICTED: Brassica rapa uncharacterized LOC103848320 (LOC103848320), mRNA	.	.
BraA01g040960.3C	1.64239	2.38272	1.67644	2.76984	2.96195	3.77964	6.83934	3.97674	4.73432	2.86098	1.95468	2.35765	2.51104	2.06556	3.34372	9.00275	9.79682	9.09845	4.65249	3.67301	2.62093	3.50323	4.45659	4.64495	1.7611	1.89228	1.17143	2.56701	2.51996	2.34056	2.83888	2.51523	2.7742	6.72738	4.7903	4.76418	BraA01g040960.3C	protein_coding	chrA01:27512579-27514509:-	gi|685267251|ref|XP_009123519.1|	1069	7e-137	PREDICTED: sialidase-like [Brassica rapa]	gi|685267250|ref|XM_009125271.1|	1548	0	PREDICTED: Brassica rapa sialidase-like (LOC103848351), mRNA	.	.
BraA01g041010.3C	31.6986	37.0022	27.8638	14.213	13.8374	13.7668	30.3355	27.0674	27.7303	19.9907	15.7967	18.6409	9.1461	9.29371	9.4049	3.9659	5.43213	4.93953	13.7381	14.2145	11.9329	4.32667	5.33567	4.77792	7.29931	6.22534	7.53798	8.60466	7.20265	7.23962	4.32675	4.14443	5.72595	9.80139	6.03967	5.49506	BraA01g041010.3C	protein_coding	chrA01:27558292-27560027:-	gi|685267328|ref|XP_009123848.1|	2128	0	PREDICTED: serine/threonine-protein kinase AtPK2/AtPK19-like [Brassica rapa]	gi|685267327|ref|XM_009125600.1|	1275	0	PREDICTED: Brassica rapa serine/threonine-protein kinase AtPK2/AtPK19-like (LOC103848765), mRNA	Q39030	697
BraA01g041260.3C	5.89591	6.77193	4.84068	7.0965	7.72343	8.19248	8.61305	6	5.50205	9.77835	11.1976	9.89061	14.3425	17.0488	16.396	13.7033	13.9665	11.886	12.0892	10.5206	4.85311	5.60454	3.78224	6.13214	6.4595	4.8351	5.30228	4.4203	6.77241	6.55827	5.05785	7.18323	7.91085	4.50663	1.94586	3.77373	BraA01g041260.3C	protein_coding	chrA01:27704069-27705361:-	gi|922411847|ref|XP_013636125.1|	1107	4e-151	PREDICTED: rho GDP-dissociation inhibitor 1-like [Brassica oleracea var. oleracea]	gi|923908552|ref|XM_013868700.1|	684	0	PREDICTED: Brassica napus rho GDP-dissociation inhibitor 1 (LOC106427975), mRNA	Q9SFC6	386
BraA01g041320.3C	0.248708	0.608353	0.380796	0	0	0	0.968868	0.264603	0	0.641019	0.938871	0.631316	0.525105	0.933766	0.856561	0.349872	0.508141	1.29937	1.2612	2.01625	1.9619	1.85674	1.49501	0.991581	1.20008	1.87643	0.514434	3.06331	3.45825	4.4051	2.38728	2.62991	2.80206	2.36346	2.02274	1.43838	BraA01g041320.3C	protein_coding	chrA01:27724571-27725508:+	gi|685267404|ref|XP_009124140.1|	1240	2e-171	PREDICTED: thymidine kinase-like [Brassica rapa]	gi|685267403|ref|XM_009125892.1|	705	0	PREDICTED: Brassica rapa thymidine kinase-like (LOC103849069), mRNA	Q9S750	392
BraA01g041420.3C	0.525253	1.96224	0.438662	0.220316	0.108579	0.403954	4.83642	0.812834	1.2946	2.01837	2.93562	2.27872	0.957759	1.12688	0.845764	0.940423	1.36584	0.935517	4.55226	6.33887	5.12273	3.81945	3.70533	3.86193	2.76489	4.88928	6.51869	20.7965	18.6794	17.5728	4.12508	4.69581	4.02314	9.30225	5.64407	4.97086	BraA01g041420.3C	protein_coding	chrA01:27766273-27770136:+	gi|674910902|emb|CDY22124.1|	2677	0	BnaC01g39770D [Brassica napus]	gi|685267445|ref|XM_009126018.1|	1323	0	PREDICTED: Brassica rapa probable glycosyltransferase At3g07620 (LOC103849201), mRNA	Q9SSE8	759
BraA01g041540.3C	32.1001	37.3333	33.0747	17.4655	19.1089	21.4912	33.0319	31.252	29.5913	26.8497	28.4163	24.5984	5.4347	3.89818	5.21482	1.06502	0.824962	3.16428	7.06401	9.51319	6.848	5.81348	3.14424	3.44962	3.73428	3.10077	2.97532	3.28234	2.66685	3.42682	0.968932	0.320222	1.78009	2.44612	0.820975	0.159218	BraA01g041540.3C	protein_coding	chrA01:27828921-27829499:-	gi|674873106|emb|CDY60822.1|	1023	4e-138	BnaAnng17250D [Brassica napus]	gi|922407194|ref|XM_013760873.1|	523	0	PREDICTED: Brassica oleracea var. oleracea uncharacterized LOC106322744 (LOC106322744), mRNA	.	.
BraA01g041600.3C	0	0.816931	0	0.963096	0.118662	0.392413	0.406579	0.555195	0.471604	0.430398	0	0	0.550892	0.559783	0.924299	0.293642	0	0.545273	0.10585	0	0.329318	0.333929	0.45627	0.237777	0.223825	0	0.107939	1.74827	1.16098	1.64317	0	0.220725	0	2.38034	2.15037	1.09746	BraA01g041600.3C	protein_coding	chrA01:27858959-27860091:+	gi|685267506|ref|XP_009124452.1|	1188	6e-162	PREDICTED: ninja-family protein AFP3-like [Brassica rapa]	gi|685267505|ref|XM_009126204.1|	840	0	PREDICTED: Brassica rapa ninja-family protein AFP3-like (LOC103849438), mRNA	Q94F39	97.1
BraA01g041680.3C	0.7731	0	0.631302	0.0713405	0.263693	0.218007	0	0	0	1.11585	1.084	2.19791	0.734522	0.580516	0.912888	0	0	0	0.470446	0.470058	0.24394	0.247355	0.168989	0.0880656	0.497388	0.499956	0.879506	0.837953	0.50166	0.532509	1.2368	2.1255	1.81776	0	0	0	BraA01g041680.3C	protein_coding	chrA01:27892977-27894916:-	gi|685267528|ref|XP_009124534.1|	1750	0	PREDICTED: serine/threonine-protein kinase At3g07070-like [Brassica rapa]	gi|685267527|ref|XM_009126286.1|	824	0	PREDICTED: Brassica rapa serine/threonine-protein kinase At3g07070-like (LOC103849528), mRNA	Q9SFT7	551
BraA01g041690.3C	0.711604	0.789081	0.581085	1.70731	1.61812	1.7391	1.24746	0.958972	1.07183	0.733633	1.27919	1.73407	1.40227	1.78113	1.86727	1.46821	1.80929	1.48711	1.0585	1.77874	1.39711	1.41667	1.76286	2.32373	1.3226	0.971506	1.07939	1.4491	1.36328	1.02698	0.80954	0.451482	0.464769	2.70493	2.05777	1.69608	BraA01g041690.3C	protein_coding	chrA01:27896680-27899562:+	gi|685267530|ref|XP_009124541.1|	2298	0	PREDICTED: guanine nucleotide-binding protein-like 3 homolog [Brassica rapa]	gi|685267529|ref|XM_009126293.1|	1239	0	PREDICTED: Brassica rapa guanine nucleotide-binding protein-like 3 homolog (LOC103849537), mRNA	Q9M8Z5	696
BraA01g041830.3C	0	0.126516	0	0.119322	0.294029	0.364631	0.251863	0.550281	0.584288	0.533237	0.139466	0.262583	1.63805	0.416122	0.381717	0.181902	0	0.50667	0.786853	0.393101	0.81601	1.24115	0.282645	0	0	0.278737	0.13373	2.166	2.99664	1.14513	1.37908	2.05098	2.15357	0.245758	1.12176	0.543876	BraA01g041830.3C	protein_coding	chrA01:27976740-27981966:+	gi|685267561|ref|XP_009124658.1|	1201	8e-166	PREDICTED: pre-mRNA-splicing factor cwf23-like [Brassica rapa]	gi|685267560|ref|XM_009126410.1|	678	0	PREDICTED: Brassica rapa pre-mRNA-splicing factor cwf23-like (LOC103849685), mRNA	Q5F3Z5	68.9
BraA01g041870.3C	83.4275	240.27	100.553	173.109	184.347	178.991	821.223	174.51	181.035	104.476	122.518	123.473	138.327	132.976	143.78	261.247	257.445	274.571	226.588	241.208	216.146	199.065	217.391	404.835	102.598	83.8233	71.1703	115.18	111.417	114.094	99.5343	97.6884	106.669	410.736	83.8242	87.7263	BraA01g041870.3C	protein_coding	chrA01:27989293-27989570:+	gi|685267572|ref|XP_009124698.1|	314	3e-36	PREDICTED: 60S ribosomal protein L29-1-like [Brassica rapa]	gi|685267571|ref|XM_009126450.1|	186	6e-92	PREDICTED: Brassica rapa 60S ribosomal protein L29-1-like (LOC103849728), mRNA	Q84WM0	119
BraA01g042000.3C	118.987	160.689	113.369	45.8686	45.1285	45.6104	117.3	130.853	129.067	61.2882	59.7982	59.7134	42.0943	43.9456	48.3745	5.2508	5.95206	21.2843	111.997	154.065	162.108	103.598	101.986	106.918	141.546	149.146	152.151	54.1815	55.7827	57.0631	116.805	110.225	111.308	180.466	188.262	164.367	BraA01g042000.3C	protein_coding	chrA01:28059511-28061663:-	gi|685267616|ref|XP_009124852.1|	1431	0	PREDICTED: transcription factor MYB108 [Brassica rapa]	gi|685267615|ref|XM_009126604.1|	963	0	PREDICTED: Brassica rapa transcription factor MYB108 (LOC103849889), mRNA	Q9LDE1	480
BraA01g042040.3C	0.378702	1.35861	0.57983	2.15501	2.79868	2.37312	4.79464	2.82034	1.99642	1.5617	1.49768	1.53807	1.73239	1.89577	1.98745	3.81798	6.79168	3.13267	1.60033	0.959405	1.19493	2.7599	4.20793	4.88907	1.35358	0.952401	0.652765	1.55481	0.936142	1.49057	2.35606	1.26809	1.91689	1.55947	2.39555	3.18573	BraA01g042040.3C	protein_coding	chrA01:28112875-28114659:+	gi|685267634|ref|XP_009124920.1|	1875	0	PREDICTED: zinc finger CCCH domain-containing protein 34-like isoform X1 [Brassica rapa]	gi|685267633|ref|XM_009126672.1|	1229	0	PREDICTED: Brassica rapa zinc finger CCCH domain-containing protein 34-like (LOC103849971), transcript variant X1, mRNA	Q9SQU4	508
BraA01g042090.3C	71.7341	44.0403	71.1192	88.2752	92.0944	96.6481	80.1287	82.8395	84.6355	34.8796	37.1779	38.1353	60.3023	60.9074	62.8193	33.7984	36.4651	60.9681	25.3117	33.9861	38.7815	49.2601	41.7456	40.5498	45.4259	53.2705	56.4907	19.857	18.3628	18.2375	39.3252	39.0934	36.3636	36.1111	28.1804	27.6355	BraA01g042090.3C	protein_coding	chrA01:28137352-28140957:+	gi|685267647|ref|XP_009124925.1|	2928	0	PREDICTED: bifunctional 3-dehydroquinate dehydratase/shikimate dehydrogenase, chloroplastic [Brassica rapa]	gi|685267646|ref|XM_009126677.1|	1788	0	PREDICTED: Brassica rapa bifunctional 3-dehydroquinate dehydratase/shikimate dehydrogenase, chloroplastic (LOC103849983), mRNA	Q9SQT8	971
BraA01g042180.3C	4.07439	2.61182	6.5968	41.4872	37.5382	45.1652	8.34659	13.3033	14.1255	19.699	24.2456	20.2567	43.1602	37.8284	38.2952	136.177	124.963	70.8331	9.83187	5.97968	5.91084	17.9808	16.5837	14.5638	21.3925	12.72	11.7695	9.55222	10.2888	13.41	21.1278	20.799	22.5735	16.8226	17.3684	21.2739	BraA01g042180.3C	protein_coding	chrA01:28199079-28200134:+	gi|685267680|ref|XP_009124942.1|	900	1e-120	PREDICTED: uncharacterized GPI-anchored protein At3g06035-like [Brassica rapa]	gi|923524150|ref|XM_013821918.1|	624	0	PREDICTED: Brassica napus uncharacterized GPI-anchored protein At3g06035-like (LOC106381973), mRNA	Q84MC0	296
BraA01g042240.3C	217.675	110.216	205.361	66.2643	66.8766	64.2115	173.317	175.385	164.779	113.43	111.934	108.036	39.5512	45.6821	42.028	0.175683	0.680417	0.489348	44.2039	65.555	71.4555	34.4965	28.7996	25.4645	47.5388	29.3436	28.2856	174.986	160.685	170.444	35.4295	37.9005	34.9919	28.4827	22.7515	24.5569	BraA01g042240.3C	protein_coding	chrA01:28226746-28228407:+	gi|685267694|ref|XP_009124949.1|	1134	2e-155	PREDICTED: germin-like protein subfamily 1 member 7 [Brassica rapa]	gi|685267693|ref|XM_009126701.1|	659	0	PREDICTED: Brassica rapa germin-like protein subfamily 1 member 7 (LOC103850001), mRNA	Q9SFF9	418
BraA01g042270.3C	0	0	0.171431	0.0774905	0	0.315734	0	0	0	0.0865744	0	0.170528	0	0	0	0	0	0	0.85167	0.680773	0.441615	0.806035	1.10134	0.573945	0.900444	0.271528	0.78163	1.98587	1.71256	1.90051	0.537367	0.799175	0.411347	0.558604	0.182124	0.264905	BraA01g042270.3C	protein_coding	chrA01:28233211-28234675:+	gi|685267700|ref|XP_009124953.1|	1083	6e-144	PREDICTED: FK506-binding protein 5-like isoform X1 [Brassica rapa]	gi|685267699|ref|XM_009126705.1|	1044	0	PREDICTED: Brassica rapa FK506-binding protein 5-like (LOC103850004), transcript variant X1, mRNA	.	.
BraA01g042310.3C	0	0.317695	0.331434	0.59926	0	0.61042	0.632456	0	0.366803	0.334754	0.700428	1.97812	2.39944	0.348309	0.319511	0.456777	0.442271	3.39281	0.658625	0.32904	1.02455	0.346297	0.354877	0.739751	1.04451	2.44979	1.67906	2.23962	2.10697	1.91703	2.77043	2.40345	4.13541	12.3425	11.9716	6.82866	BraA01g042310.3C	protein_coding	chrA01:28252212-28252481:-	gi|685267711|ref|XP_009124959.1|	372	3e-44	PREDICTED: uncharacterized protein LOC103850009 [Brassica rapa]	gi|685267710|ref|XM_009126711.1|	270	2e-138	PREDICTED: Brassica rapa uncharacterized LOC103850009 (LOC103850009), mRNA	.	.
BraA01g042330.3C	2.43527	1.51627	1.95847	2.17913	2.01366	2.15034	5.60586	4.86777	5.08523	4.26051	3.82052	3.67152	12.0751	12.3492	12.9983	0.622878	0.703613	3.75908	2.99375	4.48691	3.95847	6.45371	4.59727	4.20313	9.49559	11.374	11.0665	4.14475	2.32588	2.83198	13.2225	13.1097	12.4351	6.8024	6.48197	5.74228	BraA01g042330.3C	protein_coding	chrA01:28259929-28262376:-	gi|685267716|ref|XP_009124961.1|	2042	0	PREDICTED: shaggy-related protein kinase gamma-like [Brassica rapa]	gi|685267715|ref|XM_009126713.1|	813	0	PREDICTED: Brassica rapa shaggy-related protein kinase gamma-like (LOC103850011), mRNA	P43289	701
BraA01g042440.3C	0.0916088	0.0896319	0.46754	0	0.208309	0	0	0	0	0.377779	0.296419	0.558091	0	0.0982691	0.180288	0	0	0.119652	0.278728	0.278498	0.192705	0.0977012	0.600732	0.104354	0.982302	1.28359	1.13692	0.541601	0.594443	0.811283	1.07473	1.35618	0.448742	0.0870552	0	0	BraA01g042440.3C	protein_coding	chrA01:28322440-28323620:-	gi|674914355|emb|CDY18815.1|	1684	0	BnaAnng02800D [Brassica napus]	gi|685385956|ref|XM_009126624.1|	951	0	PREDICTED: Brassica rapa serine/threonine-protein phosphatase PP1 isozyme 9-like (LOC103849914), mRNA	Q9M9W3	618
BraA01g042500.3C	11.8065	10.5686	12.906	44.8157	41.8887	42.4233	64.9128	66.6361	68.8623	19.7687	19.9592	21.4249	22.1872	24.701	23.1531	36.516	37.0671	17.7175	29.1286	20.0253	22.8101	41.0793	59.5766	56.5623	46.0604	28.7898	30.1364	18.8942	18.3185	19.6922	54.4758	53.834	53.0758	21.1661	19.7947	32.2258	BraA01g042500.3C	protein_coding	chrA01:28346872-28348861:-	gi|685385943|ref|XP_009124867.1|	1789	0	PREDICTED: probable protein phosphatase 2C 34 [Brassica rapa]	gi|685385942|ref|XM_009126619.1|	1047	0	PREDICTED: Brassica rapa probable protein phosphatase 2C 34 (LOC103849908), mRNA	Q9M9W9	622
BraA01g042510.3C	11.6064	9.93643	13.5394	53.7421	52.43	49.97	27.9559	31.3114	32.6611	24.0382	28.5015	30.9345	15.7532	20.2316	17.1312	30.0306	24.9836	23.8219	8.30288	3.78046	3.59681	11.4941	25.3699	23.8452	15.001	7.14831	7.60934	3.88019	6.05194	5.20046	13.2627	12.8208	14.721	4.43148	5.05686	8.82641	BraA01g042510.3C	protein_coding	chrA01:28357392-28359095:-	gi|685385935|ref|XP_009124864.1|	1302	3e-179	PREDICTED: nuclear transcription factor Y subunit A-2-like isoform X1 [Brassica rapa]	gi|685385939|ref|XM_009126618.1|	772	0	PREDICTED: Brassica rapa nuclear transcription factor Y subunit A-2-like (LOC103849907), transcript variant X3, mRNA	Q9M9X4	386
BraA01g042640.3C	36.2877	27.9486	33.2329	31.9065	32.8262	30.8922	26.4093	28.8968	29.7408	35.1492	37.6243	34.929	37.4275	36.3371	35.7507	43.7642	41.1193	36.851	24.3869	18.7197	18.5526	20.8246	28.6779	27.2408	35.4759	33.6727	34.3072	16.9917	18.8326	15.1117	28.5934	28.2103	28.1999	36.819	33.4978	37.9268	BraA01g042640.3C	protein_coding	chrA01:28433969-28438309:-	gi|685383433|ref|XP_009124023.1|	3324	0	PREDICTED: acyl-CoA-binding domain-containing protein 4-like isoform X1 [Brassica rapa]	gi|685383432|ref|XM_009125775.1|	1995	0	PREDICTED: Brassica rapa acyl-CoA-binding domain-containing protein 4-like (LOC103848945), transcript variant X1, mRNA	Q9MA55	1158
BraA01g042730.3C	1.02418	3.07304	1.25449	0.50405	1.16444	0.898515	3.7238	2.90569	3.47092	0.422353	1.031	0.831921	0.720793	0.659184	0.671869	2.40128	2.23202	1.24852	2.35443	3.66711	3.94977	2.54868	3.8058	4.58887	2.34284	5.00424	3.8838	2.75841	2.9115	3.35929	1.52924	2.02159	1.40473	4.28238	4.22035	4.3796	BraA01g042730.3C	protein_coding	chrA01:28478204-28479487:+	gi|685383559|ref|XP_009124074.1|	2219	0	PREDICTED: uncharacterized protein LOC103849000 [Brassica rapa]	gi|685383561|ref|XM_009125827.1|	1284	0	PREDICTED: Brassica rapa uncharacterized LOC103849000 (LOC103849000), transcript variant X2, mRNA	Q9MA87	731
BraA01g042810.3C	0	1.05898	0.441911	3.19605	3.6917	3.0521	11.595	2.53333	5.37978	2.45486	3.96909	3.95625	9.59775	6.03736	8.7333	32.2789	24.7672	31.3835	2.85404	1.53552	1.36606	3.2321	0.946338	3.20559	1.16057	0.466626	0.447748	1.91967	2.60863	1.91703	6.23346	5.26469	11.2398	0.617125	1.17369	2.50384	BraA01g042810.3C	protein_coding	chrA01:28509421-28510260:-	gi|685383531|ref|XP_009124065.1|	681	1e-89	PREDICTED: acyl carrier protein, chloroplastic [Brassica rapa]	gi|923926963|ref|XM_013876962.1|	405	0	PREDICTED: Brassica napus acyl carrier protein, chloroplastic (LOC106436010), mRNA	P08971	265
BraA01g042940.3C	265.845	77.4533	269.216	245.886	254.447	246.525	173.885	184.446	174.115	211.658	225.688	228.361	226.753	226.313	244.123	79.7914	83.9755	124.654	138.186	123.328	117.11	128.875	201.606	199.03	172.279	129.71	137.215	80.7964	68.6956	66.9748	202.916	202.359	205.965	63.0405	64.7164	58.6055	BraA01g042940.3C	protein_coding	chrA01:28581774-28583336:+	gi|685267757|ref|XP_009124981.1|	1063	2e-144	PREDICTED: auxin-responsive protein IAA16-like [Brassica rapa]	gi|685267756|ref|XM_009126733.1|	711	0	PREDICTED: Brassica rapa auxin-responsive protein IAA16-like (LOC103850030), mRNA	O24407	372
BraA01g043180.3C	2.21994	0.818966	2.34026	1.54479	1.11717	1.12886	0.956953	1.08412	1.35667	2.58882	2.35511	2.54964	3.3424	3.20115	2.82904	1.79184	1.98278	2.70939	2.25146	2.39712	2.9856	1.31964	1.98872	1.69968	2.84868	4.82461	4.51652	3.33493	4.45309	3.83168	3.53203	2.96315	3.38708	1.66001	1.89428	1.91339	BraA01g043180.3C	protein_coding	chrA01:28706238-28709406:-	gi|685267818|ref|XP_009125007.1|	4032	0	PREDICTED: glutamate receptor 1.1 [Brassica rapa]	gi|685267817|ref|XM_009126759.1|	2403	0	PREDICTED: Brassica rapa glutamate receptor 1.1 (LOC103850056), mRNA	Q9M8W7	1046
BraA01g043230.3C	60.8953	17.7306	55.9919	23.8783	25.151	25.5507	36.8079	37.0833	36.4242	51.2511	55.731	49.8122	38.6917	37.74	42.7324	6.0861	8.67247	9.7022	31.1283	29.2828	29.0193	26.2044	20.2518	22.2235	57.7693	56.4839	53.0169	18.5801	21.1117	15.2613	36.652	34.4404	37.3466	11.5582	13.1007	14.6778	BraA01g043230.3C	protein_coding	chrA01:28728525-28729983:+	gi|685267828|ref|XP_009125011.1|	1906	0	PREDICTED: NAC domain-containing protein 67-like [Brassica rapa]	gi|685267827|ref|XM_009126763.1|	1074	0	PREDICTED: Brassica rapa NAC domain-containing protein 67-like (LOC103850060), mRNA	Q84TD6	596
BraA01g043310.3C	19.877	51.5182	17.1987	15.3054	13.3201	15.0955	68.0744	64.4226	69.2961	17.2353	13.204	16.9744	19.5939	20.3337	18.0049	41.8506	34.784	62.9275	20.6933	13.7397	15.7835	23.726	43.3045	38.537	14.8208	13.1948	12.5249	13.2302	15.9853	11.7872	16.8472	18.6522	18.0548	62.7966	54.3863	46.924	BraA01g043310.3C	protein_coding	chrA01:28783454-28784119:+	gi|923916148|ref|XP_013727576.1|	776	1e-92	PREDICTED: disease resistance protein TAO1-like [Brassica napus]	gi|923604685|ref|XM_013886826.1|	357	0	PREDICTED: Brassica napus disease resistance protein TAO1-like (LOC106445304), mRNA	Q9FI14	128
BraA01g043400.3C	0	0.277598	0.144801	0.327266	0.241932	0.533377	1.51974	1.35834	1.44228	24.1316	21.9564	24.0544	2.39611	2.51087	3.42001	1.79606	1.73903	1.94551	0.359686	0.718778	1.04444	0.605178	0.0775216	0.323192	0.532398	2.14059	1.46714	3.1451	3.28758	1.95426	9.68304	11.2505	10.9099	10.0433	14.1527	11.4115	BraA01g043400.3C	protein_coding	chrA01:28817388-28819156:-	gi|685327576|ref|XP_009102088.1|	2181	0	PREDICTED: probable glutamate dehydrogenase 3 [Brassica rapa]	gi|685327575|ref|XM_009103840.1|	1236	0	PREDICTED: Brassica rapa probable glutamate dehydrogenase 3 (LOC103828225), mRNA	Q9S7A0	816
BraA01g043550.3C	0	0	0	0	0	0	0	0	0	0	0	0	0	0	0	0	0	0	0.0932016	0	0	0.686059	0.502184	0.418727	0.0985391	0.297144	0.380164	0.181101	0.170375	0.0904261	0.392041	0.0971744	0.540184	0.611303	0.298959	0.48316	BraA01g043550.3C	protein_coding	chrA01:28890616-28891924:+	gi|685327650|ref|XP_009102117.1|	1663	0	PREDICTED: peroxidase 57 [Brassica rapa]	gi|685327649|ref|XM_009103869.1|	954	0	PREDICTED: Brassica rapa peroxidase 57 (LOC103828256), mRNA	Q43729	418
BraA01g043560.3C	12.9771	4.26466	15.0662	20.1108	20.9488	21.9751	12.156	11.0663	8.05724	1.12341	0.747914	0.603495	10.1439	9.67001	14.6217	11.2878	14.1677	15.5264	7.93699	8.33197	8.54367	17.9605	20.3543	19.2962	16.6768	20.7134	18.5436	4.5877	6.88719	5.45867	12.8895	12.4653	14.0723	20.4279	18.1544	17.2916	BraA01g043560.3C	protein_coding	chrA01:28904897-28906280:+	gi|685327517|ref|XP_009102064.1|	1105	7e-149	PREDICTED: WUSCHEL-related homeobox 11-like isoform X1 [Brassica rapa]	gi|685327516|ref|XM_009103816.1|	875	0	PREDICTED: Brassica rapa WUSCHEL-related homeobox 11-like (LOC103828205), transcript variant X1, mRNA	Q6X7J3	341
BraA01g043570.3C	113.534	49.2976	112.402	58.6861	57.476	61.463	36.8569	41.2163	40.5381	64.469	66.5406	68.9501	84.985	86.1765	84.3399	40.1649	39.5756	42.5564	66.8845	64.1062	67.0666	55.4074	49.0709	48.9766	95.0268	95.3969	96.1115	117.111	109.656	114.141	69.9771	73.7017	75.0845	69.3733	68.2966	57.7493	BraA01g043570.3C	protein_coding	chrA01:28909991-28913218:-	gi|685327515|ref|XP_009102063.1|	2737	0	PREDICTED: probable inactive beta-glucosidase 25 [Brassica rapa]	gi|685327514|ref|XM_009103815.1|	1566	0	PREDICTED: Brassica rapa probable inactive beta-glucosidase 25 (LOC103828204), mRNA	O82772	933
BraA01g043630.3C	5.66035	2.31832	4.52362	4.98034	4.34025	5.19682	12.35	11.5774	10.9545	5.83558	5.9631	5.83635	3.65938	4.04792	5.05173	0.987626	1.13556	1.0316	9.03384	6.53634	6.87646	8.75101	9.1117	8.94699	9.55119	9.83698	8.07762	6.91774	6.95544	8.4194	14.2733	12.8524	12.6384	3.91958	3.52107	4.38326	BraA01g043630.3C	protein_coding	chrA01:28934613-28938322:+	gi|685266355|ref|XP_009119295.1|	2859	0	PREDICTED: non-specific phospholipase C4 [Brassica rapa]	gi|685266354|ref|XM_009121047.1|	1676	0	PREDICTED: Brassica rapa non-specific phospholipase C4 (LOC103844249), mRNA	Q9SRQ7	962
BraA01g043640.3C	1.86065	1.07088	0.893754	0.605993	0.746637	0.823038	1.17253	0.698672	1.36006	0.902708	0.708298	0.222261	1.96423	2.23075	1.4001	2.30955	1.34172	2.5732	3.10812	0.8873	0.575588	3.03496	2.39243	1.87016	6.22014	4.95462	3.16946	7.65713	9.23279	6.8927	3.61867	3.2406	2.46623	1.66416	2.49244	1.61126	BraA01g043640.3C	protein_coding	chrA01:28939656-28941199:-	gi|685266352|ref|XP_009119282.1|	1405	0	PREDICTED: putative deoxyribonuclease tatdn3 [Brassica rapa]	gi|685266351|ref|XM_009121034.1|	801	0	PREDICTED: Brassica rapa putative deoxyribonuclease tatdn3 (LOC103844241), mRNA	P37545	127
[truncated: 5,085 more rows]
[truncated: 14 more columns]
