# Supplementary material for: Transcriptome and Coexpression Network Analyses Reveal Hub Genes in Chinese Cabbage (Brassica rapa L. ssp. pekinensis) During Different Stages of Plasmodiophora brassicae Infection
Source: Front Plant Sci. 2021 Aug 10;12:650252. doi: 10.3389/fpls.2021.650252 (PMC8383047; doi:10.3389/fpls.2021.650252)
Supplement: Supplementary Table 6 — The module membership and gene significance of genes in three modules of WGCNA. [file Table_6.xls]

## Sheet: green yellow_Module_membership
Table S6 The module membership and gene significance of genes in green yellow module of WGCNA.
GeneID （452）	Module Membership	gene significance
BraA01g000670.3C	0.533295	0.386436
BraA01g001030.3C	0.851723	0.723096
BraA01g001620.3C	0.870111	0.650128
BraA01g002240.3C	0.902525	0.771186
BraA01g003730.3C	0.270928	0.0140699
BraA01g004240.3C	0.869172	0.690955
BraA01g005180.3C	0.925511	0.951366
BraA01g006120.3C	0.672492	0.694227
BraA01g006180.3C	0.483749	0.271368
BraA01g006580.3C	0.627964	0.560687
BraA01g007590.3C	0.522955	0.391735
BraA01g007940.3C	0.832622	0.652559
BraA01g007990.3C	0.929061	0.929984
BraA01g008200.3C	0.593806	0.483058
BraA01g008360.3C	0.730653	0.56031
BraA01g008780.3C	0.896901	0.822855
BraA01g008880.3C	0.936917	0.782965
BraA01g009460.3C	0.403244	0.224279
BraA01g011090.3C	0.659021	0.483092
BraA01g013160.3C	0.727867	0.510585
BraA01g013400.3C	0.940794	0.953256
BraA01g014260.3C	0.928754	0.871701
BraA01g014380.3C	0.616227	0.321767
BraA01g014870.3C	0.619926	0.537137
BraA01g014980.3C	0.787253	0.688402
BraA01g015210.3C	0.571673	0.351104
BraA01g016470.3C	0.852715	0.647368
BraA01g016990.3C	0.543174	0.36009
BraA01g017010.3C	0.969486	0.950249
BraA01g017450.3C	0.617399	0.642826
BraA01g017540.3C	0.748277	0.646018
BraA01g017930.3C	0.64034	0.517291
BraA01g017940.3C	0.512488	0.375732
BraA01g019280.3C	0.610552	0.739631
BraA01g020990.3C	0.266045	0.0846358
BraA01g021960.3C	0.474904	0.316129
BraA01g022350.3C	0.90804	0.883854
BraA01g022380.3C	0.679167	0.56335
BraA01g023460.3C	0.642752	0.430537
BraA01g023560.3C	0.749768	0.643502
BraA01g024310.3C	0.329369	0.329203
BraA01g025150.3C	0.70841	0.522855
BraA01g025220.3C	0.740239	0.529545
BraA01g025690.3C	0.561415	0.351015
BraA01g027650.3C	0.718311	0.496465
BraA01g028200.3C	0.772784	0.646785
BraA01g028800.3C	0.562239	0.276536
BraA01g028920.3C	0.889369	0.961506
BraA01g029280.3C	0.764491	0.601437
BraA01g029490.3C	0.259903	0.0138155
BraA01g029670.3C	0.363612	0.148089
BraA01g031440.3C	0.895186	0.731239
BraA01g032790.3C	0.951452	0.920955
BraA01g033540.3C	0.369309	0.503155
BraA01g034170.3C	0.890665	0.732041
BraA01g034180.3C	0.307927	0.049572
BraA01g034240.3C	0.779299	0.679609
BraA01g034510.3C	0.793375	0.670675
BraA01g037120.3C	0.958971	0.917734
BraA01g037440.3C	0.3539	0.440751
BraA01g037460.3C	0.776421	0.562691
BraA01g037470.3C	0.618982	0.394175
BraA01g037480.3C	0.871127	0.760597
BraA01g037820.3C	0.851938	0.742671
BraA01g038300.3C	0.855671	0.886206
BraA01g038420.3C	0.40642	0.156724
BraA01g038610.3C	0.9158	0.885285
BraA01g038670.3C	0.841633	0.695382
BraA01g039710.3C	0.804901	0.882663
BraA01g039820.3C	0.822882	0.844662
BraA01g040410.3C	0.510137	0.601214
BraA01g040760.3C	0.79286	0.627648
BraA01g040780.3C	0.687576	0.592488
BraA01g042730.3C	0.921343	0.959503
BraA01g043990.3C	0.750721	0.544592
BraA02g000390.3C	0.712634	0.51418
BraA02g000520.3C	0.751558	0.625812
BraA02g000740.3C	0.758733	0.699738
BraA02g001230.3C	0.921539	0.866058
BraA02g002960.3C	0.751105	0.703922
BraA02g004140.3C	0.330222	0.213826
BraA02g006220.3C	0.708145	0.786436
BraA02g008710.3C	0.863996	0.780764
BraA02g008940.3C	0.543146	0.533862
BraA02g009120.3C	0.856414	0.741261
BraA02g009340.3C	0.376217	0.298214
BraA02g012100.3C	0.91118	0.839473
BraA02g014340.3C	0.725771	0.71579
BraA02g015030.3C	0.549315	0.371142
BraA02g020850.3C	0.56908	0.435225
BraA02g023420.3C	0.647907	0.5946
BraA02g026450.3C	0.861396	0.88497
BraA02g030070.3C	0.549997	0.503088
BraA02g036460.3C	0.346661	0.196213
BraA02g037830.3C	0.423774	0.456857
BraA02g038460.3C	0.908901	0.886669
BraA02g039210.3C	0.724872	0.543888
BraA02g039230.3C	0.659959	0.626362
BraA02g041640.3C	0.853664	0.787995
BraA03g004530.3C	0.906367	0.859333
BraA03g005070.3C	0.883634	0.860242
BraA03g006500.3C	0.856206	0.795622
BraA03g007110.3C	0.748633	0.604368
BraA03g007900.3C	0.927556	0.861442
BraA03g009800.3C	0.886372	0.71491
BraA03g011150.3C	0.671431	0.534067
BraA03g012150.3C	0.693527	0.713485
BraA03g014530.3C	0.850563	0.734456
BraA03g014690.3C	0.561011	0.551129
BraA03g014760.3C	0.912343	0.844464
BraA03g018370.3C	0.818292	0.738237
BraA03g018610.3C	0.588029	0.371349
BraA03g021820.3C	0.746383	0.82924
BraA03g021970.3C	0.891358	0.802477
BraA03g022010.3C	0.215013	0.158873
BraA03g025870.3C	0.833868	0.825707
BraA03g032320.3C	0.404069	0.170706
BraA03g033740.3C	0.697572	0.64534
BraA03g035250.3C	0.834385	0.835934
BraA03g037500.3C	0.953327	0.923749
BraA03g038010.3C	0.928706	0.867861
BraA03g038530.3C	0.858374	0.837164
BraA03g039870.3C	0.807264	0.768506
BraA03g042280.3C	0.941865	0.882866
BraA03g045190.3C	0.832623	0.758381
BraA03g045670.3C	0.912832	0.848654
BraA03g046300.3C	0.861677	0.81876
BraA03g050520.3C	0.489454	0.425888
BraA03g051000.3C	0.866167	0.661823
BraA03g052750.3C	0.84861	0.749606
BraA03g054450.3C	0.725187	0.69333
BraA03g056520.3C	0.868193	0.856547
BraA03g056530.3C	0.700694	0.444919
BraA03g056920.3C	0.922625	0.872231
BraA03g058030.3C	0.511717	0.415509
BraA03g059750.3C	0.859806	0.746783
BraA04g000330.3C	0.725687	0.631796
BraA04g001110.3C	0.686658	0.672079
BraA04g002470.3C	0.902167	0.853427
BraA04g002720.3C	0.580277	0.34436
BraA04g006090.3C	0.643548	0.489561
BraA04g007020.3C	0.882209	0.831612
BraA04g008250.3C	0.371688	0.583654
BraA04g009070.3C	0.387921	0.218181
BraA04g011270.3C	0.585719	0.381484
BraA04g011890.3C	0.83205	0.733391
BraA04g012010.3C	0.962275	0.804592
BraA04g013430.3C	0.938911	0.893136
BraA04g014100.3C	0.793492	0.808552
BraA04g017120.3C	0.687373	0.495295
BraA04g018630.3C	0.729159	0.627785
BraA04g018780.3C	0.907162	0.944002
BraA04g021010.3C	0.592846	0.439996
BraA04g023690.3C	0.88107	0.943808
BraA04g026500.3C	0.820846	0.632633
BraA04g027650.3C	0.909686	0.845745
BraA04g027790.3C	0.683547	0.678519
BraA04g028490.3C	0.765883	0.647322
BraA04g028960.3C	0.935056	0.839859
BraA04g029400.3C	0.764674	0.748837
BraA04g029440.3C	0.807843	0.599984
BraA04g030370.3C	0.923277	0.754518
BraA04g030590.3C	0.858327	0.963811
BraA04g030780.3C	0.904902	0.815781
BraA04g030990.3C	0.439988	0.312506
BraA04g031050.3C	0.847929	0.808056
BraA04g031860.3C	0.869517	0.677998
BraA04g031970.3C	0.953091	0.919763
BraA04g032110.3C	0.579384	0.409515
BraA04g032340.3C	0.446293	0.483133
BraA05g000070.3C	0.839514	0.702021
BraA05g000480.3C	0.689311	0.635682
BraA05g001850.3C	0.439682	0.532414
BraA05g001920.3C	0.0685677	0.0486185
BraA05g005870.3C	0.799165	0.727976
BraA05g005950.3C	0.82191	0.867422
BraA05g007690.3C	0.914591	0.795354
BraA05g011190.3C	0.839593	0.661174
BraA05g014950.3C	0.497231	0.26025
BraA05g016340.3C	0.89893	0.741266
BraA05g019830.3C	0.394077	0.492181
BraA05g020110.3C	0.732807	0.624467
BraA05g020140.3C	0.719226	0.753464
BraA05g024380.3C	0.889134	0.844162
BraA05g025020.3C	0.725597	0.680632
BraA05g025470.3C	0.808617	0.805684
BraA05g025900.3C	0.85357	0.957743
BraA05g026300.3C	0.791121	0.94592
BraA05g028850.3C	0.453792	0.378308
BraA05g029270.3C	0.595492	0.727817
BraA05g030800.3C	0.571951	0.408415
BraA05g031130.3C	0.868466	0.710343
BraA05g031400.3C	0.825067	0.956524
BraA05g031920.3C	0.877036	0.726966
BraA05g033590.3C	0.817777	0.646607
BraA05g034130.3C	0.467151	0.436384
BraA05g034280.3C	0.59926	0.422258
BraA05g034360.3C	0.950221	0.871358
BraA05g034600.3C	0.53846	0.531539
BraA05g035590.3C	0.891201	0.834315
BraA05g036220.3C	0.789418	0.71347
BraA05g037490.3C	0.526072	0.434459
BraA05g037750.3C	0.751291	0.456904
BraA05g038150.3C	0.672565	0.572297
BraA05g039360.3C	0.71815	0.613471
BraA05g039440.3C	0.663173	0.495797
BraA05g040520.3C	0.896211	0.879057
BraA05g040690.3C	0.672386	0.502387
BraA05g040740.3C	0.85041	0.699916
BraA05g041080.3C	0.852887	0.84589
BraA05g041680.3C	0.609683	0.457855
BraA05g041700.3C	0.888577	0.943039
BraA05g041960.3C	0.279197	0.214918
BraA05g042030.3C	0.881783	0.702737
BraA05g042170.3C	0.113064	0.100459
BraA05g042630.3C	0.677704	0.557399
BraA06g000230.3C	0.216511	0.0979326
BraA06g001510.3C	0.505745	0.310681
BraA06g001770.3C	0.942061	0.839369
BraA06g006630.3C	0.487911	0.428121
BraA06g009840.3C	0.942151	0.927541
BraA06g015500.3C	0.444155	0.421757
BraA06g015560.3C	0.535521	0.349937
BraA06g016570.3C	0.739042	0.649499
BraA06g018120.3C	0.833369	0.750067
BraA06g018300.3C	0.746884	0.583889
BraA06g019050.3C	0.662424	0.428622
BraA06g019140.3C	0.752972	0.64202
BraA06g020240.3C	0.959672	0.834397
BraA06g021160.3C	0.810616	0.679087
BraA06g021550.3C	0.892507	0.809747
BraA06g022370.3C	0.899334	0.936419
BraA06g028450.3C	0.522617	0.464891
BraA06g029540.3C	0.828449	0.806572
BraA06g030420.3C	0.707565	0.496213
BraA06g030560.3C	0.498564	0.586371
BraA06g030640.3C	0.37137	0.278857
BraA06g031440.3C	0.944941	0.896719
BraA06g031820.3C	0.729844	0.72854
BraA06g032610.3C	0.416895	0.471519
BraA06g032950.3C	0.669371	0.844772
BraA06g033000.3C	0.56415	0.494847
BraA06g035380.3C	0.589613	0.515336
BraA06g036110.3C	0.814591	0.663503
BraA06g036510.3C	0.514964	0.477287
BraA06g036590.3C	0.821659	0.816704
BraA06g036830.3C	0.712446	0.51925
BraA06g036930.3C	0.626187	0.493127
BraA06g037430.3C	0.967231	0.858602
BraA06g037560.3C	0.705817	0.433607
BraA06g037980.3C	0.439977	0.308298
BraA06g038920.3C	0.670852	0.51488
BraA06g039020.3C	0.898871	0.910193
BraA06g039030.3C	0.74827	0.5473
BraA06g039130.3C	0.757564	0.666455
BraA06g039370.3C	0.9147	0.78986
BraA06g040130.3C	0.965024	0.794652
BraA07g005830.3C	0.860163	0.767673
BraA07g005850.3C	0.967556	0.872528
BraA07g008690.3C	0.928567	0.819461
BraA07g008760.3C	0.734483	0.56662
BraA07g014330.3C	0.871409	0.829836
BraA07g015020.3C	0.908811	0.692393
BraA07g015310.3C	0.732417	0.509496
BraA07g016080.3C	0.910708	0.850631
BraA07g016460.3C	0.791427	0.681048
BraA07g017100.3C	0.905595	0.836265
BraA07g020920.3C	0.900136	0.814025
BraA07g023520.3C	0.694415	0.583128
BraA07g025200.3C	0.32979	0.0852135
BraA07g026280.3C	0.682202	0.454884
BraA07g026750.3C	0.9474	0.851854
BraA07g028010.3C	0.788166	0.596662
BraA07g028570.3C	0.731535	0.715794
BraA07g028580.3C	0.631356	0.688346
BraA07g029030.3C	0.933382	0.867009
BraA07g030210.3C	0.864795	0.856319
BraA07g030220.3C	0.469552	0.24588
BraA07g030330.3C	0.805479	0.95737
BraA07g032520.3C	0.804115	0.601219
BraA07g033440.3C	0.861976	0.689631
BraA07g033810.3C	0.906796	0.76946
BraA07g034350.3C	0.82047	0.637382
BraA07g034380.3C	0.825366	0.777376
BraA07g034640.3C	0.571856	0.43553
BraA07g034650.3C	0.407557	0.291711
BraA07g034750.3C	0.626237	0.653943
BraA07g035060.3C	0.799189	0.556506
BraA07g035070.3C	0.924289	0.876549
BraA07g035310.3C	0.556786	0.398929
BraA07g035390.3C	0.751223	0.58749
BraA07g035620.3C	0.624722	0.410021
BraA07g037460.3C	0.674586	0.584446
BraA07g037740.3C	0.84484	0.814753
BraA07g038760.3C	0.757145	0.861694
BraA07g038770.3C	0.713752	0.584674
BraA07g039300.3C	0.814509	0.789744
BraA07g039990.3C	0.465429	0.421458
BraA07g040000.3C	0.554345	0.393313
BraA07g040060.3C	0.777351	0.640076
BraA07g040450.3C	0.926168	0.942944
BraA07g040610.3C	0.881065	0.93246
BraA07g040770.3C	0.829121	0.662399
BraA07g041210.3C	0.645506	0.484476
BraA07g041220.3C	0.727075	0.528412
BraA08g000400.3C	0.856255	0.604944
BraA08g001100.3C	0.816906	0.619419
BraA08g002630.3C	0.918285	0.819137
BraA08g003930.3C	0.775194	0.843039
BraA08g004690.3C	0.87319	0.754699
BraA08g005200.3C	0.0884471	0.0191963
BraA08g005360.3C	0.781228	0.698138
BraA08g006480.3C	0.723214	0.614136
BraA08g008630.3C	0.634723	0.391032
BraA08g009120.3C	0.881353	0.920866
BraA08g009630.3C	0.765327	0.619535
BraA08g011210.3C	0.853463	0.765237
BraA08g011570.3C	0.813822	0.705868
BraA08g012230.3C	0.705612	0.560971
BraA08g012800.3C	0.80977	0.757356
BraA08g013430.3C	0.188531	0.0769392
BraA08g013590.3C	0.828964	0.743177
BraA08g013990.3C	0.868495	0.837337
BraA08g014070.3C	0.539584	0.361244
BraA08g015660.3C	0.425853	0.185285
BraA08g016770.3C	0.395228	0.137893
BraA08g017780.3C	0.773154	0.613841
BraA08g017930.3C	0.640912	0.556973
BraA08g018110.3C	0.508309	0.333401
BraA08g018180.3C	0.419485	0.258064
BraA08g018600.3C	0.889699	0.902082
BraA08g018620.3C	0.600532	0.355291
BraA08g019400.3C	0.638243	0.357833
BraA08g021310.3C	0.841064	0.707841
BraA08g021990.3C	0.45435	0.328125
BraA08g022030.3C	0.720392	0.562416
BraA08g022190.3C	0.813644	0.90406
BraA08g022630.3C	0.787044	0.722285
BraA08g023370.3C	0.812648	0.635747
BraA08g024480.3C	0.826776	0.739099
BraA08g025770.3C	0.43856	0.200931
BraA08g026080.3C	0.880111	0.738392
BraA08g026370.3C	0.768781	0.656274
BraA08g026430.3C	0.909008	0.926993
BraA08g026910.3C	0.340999	0.556037
BraA08g027460.3C	0.810703	0.879402
BraA08g027700.3C	0.942988	0.849935
BraA08g029030.3C	0.697895	0.362489
BraA08g029090.3C	0.899783	0.849369
BraA08g029150.3C	0.918472	0.772659
BraA08g035740.3C	0.807692	0.7754
BraA09g005790.3C	0.252726	0.0487476
BraA09g008290.3C	0.696549	0.533
BraA09g009920.3C	0.953159	0.928646
BraA09g011710.3C	0.261928	0.0919614
BraA09g011820.3C	0.86067	0.767651
BraA09g013860.3C	0.861616	0.820379
BraA09g014160.3C	0.267026	0.178977
BraA09g015410.3C	0.406258	0.248248
BraA09g015600.3C	0.460566	0.584415
BraA09g018490.3C	0.573844	0.368153
BraA09g018900.3C	0.826327	0.570244
BraA09g018990.3C	0.861004	0.719672
BraA09g019180.3C	0.602022	0.386988
BraA09g020890.3C	0.897065	0.811986
BraA09g022040.3C	0.468581	0.382047
BraA09g022780.3C	0.875304	0.715303
BraA09g026260.3C	0.629182	0.431494
BraA09g026350.3C	0.845938	0.669724
BraA09g026490.3C	0.189807	0.0551873
BraA09g026670.3C	0.940346	0.89627
BraA09g034950.3C	0.690714	0.457016
BraA09g035200.3C	0.623889	0.505134
BraA09g035720.3C	0.95295	0.902063
BraA09g036590.3C	0.216835	0.212958
BraA09g036940.3C	0.905649	0.959186
BraA09g038410.3C	0.438922	0.386756
BraA09g038840.3C	0.636957	0.435078
BraA09g039400.3C	0.56454	0.266628
BraA09g040000.3C	0.734021	0.840116
BraA09g040080.3C	0.765972	0.629188
BraA09g040550.3C	0.9137	0.828204
BraA09g041450.3C	0.70784	0.619532
BraA09g041740.3C	0.832522	0.659183
BraA09g041780.3C	0.690609	0.572155
BraA09g042280.3C	0.393706	0.350237
BraA09g042690.3C	0.933006	0.896311
BraA09g042960.3C	0.406329	0.359546
BraA09g043400.3C	0.898542	0.864837
BraA09g043520.3C	0.416447	0.261532
BraA09g043740.3C	0.901803	0.871945
BraA09g044140.3C	0.936834	0.802283
BraA09g044220.3C	0.519113	0.428453
BraA09g044380.3C	0.849021	0.864136
BraA09g046760.3C	0.829389	0.774211
BraA09g047720.3C	0.855154	0.747067
BraA09g047810.3C	0.811722	0.674768
BraA09g048100.3C	0.861217	0.972997
BraA09g049210.3C	0.893467	0.805023
BraA09g051290.3C	0.931418	0.898658
BraA09g051620.3C	0.63808	0.553822
BraA09g053260.3C	0.892108	0.813757
BraA09g054450.3C	0.450581	0.359335
BraA09g054670.3C	0.757852	0.777288
BraA09g055180.3C	0.456146	0.440118
BraA09g055240.3C	0.91336	0.9643
BraA09g055250.3C	0.643717	0.450936
BraA09g055670.3C	0.877478	0.759515
BraA09g055750.3C	0.853403	0.824717
BraA09g056110.3C	0.780998	0.709005
BraA09g056420.3C	0.185922	0.0714012
BraA09g057250.3C	0.769222	0.624786
BraA09g057400.3C	0.888172	0.775187
BraA09g057450.3C	0.688461	0.617441
BraA09g057480.3C	0.476653	0.34517
BraA09g057500.3C	0.495448	0.310677
BraA09g058160.3C	0.83185	0.715721
BraA09g058210.3C	0.476904	0.409412
BraA09g058400.3C	0.891524	0.911124
BraA09g058920.3C	0.84863	0.609892
BraA09g059190.3C	0.842664	0.836544
BraA09g059500.3C	0.560822	0.347082
BraA09g059790.3C	0.424514	0.298639
BraA09g060030.3C	0.787806	0.569671
BraA09g060200.3C	0.744802	0.608396
BraA09g061030.3C	0.895617	0.9522
BraA09g064670.3C	0.511317	0.32391
BraA09g065310.3C	0.70365	0.565536
BraA09g065580.3C	0.569358	0.361052
BraA09g065750.3C	0.77556	0.783334
BraA10g000820.3C	0.642488	0.522915
BraA10g001790.3C	0.897918	0.833683
BraA10g005030.3C	0.501233	0.431738
BraA10g009420.3C	0.353935	0.1951
BraA10g012850.3C	0.833871	0.8592
BraA10g017800.3C	0.822201	0.663919
BraA10g018690.3C	0.895225	0.752052
BraA10g019870.3C	0.862325	0.675215
BraA10g022220.3C	0.833124	0.778392
BraA10g023620.3C	0.743706	0.476206
BraA10g023740.3C	0.953973	0.959439
BraA10g024230.3C	0.97562	0.88004
BraA10g024470.3C	0.947206	0.845183
BraA10g026610.3C	0.476107	0.513613
BraA10g026970.3C	0.642117	0.531495
BraA10g028820.3C	0.840031	0.690106
BraA10g029200.3C	0.75597	0.792979
BraA10g029790.3C	0.529514	0.449108
BraA10g031840.3C	0.689354	0.563206
BraA10g031910.3C	0.656829	0.483204
BraA10g033680.3C	0.557127	0.296438
BraAnng005460.3C	0.49261	0.260311
	0.676756	0.421644
	0.533633	0.371663
	0.665017	0.582448
	0.757997	0.592304
	0.87858	0.784547
	0.62322	0.408295
	0.437843	0.334364
	0.608678	0.65097
	0.7179	0.540815
	0.91578	0.892395
	0.400687	0.620052
	0.686707	0.807771
	0.836991	0.712661
	0.423303	0.40646
	0.540467	0.469023
	0.451617	0.256114
	0.830216	0.777497
	0.827975	0.706395
	0.611369	0.439413
	0.900223	0.708783
	0.663829	0.600439
	0.147784	0.00941768
	0.89626	0.859286
	0.838213	0.727571
	0.675669	0.782829
	0.905465	0.84983
	0.717421	0.629933
	0.837621	0.797015
	0.942209	0.93129
	0.926719	0.882738
	0.921299	0.944856
	0.792491	0.635552
	0.922923	0.916876
	0.825569	0.66658
	0.769423	0.783705

## Sheet: darkgrey
Table S5 The module membership and gene significance of genes in darkgrey module of WGCNA.
GeneID (758)	Module Membership	gene significance
BraA01g000660.3C	0.655638	0.948233
BraA01g001500.3C	0.854417	0.630616
BraA01g001700.3C	0.715605	0.867741
BraA01g001740.3C	0.720192	0.375317
BraA01g001790.3C	0.756481	0.366305
BraA01g002220.3C	0.797147	0.787532
BraA01g003450.3C	0.783173	0.249674
BraA01g003600.3C	0.905661	0.389285
BraA01g003710.3C	0.72083	0.182486
BraA01g004410.3C	0.753212	0.345685
BraA01g004970.3C	0.595785	0.738266
BraA01g005430.3C	0.820597	0.257743
BraA01g007190.3C	0.495991	0.199413
BraA01g007420.3C	0.929648	0.507733
BraA01g008460.3C	0.82418	0.827937
BraA01g008570.3C	0.448966	0.24569
BraA01g010700.3C	0.58794	0.238693
BraA01g010990.3C	0.621038	0.112727
BraA01g011660.3C	0.801397	0.653017
BraA01g012100.3C	0.527545	0.419046
BraA01g012700.3C	0.459191	0.611378
BraA01g013540.3C	0.617316	0.933987
BraA01g014280.3C	0.669783	0.46848
BraA01g014390.3C	0.801287	0.429299
BraA01g014680.3C	0.946311	0.669482
BraA01g016770.3C	0.802334	0.533148
BraA01g017050.3C	0.362423	0.0343204
BraA01g017520.3C	0.634217	0.304451
BraA01g018030.3C	0.56997	0.0049224
BraA01g019290.3C	0.807666	0.248336
BraA01g020550.3C	0.582412	0.358299
BraA01g020750.3C	0.690097	0.804166
BraA01g022120.3C	0.550906	0.85837
BraA01g024750.3C	0.561353	0.663485
BraA01g024870.3C	0.671562	0.946171
BraA01g025500.3C	0.850229	0.715779
BraA01g025640.3C	0.78241	0.829093
BraA01g025720.3C	0.685207	0.280053
BraA01g026140.3C	0.753626	0.75857
BraA01g027860.3C	0.443623	0.352333
BraA01g028460.3C	0.786046	0.31499
BraA01g028870.3C	0.771826	0.669611
BraA01g028880.3C	0.81698	0.543093
BraA01g028890.3C	0.69878	0.465551
BraA01g028900.3C	0.754292	0.720379
BraA01g028910.3C	0.729327	0.517336
BraA01g028930.3C	0.830003	0.608315
BraA01g028940.3C	0.682781	0.618918
BraA01g029880.3C	0.694541	0.493394
BraA01g030550.3C	0.799739	0.258986
BraA01g032000.3C	0.698597	0.109061
BraA01g032020.3C	0.566711	0.206323
BraA01g032150.3C	0.831106	0.771316
BraA01g033080.3C	0.635665	0.995382
BraA01g035840.3C	0.672814	0.0710514
BraA01g035950.3C	0.606771	0.646578
BraA01g036190.3C	0.634804	0.0985745
BraA01g037030.3C	0.374462	0.0586977
BraA01g037520.3C	0.490168	0.532337
BraA01g037950.3C	0.528894	0.106383
BraA01g038780.3C	0.901742	0.775779
BraA01g039290.3C	0.600665	0.468221
BraA01g039300.3C	0.74558	0.175099
BraA01g039560.3C	0.686377	0.102736
BraA01g043310.3C	0.62009	0.208983
BraA01g043400.3C	0.564563	0.805999
BraA01g043640.3C	0.403771	0.265497
BraA01g044090.3C	0.657768	0.254215
BraA01g044650.3C	0.940147	0.547068
BraA01g044820.3C	0.564715	0.0160955
BraA02g000380.3C	0.803101	0.187864
BraA02g000450.3C	0.858196	0.681256
BraA02g000800.3C	0.795751	0.701379
BraA02g001760.3C	0.719935	0.44007
BraA02g002180.3C	0.933294	0.76347
BraA02g002200.3C	0.64232	0.323605
BraA02g002640.3C	0.682612	0.364132
BraA02g002850.3C	0.71085	0.382068
BraA02g003330.3C	0.771041	0.323287
BraA02g003370.3C	0.783719	0.711123
BraA02g003380.3C	0.63078	0.839202
BraA02g003600.3C	0.636521	0.483067
BraA02g003840.3C	0.477598	0.00831895
BraA02g004420.3C	0.692133	0.377855
BraA02g005320.3C	0.851627	0.633294
BraA02g005370.3C	0.723463	0.26238
BraA02g005900.3C	0.795116	0.563643
BraA02g005910.3C	0.713031	0.41059
BraA02g006730.3C	0.878034	0.475893
BraA02g007250.3C	0.945253	0.488101
BraA02g007270.3C	0.706946	0.60684
BraA02g007330.3C	0.806431	0.338984
BraA02g008220.3C	0.860829	0.881252
BraA02g008880.3C	0.613531	0.771955
BraA02g009360.3C	0.654702	0.275955
BraA02g010230.3C	0.502333	0.0363906
BraA02g010820.3C	0.823425	0.307434
BraA02g010830.3C	0.875838	0.476828
BraA02g010840.3C	0.644911	0.614002
BraA02g010970.3C	0.874568	0.261283
BraA02g010990.3C	0.805709	0.69294
BraA02g011670.3C	0.718667	0.447963
BraA02g011780.3C	0.865176	0.320956
BraA02g011900.3C	0.660252	0.217546
BraA02g012090.3C	0.66844	0.63297
BraA02g012130.3C	0.884795	0.670494
BraA02g013680.3C	0.885054	0.742751
BraA02g013950.3C	0.866076	0.48846
BraA02g015180.3C	0.747981	0.427014
BraA02g015390.3C	0.783342	0.669495
BraA02g015880.3C	0.455692	0.692333
BraA02g015930.3C	0.734526	0.2887
BraA02g016160.3C	0.746401	0.956347
BraA02g016970.3C	0.813565	0.320326
BraA02g017600.3C	0.898521	0.374159
BraA02g017800.3C	0.570223	0.678664
BraA02g018110.3C	0.742515	0.168275
BraA02g019130.3C	0.640905	0.231268
BraA02g019900.3C	0.570625	0.193075
BraA02g020040.3C	0.690335	0.534724
BraA02g020100.3C	0.353199	0.100725
BraA02g021160.3C	0.680079	0.587295
BraA02g021250.3C	0.731308	0.532027
BraA02g022310.3C	0.637656	0.399803
BraA02g022450.3C	0.601025	0.0393152
BraA02g022810.3C	0.682407	0.572343
BraA02g023570.3C	0.816772	0.590316
BraA02g023580.3C	0.589141	0.386015
BraA02g024080.3C	0.633071	0.244396
BraA02g024140.3C	0.956529	0.624736
BraA02g025180.3C	0.734871	0.314278
BraA02g025540.3C	0.667683	0.518593
BraA02g026020.3C	0.819972	0.551406
BraA02g026540.3C	0.597396	0.190643
BraA02g026780.3C	0.873066	0.820289
BraA02g026930.3C	0.68479	0.284953
BraA02g027090.3C	0.443744	0.163361
BraA02g027350.3C	0.895634	0.730154
BraA02g027790.3C	0.83368	0.265371
BraA02g027810.3C	0.622321	0.049965
BraA02g027930.3C	0.838703	0.543857
BraA02g028430.3C	0.797783	0.763831
BraA02g028790.3C	0.769566	0.111357
BraA02g030600.3C	0.643871	0.0894699
BraA02g031000.3C	0.902872	0.597154
BraA02g031230.3C	0.840569	0.684531
BraA02g031300.3C	0.853733	0.525698
BraA02g034850.3C	0.882697	0.472225
BraA02g035380.3C	0.847657	0.635556
BraA02g036820.3C	0.902609	0.618596
BraA02g037150.3C	0.591362	0.283359
BraA02g037180.3C	0.728101	0.735877
BraA02g037480.3C	0.920446	0.854468
BraA02g037640.3C	0.747629	0.732457
BraA02g037940.3C	0.656799	0.892223
BraA02g039510.3C	0.703786	0.611621
BraA02g039880.3C	0.635755	0.851293
BraA02g040450.3C	0.652022	0.00096953
BraA02g041240.3C	0.561295	0.603742
BraA02g041250.3C	0.586956	0.541027
BraA02g041510.3C	0.761572	0.249694
BraA02g042000.3C	0.402392	0.517008
BraA02g042310.3C	0.869566	0.824103
BraA02g042340.3C	0.902892	0.466825
BraA02g043050.3C	0.873684	0.42039
BraA02g043250.3C	0.66213	0.402661
BraA02g044190.3C	0.817834	0.57852
BraA03g000600.3C	0.873272	0.771688
BraA03g001630.3C	0.659946	0.512982
BraA03g002070.3C	0.365009	0.00265249
BraA03g002470.3C	0.801878	0.231035
BraA03g002560.3C	0.744447	0.199098
BraA03g003000.3C	0.307679	0.518141
BraA03g003010.3C	0.387678	0.504525
BraA03g003120.3C	0.844776	0.521837
BraA03g003830.3C	0.798101	0.780337
BraA03g004140.3C	0.860686	0.546272
BraA03g006180.3C	0.681942	0.589539
BraA03g006240.3C	0.873552	0.273633
BraA03g006670.3C	0.803366	0.266813
BraA03g007390.3C	0.547173	0.609302
BraA03g008170.3C	0.954642	0.622092
BraA03g009000.3C	0.748307	0.359375
BraA03g009390.3C	0.703934	0.232443
BraA03g010180.3C	0.704352	0.796177
BraA03g010640.3C	0.959071	0.551274
BraA03g010690.3C	0.715374	0.318876
BraA03g010760.3C	0.405709	0.00608189
BraA03g010770.3C	0.446436	0.0826563
BraA03g011700.3C	0.586984	0.173547
BraA03g012330.3C	0.739896	0.417589
BraA03g013150.3C	0.624701	0.806874
BraA03g014880.3C	0.867525	0.591683
BraA03g014910.3C	0.881325	0.713699
BraA03g015690.3C	0.925118	0.523915
BraA03g018790.3C	0.445698	0.12803
BraA03g018860.3C	0.73105	0.227326
BraA03g019230.3C	0.517823	0.609045
BraA03g019520.3C	0.789821	0.871919
BraA03g020020.3C	0.279952	0.446166
BraA03g020650.3C	0.931089	0.610685
BraA03g020750.3C	0.691803	0.166472
BraA03g020890.3C	0.782601	0.201625
BraA03g021850.3C	0.721247	0.71297
BraA03g022160.3C	0.929512	0.49637
BraA03g022200.3C	0.666714	0.0468729
BraA03g024160.3C	0.601544	0.48258
BraA03g026440.3C	0.730766	0.823515
BraA03g027250.3C	0.61796	0.190848
BraA03g027620.3C	0.7535	0.128365
BraA03g027680.3C	0.716123	0.265669
BraA03g027780.3C	0.794097	0.406451
BraA03g027950.3C	0.950378	0.630241
BraA03g027960.3C	0.952306	0.526519
BraA03g028240.3C	0.688539	0.212603
BraA03g028320.3C	0.46282	0.590946
BraA03g028460.3C	0.931158	0.471435
BraA03g028740.3C	0.681744	0.976302
BraA03g029330.3C	0.733563	0.192146
BraA03g029580.3C	0.905546	0.534414
BraA03g029970.3C	0.524506	0.267705
BraA03g030090.3C	0.561107	0.192238
BraA03g030570.3C	0.427324	0.0841219
BraA03g031370.3C	0.937066	0.505358
BraA03g032270.3C	0.737862	0.737658
BraA03g032350.3C	0.614616	0.382426
BraA03g032430.3C	0.655609	0.347288
BraA03g033160.3C	0.716608	0.0804565
BraA03g033950.3C	0.57732	0.547066
BraA03g034810.3C	0.797105	0.838113
BraA03g034860.3C	0.747263	0.204662
BraA03g035130.3C	0.743955	0.530781
BraA03g035350.3C	0.661346	0.277859
BraA03g036720.3C	0.793671	0.59011
BraA03g036760.3C	0.835857	0.400816
BraA03g036920.3C	0.654274	0.75835
BraA03g037360.3C	0.702398	0.483551
BraA03g037440.3C	0.908196	0.492413
BraA03g037460.3C	0.616321	0.732915
BraA03g038660.3C	0.702387	0.641092
BraA03g039020.3C	0.875382	0.850176
BraA03g039320.3C	0.836763	0.275584
BraA03g039430.3C	0.659943	0.725488
BraA03g039650.3C	0.909716	0.603208
BraA03g039750.3C	0.741203	0.230127
BraA03g040580.3C	0.412969	0.133382
BraA03g040590.3C	0.48769	0.459533
BraA03g041190.3C	0.930106	0.703283
BraA03g041500.3C	0.438156	0.163225
BraA03g041660.3C	0.80869	0.494888
BraA03g041960.3C	0.465305	0.0831632
BraA03g042430.3C	0.643311	0.219873
BraA03g043100.3C	0.854959	0.653589
BraA03g043730.3C	0.820983	0.905534
BraA03g044120.3C	0.763751	0.791822
BraA03g045050.3C	0.783827	0.225545
BraA03g045540.3C	0.510782	0.00131499
BraA03g046310.3C	0.514466	0.257449
BraA03g046630.3C	0.466178	0.0686167
BraA03g047250.3C	0.4815	0.0622123
BraA03g047330.3C	0.583396	0.490295
BraA03g047370.3C	0.547069	0.956118
BraA03g048030.3C	0.379375	0.0102236
BraA03g049870.3C	0.815233	0.574568
BraA03g051030.3C	0.8146	0.733033
BraA03g051170.3C	0.874575	0.274224
BraA03g051190.3C	0.864991	0.300472
BraA03g051200.3C	0.866732	0.275964
BraA03g051720.3C	0.631151	0.238764
BraA03g052760.3C	0.809513	0.470511
BraA03g052860.3C	0.848598	0.592991
BraA03g053250.3C	0.803482	0.297077
BraA03g053410.3C	0.650505	0.301973
BraA03g053860.3C	0.703353	0.0202096
BraA03g055510.3C	0.939795	0.60626
BraA03g055530.3C	0.899961	0.467929
BraA03g055660.3C	0.792204	0.438172
BraA03g056190.3C	0.560559	0.37397
BraA03g057080.3C	0.720065	0.57854
BraA03g058090.3C	0.3947	0.243014
BraA03g058720.3C	0.912101	0.610215
BraA03g058950.3C	0.501852	0.794145
BraA03g059230.3C	0.88311	0.706584
BraA03g059910.3C	0.943778	0.672314
BraA03g060090.3C	0.783877	0.419029
BraA03g060410.3C	0.867427	0.416286
BraA03g060440.3C	0.43162	0.101472
BraA03g060480.3C	0.734658	0.374191
BraA03g060970.3C	0.617299	0.544651
BraA03g064230.3C	0.348184	0.440387
BraA04g000400.3C	0.457242	0.341788
BraA04g001080.3C	0.813436	0.754026
BraA04g001140.3C	0.658241	0.959752
BraA04g001820.3C	0.788253	0.843285
BraA04g002900.3C	0.655629	0.27171
BraA04g003550.3C	0.888789	0.577266
BraA04g004030.3C	0.62154	0.189875
BraA04g004040.3C	0.918366	0.586717
BraA04g004140.3C	0.67473	0.588377
BraA04g004850.3C	0.734968	0.273467
BraA04g005810.3C	0.898788	0.814527
BraA04g006520.3C	0.865746	0.860081
BraA04g006530.3C	0.927469	0.720609
BraA04g008080.3C	0.902712	0.51307
BraA04g008320.3C	0.867429	0.704656
BraA04g008530.3C	0.831647	0.608459
BraA04g010460.3C	0.901817	0.658421
BraA04g012490.3C	0.657778	0.445264
BraA04g014390.3C	0.816889	0.837697
BraA04g015280.3C	0.549374	0.377521
BraA04g015300.3C	0.69377	0.711246
BraA04g015840.3C	0.502907	0.701267
BraA04g015980.3C	0.773635	0.175992
BraA04g016480.3C	0.7115	0.507727
BraA04g016680.3C	0.698379	0.185566
BraA04g016700.3C	0.781637	0.683401
BraA04g016820.3C	0.571589	0.154027
BraA04g016940.3C	0.923199	0.382607
BraA04g018980.3C	0.974972	0.571293
BraA04g019720.3C	0.852211	0.440354
BraA04g020180.3C	0.535131	0.0725732
BraA04g020390.3C	0.586787	0.337419
BraA04g021510.3C	0.904656	0.514266
BraA04g022490.3C	0.669779	0.386277
BraA04g023340.3C	0.726116	0.818925
BraA04g024120.3C	0.819849	0.481001
BraA04g024580.3C	0.65892	0.149798
BraA04g024880.3C	0.737173	0.379753
BraA04g025720.3C	0.835054	0.41775
BraA04g025890.3C	0.768178	0.288007
BraA04g026140.3C	0.729624	0.200629
BraA04g026690.3C	0.861735	0.534812
BraA04g027240.3C	0.789679	0.250939
BraA04g027540.3C	0.740778	0.691449
BraA04g027870.3C	0.622542	0.308244
BraA04g029710.3C	0.698214	0.936281
BraA04g029990.3C	0.707172	0.871137
BraA04g030920.3C	0.518567	0.697689
BraA04g031230.3C	0.519157	0.0373731
BraA04g031400.3C	0.864271	0.826884
BraA04g031870.3C	0.859468	0.350441
BraA04g032570.3C	0.597431	0.244759
BraA05g000550.3C	0.546395	0.126498
BraA05g000570.3C	0.830748	0.478821
BraA05g001020.3C	0.952984	0.669807
BraA05g001290.3C	0.918965	0.624574
BraA05g001810.3C	0.737818	0.127146
BraA05g002480.3C	0.845448	0.890722
BraA05g002630.3C	0.721578	0.239627
BraA05g003030.3C	0.83439	0.779855
BraA05g003390.3C	0.896064	0.651214
BraA05g003880.3C	0.917151	0.681835
BraA05g004170.3C	0.903286	0.560733
BraA05g004210.3C	0.804789	0.33465
BraA05g004280.3C	0.450242	0.125555
BraA05g004720.3C	0.832852	0.753175
BraA05g004870.3C	0.446834	0.859563
BraA05g005140.3C	0.605408	0.203012
BraA05g005450.3C	0.76949	0.712923
BraA05g006050.3C	0.42289	0.137539
BraA05g006570.3C	0.83748	0.263908
BraA05g006590.3C	0.700296	0.615436
BraA05g006640.3C	0.710813	0.733966
BraA05g007550.3C	0.311823	0.338713
BraA05g007720.3C	0.561285	0.0672294
BraA05g007770.3C	0.757894	0.220759
BraA05g008070.3C	0.40573	0.0489553
BraA05g008270.3C	0.713392	0.12903
BraA05g009140.3C	0.412623	0.362538
BraA05g009280.3C	0.771955	0.367591
BraA05g010160.3C	0.815398	0.358465
BraA05g010260.3C	0.543051	0.690037
BraA05g010760.3C	0.75701	0.155096
BraA05g011380.3C	0.726053	0.231195
BraA05g011390.3C	0.452687	0.171359
BraA05g015010.3C	0.56893	0.864029
BraA05g016560.3C	0.785003	0.338853
BraA05g016580.3C	0.631937	0.275023
BraA05g016770.3C	0.7343	0.518145
BraA05g016800.3C	0.798949	0.455295
BraA05g018020.3C	0.817745	0.32679
BraA05g019990.3C	0.879118	0.55055
BraA05g020720.3C	0.793259	0.170427
BraA05g023200.3C	0.770459	0.80416
BraA05g025370.3C	0.819988	0.524355
BraA05g026230.3C	0.552017	0.33961
BraA05g026780.3C	0.740702	0.297012
BraA05g027600.3C	0.832153	0.902591
BraA05g027840.3C	0.849424	0.881086
BraA05g027950.3C	0.944468	0.635874
BraA05g029550.3C	0.639073	0.411586
BraA05g030730.3C	0.852651	0.219854
BraA05g030850.3C	0.576132	0.901699
BraA05g031510.3C	0.687826	0.0869673
BraA05g031730.3C	0.736383	0.747656
BraA05g032820.3C	0.867286	0.835108
BraA05g033230.3C	0.611582	0.217102
BraA05g033360.3C	0.535234	0.114236
BraA05g035300.3C	0.54931	0.00891321
BraA05g035360.3C	0.594704	0.276976
BraA05g035410.3C	0.72141	0.883241
BraA05g035520.3C	0.540124	0.631147
BraA05g036680.3C	0.794754	0.298827
BraA05g037140.3C	0.791219	0.466275
BraA05g037150.3C	0.570992	0.376239
BraA05g037830.3C	0.916166	0.492939
BraA05g038390.3C	0.696213	0.235456
BraA05g040790.3C	0.931088	0.724865
BraA05g040810.3C	0.927199	0.583067
BraA05g040990.3C	0.840562	0.60079
BraA05g041270.3C	0.850307	0.727422
BraA06g000990.3C	0.58157	0.158654
BraA06g001040.3C	0.802777	0.633301
BraA06g001070.3C	0.771503	0.553509
BraA06g001760.3C	0.954104	0.656923
BraA06g001780.3C	0.938453	0.722281
BraA06g001790.3C	0.883304	0.468691
BraA06g001840.3C	0.835002	0.490138
BraA06g001890.3C	0.906489	0.644776
BraA06g004090.3C	0.94865	0.620356
BraA06g004170.3C	0.668551	0.351394
BraA06g005150.3C	0.570794	0.406563
BraA06g005350.3C	0.938369	0.509503
BraA06g005930.3C	0.867255	0.915075
BraA06g006420.3C	0.829033	0.543768
BraA06g006440.3C	0.816907	0.156043
BraA06g006840.3C	0.726894	0.530449
BraA06g007200.3C	0.599464	0.46765
BraA06g009030.3C	0.475058	0.029582
BraA06g009120.3C	0.781085	0.422168
BraA06g011110.3C	0.813774	0.708706
BraA06g011250.3C	0.895218	0.631325
BraA06g011580.3C	0.342311	0.732995
BraA06g011590.3C	0.962267	0.742005
BraA06g012350.3C	0.85331	0.616714
BraA06g015130.3C	0.531047	0.36036
BraA06g015260.3C	0.696258	0.921669
BraA06g016010.3C	0.756827	0.55662
BraA06g016800.3C	0.822611	0.555885
BraA06g016830.3C	0.36328	0.031964
BraA06g016910.3C	0.869671	0.704217
BraA06g017590.3C	0.403499	0.552555
BraA06g018620.3C	0.775049	0.517581
BraA06g019210.3C	0.524211	0.65964
BraA06g019540.3C	0.493473	0.769668
BraA06g020010.3C	0.751797	0.0611062
BraA06g020020.3C	0.772674	0.463392
BraA06g020830.3C	0.656039	0.0221376
BraA06g021220.3C	0.76608	0.625103
BraA06g022640.3C	0.683226	0.179746
BraA06g023330.3C	0.618123	0.86763
BraA06g023410.3C	0.669846	0.728724
BraA06g026480.3C	0.563082	0.447048
BraA06g027240.3C	0.825203	0.337023
BraA06g028320.3C	0.7111	0.574508
BraA06g028550.3C	0.627175	0.353685
BraA06g030770.3C	0.577598	0.949636
BraA06g031960.3C	0.534366	0.751888
BraA06g032880.3C	0.529559	0.771155
BraA06g033420.3C	0.663513	0.124457
BraA06g036060.3C	0.629049	0.806013
BraA06g036210.3C	0.696872	0.409183
BraA06g037140.3C	0.937211	0.660178
BraA06g037790.3C	0.674032	0.63545
BraA06g037830.3C	0.964955	0.620499
BraA06g039510.3C	0.868003	0.402984
BraA06g040720.3C	0.436904	0.382502
BraA06g041110.3C	0.736202	0.410058
BraA06g041490.3C	0.619305	0.0873388
BraA06g041720.3C	0.537392	0.020039
BraA06g041840.3C	0.667774	0.572831
BraA06g043630.3C	0.869699	0.744555
BraA06g044700.3C	0.651004	0.0170387
BraA06g044750.3C	0.347617	0.458149
BraA07g000290.3C	0.829732	0.685167
BraA07g001810.3C	0.66206	0.608934
BraA07g002010.3C	0.711949	0.116142
BraA07g003300.3C	0.792783	0.730328
BraA07g004000.3C	0.811341	0.443381
BraA07g004020.3C	0.756692	0.900325
BraA07g004380.3C	0.555416	0.539425
BraA07g004440.3C	0.900926	0.324355
BraA07g005130.3C	0.581526	0.459037
BraA07g005240.3C	0.649972	0.526702
BraA07g005440.3C	0.939396	0.756969
BraA07g008330.3C	0.861924	0.500649
BraA07g008560.3C	0.883782	0.600981
BraA07g008570.3C	0.542237	0.00398313
BraA07g008780.3C	0.822385	0.261015
BraA07g009310.3C	0.831767	0.354286
BraA07g010300.3C	0.796231	0.58417
BraA07g010910.3C	0.892728	0.820812
BraA07g012100.3C	0.12554	0.196912
BraA07g013230.3C	0.799264	0.673071
BraA07g014710.3C	0.426713	0.38813
BraA07g015290.3C	0.709467	0.193323
BraA07g015520.3C	0.761221	0.753979
BraA07g015800.3C	0.876694	0.531983
BraA07g017760.3C	0.72205	0.460417
BraA07g018130.3C	0.846696	0.701212
BraA07g018690.3C	0.14474	0.151067
BraA07g018830.3C	0.638706	0.769252
BraA07g019000.3C	0.796519	0.304357
BraA07g020000.3C	0.525799	0.0797813
BraA07g020880.3C	0.576533	0.374474
BraA07g021270.3C	0.848492	0.87856
BraA07g021550.3C	0.805359	0.50184
BraA07g021800.3C	0.852285	0.752878
BraA07g021870.3C	0.671882	0.88655
BraA07g022320.3C	0.586457	0.506434
BraA07g023860.3C	0.645885	0.127393
BraA07g025190.3C	0.74119	0.355258
BraA07g025710.3C	0.727116	0.209126
BraA07g026010.3C	0.540608	0.48969
BraA07g026240.3C	0.76437	0.380967
BraA07g026430.3C	0.767785	0.797917
BraA07g027400.3C	0.795204	0.400457
BraA07g027410.3C	0.882091	0.426507
BraA07g028030.3C	0.835759	0.544996
BraA07g028240.3C	0.746451	0.896783
BraA07g028640.3C	0.352531	0.00105999
BraA07g029220.3C	0.627226	0.00433626
BraA07g030190.3C	0.434009	0.599829
BraA07g031090.3C	0.625604	0.784676
BraA07g031860.3C	0.59054	0.715663
BraA07g032150.3C	0.434721	0.10934
BraA07g033280.3C	0.914179	0.880782
BraA07g033350.3C	0.737148	0.0745311
BraA07g033930.3C	0.813826	0.34633
BraA07g034060.3C	0.770796	0.459885
BraA07g034400.3C	0.491038	0.173637
BraA07g034410.3C	0.749423	0.863666
BraA07g034740.3C	0.714241	0.934953
BraA07g035230.3C	0.557818	0.518879
BraA07g035380.3C	0.657732	0.525449
BraA07g035420.3C	0.805015	0.802644
BraA07g036190.3C	0.710761	0.816184
BraA07g036350.3C	0.546363	0.721568
BraA07g037370.3C	0.724546	0.423632
BraA07g038520.3C	0.828956	0.222882
BraA07g038640.3C	0.566869	0.662508
BraA07g039050.3C	0.805623	0.641632
BraA07g039240.3C	0.537181	0.0582121
BraA07g039280.3C	0.675464	0.436485
BraA07g039450.3C	0.612756	0.864346
BraA07g039710.3C	0.715265	0.247744
BraA07g040260.3C	0.654088	0.558115
BraA07g040870.3C	0.789103	0.467577
BraA07g041400.3C	0.662444	0.23291
BraA07g041520.3C	0.713239	0.930993
BraA07g041840.3C	0.948137	0.713083
BraA07g042030.3C	0.701355	0.770448
BraA07g042280.3C	0.914234	0.729336
BraA07g042600.3C	0.536015	0.161541
BraA08g001270.3C	0.649896	0.189515
BraA08g003790.3C	0.723768	0.816665
BraA08g004040.3C	0.635213	0.00926557
BraA08g004210.3C	0.685029	0.61011
BraA08g005150.3C	0.51661	0.00473272
BraA08g005780.3C	0.953724	0.745268
BraA08g006420.3C	0.716177	0.321328
BraA08g007700.3C	0.629744	0.743792
BraA08g007890.3C	0.728726	0.407573
BraA08g009150.3C	0.926817	0.793042
BraA08g010160.3C	0.764052	0.311921
BraA08g010420.3C	0.804131	0.194591
BraA08g010620.3C	0.467011	0.0160592
BraA08g010880.3C	0.593738	0.575947
BraA08g011360.3C	0.537341	0.125977
BraA08g011820.3C	0.617516	0.00229911
BraA08g012370.3C	0.694936	0.333089
BraA08g013210.3C	0.861993	0.806769
BraA08g013270.3C	0.689423	0.456187
BraA08g015460.3C	0.725983	0.0584361
BraA08g015860.3C	0.727768	0.420604
BraA08g016570.3C	0.519416	0.767374
BraA08g018120.3C	0.87912	0.537512
BraA08g018130.3C	0.88311	0.518428
BraA08g020100.3C	0.734756	0.37734
BraA08g020500.3C	0.770321	0.790279
BraA08g023800.3C	0.648827	0.0298909
BraA08g025060.3C	0.514452	0.801146
BraA08g025650.3C	0.915209	0.387318
BraA08g026460.3C	0.575237	0.688875
BraA08g027620.3C	0.810751	0.676842
BraA08g028120.3C	0.723931	0.83497
BraA08g028260.3C	0.360431	0.521357
BraA08g029250.3C	0.720993	0.0836186
BraA08g029880.3C	0.675523	0.344431
BraA08g030340.3C	0.84875	0.3794
BraA08g030860.3C	0.741847	0.591236
BraA08g030910.3C	0.38698	0.0143997
BraA08g031240.3C	0.604946	0.156119
BraA08g031840.3C	0.804903	0.734655
BraA08g033500.3C	0.734015	0.565875
BraA08g033520.3C	0.590061	0.0377415
BraA08g033530.3C	0.597302	0.104202
BraA08g034360.3C	0.811083	0.270589
BraA08g034380.3C	0.672968	0.349599
BraA08g034400.3C	0.72239	0.358177
BraA08g034620.3C	0.370973	0.583158
BraA09g000450.3C	0.855197	0.499412
BraA09g000700.3C	0.684712	0.714358
BraA09g001060.3C	0.867142	0.701321
BraA09g001290.3C	0.714516	0.859556
BraA09g003210.3C	0.844141	0.392229
BraA09g003320.3C	0.653223	0.542278
BraA09g003480.3C	0.741842	0.859166
BraA09g003950.3C	0.336907	0.308144
BraA09g004470.3C	0.858302	0.440128
BraA09g004720.3C	0.536698	0.401407
BraA09g004970.3C	0.665294	0.346794
BraA09g006260.3C	0.673693	0.173965
BraA09g006270.3C	0.719672	0.32015
BraA09g006280.3C	0.843235	0.62252
BraA09g006440.3C	0.786189	0.817718
BraA09g006980.3C	0.809616	0.935977
BraA09g007380.3C	0.737037	0.794001
BraA09g007390.3C	0.844188	0.328058
BraA09g008390.3C	0.807787	0.335453
BraA09g008730.3C	0.652683	0.395726
BraA09g008980.3C	0.773715	0.296031
BraA09g009450.3C	0.850714	0.924325
BraA09g009970.3C	0.901592	0.483928
BraA09g010120.3C	0.730443	0.267761
BraA09g010220.3C	0.660795	0.448912
BraA09g010770.3C	0.843994	0.612657
BraA09g011530.3C	0.518445	0.178485
BraA09g012770.3C	0.639819	0.291893
BraA09g012860.3C	0.816732	0.448548
BraA09g013250.3C	0.908042	0.480346
BraA09g013290.3C	0.87589	0.811206
BraA09g014900.3C	0.912005	0.491337
BraA09g014940.3C	0.688085	0.503351
BraA09g015360.3C	0.915965	0.663904
BraA09g015500.3C	0.7478	0.163653
BraA09g015550.3C	0.778744	0.162197
BraA09g015680.3C	0.833452	0.294148
BraA09g015730.3C	0.649547	0.0376938
BraA09g015980.3C	0.850634	0.540524
BraA09g016310.3C	0.795495	0.211944
BraA09g016770.3C	0.629215	0.59803
BraA09g016780.3C	0.722242	0.746813
BraA09g018060.3C	0.894207	0.377137
BraA09g019390.3C	0.445426	0.229554
BraA09g019770.3C	0.672948	0.00656986
BraA09g019940.3C	0.90266	0.476319
BraA09g020600.3C	0.958032	0.694334
BraA09g022390.3C	0.961481	0.545072
BraA09g022400.3C	0.907542	0.629618
BraA09g023180.3C	0.648386	0.525203
BraA09g024690.3C	0.836586	0.618309
BraA09g025000.3C	0.806717	0.212078
BraA09g025240.3C	0.625717	0.0749079
BraA09g025690.3C	0.322753	0.408252
BraA09g025880.3C	0.68439	0.0494654
BraA09g026950.3C	0.742098	0.78662
BraA09g027240.3C	0.932077	0.780945
BraA09g028870.3C	0.857988	0.830439
BraA09g029120.3C	0.927938	0.791593
BraA09g031470.3C	0.980559	0.670676
BraA09g032250.3C	0.624915	0.00216414
BraA09g032630.3C	0.200085	0.149896
BraA09g032690.3C	0.875338	0.836957
BraA09g033750.3C	0.830497	0.273655
BraA09g033970.3C	0.958071	0.506603
BraA09g033990.3C	0.760864	0.361708
BraA09g034800.3C	0.690726	0.536175
BraA09g036890.3C	0.693959	0.340494
BraA09g037400.3C	0.750139	0.643771
BraA09g037930.3C	0.815006	0.339033
BraA09g040640.3C	0.598165	0.0352968
BraA09g041650.3C	0.725617	0.0325625
BraA09g042350.3C	0.773692	0.488711
BraA09g042570.3C	0.971731	0.695122
BraA09g042580.3C	0.643659	0.120715
BraA09g042870.3C	0.886811	0.549478
BraA09g043900.3C	0.443051	0.198255
BraA09g045520.3C	0.650007	0.0832521
BraA09g049350.3C	0.803212	0.421386
BraA09g049600.3C	0.690932	0.87924
BraA09g050950.3C	0.863127	0.722582
BraA09g050970.3C	0.866128	0.354769
BraA09g053000.3C	0.913653	0.497628
BraA09g053390.3C	0.874024	0.358403
BraA09g054110.3C	0.717151	0.794553
BraA09g054560.3C	0.654387	0.0818529
BraA09g054580.3C	0.868387	0.446947
BraA09g054590.3C	0.694377	0.302207
BraA09g054650.3C	0.640063	0.593642
BraA09g057260.3C	0.791183	0.399637
BraA09g057750.3C	0.826919	0.747758
BraA09g059120.3C	0.66745	0.0362457
BraA09g059530.3C	0.375684	0.222036
BraA09g059540.3C	0.625264	0.347139
BraA09g059640.3C	0.709355	0.399052
BraA09g059740.3C	0.803486	0.703362
BraA09g060680.3C	0.72807	0.596088
BraA09g060940.3C	0.947107	0.584752
BraA09g060970.3C	0.895725	0.660589
BraA09g061090.3C	0.825801	0.518613
BraA09g062860.3C	0.880887	0.63085
BraA09g063140.3C	0.583525	0.253701
BraA09g064130.3C	0.930251	0.471263
BraA09g064570.3C	0.915652	0.741166
BraA09g064990.3C	0.895556	0.467744
BraA09g065700.3C	0.602985	0.556518
BraA09g065910.3C	0.812082	0.503754
BraA09g065960.3C	0.787155	0.85406
BraA09g066140.3C	0.783825	0.453359
BraA10g000230.3C	0.729456	0.695315
BraA10g000850.3C	0.648424	0.910208
BraA10g001070.3C	0.746296	0.785302
BraA10g002450.3C	0.710099	0.22267
BraA10g003770.3C	0.865127	0.537314
BraA10g003850.3C	0.840312	0.73776
BraA10g004080.3C	0.971435	0.62695
BraA10g004760.3C	0.877264	0.532357
BraA10g005660.3C	0.628174	0.433399
BraA10g007150.3C	0.530007	0.798309
BraA10g007260.3C	0.854292	0.350532
BraA10g007340.3C	0.936537	0.702339
BraA10g007970.3C	0.826381	0.656096
BraA10g008190.3C	0.75472	0.228232
BraA10g008420.3C	0.841229	0.559296
BraA10g009030.3C	0.933217	0.835847
BraA10g010130.3C	0.85953	0.419881
BraA10g012120.3C	0.831779	0.604901
BraA10g012610.3C	0.862007	0.859117
BraA10g012750.3C	0.522993	0.750226
BraA10g012800.3C	0.731399	0.190639
BraA10g013620.3C	0.880063	0.556295
BraA10g014890.3C	0.852105	0.682054
BraA10g015620.3C	0.715508	0.513836
BraA10g016590.3C	0.818189	0.883211
BraA10g016780.3C	0.746604	0.207264
BraA10g018050.3C	0.652502	0.688333
BraA10g018080.3C	0.71429	0.953115
BraA10g018280.3C	0.818869	0.303134
BraA10g018410.3C	0.921256	0.438966
BraA10g023300.3C	0.696581	0.0630057
BraA10g024180.3C	0.955983	0.806487
BraA10g024960.3C	0.835681	0.352582
BraA10g025320.3C	0.757718	0.822475
BraA10g026220.3C	0.851251	0.714717
BraA10g026590.3C	0.866427	0.608836
BraA10g027330.3C	0.671694	0.583699
BraA10g027430.3C	0.693974	0.30919
BraA10g028380.3C	0.547786	0.0740861
BraA10g028680.3C	0.659781	0.98405
BraA10g029360.3C	0.51663	0.166189
BraA10g029880.3C	0.458352	0.28606
BraA10g030120.3C	0.677767	0.3384
BraA10g031400.3C	0.835674	0.391002
BraA10g032730.3C	0.762343	0.736647
BraA10g033350.3C	0.741908	0.423507
BraA10g033720.3C	0.621559	0.0281613
BraAnng003610.3C	0.725181	0.304193

## Sheet: darkturquoise
Table S6 The module membership and gene significance of genes in darkturquoise module of WGCNA.
GeneID(487）	Module Membership	gene significance
BraA01g000950.3C	0.533295	0.386436
BraA01g002230.3C	0.851723	0.723096
BraA01g002270.3C	0.870111	0.650128
BraA01g002630.3C	0.902525	0.771186
BraA01g003280.3C	0.270928	0.0140699
BraA01g003880.3C	0.869172	0.690955
BraA01g004140.3C	0.925511	0.951366
BraA01g004220.3C	0.672492	0.694227
BraA01g004890.3C	0.483749	0.271368
BraA01g005360.3C	0.627964	0.560687
BraA01g006730.3C	0.522955	0.391735
BraA01g007210.3C	0.832622	0.652559
BraA01g007310.3C	0.929061	0.929984
BraA01g007900.3C	0.593806	0.483058
BraA01g008910.3C	0.730653	0.56031
BraA01g009120.3C	0.896901	0.822855
BraA01g010020.3C	0.936917	0.782965
BraA01g011280.3C	0.403244	0.224279
BraA01g012320.3C	0.659021	0.483092
BraA01g013050.3C	0.727867	0.510585
BraA01g013470.3C	0.940794	0.953256
BraA01g013480.3C	0.928754	0.871701
BraA01g014300.3C	0.616227	0.321767
BraA01g014550.3C	0.619926	0.537137
BraA01g014560.3C	0.787253	0.688402
BraA01g015000.3C	0.571673	0.351104
BraA01g015350.3C	0.852715	0.647368
BraA01g017200.3C	0.543174	0.36009
BraA01g018450.3C	0.969486	0.950249
BraA01g018680.3C	0.617399	0.642826
BraA01g020080.3C	0.748277	0.646018
BraA01g020100.3C	0.64034	0.517291
BraA01g020730.3C	0.512488	0.375732
BraA01g021360.3C	0.610552	0.739631
BraA01g021870.3C	0.266045	0.0846358
BraA01g021910.3C	0.474904	0.316129
BraA01g022030.3C	0.90804	0.883854
BraA01g025010.3C	0.679167	0.56335
BraA01g025110.3C	0.642752	0.430537
BraA01g025380.3C	0.749768	0.643502
BraA01g026270.3C	0.329369	0.329203
BraA01g027660.3C	0.70841	0.522855
BraA01g027800.3C	0.740239	0.529545
BraA01g029060.3C	0.561415	0.351015
BraA01g029440.3C	0.718311	0.496465
BraA01g029990.3C	0.772784	0.646785
BraA01g031350.3C	0.562239	0.276536
BraA01g031380.3C	0.889369	0.961506
BraA01g032750.3C	0.764491	0.601437
BraA01g033070.3C	0.259903	0.0138155
BraA01g033780.3C	0.363612	0.148089
BraA01g034450.3C	0.895186	0.731239
BraA01g035640.3C	0.951452	0.920955
BraA01g037160.3C	0.369309	0.503155
BraA01g038440.3C	0.890665	0.732041
BraA01g039550.3C	0.307927	0.049572
BraA01g039830.3C	0.779299	0.679609
BraA01g041320.3C	0.793375	0.670675
BraA01g041420.3C	0.958971	0.917734
BraA01g042240.3C	0.3539	0.440751
BraA01g044470.3C	0.776421	0.562691
BraA02g001590.3C	0.618982	0.394175
BraA02g002460.3C	0.871127	0.760597
BraA02g005540.3C	0.851938	0.742671
BraA02g007350.3C	0.855671	0.886206
BraA02g012560.3C	0.40642	0.156724
BraA02g015160.3C	0.9158	0.885285
BraA02g015170.3C	0.841633	0.695382
BraA02g015450.3C	0.804901	0.882663
BraA02g015560.3C	0.822882	0.844662
BraA02g015690.3C	0.510137	0.601214
BraA02g016060.3C	0.79286	0.627648
BraA02g016320.3C	0.687576	0.592488
BraA02g016340.3C	0.921343	0.959503
BraA02g018340.3C	0.750721	0.544592
BraA02g018440.3C	0.712634	0.51418
BraA02g019850.3C	0.751558	0.625812
BraA02g020070.3C	0.758733	0.699738
BraA02g021090.3C	0.921539	0.866058
BraA02g021820.3C	0.751105	0.703922
BraA02g023170.3C	0.330222	0.213826
BraA02g023770.3C	0.708145	0.786436
BraA02g024390.3C	0.863996	0.780764
BraA02g025670.3C	0.543146	0.533862
BraA02g025770.3C	0.856414	0.741261
BraA02g026330.3C	0.376217	0.298214
BraA02g026740.3C	0.91118	0.839473
BraA02g031780.3C	0.725771	0.71579
BraA02g032620.3C	0.549315	0.371142
BraA02g032790.3C	0.56908	0.435225
BraA02g037510.3C	0.647907	0.5946
BraA02g037530.3C	0.861396	0.88497
BraA02g037860.3C	0.549997	0.503088
BraA02g040140.3C	0.346661	0.196213
BraA02g043500.3C	0.423774	0.456857
BraA02g043710.3C	0.908901	0.886669
BraA02g044520.3C	0.724872	0.543888
BraA02g044850.3C	0.659959	0.626362
BraA02g045370.3C	0.853664	0.787995
BraA02g045510.3C	0.906367	0.859333
BraA03g002010.3C	0.883634	0.860242
BraA03g002040.3C	0.856206	0.795622
BraA03g002390.3C	0.748633	0.604368
BraA03g002480.3C	0.927556	0.861442
BraA03g004040.3C	0.886372	0.71491
BraA03g007960.3C	0.671431	0.534067
BraA03g009170.3C	0.693527	0.713485
BraA03g013330.3C	0.850563	0.734456
BraA03g013620.3C	0.561011	0.551129
BraA03g014290.3C	0.912343	0.844464
BraA03g014820.3C	0.818292	0.738237
BraA03g016460.3C	0.588029	0.371349
BraA03g016510.3C	0.746383	0.82924
BraA03g018120.3C	0.891358	0.802477
BraA03g019950.3C	0.215013	0.158873
BraA03g020420.3C	0.833868	0.825707
BraA03g020630.3C	0.404069	0.170706
BraA03g025650.3C	0.697572	0.64534
BraA03g026250.3C	0.834385	0.835934
BraA03g026740.3C	0.953327	0.923749
BraA03g028370.3C	0.928706	0.867861
BraA03g029380.3C	0.858374	0.837164
BraA03g032230.3C	0.807264	0.768506
BraA03g032240.3C	0.941865	0.882866
BraA03g038470.3C	0.832623	0.758381
BraA03g040730.3C	0.912832	0.848654
BraA03g042470.3C	0.861677	0.81876
BraA03g042540.3C	0.489454	0.425888
BraA03g044250.3C	0.866167	0.661823
BraA03g045600.3C	0.84861	0.749606
BraA03g047090.3C	0.725187	0.69333
BraA03g047440.3C	0.868193	0.856547
BraA03g049390.3C	0.700694	0.444919
BraA03g050440.3C	0.922625	0.872231
BraA03g051600.3C	0.511717	0.415509
BraA03g051640.3C	0.859806	0.746783
BraA03g052240.3C	0.725687	0.631796
BraA03g052910.3C	0.686658	0.672079
BraA03g056430.3C	0.902167	0.853427
BraA03g057500.3C	0.580277	0.34436
BraA03g058510.3C	0.643548	0.489561
BraA03g059570.3C	0.882209	0.831612
BraA03g059930.3C	0.371688	0.583654
BraA03g060140.3C	0.387921	0.218181
BraA03g060330.3C	0.585719	0.381484
BraA04g000630.3C	0.83205	0.733391
BraA04g001100.3C	0.962275	0.804592
BraA04g003000.3C	0.938911	0.893136
BraA04g003010.3C	0.793492	0.808552
BraA04g003080.3C	0.687373	0.495295
BraA04g004630.3C	0.729159	0.627785
BraA04g005790.3C	0.907162	0.944002
BraA04g006250.3C	0.592846	0.439996
BraA04g006730.3C	0.88107	0.943808
BraA04g007060.3C	0.820846	0.632633
BraA04g012060.3C	0.909686	0.845745
BraA04g013270.3C	0.683547	0.678519
BraA04g013300.3C	0.765883	0.647322
BraA04g014030.3C	0.935056	0.839859
BraA04g014870.3C	0.764674	0.748837
BraA04g016200.3C	0.807843	0.599984
BraA04g016450.3C	0.923277	0.754518
BraA04g017350.3C	0.858327	0.963811
BraA04g018070.3C	0.904902	0.815781
BraA04g018100.3C	0.439988	0.312506
BraA04g018500.3C	0.847929	0.808056
BraA04g019180.3C	0.869517	0.677998
BraA04g019450.3C	0.953091	0.919763
BraA04g026760.3C	0.579384	0.409515
BraA04g027590.3C	0.446293	0.483133
BraA04g028830.3C	0.839514	0.702021
BraA04g029170.3C	0.689311	0.635682
BraA04g029270.3C	0.439682	0.532414
BraA04g030280.3C	0.0685677	0.0486185
BraA04g030320.3C	0.799165	0.727976
BraA04g030940.3C	0.82191	0.867422
BraA04g031660.3C	0.914591	0.795354
BraA05g001080.3C	0.839593	0.661174
BraA05g001400.3C	0.497231	0.26025
BraA05g002320.3C	0.89893	0.741266
BraA05g002420.3C	0.394077	0.492181
BraA05g004460.3C	0.732807	0.624467
BraA05g005570.3C	0.719226	0.753464
BraA05g006950.3C	0.889134	0.844162
BraA05g007800.3C	0.725597	0.680632
BraA05g008260.3C	0.808617	0.805684
BraA05g008760.3C	0.85357	0.957743
BraA05g009990.3C	0.791121	0.94592
BraA05g010730.3C	0.453792	0.378308
BraA05g011960.3C	0.595492	0.727817
BraA05g013260.3C	0.571951	0.408415
BraA05g013310.3C	0.868466	0.710343
BraA05g013840.3C	0.825067	0.956524
BraA05g014240.3C	0.877036	0.726966
BraA05g014510.3C	0.817777	0.646607
BraA05g014700.3C	0.467151	0.436384
BraA05g015810.3C	0.59926	0.422258
BraA05g016670.3C	0.950221	0.871358
BraA05g018200.3C	0.53846	0.531539
BraA05g020050.3C	0.891201	0.834315
BraA05g020710.3C	0.789418	0.71347
BraA05g024400.3C	0.526072	0.434459
BraA05g024980.3C	0.751291	0.456904
BraA05g025670.3C	0.672565	0.572297
BraA05g025820.3C	0.71815	0.613471
BraA05g025870.3C	0.663173	0.495797
BraA05g025990.3C	0.896211	0.879057
BraA05g027450.3C	0.672386	0.502387
BraA05g027740.3C	0.85041	0.699916
BraA05g028100.3C	0.852887	0.84589
BraA05g028350.3C	0.609683	0.457855
BraA05g028640.3C	0.888577	0.943039
BraA05g030710.3C	0.279197	0.214918
BraA05g031110.3C	0.881783	0.702737
BraA05g031380.3C	0.113064	0.100459
BraA05g031790.3C	0.677704	0.557399
BraA05g033120.3C	0.216511	0.0979326
BraA05g033340.3C	0.505745	0.310681
BraA05g033730.3C	0.942061	0.839369
BraA05g034830.3C	0.487911	0.428121
BraA05g035200.3C	0.942151	0.927541
BraA05g035790.3C	0.444155	0.421757
BraA05g036660.3C	0.535521	0.349937
BraA05g036670.3C	0.739042	0.649499
BraA05g037690.3C	0.833369	0.750067
BraA05g039550.3C	0.746884	0.583889
BraA05g041260.3C	0.662424	0.428622
BraA05g041380.3C	0.752972	0.64202
BraA05g041480.3C	0.959672	0.834397
BraA05g041590.3C	0.810616	0.679087
BraA05g041910.3C	0.892507	0.809747
BraA05g042020.3C	0.899334	0.936419
BraA06g000800.3C	0.522617	0.464891
BraA06g002010.3C	0.828449	0.806572
BraA06g002360.3C	0.707565	0.496213
BraA06g004570.3C	0.498564	0.586371
BraA06g005610.3C	0.37137	0.278857
BraA06g006770.3C	0.944941	0.896719
BraA06g009090.3C	0.729844	0.72854
BraA06g010990.3C	0.416895	0.471519
BraA06g011060.3C	0.669371	0.844772
BraA06g012490.3C	0.56415	0.494847
BraA06g013450.3C	0.589613	0.515336
BraA06g014370.3C	0.814591	0.663503
BraA06g016610.3C	0.514964	0.477287
BraA06g019260.3C	0.821659	0.816704
BraA06g019780.3C	0.712446	0.51925
BraA06g019840.3C	0.626187	0.493127
BraA06g020250.3C	0.967231	0.858602
BraA06g021670.3C	0.705817	0.433607
BraA06g021760.3C	0.439977	0.308298
BraA06g022050.3C	0.670852	0.51488
BraA06g025120.3C	0.898871	0.910193
BraA06g025590.3C	0.74827	0.5473
BraA06g025890.3C	0.757564	0.666455
BraA06g026140.3C	0.9147	0.78986
BraA06g026170.3C	0.965024	0.794652
BraA06g026370.3C	0.860163	0.767673
BraA06g026420.3C	0.967556	0.872528
BraA06g026710.3C	0.928567	0.819461
BraA06g027220.3C	0.734483	0.56662
BraA06g027530.3C	0.871409	0.829836
BraA06g028240.3C	0.908811	0.692393
BraA06g028330.3C	0.732417	0.509496
BraA06g030300.3C	0.910708	0.850631
BraA06g030440.3C	0.791427	0.681048
BraA06g031240.3C	0.905595	0.836265
BraA06g033170.3C	0.900136	0.814025
BraA06g033230.3C	0.694415	0.583128
BraA06g033280.3C	0.32979	0.0852135
BraA06g033290.3C	0.682202	0.454884
BraA06g033350.3C	0.9474	0.851854
BraA06g033520.3C	0.788166	0.596662
BraA06g036130.3C	0.731535	0.715794
BraA06g036390.3C	0.631356	0.688346
BraA06g037150.3C	0.933382	0.867009
BraA06g037690.3C	0.864795	0.856319
BraA06g038450.3C	0.469552	0.24588
BraA06g039220.3C	0.805479	0.95737
BraA06g039830.3C	0.804115	0.601219
BraA06g040090.3C	0.861976	0.689631
BraA06g040100.3C	0.906796	0.76946
BraA06g040110.3C	0.82047	0.637382
BraA06g040320.3C	0.825366	0.777376
BraA06g041860.3C	0.571856	0.43553
BraA06g043250.3C	0.407557	0.291711
BraA06g043820.3C	0.626237	0.653943
BraA06g044220.3C	0.799189	0.556506
BraA07g001140.3C	0.924289	0.876549
BraA07g002180.3C	0.556786	0.398929
BraA07g003540.3C	0.751223	0.58749
BraA07g005680.3C	0.624722	0.410021
BraA07g012500.3C	0.674586	0.584446
BraA07g013960.3C	0.84484	0.814753
BraA07g014290.3C	0.757145	0.861694
BraA07g014410.3C	0.713752	0.584674
BraA07g017340.3C	0.814509	0.789744
BraA07g018590.3C	0.465429	0.421458
BraA07g018660.3C	0.554345	0.393313
BraA07g020670.3C	0.777351	0.640076
BraA07g021520.3C	0.926168	0.942944
BraA07g022080.3C	0.881065	0.93246
BraA07g023120.3C	0.829121	0.662399
BraA07g024690.3C	0.645506	0.484476
BraA07g025800.3C	0.727075	0.528412
BraA07g026290.3C	0.856255	0.604944
BraA07g029040.3C	0.816906	0.619419
BraA07g029820.3C	0.918285	0.819137
BraA07g029920.3C	0.775194	0.843039
BraA07g030280.3C	0.87319	0.754699
BraA07g030350.3C	0.0884471	0.0191963
BraA07g032020.3C	0.781228	0.698138
BraA07g032110.3C	0.723214	0.614136
BraA07g032420.3C	0.634723	0.391032
BraA07g032770.3C	0.881353	0.920866
BraA07g033490.3C	0.765327	0.619535
BraA07g034960.3C	0.853463	0.765237
BraA07g035000.3C	0.813822	0.705868
BraA07g035450.3C	0.705612	0.560971
BraA07g035560.3C	0.80977	0.757356
BraA07g035650.3C	0.188531	0.0769392
BraA07g036110.3C	0.828964	0.743177
BraA07g036120.3C	0.868495	0.837337
BraA07g037350.3C	0.539584	0.361244
BraA07g037440.3C	0.425853	0.185285
BraA07g037450.3C	0.395228	0.137893
BraA07g037830.3C	0.773154	0.613841
BraA07g038060.3C	0.640912	0.556973
BraA07g038210.3C	0.508309	0.333401
BraA07g040780.3C	0.419485	0.258064
BraA07g040930.3C	0.889699	0.902082
BraA07g041040.3C	0.600532	0.355291
BraA07g042450.3C	0.638243	0.357833
BraA07g042550.3C	0.841064	0.707841
BraA07g042570.3C	0.45435	0.328125
BraA07g042690.3C	0.720392	0.562416
BraA07g042940.3C	0.813644	0.90406
BraA08g000340.3C	0.787044	0.722285
BraA08g001350.3C	0.812648	0.635747
BraA08g001720.3C	0.826776	0.739099
BraA08g002740.3C	0.43856	0.200931
BraA08g003060.3C	0.880111	0.738392
BraA08g004010.3C	0.768781	0.656274
BraA08g004960.3C	0.909008	0.926993
BraA08g005140.3C	0.340999	0.556037
BraA08g006260.3C	0.810703	0.879402
BraA08g008060.3C	0.942988	0.849935
BraA08g008250.3C	0.697895	0.362489
BraA08g008830.3C	0.899783	0.849369
BraA08g009410.3C	0.918472	0.772659
BraA08g014160.3C	0.807692	0.7754
BraA08g014350.3C	0.252726	0.0487476
BraA08g015020.3C	0.696549	0.533
BraA08g015120.3C	0.953159	0.928646
BraA08g015620.3C	0.261928	0.0919614
BraA08g015840.3C	0.86067	0.767651
BraA08g016000.3C	0.861616	0.820379
BraA08g016300.3C	0.267026	0.178977
BraA08g016750.3C	0.406258	0.248248
BraA08g017460.3C	0.460566	0.584415
BraA08g017910.3C	0.573844	0.368153
BraA08g019000.3C	0.826327	0.570244
BraA08g019170.3C	0.861004	0.719672
BraA08g019220.3C	0.602022	0.386988
BraA08g019320.3C	0.897065	0.811986
BraA08g019500.3C	0.468581	0.382047
BraA08g020420.3C	0.875304	0.715303
BraA08g021490.3C	0.629182	0.431494
BraA08g024360.3C	0.845938	0.669724
BraA08g025240.3C	0.189807	0.0551873
BraA08g026110.3C	0.940346	0.89627
BraA08g027440.3C	0.690714	0.457016
BraA08g027750.3C	0.623889	0.505134
BraA08g028110.3C	0.95295	0.902063
BraA08g028290.3C	0.216835	0.212958
BraA08g028310.3C	0.905649	0.959186
BraA08g028540.3C	0.438922	0.386756
BraA08g029370.3C	0.636957	0.435078
BraA08g029420.3C	0.56454	0.266628
BraA08g029610.3C	0.734021	0.840116
BraA08g030380.3C	0.765972	0.629188
BraA08g030670.3C	0.9137	0.828204
BraA08g032860.3C	0.70784	0.619532
BraA08g033490.3C	0.832522	0.659183
BraA08g033890.3C	0.690609	0.572155
BraA09g001040.3C	0.393706	0.350237
BraA09g003670.3C	0.933006	0.896311
BraA09g005830.3C	0.406329	0.359546
BraA09g006550.3C	0.898542	0.864837
BraA09g007740.3C	0.416447	0.261532
BraA09g009310.3C	0.901803	0.871945
BraA09g011740.3C	0.936834	0.802283
BraA09g012220.3C	0.519113	0.428453
BraA09g012460.3C	0.849021	0.864136
BraA09g013260.3C	0.829389	0.774211
BraA09g013770.3C	0.855154	0.747067
BraA09g014880.3C	0.811722	0.674768
BraA09g016230.3C	0.861217	0.972997
BraA09g017440.3C	0.893467	0.805023
BraA09g017910.3C	0.931418	0.898658
BraA09g018980.3C	0.63808	0.553822
BraA09g019200.3C	0.892108	0.813757
BraA09g019760.3C	0.450581	0.359335
BraA09g021160.3C	0.757852	0.777288
BraA09g022170.3C	0.456146	0.440118
BraA09g026540.3C	0.91336	0.9643
BraA09g026610.3C	0.643717	0.450936
BraA09g030000.3C	0.877478	0.759515
BraA09g033630.3C	0.853403	0.824717
BraA09g033640.3C	0.780998	0.709005
BraA09g034360.3C	0.185922	0.0714012
BraA09g035530.3C	0.769222	0.624786
BraA09g035710.3C	0.888172	0.775187
BraA09g036800.3C	0.688461	0.617441
BraA09g037290.3C	0.476653	0.34517
BraA09g038640.3C	0.495448	0.310677
BraA09g039210.3C	0.83185	0.715721
BraA09g040030.3C	0.476904	0.409412
BraA09g040200.3C	0.891524	0.911124
BraA09g040210.3C	0.84863	0.609892
BraA09g041020.3C	0.842664	0.836544
BraA09g041440.3C	0.560822	0.347082
BraA09g041700.3C	0.424514	0.298639
BraA09g042200.3C	0.787806	0.569671
BraA09g043660.3C	0.744802	0.608396
BraA09g043890.3C	0.895617	0.9522
BraA09g044010.3C	0.511317	0.32391
BraA09g044870.3C	0.70365	0.565536
BraA09g045240.3C	0.569358	0.361052
BraA09g045440.3C	0.77556	0.783334
BraA09g046100.3C	0.642488	0.522915
BraA09g046730.3C	0.897918	0.833683
BraA09g048320.3C	0.501233	0.431738
BraA09g048360.3C	0.353935	0.1951
BraA09g048550.3C	0.833871	0.8592
BraA09g049560.3C	0.822201	0.663919
BraA09g050960.3C	0.895225	0.752052
BraA09g051710.3C	0.862325	0.675215
BraA09g052020.3C	0.833124	0.778392
BraA09g052840.3C	0.743706	0.476206
BraA09g054520.3C	0.953973	0.959439
BraA09g054810.3C	0.97562	0.88004
BraA09g054850.3C	0.947206	0.845183
BraA09g056550.3C	0.476107	0.513613
BraA09g056770.3C	0.642117	0.531495
BraA09g057050.3C	0.840031	0.690106
BraA09g057070.3C	0.75597	0.792979
BraA09g058470.3C	0.529514	0.449108
BraA09g058650.3C	0.689354	0.563206
BraA09g058680.3C	0.656829	0.483204
BraA09g059100.3C	0.557127	0.296438
BraA09g059180.3C	0.49261	0.260311
BraA09g060230.3C	0.676756	0.421644
BraA09g061080.3C	0.533633	0.371663
BraA09g061280.3C	0.665017	0.582448
BraA09g062320.3C	0.757997	0.592304
BraA09g062490.3C	0.87858	0.784547
BraA09g062730.3C	0.62322	0.408295
BraA09g064540.3C	0.437843	0.334364
BraA09g065130.3C	0.608678	0.65097
BraA09g065230.3C	0.7179	0.540815
BraA10g001370.3C	0.91578	0.892395
BraA10g001460.3C	0.400687	0.620052
BraA10g002850.3C	0.686707	0.807771
BraA10g003610.3C	0.836991	0.712661
BraA10g004570.3C	0.423303	0.40646
BraA10g005820.3C	0.540467	0.469023
BraA10g009190.3C	0.451617	0.256114
BraA10g010540.3C	0.830216	0.777497
BraA10g011930.3C	0.827975	0.706395
BraA10g012190.3C	0.611369	0.439413
BraA10g018990.3C	0.900223	0.708783
BraA10g019330.3C	0.663829	0.600439
BraA10g021130.3C	0.147784	0.00941768
BraA10g022630.3C	0.89626	0.859286
BraA10g022900.3C	0.838213	0.727571
BraA10g024510.3C	0.675669	0.782829
BraA10g024630.3C	0.905465	0.84983
BraA10g024990.3C	0.717421	0.629933
BraA10g026990.3C	0.837621	0.797015
BraA10g027520.3C	0.942209	0.93129
BraA10g028120.3C	0.926719	0.882738
BraA10g028230.3C	0.921299	0.944856
BraA10g029480.3C	0.792491	0.635552
BraA10g029980.3C	0.922923	0.916876
BraA10g030140.3C	0.825569	0.66658
BraA10g031300.3C	0.769423	0.783705
