# Supplementary material for: Transcriptome and Coexpression Network Analyses Reveal Hub Genes in Chinese Cabbage (Brassica rapa L. ssp. pekinensis) During Different Stages of Plasmodiophora brassicae Infection
Source: Front Plant Sci. 2021 Aug 10;12:650252. doi: 10.3389/fpls.2021.650252 (PMC8383047; doi:10.3389/fpls.2021.650252)
Supplement: Supplementary Table 7 — The FPKM and annotation of auxin-related genes, pathogenesis-related genes, MYBs, WRKYs, disease resistance proteins, antioxidation genes, and ten hub genes involving clubroot resistances. [file Table_7.XLSX]

## Sheet: Auxin gene family(67)
The FPKM and annotation of auxin-related genes involving clubroot resistances.
	ID	DH199S0d1	DH199S0d2	DH199S0d3	DH199S2d1	DH199S2d2	DH199S2d3	DH199S5d1	DH199S5d2	DH199S5d3	DH199S8d1	DH199S8d2	DH199S8d3	DH199S13d1	DH199S13d2	DH199S13d3	DH199S22d1	DH199S22d2	DH199S22d3	DH40R0d1	DH40R0d2	DH40R0d3	DH40R2d1	DH40R2d2	DH40R2d3	DH40R5d1	DH40R5d2	DH40R5d3	DH40R8d1	DH40R8d2	DH40R8d3	DH40R13d1	DH40R13d2	DH40R13d3	DH40R22d1	DH40R22d2	DH40R22d3	GeneName	Biotype	Position	NR:Seq-id	NR:Score	NR:Evalue	NR:Description	NT:Seq-id	NT:Score	NT:Evalue	NT:Description	Uniprot:UniProtKB-AC
AUX/IAA (23 )	BraA01g008460.3C	38.8638	18.5704	37.3119	34.2876	32.0836	33.9821	33.2528	34.9372	35.735	110.262	116.87	108.491	43.7836	47.722	47.729	49.3036	49.3794	24.6591	50.8227	11.2959	13.731	25.2761	33.256	31.4585	40.9191	25.6524	32.8195	59.2724	63.8608	60.4755	54.8373	55.9624	56.2757	16.7005	13.6124	22.2812	BraA01g008460.3C	protein_coding	chrA01:4165061-4166357:+	gi|685258070|ref|XP_009129008.1|	1303	4e-179	PREDICTED: auxin-responsive protein IAA27 [Brassica rapa]	gi|923508714|ref|XM_013882835.1|	873	0	PREDICTED: Brassica napus auxin-responsive protein IAA27-like (LOC106441059), mRNA	Q9ZSY8
	BraA01g008880.3C	5.26976	3.98421	5.01225	6.07856	5.85528	6.86722	6.18199	2.54843	3.7883	5.06247	3.74614	3.52657	4.42519	3.72577	2.4749	4.88601	6.52531	6.57009	12.0253	12.6222	15.3682	12.6455	19.8964	16.9173	8.73283	8.90701	7.67962	5.66461	6.10627	8.60308	17.2442	14.4376	14.6669	6.82884	5.06515	6.80068	BraA01g008880.3C	protein_coding	chrA01:4389035-4390429:-	gi|685258172|ref|XP_009129458.1|	1185	5e-162	PREDICTED: auxin-responsive protein IAA11 [Brassica rapa]	gi|685258171|ref|XM_009131210.1|	726	0	PREDICTED: Brassica rapa auxin-responsive protein IAA11 (LOC103854273), mRNA	Q38829
	BraA01g031100.3C	117.638	133.189	124.338	174.32	167.822	175.745	204.015	220.016	220.475	134.961	144.249	141.395	77.7544	77.25	75.8512	226.944	223.798	129.502	145.62	85.668	89.7001	162.194	230.09	264.442	174.583	160.218	152.657	78.1582	76.2932	82.8921	270.17	255.252	290.387	245.118	261.601	218.866	BraA01g031100.3C	protein_coding	chrA01:21036156-21036827:+	gi|685264166|ref|XP_009108345.1|	851	5e-114	PREDICTED: auxin-responsive protein IAA2-like [Brassica rapa]	gi|685264165|ref|XM_009110097.1|	588	0	PREDICTED: Brassica rapa auxin-responsive protein IAA2-like (LOC103834036), mRNA	P49678
	BraA01g042940.3C	265.845	77.4533	269.216	245.886	254.447	246.525	173.885	184.446	174.115	211.658	225.688	228.361	226.753	226.313	244.123	79.7914	83.9755	124.654	138.186	123.328	117.11	128.875	201.606	199.03	172.279	129.71	137.215	80.7964	68.6956	66.9748	202.916	202.359	205.965	63.0405	64.7164	58.6055	BraA01g042940.3C	protein_coding	chrA01:28581774-28583336:+	gi|685267757|ref|XP_009124981.1|	1063	2e-144	PREDICTED: auxin-responsive protein IAA16-like [Brassica rapa]	gi|685267756|ref|XM_009126733.1|	711	0	PREDICTED: Brassica rapa auxin-responsive protein IAA16-like (LOC103850030), mRNA	O24407
	BraA03g040660.3C	38.228	34.7433	48.0386	65.6921	67.4165	67.2349	67.8419	72.8467	78.6921	97.3901	95.474	88.3255	51.4763	50.8491	58.0135	106.599	104.371	64.5768	58.4147	51.8239	51.1082	64.689	83.3754	79.5447	59.3916	54.0215	60.0946	58.7621	51.8168	49.319	84.804	91.0874	98.7061	35.682	29.2945	28.7638	BraA03g040660.3C	protein_coding	chrA03:20266919-20267521:-	gi|685289797|ref|XP_009135841.1|	899	1e-121	PREDICTED: auxin-responsive protein IAA2-like [Brassica rapa]	gi|685289796|ref|XM_009137593.1|	516	0	PREDICTED: Brassica rapa auxin-responsive protein IAA2-like (LOC103859988), mRNA	P49678
	BraA03g040670.3C	15.2255	2.16246	14.0372	24.474	20.5215	22.6214	3.58746	5.22536	5.13216	20.887	18.5407	23.3136	34.8682	34.3773	34.6763	14.6821	16.3901	8.49984	14.4455	15.3045	12.7853	15.4524	11.0042	9.51108	19.2226	23.5568	21.7149	13.6716	10.1302	10.3906	21.8695	21.9426	23.4571	2.45035	2.663	2.32404	BraA03g040670.3C	protein_coding	chrA03:20285557-20287404:+	gi|685289800|ref|XP_009135842.1|	1155	2e-158	PREDICTED: auxin-responsive protein IAA7-like [Brassica rapa]	gi|923550788|ref|XM_013881099.1|	714	0	PREDICTED: Brassica napus auxin-responsive protein IAA7-like (LOC106439612), mRNA	Q38825
	BraA03g057220.3C	0.718603	0.468731	0.978001	0.884154	2.04254	0.788042	0.466566	0.509687	0.676481	0.987799	0.775064	0.729635	0.505737	0.128475	0.589262	0.673933	0.489398	0.312862	1.33614	0.364102	2.0155	0.766394	1.30897	1.77358	1.15582	1.54905	0.24773	0.826089	0.888184	0.824953	1.78829	1.64639	2.58137	1.36577	1.039	0.629692	BraA03g057220.3C	protein_coding	chrA03:30044307-30045458:+	gi|685294384|ref|XP_009138073.1|	1161	4e-159	PREDICTED: auxin-responsive protein IAA29-like [Brassica rapa]	gi|685294383|ref|XM_009139825.1|	732	0	PREDICTED: Brassica rapa auxin-responsive protein IAA29-like (LOC103862115), mRNA	Q93WC4
	BraA04g000840.3C	23.0104	46.8288	24.6618	32.4874	35.8415	33.9576	49.5258	49.4517	40.8105	14.2336	15.3874	14.4855	10.2023	6.91134	12.4534	16.5087	20.6858	11.1201	12.1353	14.6902	15.2472	13.9882	25.6517	27.5222	6.9086	7.93632	7.85323	1.13367	1.91974	1.81137	24.0504	27.495	29.306	11.5893	11.4781	5.80705	BraA04g000840.3C	protein_coding	chrA04:493489-494378:-	gi|923617267|ref|XP_013746311.1|	248	3e-24	PREDICTED: auxin-responsive protein IAA30-like [Brassica napus]	gi|923617266|ref|XM_013890857.1|	230	4e-116	PREDICTED: Brassica napus auxin-responsive protein IAA30-like (LOC106449048), mRNA	Q9M1R4
	BraA05g030000.3C	0.551381	0.539483	0.375208	0.848009	1.67171	0.863802	0.536991	0.19554	0.622873	0.189484	0.396469	0.186615	0.194025	0	0.542566	0	0.250342	0	0	0.372499	0.386621	1.1761	0.803494	2.303	0.197078	0.396192	0.570246	0	0.34075	0.180852	2.15623	0.777395	1.62055	0	0	0	BraA05g030000.3C	protein_coding	chrA05:22069021-22069758:+	gi|685310840|ref|XP_009146003.1|	639	1e-82	PREDICTED: auxin-responsive protein IAA31 isoform X2 [Brassica rapa]	gi|685310839|ref|XM_009147755.1|	477	0	PREDICTED: Brassica rapa auxin-responsive protein IAA31 (LOC103869675), transcript variant X2, mRNA	Q8H174
	BraA05g030630.3C	35.1496	13.8964	29.6204	53.462	52.0453	51.8644	32.3415	32.6128	35.4363	64.7855	77.0348	73.0384	59.6504	71.4643	66.9632	93.4316	85.4542	58.5883	30.3635	14.9104	14.7234	35.0898	65.7763	63.2021	57.1927	29.1845	29.589	18.8276	17.2389	20.712	73.4502	72.1754	78.882	40.782	43.2132	54.9039	BraA05g030630.3C	protein_coding	chrA05:22492727-22494195:+	gi|685311017|ref|XP_009146079.1|	1511	0	PREDICTED: auxin-responsive protein IAA26 isoform X1 [Brassica rapa]	gi|923628224|ref|XM_013894260.1|	858	0	PREDICTED: Brassica napus auxin-responsive protein IAA26-like (LOC106452205), mRNA	Q8LAL2
	BraA05g040420.3C	141.077	65.0728	127.031	133.206	133.617	134.384	81.9466	88.9843	84.9497	130.641	127.707	137.104	92.8157	103.772	99.4065	96.3957	104.487	104.142	59.404	75.9488	71.939	72.4088	76.5432	80.9262	67.5333	58.107	54.7141	47.2885	44.838	46.8516	119.564	122.007	119.702	44.5287	42.8903	42.1199	BraA05g040420.3C	protein_coding	chrA05:27410316-27411852:+	gi|687568977|ref|NP_001288939.1|	1068	3e-145	auxin-responsive protein IAA16 [Brassica rapa]	gi|923631442|ref|XM_013895324.1|	696	0	PREDICTED: Brassica napus auxin-responsive protein IAA16 (LOC106453092), mRNA	O24407
	BraA07g024980.3C	0.844601	0.495825	0.517266	3.42929	2.11259	3.81071	1.97414	2.69574	1.33576	1.56735	1.09315	1.54362	2.49653	1.63081	2.82573	4.99022	4.1415	1.54441	1.37055	1.36942	0.888335	3.60309	6.64624	5.96504	3.26034	1.82065	3.31929	1.33157	2.81857	2.16082	8.28726	6.43036	7.94351	2.24733	2.3813	3.19724	BraA07g024980.3C	protein_coding	chrA07:19426786-19427790:+	gi|685333498|ref|XP_009104363.1|	692	3e-90	PREDICTED: auxin-responsive protein IAA30 [Brassica rapa]	gi|685333497|ref|XM_009106115.1|	519	0	PREDICTED: Brassica rapa auxin-responsive protein IAA30 (LOC103830339), mRNA	Q9M1R4
	BraA08g010620.3C	5.06342	2.6894	6.05441	8.00991	7.73064	8.839	3.80413	2.61656	3.5954	19.3892	19.8166	18.5082	28.1009	27.0026	28.6136	21.369	19.114	39.1139	14.0854	10.5554	12.0207	18.8234	10.7517	9.55817	23.7343	20.2705	26.6322	34.9248	28.5648	31.8873	37.0305	35.6437	35.2911	16.6349	18.6687	16.5815	BraA08g010620.3C	protein_coding	chrA08:9283190-9284217:-	gi|685342465|ref|XP_009107777.1|	1068	8e-146	PREDICTED: auxin-responsive protein IAA14 [Brassica rapa]	gi|685342464|ref|XM_009109529.1|	603	0	PREDICTED: Brassica rapa auxin-responsive protein IAA14 (LOC103833444), mRNA	Q38832
	BraA08g010680.3C	2.03883	3.98966	1.56082	9.40699	11.5902	10.221	11.7482	11.0264	12.8594	11.5607	12.6444	12.9383	2.6904	5.28539	4.51402	18.6429	21.2907	3.99444	12.4067	5.50951	6.6119	12.3217	21.5402	20.5152	10.3844	8.05744	9.31291	9.87739	10.7099	10.8669	29.8989	25.871	27.2981	17.5988	13.8182	12.8633	BraA08g010680.3C	protein_coding	chrA08:9337798-9338396:+	gi|685342484|ref|XP_009107784.1|	919	1e-124	PREDICTED: auxin-responsive protein IAA1 [Brassica rapa]	gi|685342483|ref|XM_009109536.1|	516	0	PREDICTED: Brassica rapa auxin-responsive protein IAA1 (LOC103833452), mRNA	P49678
	BraA09g019950.3C	8.87133	8.67989	7.98992	25.8431	23.1391	24.6893	9.82565	8.51298	6.48456	17.5746	18.1986	25.6096	12.1196	13.6214	13.6933	20.555	25.5885	15.9038	29.6381	23.7967	20.6739	31.7232	34.2202	35.2703	22.942	11.624	14.5718	15.426	16.1248	12.3238	28.9411	28.6942	34.083	12.5629	12.6381	15.1816	BraA09g019950.3C	protein_coding	chrA09:12909318-12909909:+	gi|674899989|emb|CDY32934.1|	876	7e-118	BnaA09g16590D [Brassica napus]	gi|685358684|ref|XM_009115734.1|	492	0	PREDICTED: Brassica rapa auxin-responsive protein IAA4 (LOC103839230), mRNA	P33077
	BraA09g051620.3C	0.820876	1.92759	0.837894	18.0283	16.6127	19.4443	14.8698	16.2441	22.8119	8.29363	9.91617	9.50166	10.3989	11.4472	10.3392	18.2454	13.8645	6.433	7.65929	4.82469	4.66226	15.7584	27.4531	26.3692	5.98542	6.72413	4.24481	7.76497	9.43571	9.53131	23.463	27.4294	30.8815	8.89284	9.25765	9.66754	BraA09g051620.3C	protein_coding	chrA09:37934320-37935249:+	gi|923702410|ref|XP_013660017.1|	672	5e-87	PREDICTED: auxin-responsive protein IAA30-like [Brassica napus]	gi|685365570|ref|XM_009118640.1|	534	0	PREDICTED: Brassica rapa auxin-responsive protein IAA30-like (LOC103842038), mRNA	Q9M1R4
	BraA09g056770.3C（ERF）	18.2869	165.767	18.3915	1.32352	2.2422	2.35929	8.99212	14.401	13.6707	49.6278	51.4363	50.606	4.25843	7.88504	4.49864	6.05299	8.18066	3.16125	34.2748	17.8045	20.7423	3.34612	6.6621	5.41198	8.45865	12.1738	14.8334	81.0856	84.5927	84.5023	19.121	19.0527	19.8476	17.889	21.6773	20.266	BraA09g056770.3C	protein_coding	chrA09:40576558-40578435:+	gi|685367102|ref|XP_009117558.1|	956	2e-127	PREDICTED: ethylene-responsive transcription factor ERF017-like [Brassica rapa]	gi|685367101|ref|XM_009119310.1|	581	0	PREDICTED: Brassica rapa ethylene-responsive transcription factor ERF017-like (LOC103842657), mRNA	Q84QC2
	BraA09g064820.3C	0.845687	1.65488	0.383653	1.8209	4.27335	3.00303	2.8369	2.59924	2.65372	5.6187	6.08088	5.62906	2.67829	3.72949	4.06837	13.2186	14.0787	8.1002	4.00258	1.42831	0.889477	14.7315	18.3828	18.3035	4.9371	5.87409	7.19133	5.46274	4.61656	4.34569	12.026	11.4266	14.545	7.23286	6.72513	7.11411	BraA09g064820.3C	protein_coding	chrA09:44371477-44373727:-	gi|685369586|ref|XP_009118635.1|	844	4e-110	PREDICTED: auxin-responsive protein IAA12-like isoform X2 [Brassica rapa]	gi|685369590|ref|XM_009120389.1|	661	0	PREDICTED: Brassica rapa auxin-responsive protein IAA12-like (LOC103843644), transcript variant X4, mRNA	Q38830
	BraA09g064990.3C	13.0164	6.6175	13.0258	25.4358	23.2142	23.8704	13.5467	15.8849	14.1275	56.4404	52.1651	60.5098	38.9329	38.0555	36.0392	20.8242	18.5986	18.1678	28.3439	23.665	26.1729	17.4207	16.5971	17.2985	51.3135	43.8761	40.7813	50.0457	51.8133	51.4836	52.127	54.786	52.7588	8.00376	9.27164	13.0162	BraA09g064990.3C	protein_coding	chrA09:44447601-44449515:-	gi|685369645|ref|XP_009118658.1|	1059	5e-144	PREDICTED: auxin-responsive protein IAA17-like [Brassica rapa]	gi|685369644|ref|XM_009120410.1|	684	0	PREDICTED: Brassica rapa auxin-responsive protein IAA17-like (LOC103843662), mRNA	P93830
	BraA09g065000.3C	3.39054	4.26519	4.94404	33.9691	35.9788	36.4228	24.3723	29.0296	37.572	51.4338	53.1126	53.4421	9.88561	9.1792	10.1679	21.3499	17.1533	13.2854	47.159	1.4725	1.69814	37.0212	70.4067	63.6349	18.8705	7.30876	5.17632	34.045	26.94	27.6434	35.6444	40.4621	43.4982	11.3537	13.8314	16.468	BraA09g065000.3C	protein_coding	chrA09:44457557-44458290:+	gi|685369650|ref|XP_009118660.1|	958	2e-130	PREDICTED: auxin-responsive protein IAA3 [Brassica rapa]	gi|685369649|ref|XM_009120412.1|	543	0	PREDICTED: Brassica rapa auxin-responsive protein IAA3 (LOC103843664), mRNA	Q38822
	BraA05g001290.3C	2.9473	5.57189	3.36533	1.06023	1.64707	1.73735	3.55148	3.72028	2.76513	15.6047	14.3857	15.3685	2.05666	2.89365	2.01538	0.281093	0.748459	0.326232	10.1834	5.21403	4.8863	3.14331	3.76715	3.75566	7.49908	6.56866	6.66456	14.9636	14.2163	14.1565	6.02035	6.02182	4.94291	2.4685	2.27515	2.73147	BraA05g001290.3C	protein_coding	chrA05:805730-808621:-	gi|685303846|ref|XP_009142634.1|	2987	0	PREDICTED: auxin response factor 11 [Brassica rapa]	gi|685303845|ref|XM_009144386.1|	1755	0	PREDICTED: Brassica rapa auxin response factor 11 (LOC103866459), mRNA	Q9ZPY6
	BraA06g033000.3C	20.4727	6.13852	20.2231	15.5401	16.5188	19.3989	30.0684	14.5793	17.5319	28.2555	21.9032	23.4693	18.998	19.1275	17.8709	11.613	16.6414	16.6046	4.18617	5.6885	3.64669	11.7976	9.38318	10.1559	9.737	9.25343	8.19607	5.2059	6.88719	6.01103	7.92389	8.38005	8.411	8.0017	3.40171	3.4722	BraA06g033000.3C	protein_coding	chrA06:22595150-22596280:+	gi|685322576|ref|XP_009151108.1|	935	5e-127	PREDICTED: auxin-responsive protein IAA28 [Brassica rapa]	gi|685322577|ref|XM_009152861.1|	531	0	PREDICTED: Brassica rapa auxin-responsive protein IAA28 (LOC103874434), transcript variant X2, mRNA	Q9XFM0
	BraA10g002790.3C	18.7028	11.437	16.9694	18.0977	19.4922	16.6034	12.6491	17.9636	13.0582	40.7061	35.7218	42.5956	37.7055	35.1096	34.7628	9.13554	13.9758	12.3838	28.9795	31.4563	31.4194	11.9126	13.9112	14.795	18.5227	19.5983	22.9695	27.2594	30.822	28.1165	36.4311	37.7684	31.9381	6.29467	4.64781	5.05321	BraA10g002790.3C	protein_coding	chrA10:1447109-1448499:+	gi|923725567|ref|XP_013666390.1|	1188	7e-164	PREDICTED: auxin-responsive protein IAA17-like [Brassica napus]	gi|923725566|ref|XM_013810936.1|	672	0	PREDICTED: Brassica napus auxin-responsive protein IAA17-like (LOC106370934), mRNA	P93830
ARF (4)	BraA01g014680.3C	13.7663	20.6528	13.8545	15.3777	14.9377	14.8922	20.7456	20.556	23.3541	106.817	106.228	107.554	17.8471	18.9642	15.3999	4.34882	5.72394	5.48878	59.6192	39.8438	42.3197	22.1	24.812	24.045	35.9969	30.0916	30.0232	95.7616	97.3435	87.93	53.5253	55.4694	49.0255	16.4329	14.7187	15.3899	BraA01g014680.3C	protein_coding	chrA01:7807060-7810065:+	gi|923873162|ref|XP_013710271.1|	3032	0	PREDICTED: auxin response factor 9-like isoform X1 [Brassica napus]	gi|685259878|ref|XM_009139329.1|	1812	0	PREDICTED: Brassica rapa auxin response factor 9 (LOC103861608), mRNA	Q9XED8
	BraA05g001290.3C	2.9473	5.57189	3.36533	1.06023	1.64707	1.73735	3.55148	3.72028	2.76513	15.6047	14.3857	15.3685	2.05666	2.89365	2.01538	0.281093	0.748459	0.326232	10.1834	5.21403	4.8863	3.14331	3.76715	3.75566	7.49908	6.56866	6.66456	14.9636	14.2163	14.1565	6.02035	6.02182	4.94291	2.4685	2.27515	2.73147	BraA05g001290.3C	protein_coding	chrA05:805730-808621:-	gi|685303846|ref|XP_009142634.1|	2987	0	PREDICTED: auxin response factor 11 [Brassica rapa]	gi|685303845|ref|XM_009144386.1|	1755	0	PREDICTED: Brassica rapa auxin response factor 11 (LOC103866459), mRNA	Q9ZPY6
	BraA06g015500.3C	0	0	0.144102	0	0	0	0	0	0	0	0	0	0	0	0	0	0	0	7.01579	6.58081	6.38485	8.88326	8.33189	8.04077	4.08723	4.10834	2.62809	7.23355	9.68421	6.80686	6.47437	6.56842	4.70247	9.12271	8.26686	10.5399	BraA06g015500.3C	protein_coding	chrA06:8360680-8362032:+	gi|674907202|emb|CDY25846.1|	956	1e-127	BnaA05g14370D [Brassica napus]	gi|923643063|ref|XM_013786466.1|	359	0	PREDICTED: Brassica napus auxin response factor 2-like (LOC106346983), transcript variant X1, mRNA	Q94JM3
	BraA06g019050.3C(hub gene)	0	0	0	0	0	0	0	0	0	0	0	0	0	0.131163	0	0	0	0	85.3181	71.9896	76.005	89.3271	102.098	110.73	44.0532	39.1409	42.7422	74.3372	71.7478	73.7536	63.7691	59.3463	61.4521	94.5828	96.2623	106.073	BraA06g019050.3C	protein_coding	chrA06:10828058-10833132:+	gi|674907202|emb|CDY25846.1|	939	1e-124	BnaA05g14370D [Brassica napus]	gi|923643063|ref|XM_013786466.1|	266	8e-136	PREDICTED: Brassica napus auxin response factor 2-like (LOC106346983), transcript variant X1, mRNA	Q94JM3
ARP (3)	BraA01g037470.3C	225.484	212.495	216.938	94.077	93.635	103.008	227.361	66.7748	68.6506	4.79307	6.44712	6.40642	25.5914	28.498	27.4489	12.1461	10.8557	27.3256	313.221	622.896	651.751	404.459	335.358	368.825	465.046	397.653	383.626	109.618	113.284	108.813	349.924	354.313	346.485	61.2216	56.5372	64.9499	BraA01g037470.3C	protein_coding	chrA01:25506147-25506658:+	gi|685265875|ref|XP_009117127.1|	328	1e-37	PREDICTED: auxin-repressed 12.5 kDa protein-like [Brassica rapa]	gi|685265874|ref|XM_009118879.1|	264	4e-135	PREDICTED: Brassica rapa auxin-repressed 12.5 kDa protein-like (LOC103842251), mRNA	.
	BraA03g017900.3C	920.933	1276.96	994.483	148.441	141.741	155.993	41.2547	45.638	35.7381	142.624	144.005	140.737	44.4352	49.4663	55.6652	151.616	144.245	139.72	364.358	364.601	372.502	81.4909	65.0499	62.3019	137.128	90.7352	79.3008	233.795	262.198	247.719	104.653	120.487	104.538	31.847	27.9101	55.5377	BraA03g017900.3C	protein_coding	chrA03:8328734-8329269:-	gi|685284109|ref|XP_009132955.1|	569	1e-73	PREDICTED: auxin-repressed 12.5 kDa protein-like isoform X1 [Brassica rapa]	gi|685284108|ref|XM_009134707.1|	327	4e-170	PREDICTED: Brassica rapa auxin-repressed 12.5 kDa protein-like (LOC103857509), transcript variant X1, mRNA	P93017
	BraA05g011140.3C	228.103	300.222	237.527	15.7306	13.8439	16.0235	11.3315	10.9394	9.47575	59.1399	57.7853	54.9479	11.9972	15.9642	12.5142	41.4906	44.5957	35.3418	177.28	71.0179	77.4101	13.2747	18.3353	12.9456	44.1017	19.8316	21.2681	162.372	164.544	170.669	49.6368	53.2192	45.8606	7.19979	13.204	22.4777	BraA05g011140.3C	protein_coding	chrA05:5963090-5963652:+	gi|685306197|ref|XP_009143828.1|	477	1e-59	PREDICTED: auxin-repressed 12.5 kDa protein [Brassica rapa]	gi|685306196|ref|XM_009145580.1|	324	2e-168	PREDICTED: Brassica rapa auxin-repressed 12.5 kDa protein (LOC103867506), mRNA	P93017
GH3(11)	BraA01g018010.3C	5.76836	13.7132	6.03393	5.19098	5.04071	5.60133	2.27498	2.68812	1.99259	4.52164	5.29606	3.77554	2.21435	2.76147	1.97023	4.15794	4.67523	3.1133	6.04366	5.21741	5.2648	4.06743	4.53293	4.88742	7.15654	5.70342	5.7685	3.05332	3.00505	3.42439	11.4907	10.3845	9.43427	1.94802	1.91275	3.05786	BraA01g018010.3C	protein_coding	chrA01:9589366-9591863:+	gi|685261011|ref|XP_009143243.1|	3278	0	PREDICTED: indole-3-acetic acid-amido synthetase GH3.5 [Brassica rapa]	gi|685261010|ref|XM_009144995.1|	1839	0	PREDICTED: Brassica rapa indole-3-acetic acid-amido synthetase GH3.5 (LOC103866974), mRNA	O81829
	BraA02g013860.3C	2.28828	1.39931	2.09241	3.21137	3.57728	3.31598	2.04284	2.48524	1.83102	6.48757	6.73576	6.38937	29.1892	25.7738	28.4276	30.7151	31.2331	29.2651	3.5295	2.31885	2.30648	6.55873	7.9196	8.20001	3.98722	5.1896	4.83174	3.8049	3.71212	3.79967	11.5924	13.0058	11.8629	8.47162	8.68493	14.4872	BraA02g013860.3C	protein_coding	chrA02:7064752-7066957:+	gi|685272049|ref|XP_009127083.1|	3286	0	PREDICTED: indole-3-acetic acid-amido synthetase GH3.6 [Brassica rapa]	gi|685272048|ref|XM_009128835.1|	1839	0	PREDICTED: Brassica rapa indole-3-acetic acid-amido synthetase GH3.6 (LOC103851955), mRNA	Q9LSQ4
	BraA03g013900.3C	1.24762	1.45545	0.881646	12.9741	10.7478	10.9154	5.23411	5.87102	6.66751	4.25451	4.39924	4.04395	28.7223	23.009	26.0645	27.4741	27.1245	36.8529	3.21201	3.50112	2.92727	12.743	16.153	16.0158	9.67334	9.72329	9.42918	1.22935	1.42343	1.65261	10.0309	9.64084	9.44923	16.5073	17.7441	14.0274	BraA03g013900.3C	protein_coding	chrA03:6101715-6103839:+	gi|685283036|ref|XP_009132438.1|	3260	0	PREDICTED: indole-3-acetic acid-amido synthetase GH3.6-like [Brassica rapa]	gi|685283035|ref|XM_009134190.1|	1827	0	PREDICTED: Brassica rapa indole-3-acetic acid-amido synthetase GH3.6-like (LOC103857039), mRNA	Q9LSQ4
	BraA03g024150.3C(JAR)	301.569	40.8889	299.218	218.621	216.338	219.514	218.099	236.645	230.231	95.3789	99.0761	94.0377	335.939	344.231	342.638	109.129	104.358	99.2133	148.242	143.465	154.584	210.039	314.866	315.582	538.385	386.453	383.295	42.7202	42.155	40.7245	419.978	425.308	430.584	182.02	196.377	214.36	BraA03g024150.3C	protein_coding	chrA03:11886735-11888866:+	gi|685285724|ref|XP_009133775.1|	3113	0	PREDICTED: jasmonic acid-amido synthetase JAR1 [Brassica rapa]	gi|685285723|ref|XM_009135527.1|	1737	0	PREDICTED: Brassica rapa jasmonic acid-amido synthetase JAR1 (LOC103858212), mRNA	Q9SKE2
	BraA03g057960.3C	6.81707	5.2477	6.29326	5.50435	5.01514	4.75876	25.7267	27.0912	24.9716	14.1596	16.3273	17.2534	5.50325	4.73175	6.80673	0.775659	2.04825	1.70222	9.81159	11.9369	11.2823	12.3491	10.2446	8.85036	8.59978	7.13145	7.41319	12.7923	12.267	13.6626	13.2581	15.0532	14.0448	6.04952	6.25096	5.32355	BraA03g057960.3C	protein_coding	chrA03:30492428-30494690:-	gi|923897885|ref|XP_013719534.1|	3057	0	PREDICTED: 4-substituted benzoates-glutamate ligase GH3.12-like [Brassica napus]	gi|923897884|ref|XM_013864080.1|	1632	0	PREDICTED: Brassica napus 4-substituted benzoates-glutamate ligase GH3.12-like (LOC106423295), mRNA	Q9LYU4
	BraA09g010220.3C	6.42811	20.755	8.27743	3.4678	3.48557	3.53238	10.45	11.784	10.8924	29.7201	26.5594	29.1698	1.93138	1.80343	1.8976	1.59988	2.15523	3.81045	40.4202	21.7467	23.1433	8.12127	6.21484	4.84405	5.037	6.82174	6.29007	33.2776	32.2234	30.2152	6.17018	5.59468	6.53979	6.06161	6.27358	7.1233	BraA09g010220.3C	protein_coding	chrA09:5885146-5887133:-	gi|685381285|ref|XP_009123229.1|	3161	0	PREDICTED: probable indole-3-acetic acid-amido synthetase GH3.1 [Brassica rapa]	gi|685381284|ref|XM_009124981.1|	1773	0	PREDICTED: Brassica rapa probable indole-3-acetic acid-amido synthetase GH3.1 (LOC103847985), mRNA	O82333
	BraA09g061810.3C	0.459003	0.0997996	0.208231	0.470623	0.521864	0.479387	0.149008	0.542598	0.403291	1.94543	2.42033	1.70885	4.14563	4.48608	3.41258	0.215235	0.486267	0.199838	0.93104	1.44709	0.536412	1.4142	0.445918	0.464765	1.74997	2.03385	2.16255	1.55785	1.98563	1.30479	1.68619	1.56395	1.29908	0.533118	0.497743	0.268141	BraA09g061810.3C	protein_coding	chrA09:43043729-43045811:+	gi|674898075|emb|CDY34882.1|	3048	0	BnaA09g48080D [Brassica napus]	gi|685368691|ref|XM_009119996.1|	1705	0	PREDICTED: Brassica rapa 4-substituted benzoates-glutamate ligase GH3.12-like (LOC103843291), transcript variant X1, mRNA	Q9LYU4
	BraA09g061830.3C	9.05868	2.9544	9.19424	3.91985	4.24772	4.13717	9.66959	9.25648	8.5566	5.85673	5.52001	6.33969	6.05112	5.65469	6.09365	0.935953	0.34855	1.33692	3.01053	3.0599	4.52164	2.89288	1.90179	1.57408	4.17074	3.53034	4.39319	1.86588	2.94143	2.21583	2.89294	2.65179	2.60726	2.13994	2.33094	2.04501	BraA09g061830.3C	protein_coding	chrA09:43055184-43057173:+	gi|685368702|ref|XP_009118248.1|	3033	0	PREDICTED: 4-substituted benzoates-glutamate ligase GH3.12-like [Brassica rapa]	gi|685368701|ref|XM_009120000.1|	1713	0	PREDICTED: Brassica rapa 4-substituted benzoates-glutamate ligase GH3.12-like (LOC103843294), mRNA	Q9LYU4
	BraA10g012800.3C	0.415989	0.305259	0.371536	1.58345	1.35976	0.879787	1.16475	0.442575	0.704889	2.35877	2.18728	2.05908	2.4153	2.78895	3.22354	0.146299	0.0708263	0.339583	2.58411	2.21312	2.73455	1.60825	0.909292	1.00696	1.89574	2.35389	2.04355	3.27916	2.36191	3.01881	2.66198	2.36435	2.0377	0.24707	0.394711	0.382745	BraA10g012800.3C	protein_coding	chrA10:10533010-10535110:-	gi|685373030|ref|XP_009120003.1|	2999	0	PREDICTED: 4-substituted benzoates-glutamate ligase GH3.12-like [Brassica rapa]	gi|685373029|ref|XM_009121755.1|	1686	0	PREDICTED: Brassica rapa 4-substituted benzoates-glutamate ligase GH3.12-like (LOC103844927), mRNA	Q9LYU4
	BraA04g032040.3C(JAR)	17.4626	4.53297	18.1884	16.3491	16.0917	16.8929	13.9823	11.3206	13.1129	10.7075	9.82917	11.2691	21.552	17.5308	19.1373	5.22826	6.10242	3.32484	4.18238	4.69485	4.81929	4.0723	3.67242	3.1317	4.25813	4.11549	4.47553	3.5116	3.72836	3.80735	6.40721	4.62983	5.73593	2.032	2.04271	2.03432	BraA04g032040.3C	protein_coding	chrA04:21599502-21601390:+	gi|685303421|ref|XP_009142414.1|	3079	0	PREDICTED: jasmonic acid-amido synthetase JAR1-like [Brassica rapa]	gi|685303420|ref|XM_009144166.1|	1722	0	PREDICTED: Brassica rapa jasmonic acid-amido synthetase JAR1-like (LOC103866275), mRNA	Q9SKE2
	BraA10g025440.3C	34.0872	23.2624	32.093	12.1727	12.1664	12.5091	37.4799	42.2687	40.1774	41.0397	39.1158	40.221	27.5636	26.7563	26.8798	7.82785	8.16229	19.3641	21.1926	23.7382	24.7201	12.4501	10.6321	13.1648	16.3979	23.0253	21.9731	17.4841	15.8714	15.7753	20.5015	21.3142	20.2048	23.2223	23.9677	26.0235	BraA10g025440.3C	protein_coding	chrA10:17113087-17119301:-	gi|685377887|ref|XP_009121771.1|	2896	0	PREDICTED: 4-substituted benzoates-glutamate ligase GH3.12 [Brassica rapa]	gi|685377889|ref|XM_009123525.1|	1606	0	PREDICTED: Brassica rapa 4-substituted benzoates-glutamate ligase GH3.12 (LOC103846581), transcript variant X2, mRNA	Q9LYU4
SAUR (26)	BraA01g003510.3C	0.314228	0.307447	0.962227	2.31972	2.14357	2.06755	1.22411	1.33724	0.354971	3.23956	2.0335	1.91431	4.64407	5.73025	7.4209	23.8703	24.8243	7.79799	2.54952	0.955279	2.31349	4.69176	4.80801	6.08505	5.0541	5.41888	3.24979	1.54812	1.74772	1.85519	15.7512	11.6296	13.8531	14.9304	12.9485	15.8601	BraA01g003510.3C	protein_coding	chrA01:1737717-1737995:-	gi|685256844|ref|XP_009108765.1|	480	2e-60	PREDICTED: auxin-induced protein 15A [Brassica rapa]	gi|685256843|ref|XM_009110517.1|	279	2e-143	PREDICTED: Brassica rapa auxin-induced protein 15A (LOC103834414), mRNA	P33079
	BraA01g003530.3C	0	0	0	0	0	0	0	0	0	0	0	0	0.587618	1.79131	0.821599	1.95762	1.51636	0.363515	0	0	0	1.1873	0	0	0	0.299974	0	0	0	0	6.82712	4.70879	6.81661	1.05793	1.50903	0.585314	BraA01g003530.3C	protein_coding	chrA01:1744623-1744937:-	gi|685256848|ref|XP_009108953.1|	551	5e-71	PREDICTED: auxin-induced protein 15A [Brassica rapa]	gi|923923830|ref|XM_013875577.1|	315	2e-163	PREDICTED: Brassica napus auxin-induced protein 15A-like (LOC106434720), mRNA	P33081
	BraA01g003540.3C	0	0	0	2.9963	4.92227	2.03473	3.4258	4.0303	5.80772	4.74235	2.33476	7.14322	3.42777	3.77335	4.5264	11.8001	10.6882	9.54228	4.93969	2.1936	1.70758	5.77161	10.942	12.3292	3.48172	3.79134	2.23874	3.19946	6.27075	6.12385	13.275	10.8727	12.9894	5.91411	5.28161	6.82866	BraA01g003540.3C	protein_coding	chrA01:1756341-1756664:+	gi|685256850|ref|XP_009109058.1|	570	9e-74	PREDICTED: auxin-induced protein 15A [Brassica rapa]	gi|923923823|ref|XM_013875574.1|	324	2e-168	PREDICTED: Brassica napus auxin-induced protein 15A-like (LOC106434717), mRNA	O65695
	BraA01g003550.3C	0	0.595679	0.621438	1.68542	1.38439	1.90756	1.58114	1.72727	1.37551	0.627664	2.84549	1.03027	3.85624	3.70079	3.19511	14.5598	11.6096	5.83139	6.79207	3.2904	5.12273	8.00811	20.1836	18.2626	8.48668	6.12447	6.50634	5.59905	5.0793	6.78949	14.9343	18.455	14.7125	15.8138	14.3044	19.6324	BraA01g003550.3C	protein_coding	chrA01:1762290-1762721:-	gi|685256852|ref|XP_009109163.1|	753	2e-100	PREDICTED: uncharacterized protein LOC103834796 [Brassica rapa]	gi|923923828|ref|XM_013875576.1|	432	0	PREDICTED: Brassica napus auxin-responsive protein SAUR72-like (LOC106434719), mRNA	O65695
	BraA01g006580.3C	0.160567	0	0	1.92619	1.2779	2.41485	0	0.512487	0.181386	0.993227	0.692731	0.652128	0.847525	0.516723	0.79	0.225879	0.218706	0.20972	1.95416	0.325425	0.675525	4.45238	1.5794	3.65811	1.03304	1.38449	0.996363	0.949289	1.3396	1.89597	5.13747	4.2447	4.8765	0.457757	0.522357	0.675362	BraA01g006580.3C	protein_coding	chrA01:3153839-3154384:+	gi|685257648|ref|XP_009127095.1|	911	4e-123	PREDICTED: uncharacterized protein LOC103851967 [Brassica rapa]	gi|685257647|ref|XM_009128847.1|	546	0	PREDICTED: Brassica rapa uncharacterized LOC103851967 (LOC103851967), mRNA	Q9FJF9
	BraA01g013230.3C	31.2198	30.7237	34.8314	7.70477	6.60379	6.82457	26.1624	22.9802	24.1953	48.8408	43.6571	49.2073	24.1434	29.2061	21.9689	11.4903	10.3838	7.82348	14.5429	10.6683	8.2091	5.61388	3.96756	3.51497	9.14761	9.78176	7.3211	33.2664	29.4452	22.8615	17.0355	15.5467	19.0272	12.9366	10.8257	12.2152	BraA01g013230.3C	protein_coding	chrA01:6925727-6926209:+	gi|685259544|ref|XP_009136028.1|	835	2e-112	PREDICTED: indole-3-acetic acid-induced protein ARG7 [Brassica rapa]	gi|923737117|ref|XM_013814646.1|	483	0	PREDICTED: Brassica napus auxin-responsive protein SAUR36-like (LOC106374674), mRNA	O22150
	BraA01g038610.3C	0.218084	1.28027	0.890419	1.20746	0.743851	0.409984	1.27435	0.464043	1.47816	4.4967	2.35218	2.43575	0	0.233939	0.429194	0.30679	0.594096	0	13.9343	5.52493	5.27565	8.14055	18.1146	18.6318	5.37847	3.0557	3.38317	10.3147	8.49078	6.2232	8.6059	9.68553	6.40965	4.35211	4.02033	9.17283	BraA01g038610.3C	protein_coding	chrA01:26160515-26160916:+	gi|685385427|ref|XP_009124678.1|	637	4e-83	PREDICTED: auxin-induced protein 15A-like [Brassica rapa]	gi|923738359|ref|XM_013814978.1|	402	0	PREDICTED: Brassica napus auxin-responsive protein SAUR72 (LOC106375083), mRNA	Q9LTV3
	BraA02g003720.3C	3.77715	4.27916	3.04378	3.1186	5.87659	7.66139	3.48496	5.07606	4.04232	5.53369	3.21625	5.85363	7.55508	5.97102	7.2379	8.11012	7.85257	6.49135	8.87127	8.86395	8.15455	9.11679	6.0836	5.20845	5.32916	4.28534	5.13997	2.54651	3.86995	2.34739	6.5727	5.04513	7.98517	2.4559	2.58691	2.71753	BraA02g003720.3C	protein_coding	chrA02:1799033-1799473:+	gi|685268369|ref|XP_009125262.1|	763	8e-102	PREDICTED: uncharacterized protein LOC103850290 [Brassica rapa]	gi|923524461|ref|XM_013823535.1|	441	0	PREDICTED: Brassica napus auxin-responsive protein SAUR71-like (LOC106383426), mRNA	O65695
	BraA02g020990.3C	13.8686	2.18079	14.6617	4.79916	6.47612	7.21641	4.10024	4.4792	3.63695	4.08514	4.2738	6.78932	8.10464	6.37583	9.5041	0	0	1.29387	5.02341	4.01541	4.6886	3.69774	1.62401	3.66741	5.31109	6.40622	6.40318	1.70818	1.60701	2.43691	3.43369	1.57126	2.9115	0.235344	0	0	BraA02g020990.3C	protein_coding	chrA02:12252767-12253120:-	gi|685273786|ref|XP_009127933.1|	525	1e-66	PREDICTED: uncharacterized protein LOC103852781 [Brassica rapa]	gi|685273785|ref|XM_009129685.1|	354	0	PREDICTED: Brassica rapa uncharacterized LOC103852781 (LOC103852781), mRNA	Q9C9E1
	BraA03g015870.3C	2.15853	0.649832	2.20328	1.99186	3.20926	2.18503	1.77878	1.94318	1.12542	0.513543	1.07452	1.51731	3.50567	4.27471	3.5945	6.07306	3.39242	6.5061	3.53637	2.18737	1.92102	3.01042	2.90354	3.78282	2.13651	3.57923	1.5455	1.9633	3.07837	0.980301	4.073	4.74056	5.85609	28.7173	26.8282	18.158	BraA03g015870.3C	protein_coding	chrA03:7264922-7265449:-	gi|685283570|ref|XP_009132695.1|	653	3e-84	PREDICTED: uncharacterized protein LOC103857272 [Brassica rapa]	gi|685283569|ref|XM_009134447.1|	528	0	PREDICTED: Brassica rapa uncharacterized LOC103857272 (LOC103857272), mRNA	Q9SGU2
	BraA03g018910.3C	3.6529	2.45718	3.96167	6.95235	4.93188	7.94023	3.55756	2.67187	3.0949	5.64898	3.44742	2.0863	13.9789	12.2453	14.8273	9.95631	6.84138	15.208	4.8625	3.47035	4.56243	5.35677	6.73711	6.24165	13.2196	7.62824	10.153	2.69954	2.11638	3.36978	16.8011	13.0365	13.1965	2.38654	4.20878	6.72196	BraA03g018910.3C	protein_coding	chrA03:8886175-8886558:-	gi|685284341|ref|XP_009133069.1|	641	8e-84	PREDICTED: auxin-induced protein 15A-like [Brassica rapa]	gi|685284340|ref|XM_009134821.1|	384	0	PREDICTED: Brassica rapa auxin-induced protein 15A-like (LOC103857611), mRNA	O65695
	BraA03g023650.3C	2.34507	1.23548	2.39369	4.16153	2.66623	3.56078	0.527046	0	0	0	0	0.18316	0.761727	0.38701	0.88753	0.253765	0.245706	0	2.19542	2.742	3.98435	4.04013	3.15446	2.87681	2.708	1.36099	2.23874	0.355495	0.33444	0.355006	3.84781	3.62424	5.12508	0.171424	1.17369	0	BraA03g023650.3C	protein_coding	chrA03:11356457-11356942:+	gi|685285611|ref|XP_009133717.1|	844	2e-113	PREDICTED: uncharacterized protein LOC103858166 [Brassica rapa]	gi|685285610|ref|XM_009135469.1|	486	0	PREDICTED: Brassica rapa uncharacterized LOC103858166 (LOC103858166), mRNA	O22150
	BraA05g009190.3C	12.0462	2.18264	13.8899	20.1736	19.5294	21.8074	14.5561	11.1547	16.1281	3.90972	2.40605	1.58552	32.0274	39.4839	34.9023	29.8125	28.2581	28.8454	2.4887	10.8508	12.2007	12.6094	15.6037	14.4844	23.681	17.3115	17.7647	3.29715	1.86112	2.63409	33.0706	23.5889	21.6362	5.51172	5.08002	6.33345	BraA05g009190.3C	protein_coding	chrA05:4884041-4884433:+	gi|685305752|ref|XP_009143607.1|	656	5e-86	PREDICTED: auxin-induced protein 15A-like [Brassica rapa]	gi|685305751|ref|XM_009145359.1|	393	0	PREDICTED: Brassica rapa auxin-induced protein 15A-like (LOC103867306), mRNA	O65695
	BraA05g034250.3C	26.5865	30.7424	26.0163	50.892	48.9636	53.9051	36.3781	49.5584	44.4301	39.4154	40.7617	47.9658	14.1492	12.7277	12.5402	17.3094	17.059	33.0034	32.7579	44.3091	35.5895	49.4449	61.9567	57.5671	17.6704	23.2085	20.2244	32.9087	31.3669	26.8096	20.1533	19.5167	18.7277	16.4953	16.2022	23.7976	BraA05g034250.3C	protein_coding	chrA05:24479427-24479825:+	gi|685312034|ref|XP_009146579.1|	562	8e-72	PREDICTED: auxin-induced protein X15 [Brassica rapa]	gi|923628872|ref|XM_013894460.1|	399	0	PREDICTED: Brassica napus auxin-responsive protein SAUR72-like (LOC106452367), mRNA	Q9LTV3
	BraA05g036760.3C	4.1015	7.27355	4.18653	2.3655	2.04015	3.61433	6.24134	4.09091	5.50205	9.24979	7.46509	8.06866	1.62368	0.549962	0.504491	0.721227	4.88826	5.35707	4.41972	5.19538	2.15694	4.64766	9.8058	9.92823	1.92411	1.10517	1.06046	5.55695	5.22782	7.56723	1.64038	0.271065	1.25569	2.43602	0.833938	1.34776	BraA05g036760.3C	protein_coding	chrA05:25536883-25537224:+	gi|685312645|ref|XP_009146892.1|	485	1e-60	PREDICTED: uncharacterized protein LOC103870512 [Brassica rapa]	gi|685312644|ref|XM_009148644.1|	342	2e-178	PREDICTED: Brassica rapa uncharacterized LOC103870512 (LOC103870512), mRNA	.
	BraA06g012490.3C	94.475	29.9635	106.853	96.2305	97.4003	91.4376	58.8703	63.0336	57.8846	14.8576	17.0549	19.7135	23.877	26.1948	25.2107	65.0438	62.4329	79.214	59.0732	83.7701	90.7355	102.466	92.0978	94.1662	72.5437	53.7179	49.2677	7.69184	6.30854	7.87822	86.8842	83.8149	93.3408	27.2	32.7749	43.7783	BraA06g012490.3C	protein_coding	chrA06:6645985-6646422:-	gi|923619462|ref|XP_013746933.1|	643	1e-83	PREDICTED: auxin-responsive protein SAUR41 [Brassica napus]	gi|685316978|ref|XM_009150837.1|	432	0	PREDICTED: Brassica rapa auxin-induced protein 15A (LOC103872443), mRNA	Q9SA49
	BraA07g016220.3C	0.584464	0.190617	0	8.80912	7.30957	6.77566	0.379473	0.414545	1.54057	1.60682	2.10128	1.38469	15.2193	15.4649	16.1033	69.3387	74.3016	22.9015	3.35899	1.38197	0.614728	9.35001	10.4334	14.2032	4.59586	2.3098	1.81338	1.72771	2.34777	1.72533	28.4661	23.2791	32.2562	4.4433	4.01402	13.111	BraA07g016220.3C	protein_coding	chrA07:14302739-14303188:+	gi|923674342|ref|XP_013651669.1|	683	1e-89	PREDICTED: auxin-responsive protein SAUR22-like [Brassica napus]	gi|923674341|ref|XM_013796215.1|	450	0	PREDICTED: Brassica napus auxin-responsive protein SAUR22-like (LOC106356457), mRNA	O65695
	BraA07g027690.3C	13.6732	19.1492	10.3991	9.89604	8.23013	11.3404	4.961	5.70475	4.84584	2.21122	4.33751	5.71659	3.1133	4.02633	2.63816	3.77155	0.365178	2.10105	14.4112	26.0817	22.2768	17.156	16.409	18.3241	13.5116	12.7145	7.20916	3.43428	2.98234	4.22099	7.72034	10.4895	3.93987	6.11463	7.559	5.92026	BraA07g027690.3C	protein_coding	chrA07:20828249-20828575:-	gi|685334317|ref|XP_009104700.1|	483	2e-60	PREDICTED: auxin-induced protein 15A-like [Brassica rapa]	gi|685334316|ref|XM_009106452.1|	327	4e-170	PREDICTED: Brassica rapa auxin-induced protein 15A-like (LOC103830643), mRNA	O65695
	BraA07g029140.3C	15.7167	10.572	11.5305	23.1143	21.2195	18.9281	18.1765	13.3247	17.7545	12.9119	11.3893	11.9685	58.8482	55.3197	55.3371	98.802	98.0058	35.9239	17.1851	9.45646	11.3647	22.7857	17.714	19.5816	21.3292	10.0579	9.39707	11.1309	15.4798	13.532	47.9295	40.2498	38.2532	15.1688	19.7062	16.2683	BraA07g029140.3C	protein_coding	chrA07:21545233-21545589:+	gi|685334759|ref|XP_009104858.1|	507	8e-64	PREDICTED: uncharacterized protein LOC103830792 [Brassica rapa]	gi|685334758|ref|XM_009106610.1|	357	0	PREDICTED: Brassica rapa uncharacterized LOC103830792 (LOC103830792), mRNA	Q9C9E1
	BraA07g036830.3C	5.40261	5.04575	6.01594	15.1829	15.9147	18.9281	9.56655	10.1895	13.3159	14.9374	15.6272	12.9658	34.9978	30.821	33.1056	22.8005	17.728	16.6789	7.96991	5.9725	4.90749	12.0476	9.66219	11.1895	19.2226	10.5873	12.6987	31.9408	33.6913	35.0382	20.6909	19.7354	17.8034	31.7378	36.2167	20.3999	BraA07g036830.3C	protein_coding	chrA07:25727765-25728121:-	gi|923667580|ref|XP_013649551.1|	506	1e-63	PREDICTED: uncharacterized protein LOC106354215 [Brassica napus]	gi|923667579|ref|XM_013794097.1|	357	0	PREDICTED: Brassica napus uncharacterized LOC106354215 (LOC106354215), mRNA	Q9C9E1
	BraA07g039130.3C	2.00159	1.9584	3.26893	10.7128	12.0612	11.4767	9.16194	9.15691	11.5317	4.74617	4.96536	5.48726	16.9041	16.9622	16.3476	36.3231	37.3507	17.7774	7.30803	5.27366	7.57883	13.2352	10.7192	9.80423	10.0874	9.06085	4.34715	2.36672	4.26754	4.52997	8.96593	7.83119	6.07892	4.75524	3.03873	5.26181	BraA07g039130.3C	protein_coding	chrA07:26818098-26818535:-	gi|685338335|ref|XP_009106211.1|	759	3e-101	PREDICTED: uncharacterized protein LOC103832008 [Brassica rapa]	gi|685338334|ref|XM_009107963.1|	438	0	PREDICTED: Brassica rapa uncharacterized LOC103832008 (LOC103832008), mRNA	O65695
	BraA08g015020.3C	0.182645	0	0	0	0.207658	0.171681	0	0.194318	0.206327	1.50639	0.590986	0.927245	0	0	0.539175	2.0555	0.746333	0.954228	2.96381	2.03594	1.53682	2.3375	2.1958	1.45638	1.95847	2.55915	2.83341	4.67921	6.09517	5.7511	7.01264	5.21462	4.4734	3.64489	4.15927	2.88084	BraA08g015020.3C	protein_coding	chrA08:12418720-12419199:+	gi|685344701|ref|XP_009108573.1|	833	6e-112	PREDICTED: indole-3-acetic acid-induced protein ARG7-like [Brassica rapa]	gi|685344700|ref|XM_009110325.1|	480	0	PREDICTED: Brassica rapa indole-3-acetic acid-induced protein ARG7-like (LOC103834255), mRNA	O22150
	BraA08g020500.3C	3.61811	3.54003	4.82946	1.0273	0	0.261609	3.52368	1.48052	2.51522	9.18183	11.407	12.7165	2.05666	3.28406	3.83413	1.56609	0.758179	2.90812	1.12907	0.846104	0.878182	1.48413	0.30418	0.634072	1.19373	0.899922	1.15135	7.95294	5.93392	7.12041	0.593663	0.882898	0.272664	0.528964	0.301806	0.877971	BraA08g020500.3C	protein_coding	chrA08:15700041-15700355:-	gi|685346469|ref|XP_009109257.1|	558	4e-72	PREDICTED: auxin-induced protein 15A-like [Brassica rapa]	gi|685346468|ref|XM_009111009.1|	315	2e-163	PREDICTED: Brassica rapa auxin-induced protein 15A-like (LOC103834917), mRNA	O65695
	BraA08g028080.3C	0	0.77803	0.811674	6.60409	6.32863	9.90375	0.968044	1.05751	1.12287	2.25447	1.71533	2.22034	9.02413	10.6625	10.3678	30.4829	27.6194	8.82823	2.41944	0.805813	0.209091	6.9966	8.69086	4.982	3.41066	1.2856	1.02799	1.56708	1.28998	1.56492	8.90494	9.45963	7.59565	4.34506	2.58691	5.01698	BraA08g028080.3C	protein_coding	chrA08:19676161-19676601:+	gi|923520128|ref|XP_013665433.1|	685	6e-90	PREDICTED: auxin-responsive protein SAUR36-like [Brassica napus]	gi|923520127|ref|XM_013809979.1|	438	0	PREDICTED: Brassica napus auxin-responsive protein SAUR36-like (LOC106369880), mRNA	P33083
	BraA09g026350.3C	0.726042	0.177594	0.185273	1.17247	1.03184	1.02369	1.59096	1.35178	1.64036	1.68417	0.783087	0.921486	0.766458	0.778828	1.78609	1.02136	1.48339	0.47415	2.02496	2.75903	2.67273	5.61388	1.7854	2.06763	2.53019	3.9127	3.37897	3.57703	2.35562	2.14327	6.58191	7.10157	6.75733	3.44977	1.57464	3.6264	BraA09g026350.3C	protein_coding	chrA09:17781885-17782367:+	gi|685360220|ref|XP_009114622.1|	837	1e-112	PREDICTED: uncharacterized protein LOC103839891 [Brassica rapa]	gi|685360219|ref|XM_009116374.1|	483	0	PREDICTED: Brassica rapa uncharacterized LOC103839891 (LOC103839891), mRNA	O22150
	BraA10g011930.3C	154.147	294.22	153.471	76.783	76.8494	75.9064	274.828	297.143	329.871	271.151	281.267	272.256	189.809	198.377	211.609	183.896	183.83	170.741	337.332	198.705	194.507	122.526	148.235	153.23	119.123	173.355	167.726	537.655	580.876	552.281	148.223	144.6	147.957	414.227	478.248	326.056	BraA10g011930.3C	protein_coding	chrA10:9871266-9871658:+	gi|685372741|ref|XP_009119910.1|	396	9e-47	PREDICTED: indole-3-acetic acid-induced protein ARG7-like [Brassica rapa]	gi|923726894|ref|XM_013811330.1|	393	0	PREDICTED: Brassica napus auxin-responsive protein SAUR32-like (LOC106371281), mRNA	Q9ZUZ3
[truncated: 15 more columns]

## Sheet: PR(27)
The FPKM and annotation of pathogenesis-related genes involving clubroot resistances.
	name	DH199S0d1	DH199S0d2	DH199S0d3	DH199S2d1	DH199S2d2	DH199S2d3	DH199S5d1	DH199S5d2	DH199S5d3	DH199S8d1	DH199S8d2	DH199S8d3	DH199S13d1	DH199S13d2	DH199S13d3	DH199S22d1	DH199S22d2	DH199S22d3	DH40R0d1	DH40R0d2	DH40R0d3	DH40R2d1	DH40R2d2	DH40R2d3	DH40R5d1	DH40R5d2	DH40R5d3	DH40R8d1	DH40R8d2	DH40R8d3	DH40R13d1	DH40R13d2	DH40R13d3	DH40R22d1	DH40R22d2	DH40R22d3	GeneName	Biotype	Position	NR:Seq-id	NR:Score	NR:Evalue	NR:Description	NT:Seq-id	NT:Score	NT:Evalue	NT:Description	Uniprot:UniProtKB-AC
PR1	BraA01g004410.3C	6340.6	1491.88	6361.25	1816.78	1772.52	1781.08	4927.08	5325.78	5340.63	9269.23	9403	8837.97	9284.95	10143.6	10574	87.8578	112.817	269.365	4451.31	6401.62	6762.36	5191.12	2404.91	2424.56	2521.16	3084.39	3138.7	9506.5	9032.92	9251.22	9133.26	9083.97	8493.71	404.975	417.941	318.177	BraA01g004410.3C	protein_coding	chrA01:2140451-2140975:-	gi|685257084|ref|XP_009119957.1|	937	2e-127	PREDICTED: pathogenesis-related protein 1 [Brassica rapa]	gi|685257083|ref|XM_009121709.1|	525	0	PREDICTED: Brassica rapa pathogenesis-related protein 1 (LOC103844852), mRNA	Q9ZNS4
PR	BraA01g013690.3C	0.125962	0	0	0	0	0	0.245349	0	0	0.779169	1.35859	1.15106	0.664869	0.40536	0.743689	0.354396	0.171571	0	7.28178	0.51058	0.397453	5.37357	2.47802	3.87413	0.540266	0.135764	0	16.2593	11.9101	20.699	1.88079	2.13113	3.20851	5.26684	4.91736	42.7822	BraA01g013690.3C	protein_coding	chrA01:7252533-7253551:+	gi|685259686|ref|XP_009136680.1|	1231	4e-170	PREDICTED: thaumatin-like protein 1 [Brassica rapa]	gi|685259685|ref|XM_009138432.1|	696	0	PREDICTED: Brassica rapa thaumatin-like protein 1 (LOC103860762), mRNA	P13046
PR	BraA02g012130.3C	8.57026	0.962251	9.89521	1.42612	1.43763	1.45268	1.36829	1.34528	2.38069	20.2784	17.8811	17.9743	7.41585	7.23412	6.49775	0	0	0	3.27729	4.2712	2.36434	1.94792	0.460657	1.1203	5.27279	4.84573	3.19667	10.7982	9.1167	9.40083	15.5836	12.3309	15.1407	0.133513	0.152354	0.147735	BraA02g012130.3C	protein_coding	chrA02:5903166-5904219:-	gi|685271564|ref|XP_009126825.1|	992	1e-134	PREDICTED: pathogenesis-related protein PR-1-like [Brassica rapa]	gi|685271563|ref|XM_009128577.1|	624	0	PREDICTED: Brassica rapa pathogenesis-related protein PR-1-like (LOC103851699), mRNA	Q40374
PR5	BraA02g022580.3C	3.06372	2.19056	3.96918	2.82715	3.88522	3.87666	26.3948	33.5982	28.3533	16.8862	17.4118	19.861	11.0711	7.33135	13.9142	2.15496	2.88903	4.15551	9.68019	5.97049	9.17134	22.8723	15.8407	17.8525	10.2346	9.14436	5.84962	9.86929	9.94014	9.73976	27.3971	22.8023	25.8591	7.7265	6.51682	9.41695	BraA02g022580.3C	protein_coding	chrA02:13186767-13187602:+	gi|685274072|ref|XP_009128072.1|	1294	4e-179	PREDICTED: pathogenesis-related protein 5-like [Brassica rapa]	gi|685274071|ref|XM_009129824.1|	744	0	PREDICTED: Brassica rapa pathogenesis-related protein 5-like (LOC103852929), mRNA	P28493
PR	BraA03g012330.3C	4.11394	1.11039	6.95045	1.04725	0.967728	1.73347	0.828947	0.150927	0.961523	11.2614	11.7815	10.5148	5.54101	6.69566	5.3045	0.199563	0.193225	0	3.16524	2.44384	2.23809	2.57201	0.46513	0	5.01976	3.51668	5.13498	5.03216	5.78613	6.8399	16.3401	17.1008	15.9826	0.134809	0	0	BraA03g012330.3C	protein_coding	chrA03:5281558-5282590:-	gi|685282410|ref|XP_009132116.1|	933	1e-125	PREDICTED: pathogenesis-related protein PR-1-like [Brassica rapa]	gi|685282409|ref|XM_009133868.1|	618	0	PREDICTED: Brassica rapa pathogenesis-related protein PR-1-like (LOC103856742), mRNA	Q40374
PR	BraA03g031830.3C	0.414513	1.41949	0.63466	0.382506	0.706922	0	0.403695	0.882011	0.936519	13.034	7.82393	12.2054	59.0743	52.6911	63.4263	11.3708	9.88053	19.4906	2.73259	2.10026	0.871954	2.87352	5.43641	3.30527	2.22237	1.11692	1.71478	14.4997	15.9464	17.7427	5.30507	4.8215	4.46705	35.8458	35.0609	103.084	BraA03g031830.3C	protein_coding	chrA03:15807139-15807843:-	gi|685287678|ref|XP_009134784.1|	744	4e-99	PREDICTED: pathogenesis-related protein PR-4-like [Brassica rapa]	gi|923548463|ref|XM_013880327.1|	423	0	PREDICTED: Brassica napus pathogenesis-related protein PR-4-like (LOC106438995), mRNA	P32045
PR1	BraA03g042600.3C	0	0	0	0	0	0	0.175682	0.575757	0	0	0	0	5.52252	6.38567	6.92274	3.29894	2.94847	1.17806	0	0	0	0	0	0	0	0	0	0.355495	1.00332	1.77503	0.384781	0.19075	0	1.71424	0.586845	6.06992	BraA03g042600.3C	protein_coding	chrA03:21387971-21388456:-	gi|685290569|ref|XP_009136247.1|	783	3e-104	PREDICTED: pathogenesis-related protein 1-like [Brassica rapa]	gi|685290568|ref|XM_009137999.1|	486	0	PREDICTED: Brassica rapa pathogenesis-related protein 1-like (LOC103860401), mRNA	Q9ZNS4
PR1	BraA03g058050.3C	42.2311	20.7471	40.5602	11.3457	8.50892	7.03472	165.557	168.535	178.951	355.656	362.087	337.065	2121.12	2059.59	2097.96	117.564	137.131	495.267	14.4576	11.1954	11.0576	46.1799	54.9193	66.5776	95.1527	106.783	122.735	241.774	212.918	217.946	1166.68	1193.1	1062.09	977.221	1053.87	706.954	BraA03g058050.3C	protein_coding	chrA03:30531482-30531973:+	gi|685294645|ref|XP_009138205.1|	877	1e-118	PREDICTED: pathogenesis-related protein 1-like [Brassica rapa]	gi|685294644|ref|XM_009139957.1|	489	0	PREDICTED: Brassica rapa pathogenesis-related protein 1-like (LOC103862254), mRNA	P33154
PR1	BraA03g058070.3C	71.0979	19.5266	71.6624	12.1679	15.5997	13.567	137.617	162.658	153.386	485.353	485.473	466.97	2527.25	2567.08	2439.35	121.074	135.675	391.233	16.2648	13.5428	12.3695	41.999	53.3613	56.4286	126.488	147.307	168.622	253.011	239.677	220.4	1329.55	1311.8	1229.33	797.728	813.11	569.048	BraA03g058070.3C	protein_coding	chrA03:30558997-30559488:-	gi|685294645|ref|XP_009138205.1|	877	1e-118	PREDICTED: pathogenesis-related protein 1-like [Brassica rapa]	gi|685294646|ref|XM_009139958.1|	483	0	PREDICTED: Brassica rapa pathogenesis-related protein 1-like (LOC103862255), mRNA	P33154
PR1	BraA03g058090.3C	233.606	92.9698	236.619	36.3968	36.8944	40.782	93.4133	103.191	91.3408	138.44	140.386	131.612	906.761	837.738	915.075	318.034	350.425	629.205	93.8237	131.899	136.334	134.801	218.478	256.916	531.357	472.459	545.869	1149.51	1171	1072.24	1070.01	1147.71	1057.19	386.744	431.99	566.13	BraA03g058090.3C	protein_coding	chrA03:30574098-30574586:+	gi|685294651|ref|XP_009138209.1|	775	4e-103	PREDICTED: pathogenesis-related protein 1-like [Brassica rapa]	gi|685294650|ref|XM_009139961.1|	489	0	PREDICTED: Brassica rapa pathogenesis-related protein 1-like (LOC103862257), mRNA	Q9ZNS4
PR1	BraA06g003490.3C	0.358567	0	0.366	0.16544	0	0.168521	0	0	0	2.218	2.70718	2.91257	0	0.384636	0.176417	0	0	0	1.2728	0.545036	1.88567	0.382413	0	0	1.34569	1.35264	3.52293	0.353314	0.166194	0.529242	0	0	0.175643	0	0	0	BraA06g003490.3C	protein_coding	chrA06:2093978-2094578:-	gi|923656983|ref|XP_013646410.1|	851	1e-114	PREDICTED: pathogenesis-related leaf protein 6-like [Brassica napus]	gi|923656982|ref|XM_013790956.1|	480	0	PREDICTED: Brassica napus pathogenesis-related leaf protein 6-like (LOC106351137), mRNA	P04284
PR5	BraA06g014920.3C	1.06481	0.694557	1.93224	1.85601	1.88322	2.44662	0.576123	1.00699	0.935571	0.121975	0.510433	1.08116	15.8621	15.4836	13.272	5.82529	6.76836	14.2168	2.99981	0.959146	1.86658	2.14508	6.46536	4.85181	2.91788	2.42287	1.46832	0.932635	1.86447	2.21196	2.52367	2.75236	3.12957	8.76967	11.4185	27.2455	BraA06g014920.3C	protein_coding	chrA06:7953446-7954349:+	gi|685317818|ref|XP_009149407.1|	1277	1e-176	PREDICTED: pathogenesis-related protein 5-like [Brassica rapa]	gi|685317817|ref|XM_009151159.1|	741	0	PREDICTED: Brassica rapa pathogenesis-related protein 5-like (LOC103872728), mRNA	P28493
PR5	BraA07g027960.3C	0	0	0.273661	0	0	0.252008	0.261106	0.285238	0	0.552805	0	0.544437	0.849081	0.287595	0.263816	3.77155	5.11249	2.45123	0	0	1.9739	0	0	0	0	1.15586	0.277275	0.792526	0.248529	0	0.571877	1.134	0	17.07	19.1882	46.2344	BraA07g027960.3C	protein_coding	chrA07:21005918-21006244:-	gi|685334393|ref|XP_009104727.1|	572	4e-72	PREDICTED: pathogenesis-related protein 5-like [Brassica rapa]	gi|685334392|ref|XM_009106479.1|	327	4e-170	PREDICTED: Brassica rapa pathogenesis-related protein 5-like (LOC103830671), mRNA	P28493
PR	BraA07g041840.3C	1.7911	3.7816	1.53956	1.30484	3.42971	1.94941	4.13136	4.4129	5.53755	40.5269	41.4834	42.2106	12.34	12.6403	15.4911	5.30451	6.29166	3.57066	17.7829	9.07515	9.12177	6.1328	5.66658	6.87252	11.7255	11.9893	10.8218	28.9809	27.7887	28.6627	27.0452	26.6151	24.2891	5.28537	6.54238	5.84842	BraA07g041840.3C	protein_coding	chrA07:28135367-28136992:-	gi|674945941|emb|CDX87436.1|	1635	0	BnaA07g34370D [Brassica napus]	gi|923669355|ref|XM_013794677.1|	912	0	PREDICTED: Brassica napus pathogen-related protein-like (LOC106354678), mRNA	P16273
PR	BraA08g019950.3C	18.284	17.7366	15.3133	15.7186	16.7015	17.6271	4.10927	5.48663	4.06033	11.4389	15.0011	10.7898	54.1111	49.6201	49.5156	72.3271	70.8816	70.8272	13.9473	10.1351	11.5056	15.3333	15.5425	16.0213	16.4218	9.2639	8.56588	10.6249	10.2854	10.9179	15.667	17.5163	25.5677	6.23725	5.76175	3.7795	BraA08g019950.3C	protein_coding	chrA08:15339587-15340147:-	gi|685346294|ref|XP_009109192.1|	1016	9e-139	PREDICTED: pathogenesis-related protein PR-1-like [Brassica rapa]	gi|685346293|ref|XM_009110944.1|	561	0	PREDICTED: Brassica rapa pathogenesis-related protein PR-1-like (LOC103834855), mRNA	Q40374
CH25	BraA01g038870.3C	115.745	49.7563	116.432	76.908	74.5813	78.4233	16.6808	13.5259	12.9656	26.7601	29.3291	29.5822	24.419	31.1584	26.2366	1.11779	0.96204	3.92069	82.2883	107.182	95.4592	54.8006	27.7897	21.1198	66.5523	57.6657	56.885	14.876	17.0231	17.7224	39.9243	34.2623	29.6677	11.3264	9.95687	11.8831	BraA01g038870.3C	protein_coding	chrA01:26299380-26300847:+	gi|685266584|ref|XP_009120632.1|	1556	0	PREDICTED: endochitinase CH25-like [Brassica rapa]	gi|685266583|ref|XM_009122384.1|	990	0	PREDICTED: Brassica rapa endochitinase CH25-like (LOC103845514), mRNA	Q09023
CH25	BraA05g034520.3C	37.6855	23.7352	32.1324	26.342	27.9657	27.3628	45.7126	56.4198	46.6506	8.14267	5.47632	5.38447	24.4179	31.1058	33.9742	28.5706	24.5896	82.6752	13.5031	19.5519	19.2251	6.13707	6.53576	6.04082	8.59002	15.323	13.6529	10.4507	10.8777	10.3253	14.8015	19.3283	16.9126	12.3306	13.0919	12.5763	BraA05g034520.3C	protein_coding	chrA05:24587337-24590590:+	gi|923628942|ref|XP_013749938.1|	1270	4e-174	PREDICTED: endochitinase CH25-like [Brassica napus]	gi|685312092|ref|XM_009148362.1|	769	0	PREDICTED: Brassica rapa endochitinase CH25 (LOC103870249), mRNA	Q09023
CHB4	BraA03g016200.3C	4.50433	3.97716	6.39193	3.95376	4.24685	4.44046	2.35388	3.27273	1.8616	5.54987	3.79179	4.35038	7.19058	7.18879	7.24305	3.09097	3.29209	10.762	4.23402	15.9201	14.2127	3.98371	2.64156	3.62923	11.0734	16.1039	16.0205	6.06213	8.14725	5.72948	9.95947	7.20259	8.0723	2.50562	3.09748	6.12269	BraA03g016200.3C	protein_coding	chrA03:7487079-7488240:+	gi|685283648|ref|XP_009132730.1|	1390	0	PREDICTED: basic endochitinase CHB4-like [Brassica rapa]	gi|685283647|ref|XM_009134482.1|	795	0	PREDICTED: Brassica rapa basic endochitinase CHB4-like (LOC103857315), mRNA	Q06209
CHB4	BraA03g018400.3C	99.119	105.088	94.0505	62.9894	64.2191	59.9601	71.2574	75.523	67.01	35.1867	38.223	36.7577	211.69	205.165	203.438	52.4612	53.9142	68.6474	60.0504	140.223	143.819	96.4074	70.6708	68.9376	133.409	176.408	177.391	79.294	78.2364	76.0733	242.477	222.537	216.432	71.2917	81.8255	89.2058	BraA03g018400.3C	protein_coding	chrA03:8629001-8630613:-	gi|674868795|emb|CDY65766.1|	1309	0	BnaA03g56430D [Brassica napus]	gi|922455076|ref|XM_013774379.1|	692	0	PREDICTED: Brassica oleracea var. oleracea basic endochitinase CHB4-like (LOC106335772), mRNA	O24658
CHB4	BraA03g022840.3C	13.9404	7.88064	15.8104	20.8682	23.7156	22.3245	17.6998	18.5666	20.2973	148.83	147.907	153.077	187.389	184.432	199.158	108.367	112.521	141.752	30.2665	7.95278	10.1006	46.1443	43.2247	41.6404	69.7573	33.5006	34.0676	94.8305	102.041	96.021	66.85	73.3773	72.6366	211.469	231.234	571.907	BraA03g022840.3C	protein_coding	chrA03:10985456-10986575:-	gi|685285418|ref|XP_009133615.1|	1341	0	PREDICTED: basic endochitinase CHB4 [Brassica rapa]	gi|685285417|ref|XM_009135367.1|	849	0	PREDICTED: Brassica rapa basic endochitinase CHB4 (LOC103858078), mRNA	O24603
CHB4	BraA03g022860.3C	37.9141	16.0501	35.2626	34.385	30.6315	33.1873	19.2558	22.6536	24.1763	72.4637	45.2284	64.9692	657.826	616.935	635.625	119.509	125.776	493.361	41.6476	11.229	14.397	40.7832	42.8622	47.0251	36.6939	25.0573	24.9424	67.0102	64.5519	65.2076	23.8679	29.8676	25.224	50.9988	55.8397	74.5949	BraA03g022860.3C	protein_coding	chrA03:10997274-10998587:-	gi|685285424|ref|XP_009133618.1|	1196	1e-163	PREDICTED: basic endochitinase CHB4 [Brassica rapa]	gi|685285423|ref|XM_009135370.1|	807	0	PREDICTED: Brassica rapa basic endochitinase CHB4 (LOC103858080), mRNA	Q06209
CHB4	BraA03g022890.3C	5.61984	0.989743	4.81853	1.1409	1.15011	0.950847	0.875708	1.07622	1.90456	4.51918	6.30385	5.592	9.01767	8.92208	9.17979	0.94869	1.68403	6.753	10.2593	7.859	8.51161	2.9968	1.22842	0.896237	13.1368	12.5989	11.6242	6.53428	4.68859	6.52528	5.15459	6.77455	5.39561	3.09749	2.55955	2.95471	BraA03g022890.3C	protein_coding	chrA03:11014781-11015879:-	gi|685285428|ref|XP_009133620.1|	1187	3e-162	PREDICTED: basic endochitinase CHB4-like [Brassica rapa]	gi|685285427|ref|XM_009135372.1|	777	0	PREDICTED: Brassica rapa basic endochitinase CHB4-like (LOC103858082), mRNA	O22842
CHB4	BraA03g022910.3C	164.76	135.892	167.214	172.336	171.605	160.481	186.064	184.985	179.734	72.0261	75.4654	79.9757	146.841	170.559	171.299	109.037	100.581	392.909	39.9424	41.1831	42.8547	86.7976	92.4969	90.7984	126.016	115.603	125.767	33.5427	35.2456	35.8671	79.2029	84.0652	81.682	84.2077	94.6146	102.43	BraA03g022910.3C	protein_coding	chrA03:11030012-11031469:-	gi|685285430|ref|XP_009133622.1|	1289	2e-177	PREDICTED: basic endochitinase CHB4 [Brassica rapa]	gi|685285429|ref|XM_009135374.1|	837	0	PREDICTED: Brassica rapa basic endochitinase CHB4 (LOC103858083), mRNA	O22841
CHB4	BraA04g030190.3C	228.708	34.9803	230.276	46.4745	47.5994	49.97	55.0034	55.1257	50.9232	184.72	191.574	173.296	269.007	271.681	262.883	78.5753	81.0203	180.965	149.347	87.7908	88.8303	109.304	69.9938	78.7362	242.794	289.73	323.879	682.608	749.383	715.216	115.827	111.442	121.017	623.165	663.572	385.202	BraA04g030190.3C	protein_coding	chrA04:20720561-20721754:+	gi|685303006|ref|XP_009142209.1|	1400	0	PREDICTED: basic endochitinase CHB4-like [Brassica rapa]	gi|685303005|ref|XM_009143961.1|	846	0	PREDICTED: Brassica rapa basic endochitinase CHB4-like (LOC103866089), mRNA	O22842
CHB4	BraA05g003700.3C	45.8928	32.519	50.7303	28.0112	29.7156	29.4033	35.5756	43.2426	41.6141	53.042	57.1564	57.4631	37.802	44.483	44.0453	22.292	19.762	71.0967	19.3065	14.3897	17.8574	31.9349	50.8323	46.1823	66.312	57.8928	56.9342	37.1092	45.8807	42.1207	36.6545	38.518	39.0131	64.0484	71.748	88.9409	BraA05g003700.3C	protein_coding	chrA05:1941313-1942525:-	gi|923689214|ref|XP_013656027.1|	1310	2e-180	PREDICTED: basic endochitinase CHB4-like [Brassica napus]	gi|923689213|ref|XM_013800573.1|	852	0	PREDICTED: Brassica napus basic endochitinase CHB4-like (LOC106360897), mRNA	O22841
CHB4	BraA05g003710.3C	2.86919	36.8065	2.8202	31.1833	31.413	27.2691	46.0543	50.7629	43.5762	145.6	141.894	107.466	75.2738	88.002	73.3016	10.9128	9.6978	22.6239	14.2263	39.7361	45.0428	48.7334	42.6239	41.5202	143.687	564.087	594.13	3997.29	3991.24	4206.04	47.7143	53.9371	50.4925	5189.57	5626.7	3258.61	BraA05g003710.3C	protein_coding	chrA05:1952676-1953786:-	gi|923684910|ref|XP_013654779.1|	1339	0	PREDICTED: basic endochitinase CHB4-like [Brassica napus]	gi|923684909|ref|XM_013799325.1|	822	0	PREDICTED: Brassica napus basic endochitinase CHB4-like (LOC106359665), mRNA	O22841
CHB4	BraA09g018740.3C	19.1383	15.9221	14.6221	33.4176	27.2317	30.8083	40.8492	45.9658	46.8645	90.6199	68.2299	79.474	219.579	214.886	218.32	19.6683	25.4436	70.9496	39.7499	19.2779	22.4195	51.4556	30.5611	31.0695	33.6702	22.2334	23.4673	186.886	167.212	158.55	46.6898	50.6541	41.4289	43.0172	45.2354	96.6457	BraA09g018740.3C	protein_coding	chrA09:11994852-11995941:+	gi|685357196|ref|XP_009113391.1|	1346	0	PREDICTED: basic endochitinase CHB4-like [Brassica rapa]	gi|685357195|ref|XM_009115143.1|	765	0	PREDICTED: Brassica rapa basic endochitinase CHB4-like (LOC103838693), mRNA	Q06209
[truncated: 15 more columns]

## Sheet: MYB(52)
The FPKM and annotation of MYBs involving clubroot resistances.
name	DH199S0d1	DH199S0d2	DH199S0d3	DH199S2d1	DH199S2d2	DH199S2d3	DH199S5d1	DH199S5d2	DH199S5d3	DH199S8d1	DH199S8d2	DH199S8d3	DH199S13d1	DH199S13d2	DH199S13d3	DH199S22d1	DH199S22d2	DH199S22d3	DH40R0d1	DH40R0d2	DH40R0d3	DH40R2d1	DH40R2d2	DH40R2d3	DH40R5d1	DH40R5d2	DH40R5d3	DH40R8d1	DH40R8d2	DH40R8d3	DH40R13d1	DH40R13d2	DH40R13d3	DH40R22d1	DH40R22d2	DH40R22d3	GeneName	Biotype	Position	NR:Seq-id	NR:Score	NR:Evalue	NR:Description	NT:Seq-id	NT:Score	NT:Evalue	NT:Description	Uniprot:UniProtKB-AC	Uniprot:Score
BraA01g003380.3C	52.6418	41.6159	54.346	44.4212	40.3938	43.7433	143.375	82.9445	80.4957	81.5104	88.7289	83.7315	54.9382	57.3279	50.8154	15.205	23.5827	27.9733	17.8641	12.17	14.6314	20.9201	16.2976	15.0484	29.9404	33.6546	34.4667	47.2358	46.2008	50.1252	22.6283	27.9383	23.5313	54.7804	37.8756	27.5719	BraA01g003380.3C	protein_coding	chrA01:1686531-1688167:+	gi|685256811|ref|XP_009107363.1|	1338	0	PREDICTED: transcription factor MYB32-like [Brassica rapa]	gi|685256810|ref|XM_009109115.1|	857	0	PREDICTED: Brassica rapa transcription factor MYB32-like (LOC103832978), mRNA	O49608	396
BraA01g018920.3C	1.92125	1.97873	2.06429	1.7729	1.95443	1.04553	4.53005	4.84114	4.45495	3.02321	3.59908	3.28546	4.05639	2.92869	3.98007	0.284498	0.550926	0.132073	1.74342	2.97161	3.61605	4.20589	4.19958	4.60744	2.71068	4.46847	3.76481	0.797097	0.937357	0.199	3.88243	4.59779	4.45792	1.92184	2.0834	2.02024	BraA01g018920.3C	protein_coding	chrA01:10065975-10067160:-	gi|685261210|ref|XP_009144191.1|	1343	0	PREDICTED: transcription factor MYB39-like [Brassica rapa]	gi|685261209|ref|XM_009145943.1|	867	0	PREDICTED: Brassica rapa transcription factor MYB39-like (LOC103867859), mRNA	Q9M0J5	421
BraA01g038670.3C	0.792493	1.26001	0.505577	1.27978	1.46417	2.14164	2.50838	3.26718	4.02862	1.73618	0.961604	1.91107	1.35949	1.27517	0.779823	0.97549	0.539721	0.905708	3.41592	2.30886	3.22992	2.3243	3.46456	3.3853	1.69955	1.49478	0.819607	0.585663	1.37744	2.53438	6.44476	8.58955	7.66695	2.2593	1.39649	1.66666	BraA01g038670.3C	protein_coding	chrA01:26184857-26186191:+	gi|685385404|ref|XP_009124668.1|	1577	0	PREDICTED: transcription factor MYB86-like [Brassica rapa]	gi|685385403|ref|XM_009126420.1|	885	0	PREDICTED: Brassica rapa transcription factor MYB86-like (LOC103849707), mRNA	Q8LPH6	213
BraA01g039610.3C	8.09072	2.95378	7.88867	8.24602	8.23768	8.28607	6.87991	6.93764	5.86582	4.66858	4.49345	3.49441	5.92778	6.93021	6.53545	4.24689	5.59235	6.93984	1.77584	3.67111	3.23875	3.47728	3.36546	3.92037	2.84868	3.57923	3.8091	1.66583	2.12687	1.78237	2.89779	2.93691	3.25338	7.5738	4.97606	3.87287	BraA01g039610.3C	protein_coding	chrA01:26672091-26673662:-	gi|685376382|ref|XP_009121136.1|	2446	0	PREDICTED: transcription factor GAMYB-like isoform X1 [Brassica rapa]	gi|685376383|ref|XM_009122890.1|	1237	0	PREDICTED: Brassica rapa transcription factor GAMYB-like (LOC103845973), transcript variant X2, mRNA	Q9FR97	654
BraA01g042000.3C	118.987	160.689	113.369	45.8686	45.1285	45.6104	117.3	130.853	129.067	61.2882	59.7982	59.7134	42.0943	43.9456	48.3745	5.2508	5.95206	21.2843	111.997	154.065	162.108	103.598	101.986	106.918	141.546	149.146	152.151	54.1815	55.7827	57.0631	116.805	110.225	111.308	180.466	188.262	164.367	BraA01g042000.3C	protein_coding	chrA01:28059511-28061663:-	gi|685267616|ref|XP_009124852.1|	1431	0	PREDICTED: transcription factor MYB108 [Brassica rapa]	gi|685267615|ref|XM_009126604.1|	963	0	PREDICTED: Brassica rapa transcription factor MYB108 (LOC103849889), mRNA	Q9LDE1	480
BraA01g043960.3C	3.85459	1.49102	2.4705	1.6544	1.63069	2.10651	4.97622	6.48522	6.27841	2.95734	3.38397	3.18563	2.64969	2.88477	1.94059	0.252208	0.122099	1.17083	3.00018	2.36182	3.01707	2.58129	3.91888	3.26761	1.15345	1.25603	1.57605	1.41326	1.57884	1.67593	5.16268	4.92906	4.47889	3.06669	2.72181	2.26226	BraA01g043960.3C	protein_coding	chrA01:29094798-29096560:-	gi|685266271|ref|XP_009118932.1|	1521	0	PREDICTED: transcription factor MYB3-like [Brassica rapa]	gi|685266272|ref|XM_009120691.1|	978	0	PREDICTED: Brassica rapa transcription factor MYB3-like (LOC103843907), transcript variant X2, mRNA	Q9S9Z2	255
BraA02g003400.3C	4.75525	4.22967	4.67733	5.6646	6.29119	5.20121	14.146	16.5573	12.0133	14.1726	14.8271	13.6069	8.03193	9.27451	8.0823	0.729762	0.471058	1.6939	8.85636	8.76143	10.1848	8.0222	7.93748	7.78052	5.4698	3.82067	4.38144	9.54158	7.45365	7.57171	18.6266	15.9993	14.8231	4.43673	4.12528	5.90942	BraA02g003400.3C	protein_coding	chrA02:1669528-1670697:+	gi|685268464|ref|XP_009125309.1|	1628	0	PREDICTED: transcription factor MYB39-like [Brassica rapa]	gi|923534944|ref|XM_013856925.1|	1014	0	PREDICTED: Brassica napus transcription factor MYB39-like (LOC106416089), mRNA	Q9SBF3	497
BraA02g004540.3C	0	0	0	3.08191	5.22112	4.90516	0.406579	0.444156	0.235802	0.860797	1.01312	1.05971	2.09339	3.24674	2.4648	2.20232	1.13727	1.09055	0.635102	0.317289	0.109773	1.22441	2.50948	2.0211	1.00721	1.34988	0.215879	0.822717	0.386995	0.205396	0.890494	0.882898	1.12474	0.396723	0.565887	0.768225	BraA02g004540.3C	protein_coding	chrA02:2182980-2184980:-	gi|685269733|ref|XP_009125868.1|	1235	4e-169	PREDICTED: transcription factor MYB46-like [Brassica rapa]	gi|923535026|ref|XM_013857210.1|	837	0	PREDICTED: Brassica napus transcription factor MYB46-like (LOC106416348), mRNA	Q9LXV2	409
BraA02g005970.3C	0	0	0.108469	0.0980607	0	0	0	0.226116	0.240089	0.438224	0.229231	0.323693	0.224363	0	0.209134	0.298981	0.43423	0	0.4311	0	0	0	0.232283	0	0.113947	0	0	1.78006	3.15225	1.46392	0.226671	0.112369	0.416433	0.100984	0.115235	0	BraA02g005970.3C	protein_coding	chrA02:2834391-2835741:+	gi|685270058|ref|XP_009126044.1|	1274	1e-174	PREDICTED: transcription factor MYB34-like [Brassica rapa]	gi|685270057|ref|XM_009127796.1|	463	0	PREDICTED: Brassica rapa transcription factor MYB34-like (LOC103850980), mRNA	Q9LXF1	394
BraA02g021770.3C	3.97933	0.608353	3.30023	2.52454	2.54492	1.51956	8.4776	7.5412	8.00724	1.79485	2.28012	2.65153	3.41318	5.86938	3.79334	0.524807	0.338761	1.13695	2.01791	2.77234	3.00824	5.30497	5.02868	4.53294	2.66685	2.01046	3.34382	0.49013	1.03747	0.97891	5.83558	6.18029	4.75132	2.48163	2.83184	2.48447	BraA02g021770.3C	protein_coding	chrA02:12707476-12708819:+	gi|685273903|ref|XP_009127989.1|	1183	1e-162	PREDICTED: transcription factor WER-like isoform X1 [Brassica rapa]	gi|685273902|ref|XM_009129741.1|	705	0	PREDICTED: Brassica rapa transcription factor MYB44-like (LOC103852846), transcript variant X1, mRNA	Q9FX36	362
BraA02g022090.3C	61.432	48.5985	50.5154	53.182	54.6212	57.6592	133.403	150.93	143.803	10.167	10.7341	7.44093	76.122	77.1565	71.1332	13.3639	17.2527	51.0497	23.582	53.1762	60.7115	116.465	161.079	155.519	83.5288	82.2049	87.862	9.98468	8.0514	7.92334	90.8966	86.9641	86.3324	85.2033	90.654	96.3729	BraA02g022090.3C	protein_coding	chrA02:12916821-12918750:+	gi|923759383|ref|XP_013676724.1|	1368	0	PREDICTED: transcription factor MYB122-like [Brassica napus]	gi|923759382|ref|XM_013821270.1|	873	0	PREDICTED: Brassica napus transcription factor MYB122-like (LOC106381366), mRNA	Q9C9C8	372
BraA02g022310.3C	1.53806	4.97766	1.32842	3.60284	5.64965	5.56051	17.8598	19.5105	19.1124	20.4918	17.3547	19.1005	10.6164	9.13783	9.66294	1.83081	2.57842	3.09062	4.6797	1.7984	2.48878	4.79488	3.87922	2.56068	4.69397	6.75852	8.19815	21.8003	19.6318	19.2091	17.6657	16.5141	15.416	9.33183	9.49406	11.8188	BraA02g022310.3C	protein_coding	chrA02:13026314-13027692:+	gi|685274020|ref|XP_009128044.1|	1222	3e-168	PREDICTED: transcription factor MYB34-like [Brassica rapa]	gi|685274021|ref|XM_009129797.1|	738	0	PREDICTED: Brassica rapa transcription factor MYB34-like (LOC103852904), transcript variant X2, mRNA	Q9M0J5	183
BraA02g042730.3C	0	0	0	0.590512	0.606302	0.601509	0.311611	0	0.240966	3.40863	2.18564	2.59899	1.80146	2.05935	1.46928	2.25054	1.74326	1.25373	0.540842	0.324237	0.224353	0	0.466261	0.121492	0	0.114953	0.110303	1.05092	0.692071	0.734629	0.454997	0.676674	0.731417	0.101353	0	0	BraA02g042730.3C	protein_coding	chrA02:29664947-29672210:+	gi|923504001|ref|XP_013742659.1|	1392	0	PREDICTED: transcription factor MYB34-like [Brassica napus]	gi|685278717|ref|XM_009132044.1|	673	0	PREDICTED: Brassica rapa transcription factor MYB34-like (LOC103855087), mRNA	O64399	378
BraA02g043710.3C	1.95388	5.15332	1.64753	1.95979	2.02829	2.31569	4.30217	4.69979	5.66199	5.43002	7.05518	8.108	2.6904	3.82735	3.5945	2.74863	2.54563	4.21636	5.34175	2.66867	1.16155	3.44283	3.2496	3.1934	3.09711	3.20466	2.72359	19.8385	18.3485	16.7183	4.80194	4.67115	4.91034	7.66921	9.67271	5.80635	BraA02g043710.3C	protein_coding	chrA02:30242329-30243686:-	gi|685278568|ref|XP_009130218.1|	1618	0	PREDICTED: myb-related protein 306-like [Brassica rapa]	gi|685278567|ref|XM_009131970.1|	1032	0	PREDICTED: Brassica rapa myb-related protein 306-like (LOC103855009), mRNA	Q24JK1	521
BraA03g003120.3C	0.35315	0.950207	0.540707	11.08	10.7405	11.1203	8.94227	10.802	8.97615	86.6518	84.5592	86.9537	8.01539	7.19769	7.64509	13.9103	15.3926	3.34412	28.5636	3.75762	5.85013	25.9879	25.6669	22.6283	24.2353	12.7512	11.7788	113.354	112.287	116.151	23.7286	27.914	27.5918	9.2289	8.61652	8.16964	BraA03g003120.3C	protein_coding	chrA03:1379345-1380755:+	gi|685280197|ref|XP_009131005.1|	1765	0	PREDICTED: transcription factor MYB29-like [Brassica rapa]	gi|923539490|ref|XM_013870419.1|	993	0	PREDICTED: Brassica napus transcription factor MYB29-like (LOC106429668), mRNA	Q9FLR1	440
BraA03g008160.3C	0	0	0.189994	0.257644	0.211626	0.262442	0	0	0.210269	0.0959487	0.10038	0.0944963	0.196496	0.399336	0.641057	0.523693	0.126766	0.121558	0.188778	0	0.0978866	1.48885	1.42403	1.48421	0.698561	0.401239	0.385007	0	0.0862727	0.183156	0.496295	0.295237	0.820598	0.353766	0.807379	0.587178	BraA03g008160.3C	protein_coding	chrA03:3506257-3507967:+	gi|685281415|ref|XP_009131611.1|	1601	0	PREDICTED: transcription factor MYB23-like [Brassica rapa]	gi|685281414|ref|XM_009133363.1|	942	0	PREDICTED: Brassica rapa transcription factor MYB23-like (LOC103856266), mRNA	Q6R053	422
BraA03g011150.3C	5.65222	9.4132	6.26041	24.0814	25.7052	25.095	15.6943	17.0168	13.0419	12.5223	13.4897	10.0127	12.0607	10.1913	11.1237	8.79718	5.89695	10.8381	24.3935	17.9144	19.6055	44.6338	45.2139	49.5907	19.4718	10.7583	12.8106	9.47987	7.35768	8.63848	30.2695	33.5719	29.5723	32.4562	27.3861	44.7657	BraA03g011150.3C	protein_coding	chrA03:4812469-4813397:+	gi|685282123|ref|XP_009131973.1|	1178	9e-162	PREDICTED: transcription factor MYB59 isoform X2 [Brassica rapa]	gi|685282122|ref|XM_009133725.1|	729	0	PREDICTED: Brassica rapa transcription factor MYB59 (LOC103856607), transcript variant X2, mRNA	Q4JL84	409
BraA03g012340.3C	7.83393	12.3155	8.98465	12.3462	10.4079	9.26662	8.48672	8.7092	6.36381	9.5284	9.114	7.68608	3.9027	3.68243	3.98426	0.619125	0.83925	2.06941	13.7478	16.8584	17.2198	8.73043	11.2556	14.3382	8.68332	7.5897	7.46472	11.015	8.97548	11.4329	12.0163	14.7061	11.4691	9.03381	6.5861	5.46087	BraA03g012340.3C	protein_coding	chrA03:5283829-5285436:-	gi|685282412|ref|XP_009132117.1|	1487	0	PREDICTED: transcription factor RAX3 [Brassica rapa]	gi|685282411|ref|XM_009133869.1|	996	0	PREDICTED: Brassica rapa transcription factor RAX3 (LOC103856743), mRNA	Q9FKL2	521
BraA03g014870.3C	0	0	0	21.7082	23.4239	17.7174	6.54592	5.13	7.59283	14.7627	17.0204	16.1712	3.23924	4.3887	4.60096	3.69989	2.98533	2.67184	5.63124	0.148068	0.153682	23.9984	40.4027	45.4392	19.1146	3.62218	5.59126	8.20661	9.21047	8.48287	22.7521	16.2233	23.6195	4.4433	4.595	9.06505	BraA03g014870.3C	protein_coding	chrA03:6631119-6631794:+	gi|685283222|ref|XP_009132523.1|	1015	2e-138	PREDICTED: transcription factor MYB82-like [Brassica rapa]	gi|685283221|ref|XM_009134275.1|	600	0	PREDICTED: Brassica rapa transcription factor MYB82-like (LOC103857119), mRNA	Q9LTF7	310
BraA03g024500.3C	0	0.30337	0.0791221	1.00142	1.93888	1.5301	1.8873	1.56692	2.10158	0.0799148	0.167211	0.472231	0.65464	0.415754	0.610207	0	0	0.404977	1.022	1.17826	1.22293	0.826703	0.762467	0.529795	0.415589	0.417735	0.56117	0.458278	0.359279	0	1.32275	1.9672	0.987233	0.589297	0.840574	0.570565	BraA03g024500.3C	protein_coding	chrA03:12049513-12052554:+	gi|685285801|ref|XP_009133816.1|	1775	0	PREDICTED: transcription factor MYB12-like [Brassica rapa]	gi|685285800|ref|XM_009135568.1|	1131	0	PREDICTED: Brassica rapa transcription factor MYB12-like (LOC103858247), mRNA	O22264	473
BraA03g032740.3C	80.1003	162.931	83.0323	40.1406	39.8704	39.8975	98.352	114.272	112.675	72.8996	67.3789	73.3527	49.5622	54.4733	50.7237	24.3964	20.881	46.5538	51.308	63.111	60.7673	51.1951	51.1022	51.4066	46.8491	51.5316	52.1223	21.1479	20.2506	20.9302	52.9333	51.266	55.3821	172.451	177.254	131.077	BraA03g032740.3C	protein_coding	chrA03:16241283-16243106:+	gi|685287911|ref|XP_009134903.1|	1327	0	PREDICTED: transcription factor MYB108-like isoform X1 [Brassica rapa]	gi|685287910|ref|XM_009136655.1|	915	0	PREDICTED: Brassica rapa transcription factor MYB108-like (LOC103859162), transcript variant X1, mRNA	Q9LDE1	431
BraA03g044990.3C	42.2444	340.777	51.1355	30.5439	30.061	27.4689	110.454	82.8033	75.2321	59.3335	70.4359	57.1233	21.8258	21.9648	24.5502	28.8049	21.933	17.0073	71.071	54.4931	54.7819	34.877	34.8721	38.4972	32.0815	45.8531	56.1285	117.531	116.743	111.501	18.87	19.655	21.0341	57.7138	43.7619	48.0794	BraA03g044990.3C	protein_coding	chrA03:22704697-22705578:-	gi|685291163|ref|XP_009136534.1|	1245	3e-170	PREDICTED: transcription factor MYB44-like [Brassica rapa]	gi|685291162|ref|XM_009138286.1|	882	0	PREDICTED: Brassica rapa transcription factor MYB44-like (LOC103860642), mRNA	Q9SN12	337
BraA03g047750.3C	18.2854	16.0118	18.4088	2.69667	2.18338	2.27599	23.2563	24.5174	23.3916	10.6739	10.2663	8.47767	5.20042	3.67218	3.12208	0.704741	0.568634	0.545273	6.68975	18.1912	18.0027	10.6857	6.84405	7.79909	3.22307	7.10938	9.06691	10.1194	9.82966	8.54449	6.14441	5.56226	6.05315	10.7115	12.4948	12.555	BraA03g047750.3C	protein_coding	chrA03:24124038-24125468:-	gi|685291871|ref|XP_009136872.1|	1793	0	PREDICTED: transcription factor MYB39 [Brassica rapa]	gi|923601675|ref|XM_013885872.1|	1050	0	PREDICTED: Brassica napus transcription factor MYB39-like (LOC106444397), mRNA	Q8GWP0	517
BraA03g054190.3C	1.03628	0.912529	1.58665	0.860639	2.35641	1.3637	4.44065	5.18182	5.50205	2.88458	3.46488	3.68268	2.95372	2.00093	2.34535	0.583119	0.14115	1.48887	0.420399	0.630077	1.08994	2.2104	1.3591	2.00677	1.11119	1.34031	1.39326	0.510552	0.0960625	0.407879	2.9841	3.06823	2.94419	3.0528	2.35987	5.23046	BraA03g054190.3C	protein_coding	chrA03:28106186-28108779:-	gi|674903144|emb|CDY29882.1|	1364	0	BnaA03g49030D [Brassica napus]	gi|685293732|ref|XM_009139514.1|	694	0	PREDICTED: Brassica rapa transcription repressor MYB6-like (LOC103861808), transcript variant X2, mRNA	Q9M0J5	348
BraA03g059110.3C	45.5538	25.2288	50.2268	15.6645	15.6354	15.7542	54.8283	66.4111	59.9561	31.2355	29.3175	29.2355	29.7157	25.0091	32.0333	9.06836	7.75601	14.7344	9.47984	20.686	21.9223	20.0521	22.6625	21.5398	33.7547	38.7926	41.89	11.6451	13.4452	11.9462	21.4275	19.1998	18.9462	33.4881	30.9906	34.3442	BraA03g059110.3C	protein_coding	chrA03:31363379-31364260:-	gi|685294898|ref|XP_009138333.1|	1323	0	PREDICTED: transcription factor MYB32-like [Brassica rapa]	gi|685294897|ref|XM_009140085.1|	816	0	PREDICTED: Brassica rapa transcription factor MYB32-like (LOC103862384), mRNA	O49608	390
BraA04g017120.3C	9.4751	16.9799	8.34805	12.609	13.0407	14.3438	13.9874	9.33788	8.45024	10.1797	10.0044	7.69645	13.3718	10.378	9.71619	6.0332	7.06426	9.63998	4.34962	5.86209	3.98629	4.57395	2.61616	3.97648	1.8181	2.04248	2.68191	6.58455	6.28701	8.04761	2.87207	2.32025	2.54052	2.65385	2.70389	2.83168	BraA04g017120.3C	protein_coding	chrA04:13031782-13032660:-	gi|685299398|ref|XP_009140453.1|	1385	0	PREDICTED: transcription factor MYB44 [Brassica rapa]	gi|685299397|ref|XM_009142205.1|	879	0	PREDICTED: Brassica rapa transcription factor MYB44 (LOC103864458), mRNA	O23160	340
BraA04g022490.3C	118.756	48.9833	120.148	124.52	133.298	123.118	136.066	144.306	146.78	24.6064	23.608	27.6622	89.8458	93.2942	102.536	39.3083	34.0954	105.687	20.9002	42.9457	44.6963	99.3361	107.905	122.28	92.2585	102.272	104.516	8.60412	8.20244	9.1651	83.3197	77.0689	81.2127	174.7	173.472	164.786	BraA04g022490.3C	protein_coding	chrA04:16674124-16675494:-	gi|685300847|ref|XP_009141138.1|	1291	1e-178	PREDICTED: myb-related protein Myb4 [Brassica rapa]	gi|923620408|ref|XM_013891741.1|	753	0	PREDICTED: Brassica napus myb-related protein Myb4-like (LOC106450082), mRNA	Q9SJX8	430
BraA05g000480.3C	0	0.447926	0.31153	2.39391	2.16875	2.86881	0.371547	0.811773	1.12052	0	0	0	0.724933	0.327393	0.675728	0.429346	0.727496	3.5877	0.464305	0.541241	0.882768	3.90601	5.00348	5.9972	4.90895	4.11191	4.41903	0	0.14146	0.150159	1.54616	1.69434	2.31729	0.507557	0.165481	0.481394	BraA05g000480.3C	protein_coding	chrA05:273959-277027:-	gi|685303653|ref|XP_009142534.1|	1718	0	PREDICTED: transcription factor MYB12 [Brassica rapa]	gi|923621380|ref|XM_013892082.1|	1149	0	PREDICTED: Brassica napus transcription factor MYB12 (LOC106450432), mRNA	O22264	453
BraA05g013420.3C	0.230104	0.337708	0.352311	0.955513	0.78485	0.865162	1.34459	1.22405	0.519879	0.237227	0.124092	0.350455	1.82185	0.7405	1.69819	1.45665	3.91776	7.96442	0	0	0	0.122704	0.502975	0.262116	0	0.124005	0.237977	0	0	0	0.490824	0.486637	0.338147	1.64	1.24762	2.05666	BraA05g013420.3C	protein_coding	chrA05:7410157-7411726:-	gi|685307761|ref|XP_009144594.1|	1173	2e-160	PREDICTED: myb-related protein 308-like [Brassica rapa]	gi|923632939|ref|XM_013895857.1|	762	0	PREDICTED: Brassica napus myb-related protein 308 (LOC106453630), mRNA	Q9SJX8	380
BraA05g034360.3C	3.56622	2.52002	3.43792	4.57063	3.15359	2.79345	7.13924	4.32111	5.25958	2.96172	1.49583	1.91107	3.55558	4.67561	4.97137	2.36905	1.61916	1.81142	5.82715	5.72196	6.45985	6.86724	7.14565	5.19079	4.3551	5.33852	6.96666	1.8546	2.47939	2.24195	10.3539	11.1036	9.60795	4.61275	3.65237	3.22915	BraA05g034360.3C	protein_coding	chrA05:24520086-24521146:+	gi|685312060|ref|XP_009146593.1|	1446	0	PREDICTED: transcription repressor MYB6 [Brassica rapa]	gi|685312059|ref|XM_009148345.1|	885	0	PREDICTED: Brassica rapa transcription repressor MYB6 (LOC103870232), mRNA	Q8LPH6	213
BraA05g041540.3C	3.43802	1.59339	3.694	2.00372	3.60027	3.06155	5.63923	7.79679	6.84775	3.73101	4.48881	5.23621	3.24736	2.62041	4.18431	0.381826	0.985868	0.827194	4.86322	3.30059	3.7112	5.98246	6.42733	4.74082	3.20145	3.02296	3.55565	2.31787	3.01928	3.20495	8.29841	8.03629	6.91369	3.35311	2.35465	3.80545	BraA05g041540.3C	protein_coding	chrA05:27927733-27929487:+	gi|685278762|ref|XP_009130319.1|	1642	0	PREDICTED: myb-related protein 330-like [Brassica rapa]	gi|685278761|ref|XM_009132071.1|	969	0	PREDICTED: Brassica rapa myb-related protein 330-like (LOC103855119), mRNA	Q9S9Z2	263
BraA06g006420.3C	2.36945	1.11623	2.14984	2.91532	3.49215	3.54704	0.940137	1.12039	1.78445	8.77599	9.37059	7.21748	6.57761	6.87205	4.83584	2.34561	2.39066	1.83395	4.89518	3.46826	4.24587	2.05906	2.58964	1.59946	5.55193	4.72932	4.44723	7.43658	6.75207	4.66305	6.45809	7.79496	6.79204	4.50334	4.85337	3.78345	BraA06g006420.3C	protein_coding	chrA06:3676038-3677178:+	gi|685315264|ref|XP_009148252.1|	1554	0	PREDICTED: transcription repressor MYB6-like [Brassica rapa]	gi|685315263|ref|XM_009150004.1|	999	0	PREDICTED: Brassica rapa transcription repressor MYB6-like (LOC103871726), mRNA	Q8VZQ2	486
BraA06g033420.3C	0.982292	0	1.25332	2.19057	0.558409	0.769437	0	0.348357	0	3.03811	2.64868	3.24146	1.64187	1.22933	1.61098	0.230308	0.445988	0.106916	2.40758	1.57608	1.46364	2.09524	2.32608	2.51764	6.23198	2.99974	3.0477	2.74239	5.15993	4.59121	6.72236	6.57846	6.17504	0.311155	0.0887665	0.430378	BraA06g033420.3C	protein_coding	chrA06:22832841-22834154:-	gi|674945430|emb|CDX88230.1|	1738	0	BnaA06g28210D [Brassica napus]	gi|922526575|ref|XM_013740967.1|	979	0	PREDICTED: Brassica oleracea var. oleracea transcription factor MYB86-like (LOC106304569), mRNA	Q8LPH6	543
BraA07g008760.3C	1.3967	0.840958	1.31599	0	0.366456	0.201977	0.209268	0.342914	0.242737	0.332293	0.11588	0.218175	0.113419	0.345748	0.317162	0	0.439019	0.140328	2.28824	4.24607	3.95505	0.572917	1.87876	1.83578	2.76489	2.43177	2.88897	0.846915	0.597565	0.634312	1.6042	1.24969	1.26308	1.12308	1.8641	2.37246	BraA07g008760.3C	protein_coding	chrA07:8771563-8772529:+	gi|685328752|ref|XP_009102521.1|	1145	9e-156	PREDICTED: myb-related protein 305-like [Brassica rapa]	gi|923634909|ref|XM_013896583.1|	816	0	PREDICTED: Brassica napus myb-related protein 305-like (LOC106454465), mRNA	Q4JL84	171
BraA07g014550.3C	102.501	151.777	102.159	105.13	99.1763	102.853	84.9535	85.6753	82.903	10.9865	7.46509	9.7047	25.283	26.516	23.7831	1.85458	5.23742	13.3448	51.3653	107.322	114.164	100.882	77.686	84.974	92.8283	65.5995	62.9457	10.9335	9.87855	10.2698	61.7487	65.5204	63.2868	21.5066	18.3466	28.303	BraA07g014550.3C	protein_coding	chrA07:13228057-13229041:-	gi|937575810|ref|NP_001302680.1|	1244	9e-171	transcription factor MYB3 [Brassica napus]	gi|937575809|ref|NM_001315751.1|	798	0	Brassica napus transcription factor MYB3 (LOC106397230), mRNA	Q9S9K9	340
BraA07g028240.3C	0.220552	0.107897	0.225125	1.42466	0.626893	1.14022	0.322194	0.234648	0.498299	6.70772	9.27736	9.29345	1.51339	1.77441	1.84472	1.86158	3.30452	0.720172	1.3421	0.223499	0.347959	1.29371	1.44629	1.13056	0.709482	0	0.114049	3.47715	3.06675	2.49576	1.41135	1.74914	2.70092	0.419179	0.478334	0.579792	BraA07g028240.3C	protein_coding	chrA07:21145283-21148705:-	gi|685334484|ref|XP_009104762.1|	1245	4e-171	PREDICTED: transcription factor MYB122-like [Brassica rapa]	gi|685334483|ref|XM_009106514.1|	795	0	PREDICTED: Brassica rapa transcription factor MYB122-like (LOC103830700), mRNA	Q9LE63	195
BraA07g032020.3C	0.831977	1.11928	0.424612	0.287901	0.236479	0.293262	0.202566	0.774506	0.587407	0.214433	0.336504	0.527969	0.329359	0.111558	0.307003	0.292597	0	0	2.21495	1.47541	0.765675	0.665481	2.04591	2.36931	2.23028	2.12971	1.39822	4.20142	2.3137	3.68398	0.998241	1.86948	1.32451	0.790622	0.676647	1.20291	BraA07g032020.3C	protein_coding	chrA07:23162738-23163680:+	gi|685335619|ref|XP_009105194.1|	1236	2e-169	PREDICTED: protein ODORANT1 [Brassica rapa]	gi|685335618|ref|XM_009106946.1|	843	0	PREDICTED: Brassica rapa protein ODORANT1 (LOC103831093), mRNA	Q9C7U7	353
BraA07g033470.3C	0.8203	0.902924	0.732643	2.74398	2.56476	3.56614	0.299584	0.545454	0.579163	0.317136	0.884751	0.416447	0.757717	1.09992	1.31168	9.52019	7.96088	2.94639	1.03993	1.66252	2.69617	0.218714	0.784464	0.817619	0.439796	0.99465	0.318137	2.32382	2.75649	3.83407	2.95269	2.71065	4.21912	11.6929	16.6788	9.91953	BraA07g033470.3C	protein_coding	chrA07:23888121-23889152:+	gi|685336063|ref|XP_009105377.1|	1382	0	PREDICTED: transcription factor MYB24-like [Brassica rapa]	gi|685336062|ref|XM_009107129.1|	855	0	PREDICTED: Brassica rapa transcription factor MYB24-like (LOC103831245), mRNA	Q9C9G7	405
BraA08g000070.3C	0	0	0	0	0.110751	0.091563	0	0.103636	0	0	0	0	0	0.104493	0.383413	0	0	0	0	0	0	0.103889	0	0	0	0	0	0.76787	0.361195	0.57511	0.103891	0	0.190865	0.0925687	0	0	BraA08g000070.3C	protein_coding	chrA08:26418-27498:-	gi|685339876|ref|XP_009106799.1|	1565	0	PREDICTED: myb-related protein 308 [Brassica rapa]	gi|685339875|ref|XM_009108551.1|	900	0	PREDICTED: Brassica rapa myb-related protein 308 (LOC103832533), mRNA	Q9SGU3	387
BraA08g016600.3C	2.08737	9.19047	2.72249	1.81918	2.37324	1.52605	5.30811	7.27922	6.28806	0.836885	0.500306	0.353236	2.93809	2.36353	2.054	1.14194	1.10568	4.69541	8.58564	18.0972	16.4659	10.7599	12.1672	13.8703	8.82864	10.999	10.3142	12.2265	9.78236	12.0956	8.90494	9.31948	6.24856	50.472	52.8161	35.4847	BraA08g016600.3C	protein_coding	chrA08:13472313-13473173:+	gi|685345275|ref|XP_009108800.1|	1351	0	PREDICTED: transcriptional activator Myb-like [Brassica rapa]	gi|685345274|ref|XM_009110552.1|	753	0	PREDICTED: Brassica rapa transcriptional activator Myb-like (LOC103834480), mRNA	Q9FX36	182
BraA08g028440.3C	0	0.0896319	0	0.253605	0.624928	0	0.267654	0.292391	1.24184	0.472224	0.296419	0.279046	0.290125	0.0982691	0.0901441	0.128871	0.124779	0.239305	0.929095	0.278498	0.289057	0.195402	0.200244	0.521768	0.19646	0.39495	0.094743	0.2708	0.169841	0.36057	1.66095	0.968697	0.807736	0.261166	0.0993406	0.192658	BraA08g028440.3C	protein_coding	chrA08:19854245-19855346:-	gi|674936652|emb|CDX96687.1|	1391	0	BnaA08g22300D [Brassica napus]	gi|685349361|ref|XM_009112060.1|	946	0	PREDICTED: Brassica rapa myb-related protein 308 (LOC103835873), mRNA	Q9XHV0	113
BraA08g028980.3C	2.28494	1.05898	1.47304	2.21948	2.87132	1.80865	7.14441	7.93266	6.79265	1.98373	2.46447	3.17477	3.04691	3.7411	2.60342	0.50753	0	1.72782	3.41509	3.04667	3.66813	5.64335	7.22897	7.94547	4.90019	2.59237	3.97999	2.36997	1.33776	1.77503	8.46519	6.48549	9.66107	1.9428	2.47779	2.65559	BraA08g028980.3C	protein_coding	chrA08:20083439-20084680:-	gi|685349551|ref|XP_009110374.1|	1267	3e-175	PREDICTED: transcriptional activator Myb-like [Brassica rapa]	gi|685349550|ref|XM_009112126.1|	729	0	PREDICTED: Brassica rapa transcriptional activator Myb-like (LOC103835930), mRNA	Q6R0C4	426
BraA08g032570.3C	0.33784	0.0826375	0.431055	2.33815	2.68875	2.54048	0.822558	0.718865	0.858701	2.17687	1.18425	2.31543	3.29898	3.98643	3.32439	1.90104	2.18579	3.64041	0.256978	0.941474	0.2665	1.9817	3.78467	4.23326	2.44525	1.00136	0.873498	1.24834	2.19222	0.914192	2.9726	2.85794	2.81333	5.0565	4.94578	8.25952	BraA08g032570.3C	protein_coding	chrA08:21631044-21632264:-	gi|685350643|ref|XP_009110822.1|	1768	0	PREDICTED: transcription repressor MYB6-like [Brassica rapa]	gi|685350642|ref|XM_009112574.1|	1038	0	PREDICTED: Brassica rapa transcription repressor MYB6-like (LOC103836328), mRNA	Q8VZQ2	546
BraA09g003320.3C	6.52191	15.4621	8.96151	2.77769	1.85377	1.88628	5.37452	4.40343	5.95071	12.5425	15.8273	12.6073	1.05922	1.88356	1.23416	0.176437	0.341669	0.163816	6.86892	9.27809	8.17878	4.01288	3.564	4.00037	4.43807	5.27207	7.00448	13.5943	10.9289	11.6009	5.08308	3.58085	4.42348	4.29074	5.7123	4.08841	BraA09g003320.3C	protein_coding	chrA09:2060882-2063162:+	gi|685352504|ref|XP_009111584.1|	1008	3e-136	PREDICTED: transcription factor MYB21 [Brassica rapa]	gi|685352503|ref|XM_009113336.1|	699	0	PREDICTED: Brassica rapa transcription factor MYB21 (LOC103837005), mRNA	Q9LK95	369
BraA09g006980.3C	0	0	0	0.301304	0.649657	0.153458	0.476992	0.521076	1.29098	10.1829	10.1249	11.1062	0.258519	0.175128	0.240972	0	0	0	0.496728	0.248159	0	0.174116	0.624504	1.20881	0.875292	0.351925	0	3.6195	4.38882	3.29323	0.783535	0.863169	1.1196	0.0775715	0	0.17167	BraA09g006980.3C	protein_coding	chrA09:4000947-4002323:-	gi|685353574|ref|XP_009111992.1|	1691	0	PREDICTED: transcription factor MYB28-like [Brassica rapa]	gi|685353573|ref|XM_009113744.1|	1074	0	PREDICTED: Brassica rapa transcription factor MYB28-like (LOC103837381), mRNA	Q9SPG2	494
BraA09g025090.3C	14.7424	12.5466	11.3974	6.35931	6.54588	7.4617	12.2338	14.6638	16.1612	8.90346	9.40873	10.983	8.10386	7.48605	6.00871	3.55877	5.70332	9.34289	8.67025	8.92829	10.1843	5.48906	5.81574	4.27289	6.17355	6.86358	7.75875	5.75902	5.98398	7.55368	4.93095	6.18029	7.00788	1.82374	1.41894	1.92629	BraA09g025090.3C	protein_coding	chrA09:16877524-16878727:-	gi|685359941|ref|XP_009114510.1|	1502	0	PREDICTED: myb-related protein 315 [Brassica rapa]	gi|685359940|ref|XM_009116262.1|	1005	0	PREDICTED: Brassica rapa myb-related protein 315 (LOC103839774), mRNA	Q9M0Y5	409
BraA09g057480.3C	0	0.230585	0.120278	0	0	0	0.11476	0	0	0.121483	0	0	0.124395	0	0.115952	0	0	0.153908	2.39017	6.68695	5.82504	5.4039	6.56808	5.50339	4.67505	4.31817	3.53414	1.16109	1.42002	1.1595	6.28373	7.35155	5.07947	2.01561	2.93896	2.60205	BraA09g057480.3C	protein_coding	chrA09:40905900-40907123:-	gi|685367282|ref|XP_009117637.1|	1334	0	PREDICTED: transcription factor MYB44-like [Brassica rapa]	gi|923703188|ref|XM_013804775.1|	744	0	PREDICTED: Brassica napus transcription factor MYB44-like (LOC106365331), mRNA	Q6R0C4	429
BraA09g058260.3C	4.38348	2.45079	4.79395	12.7129	13.5275	10.5951	8.74144	8.10584	5.77715	7.53197	7.87981	7.20602	10.7975	10.3	9.44839	4.25781	3.69612	10.7691	6.03347	7.08612	11.6359	12.9119	11.0645	14.8611	6.49091	6.07447	9.82248	2.98235	2.51546	3.08095	17.3646	17.2165	17.3823	20.0345	16.4107	15.9132	BraA09g058260.3C	protein_coding	chrA09:41366555-41367573:+	gi|685367583|ref|XP_009117764.1|	1371	0	PREDICTED: myb-related protein Myb4 [Brassica rapa]	gi|685367582|ref|XM_009119516.1|	840	0	PREDICTED: Brassica rapa myb-related protein Myb4 (LOC103842849), mRNA	Q9SA47	406
BraA09g059430.3C	0	0	0.219331	0	0	0	0.209268	0	0	0	0	0	0	0	0	0	0.585359	0	0.653782	2.17747	4.06805	0.687501	0.704534	1.71339	0.691223	1.15799	0.666684	0	0.199188	0.211437	0.458343	0.227217	0.421026	6.12587	8.38844	2.93733	BraA09g059430.3C	protein_coding	chrA09:41906117-41906680:-	gi|685367897|ref|XP_009117907.1|	656	7e-86	PREDICTED: uncharacterized protein LOC103842974 isoform X1 [Brassica rapa]	gi|685367896|ref|XM_009119659.1|	408	0	PREDICTED: Brassica rapa uncharacterized LOC103842974 (LOC103842974), transcript variant X1, mRNA	Q94FL6	150
BraA09g062350.3C	1.871	0.34869	1.54602	1.72653	2.32982	0.586227	1.99571	1.51663	1.50971	2.93931	4.1321	2.89481	5.07895	4.77863	6.83831	1.62936	1.21355	3.37471	2.7108	2.52799	4.31059	5.79624	7.01098	9.64157	10.6999	5.95375	7.18718	2.10696	1.48663	1.92872	10.0724	5.37007	8.29215	22.098	25.0232	19.0182	BraA09g062350.3C	protein_coding	chrA09:43290034-43291216:-	gi|685368841|ref|XP_009118313.1|	1683	0	PREDICTED: transcription repressor MYB6-like isoform X1 [Brassica rapa]	gi|685368840|ref|XM_009120065.1|	984	0	PREDICTED: Brassica rapa transcription factor MYB86-like (LOC103843348), transcript variant X1, mRNA	Q8VZQ2	477
BraA10g017610.3C	96.0191	68.1176	96.3803	50.8741	50.536	48.4745	66.4876	62.9656	65.0536	9.74725	10.992	8.85168	13.4806	14.6202	14.6196	6.04558	6.02083	14.5941	53.1743	83.9883	93.2423	50.8096	50.1897	51.8913	27.6489	19.0572	19.6831	5.56544	8.19518	7.97421	34.5721	36.874	35.1256	27.0705	24.6327	33.1821	BraA10g017610.3C	protein_coding	chrA10:13251847-13252790:-	gi|685374551|ref|XP_009120496.1|	1177	9e-162	PREDICTED: transcription factor MYB59-like isoform X1 [Brassica rapa]	gi|685374550|ref|XM_009122248.1|	714	0	PREDICTED: Brassica rapa transcription factor MYB59-like (LOC103845398), transcript variant X1, mRNA	Q4JL84	396
BraA10g022270.3C	3.14711	0.703818	3.94661	7.1358	7.56515	8.87457	2.45198	3.06126	2.1331	3.42994	3.39438	3.74322	13.0044	13.6001	15.661	10.1194	10.9003	14.7979	2.64463	2.64245	3.40465	9.68565	15.9203	17.2077	14.2697	11.9205	11.9032	0.620202	1.66705	0.884784	14.7685	16.4491	13.3899	18.0295	17.7462	21.8412	BraA10g022270.3C	protein_coding	chrA10:15694024-15695903:-	gi|923776174|ref|XP_013680888.1|	1506	0	PREDICTED: myb-related protein B-like [Brassica napus]	gi|685376172|ref|XM_009122803.1|	966	0	PREDICTED: Brassica rapa myb-related protein B (LOC103845898), mRNA	Q6R053	397
[truncated: 14 more columns]

## Sheet: WRKY(57)
The FPKM and annotation of WRKYs involving clubroot resistances.
name	DH199S0d1	DH199S0d2	DH199S0d3	DH199S2d1	DH199S2d2	DH199S2d3	DH199S5d1	DH199S5d2	DH199S5d3	DH199S8d1	DH199S8d2	DH199S8d3	DH199S13d1	DH199S13d2	DH199S13d3	DH199S22d1	DH199S22d2	DH199S22d3	DH40R0d1	DH40R0d2	DH40R0d3	DH40R2d1	DH40R2d2	DH40R2d3	DH40R5d1	DH40R5d2	DH40R5d3	DH40R8d1	DH40R8d2	DH40R8d3	DH40R13d1	DH40R13d2	DH40R13d3	DH40R22d1	DH40R22d2	DH40R22d3	GeneName	Biotype	Position	NR:Seq-id	NR:Score	NR:Evalue	NR:Description	NT:Seq-id	NT:Score	NT:Evalue	NT:Description	Uniprot:UniProtKB-AC	Uniprot:Score
BraA01g014230.3C	28.0425	6.93154	31.3355	17.5238	19.0179	17.8502	13.5116	14.0275	13.6718	23.94	21.0128	21.6794	130.463	122.436	141.843	2.07626	2.54641	5.14062	20.1579	28.6165	30.8399	48.1667	41.0797	42.0313	65.5196	92.5828	82.7317	9.1136	10.1244	8.8106	79.4399	86.8778	79.2379	21.4124	18.9924	21.0033	BraA01g014230.3C	protein_coding	chrA01:7536155-7537482:+	gi|685259791|ref|XP_009137157.1|	1425	0	PREDICTED: probable WRKY transcription factor 29 [Brassica rapa]	gi|685259790|ref|XM_009138909.1|	891	0	PREDICTED: Brassica rapa probable WRKY transcription factor 29 (LOC103861203), mRNA	Q9SUS1	392
BraA01g015000.3C	14.6116	20.0319	14.6466	19.6195	19.6964	17.9288	28.2901	21.2237	20.9539	7.66727	9.15379	9.59449	8.31285	11.075	8.093	22.4012	24.6692	15.999	7.72011	7.00442	7.91416	13.4371	16.1607	16.0464	6.09821	3.67782	4.61489	4.6555	4.54197	3.70205	4.94571	3.70077	3.8573	11.8898	8.91864	9.66031	BraA01g015000.3C	protein_coding	chrA01:7967089-7968473:+	gi|685259940|ref|XP_009137837.1|	1712	0	PREDICTED: probable WRKY transcription factor 7 [Brassica rapa]	gi|685259941|ref|XM_009139596.1|	1002	0	PREDICTED: Brassica rapa probable WRKY transcription factor 7 (LOC103861876), transcript variant X2, mRNA	Q9STX0	467
BraA01g044960.3C	4.25263	2.4005	3.50602	2.06275	1.92161	1.74243	1.27435	2.1462	1.17021	4.77774	5.05719	4.59471	7.48226	5.26363	5.74047	4.44846	4.23293	3.06207	3.87065	3.37021	2.58048	1.16294	0.71505	0.558954	2.16308	2.17425	1.52243	2.52494	2.83026	1.77039	1.74444	1.5566	1.70924	0.880784	0.650347	1.1466	BraA01g044960.3C	protein_coding	chrA01:29586216-29588432:+	gi|685267890|ref|XP_009125039.1|	2293	0	PREDICTED: probable WRKY transcription factor 72 [Brassica rapa]	gi|685267889|ref|XM_009126791.1|	1608	0	PREDICTED: Brassica rapa probable WRKY transcription factor 72 (LOC103850084), mRNA	Q9LXG8	410
BraA02g000030.3C	20.7876	27.0205	23.6787	5.83815	3.65364	4.53095	39.2188	42.8435	45.0374	21.3276	19.9297	21.9225	9.32919	8.94114	9.38769	3.67305	3.82998	12.1984	26.3789	21.0654	19.4347	6.96163	6.58534	6.06291	9.15296	9.84966	11.0091	30.5763	26.7173	30.0401	14.1377	14.6543	13.3802	26.3391	32.2341	32.4185	BraA02g000030.3C	protein_coding	chrA02:14953-15998:+	gi|685268643|ref|XP_009125387.1|	1137	2e-154	PREDICTED: LOW QUALITY PROTEIN: probable WRKY transcription factor 62 [Brassica rapa]	gi|685268642|ref|XM_009127139.1|	870	0	PREDICTED: Brassica rapa probable WRKY transcription factor 62 (LOC103850398), mRNA	Q9LZV6	348
BraA02g009830.3C	1.02538	0.300975	0.941969	2.8386	3.26424	2.12041	2.69626	2.29091	2.08499	1.37425	1.7695	2.60279	4.22157	5.38963	5.7512	0.721227	2.3743	3.08031	1.87188	1.3508	1.72555	3.17135	6.27571	5.72334	3.62831	2.32085	3.49951	2.02071	1.23567	1.91703	8.09256	8.78252	6.83096	34.494	31.5785	28.7882	BraA02g009830.3C	protein_coding	chrA02:4679264-4680417:-	gi|685271023|ref|XP_009126547.1|	1298	2e-178	PREDICTED: probable WRKY transcription factor 38 [Brassica rapa]	gi|685271022|ref|XM_009128299.1|	855	0	PREDICTED: Brassica rapa probable WRKY transcription factor 38 (LOC103851447), mRNA	Q8GWF1	300
BraA02g018110.3C	5.87729	2.47589	6.2491	2.63641	1.39212	2.45532	1.66947	0.694769	1.01434	6.98495	6.86732	7.4594	7.15236	6.12947	6.0243	1.14832	2.22371	2.13235	5.29843	6.36941	6.78261	5.13641	3.39016	3.62643	8.49033	5.71878	10.1306	10.8585	8.47497	7.87161	11.1436	12.7749	8.79685	1.16357	2.03593	2.31755	BraA02g018110.3C	protein_coding	chrA02:10063484-10064978:+	gi|685273124|ref|XP_009127604.1|	1315	4e-179	PREDICTED: probable WRKY transcription factor 9 isoform X1 [Brassica rapa]	gi|685273123|ref|XM_009129356.1|	812	0	PREDICTED: Brassica rapa probable WRKY transcription factor 9 (LOC103852452), transcript variant X1, mRNA	Q9C9F0	343
BraA02g025750.3C	3.05142	2.29659	1.31775	1.5162	2.93557	2.09602	6.85795	5.7437	5.8335	4.59783	3.16458	3.33659	2.84959	3.02148	3.46458	0.8255	0.639428	2.14605	2.61863	4.40042	1.97503	2.37818	2.95018	4.0107	3.77535	3.03588	3.03444	3.70058	3.59019	3.00258	3.50476	3.10255	3.56435	9.14534	9.67234	4.56615	BraA02g025750.3C	protein_coding	chrA02:15457998-15458970:+	gi|685274841|ref|XP_009128407.1|	1271	1e-175	PREDICTED: probable WRKY transcription factor 67 [Brassica rapa]	gi|685274840|ref|XM_009130159.1|	744	0	PREDICTED: Brassica rapa probable WRKY transcription factor 67 (LOC103853236), mRNA	Q93WV7	213
BraA02g025770.3C	12.8627	14.9035	14.2811	1.97825	2.43738	2.7575	18.7905	19.0867	19.374	21.1709	24.0958	22.2252	8.69515	6.53584	8.77113	3.65069	4.91792	6.48433	14.8763	9.71876	9.25652	4.33205	6.53576	4.49848	6.1703	7.41827	10.5022	46.5836	47.1715	46.0754	12.3947	10.4993	9.5064	30.5584	33.2802	34.051	BraA02g025770.3C	protein_coding	chrA02:15475638-15476567:+	gi|674851061|emb|CDY71652.1|	1324	0	BnaAnng38320D [Brassica napus]	gi|922426446|ref|XM_013763817.1|	744	0	PREDICTED: Brassica oleracea var. oleracea probable WRKY transcription factor 64 (LOC106325767), mRNA	Q9C557	228
BraA02g028540.3C	42.6025	143.652	43.5755	22.8242	25.3193	22.4219	90.2678	83.3461	79.2494	55.6277	54.684	54.0707	64.4875	60.8073	66.4332	28.1083	36.6872	55.989	51.0633	81.7051	82.4883	58.9539	64.455	67.2794	61.9158	82.2534	87.847	125.675	123.78	120.825	43.3714	44.7699	41.6511	110.999	107.668	100.517	BraA02g028540.3C	protein_coding	chrA02:17828776-17829988:-	gi|685275399|ref|XP_009128690.1|	1706	0	PREDICTED: probable WRKY transcription factor 41 [Brassica rapa]	gi|685275398|ref|XM_009130442.1|	996	0	PREDICTED: Brassica rapa probable WRKY transcription factor 41 (LOC103853537), mRNA	Q8H0Y8	428
BraA02g032790.3C	6.10634	3.69854	5.34251	9.12306	13.0587	10.2496	2.26551	2.32022	1.14968	3.14769	3.13624	3.24766	12.739	9.20161	11.5882	12.4761	9.70356	19.1795	4.86596	10.9025	6.88128	7.28773	7.1505	4.1404	6.8595	10.1857	9.92398	0.573037	0.673871	1.85981	6.51257	5.07337	5.27015	4.28303	8.51364	6.2681	BraA02g032790.3C	protein_coding	chrA02:22644999-22646380:-	gi|685275753|ref|XP_009128857.1|	772	1e-99	PREDICTED: probable WRKY transcription factor 8 [Brassica rapa]	gi|685275752|ref|XM_009130609.1|	600	0	PREDICTED: Brassica rapa probable WRKY transcription factor 8 (LOC103853701), mRNA	Q9FL26	210
BraA02g041180.3C	0.345837	0.507561	0.706012	0	0.1966	1.46284	1.51565	1.28779	0.586017	1.78271	0.746018	1.9313	0.91272	1.11294	1.19108	0.243254	0.471058	2.25853	0	0.175229	0	0.553255	0.566963	0.7879	1.1125	0.186374	0	1.87424	0.801468	1.19106	1.6598	1.64564	2.3717	5.91563	5.43787	10.546	BraA02g041180.3C	protein_coding	chrA02:28579445-28580456:-	gi|685277942|ref|XP_009129914.1|	782	5e-104	PREDICTED: probable WRKY transcription factor 50 [Brassica rapa]	gi|685277943|ref|XM_009131667.1|	507	0	PREDICTED: Brassica rapa probable WRKY transcription factor 50 (LOC103854702), transcript variant X2, mRNA	Q8VWQ5	240
BraA02g044790.3C	14.1688	12.8522	16.873	7.89934	9.22926	6.65913	15.0927	15.7025	11.671	8.36885	9.23291	8.54189	11.8414	12.9824	16.9922	2.07626	4.02065	7.9037	16.6153	32.4554	29.3393	11.1759	9.03322	14.795	15.1929	13.0443	10.5323	8.2895	7.25126	6.8258	18.1022	17.6357	16.4838	72.0914	72.182	101.499	BraA02g044790.3C	protein_coding	chrA02:30810754-30811927:+	gi|685279079|ref|XP_009130475.1|	1062	1e-145	PREDICTED: probable WRKY transcription factor 51 isoform X2 [Brassica rapa]	gi|685279078|ref|XM_009132227.1|	594	0	PREDICTED: Brassica rapa probable WRKY transcription factor 51 (LOC103855260), transcript variant X2, mRNA	Q93WU9	285
BraA03g005540.3C	76.4147	189.909	71.9524	64.8658	59.7158	69.7859	59.4209	53.7788	50.1876	8.14267	10.0095	11.8286	52.3198	63.5429	54.0146	62.776	62.665	80.4646	54.0695	137.663	126.268	80.0226	80.063	86.3709	76.2213	62.9945	63.7134	15.5649	16.4734	22.7324	83.3936	89.99	82.7941	258.379	282.209	226.73	BraA03g005540.3C	protein_coding	chrA03:2404017-2405054:-	gi|685280816|ref|XP_009131315.1|	788	1e-105	PREDICTED: probable WRKY transcription factor 75 [Brassica rapa]	gi|685280815|ref|XM_009133067.1|	444	0	PREDICTED: Brassica rapa probable WRKY transcription factor 75 (LOC103855997), mRNA	Q9FYA2	233
BraA03g006670.3C	21.1425	9.58502	23.8406	7.35455	6.54438	8.58403	6.09098	4.76963	6.12728	29.0437	24.117	27.8735	28.5128	31.1104	25.7061	9.6546	10.1773	9.54228	20.0394	19.0694	21.1895	11.6875	8.28718	7.18735	18.101	23.9212	27.7044	34.9032	35.1447	33.1668	27.6256	25.8683	25.1595	13.7801	15.9649	15.0153	BraA03g006670.3C	protein_coding	chrA03:2888845-2891051:+	gi|674955031|emb|CDX78611.1|	2027	0	BnaA03g05230D [Brassica napus]	gi|685281071|ref|XM_009133192.1|	1581	0	PREDICTED: Brassica rapa probable WRKY transcription factor 72 (LOC103856114), transcript variant X1, mRNA	Q9LXG8	640
BraA03g013050.3C	0.0649404	0.69893	0.596581	0.359556	0.295336	0.366252	0.505964	0.552727	0.513524	0.669508	0.700428	0.26375	0.685554	0.557295	0.830728	4.65912	3.44972	3.39281	0.329312	0.32904	0.409818	0.692593	0.780729	0.44385	0.97488	0.419963	0.537298	1.08782	1.08358	1.72533	0.554085	0.480689	0.254487	0.678837	1.69011	1.0243	BraA03g013050.3C	protein_coding	chrA03:5670823-5672331:-	gi|685282780|ref|XP_009132317.1|	1850	0	PREDICTED: probable WRKY transcription factor 2 [Brassica rapa]	gi|685282779|ref|XM_009134069.1|	1350	0	PREDICTED: Brassica rapa probable WRKY transcription factor 2 (LOC103856942), mRNA	Q9FG77	581
BraA03g024160.3C	10.3928	27.2838	10.9233	1.04448	1.87185	1.45082	24.3518	23.975	22.5506	35.1138	39.0661	36.6719	10.2109	9.60304	9.92284	4.48735	3.36375	4.30074	21.2894	11.2615	14.6106	9.98651	9.44672	10.7837	11.9163	15.7486	13.4088	39.137	38.3452	38.5769	14.157	15.4507	10.5849	26.695	30.797	30.0798	BraA03g024160.3C	protein_coding	chrA03:11893145-11894176:-	gi|688954746|ref|NP_001288851.1|	1506	0	probable WRKY transcription factor 46 [Brassica rapa]	gi|923599431|ref|XM_013885204.1|	852	0	PREDICTED: Brassica napus probable WRKY transcription factor 46 (LOC106443658), mRNA	Q9SKD9	387
BraA03g028140.3C	5.22646	3.62906	4.64644	2.54109	2.93916	1.79604	1.36829	1.67413	1.96804	7.58991	6.90999	9.18686	7.00056	5.66673	6.5807	3.24136	3.67425	8.58805	6.09861	9.22579	8.92537	3.59616	3.62384	3.13683	5.06188	7.2686	8.31133	8.47241	8.17898	9.23494	10.0694	10.459	9.30467	4.85986	7.25205	5.02301	BraA03g028140.3C	protein_coding	chrA03:14060778-14063245:+	gi|688954833|ref|NP_001288972.1|	2355	0	probable WRKY transcription factor 42 [Brassica rapa]	gi|937574872|ref|NM_001315925.1|	1533	0	Brassica napus probable WRKY transcription factor 42 (LOC106438760), mRNA	Q9XEC3	651
BraA04g001080.3C	7.06843	12.2835	7.21496	2.14176	1.31942	2.28081	18.2887	12.4588	12.1561	28.9315	27.7643	26.244	4.45486	3.05557	3.63343	1.18729	3.30506	3.58266	14.0166	8.44577	8.76597	5.1757	6.11105	6.00881	7.69246	6.93622	6.11007	18.0879	20.0483	20.4507	8.55132	8.58993	9.81887	4.21071	5.72015	7.21077	BraA04g001080.3C	protein_coding	chrA04:701135-702153:+	gi|685295801|ref|XP_009138761.1|	1253	6e-172	PREDICTED: probable WRKY transcription factor 46 [Brassica rapa]	gi|685295800|ref|XM_009140513.1|	823	0	PREDICTED: Brassica rapa probable WRKY transcription factor 46 (LOC103862817), mRNA	Q9SKD9	210
BraA04g002600.3C	22.6244	14.655	19.0307	18.0745	16.7913	17.8203	27.3384	24.739	24.493	14.362	13.3307	15.4209	32.6191	32.022	30.6112	6.63063	10.1294	12.4494	26.4512	26.3232	29.9652	26.8101	19.5755	18.7324	35.9403	32.6262	32.2812	19.6096	23.4	24.839	36.0826	37.8792	36.3259	15.1295	14.7658	20.486	BraA04g002600.3C	protein_coding	chrA04:1594026-1595579:-	gi|685296169|ref|XP_009138939.1|	1234	5e-169	PREDICTED: probable WRKY transcription factor 69 isoform X2 [Brassica rapa]	gi|685296168|ref|XM_009140691.1|	837	0	PREDICTED: Brassica rapa probable WRKY transcription factor 69 (LOC103862964), transcript variant X2, mRNA	Q93WV5	421
BraA04g004020.3C	0	0	0	0	0.116172	0	0.696586	0.434838	1.15428	0.737396	0.661243	1.45247	2.37307	0.657647	2.31254	0.718705	0.278353	0.667292	0.310889	0.207088	0.32241	0.653847	0	0.349183	0.109564	0	0.21135	3.4232	1.79966	2.21196	1.8526	1.40461	2.20229	7.2825	5.65095	14.8273	BraA04g004020.3C	protein_coding	chrA04:2480661-2481981:+	gi|685296520|ref|XP_009139102.1|	1412	0	PREDICTED: probable WRKY transcription factor 70 [Brassica rapa]	gi|685296519|ref|XM_009140854.1|	858	0	PREDICTED: Brassica rapa probable WRKY transcription factor 70 (LOC103863104), mRNA	Q9LY00	342
BraA04g004030.3C	0.892311	3.71049	0.683107	0.617558	0.760885	0.419373	7.38669	5.45871	4.78804	5.74959	5.0527	8.3806	2.59045	3.58945	1.31707	0.313816	0.30385	1.16547	3.61992	2.7127	3.75406	1.18957	1.70666	1.27056	0.956807	2.16393	2.07639	9.89145	9.51239	9.87784	11.658	11.7944	11.8016	2.96785	3.62859	7.03717	BraA04g004030.3C	protein_coding	chrA04:2485562-2486246:-	gi|923617764|ref|XP_013746459.1|	635	6e-81	PREDICTED: WRKY transcription factor 55-like [Brassica napus]	gi|923617763|ref|XM_013891005.1|	393	0	PREDICTED: Brassica napus WRKY transcription factor 55-like (LOC106449205), mRNA	Q9SHB5	142
BraA04g004040.3C	1.41403	1.84468	2.88668	0.434947	0.535892	1.10762	4.5904	4.01173	4.79211	28.1841	32.2818	31.8254	5.47337	4.29769	2.55093	1.98919	0.321003	0	4.78034	5.25403	2.97449	1.75941	0.772715	0.805374	6.57033	6.09624	5.60588	28.7951	33.862	33.1616	19.3539	16.1983	22.6267	4.25517	6.90016	4.46066	BraA04g004040.3C	protein_coding	chrA04:2487275-2487646:-	gi|685296522|ref|XP_009139103.1|	624	2e-79	PREDICTED: WRKY transcription factor 55-like [Brassica rapa]	gi|685296521|ref|XM_009140855.1|	357	0	PREDICTED: Brassica rapa WRKY transcription factor 55-like (LOC103863105), mRNA	Q9SHB5	73.6
BraA04g021550.3C	68.2707	36.0055	64.757	45.636	45.6257	44.2946	31.6228	34.7226	31.7896	59.4832	57.2914	53.8489	93.3408	95.2046	99.0484	21.082	22.227	37.7341	34.7889	46.15	48.3376	40.3125	31.4839	37.5566	67.1346	82.1082	78.356	35.6042	35.039	32.3602	63.045	56.8727	58.483	78.0109	86.7628	72.4013	BraA04g021550.3C	protein_coding	chrA04:16139418-16140792:-	gi|685300666|ref|XP_009141053.1|	1779	0	PREDICTED: probable WRKY transcription factor 25 [Brassica rapa]	gi|685300665|ref|XM_009142805.1|	1053	0	PREDICTED: Brassica rapa probable WRKY transcription factor 25 (LOC103865027), mRNA	O22921	508
BraA04g024840.3C	0.491736	0.893518	0.932157	0.51859	0.55908	1.0565	0.615732	0.298951	0.317426	0.362114	0.378837	0.641939	0.593268	1.80853	1.106	0.592931	0.0956837	0.550516	0.498718	0.498306	0.443313	0.22476	0.460657	1.5204	2.33509	1.89286	1.16242	0.761409	0.455835	0.898609	1.64827	1.78278	1.85818	1.00134	1.75207	1.55122	BraA04g024840.3C	protein_coding	chrA04:17958057-17960712:-	gi|685301430|ref|XP_009141404.1|	1651	0	PREDICTED: probable WRKY transcription factor 35 [Brassica rapa]	gi|685301429|ref|XM_009143156.1|	1245	0	PREDICTED: Brassica rapa probable WRKY transcription factor 35 (LOC103865359), mRNA	O64747	435
BraA04g028830.3C	0	0	0	0	0	0	0	0	0	0	0	0	0	0	0	0	0	0	6.13561	15.3783	12.4024	3.39006	1.90513	2.80327	3.07857	6.85203	5.19624	15.2564	15.7785	17.4551	3.39013	2.71065	3.01366	10.4262	7.67223	8.62568	BraA04g028830.3C	protein_coding	chrA04:20079795-20081428:+	gi|685302451|ref|XP_009141930.1|	1296	3e-178	PREDICTED: WRKY transcription factor 55-like [Brassica rapa]	gi|685302450|ref|XM_009143682.1|	852	0	PREDICTED: Brassica rapa WRKY transcription factor 55-like (LOC103865829), mRNA	Q9SHB5	337
BraA04g028840.3C	17.9224	11.6616	13.6979	3.91058	6.62499	4.31536	9.97407	12.0231	9.37509	10.6494	9.90333	11.7432	9.22702	10.5124	10.7726	3.97437	3.96842	2.65223	32.3243	38.2025	47.1725	22.4099	18.237	17.4992	22.2472	22.933	24.0141	28.6211	32.2457	31.6224	36.252	35.6627	37.8847	25.6731	28.4345	43.7261	BraA04g028840.3C	protein_coding	chrA04:20083312-20084832:-	gi|685302453|ref|XP_009141931.1|	1615	0	PREDICTED: probable WRKY transcription factor 54 isoform X1 [Brassica rapa]	gi|685302452|ref|XM_009143683.1|	993	0	PREDICTED: Brassica rapa probable WRKY transcription factor 54 (LOC103865830), transcript variant X1, mRNA	Q93WU8	391
BraA05g001400.3C	21.0878	41.1608	24.8029	10.4706	12.0487	9.65939	47.1214	49.6543	48.8534	117.311	124.345	120.752	24.9738	26.9844	28.2293	7.22812	6.85277	10.2064	25.5127	21.2611	21.842	15.7546	14.741	15.7299	34.5493	27.9206	28.4517	77.5253	80.2766	79.9466	25.2307	25.0155	25.6934	115.558	124.437	127.193	BraA05g001400.3C	protein_coding	chrA05:869351-870425:+	gi|685303877|ref|XP_009142650.1|	1431	0	PREDICTED: probable WRKY transcription factor 46 [Brassica rapa]	gi|923872395|ref|XM_013854680.1|	496	0	PREDICTED: Brassica napus probable WRKY transcription factor 46 (LOC106413960), mRNA	Q9SKD9	370
BraA05g001850.3C	0.515703	0	0.175465	0.634511	0.684051	0.969491	0.418537	0.457219	0.58257	0.886114	0.463518	0.785431	0.998086	1.29079	1.26865	0.846381	0.117072	0.112262	1.22039	0.609693	0	0.825001	2.53632	2.93725	2.39624	1.11167	0.533347	0.677532	1.19513	0.84575	3.94175	4.45344	3.53662	2.28699	2.23692	2.80176	BraA05g001850.3C	protein_coding	chrA05:1076740-1078387:-	gi|685303988|ref|XP_009142707.1|	1616	0	PREDICTED: probable WRKY transcription factor 54 [Brassica rapa]	gi|685303987|ref|XM_009144459.1|	1020	0	PREDICTED: Brassica rapa probable WRKY transcription factor 54 (LOC103866516), mRNA	Q93WU8	392
BraA05g040940.3C	1.89849	2.58726	2.14548	0.500542	0.847978	1.14719	0.858437	1.15419	0.919136	1.18834	0.950697	1.17035	2.71995	2.90931	1.93486	2.28918	1.75472	1.41695	0.481362	1.44289	0.998398	1.08469	0.88925	0.849598	0.799744	1.75391	1.61283	1.73706	2.63982	2.06826	0.723139	0.788668	1.59423	4.12371	4.48508	3.35096	BraA05g040940.3C	protein_coding	chrA05:27645729-27648084:-	gi|685313590|ref|XP_009147391.1|	1706	0	PREDICTED: probable WRKY transcription factor 58 isoform X1 [Brassica rapa]	gi|923632013|ref|XM_013895514.1|	848	0	PREDICTED: Brassica napus probable WRKY transcription factor 58 (LOC106453248), transcript variant X2, mRNA	Q93WU7	434
BraA06g028240.3C	22.2791	15.8533	20.8213	8.9444	8.55305	10.1988	25.3608	32.9379	25.8215	34.0057	37.2926	36.2819	12.5232	13.5013	14.9474	2.44217	4.33513	5.29077	79.5241	66.9972	73.1891	38.5726	26.8793	28.1801	48.7095	47.5577	44.5864	118.031	108.627	101.214	50.454	59.6612	51.3068	62.9651	66.0462	69.3684	BraA06g028240.3C	protein_coding	chrA06:19630149-19631364:+	gi|685321091|ref|XP_009150559.1|	956	3e-129	PREDICTED: probable WRKY transcription factor 51 isoform X2 [Brassica rapa]	gi|685321090|ref|XM_009152311.1|	606	0	PREDICTED: Brassica rapa probable WRKY transcription factor 51 (LOC103873907), transcript variant X2, mRNA	Q93WU9	283
BraA06g031500.3C	5.95632	6.64732	7.21976	5.15287	4.8674	6.12364	9.15449	7.12912	8.51591	25.2345	21.8828	23.2461	52.1698	61.7972	61.5415	46.6087	41.7059	56.4028	11.7042	9.24247	8.41824	6.65022	6.00126	6.2549	16.7655	18.1561	19.9241	29.8039	28.5563	31.4113	27.8918	28.1459	29.9974	15.831	16.4504	19.9641	BraA06g031500.3C	protein_coding	chrA06:21708987-21710349:-	gi|674945277|emb|CDX88077.1|	1550	0	BnaA06g26680D [Brassica napus]	gi|923647879|ref|XM_013787997.1|	936	0	PREDICTED: Brassica napus probable WRKY transcription factor 30 (LOC106348283), mRNA	Q9FL62	418
BraA06g033170.3C	2.82805	4.79618	1.92445	2.08774	1.92921	1.59497	6.24295	5.41583	7.45439	3.10997	3.2536	3.25433	2.98548	3.23591	3.89597	2.65225	3.59524	2.95503	5.92762	6.30484	7.33707	4.62473	4.32721	3.00673	3.03246	3.65775	5.06967	15.9766	16.2538	14.656	3.82051	4.78474	5.54124	9.67492	10.4269	9.31782	BraA06g033170.3C	protein_coding	chrA06:22702188-22703067:-	gi|685322620|ref|XP_009151123.1|	652	2e-84	PREDICTED: probable WRKY transcription factor 50 [Brassica rapa]	gi|685322619|ref|XM_009152875.1|	268	4e-137	PREDICTED: Brassica rapa probable WRKY transcription factor 50 (LOC103874451), mRNA	Q8VWQ5	201
BraA06g034700.3C	103.085	164.479	109.995	63.9111	61.5499	63.1098	184.851	177.529	176.698	151.167	153.184	150.881	99.8766	97.4918	104.744	58.9927	53.3379	51.1466	145.375	103.5	112.188	98.5647	126.957	127.995	115.706	127.643	134.115	213.588	219.223	224.94	96.229	102.902	94.8361	225.845	248.051	182.453	BraA06g034700.3C	protein_coding	chrA06:23567487-23569536:-	gi|688954249|ref|NP_001288867.1|	1628	0	probable WRKY transcription factor 48 [Brassica rapa]	gi|688954248|ref|NM_001301938.1|	1185	0	Brassica rapa probable WRKY transcription factor 48 (WRKY48), mRNA	Q9FGZ4	424
BraA06g041930.3C	0.992145	1.85322	0.828584	2.49692	4.40953	4.15425	1.9325	1.53535	2.54724	1.20883	0.875535	1.55686	3.99906	3.57985	3.99389	4.06024	3.56274	7.65738	1.64656	4.47861	3.32029	3.27058	3.64734	3.28778	4.54557	5.34676	6.71623	0.622117	0.41805	0.266255	5.96411	4.95949	6.98071	20.4851	24.5497	15.9335	BraA06g041930.3C	protein_coding	chrA06:27578940-27581374:+	gi|685326213|ref|XP_009101520.1|	1463	0	PREDICTED: probable WRKY transcription factor 8 [Brassica rapa]	gi|685326212|ref|XM_009103272.1|	972	0	PREDICTED: Brassica rapa probable WRKY transcription factor 8 (LOC103827736), mRNA	Q9FL26	398
BraA07g010430.3C	10.1582	3.52906	8.26497	2.03779	2.67811	2.83684	1.64885	1.80124	1.8294	3.79444	2.38181	3.28857	5.28412	6.08006	5.21519	4.76337	2.90763	3.26889	5.22586	4.40102	3.79366	3.29723	3.37893	1.84472	8.28771	9.20323	8.22188	5.51241	5.25416	4.41835	8.9498	7.16104	6.70672	1.11922	1.7561	2.78651	BraA07g010430.3C	protein_coding	chrA07:10321305-10323484:-	gi|685261333|ref|XP_009144762.1|	1845	0	PREDICTED: probable WRKY transcription factor 14 [Brassica rapa]	gi|685261332|ref|XM_009146514.1|	1191	0	PREDICTED: Brassica rapa probable WRKY transcription factor 14 (LOC103868412), mRNA	Q9SA80	519
BraA07g010810.3C	4.20478	4.52545	3.11166	9.50625	10.7564	8.69519	5.63067	4.36167	6.05621	6.61079	4.7619	5.97706	12.2068	11.84	13.6539	28.0967	31.6431	74.0041	6.39672	9.90672	10.8351	25.6733	27.9178	30.8939	18.2602	18.0146	17.9381	3.5217	3.99523	2.68936	28.7008	28.7895	26.879	67.6284	75.6904	60.021	BraA07g010810.3C	protein_coding	chrA07:10647517-10648977:-	gi|687568758|ref|NP_001288945.1|	1306	6e-180	probable WRKY transcription factor 71 [Brassica rapa]	gi|687568757|ref|NM_001302016.1|	834	0	Brassica rapa probable WRKY transcription factor 71 (WRKY71), mRNA	Q93WV4	323
BraA07g022390.3C	6.07102	4.22848	4.83146	18.7058	16.3787	18.2804	13.2281	16.9686	16.1574	13.6848	16.4255	14.2091	26.7221	25.277	32.6036	5.79013	8.40938	20.5629	10.6447	11.5743	10.498	23.9237	29.1274	23.7944	22.0672	19.2976	18.4105	12.2683	10.9694	13.264	31.6063	33.8393	30.2427	62.875	69.628	139.254	BraA07g022390.3C	protein_coding	chrA07:18047595-18049126:-	gi|687568640|ref|NP_001288847.1|	1339	0	probable WRKY transcription factor 70 [Brassica rapa]	gi|923662655|ref|XM_013792571.1|	819	0	PREDICTED: Brassica napus probable WRKY transcription factor 70 (LOC106352917), mRNA	Q9LY00	350
BraA07g026010.3C	54.0335	402.887	53.9525	32.6677	35.4552	33.5526	169.617	163.071	159.412	283.687	287.481	285.567	96.1731	116.555	97.944	83.8753	77.8724	29.9717	170.867	80.5928	84.886	32.5263	41.2633	43.7893	83.2808	67.6451	73.5292	248.334	250.897	242.106	151.444	154.922	169.088	204.645	201.304	177.259	BraA07g026010.3C	protein_coding	chrA07:19944940-19946478:+	gi|685333810|ref|XP_009104494.1|	1559	0	PREDICTED: probable WRKY transcription factor 40 [Brassica rapa]	gi|685333809|ref|XM_009106246.1|	888	0	PREDICTED: Brassica rapa probable WRKY transcription factor 40 (LOC103830462), mRNA	Q9SAH7	499
BraA07g033350.3C	11.8206	4.17645	10.0547	3.93896	2.86211	3.39503	2.34506	2.91113	2.9674	9.59127	9.20787	7.44574	7.74137	5.98779	6.56972	1.84764	3.87608	3.8598	9.87937	10.204	8.17335	6.06992	3.22978	3.36628	15.257	12.9764	11.7723	18.0104	15.5233	16.4779	12.8405	11.9208	10.4011	2.28822	1.899	2.53198	BraA07g033350.3C	protein_coding	chrA07:23849656-23851131:+	gi|688951866|ref|NP_001288948.1|	1238	5e-169	probable WRKY transcription factor 9 [Brassica rapa]	gi|685336027|ref|XM_009107115.1|	801	0	PREDICTED: Brassica rapa probable WRKY transcription factor 9 (LOC103831232), mRNA	Q9C9F0	345
BraA08g012800.3C	0	0.48462	0.101115	0.182825	0.337885	0.18623	0.482381	0.421571	0.223812	0	0.320535	0.100583	0.313728	0.531319	0.194956	0.278711	0.13493	0	23.0072	45.4745	44.698	35.4983	28.2578	30.3549	32.3977	44.3097	42.3122	4.09964	6.79536	5.65362	30.4277	28.9112	29.8914	25.7937	24.7072	22.1874	BraA08g012800.3C	protein_coding	chrA08:11021695-11022853:+	gi|685382537|ref|XP_009123732.1|	1366	0	PREDICTED: probable WRKY transcription factor 28 [Brassica rapa]	gi|685382536|ref|XM_009125484.1|	885	0	PREDICTED: Brassica rapa probable WRKY transcription factor 28 (LOC103848608), mRNA	Q8VWJ2	406
BraA08g015330.3C	196.807	122.976	215.367	147.226	154.299	146.679	112.737	114.201	107.156	44.3631	40.5976	40.4267	390.466	391.696	400.35	112.154	122.505	128.713	49.5887	85.1991	102.455	129.609	120.003	120.335	267.416	244.027	252.25	17.6125	17.1831	18.7981	278.892	257.112	237.655	77.2904	84.6083	106.607	BraA08g015330.3C	protein_coding	chrA08:12646157-12647679:+	gi|688953909|ref|NP_001288936.1|	1371	0	probable WRKY transcription factor 29 [Brassica rapa]	gi|688953908|ref|NM_001302007.1|	927	0	Brassica rapa probable WRKY transcription factor 29 (WRKY29), mRNA	Q9SUS1	432
BraA08g022420.3C	4.91973	2.31051	2.81216	3.45028	3.46796	3.42205	4.02472	4.18733	2.88996	5.37636	3.39601	5.09516	10.5949	11.927	11.1345	1.79942	1.74228	2.69883	1.49687	2.89157	2.06979	2.51852	1.50554	1.23292	2.63766	2.54523	3.35811	0.29086	1.18574	0.580919	3.14821	2.70518	2.02433	3.27263	3.84117	1.24158	BraA08g022420.3C	protein_coding	chrA08:16828880-16831213:+	gi|685347049|ref|XP_009109469.1|	1069	2e-143	PREDICTED: probable WRKY transcription factor 13 [Brassica rapa]	gi|685347048|ref|XM_009111221.1|	891	0	PREDICTED: Brassica rapa probable WRKY transcription factor 13 (LOC103835121), mRNA	Q9SVB7	313
BraA08g023980.3C	100.162	28.2652	92.6749	65.2553	58.8418	64.0592	45.1892	54.7057	50.2744	45.5368	42.2262	44.8475	90.4303	90.3344	96.9142	23.6931	26.435	48.9497	23.3033	33.0045	31.7922	34.3785	23.4056	22.7431	54.8968	38.9508	46.6034	19.5631	20.8859	20.4142	57.5762	54.8442	51.7958	11.2354	11.7324	14.0743	BraA08g023980.3C	protein_coding	chrA08:17596129-17597049:-	gi|923686001|ref|XP_013655098.1|	1245	3e-171	PREDICTED: probable WRKY transcription factor 65 [Brassica napus]	gi|985482193|ref|NM_001319316.1|	786	0	Brassica rapa probable WRKY transcription factor 65 (LOC103835284), mRNA	Q9LP56	429
BraA08g028490.3C	11.6216	1.04876	11.2867	5.10181	4.23334	6.31042	1.92301	1.98069	2.29429	3.72236	3.71173	3.32233	9.88627	8.83549	9.32626	3.4126	2.92001	2.28425	4.57732	7.20332	6.05234	7.22008	4.74767	4.94833	11.2517	9.78969	11.7275	4.44712	5.43884	3.5528	11.432	10.4993	11.883	1.76917	2.56943	3.38137	BraA08g028490.3C	protein_coding	chrA08:19873979-19876593:-	gi|685349375|ref|XP_009110313.1|	2240	0	PREDICTED: probable WRKY transcription factor 61 [Brassica rapa]	gi|685349374|ref|XM_009112065.1|	1554	0	PREDICTED: Brassica rapa probable WRKY transcription factor 61 (LOC103835878), mRNA	Q8VWV6	545
BraA08g030380.3C	3.61811	3.88042	2.84086	1.9904	1.34483	1.11184	5.08223	2.88701	2.27942	5.37998	3.52715	3.60301	2.57083	2.7616	3.081	2.83854	3.12749	2.63549	4.02232	3.2434	1.97591	1.1131	3.42202	1.66444	2.38746	2.2498	2.51858	6.85598	6.8369	6.91501	1.40995	2.28082	2.45398	14.2159	6.63974	5.70681	BraA08g030380.3C	protein_coding	chrA08:20617033-20618852:-	gi|685350035|ref|XP_009110565.1|	1684	0	PREDICTED: probable WRKY transcription factor 4 [Brassica rapa]	gi|685350034|ref|XM_009112317.1|	1109	0	PREDICTED: Brassica rapa probable WRKY transcription factor 4 (LOC103836088), mRNA	Q9XI90	445
BraA09g008290.3C	1.1981	2.59933	1.43562	2.1631	1.83598	2.35028	1.77561	1.21925	1.41229	3.22223	3.03394	3.96682	3.07949	2.96156	2.92173	1.61215	1.13524	1.56487	1.63776	1.58362	1.4245	1.77778	1.19557	1.72081	2.73696	3.20026	2.15494	1.38586	1.01405	1.38395	9.66686	9.36407	7.65501	3.01962	1.8641	3.17697	BraA09g008290.3C	protein_coding	chrA09:4729264-4730946:-	gi|685353967|ref|XP_009112138.1|	2641	0	PREDICTED: uncharacterized protein LOC103837532 [Brassica rapa]	gi|685353966|ref|XM_009113890.1|	1683	0	PREDICTED: Brassica rapa uncharacterized LOC103837532 (LOC103837532), mRNA	Q9SZ67	224
BraA09g008440.3C	0.864592	0.676748	0.882516	0.159566	0.1966	0.325076	3.1997	1.47176	2.53941	0.713086	1.67854	0.526719	0.730176	0.18549	1.36123	0.486508	0.471058	1.12926	0.701494	0.350457	0.363744	0.368837	0.377975	0.590925	0.927084	0.372749	0.178834	1.53347	2.4044	1.53136	0.553266	0.182849	0	2.62917	2.43767	4.36388	BraA09g008440.3C	protein_coding	chrA09:4831353-4832372:+	gi|685354025|ref|XP_009112160.1|	902	1e-121	PREDICTED: probable WRKY transcription factor 51 isoform X2 [Brassica rapa]	gi|685354024|ref|XM_009113912.1|	507	0	PREDICTED: Brassica rapa probable WRKY transcription factor 51 (LOC103837554), transcript variant X2, mRNA	Q93WU9	250
BraA09g021790.3C	4.81003	5.50541	4.72447	2.84742	1.9605	2.3886	0.0883866	0.0965556	0.307568	1.12278	0.587315	0.460743	1.53292	0.876182	0.62513	0.510682	0.494465	1.18538	1.4727	2.2992	2.1	1.0647	0.198378	0.413525	0.875835	0.78254	1.31404	0.268277	0.0841293	0.267908	0.483964	0.575803	0.444561	0.0862441	0.098415	0.286295	BraA09g021790.3C	protein_coding	chrA09:14248741-14252504:-	gi|685359594|ref|XP_009114360.1|	1405	0	PREDICTED: probable WRKY transcription factor 8 [Brassica rapa]	gi|685359593|ref|XM_009116112.1|	966	0	PREDICTED: Brassica rapa probable WRKY transcription factor 8 (LOC103839615), mRNA	Q9FL26	379
BraA09g025880.3C	2.9958	1.60384	3.1733	2.71232	3.27755	3.82546	2.36712	2.16494	1.59634	6.17709	5.66981	7.00187	5.07204	4.91136	5.50646	1.03371	1.7708	1.18125	6.87925	6.24349	7.13417	6.45036	4.81863	4.76474	9.33396	11.0271	10.6394	9.6355	11.1083	10.1228	12.3584	11.2967	11.6845	3.54518	3.06476	4.69553	BraA09g025880.3C	protein_coding	chrA09:17411363-17414228:-	gi|685360091|ref|XP_009114575.1|	2324	0	PREDICTED: LOW QUALITY PROTEIN: probable WRKY transcription factor 42 [Brassica rapa]	gi|685360090|ref|XM_009116327.1|	1537	0	PREDICTED: Brassica rapa probable WRKY transcription factor 42 (LOC103839840), mRNA	Q9XEC3	692
BraA09g026560.3C	0	0	0	0	0	0	0.0238763	0.0521659	0	0	0	0	0	0	0	0	0	0	0.174049	0.695622	0.515711	0.392198	0.214355	0.195488	0.157729	0.158543	0.354968	0.483139	0.340893	0.241237	0.156882	0.466633	0.144109	2.18996	2.39267	1.10851	BraA09g026560.3C	protein_coding	chrA09:17959240-17964194:-	gi|685360266|ref|XP_009114644.1|	5762	0	PREDICTED: probable WRKY transcription factor 19 isoform X1 [Brassica rapa]	gi|685360265|ref|XM_009116396.1|	3431	0	PREDICTED: Brassica rapa probable WRKY transcription factor 19 (LOC103839910), transcript variant X1, mRNA	Q9SZ67	1131
BraA09g033340.3C	2.59511	4.08466	1.95789	1.87413	3.20708	1.59086	14.7247	15.2453	13.7657	7.67737	8.39702	6.41553	8.81426	12.5876	9.99243	3.96814	6.76214	5.74747	14.6474	4.91655	7.47642	9.98778	9.8653	10.9249	15.3653	6.44538	8.28507	29.6845	28.6585	28.6445	23.9471	20.76	26.419	63.4757	69.1299	87.3225	BraA09g033340.3C	protein_coding	chrA09:26023182-26024132:-	gi|923700806|ref|XP_013659595.1|	1277	3e-176	PREDICTED: probable WRKY transcription factor 62 [Brassica napus]	gi|923700805|ref|XM_013804141.1|	777	0	PREDICTED: Brassica napus probable WRKY transcription factor 62 (LOC106364601), mRNA	Q9LZV6	343
BraA09g034360.3C	5.80166	1.752	6.14127	1.58628	1.79156	2.55838	1.25561	1.14305	1.53734	1.10764	0.695278	1.1636	2.94889	2.61232	3.17162	1.10836	1.07316	1.21617	4.06798	6.75017	5.57474	7.79167	7.82816	6.20085	15.1301	11.6571	10.5188	5.08149	5.71007	6.62504	12.0697	12.2697	11.508	1.97389	2.17478	3.91644	BraA09g034360.3C	protein_coding	chrA09:27038916-27041182:-	gi|685385167|ref|XP_009124606.1|	1796	0	PREDICTED: probable WRKY transcription factor 14 isoform X1 [Brassica rapa]	gi|685385169|ref|XM_009126359.1|	1224	0	PREDICTED: Brassica rapa probable WRKY transcription factor 14 (LOC103849604), transcript variant X2, mRNA	Q9SA80	500
BraA09g035200.3C	0.319962	3.75669	0.87092	1.18102	1.2126	1.00251	1.14257	2.26941	1.20483	0.329867	1.15034	0.866331	1.35109	1.3729	1.88908	3.00072	2.32434	6.82586	1.94703	4.6474	3.814	8.87227	6.87735	9.59786	6.51869	3.90842	5.18424	2.73238	2.96602	2.83357	4.20872	5.52617	4.59748	9.6285	10.1777	8.41122	BraA09g035200.3C	protein_coding	chrA09:27851354-27852439:-	gi|685361588|ref|XP_009115210.1|	1320	0	PREDICTED: probable WRKY transcription factor 71 [Brassica rapa]	gi|685361587|ref|XM_009116962.1|	822	0	PREDICTED: Brassica rapa probable WRKY transcription factor 71 (LOC103840455), mRNA	Q93WV4	338
BraA09g035620.3C	85.8917	18.8081	83.4759	62.8539	62.1554	64.4422	32.6809	35.8195	36.7779	60.4849	61.121	57.2001	134.191	136.238	138.75	21.4147	16.6482	37.1532	64.9109	101.565	106.116	124.785	94.7237	95.1831	176.098	138.684	147.323	45.3277	42.643	44.0626	142.445	156.035	143.911	57.9698	63.4998	64.9632	BraA09g035620.3C	protein_coding	chrA09:28164430-28165322:-	gi|685361706|ref|XP_009115259.1|	1251	3e-172	PREDICTED: probable WRKY transcription factor 65 [Brassica rapa]	gi|685361705|ref|XM_009117011.1|	786	0	PREDICTED: Brassica rapa probable WRKY transcription factor 65 (LOC103840503), mRNA	Q9LP56	418
BraA09g055240.3C	23.3195	10.1085	23.351	9.39749	7.88682	11.6535	35.2163	34.0744	34.1794	15.3683	13.531	16.4844	34.1219	41.9554	36.1628	4.36014	5.82994	9.63866	6.43656	12.1147	10.2455	8.81482	9.51715	11.9369	19.7825	16.2259	19.5381	12.3615	16.0075	16.8467	87.2055	89.2708	82.7082	34.6431	34.7306	47.9558	BraA09g055240.3C	protein_coding	chrA09:39885106-39886360:+	gi|685366643|ref|XP_009117362.1|	969	2e-131	PREDICTED: probable WRKY transcription factor 59 [Brassica rapa]	gi|685366642|ref|XM_009119114.1|	594	0	PREDICTED: Brassica rapa probable WRKY transcription factor 59 (LOC103842491), mRNA	Q9SJ09	230
BraA10g024220.3C	122.875	27.8674	122.991	42.2576	43.9995	45.7815	32.379	31.2035	30.6201	76.0838	79.9401	76.2222	151.176	142.883	138.727	31.0559	23.9403	30.5629	45.7995	48.0149	47.5523	43.4188	31.3603	35.6407	91.3383	91.6958	94.2279	66.4061	74.202	70.3259	122.015	124.893	113.222	27.1166	28.4748	37.3535	BraA10g024220.3C	protein_coding	chrA10:16625977-16628404:-	gi|923730011|ref|XP_013667721.1|	2297	0	PREDICTED: probable WRKY transcription factor 72 [Brassica napus]	gi|923730012|ref|XM_013812268.1|	1656	0	PREDICTED: Brassica napus probable WRKY transcription factor 72 (LOC106372130), mRNA	Q9LXG8	688
BraAnng003710.3C	229.997	313.901	228.597	96.381	94.6512	102.161	306.917	322.616	311.885	362.836	365.584	353.132	176.149	182.379	177.506	79.6822	84.1544	87.6476	160.631	133.079	138.503	96.7707	119.968	123.6	160.352	189.858	191.972	336.832	338.202	329.091	107.931	101.097	106.655	277.792	301.932	226.958	BraAnng003710.3C	protein_coding	chrScaffold0640:68110-69295:+	gi|687567582|ref|NP_001288959.1|	1332	0	probable WRKY transcription factor 23 [Brassica rapa]	gi|687567581|ref|NM_001302030.1|	969	0	Brassica rapa probable WRKY transcription factor 23 (WRKY23), mRNA	O22900	338
[truncated: 14 more columns]

## Sheet: Disease resistance protein(28)
The FPKM and annotation of disease resistance proteins involving clubroot resistances.
name	DH199S0d1	DH199S0d2	DH199S0d3	DH199S2d1	DH199S2d2	DH199S2d3	DH199S5d1	DH199S5d2	DH199S5d3	DH199S8d1	DH199S8d2	DH199S8d3	DH199S13d1	DH199S13d2	DH199S13d3	DH199S22d1	DH199S22d2	DH199S22d3	DH40R0d1	DH40R0d2	DH40R0d3	DH40R2d1	DH40R2d2	DH40R2d3	DH40R5d1	DH40R5d2	DH40R5d3	DH40R8d1	DH40R8d2	DH40R8d3	DH40R13d1	DH40R13d2	DH40R13d3	DH40R22d1	DH40R22d2	DH40R22d3	GeneName	Biotype	Position	NR:Seq-id	NR:Score	NR:Evalue	NR:Description	NT:Seq-id	NT:Score	NT:Evalue	NT:Description	Uniprot:UniProtKB-AC	Uniprot:Score
BraA01g021410.3C	0.199748	0.0781752	0.122334	0.0921623	0.158973	0.112654	0.369617	0.255018	0.270777	0.51483	0.323164	0.202815	0.168694	0.299979	0.137588	0.112399	0.244866	0.443524	0.628012	0.384593	0.399174	0.553885	0.611271	0.455076	0.706814	0.495172	0.47514	1.41712	1.38874	1.3169	0.340859	0.591415	0.469661	0.702333	0.649822	0.609119	BraA01g021410.3C	protein_coding	chrA01:11710227-11719965:+	gi|674910223|emb|CDY22932.1|	4096	0	BnaA01g18700D [Brassica napus]	gi|923522294|ref|XM_013816457.1|	1810	0	PREDICTED: Brassica napus disease resistance protein TAO1-like (LOC106376383), mRNA	F4JWM0	593
BraA01g022690.3C	0	0.0257591	0.026873	0	0	0	0.0256401	0	0	0.0542845	0.113583	0.0267314	0.0277927	0	0	0	0	0.0687732	0	0.0533579	0.0553809	0.252703	0.115095	0.0899697	0.112921	0.170255	0.163368	0.233474	0.366076	0.284964	0.0842359	0.0278391	0.0515851	0.150111	0.256943	0.359889	BraA01g022690.3C	protein_coding	chrA01:12719643-12723297:-	gi|923518310|ref|XP_013656461.1|	5102	0	PREDICTED: disease resistance protein TAO1-like [Brassica napus]	gi|923518309|ref|XM_013801007.1|	3057	0	PREDICTED: Brassica napus disease resistance protein TAO1-like (LOC106361276), mRNA	F4J339	945
BraA02g007180.3C	0.215853	0.276178	0.186431	0.551592	0.490829	0.405791	1.58473	1.76653	1.68813	0.616252	0.447717	0.859809	0.420681	0.534338	0.506497	0.8876	0.723716	0.563862	0.690433	0.790819	0.68109	0.814584	0.489972	0.624165	0.373889	0.286339	0.463649	0.588991	0.446363	0.718887	0.495843	0.89544	0.927214	1.19919	1.44044	2.19992	BraA02g007180.3C	protein_coding	chrA02:3374562-3387247:-	gi|227438239|gb|ACP30609.1|	6022	0	disease resistance protein [Brassica rapa subsp. pekinensis]	gi|685270353|ref|XM_009127951.1|	3343	0	PREDICTED: Brassica rapa putative disease resistance protein At4g11170 (LOC103851119), transcript variant X2, mRNA	Q9FI14	588
BraA02g007330.3C	6.40057	2.97019	5.30128	2.09253	1.99601	2.44092	2.27969	2.95733	3.18141	10.6334	9.03368	8.94983	9.53684	8.55298	7.98977	1.74936	1.89308	3.00958	4.30291	4.63292	4.69316	2.65248	2.07863	1.54153	6.07884	10.4465	9.22956	14.6678	12.5785	12.6683	4.64194	4.13824	3.40404	3.30189	2.69699	2.80753	BraA02g007330.3C	protein_coding	chrA02:3471038-3473926:-	gi|685270401|ref|XP_009126220.1|	4179	0	PREDICTED: putative disease resistance protein At4g11170 isoform X1 [Brassica rapa]	gi|685270400|ref|XM_009127972.1|	2397	0	PREDICTED: Brassica rapa putative disease resistance protein At4g11170 (LOC103851141), transcript variant X1, mRNA	O82500	773
BraA02g021310.3C	13.6557	15.4988	16.4478	6.40144	6.39665	5.64781	3.777	5.28836	3.82572	7.71499	7.42323	7.09906	4.78606	5.03909	5.37495	7.45357	7.73768	6.27828	5.53983	9.13318	10.054	6.4081	6.50718	7.46664	5.38852	7.00593	6.77899	8.34251	8.50665	8.27728	5.01007	5.83373	5.5119	18.3753	19.7838	14.5316	BraA02g021310.3C	protein_coding	chrA02:12511331-12515265:+	gi|685273838|ref|XP_009127957.1|	2621	0	PREDICTED: putative disease resistance protein At4g11170 [Brassica rapa]	gi|685273837|ref|XM_009129709.1|	1123	0	PREDICTED: Brassica rapa putative disease resistance protein At4g11170 (LOC103852811), mRNA	Q9FI14	174
BraA02g021320.3C	2.4079	2.40949	2.56954	2.32297	2.73767	2.10904	1.91869	1.33912	1.54552	2.20035	2.30197	3.00052	2.25308	1.64371	1.99246	1.46271	0.894481	1.07217	2.6641	3.05009	4.66226	2.8015	4.30637	3.05459	1.5257	3.06715	2.43369	2.91187	3.2467	3.1771	1.34241	1.6203	1.76925	4.88846	4.62882	5.58186	BraA02g021320.3C	protein_coding	chrA02:12522687-12524510:+	gi|685275143|ref|XP_009128555.1|	2500	0	PREDICTED: putative disease resistance protein At4g11170 [Brassica rapa]	gi|685275142|ref|XM_009130307.1|	1579	0	PREDICTED: Brassica rapa putative disease resistance protein At4g11170 (LOC103853389), mRNA	F4JWM0	162
BraA02g033300.3C	1.25093	0.509975	1.02859	0.737496	1.06669	0.914541	0.507619	0.628472	0.471043	2.93756	2.2487	2.25802	1.13716	1.04369	0.341926	0.537704	0.709948	1.18002	1.62111	0.88031	0.657854	0.333532	0.379773	0.593736	0.968753	0.374521	0.682803	1.23261	1.38508	1.47026	1.03767	1.35952	1.15745	0.924586	0.640575	0.730772	BraA02g033300.3C	protein_coding	chrA02:22988009-22991378:-	gi|685275866|ref|XP_009128906.1|	4393	0	PREDICTED: protein VARIATION IN COMPOUND TRIGGERED ROOT growth response-like isoform X3 [Brassica rapa]	gi|685275865|ref|XM_009130658.1|	2523	0	PREDICTED: Brassica rapa protein VARIATION IN COMPOUND TRIGGERED ROOT growth response-like (LOC103853747), transcript variant X3, mRNA	P0DKH6	936
BraA03g008470.3C	0.485625	0.223598	0.554009	1.2653	1.03931	1.1009	0.695516	0.303919	0.580861	2.9156	3.45079	2.95848	1.41735	1.40958	1.43358	2.77281	2.02329	2.12672	1.27476	0.434218	0.420635	0.487456	1.52982	1.07383	0.612619	0.400258	0.620414	1.1822	1.58883	1.51789	0.731198	0.634341	0.615694	1.24873	1.14616	1.44183	BraA03g008470.3C	protein_coding	chrA03:3638481-3641965:-	gi|674881039|emb|CDY51234.1|	5334	0	BnaA03g07040D [Brassica napus]	gi|227438170|gb|FJ842794.1|	2038	0	Brassica rapa subsp. pekinensis isolate BrTNL44 disease resistance protein gene, complete cds	F4JWM0	904
BraA03g032230.3C	3.58881	14.1207	3.03523	3.52459	3.58484	3.80709	5.94175	4.82727	4.57539	6.95055	7.16095	7.00151	4.95223	6.29707	5.07013	5.69769	5.6215	4.82136	7.01955	3.92251	4.09818	3.5541	4.70678	4.67211	3.84821	3.48128	3.57904	14.7512	15.4221	14.7309	2.95269	2.65644	3.089	9.42739	9.17332	8.08657	BraA03g032230.3C	protein_coding	chrA03:15977118-15981310:-	gi|923592634|ref|XP_013739300.1|	5266	0	PREDICTED: disease resistance protein TAO1-like, partial [Brassica napus]	gi|923592633|ref|XM_013883846.1|	3169	0	PREDICTED: Brassica napus disease resistance protein TAO1-like (LOC106442119), partial mRNA	F4JWM0	885
BraA03g032240.3C	3.34532	7.6283	3.16069	3.34214	3.52056	3.04055	5.439	6.23583	5.27822	7.1543	7.69344	7.01794	2.1306	1.83876	1.90437	2.91698	3.3139	2.56387	7.51468	5.60334	5.08881	2.86014	3.35404	3.81073	4.26897	5.51276	4.60351	17.653	17.4276	15.9148	2.53584	2.86503	3.2503	6.51572	7.34528	6.36674	BraA03g032240.3C	protein_coding	chrA03:15982576-15986002:-	gi|227438227|gb|ACP30603.1|	5196	0	disease resistance protein [Brassica rapa subsp. pekinensis]	gi|923548957|ref|XM_013880489.1|	3171	0	PREDICTED: Brassica napus disease resistance protein TAO1-like (LOC106439116), mRNA	F4JWM0	864
BraA03g042380.3C	253.76	475.808	247.438	406.007	406.127	405.093	590.328	616.608	598.172	146.633	152.567	153.489	212.503	210.431	197.544	255.078	258.835	115.421	196.037	244.234	254.883	269.973	273.01	270.206	245.6	260.858	272.811	213.742	217.005	216.049	447.781	450.865	463.863	233.022	231.014	261.36	BraA03g042380.3C	protein_coding	chrA03:21265473-21267196:-	gi|685290509|ref|XP_009136215.1|	1907	0	PREDICTED: calmodulin-like protein 12 [Brassica rapa]	gi|685290508|ref|XM_009137967.1|	949	0	PREDICTED: Brassica rapa calmodulin-like protein 12 (LOC103860375), mRNA	Q9CAK1	210
BraA03g049870.3C	7.1343	6.98035	5.46165	3.29171	3.11975	3.35301	6.81449	7.0064	4.80461	16.9735	16.7215	21.7315	2.4622	3.38498	2.16007	5.21112	5.04563	2.68797	10.8534	6.53446	6.205	4.09703	5.24818	4.37599	2.50095	6.21073	4.96622	22.1709	18.95	21.1954	5.85301	6.96371	6.58619	5.21514	5.65355	5.04936	BraA03g049870.3C	protein_coding	chrA03:25559821-25560459:-	gi|923553940|ref|XP_013737549.1|	903	1e-109	PREDICTED: disease resistance protein TAO1-like [Brassica napus]	gi|923553939|ref|XM_013882095.1|	627	0	PREDICTED: Brassica napus disease resistance protein TAO1-like (LOC106440435), mRNA	Q9FI14	207
BraA04g018500.3C	4.48356	10.1053	3.89548	2.06868	1.88125	1.2292	5.84805	6.18979	6.05979	6.02558	6.27507	6.04276	2.19753	1.80357	1.8908	2.2526	1.7812	2.0566	4.14122	4.78686	5.52974	2.19163	2.30427	2.58406	3.14785	5.43651	5.38218	14.3844	12.6171	13.1566	1.62241	2.03188	1.96094	4.18461	3.79118	3.76044	BraA04g018500.3C	protein_coding	chrA04:13986930-13990538:+	gi|685299731|ref|XP_009140612.1|	5707	0	PREDICTED: putative disease resistance protein At4g11170 [Brassica rapa]	gi|685299730|ref|XM_009142364.1|	3285	0	PREDICTED: Brassica rapa putative disease resistance protein At4g11170 (LOC103864602), mRNA	Q9CAK1	1109
BraA07g030350.3C	6.69382	5.65917	6.92104	6.11698	6.99481	6.37344	5.0634	4.95518	5.38377	5.67271	5.51412	5.08095	4.23072	4.36871	4.2633	8.77662	8.70445	9.16738	12.1277	15.5642	16.0631	14.8325	9.09158	8.51344	19.7676	16.1806	16.8478	8.62359	8.45421	7.73776	6.21498	5.74964	6.09098	2.28505	1.8793	2.25513	BraA07g030350.3C	protein_coding	chrA07:22201401-22210761:-	gi|685335124|ref|XP_009104999.1|	4566	0	PREDICTED: putative disease resistance protein At4g11170 [Brassica rapa]	gi|685335123|ref|XM_009106751.1|	2778	0	PREDICTED: Brassica rapa putative disease resistance protein At4g11170 (LOC103830929), mRNA	Q9FI14	890
BraA08g021430.3C	11.2521	12.2766	10.4112	4.233	3.95759	4.36256	9.09264	10.7943	8.23021	7.26074	7.9744	7.507	3.9595	3.61817	2.89418	3.18858	2.94031	4.54646	8.2921	10.4728	10.1036	6.33118	6.72398	6.73153	3.67461	5.52583	4.99531	9.94402	10.1055	10.541	4.08657	3.36692	4.07108	8.84659	10.1828	10.4132	BraA08g021430.3C	protein_coding	chrA08:16209311-16213409:+	gi|923691089|ref|XP_013656609.1|	4944	0	PREDICTED: disease resistance protein TAO1-like isoform X4 [Brassica napus]	gi|923691088|ref|XM_013801155.1|	3067	0	PREDICTED: Brassica napus probable disease resistance protein RPP1 (LOC106361416), transcript variant X4, mRNA	Q9FI14	859
BraA09g014880.3C	5.05561	10.2933	4.77264	1.67194	1.36224	1.31851	4.29754	4.91236	3.79641	10.1531	9.61337	9.40597	1.4808	1.59874	1.92665	1.80884	1.59218	3.24437	6.49075	5.62659	4.7334	2.618	2.77868	2.46337	2.22482	2.48828	2.32717	11.9212	13.0843	12.7962	2.05704	1.54507	2.29038	6.10953	6.21117	5.83851	BraA09g014880.3C	protein_coding	chrA09:8725817-8730106:+	gi|685355547|ref|XP_009112783.1|	5173	0	PREDICTED: putative disease resistance protein At4g11170 [Brassica rapa]	gi|685355546|ref|XM_009114535.1|	2977	0	PREDICTED: Brassica rapa putative disease resistance protein At4g11170 (LOC103838108), mRNA	Q9CAK1	1065
BraA09g014900.3C	2.66164	1.18129	2.01661	2.12695	2.37101	2.39869	1.17583	1.08015	1.39489	5.1769	4.58731	4.90352	2.83877	2.47251	2.51109	1.11942	1.23338	0.645112	3.11687	2.94746	2.65516	2.01925	1.4395	1.3128	2.73633	3.31239	3.17838	4.86678	6.58799	5.40009	2.45827	3.30776	2.06994	1.90353	1.339	2.19287	BraA09g014900.3C	protein_coding	chrA09:8752740-8758103:+	gi|685355545|ref|XP_009112782.1|	5497	0	PREDICTED: putative disease resistance protein At4g11170 [Brassica rapa]	gi|685355544|ref|XM_009114534.1|	3192	0	PREDICTED: Brassica rapa putative disease resistance protein At4g11170 (LOC103838107), mRNA	Q9CAK1	1301
BraA09g014910.3C	0.0275951	0	0.0281672	0.0254643	0	0.0259385	0.0806246	0	0.0935192	0.0853481	0.119053	0.140094	0.0582624	0.0296014	0.0271539	0	0	0	0.0279869	0.0838913	0.174144	0.0588606	0	0.0314342	0.0591793	0.0594849	0.0856176	0.163145	0.127902	0.244381	0.0588617	0.0583597	0.0540694	0.708033	0.778027	0.812475	BraA09g014910.3C	protein_coding	chrA09:8760510-8764054:+	gi|685355540|ref|XP_009112779.1|	5515	0	PREDICTED: putative disease resistance protein At4g11170 isoform X1 [Brassica rapa]	gi|685355539|ref|XM_009114531.1|	3177	0	PREDICTED: Brassica rapa putative disease resistance protein At4g11170 (LOC103838106), transcript variant X1, mRNA	Q9CAK1	1251
BraA09g014920.3C	1.00174	1.99405	1.02251	0.733137	0.903289	1.23383	1.85027	2.86654	2.61445	1.13959	1.22947	1.54322	1.02104	1.18573	0.951735	0.874679	0.941003	1.21816	1.01596	1.99525	2.25255	2.13672	2.75596	2.95113	1.92606	2.45723	1.85768	1.0211	1.44094	1.39359	1.25259	1.27843	1.31981	4.333	3.82074	3.16007	BraA09g014920.3C	protein_coding	chrA09:8765514-8768927:-	gi|674894648|emb|CDY38216.1|	4099	0	BnaA09g11730D [Brassica napus]	gi|923707845|ref|XM_013806101.1|	1236	0	PREDICTED: Brassica napus disease resistance protein RML1B-like (LOC106366497), mRNA	Q9CAK1	514
BraA09g016880.3C	22.9742	31.1102	25.7017	15.773	12.7468	11.0567	19.3317	18.3808	15.9871	9.66366	9.91171	13.8095	6.98489	9.06919	10.8513	2.32698	1.00137	4.56109	13.421	17.1349	20.4909	6.86059	5.62446	4.81536	9.26268	12.48	10.0743	14.8503	16.8671	11.3937	4.90052	4.66437	4.32147	18.1644	15.3466	11.9824	BraA09g016880.3C	protein_coding	chrA09:10417631-10418107:-	gi|685356609|ref|XP_009113178.1|	815	2e-101	PREDICTED: putative disease resistance protein At4g11170 isoform X2 [Brassica rapa]	gi|923699851|ref|XM_013803900.1|	474	0	PREDICTED: Brassica napus putative disease resistance protein At4g11170 (LOC106364285), mRNA	O82500	270
BraA09g017440.3C	1.03314	7.22035	1.35586	0.408586	0	0.554927	4.45594	6.28099	3.00112	6.69508	5.88996	5.84445	1.24646	3.32477	2.75941	0.622878	1.60826	1.92773	5.08937	1.79477	2.48375	1.73148	2.58092	2.85813	2.3739	0.477231	2.13698	13.9613	14.5025	15.83	2.9908	4.83811	2.89189	6.45176	7.68234	7.91504	BraA09g017440.3C	protein_coding	chrA09:10840201-10841428:+	gi|685356844|ref|XP_009113262.1|	713	2e-92	PREDICTED: putative disease resistance protein At4g11170 isoform X1 [Brassica rapa]	gi|685356851|ref|XM_009115017.1|	492	0	PREDICTED: Brassica rapa putative disease resistance protein At4g11170 (LOC103838569), transcript variant X4, mRNA	Q9C7X0	189
BraA09g020890.3C	1.76442	1.07897	1.57587	2.13698	1.62992	2.28044	1.50357	1.29057	1.24575	0.909521	0.713643	1.00772	1.16415	0.709763	1.19364	0.465395	0.600821	0.720172	8.61183	9.94571	11.1347	9.64403	8.55721	8.66765	12.1794	9.15203	12.3173	2.71652	4.19122	4.01492	8.58571	7.69621	8.64294	4.61097	3.46792	3.94259	BraA09g020890.3C	protein_coding	chrA09:13539709-13542226:+	gi|685358432|ref|XP_009113885.1|	1200	2e-164	PREDICTED: protein PHLOEM PROTEIN 2-LIKE A8 [Brassica rapa]	gi|685358431|ref|XM_009115637.1|	795	0	PREDICTED: Brassica rapa protein PHLOEM PROTEIN 2-LIKE A8 (LOC103839148), mRNA	Q0WSX8	117
BraA09g020920.3C	6.17136	3.19669	7.78148	7.36978	7.42927	5.9715	3.53547	2.89667	2.46054	5.61389	6.85201	6.6347	9.00588	11.6824	11.6096	2.29807	3.21402	4.97858	2.39314	3.12691	2.48182	2.90373	0.991891	3.3082	4.47649	2.93453	3.56669	1.60966	1.68259	1.60745	5.4204	7.10157	3.73432	1.03493	0.78732	2.0995	BraA09g020920.3C	protein_coding	chrA09:13567531-13568013:+	gi|674875526|emb|CDY57301.1|	839	6e-113	BnaC03g73350D [Brassica napus]	gi|685358420|ref|XM_009115633.1|	474	0	PREDICTED: Brassica rapa putative disease resistance protein At4g11170 (LOC103839142), mRNA	Q9SYC9	239
BraA09g020940.3C	356.894	127.245	354.405	147.87	137.399	143.187	194.664	147.982	138.798	195.665	201.654	189.097	378.039	365.436	374.94	15.5582	18.1429	24.8837	152.448	201.242	222.627	323.634	363.68	356.337	291.281	271.816	279.354	99.1125	101.249	98.42	245.378	242.261	243.986	255.459	271.901	318.41	BraA09g020940.3C	protein_coding	chrA09:13585566-13587302:-	gi|674883290|emb|CDY49140.1|	1802	0	BnaC09g52030D [Brassica napus]	gi|685358414|ref|XM_009115631.1|	580	0	PREDICTED: Brassica rapa protein PHLOEM PROTEIN 2-LIKE A6-like (LOC103839140), mRNA	Q9FHE8	440
BraA09g022120.3C	0.90381	0.147384	0.768789	0.139004	0.256897	0.283185	0.244506	0.160262	0.141805	1.63063	1.08314	1.09612	0.31804	0.296243	0.0741134	0	0	0.163957	0.203698	0.152648	0.132029	0	0.0274389	0.0857958	0.0807614	0.162357	0.0519296	0.494761	0.48873	0.395264	0.0535521	0.185833	0.024596	0.286295	0.435596	0.158397	BraA09g022120.3C	protein_coding	chrA09:14501183-14505705:+	gi|685359579|ref|XP_009114358.1|	5947	0	PREDICTED: protein VARIATION IN COMPOUND TRIGGERED ROOT growth response-like [Brassica rapa]	gi|685359578|ref|XM_009116110.1|	3492	0	PREDICTED: Brassica rapa protein VARIATION IN COMPOUND TRIGGERED ROOT growth response-like (LOC103839607), mRNA	P0DKH6	1312
BraA09g022170.3C	10.4626	11.4723	11.2319	4.99383	6.76812	4.06947	8.95979	10.5556	12.2268	10.7865	8.75535	9.89061	6.28424	5.80516	3.90513	0.50753	0.245706	2.35612	5.85444	5.84961	6.26111	3.27058	2.36584	2.05486	5.416	8.16595	5.78342	12.9756	9.86597	12.2477	5.00216	4.19649	5.65526	4.97128	4.10792	5.31118	BraA09g022170.3C	protein_coding	chrA09:14524151-14524636:+	gi|685359542|ref|XP_009114345.1|	823	4e-100	PREDICTED: protein VARIATION IN COMPOUND TRIGGERED ROOT growth response-like [Brassica rapa]	gi|685359541|ref|XM_009116097.1|	459	0	PREDICTED: Brassica rapa protein VARIATION IN COMPOUND TRIGGERED ROOT growth response-like (LOC103839595), mRNA	F4KHH8	233
BraA09g042730.3C	0.024373	0.023847	0.0497565	0.134946	0.0277109	0.0458197	0.118684	0	0	0.175893	0.315455	0.34646	0.0257297	0.078435	0.263816	0.102861	0.232386	0.0636682	0.148314	0.0246986	0.025635	0	0.0799138	0.0832914	0.261346	0.210157	0.277275	0.552367	0.293716	0.431692	0.285939	0.180409	0.286536	0.046323	0.15858	0.128144	BraA09g042730.3C	protein_coding	chrA09:33160696-33164934:-	gi|685363075|ref|XP_009115830.1|	6139	0	PREDICTED: putative disease resistance protein At4g11170 [Brassica rapa]	gi|685363074|ref|XM_009117582.1|	3597	0	PREDICTED: Brassica rapa putative disease resistance protein At4g11170 (LOC103841070), mRNA	Q9FI14	1031
BraA10g028610.3C	1.97299	0.979198	1.16748	1.21377	1.23538	1.50515	0.835435	0.699697	0.613731	0.825421	0.462611	0.638729	1.69041	1.65634	0.984794	0.603374	0.584213	0.709602	0.986004	1.01417	1.02254	1.37231	1.37506	1.00974	1.56371	2.21898	2.60237	0.929783	0.874714	0.928504	1.89078	2.26772	1.70882	0.19021	0.37209	0.511147	BraA10g028610.3C	protein_coding	chrA10:18470114-18473925:+	gi|685378885|ref|XP_009122186.1|	5163	0	PREDICTED: putative disease resistance protein At4g11170 [Brassica rapa]	gi|685378884|ref|XM_009123938.1|	1557	0	PREDICTED: Brassica rapa putative disease resistance protein At4g11170 (LOC103846927), mRNA	P0DKH6	750
[truncated: 14 more columns]

## Sheet: Antioxidation(64)
The FPKM and annotation of antioxidation genes involving clubroot resistances.
	ID	DH199S0d1	DH199S0d2	DH199S0d3	DH199S2d1	DH199S2d2	DH199S2d3	DH199S5d1	DH199S5d2	DH199S5d3	DH199S8d1	DH199S8d2	DH199S8d3	DH199S13d1	DH199S13d2	DH199S13d3	DH199S22d1	DH199S22d2	DH199S22d3	DH40R0d1	DH40R0d2	DH40R0d3	DH40R2d1	DH40R2d2	DH40R2d3	DH40R5d1	DH40R5d2	DH40R5d3	DH40R8d1	DH40R8d2	DH40R8d3	DH40R13d1	DH40R13d2	DH40R13d3	DH40R22d1	DH40R22d2	DH40R22d3	GeneName	Biotype	Position	NR:Seq-id	NR:Score	NR:Evalue	NR:Description	NT:Seq-id	NT:Score	NT:Evalue	NT:Description	Uniprot:UniProtKB-AC
Proteinkinase (Pkinase)	BraA07g007770.3C	31.9695	71.7226	30.8353	19.2991	21.6165	18.2023	48.3486	46.2992	46.5354	54.6658	52.8612	55.6973	23.4162	24.7761	24.1134	18.4252	20.9093	18.5787	35.7086	30.1131	29.0329	18.2494	22.3957	23.5829	27.4846	45.4623	46.5362	60.0187	57.7694	56.4023	24.8587	24.6467	27.6639	89.6021	88.0438	69.677	BraA07g007770.3C	protein_coding	chrA07:7953483-7954803:-	gi|685328451|ref|XP_009102416.1|	1663	0	PREDICTED: serine/threonine-protein kinase OXI1 [Brassica rapa]	gi|685328450|ref|XM_009104168.1|	1245	0	PREDICTED: Brassica rapa serine/threonine-protein kinase OXI1 (LOC103828561), mRNA	Q9LSF1
	BraA09g062100.3C	161.358	92.9993	163.631	150.006	150.64	153.42	203.782	213.487	215.156	140.617	142.678	147.78	160.553	157.962	155.087	132.869	131.183	105.612	76.7122	87.7768	96.848	99.4838	101.031	101.883	120.548	126.312	122.195	49.7558	50.508	46.3217	121.661	116.467	120.457	94.574	99.4612	108.119	BraA09g062100.3C	protein_coding	chrA09:43193459-43196458:-	gi|685368776|ref|XP_009118284.1|	4657	0	PREDICTED: receptor-like protein kinase HAIKU2 [Brassica rapa]	gi|685368775|ref|XM_009120036.1|	2922	0	PREDICTED: Brassica rapa receptor-like protein kinase HAIKU2 (LOC103843324), mRNA	F4I2N7
Catalase (CAT)	BraA01g003280.3C	0.471342	0.0576463	0.240557	0.0543683	0	0.0553808	0	0	0.066557	0	0	0	0	0.126403	0	0	0	0	27.2479	28.8375	25.2212	12.3787	9.40137	10.537	20.3428	13.7165	14.2584	5.92158	6.49932	6.6671	8.16885	6.91544	6.75339	2.79946	3.83342	3.71722	BraA01g003280.3C	protein_coding	chrA01:1631727-1633925:+	gi|685256782|ref|XP_009106100.1|	2624	0	PREDICTED: catalase-2 [Brassica rapa]	gi|685256781|ref|XM_009107852.1|	1460	0	PREDICTED: Brassica rapa catalase-2 (LOC103831878), mRNA	P25819
	BraA08g027750.3C	92.1746	93.9554	89.7291	8.64247	7.14378	8.24624	21.7639	23.7123	26.45	70.5225	80.2366	75.1125	19.8366	19.0122	21.2316	56.203	57.1633	33.6786	132.019	58.0259	64.403	16.6264	19.8241	20.1218	36.1025	18.9111	18.1461	100.754	103.028	106.273	41.6618	40.9303	45.2385	22.9262	21.9835	43.0704	BraA08g027750.3C	protein_coding	chrA08:19527255-19530473:-	gi|685349136|ref|XP_009110221.1|	2664	0	PREDICTED: catalase-3 [Brassica rapa]	gi|923555142|ref|XM_013882469.1|	1479	0	PREDICTED: Brassica napus catalase-3 (LOC106440733), mRNA	Q42547
peroxidase (POD)	BraA01g002610.3C	9.67098	20.7759	11.0518	14.7444	15.059	16.0071	18.0182	15.7691	15.7936	19.5073	17.0068	17.9312	10.9861	11.0507	9.82668	15.9708	17.0386	18.5354	6.2901	6.49796	5.85981	10.8747	10.5697	11.9744	9.35555	8.38416	9.567	13.7761	11.9857	11.2746	6.50253	9.33713	8.7537	4.49524	2.7358	5.19519	BraA01g002610.3C	protein_coding	chrA01:1304217-1305607:-	gi|685256590|ref|XP_009148286.1|	1352	0	PREDICTED: LOW QUALITY PROTEIN: L-ascorbate peroxidase 5, peroxisomal [Brassica rapa]	gi|685256589|ref|XM_009150038.1|	816	0	PREDICTED: Brassica rapa L-ascorbate peroxidase 5, peroxisomal (LOC103871729), mRNA	Q7XZP5
	BraA01g007530.3C	102.776	61.9359	105.09	57.9162	54.5918	62.0375	36.6046	39.031	44.1857	124.498	123.071	121.152	75.8434	74.6561	73.4384	10.7518	13.4723	39.6959	82.6219	76.4487	68.4712	35.7698	22.7012	26.5286	48.3048	42.6424	45.102	58.5648	62.9313	63.2621	59.5535	67.4127	62.8093	8.03212	8.19055	8.88777	BraA01g007530.3C	protein_coding	chrA01:3636357-3637921:-	gi|923520834|ref|XP_013667869.1|	1653	0	PREDICTED: peroxidase 45-like [Brassica napus]	gi|685257829|ref|XM_009129773.1|	972	0	PREDICTED: Brassica rapa peroxidase 45 (LOC103852874), mRNA	Q96522
	BraA01g012680.3C	430.426	328.643	430.454	591.643	600.958	615.651	590.641	643.731	662.931	4340.68	4392.95	4255.14	1244.78	1246.08	1294.8	2277.51	2316.45	1570.8	542.056	284.362	294.958	343.866	360.756	371.19	498.064	395.898	401.365	1095.86	1120.79	1066.12	941.121	925.461	973.412	178.334	193.86	255.18	BraA01g012680.3C	protein_coding	chrA01:6606556-6608294:-	gi|685259409|ref|XP_009135472.1|	1780	0	PREDICTED: peroxidase 42 [Brassica rapa]	gi|685259408|ref|XM_009137224.1|	996	0	PREDICTED: Brassica rapa peroxidase 42 (LOC103859651), mRNA	Q9SB81
	BraA01g016770.3C	5.22843	1.6443	4.57442	2.15389	1.48612	1.40416	0.727425	1.78797	1.16018	15.5933	12.789	19.0544	8.27921	5.50841	7.44164	0	0.127171	0.365838	2.9354	3.1222	3.43698	1.99148	1.42858	1.59531	7.30827	6.74222	7.24194	7.54377	7.35661	7.809	18.2224	18.5606	18.0194	2.66172	1.31618	1.76716	BraA01g016770.3C	protein_coding	chrA01:8906664-8908062:+	gi|685260429|ref|XP_009139829.1|	1550	0	PREDICTED: peroxidase 44 [Brassica rapa]	gi|685260428|ref|XM_009141581.1|	936	0	PREDICTED: Brassica rapa peroxidase 44 (LOC103863825), mRNA	Q93V93
	BraA01g032000.3C	1.15122	0.606509	0.632737	6.70082	6.4437	5.99321	2.1561	1.79008	2.30086	8.94707	9.74231	8.63181	2.52408	2.37484	2.09134	0.249151	0.241239	1.04098	7.99331	5.20482	4.47075	9.5389	7.93633	8.37263	8.54603	9.83096	9.79958	17.9751	19.209	18.0375	17.7559	17.3235	15.6162	2.94537	4.6094	4.37655	BraA01g032000.3C	protein_coding	chrA01:21793534-21795238:-	gi|685264371|ref|XP_009109348.1|	1769	0	PREDICTED: peroxidase 30 [Brassica rapa]	gi|685264370|ref|XM_009111100.1|	990	0	PREDICTED: Brassica rapa peroxidase 30 (LOC103835007), mRNA	Q9LSY7
	BraA01g043550.3C	0	0	0	0	0	0	0	0	0	0	0	0	0	0	0	0	0	0	0.0932016	0	0	0.686059	0.502184	0.418727	0.0985391	0.297144	0.380164	0.181101	0.170375	0.0904261	0.392041	0.0971744	0.540184	0.611303	0.298959	0.48316	BraA01g043550.3C	protein_coding	chrA01:28890616-28891924:+	gi|685327650|ref|XP_009102117.1|	1663	0	PREDICTED: peroxidase 57 [Brassica rapa]	gi|685327649|ref|XM_009103869.1|	954	0	PREDICTED: Brassica rapa peroxidase 57 (LOC103828256), mRNA	Q43729
	BraA01g044650.3C	4.74877	0.178704	7.64369	4.29782	3.84168	2.74689	0.711513	1.26307	1.75378	54.8892	47.1804	60.5491	17.8351	21.0618	22.8251	8.86433	9.82671	4.29403	16.2083	10.4573	10.2775	8.27865	4.89064	7.80206	21.5431	21.3591	21.345	48.9517	53.0787	44.8406	52.0104	45.0968	46.8812	0.867832	1.18836	1.34439	BraA01g044650.3C	protein_coding	chrA01:29419439-29420652:-	gi|923538050|ref|XP_013721706.1|	1622	0	PREDICTED: peroxidase 27-like [Brassica napus]	gi|923538049|ref|XM_013866252.1|	960	0	PREDICTED: Brassica napus peroxidase 27-like (LOC106425524), mRNA	Q43735
	BraA02g001710.3C	8.00266	10.8212	8.53569	86.2934	90.7818	87.4779	41.7713	35.8741	43.881	93.7209	100.862	94.0369	349.981	349.649	371.173	333.813	347.829	331.425	11.2169	6.83392	5.76898	36.537	50.316	44.6582	62.8637	24.7132	24.5504	34.5541	35.8417	37.4264	103.188	100.786	104.3	101.512	102.577	198.178	BraA02g001710.3C	protein_coding	chrA02:844735-846576:-	gi|685269169|ref|XP_009125598.1|	1549	0	PREDICTED: peroxidase P7 [Brassica rapa]	gi|685269168|ref|XM_009127350.1|	975	0	PREDICTED: Brassica rapa peroxidase P7 (LOC103850580), mRNA	P00434
	BraA02g005900.3C	34.079	6.21954	33.7041	20.3676	19.2727	21.1618	18.8304	18.1285	17.9523	114.777	121.697	116.805	52.3796	59.4757	54.7319	0.993593	0.48102	4.61258	23.4598	29.0768	26.6506	15.9129	7.14042	10.3587	29.0634	24.1701	25.475	56.5463	51.724	56.9897	134.933	137.516	123.255	6.37633	6.31878	6.96276	BraA02g005900.3C	protein_coding	chrA02:2808869-2810416:+	gi|685270044|ref|XP_009126036.1|	1555	0	PREDICTED: peroxidase 56-like [Brassica rapa]	gi|923700826|ref|XM_013804148.1|	993	0	PREDICTED: Brassica napus peroxidase 56-like (LOC106364610), mRNA	Q9LXG3
	BraA02g007250.3C	16.162	1.65488	13.1401	1.99432	2.13668	1.67816	0.64059	0.799766	0.849191	27.706	26.7559	31.1984	7.73728	7.86216	9.43122	0.264372	0	0	17.1539	12.5691	11.3655	2.70579	2.25934	3.1041	16.1211	13.1661	14.577	27.2211	30.3125	26.9987	27.6597	22.8532	25.0395	0.267884	0.713272	0.494035	BraA02g007250.3C	protein_coding	chrA02:3435157-3436712:-	gi|685270377|ref|XP_009126210.1|	1619	0	PREDICTED: peroxidase 57 [Brassica rapa]	gi|685270376|ref|XM_009127962.1|	933	0	PREDICTED: Brassica rapa peroxidase 57 (LOC103851131), mRNA	Q43729
	BraA02g008560.3C	16.9532	3.94065	18.7387	35.437	33.3318	34.16	42.0522	45.9388	44.4396	23.8512	19.9016	18.2596	23.2363	22.1042	24.9772	2.89878	1.1482	2.56907	13.9641	15.9458	22.4612	26.5716	22.2139	21.4457	32.6411	34.3239	35.7445	21.7809	20.3172	22.3039	76.1201	74.5794	59.8288	9.6129	11.1726	14.7735	BraA02g008560.3C	protein_coding	chrA02:4053621-4055173:-	gi|685270743|ref|XP_009126399.1|	1636	0	PREDICTED: peroxidase N-like isoform X1 [Brassica rapa]	gi|685270742|ref|XM_009128151.1|	936	0	PREDICTED: Brassica rapa peroxidase N-like (LOC103851309), transcript variant X1, mRNA	Q42517
	BraA02g011630.3C	4.64711	1.66134	4.92589	8.4941	8.43334	8.65228	9.05166	7.41618	8.48022	14.9257	14.5548	16.6961	45.6617	44.0979	48.7181	16.2177	18.3806	30.8154	7.06964	4.98089	3.66581	5.62335	4.78595	5.39543	3.73725	6.26092	3.97428	13.9132	10.9353	10.4645	34.9798	28.9169	25.4779	8.15284	6.68681	10.5249	BraA02g011630.3C	protein_coding	chrA02:5643103-5644617:+	gi|685271423|ref|XP_009126754.1|	1733	0	PREDICTED: peroxidase 67 [Brassica rapa]	gi|685271422|ref|XM_009128506.1|	981	0	PREDICTED: Brassica rapa peroxidase 67 (LOC103851641), mRNA	Q9LVL2
	BraA02g018770.3C	16.612	6.55247	15.1808	19.1817	16.5138	18.0673	45.8248	49.875	41.1671	18.5609	18.1048	18.5449	19.1894	15.8605	21.7382	5.26109	4.73862	8.40629	14.2016	11.4577	14.8193	37.196	30.9883	36.4591	14.3621	11.4365	11.2437	7.88438	7.01428	10.0131	39.9795	34.4882	37.4913	14.1333	14.4301	17.0107	BraA02g018770.3C	protein_coding	chrA02:10619233-10620730:-	gi|685273269|ref|XP_009127676.1|	1785	0	PREDICTED: peroxidase 11-like [Brassica rapa]	gi|685273268|ref|XM_009129428.1|	1005	0	PREDICTED: Brassica rapa peroxidase 11-like (LOC103852534), mRNA	Q96519
	BraA02g044450.3C	918.431	295.599	966.139	785.829	790.146	783.686	260.405	251.52	246.604	326.445	300.943	326.124	536.918	536.574	549.98	64.9881	67.6913	142.391	335.78	435.959	466.935	467.78	330.577	346.941	785.356	695.109	714.041	141.993	137.314	144.38	419.639	447.331	406.56	66.267	61.6715	65.6901	BraA02g044450.3C	protein_coding	chrA02:30629337-30630877:-	gi|923538171|ref|XP_013722042.1|	1583	0	PREDICTED: peroxidase 69-like [Brassica napus]	gi|923538170|ref|XM_013866588.1|	999	0	PREDICTED: Brassica napus peroxidase 69-like (LOC106425864), mRNA	Q96511
	BraA03g002070.3C	1.97819	0.175954	2.0192	3.236	1.32901	3.04271	0.175142	0.478321	0.101576	2.13213	1.6487	2.19115	1.70861	2.50783	4.95488	0	0	0	5.92762	4.92042	3.59379	2.30154	1.17928	1.33155	4.43517	3.68276	3.90574	2.74661	1.91711	1.76957	1.24669	2.75736	2.46656	0.256344	0	0	BraA03g002070.3C	protein_coding	chrA03:930231-931870:-	gi|685279910|ref|XP_009130879.1|	1704	0	PREDICTED: peroxidase 52-like [Brassica rapa]	gi|923597363|ref|XM_013884599.1|	975	0	PREDICTED: Brassica napus peroxidase 52-like (LOC106442978), mRNA	Q9FLC0
	BraA03g008170.3C	14.5646	1.01131	11.6055	1.38735	1.17517	1.67816	0.64059	0.199941	0.530744	26.0592	22.8033	27.9545	6.34854	7.76136	8.2292	0	0	0	12.0077	8.85553	7.90646	2.20472	0.616185	0.856303	13.1992	10.6341	10.787	16.5734	20.2954	19.232	16.2351	14.9042	17.767	0.178589	0	0.197614	BraA03g008170.3C	protein_coding	chrA03:3508820-3510717:-	gi|685281417|ref|XP_009131612.1|	1624	0	PREDICTED: peroxidase 57-like [Brassica rapa]	gi|923541063|ref|XM_013874376.1|	933	0	PREDICTED: Brassica napus peroxidase 57-like (LOC106433547), mRNA	Q43729
	BraA03g020650.3C	1.37616	0	1.65258	1.3446	1.47259	0.760911	0.39419	0	0.0914468	6.67654	6.89756	8.54812	1.36731	1.56305	1.43382	0	0	0	4.926	2.543	1.6177	0.518006	0	0.184425	3.73248	4.10075	4.10229	7.09907	7.05381	6.37241	1.55405	1.88319	1.82406	0	0	0	BraA03g020650.3C	protein_coding	chrA03:9793593-9795956:-	gi|685284851|ref|XP_009133329.1|	1659	0	PREDICTED: peroxidase 24 [Brassica rapa]	gi|685284850|ref|XM_009135081.1|	1083	0	PREDICTED: Brassica rapa peroxidase 24 (LOC103857839), mRNA	Q9ZV04
	BraA03g021960.3C	49.626	29.2028	46.1986	117.733	118.011	126.206	181.349	188.915	191.632	138.882	142.509	130.99	61.0415	62.409	60.0544	2.5067	2.18439	3.49108	85.8421	74.4855	77.1221	93.5951	62.2224	64.7507	119.132	124.068	128.264	90.5115	85.3158	83.1981	137.687	134.346	139.919	39.4546	37.5831	50.122	BraA03g021960.3C	protein_coding	chrA03:10536466-10537865:-	gi|685285172|ref|XP_009133494.1|	1735	0	PREDICTED: peroxidase 25-like [Brassica rapa]	gi|685285171|ref|XM_009135246.1|	984	0	PREDICTED: Brassica rapa peroxidase 25-like (LOC103857984), mRNA	O80822
	BraA03g031370.3C	16.5959	4.41244	17.6765	3.16276	3.48661	3.81512	7.73001	6.42929	9.37386	43.518	43.6795	45.1488	24.28	27.0907	22.8095	1.90324	1.71994	4.83004	8.14133	7.12921	4.74327	6.63735	4.2388	3.28778	17.1184	23.0397	27.3313	43.2815	42.8919	47.5708	38.8629	37.2916	33.313	5.74269	4.20572	9.48425	BraA03g031370.3C	protein_coding	chrA03:15598584-15600774:-	gi|685287587|ref|XP_009134737.1|	1704	0	PREDICTED: peroxidase 28-like [Brassica rapa]	gi|685287586|ref|XM_009136489.1|	972	0	PREDICTED: Brassica rapa peroxidase 28-like (LOC103859007), mRNA	Q9SS67
	BraA03g052860.3C	16.1521	0.913501	15.8199	3.877	3.39684	2.72056	1.09114	1.29132	1.68753	44.5662	39.0718	47.6835	15.8685	18.0275	19.0175	0	0.254341	0	7.76462	7.19053	8.93614	4.77956	2.75511	5.42405	19.8224	14.5914	14.677	16.5595	23.368	23.0595	46.6016	44.8219	39.6975	1.24214	1.61992	1.27628	BraA03g052860.3C	protein_coding	chrA03:27382641-27384044:+	gi|685293329|ref|XP_009137569.1|	1618	0	PREDICTED: peroxidase 44-like [Brassica rapa]	gi|685293328|ref|XM_009139321.1|	939	0	PREDICTED: Brassica rapa peroxidase 44-like (LOC103861601), mRNA	Q93V93
	BraA03g052870.3C	36.2256	10.3226	34.4034	13.1818	13.7997	12.5497	14.2757	17.7804	16.6644	64.491	53.9755	50.3379	82.8907	90.5382	87.2785	4.59696	4.83248	11.7068	13.5407	15.611	19.0507	18.2221	12.7552	11.8053	52.2591	59.0699	53.5903	51.7024	53.0541	53.4687	85.8345	76.9081	77.3827	24.3104	27.6399	22.9731	BraA03g052870.3C	protein_coding	chrA03:27386640-27387760:+	gi|685293333|ref|XP_009137571.1|	1632	0	PREDICTED: peroxidase 44-like [Brassica rapa]	gi|685293332|ref|XM_009139323.1|	939	0	PREDICTED: Brassica rapa peroxidase 44-like (LOC103861603), mRNA	Q93V93
	BraA03g055510.3C	115.01	18.1554	114.101	65.9278	58.6029	66.987	16.8493	20.0279	23.2909	331.961	295.275	319.2	217.937	224.724	214.082	9.07949	10.2564	19.7871	140.463	107.1	93.6234	67.974	40.6584	41.3557	133.224	115.554	121.634	233.276	250.621	230.044	188.438	201.239	187.235	7.07043	8.16543	10.4629	BraA03g055510.3C	protein_coding	chrA03:28991228-28993201:+	gi|685294005|ref|XP_009137893.1|	1652	0	PREDICTED: peroxidase 45 [Brassica rapa]	gi|685294004|ref|XM_009139645.1|	978	0	PREDICTED: Brassica rapa peroxidase 45 (LOC103861933), mRNA	Q96522
	BraA03g060780.3C	0.188537	0.645639	0.0962227	0.695915	1.17896	0.443047	0.734465	1.10323	0.85193	7.96931	8.84573	7.46582	7.96127	5.66284	7.14261	16.0461	17.4626	10.8351	1.81653	0.955279	0.297449	2.21183	2.67875	3.00673	1.1119	0.406416	0.194987	7.61677	5.50531	6.95697	2.51349	2.39237	3.69416	1.97082	1.53337	3.0729	BraA03g060780.3C	protein_coding	chrA03:32377265-32379480:+	gi|923919305|ref|XP_013728986.1|	1613	0	PREDICTED: peroxidase 50-like isoform X1 [Brassica napus]	gi|923919304|ref|XM_013873532.1|	907	0	PREDICTED: Brassica napus peroxidase 50-like (LOC106432696), transcript variant X1, mRNA	Q43731
	BraA04g026300.3C	52.6728	37.0226	49.5942	22.7045	21.4096	22.1254	13.9275	12.5687	15.2519	27.1059	29.7948	29.3111	26.4428	22.963	22.7251	17.1187	13.1875	23.7832	33.2415	21.7827	28.0271	22.2619	16.018	18.1115	35.3357	31.7845	33.8976	34.3091	34.6648	35.3107	32.8725	30.244	31.1533	11.9861	13.0997	20.1747	BraA04g026300.3C	protein_coding	chrA04:18751599-18753371:-	gi|685301859|ref|XP_009141629.1|	1674	0	PREDICTED: peroxidase 21-like [Brassica rapa]	gi|685301858|ref|XM_009143381.1|	987	0	PREDICTED: Brassica rapa peroxidase 21-like (LOC103865578), mRNA	Q42580
	BraA04g030320.3C	0.260921	0	0.0887769	0.080258	0.0988849	0.0817527	0.254112	0.37013	0	0.179333	0.469036	0.353236	0.367261	0.279891	0.599083	0	0	0	6.61565	6.78646	5.76307	6.95685	1.80607	2.2787	6.24844	6.9369	4.94722	12.0837	12.3355	10.8689	4.54523	3.86268	6.39057	0	0.943144	0.365821	BraA04g030320.3C	protein_coding	chrA04:20767767-20769567:-	gi|685302976|ref|XP_009142195.1|	1811	0	PREDICTED: probable peroxidase 26 [Brassica rapa]	gi|685302975|ref|XM_009143947.1|	1008	0	PREDICTED: Brassica rapa probable peroxidase 26 (LOC103866074), mRNA	O22862
	BraA05g009840.3C	7.43704	3.68108	6.69813	8.07386	8.75398	9.04664	28.8866	30.7185	28.7622	10.3734	12.3623	12.615	9.05177	10.1364	11.0203	2.95401	3.8136	5.14254	4.96926	4.8765	3.86505	19.4092	16.352	16.1461	10.3201	6.97843	7.601	3.87958	4.54197	5.51003	18.943	18.2263	16.8864	6.73479	9.86743	8.18826	BraA05g009840.3C	protein_coding	chrA05:5251381-5252585:-	gi|685305897|ref|XP_009143676.1|	1782	0	PREDICTED: peroxidase 20 [Brassica rapa]	gi|685305896|ref|XM_009145428.1|	996	0	PREDICTED: Brassica rapa peroxidase 20 (LOC103867369), mRNA	Q9SLH7
	BraA05g025370.3C	8.84739	9.96806	8.02738	62.4275	61.4719	61.574	37.8603	42.3102	39.8772	96.833	87.6177	91.3748	29.4348	32.8817	27.6128	2.64009	6.20803	7.93731	37.886	19.0179	20.5849	46.5118	37.5062	33.696	43.5055	37.0839	36.7852	81.2779	92.9497	84.7715	73.1049	71.6309	69.7795	9.51165	14.052	12.6863	BraA05g025370.3C	protein_coding	chrA05:19060331-19061693:-	gi|685309691|ref|XP_009145451.1|	1670	0	PREDICTED: peroxidase 30 [Brassica rapa]	gi|685309690|ref|XM_009147203.1|	981	0	PREDICTED: Brassica rapa peroxidase 30 (LOC103249141), mRNA	Q9LSY7
	BraA05g040810.3C	9.49754	1.16157	10.5334	7.2473	9.24079	9.69996	3.82438	3.69204	4.12654	85.9586	82.1471	89.85	21.3057	20.1802	18.3319	0.128468	0.248778	0.477114	22.5991	14.8994	17.0971	11.8823	8.68339	8.42622	25.7538	22.6387	26.1618	65.6888	72.1261	63.0824	88.632	74.3566	78.4634	2.95063	3.96121	3.55304	BraA05g040810.3C	protein_coding	chrA05:27603268-27604480:+	gi|685313615|ref|XP_009147405.1|	1549	0	PREDICTED: peroxidase 27 [Brassica rapa]	gi|685313614|ref|XM_009149157.1|	960	0	PREDICTED: Brassica rapa peroxidase 27 (LOC103870957), mRNA	Q43735
	BraA06g010710.3C	15.5306	11.6888	16.2277	7.88649	9.29891	9.1563	7.33887	4.69297	7.37067	13.2638	12.7861	16.7021	23.283	23.7573	22.8782	6.85165	7.25992	21.9652	18.1743	36.4117	30.3498	13.4272	8.33625	6.90899	23.0582	57.6459	59.3055	27.3463	26.4933	28.7555	15.1916	14.0903	15.6653	42.0052	37.1706	35.5606	BraA06g010710.3C	protein_coding	chrA06:5812997-5814358:-	gi|685316449|ref|XP_009148834.1|	1542	0	PREDICTED: peroxidase 4 [Brassica rapa]	gi|685316448|ref|XM_009150586.1|	954	0	PREDICTED: Brassica rapa peroxidase 4 (LOC103872253), mRNA	Q9LE15
	BraA06g017920.3C	20.0035	14.256	23.3591	17.8512	18.5313	17.1004	7.29551	6.30576	5.02159	27.3273	23.7948	23.3196	111.494	105.346	111.946	70.0606	69.4054	183.642	15.2782	23.0236	25.7147	18.7878	13.7652	12.7529	20.4784	34.2477	29.3717	11.7614	12.1331	10.4492	33.45	29.5958	31.6137	33.4812	32.3145	58.0821	BraA06g017920.3C	protein_coding	chrA06:9970737-9973309:-	gi|685318817|ref|XP_009149762.1|	1819	0	PREDICTED: peroxidase 34-like [Brassica rapa]	gi|923644599|ref|XM_013786965.1|	1065	0	PREDICTED: Brassica napus peroxidase 34-like (LOC106347437), mRNA	Q9SMU8
	BraA06g017950.3C	0	0	0	0	0.0938568	0	0	0.0878274	0	3.06385	3.82861	3.18511	1.65579	1.06264	1.46217	0.348389	0.787093	0.970401	0.167447	0	0	0	0	0	0.265555	0	0	1.62684	1.14787	0.812302	2.11304	2.18231	3.15413	0.0784481	0.0895188	0.086805	BraA06g017950.3C	protein_coding	chrA06:9994186-9999056:-	gi|685318820|ref|XP_009149763.1|	1806	0	PREDICTED: peroxidase 34-like isoform X1 [Brassica rapa]	gi|685318819|ref|XM_009151515.1|	1062	0	PREDICTED: Brassica rapa peroxidase 34-like (LOC103873087), transcript variant X1, mRNA	Q9SMU8
	BraA06g027580.3C	230.296	71.9509	234.981	176.209	172.871	174.243	107.385	109.329	108.99	149.2	139.155	154.205	355.925	328.451	354.257	34.2378	35.2893	69.1602	50.429	83.979	92.1174	122.527	96.5794	105.034	347.59	468.134	463.269	85.8696	92.6708	86.8673	247.571	255.144	252.455	30.0917	31.4059	32.1049	BraA06g027580.3C	protein_coding	chrA06:19258378-19262965:-	gi|685320903|ref|XP_009150480.1|	1492	0	PREDICTED: peroxidase 69 [Brassica rapa]	gi|685320902|ref|XM_009152232.1|	1005	0	PREDICTED: Brassica rapa peroxidase 69 (LOC103873829), mRNA	Q96511
	BraA06g031450.3C	0.170896	0	0	0	0	0	0	0.090909	0	0.969025	1.47458	1.64844	0.631431	0.274981	0	0	0	0	1.21326	1.03908	0.539235	0.455653	0	0	0.45812	1.38146	0.795343	5.72534	5.62387	4.87666	0.637927	0.903551	0.753415	0	0	0.0898508	BraA06g031450.3C	protein_coding	chrA06:21676205-21677931:-	gi|685322081|ref|XP_009150933.1|	1744	0	PREDICTED: probable peroxidase 61 [Brassica rapa]	gi|923659683|ref|XM_013791699.1|	1026	0	PREDICTED: Brassica napus probable peroxidase 61 (LOC106352007), mRNA	Q9FLV5
	BraA07g004440.3C	12.1304	6.38388	15.5711	13.8226	13.3737	12.0932	4.20643	4.79074	5.29442	27.1909	27.5546	31.0715	15.619	20.8986	17.4525	1.16349	1.12654	1.44034	16.6831	12.4787	13.0485	8.33072	8.63756	9.63072	22.2698	16.541	18.1528	40.5667	37.3121	38.2502	34.7937	29.4438	34.0316	3.58049	2.39167	11.2093	BraA07g004440.3C	protein_coding	chrA07:3392944-3394457:+	gi|685376555|ref|XP_009121206.1|	1643	0	PREDICTED: peroxidase 64 [Brassica rapa]	gi|923897757|ref|XM_013864027.1|	951	0	PREDICTED: Brassica napus peroxidase 64-like (LOC106423244), mRNA	Q43872
	BraA08g003660.3C	22.9836	10.046	25.4756	26.8938	27.568	33.1854	38.0755	45.2919	46.7525	56.9173	56.4791	51.3243	14.6746	12.2002	15.6992	0.999971	0.537897	1.13476	32.682	25.8519	27.1643	21.564	17.0916	16.6444	20.6645	15.323	17.317	39.2236	40.488	40.9571	30.4092	35.2444	34.8973	11.1833	14.0462	11.5441	BraA08g003660.3C	protein_coding	chrA08:2645109-2647875:-	gi|685341089|ref|XP_009107290.1|	1642	0	PREDICTED: peroxidase 10 [Brassica rapa]	gi|685341088|ref|XM_009109042.1|	1110	0	PREDICTED: Brassica rapa peroxidase 10 (LOC103832931), mRNA	Q9FX85
	BraA08g034380.3C	6.75732	0.686909	5.64333	0.161962	0.399103	0.329957	0.512802	0.280098	0.396544	8.41409	8.61337	8.19763	2.87192	1.69448	2.84969	0	0	0	4.18316	2.93468	3.59976	2.05906	0.671388	0.699764	5.55193	5.01308	3.90267	4.15065	3.82346	4.14494	15.1625	14.198	13.4121	0	0.190328	0	BraA08g034380.3C	protein_coding	chrA08:22357720-22359048:+	gi|685351216|ref|XP_009111057.1|	1593	0	PREDICTED: peroxidase 2-like [Brassica rapa]	gi|685351215|ref|XM_009112809.1|	999	0	PREDICTED: Brassica rapa peroxidase 2-like (LOC103836534), mRNA	Q67Z07
	BraA08g034400.3C	2.39956	0	1.13718	0.316325	0.292305	0.322216	1.085	0.638229	0.290431	4.94769	3.32755	5.74294	0.90469	0.643504	1.09627	0	0	0	0.434576	0.868435	0.540816	0.639785	0.7493	0.195242	2.11353	1.84735	1.94987	4.3066	3.25711	3.1201	9.59697	5.8903	8.22791	0.0814387	0	0	BraA08g034400.3C	protein_coding	chrA08:22362796-22364381:+	gi|685351220|ref|XP_009111058.1|	1703	0	PREDICTED: peroxidase 2-like [Brassica rapa]	gi|685351219|ref|XM_009112810.1|	1023	0	PREDICTED: Brassica rapa peroxidase 2-like (LOC103836536), mRNA	Q67Z07
	BraA09g006280.3C	5.04505	1.3039	6.89857	7.46635	4.54548	5.10009	4.17173	4.5573	3.22596	12.2671	15.9136	14.3043	2.11026	4.79918	2.6227	1.33909	1.55587	0.745976	5.88901	6.46291	5.20616	5.48209	3.95335	3.68671	9.7987	12.209	11.026	11.3492	9.35342	10.3033	5.17763	5.53609	6.99424	0.723664	0.929012	0.700661	BraA09g006280.3C	protein_coding	chrA09:3658389-3661012:+	gi|674913451|emb|CDY19853.1|	1315	6e-180	BnaA09g05060D [Brassica napus]	gi|923909610|ref|XM_013869195.1|	548	0	PREDICTED: Brassica napus probable peroxidase 61 (LOC106428441), mRNA	Q9FLV5
	BraA09g008980.3C	23.9201	2.8703	22.1126	5.83064	5.13132	7.95431	7.47225	6.60231	6.24557	43.1561	41.8634	48.5748	36.4482	36.1892	41.302	4.60304	2.92001	6.77907	36.6185	24.9258	21.8359	13.8385	9.98861	12.5958	40.4094	33.9295	36.5243	37.8005	42.151	42.3005	64.7413	64.3084	61.7916	18.0134	20.3107	29.7798	BraA09g008980.3C	protein_coding	chrA09:5089805-5091002:-	gi|685354168|ref|XP_009112219.1|	1256	6e-172	PREDICTED: peroxidase 73 [Brassica rapa]	gi|685354167|ref|XM_009113971.1|	774	0	PREDICTED: Brassica rapa peroxidase 73 (LOC103837614), mRNA	Q43873
	BraA09g009660.3C	60.9537	29.6077	65.9239	41.0085	44.4315	45.5106	50.7742	54.639	54.7926	90.4728	80.2902	87.172	52.2988	54.7196	46.1967	0.729762	0.942116	8.46948	35.1624	34.082	33.4645	40.2954	27.9702	26.0992	47.9302	49.0164	50.6101	67.4726	64.2777	58.9573	89.5368	86.9446	79.1977	31.0571	30.0958	35.6383	BraA09g009660.3C	protein_coding	chrA09:5475935-5477464:-	gi|685354337|ref|XP_009112290.1|	1726	0	PREDICTED: peroxidase 72-like [Brassica rapa]	gi|685354336|ref|XM_009114042.1|	1014	0	PREDICTED: Brassica rapa peroxidase 72-like (LOC103837680), mRNA	Q9FJZ9
	BraA09g027240.3C	19.3034	30.0791	20.6158	24.1628	30.0755	27.0489	58.4876	59.5196	66.3274	201.497	198.465	198.175	48.9636	54.5472	52.3236	2.38865	1.70416	7.23696	74.8657	42.3828	41.1698	48.5133	38.0923	44.7923	52.7049	42.8632	52.7748	134.729	133.543	127.949	89.2128	86.2783	82.2996	15.1167	14.4396	18.2306	BraA09g027240.3C	protein_coding	chrA09:18574662-18576108:-	gi|685343599|ref|XP_009108181.1|	1718	0	PREDICTED: peroxidase 39 [Brassica rapa]	gi|685343598|ref|XM_009109933.1|	981	0	PREDICTED: Brassica rapa peroxidase 39 (LOC103833883), mRNA	Q9SUT2
	BraA09g033990.3C	9.57312	2.71137	8.31441	3.95202	2.19593	3.55201	0.490698	0.357367	0.948629	11.8607	14.6728	13.3012	10.4606	7.83696	8.09795	0	0	0.109681	5.96169	4.33993	5.91764	2.41811	1.37668	2.96538	10.175	6.7882	8.33738	9.18465	10.0418	7.76729	21.0469	18.6474	18.2638	0.159601	0.728498	0.264905	BraA09g033990.3C	protein_coding	chrA09:26583770-26585189:-	gi|685361186|ref|XP_009115028.1|	1768	0	PREDICTED: peroxidase 7-like [Brassica rapa]	gi|685361185|ref|XM_009116780.1|	1038	0	PREDICTED: Brassica rapa peroxidase 7-like (LOC103840283), mRNA	Q9SY33
	BraA09g059310.3C	16.3129	21.934	15.3231	3.13996	2.95842	2.16365	4.77591	4.47198	4.07001	21.3578	18.3502	19.5103	12.1498	13.3121	10.5373	6.33543	4.77108	10.0651	7.61253	14.1983	14.1051	4.48288	2.73449	1.59604	4.93641	19.6319	20.2867	35.7967	37.2946	34.3687	2.77517	2.43402	2.05899	41.4657	46.2322	40.3055	BraA09g059310.3C	protein_coding	chrA09:41857057-41859160:+	gi|685367870|ref|XP_009117893.1|	1388	0	PREDICTED: LOW QUALITY PROTEIN: peroxidase 4-like [Brassica rapa]	gi|685367869|ref|XM_009119645.1|	816	0	PREDICTED: Brassica rapa peroxidase 4-like (LOC103842960), mRNA	Q9LE15
	BraA09g064540.3C	9.6396	2.97839	7.76798	23.9704	24.2268	26.992	31.0299	35.3011	38.629	10.2518	11.4914	9.89061	6.21283	5.11579	6.29037	0.713714	0.967468	5.69886	42.8106	37.4283	36.6062	50.8623	40.2563	41.611	71.3752	72.1812	70.8352	70.9879	74.6846	75.2835	109.627	117.812	111.239	34.2311	26.5181	29.662	BraA09g064540.3C	protein_coding	chrA09:44253329-44254744:-	gi|685369521|ref|XP_009118603.1|	1408	0	PREDICTED: LOW QUALITY PROTEIN: peroxidase 3-like [Brassica rapa]	gi|923890303|ref|XM_013860837.1|	579	0	PREDICTED: Brassica napus peroxidase 3 (LOC106420000), mRNA	O23044
	BraA09g064570.3C	1.36133	0.0887969	1.019	0.0837475	0.206368	0.255921	0.176773	0.289667	0.307568	13.0055	13.5083	12.3479	4.0239	3.50473	5.09034	0	0	0	0.368175	0.0919678	0.477273	0.387164	0.198378	0.930432	2.23825	2.64107	1.87721	7.33292	7.82402	5.26886	9.00173	7.67738	7.55754	0	0.098415	0.0954316	BraA09g064570.3C	protein_coding	chrA09:44264643-44266070:-	gi|685369526|ref|XP_009118606.1|	1568	0	PREDICTED: peroxidase 2-like [Brassica rapa]	gi|923890411|ref|XM_013860881.1|	963	0	PREDICTED: Brassica napus peroxidase 2-like (LOC106420046), mRNA	Q67Z07
	BraA10g003850.3C	1.63359	0	2.7791	0.33499	0.206368	0.853071	0.26516	0.675889	0.410091	15.3446	15.2702	14.3752	5.17359	5.35445	5.71547	0	0	0	0.184088	0.0919678	0.190909	0	0.198378	0.310144	2.53019	2.2498	2.62809	4.38186	5.38427	5.09026	12.7767	9.88462	10.136	0	0	0	BraA10g003850.3C	protein_coding	chrA10:2015921-2017259:+	gi|923723058|ref|XP_013665651.1|	1616	0	PREDICTED: peroxidase 2-like [Brassica napus]	gi|923723057|ref|XM_013810197.1|	966	0	PREDICTED: Brassica napus peroxidase 2-like (LOC106370132), mRNA	Q67Z07
	BraA10g007260.3C	9.74106	4.60111	9.85729	10.8487	10.6932	11.0507	5.39768	4.64577	5.21746	25.3663	21.1034	19.2696	7.00329	8.01712	7.35426	0.708792	0.915044	1.09681	17.7999	14.5515	13.3368	12.807	12.6654	14.5399	19.1795	14.6625	16.5011	23.4167	28.0237	24.2108	24.0024	25.2184	23.1177	3.91023	3.73355	5.1215	BraA10g007260.3C	protein_coding	chrA10:4372585-4374124:-	gi|685277191|ref|XP_009129550.1|	1853	0	PREDICTED: peroxidase 9 [Brassica rapa]	gi|685277190|ref|XM_009131302.1|	1044	0	PREDICTED: Brassica rapa peroxidase 9 (LOC103854363), mRNA	Q96512
	BraA10g020500.3C	131.411	192.267	131.076	170.443	178.267	169.304	195.848	212.355	213.628	178.739	184.468	174.417	87.2104	95.3497	92.9039	6.3246	7.27196	26.4248	50.3468	72.7053	81.7667	88.3056	78.8236	90.7973	108.469	72.9888	71.9734	172.586	168.095	170.69	161.331	168.472	165.63	44.8602	48.347	76.724	BraA10g020500.3C	protein_coding	chrA10:14848052-14849703:+	gi|674940978|emb|CDX92492.1|	1645	0	BnaA10g15310D [Brassica napus]	gi|685375598|ref|XM_009122600.1|	930	0	PREDICTED: Brassica rapa peroxidase N (LOC103845713), mRNA	Q42517
	BraA10g024180.3C	29.8431	7.10482	28.6539	21.3282	21.8482	22.974	17.1625	17.2413	19.6073	188.801	179.755	181.718	32.8131	37.0475	32.4158	0.124576	0.361858	0.925312	48.1395	46.305	43.4966	24.4611	16.0662	15.7365	36.9378	31.6881	29.5819	119.282	108.441	106.308	73.7626	74.7253	76.1725	1.93553	2.3047	2.60731	BraA10g024180.3C	protein_coding	chrA10:16590263-16593355:-	gi|685377387|ref|XP_009121602.1|	1518	0	PREDICTED: peroxidase 56 [Brassica rapa]	gi|685377386|ref|XM_009123354.1|	990	0	PREDICTED: Brassica rapa peroxidase 56 (LOC103846434), mRNA	Q9LXG3
Thioredoxin	BraA02g010240.3C	4.76303	4.32044	5.01371	4.30368	3.83586	3.91747	3.72064	3.53666	3.75522	9.71867	8.45508	8.91667	6.12808	5.85444	5.32157	2.86164	3.6493	4.73064	7.64855	9.60306	8.61036	4.60357	4.39228	3.95622	7.39495	8.12832	7.74818	9.92429	11.1302	10.3012	7.09069	7.345	6.31896	8.20388	9.30782	8.7648	BraA02g010240.3C	protein_coding	chrA02:4966415-4969793:+	gi|685271115|ref|XP_009126597.1|	2529	0	PREDICTED: protein disulfide isomerase-like 1-4 [Brassica rapa]	gi|685271114|ref|XM_009128349.1|	1758	0	PREDICTED: Brassica rapa protein disulfide isomerase-like 1-4 (LOC103851496), mRNA	Q9FF55
	BraA07g030170.3C	0	0.201356	0	4.17794	7.01943	6.38362	13.0277	15.3265	15.3437	2.33385	1.9977	1.04478	3.04154	3.75291	1.62006	7.52717	6.44719	4.03195	1.87847	1.25128	1.29872	0.658451	2.47414	2.81314	2.20672	3.32717	3.61825	3.65008	2.28926	1.82253	5.92618	6.52847	5.6453	5.08476	4.90966	5.19363	BraA07g030170.3C	protein_coding	chrA07:22093292-22094011:-	gi|685335076|ref|XP_009104980.1|	747	1e-99	PREDICTED: thioredoxin H8-like [Brassica rapa]	gi|923676333|ref|XM_013796763.1|	426	0	PREDICTED: Brassica napus thioredoxin H8-like (LOC106357077), mRNA	Q9CAS1
	BraA07g030180.3C	0	0.381235	0.19886	23.7307	28.3523	21.0595	44.9676	45.3927	37.8541	16.0682	9.24565	13.0556	25.5026	33.2287	25.8804	18.3624	16.1871	6.87044	4.34692	4.54076	2.04909	8.93445	4.68437	7.54546	15.4588	14.2788	18.5368	4.41525	1.80597	2.87555	34.4918	42.026	39.5091	28.5112	26.6193	31.5484	BraA07g030180.3C	protein_coding	chrA07:22097457-22098233:-	gi|685335078|ref|XP_009104981.1|	788	1e-105	PREDICTED: thioredoxin H8-like [Brassica rapa]	gi|685335077|ref|XM_009106733.1|	450	0	PREDICTED: Brassica rapa thioredoxin H8-like (LOC103830909), mRNA	Q9CAS1
	BraA07g034750.3C	64.4064	24.8304	57.4994	79.126	80.0031	80.4188	91.3732	91.6363	90.5666	107.43	101.401	109.122	83.4166	100.437	97.619	63.2876	71.7527	95.6739	8.77444	3.11723	2.83098	13.943	9.03535	6.35115	12.3693	14.7125	15.5092	52.6647	52.0406	56.3759	62.5396	63.6326	59.5197	37.8192	28.9793	32.1441	BraA07g034750.3C	protein_coding	chrA07:24676065-24676867:+	gi|685336804|ref|XP_009105663.1|	807	2e-108	PREDICTED: thioredoxin H8 [Brassica rapa]	gi|923918978|ref|XM_013873397.1|	456	0	PREDICTED: Brassica napus thioredoxin H8-like (LOC106432550), mRNA	Q9CAS1
	BraA07g039550.3C	13.8977	19.3722	13.4085	10.4529	9.52387	8.05277	8.62158	5.77258	6.98957	3.72918	4.20941	3.96269	7.63712	11.7427	7.96175	7.49888	8.16833	15.0439	8.78524	14.0834	17.4206	7.51249	4.9937	5.53006	4.89935	5.23244	5.11921	3.28283	2.38247	2.34165	6.39589	4.93215	7.27401	4.34199	2.1677	2.90274	BraA07g039550.3C	protein_coding	chrA07:27046879-27048210:-	gi|685338455|ref|XP_009106259.1|	1478	0	PREDICTED: thioredoxin-like protein CDSP32, chloroplastic [Brassica rapa]	gi|923894059|ref|XM_013862464.1|	921	0	PREDICTED: Brassica napus thioredoxin-like protein CDSP32, chloroplastic (LOC106421637), mRNA	Q9SGS4
	BraA08g001910.3C	1.20924	0.985951	0.82287	0	0.22914	0.568322	0.981397	0.42884	0.683013	1.66223	1.95637	2.04633	11.7017	8.2153	11.3041	0.567033	0.274513	2.63235	3.47481	0.612696	1.6958	0.644828	0	0	4.32213	2.60667	2.91808	3.77315	6.35205	3.96627	1.28968	3.1967	2.36936	0	0	0.423848	BraA08g001910.3C	protein_coding	chrA08:1366012-1366446:+	gi|685340422|ref|XP_009107015.1|	587	6e-75	PREDICTED: uncharacterized protein LOC103832704 [Brassica rapa]	gi|685340421|ref|XM_009108767.1|	427	0	PREDICTED: Brassica rapa uncharacterized LOC103832704 (LOC103832704), mRNA	Q9SEU6
	BraA05g037580.3C	97.8252	127.754	87.16	67.1299	72.8129	71.4971	105.364	93.9342	94.8225	71.3667	59.4619	60.8168	78.9846	81.8157	79.5378	74.6393	81.3026	98.2652	13.663	14.0717	18.093	15.9149	19.4805	18.4151	8.88949	6.47816	7.07347	8.37305	9.222	8.97334	10.3891	12.2729	10.7615	31.5128	15.7324	17.2169	BraA05g037580.3C	protein_coding	chrA05:25872878-25873648:-	gi|674904986|emb|CDY27984.1|	750	5e-99	BnaC05g43860D [Brassica napus]	gi|685312834|ref|XM_009148740.1|	423	0	PREDICTED: Brassica rapa thioredoxin H9-like (LOC103870598), transcript variant X2, mRNA	Q9C9Y6
	BraA08g005640.3C	11.7875	7.92904	11.5305	13.37	12.5642	10.8491	36.3529	45.1994	34.6768	26.0771	28.6057	26.181	92.809	100.629	99.8002	30.7461	42.4803	74.4137	53.7969	27.374	31.253	48.9762	50.4581	51.192	92.1631	92.9037	93.4628	52.0248	46.2117	47.1203	211.1	221.504	211.956	364.052	353.379	539.694	BraA08g005640.3C	protein_coding	chrA08:4490870-4491317:+	gi|685341603|ref|XP_009107463.1|	615	3e-80	PREDICTED: thioredoxin H5 [Brassica rapa]	gi|685341602|ref|XM_009109215.1|	357	0	PREDICTED: Brassica rapa thioredoxin H5 (LOC103833121), mRNA	Q39241
	BraA09g042280.3C	2.28703	2.23768	2.59383	7.03479	7.2229	6.68808	9.15686	10.0032	8.6119	16.2429	14.2522	15.481	5.3652	4.36144	5.7512	13.5841	12.8066	8.62954	14.4325	6.95277	4.81091	36.045	44.159	34.4467	42.7797	17.5289	18.6594	32.8014	32.5075	31.0059	45.2603	43.5307	56.0147	48.2967	49.8767	50.5024	BraA09g042280.3C	protein_coding	chrA09:32885001-32885974:-	gi|685362972|ref|XP_009115784.1|	598	1e-77	PREDICTED: thioredoxin H1 isoform X1 [Brassica rapa]	gi|685362971|ref|XM_009117536.1|	345	5e-180	PREDICTED: Brassica rapa thioredoxin H1 (LOC103841025), transcript variant X1, mRNA	P29448
	BraA09g061310.3C	68.571	105.59	69.9925	19.1103	21.4526	17.087	32.4943	32.0701	34.052	12.8103	14.6428	10.5136	13.6031	12.0948	8.60415	34.3122	30.4018	19.5354	44.3405	52.4651	54.4542	21.3504	28.921	22.542	21.2193	7.93632	11.1849	83.2111	84.2551	92.1534	13.2522	11.436	13.075	57.0719	67.1222	44.5207	BraA09g061310.3C	protein_coding	chrA09:42791117-42791851:-	gi|685368554|ref|XP_009118186.1|	664	2e-87	PREDICTED: thioredoxin-like protein CXXS1 [Brassica rapa]	gi|923867172|ref|XM_013852984.1|	381	0	PREDICTED: Brassica napus thioredoxin-like protein CXXS1 (LOC106412092), mRNA	Q8LDI5
	BraA10g029380.3C	77.2327	117.512	64.2471	26.9667	27.7486	30.1856	26.584	26.3077	25.5755	8.44243	10.9105	7.33644	8.47525	8.61205	7.426	13.3268	17.2777	12.1638	45.9228	49.79	43.2336	21.2344	35.4487	32.7401	14.979	9.17228	9.46545	4.11359	5.35839	6.47789	8.73369	8.99877	9.43838	4.42499	3.30826	7.93551	BraA10g029380.3C	protein_coding	chrA10:18766496-18767747:-	gi|685379085|ref|XP_009122280.1|	940	2e-127	PREDICTED: thioredoxin-like 3-1, chloroplastic [Brassica rapa]	gi|685379084|ref|XM_009124032.1|	501	0	PREDICTED: Brassica rapa thioredoxin-like 3-1, chloroplastic (LOC103847007), mRNA	Q9FG36
[truncated: 14 more columns]

## Sheet: hubGene
The FPKM and annotation of 10 hub genes involving clubroot resistances.
the module	GeneName	Abbreviations	DH199S0d1	DH199S0d2	DH199S0d3	DH199S2d1	DH199S2d2	DH199S2d3	DH199S5d1	DH199S5d2	DH199S5d3	DH199S8d1	DH199S8d2	DH199S8d3	DH199S13d1	DH199S13d2	DH199S13d3	DH199S22d1	DH199S22d2	DH199S22d3	DH40R0d1	DH40R0d2	DH40R0d3	DH40R2d1	DH40R2d2	DH40R2d3	DH40R5d1	DH40R5d2	DH40R5d3	DH40R8d1	DH40R8d2	DH40R8d3	DH40R13d1	DH40R13d2	DH40R13d3	DH40R22d1	DH40R22d2	DH40R22d3	Biotype	Position	NR:Seq-id	NR:Score	NR:Evalue	NR:Description	NT:Seq-id	NT:Score	NT:Evalue	NT:Description	Uniprot:UniProtKB-AC
greenyellow	BraA06g019050.3C	ARF 2	0	0	0	0	0	0	0	0	0	0	0	0	0	0.131163	0	0	0	0	85.3181	71.9896	76.005	89.3271	102.098	110.73	44.0532	39.1409	42.7422	74.3372	71.7478	73.7536	63.7691	59.3463	61.4521	94.5828	96.2623	106.073	protein_coding	chrA06:10828058-10833132:+	gi|674907202|emb|CDY25846.1|	939	1e-124	BnaA05g14370D,auxin response factor 2-like [Brassica napus]	gi|923643063|ref|XM_013786466.1|	266	8e-136	PREDICTED: Brassica napus auxin response factor 2-like (LOC106346983), transcript variant X1, mRNA	Q94JM3
greenyellow	BraA07g023520.3C	EDR1	0	0	0	0	0	0.0686722	0.142303	0.0388636	0	0.0376598	0	0.0741796	0.0385624	0	0	0.0513874	0.149267	0.0954228	5.74238	4.07188	3.5731	7.05146	8.26419	8.3222	3.21188	3.07098	2.83341	4.39125	4.94386	4.56493	5.61011	4.86698	5.04599	6.66495	6.10026	7.1829	protein_coding	chrA07:18692428-18702274:-	gi|685332966|ref|XP_009104156.1|	4173	0	PREDICTED: serine/threonine-protein kinase EDR1-like [Brassica rapa]	gi|685332972|ref|XM_009105911.1|	2364	0	PREDICTED: Brassica rapa serine/threonine-protein kinase EDR1-like (LOC103830172), transcript variant X4, mRNA	Q9C9U5
darkturquoise	BraA02g021090.3C	LOX4	17.6927	90.999	18.092	5.42265	6.21169	5.58335	27.3159	28.5225	26.2304	91.759	92.2966	90.4346	11.6358	12.0621	10.5022	21.3146	21.1136	11.3263	42.1699	25.9441	25.5914	10.1292	8.54018	9.33533	17.6773	23.9311	23.7185	193.178	197.165	190.318	28.5926	27.0724	27.1983	65.4119	68.4427	56.1806	protein_coding	chrA02:12340910-12344545:+	gi|685273796|ref|XP_009127939.1|	4942	0	PREDICTED: lipoxygenase 4, chloroplastic [Brassica rapa]	gi|685273795|ref|XM_009129691.1|	2760	0	PREDICTED: Brassica rapa lipoxygenase 4, chloroplastic (LOC103852787), mRNA	Q9FNX8
darkturquoise	BraA03g002480.3C	NHL3	366.404	829.67	387.272	117.579	112.065	114.997	395.432	331.461	317.953	658.983	691.02	672.017	244.316	261.143	259.048	125.594	129.027	106.421	469.061	337.169	353.859	152.004	131.139	138.374	274.185	355.812	375.355	1402.05	1415.78	1433.27	289.618	287.017	304.009	602.363	525.968	426.951	protein_coding	chrA03:1098367-1099074:-	gi|923538666|ref|XP_013723815.1|	998	1e-134	PREDICTED: protein YLS9-like [Brassica napus]	gi|685280031|ref|XM_009132689.1|	705	0	PREDICTED: Brassica rapa protein YLS9-like (LOC103855670), mRNA	Q9FNH6
darkturquoise	BraA04g019450.3C	NHL13	63.4849	205.516	64.1153	59.3061	58.6853	61.5682	131.289	124.364	128.128	190.348	188.874	192.242	72.5742	77.709	70.8433	109.784	101.417	77.3619	163.634	101.322	94.9177	83.9471	95.4496	93.3617	119.459	138.057	147.989	552.844	549.369	559.355	86.0982	97.2034	92.5805	217.59	246.961	188.024	protein_coding	chrA04:14698300-14699082:+	gi|685300037|ref|XP_009140759.1|	1296	5e-179	PREDICTED: NDR1/HIN1-like protein 13	gi|685300036|ref|XM_009142511.1|	783	0	PREDICTED: Brassica rapa uncharacterized LOC103864750 (LOC103864750), mRNA	Q9ZVD2
darkturquoise	BraA06g025120.3C	NAC29	29.4257	60.685	29.9668	11.6461	9.59161	11.1652	31.6155	32.7424	32.0974	85.3739	85.3859	82.9852	17.313	19.6919	18.4623	18.6086	18.5693	16.1315	39.8369	21.5434	22.2182	15.2594	20.5796	18.2973	23.1578	24.5868	26.3841	179.62	176.739	182.561	24.6171	22.1948	23.9353	32.196	31.1773	27.3225	protein_coding	chrA06:17511243-17512965:-	gi|685319937|ref|XP_009150140.1|	2139	0	PREDICTED: NAC transcription factor 29-like [Brassica rapa]	gi|685319936|ref|XM_009151892.1|	1299	0	PREDICTED: Brassica rapa NAC transcription factor 29-like (LOC103873485), mRNA	Q9SCK6
darkgrey	BraA06g001780.3C	AOP1	2.77435	2.26207	1.32154	1.02405	1.36686	0.956196	1.62117	1.47583	2.29832	35.181	37.4042	33.8034	2.05015	2.67846	1.365	0	0	0	6.56541	4.96684	4.96062	1.3808	1.8193	2.10689	8.42884	4.98374	4.11263	30.0708	29.1471	30.4845	9.36992	10.0723	11.4157	0	0.401135	0.388974	protein_coding	chrA06:1092381-1094101:-	gi|685314122|ref|XP_009147660.1|	1662	0	PREDICTED: probable 2-oxoglutarate-dependent dioxygenase AOP1 [Brassica rapa]	gi|685314121|ref|XM_009149412.1|	948	0	PREDICTED: Brassica rapa probable 2-oxoglutarate-dependent dioxygenase AOP1 (LOC103871183), mRNA	Q945B6
darkgrey	BraA03g027950.3C	EARLI 1	3.05317	0.213378	1.55823	10.0622	9.17416	8.60965	1.91153	3.48032	4.18813	66.3263	66.0963	67.5367	13.353	10.0594	10.0861	0	0	0	15.925	13.2598	16.7444	12.3271	12.3942	11.9243	14.9662	16.6888	14.6604	65.9709	67.7241	66.5239	35.5865	26.9811	24.9976	0.62173	0	0.687962	protein_coding	chrA03:13940589-13940990:-	gi|685286688|ref|XP_009134274.1|	357	8e-41	PREDICTED: lipid transfer protein EARLI 1-like [Brassica rapa]	gi|685286687|ref|XM_009136026.1|	402	0	PREDICTED: Brassica rapa lipid transfer protein EARLI 1-like (LOC103858635), mRNA	Q39176
darkgrey	BraA06g001760.3C	AOP1	3.85967	3.77638	3.75208	6.69927	5.74652	8.03336	9.21834	8.11492	8.20117	102.7	103.379	100.586	2.71635	3.35166	4.06924	0.129276	0.375513	0	31.5953	24.0262	26.7735	16.2694	12.655	12.6665	33.996	28.922	31.5536	95.1687	91.0654	92.7771	49.5932	46.1578	44.5652	1.30993	0.797224	2.02927	protein_coding	chrA06:1085943-1087213:-	gi|685314118|ref|XP_009147658.1|	1700	0	PREDICTED: probable 2-oxoglutarate-dependent dioxygenase AOP1 [Brassica rapa]	gi|685314117|ref|XM_009149410.1|	954	0	PREDICTED: Brassica rapa probable 2-oxoglutarate-dependent dioxygenase AOP1 (LOC103871181), mRNA	Q945B6
darkgrey	BraA10g024180.3C	POD56	29.8431	7.10482	28.6539	21.3282	21.8482	22.974	17.1625	17.2413	19.6073	188.801	179.755	181.718	32.8131	37.0475	32.4158	0.124576	0.361858	0.925312	48.1395	46.305	43.4966	24.4611	16.0662	15.7365	36.9378	31.6881	29.5819	119.282	108.441	106.308	73.7626	74.7253	76.1725	1.93553	2.3047	2.60731	protein_coding	chrA10:16590263-16593355:-	gi|685377387|ref|XP_009121602.1|	1518	0	PREDICTED: peroxidase 56 [Brassica rapa]	gi|685377386|ref|XM_009123354.1|	990	0	PREDICTED: Brassica rapa peroxidase 56 (LOC103846434), mRNA	Q9LXG3
[truncated: 15 more columns]
